# Supplementary material for: Pseudo-cyclic structures of mono- and di-azaderivatives of malondialdehydes. Synthesis and conformational disentanglement by computational analyses
Source: Royal Society of Chemistry journal article supplement (doi:10.1039/c4ob01507j), 2014-09-25
Supplement: c4ob01507j1.pdf [file c4ob01507j1.pdf]

## Electronic Supplementary Information (ESI)

# Syntheses and Tautomeric Equilibria in Mono- and Di-azaderivatives of Malonaldehyde. Tailoring Electronic Delocalization and Aromatic Transition Structures with Computational Studies.

María P. Romero-Fernández,<sup>a,\*</sup> Martín Ávalos,<sup>a</sup> Reyes Babiano,<sup>a</sup> Pedro Cintas,<sup>a</sup>  
José L. Jiménez,<sup>a</sup> Mark E. Light,<sup>b</sup> and Juan C. Palacios<sup>a</sup>

<sup>a</sup> *Departamento de Química Orgánica e Inorgánica, QUOREX Research Group, Facultad de Ciencias-UEX, Avda. de Elvas s/n E-06071 Badajoz, Spain,* <sup>b</sup> *Department of Chemistry, The University of Southampton, Southampton SO17 1BJ, U.K.*

[mpromero@unex.es](mailto:mpromero@unex.es)

### Contents:

1. Tables S1-S31 ..... S2-S28
2. Copies of IR, <sup>1</sup>HNMR and <sup>13</sup>CNMR spectra for all prepared compounds .... S29-S90
3. Computational data: cartesian coordinates for all optimized structures at M06-2X/6-311++G(d,p) level..... S91-S536
4. Computational data: cartesian coordinates for 32 and 33 optimized structures at B3LYP/6-311++G(d,p) level .....S537-S632

# 1. Tables S1-S31:

**Table S1.** Free energy values (hartrees) calculated for structures **13a-l**, **14a-l**, and **31-33a-l** in gas-phase, chloroform, dimethyl sulfoxide and ethanol

| Medium          |                   | a           | b           | c           | d           | e           | f           | g           | h           | i           | j           | k           | l           |
|-----------------|-------------------|-------------|-------------|-------------|-------------|-------------|-------------|-------------|-------------|-------------|-------------|-------------|-------------|
| 13 <sup>a</sup> | Gas-phase         | -800.462434 | -800.455411 | -800.457939 | -800.450189 | -800.446854 | -800.448436 | -800.452830 | -800.429701 | -800.436789 | -800.436752 | -800.436852 | -800.435836 |
|                 | CHCl <sub>3</sub> | -800.485304 | -800.480279 | -800.482823 | -800.477170 | -800.473552 | -800.472705 | -800.473126 | -800.455521 | -800.461828 | -800.461449 | -800.460957 | -800.459751 |
|                 | DMSO              | -800.484706 | -800.480645 | -800.484090 | -800.478603 | -800.474330 | -800.472716 | -800.471266 | -800.453971 | -800.457536 | -800.461070 | -800.458714 | -800.458281 |
|                 | EtOH              | -800.484111 | -800.483701 | -800.486019 | -800.482296 | -800.476364 | -800.476408 | -800.471820 | -800.459630 | -800.462040 | -800.464805 | -800.463098 | -800.462644 |
| 14 <sup>a</sup> | Gas-phase         | -952.842799 | -952.838739 | -952.839106 | -952.833424 | -952.828949 | -952.831178 | -952.833375 | -952.812505 | -952.817069 | -952.819497 | -952.820815 | -952.817830 |
|                 | CHCl <sub>3</sub> | -952.869873 | -952.868247 | -952.873636 | -952.863305 | -952.859093 | -952.861018 | -952.859105 | -952.841938 | -952.847293 | -952.849007 | -952.849517 | -952.846193 |
|                 | DMSO              | -952.869162 | -952.868154 | -952.870670 | -952.865053 | -952.860022 | -952.859184 | -952.858840 | -952.839676 | -952.844603 | -952.848695 | -952.846658 | -952.843210 |
|                 | EtOH              | -952.870502 | -952.870886 | -952.873636 | -952.866676 | -952.862331 | -952.861435 | -952.859190 | -952.845773 | -952.848871 | -952.853572 | -952.850839 | -952.847581 |
| 31 <sup>a</sup> | Gas-phase         | -517.412421 | -517.406853 | -517.407706 | -517.399505 | -517.395872 | -517.398235 | -517.403459 | -517.381932 | -517.387049 | -517.386230 | -517.387896 | -517.386223 |
|                 | CHCl <sub>3</sub> | -517.430112 | -517.426669 | -517.428136 | -517.421318 | -517.418409 | -517.417849 | -517.419449 | -517.402675 | -517.406886 | -517.407157 | -517.407153 | -517.404925 |
|                 | DMSO              | -517.428484 | -517.427175 | -517.428481 | -517.422598 | -517.419466 | -517.420781 | -517.416293 | -517.400019 | -517.403702 | -517.405738 | -517.404757 | -517.403087 |
|                 | EtOH              | -517.431492 | -517.429731 | -517.432314 | -517.425971 | -517.422949 | -517.420781 | -517.418427 | -517.407505 | -517.409407 | -517.411603 | -517.409672 | -517.407429 |
| 32 <sup>a</sup> | Gas-phase         | -631.894424 | -631.889904 | -631.890903 | -631.882701 | -631.879163 | -631.881327 | -631.886107 | -631.864754 | -631.870761 | -631.870129 | -631.869851 | -631.869637 |
|                 | CHCl <sub>3</sub> | -631.912841 | -631.910500 | -631.913568 | -631.905155 | -631.901222 | -631.901057 | -631.901673 | -631.886150 | -631.889414 | -631.891600 | -631.892100 | -631.889247 |
|                 | DMSO              | -631.912296 | -631.910380 | -631.915052 | -631.907117 | -631.903802 | -631.901674 | -631.900141 | -631.883946 | -631.888119 | -631.891936 | -631.889957 | -631.888618 |
|                 | EtOH              | -631.915290 | -631.914676 | -631.918434 | -631.910550 | -631.908028 | -631.905491 | -631.902325 | -631.890834 | -631.894278 | -631.897109 | -631.894783 | -631.893865 |
| 32 <sup>b</sup> | Gas-phase         | -632.173563 | -632.167411 | -632.168054 | -632.160385 | -632.155783 | -632.158059 | -632.162542 | -632.139768 | -632.145322 | -632.145291 | -632.145380 | -632.144781 |
|                 | CHCl <sub>3</sub> | -632.191188 | -632.188582 | -632.190202 | -632.182960 | -632.178937 | -632.177600 | -632.177480 | -632.159766 | -632.164508 | -632.166158 | -632.165511 | -632.163385 |
|                 | DMSO              | -632.190226 | -632.188723 | -632.191643 | -632.184631 | -632.179924 | -632.178193 | -632.175163 | -632.158201 | -632.161366 | -632.164959 | -632.163591 | -632.162602 |
|                 | EtOH              | -632.194666 | -632.192873 | -632.195487 | -632.188030 | -632.183804 | -632.181842 | -632.177337 | -632.164220 | -632.167594 | -632.171146 | -632.168244 | -632.167520 |
| 33 <sup>a</sup> | Gas-phase         | -721.904952 | -721.898607 | -721.900759 | -721.893753 | -721.889814 | -721.891362 | -721.895593 | -721.873326 | -721.879591 | -721.880821 | -721.880029 | -721.879245 |
|                 | CHCl <sub>3</sub> | -721.925191 | -721.922168 | -721.924757 | -721.917885 | -721.914289 | -721.913751 | -721.912974 | -721.895997 | -721.900809 | -721.902543 | -721.902203 | -721.899209 |
|                 | DMSO              | -721.925694 | -721.923185 | -721.926196 | -721.922095 | -721.917107 | -721.915081 | -721.912347 | -721.896084 | -721.899155 | -721.901672 | -721.902007 | -721.900273 |
|                 | EtOH              | -721.927268 | -721.924533 | -721.927550 | -721.921394 | -721.918655 | -721.917294 | -721.912803 | -721.901398 | -721.903233 | -721.906772 | -721.904752 | -721.902520 |
| 33 <sup>b</sup> | Gas-phase         | -722.213704 | -722.206228 | -722.206946 | -722.201053 | -722.196502 | -722.197520 | -722.202056 | -722.179117 | -722.184723 | -722.185363 | -722.185191 | -722.184251 |
|                 | CHCl <sub>3</sub> | -722.233879 | -722.229073 | -722.230419 | -722.226834 | -722.220721 | -722.219731 | -722.219256 | -722.201182 | -722.205596 | -722.206925 | -722.206348 | -722.203739 |
|                 | DMSO              | -722.234512 | -722.230540 | -722.232734 | -722.228517 | -722.223393 | -722.221203 | -722.218803 | -722.200990 | -722.203254 | -722.206537 | -722.205584 | -722.204364 |
|                 | EtOH              | -722.236519 | -722.232049 | -722.234430 | -722.230218 | -722.225672 | -722.224049 | -722.220364 | -722.205454 | -722.207764 | -722.211149 | -722.208607 | -722.206817 |

<sup>a</sup> At M06-2X/6-311++G(d,p) level. <sup>b</sup> At B3LYP/6-311++G(d,p) level.

**Table S2.** Solvation free energies ( $\Delta G_{\text{soln}}$ , kcal mol<sup>-1</sup>) in CHCl<sub>3</sub>, DMSO, and C<sub>2</sub>H<sub>5</sub>OH for conformers and tautomers **a-l** of structures **13**, **14**, and **31-33** at the M06-2X/6-311++G(d,p) and B3LYP/6-311++G(d,p) levels of theory.

|                       |                                  | <b>a</b> | <b>b</b> | <b>c</b> | <b>d</b> | <b>e</b> | <b>f</b> | <b>g</b> | <b>h</b> | <b>i</b> | <b>j</b> | <b>k</b> | <b>l</b> |
|-----------------------|----------------------------------|----------|----------|----------|----------|----------|----------|----------|----------|----------|----------|----------|----------|
| <b>13<sup>a</sup></b> | CHCl <sub>3</sub>                | -14.4    | -15.6    | -15.6    | -16.9    | -16.8    | -15.2    | -12.7    | -16.2    | -15.7    | -15.5    | -15.1    | -15.0    |
|                       | DMSO                             | -14.0    | -15.8    | -16.4    | -17.8    | -17.2    | -15.2    | -11.6    | -15.2    | -13.0    | -15.3    | -13.7    | -14.1    |
|                       | C <sub>2</sub> H <sub>5</sub> OH | -13.6    | -17.8    | -17.6    | -20.1    | -18.5    | -17.6    | -11.9    | -18.8    | -15.8    | -17.6    | -16.5    | -16.8    |
| <b>14<sup>a</sup></b> | CHCl <sub>3</sub>                | -17.0    | -18.5    | -21.7    | -18.8    | -18.9    | -18.7    | -16.1    | -18.5    | -19.0    | -18.5    | -18.0    | -17.8    |
|                       | DMSO                             | -16.5    | -18.5    | -19.8    | -19.8    | -19.5    | -17.6    | -16.0    | -17.1    | -17.3    | -18.3    | -16.2    | -15.9    |
|                       | C <sub>2</sub> H <sub>5</sub> OH | -17.4    | -20.2    | -21.7    | -20.9    | -20.9    | -19.0    | -16.2    | -20.9    | -20.0    | -21.4    | -18.8    | -18.7    |
| <b>31<sup>a</sup></b> | CHCl <sub>3</sub>                | -11.1    | -12.4    | -12.8    | -13.7    | -14.1    | -12.3    | -10.0    | -13.0    | -12.4    | -13.1    | -12.1    | -11.7    |
|                       | DMSO                             | -10.1    | -12.8    | -13.0    | -14.5    | -14.8    | -14.1    | -8.1     | -11.3    | -10.4    | -12.2    | -10.6    | -10.6    |
|                       | C <sub>2</sub> H <sub>5</sub> OH | -12.0    | -14.4    | -15.4    | -16.6    | -17.0    | -14.1    | -9.4     | -16.0    | -14.0    | -15.9    | -13.7    | -13.3    |
| <b>32<sup>a</sup></b> | CHCl <sub>3</sub>                | -11.6    | -12.9    | -14.2    | -14.1    | -13.8    | -12.4    | -9.8     | -13.4    | -11.7    | -13.5    | -14.0    | -12.3    |
|                       | DMSO                             | -11.2    | -12.8    | -15.2    | -15.3    | -15.5    | -12.8    | -8.8     | -12.0    | -10.9    | -13.7    | -12.6    | -11.9    |
|                       | C <sub>2</sub> H <sub>5</sub> OH | -13.1    | -15.5    | -17.3    | -17.5    | -18.1    | -15.2    | -10.2    | -16.4    | -14.8    | -16.9    | -15.6    | -15.2    |
| <b>32<sup>b</sup></b> | CHCl <sub>3</sub>                | -11.1    | -13.3    | -13.9    | -14.2    | -14.5    | -12.3    | -9.4     | -12.5    | -12.0    | -13.1    | -12.6    | -11.7    |
|                       | DMSO                             | -10.5    | -13.4    | -14.8    | -15.2    | -15.1    | -12.6    | -7.9     | -11.6    | -10.1    | -12.3    | -11.4    | -11.2    |
|                       | C <sub>2</sub> H <sub>5</sub> OH | -13.2    | -16.0    | -17.2    | -17.3    | -17.6    | -14.9    | -9.3     | -15.3    | -14.0    | -16.2    | -14.3    | -14.3    |
| <b>33<sup>a</sup></b> | CHCl <sub>3</sub>                | -12.7    | -14.8    | -15.1    | -15.1    | -15.4    | -14.0    | -10.9    | -14.2    | -13.3    | -13.6    | -13.9    | -12.5    |
|                       | DMSO                             | -13.0    | -15.4    | -16.0    | -17.8    | -17.1    | -14.9    | -10.5    | -14.3    | -12.3    | -13.1    | -13.8    | -13.2    |
|                       | C <sub>2</sub> H <sub>5</sub> OH | -14.0    | -16.3    | -16.8    | -17.3    | -18.1    | -16.3    | -10.8    | -17.6    | -14.8    | -16.3    | -15.5    | -14.6    |
| <b>33<sup>b</sup></b> | CHCl <sub>3</sub>                | -12.7    | -14.3    | -14.7    | -16.2    | -15.2    | -13.9    | -10.8    | -13.8    | -13.1    | -13.5    | -13.3    | -12.2    |
|                       | DMSO                             | -13.1    | -15.3    | -16.2    | -17.2    | -16.9    | -14.9    | -10.5    | -13.7    | -11.6    | -13.3    | -12.8    | -12.6    |
|                       | C <sub>2</sub> H <sub>5</sub> OH | -14.3    | -16.2    | -17.2    | -18.3    | -18.3    | -16.6    | -11.5    | -16.5    | -14.5    | -16.2    | -14.7    | -14.2    |

<sup>a</sup>M06-2X/6-311++G(d,p). <sup>b</sup>B3LYP/6-311++G(d,p).

**Table S3.** Selected geometric and delocalization parameters for isomers **31a-l**

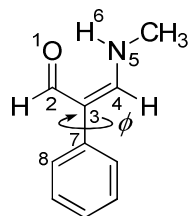

| Medium     | Bond distances (Å)             |                                |                                |                                |                                |                                |                                | $\phi$ (°) | $Q$    | $\langle \lambda \rangle$ | HOMA index |
|------------|--------------------------------|--------------------------------|--------------------------------|--------------------------------|--------------------------------|--------------------------------|--------------------------------|------------|--------|---------------------------|------------|
|            | O <sub>1</sub> -C <sub>2</sub> | C <sub>2</sub> -C <sub>3</sub> | C <sub>3</sub> -C <sub>4</sub> | C <sub>4</sub> -N <sub>5</sub> | O <sub>1</sub> -N <sub>5</sub> | O <sub>1</sub> -H <sub>6</sub> | N <sub>5</sub> -H <sub>6</sub> |            |        |                           |            |
| <b>31a</b> | 1.227                          | 1.444                          | 1.377                          | 1.334                          | 2.682                          | 1.910                          | 1.017                          | 43.58      | 0.174  | 0.333                     | 0.93       |
| <b>31b</b> | 1.213                          | 1.464                          | 1.362                          | 1.347                          | 4.136                          | 4.738                          | 1.011                          | 49.00      | 0.236  | 0.262                     | 0.82       |
| <b>31c</b> | 1.210                          | 1.460                          | 1.361                          | 1.351                          | 4.778                          | 5.004                          | 1.011                          | 45.81      | 0.240  | 0.256                     | 0.82       |
| <b>31d</b> | 1.210                          | 1.460                          | 1.365                          | 1.355                          | 4.185                          | 3.845                          | 1.007                          | 40.42      | 0.240  | 0.257                     | 0.82       |
| <b>31e</b> | 1.212                          | 1.464                          | 1.368                          | 1.355                          | 4.291                          | 5.269                          | 1.005                          | 40.44      | 0.239  | 0.260                     | 0.82       |
| <b>31f</b> | 1.216                          | 1.461                          | 1.372                          | 1.344                          | 3.051                          | 3.981                          | 1.006                          | 36.37      | 0.217  | 0.285                     | 0.85       |
| <b>31g</b> | 1.319                          | 1.360                          | 1.455                          | 1.280                          | 2.579                          | 1.002                          | 1.683                          | 43.06      | -0.134 | 0.316                     | 0.57       |
| <b>31h</b> | 1.346                          | 1.343                          | 1.475                          | 1.266                          | 2.835                          | 0.959                          | 3.771                          | 41.51      | -0.212 | 0.231                     | 0.22       |
| <b>31i</b> | 1.353                          | 1.341                          | 1.479                          | 1.266                          | 4.168                          | 0.959                          | 4.560                          | 37.84      | -0.225 | 0.218                     | 0.13       |
| <b>31j</b> | 1.353                          | 1.343                          | 1.470                          | 1.265                          | 4.772                          | 0.959                          | 5.470                          | 44.08      | -0.215 | 0.227                     | 0.17       |
| <b>31k</b> | 1.359                          | 1.342                          | 1.471                          | 1.267                          | 4.064                          | 0.959                          | 5.005                          | 46.17      | -0.221 | 0.222                     | 0.11       |
| <b>31l</b> | 1.350                          | 1.347                          | 1.467                          | 1.266                          | 4.214                          | 0.961                          | 3.764                          | 46.87      | -0.204 | 0.240                     | 0.22       |
| <b>31a</b> | 1.235                          | 1.435                          | 1.386                          | 1.326                          | 2.704                          | 1.948                          | 1.017                          | 41.45      | 0.140  | 0.372                     | 0.96       |
| <b>31b</b> | 1.224                          | 1.450                          | 1.374                          | 1.333                          | 4.138                          | 4.755                          | 1.013                          | 48.04      | 0.185  | 0.320                     | 0.91       |
| <b>31c</b> | 1.221                          | 1.445                          | 1.373                          | 1.335                          | 4.773                          | 5.028                          | 1.012                          | 47.98      | 0.186  | 0.317                     | 0.91       |
| <b>31d</b> | 1.221                          | 1.446                          | 1.378                          | 1.339                          | 4.195                          | 3.877                          | 1.010                          | 40.97      | 0.186  | 0.318                     | 0.91       |
| <b>31e</b> | 1.222                          | 1.451                          | 1.379                          | 1.340                          | 4.297                          | 5.280                          | 1.009                          | 41.34      | 0.190  | 0.315                     | 0.90       |
| <b>31f</b> | 1.224                          | 1.451                          | 1.381                          | 1.335                          | 3.060                          | 3.989                          | 1.009                          | 34.12      | 0.181  | 0.326                     | 0.91       |
| <b>31g</b> | 1.324                          | 1.359                          | 1.458                          | 1.280                          | 2.558                          | 1.009                          | 1.649                          | 40.66      | -0.143 | 0.307                     | 0.52       |
| <b>31h</b> | 1.344                          | 1.345                          | 1.474                          | 1.269                          | 2.855                          | 0.964                          | 3.799                          | 39.09      | -0.204 | 0.240                     | 0.25       |
| <b>31i</b> | 1.348                          | 1.343                          | 1.478                          | 1.268                          | 4.186                          | 0.964                          | 4.590                          | 37.00      | -0.215 | 0.229                     | 0.19       |
| <b>31j</b> | 1.347                          | 1.345                          | 1.468                          | 1.268                          | 4.678                          | 0.964                          | 5.471                          | 46.95      | -0.202 | 0.241                     | 0.24       |
| <b>31k</b> | 1.353                          | 1.345                          | 1.469                          | 1.269                          | 4.064                          | 0.963                          | 5.015                          | 46.67      | -0.208 | 0.236                     | 0.19       |
| <b>31l</b> | 1.348                          | 1.348                          | 1.468                          | 1.269                          | 4.215                          | 0.965                          | 3.778                          | 47.33      | -0.199 | 0.246                     | 0.24       |
| <b>31a</b> | 1.235                          | 1.434                          | 1.389                          | 1.323                          | 2.713                          | 1.961                          | 1.016                          | 37.20      | 0.133  | 0.380                     | 0.96       |
| <b>31b</b> | 1.225                          | 1.447                          | 1.378                          | 1.328                          | 4.140                          | 4.764                          | 1.013                          | 45.87      | 0.172  | 0.335                     | 0.92       |
| <b>31c</b> | 1.224                          | 1.442                          | 1.377                          | 1.330                          | 4.774                          | 5.037                          | 1.013                          | 48.38      | 0.171  | 0.335                     | 0.93       |
| <b>31d</b> | 1.224                          | 1.443                          | 1.383                          | 1.332                          | 4.199                          | 3.883                          | 1.012                          | 41.48      | 0.168  | 0.339                     | 0.93       |
| <b>31e</b> | 1.225                          | 1.449                          | 1.383                          | 1.334                          | 4.320                          | 5.304                          | 1.010                          | 42.84      | 0.175  | 0.332                     | 0.92       |
| <b>31f</b> | 1.233                          | 1.440                          | 1.388                          | 1.328                          | 3.054                          | 3.980                          | 1.011                          | 33.46      | 0.147  | 0.365                     | 0.95       |
| <b>31g</b> | 1.322                          | 1.361                          | 1.458                          | 1.281                          | 2.542                          | 1.014                          | 1.621                          | 37.14      | -0.138 | 0.313                     | 0.54       |
| <b>31h</b> | 1.345                          | 1.345                          | 1.475                          | 1.269                          | 2.900                          | 0.965                          | 3.847                          | 36.21      | -0.206 | 0.238                     | 0.24       |
| <b>31i</b> | 1.348                          | 1.344                          | 1.478                          | 1.269                          | 4.191                          | 0.965                          | 4.599                          | 37.27      | -0.213 | 0.232                     | 0.20       |
| <b>31j</b> | 1.346                          | 1.345                          | 1.466                          | 1.270                          | 4.762                          | 0.965                          | 5.469                          | 51.68      | -0.197 | 0.247                     | 0.27       |
| <b>31k</b> | 1.350                          | 1.346                          | 1.468                          | 1.271                          | 4.061                          | 0.965                          | 5.014                          | 46.13      | -0.201 | 0.244                     | 0.23       |
| <b>31l</b> | 1.346                          | 1.349                          | 1.468                          | 1.270                          | 4.212                          | 0.966                          | 3.767                          | 47.29      | -0.195 | 0.250                     | 0.27       |
| <b>31a</b> | 1.243                          | 1.426                          | 1.392                          | 1.321                          | 2.721                          | 1.974                          | 1.016                          | 39.99      | 0.112  | 0.405                     | 0.97       |
| <b>31b</b> | 1.235                          | 1.436                          | 1.382                          | 1.324                          | 4.139                          | 4.759                          | 1.014                          | 47.64      | 0.143  | 0.369                     | 0.95       |
| <b>31c</b> | 1.234                          | 1.431                          | 1.381                          | 1.326                          | 4.769                          | 5.024                          | 1.013                          | 51.61      | 0.142  | 0.369                     | 0.96       |
| <b>31d</b> | 1.233                          | 1.433                          | 1.387                          | 1.328                          | 4.203                          | 3.890                          | 1.012                          | 43.16      | 0.141  | 0.370                     | 0.96       |
| <b>31e</b> | 1.234                          | 1.439                          | 1.386                          | 1.331                          | 4.321                          | 5.306                          | 1.010                          | 45.67      | 0.150  | 0.361                     | 0.95       |
| <b>31f</b> | 1.233                          | 1.440                          | 1.388                          | 1.328                          | 3.054                          | 3.980                          | 1.011                          | 33.46      | 0.147  | 0.365                     | 0.95       |
| <b>31g</b> | 1.329                          | 1.358                          | 1.460                          | 1.280                          | 2.552                          | 1.012                          | 1.638                          | 38.05      | -0.151 | 0.299                     | 0.48       |
| <b>31h</b> | 1.345                          | 1.346                          | 1.473                          | 1.270                          | 2.865                          | 0.965                          | 3.813                          | 39.24      | -0.202 | 0.243                     | 0.25       |
| <b>31i</b> | 1.349                          | 1.344                          | 1.477                          | 1.270                          | 4.205                          | 0.965                          | 4.623                          | 40.05      | -0.212 | 0.233                     | 0.20       |
| <b>31j</b> | 1.347                          | 1.345                          | 1.465                          | 1.270                          | 4.764                          | 0.965                          | 5.476                          | 53.69      | -0.197 | 0.247                     | 0.26       |
| <b>31k</b> | 1.351                          | 1.346                          | 1.468                          | 1.271                          | 4.063                          | 0.964                          | 5.016                          | 46.92      | -0.202 | 0.243                     | 0.22       |
| <b>31l</b> | 1.349                          | 1.348                          | 1.468                          | 1.271                          | 4.218                          | 0.966                          | 3.790                          | 48.14      | -0.198 | 0.248                     | 0.24       |



**Table S4.** Selected geometric and delocalization parameters for isomers **32a-1**

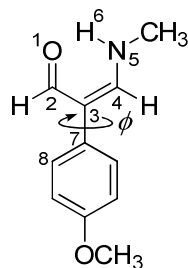

| Medium | Bond distances (Å)             |                                |                                |                                |                                |                                |                                | $\phi$ (°) | $Q$    | $\langle \lambda \rangle$ | HOMA index |
|--------|--------------------------------|--------------------------------|--------------------------------|--------------------------------|--------------------------------|--------------------------------|--------------------------------|------------|--------|---------------------------|------------|
|        | O <sub>1</sub> -C <sub>2</sub> | C <sub>2</sub> -C <sub>3</sub> | C <sub>3</sub> -C <sub>4</sub> | C <sub>4</sub> -N <sub>5</sub> | O <sub>1</sub> -N <sub>5</sub> | O <sub>1</sub> -H <sub>6</sub> | N <sub>5</sub> -H <sub>6</sub> |            |        |                           |            |
| 32a    | 1.227                          | 1.444                          | 1.376                          | 1.335                          | 2.683                          | 1.912                          | 1.017                          | 45.65      | 0.176  | 0.331                     | 0.93       |
| 32b    | 1.214                          | 1.464                          | 1.361                          | 1.348                          | 4.141                          | 4.738                          | 1.011                          | 50.71      | 0.237  | 0.261                     | 0.82       |
| 32c    | 1.210                          | 1.460                          | 1.361                          | 1.353                          | 4.777                          | 4.998                          | 1.011                          | 45.47      | 0.242  | 0.254                     | 0.82       |
| 32d    | 1.211                          | 1.460                          | 1.365                          | 1.358                          | 4.183                          | 3.838                          | 1.007                          | 40.26      | 0.242  | 0.255                     | 0.82       |
| 32e    | 1.212                          | 1.464                          | 1.367                          | 1.356                          | 4.286                          | 5.264                          | 1.005                          | 39.68      | 0.241  | 0.258                     | 0.81       |
| 32f    | 1.216                          | 1.461                          | 1.371                          | 1.345                          | 3.055                          | 3.986                          | 1.006                          | 37.82      | 0.219  | 0.282                     | 0.85       |
| 32g    | 1.321                          | 1.359                          | 1.456                          | 1.279                          | 2.583                          | 1.000                          | 1.690                          | 45.36      | -0.139 | 0.311                     | 0.55       |
| 32h    | 1.348                          | 1.343                          | 1.475                          | 1.266                          | 2.837                          | 0.959                          | 3.770                          | 44.13      | -0.214 | 0.229                     | 0.20       |
| 32i    | 1.355                          | 1.340                          | 1.479                          | 1.266                          | 4.172                          | 0.959                          | 4.564                          | 36.14      | -0.228 | 0.215                     | 0.11       |
| 32j    | 1.354                          | 1.343                          | 1.470                          | 1.265                          | 4.772                          | 0.959                          | 5.470                          | 43.60      | -0.216 | 0.226                     | 0.16       |
| 32k    | 1.361                          | 1.342                          | 1.471                          | 1.268                          | 4.061                          | 0.959                          | 5.003                          | 44.76      | -0.222 | 0.222                     | 0.09       |
| 32l    | 1.351                          | 1.347                          | 1.467                          | 1.266                          | 4.216                          | 0.961                          | 3.766                          | 46.18      | -0.205 | 0.239                     | 0.21       |
| 32a    | 1.235                          | 1.434                          | 1.385                          | 1.327                          | 2.704                          | 1.948                          | 1.017                          | 42.38      | 0.141  | 0.371                     | 0.96       |
| 32b    | 1.225                          | 1.449                          | 1.374                          | 1.333                          | 4.138                          | 4.752                          | 1.012                          | 48.96      | 0.183  | 0.323                     | 0.91       |
| 32c    | 1.222                          | 1.445                          | 1.373                          | 1.336                          | 4.772                          | 5.021                          | 1.012                          | 48.65      | 0.186  | 0.318                     | 0.91       |
| 32d    | 1.222                          | 1.446                          | 1.378                          | 1.340                          | 4.180                          | 3.851                          | 1.010                          | 38.99      | 0.186  | 0.319                     | 0.91       |
| 32e    | 1.223                          | 1.450                          | 1.378                          | 1.341                          | 4.295                          | 5.278                          | 1.008                          | 41.84      | 0.190  | 0.315                     | 0.90       |
| 32f    | 1.224                          | 1.451                          | 1.380                          | 1.337                          | 3.065                          | 3.997                          | 1.009                          | 36.13      | 0.184  | 0.322                     | 0.91       |
| 32g    | 1.326                          | 1.359                          | 1.458                          | 1.280                          | 2.562                          | 1.007                          | 1.654                          | 42.02      | -0.145 | 0.305                     | 0.51       |
| 32h    | 1.346                          | 1.345                          | 1.475                          | 1.269                          | 2.867                          | 0.964                          | 3.810                          | 40.14      | -0.207 | 0.237                     | 0.23       |
| 32i    | 1.350                          | 1.343                          | 1.478                          | 1.269                          | 4.189                          | 0.963                          | 4.594                          | 36.03      | -0.216 | 0.228                     | 0.18       |
| 32j    | 1.349                          | 1.345                          | 1.468                          | 1.268                          | 4.767                          | 0.964                          | 5.471                          | 46.99      | -0.204 | 0.240                     | 0.22       |
| 32k    | 1.354                          | 1.345                          | 1.469                          | 1.270                          | 4.061                          | 0.963                          | 5.011                          | 45.99      | -0.208 | 0.237                     | 0.18       |
| 32l    | 1.349                          | 1.348                          | 1.468                          | 1.269                          | 4.215                          | 0.965                          | 3.773                          | 47.87      | -0.200 | 0.245                     | 0.23       |
| 32a    | 1.236                          | 1.433                          | 1.388                          | 1.325                          | 2.718                          | 1.969                          | 1.016                          | 41.05      | 0.134  | 0.379                     | 0.96       |
| 32b    | 1.226                          | 1.447                          | 1.377                          | 1.329                          | 4.142                          | 4.761                          | 1.013                          | 47.78      | 0.173  | 0.334                     | 0.92       |
| 32c    | 1.225                          | 1.440                          | 1.377                          | 1.330                          | 4.770                          | 5.022                          | 1.013                          | 50.28      | 0.168  | 0.338                     | 0.93       |
| 32d    | 1.225                          | 1.442                          | 1.382                          | 1.334                          | 4.182                          | 3.851                          | 1.011                          | 41.81      | 0.169  | 0.338                     | 0.93       |
| 32e    | 1.226                          | 1.448                          | 1.383                          | 1.336                          | 4.315                          | 5.300                          | 1.010                          | 42.52      | 0.175  | 0.333                     | 0.92       |
| 32f    | 1.225                          | 1.449                          | 1.382                          | 1.334                          | 3.072                          | 4.008                          | 1.010                          | 34.38      | 0.176  | 0.331                     | 0.91       |
| 32g    | 1.325                          | 1.359                          | 1.459                          | 1.281                          | 2.551                          | 1.011                          | 1.636                          | 40.24      | -0.144 | 0.306                     | 0.51       |
| 32h    | 1.347                          | 1.345                          | 1.476                          | 1.269                          | 2.910                          | 0.964                          | 3.856                          | 37.27      | -0.209 | 0.236                     | 0.22       |
| 32i    | 1.350                          | 1.343                          | 1.478                          | 1.269                          | 4.191                          | 0.964                          | 4.601                          | 35.77      | -0.216 | 0.228                     | 0.18       |
| 32j    | 1.347                          | 1.345                          | 1.466                          | 1.270                          | 4.761                          | 0.965                          | 5.469                          | 51.98      | -0.198 | 0.246                     | 0.26       |
| 32k    | 1.352                          | 1.346                          | 1.469                          | 1.271                          | 4.057                          | 0.964                          | 5.010                          | 46.81      | -0.204 | 0.241                     | 0.21       |
| 32l    | 1.347                          | 1.348                          | 1.468                          | 1.270                          | 4.204                          | 0.966                          | 3.754                          | 47.93      | -0.197 | 0.248                     | 0.26       |
| 32a    | 1.243                          | 1.425                          | 1.391                          | 1.322                          | 2.721                          | 1.977                          | 1.016                          | 42.14      | 0.113  | 0.403                     | 0.98       |
| 32b    | 1.236                          | 1.435                          | 1.381                          | 1.325                          | 4.140                          | 4.755                          | 1.014                          | 49.21      | 0.143  | 0.369                     | 0.96       |
| 32c    | 1.235                          | 1.429                          | 1.381                          | 1.326                          | 4.764                          | 5.007                          | 1.014                          | 53.55      | 0.139  | 0.372                     | 0.97       |
| 32d    | 1.233                          | 1.432                          | 1.386                          | 1.330                          | 4.188                          | 3.862                          | 1.012                          | 44.44      | 0.143  | 0.368                     | 0.96       |
| 32e    | 1.234                          | 1.438                          | 1.386                          | 1.332                          | 4.315                          | 5.300                          | 1.010                          | 45.30      | 0.150  | 0.361                     | 0.95       |
| 32f    | 1.233                          | 1.439                          | 1.387                          | 1.330                          | 3.060                          | 3.988                          | 1.011                          | 34.82      | 0.149  | 0.362                     | 0.95       |
| 32g    | 1.331                          | 1.357                          | 1.460                          | 1.280                          | 2.557                          | 1.011                          | 1.645                          | 40.73      | -0.154 | 0.296                     | 0.46       |
| 32h    | 1.347                          | 1.346                          | 1.473                          | 1.271                          | 2.872                          | 0.965                          | 3.821                          | 40.43      | -0.203 | 0.242                     | 0.24       |
| 32i    | 1.350                          | 1.343                          | 1.477                          | 1.270                          | 4.204                          | 0.965                          | 4.620                          | 37.87      | -0.214 | 0.231                     | 0.19       |
| 32j    | 1.348                          | 1.345                          | 1.465                          | 1.271                          | 4.763                          | 0.965                          | 5.477                          | 53.72      | -0.197 | 0.247                     | 0.25       |
| 32k    | 1.353                          | 1.346                          | 1.468                          | 1.271                          | 4.064                          | 0.964                          | 5.017                          | 48.58      | -0.204 | 0.241                     | 0.20       |
| 32l    | 1.350                          | 1.348                          | 1.468                          | 1.271                          | 4.211                          | 0.966                          | 3.775                          | 49.03      | -0.199 | 0.247                     | 0.23       |

**Table S5.** Selected geometric and delocalization parameters for isomers **33a-l**

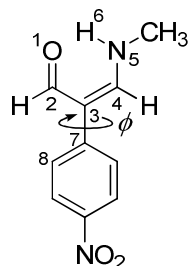

| Medium | Bond distances (Å)             |                                |                                |                                |                                |                                |                                | $\phi$ (°) | $Q$    | $\langle \lambda \rangle$ | HOMA index |
|--------|--------------------------------|--------------------------------|--------------------------------|--------------------------------|--------------------------------|--------------------------------|--------------------------------|------------|--------|---------------------------|------------|
|        | O <sub>1</sub> -C <sub>2</sub> | C <sub>2</sub> -C <sub>3</sub> | C <sub>3</sub> -C <sub>4</sub> | C <sub>4</sub> -N <sub>5</sub> | O <sub>1</sub> -N <sub>5</sub> | O <sub>1</sub> -H <sub>6</sub> | N <sub>5</sub> -H <sub>6</sub> |            |        |                           |            |
| 33a    | 1.225                          | 1.446                          | 1.381                          | 1.329                          | 2.675                          | 1.900                          | 1.019                          | 38.92      | 0.169  | 0.338                     | 0.92       |
| 33b    | 1.212                          | 1.467                          | 1.366                          | 1.342                          | 4.118                          | 4.736                          | 1.011                          | 44.29      | 0.231  | 0.268                     | 0.82       |
| 33c    | 1.209                          | 1.461                          | 1.364                          | 1.347                          | 4.779                          | 5.020                          | 1.011                          | 42.63      | 0.235  | 0.261                     | 0.82       |
| 33d    | 1.210                          | 1.460                          | 1.369                          | 1.349                          | 4.182                          | 3.846                          | 1.008                          | 37.10      | 0.230  | 0.268                     | 0.83       |
| 33e    | 1.211                          | 1.465                          | 1.370                          | 1.350                          | 4.292                          | 5.270                          | 1.006                          | 37.59      | 0.234  | 0.265                     | 0.82       |
| 33f    | 1.214                          | 1.462                          | 1.376                          | 1.339                          | 3.046                          | 3.968                          | 1.007                          | 32.67      | 0.211  | 0.291                     | 0.85       |
| 33g    | 1.313                          | 1.363                          | 1.456                          | 1.278                          | 2.562                          | 1.007                          | 1.660                          | 39.32      | -0.128 | 0.323                     | 0.60       |
| 33h    | 1.342                          | 1.345                          | 1.477                          | 1.264                          | 2.843                          | 0.960                          | 3.773                          | 38.33      | -0.210 | 0.233                     | 0.24       |
| 33i    | 1.349                          | 1.342                          | 1.480                          | 1.265                          | 4.161                          | 0.960                          | 4.557                          | 36.25      | -0.222 | 0.221                     | 0.16       |
| 33j    | 1.350                          | 1.343                          | 1.471                          | 1.264                          | 4.767                          | 0.960                          | 5.474                          | 43.46      | -0.214 | 0.228                     | 0.19       |
| 33k    | 1.354                          | 1.343                          | 1.472                          | 1.267                          | 4.063                          | 0.959                          | 5.007                          | 44.07      | -0.216 | 0.630                     | 0.16       |
| 33l    | 1.345                          | 1.348                          | 1.468                          | 1.265                          | 4.218                          | 0.961                          | 3.776                          | 45.00      | -0.200 | 0.243                     | 0.26       |
| 33a    | 1.232                          | 1.437                          | 1.391                          | 1.321                          | 2.694                          | 1.931                          | 1.018                          | 35.56      | 0.135  | 0.377                     | 0.95       |
| 33b    | 1.222                          | 1.452                          | 1.379                          | 1.327                          | 4.117                          | 4.750                          | 1.012                          | 42.57      | 0.178  | 0.328                     | 0.90       |
| 33c    | 1.220                          | 1.447                          | 1.377                          | 1.331                          | 4.776                          | 5.045                          | 1.012                          | 43.84      | 0.181  | 0.323                     | 0.91       |
| 33d    | 1.220                          | 1.448                          | 1.383                          | 1.331                          | 4.167                          | 3.830                          | 1.011                          | 33.43      | 0.176  | 0.330                     | 0.91       |
| 33e    | 1.221                          | 1.452                          | 1.383                          | 1.335                          | 4.291                          | 5.274                          | 1.009                          | 36.34      | 0.183  | 0.323                     | 0.90       |
| 33f    | 1.222                          | 1.453                          | 1.386                          | 1.329                          | 3.052                          | 3.974                          | 1.010                          | 29.61      | 0.174  | 0.333                     | 0.90       |
| 33g    | 1.316                          | 1.364                          | 1.459                          | 1.279                          | 2.538                          | 1.016                          | 1.619                          | 35.91      | -0.132 | 0.319                     | 0.58       |
| 33h    | 1.339                          | 1.348                          | 1.476                          | 1.267                          | 2.854                          | 0.964                          | 3.794                          | 35.50      | -0.200 | 0.245                     | 0.29       |
| 33i    | 1.343                          | 1.345                          | 1.479                          | 1.267                          | 4.176                          | 0.964                          | 4.585                          | 35.85      | -0.210 | 0.234                     | 0.24       |
| 33j    | 1.344                          | 1.346                          | 1.468                          | 1.267                          | 4.762                          | 0.964                          | 5.475                          | 46.26      | -0.199 | 0.244                     | 0.27       |
| 33k    | 1.348                          | 1.346                          | 1.470                          | 1.269                          | 4.060                          | 0.964                          | 5.013                          | 43.49      | -0.203 | 0.241                     | 0.23       |
| 33l    | 1.343                          | 1.349                          | 1.469                          | 1.268                          | 4.202                          | 0.965                          | 3.759                          | 43.64      | -0.195 | 0.250                     | 0.28       |
| 33a    | 1.233                          | 1.436                          | 1.394                          | 1.318                          | 2.709                          | 1.953                          | 1.017                          | 34.81      | 0.127  | 0.387                     | 0.95       |
| 33b    | 1.224                          | 1.450                          | 1.383                          | 1.323                          | 4.121                          | 4.759                          | 1.013                          | 43.32      | 0.166  | 0.342                     | 0.91       |
| 33c    | 1.223                          | 1.443                          | 1.382                          | 1.325                          | 4.776                          | 5.050                          | 1.013                          | 45.13      | 0.163  | 0.344                     | 0.93       |
| 33d    | 1.223                          | 1.445                          | 1.389                          | 1.325                          | 4.169                          | 3.833                          | 1.012                          | 32.41      | 0.158  | 0.350                     | 0.92       |
| 33e    | 1.224                          | 1.449                          | 1.388                          | 1.329                          | 4.288                          | 5.273                          | 1.011                          | 35.14      | 0.166  | 0.342                     | 0.92       |
| 33f    | 1.223                          | 1.452                          | 1.390                          | 1.325                          | 3.063                          | 3.988                          | 1.011                          | 27.67      | 0.164  | 0.345                     | 0.91       |
| 33g    | 1.316                          | 1.365                          | 1.459                          | 1.280                          | 2.527                          | 1.020                          | 1.598                          | 34.94      | -0.130 | 0.322                     | 0.58       |
| 33h    | 1.340                          | 1.348                          | 1.476                          | 1.268                          | 2.892                          | 0.965                          | 3.836                          | 33.69      | -0.200 | 0.245                     | 0.28       |
| 33i    | 1.343                          | 1.346                          | 1.479                          | 1.268                          | 4.179                          | 0.965                          | 4.589                          | 34.88      | -0.208 | 0.237                     | 0.24       |
| 33j    | 1.343                          | 1.346                          | 1.467                          | 1.269                          | 4.760                          | 0.965                          | 5.472                          | 48.18      | -0.195 | 0.249                     | 0.29       |
| 33k    | 1.346                          | 1.347                          | 1.469                          | 1.270                          | 4.058                          | 0.965                          | 5.012                          | 43.12      | -0.198 | 0.247                     | 0.26       |
| 33l    | 1.341                          | 1.350                          | 1.469                          | 1.269                          | 4.206                          | 0.967                          | 3.761                          | 44.52      | -0.191 | 0.254                     | 0.31       |
| 33a    | 1.239                          | 1.430                          | 1.397                          | 1.316                          | 2.711                          | 1.959                          | 1.017                          | 34.97      | 0.110  | 0.406                     | 0.96       |
| 33b    | 1.232                          | 1.440                          | 1.386                          | 1.320                          | 4.119                          | 4.755                          | 1.014                          | 44.88      | 0.142  | 0.370                     | 0.94       |
| 33c    | 1.231                          | 1.434                          | 1.385                          | 1.322                          | 4.772                          | 5.041                          | 1.013                          | 46.64      | 0.140  | 0.371                     | 0.95       |
| 33d    | 1.230                          | 1.437                          | 1.393                          | 1.322                          | 4.171                          | 3.836                          | 1.013                          | 33.80      | 0.136  | 0.376                     | 0.95       |
| 33e    | 1.231                          | 1.441                          | 1.391                          | 1.327                          | 4.294                          | 5.279                          | 1.011                          | 37.59      | 0.146  | 0.365                     | 0.94       |
| 33f    | 1.230                          | 1.443                          | 1.394                          | 1.322                          | 3.045                          | 3.965                          | 1.012                          | 28.06      | 0.141  | 0.371                     | 0.94       |
| 33g    | 1.321                          | 1.362                          | 1.460                          | 1.279                          | 2.535                          | 1.019                          | 1.613                          | 35.34      | -0.140 | 0.311                     | 0.54       |
| 33h    | 1.340                          | 1.349                          | 1.475                          | 1.269                          | 2.863                          | 0.965                          | 3.805                          | 34.86      | -0.197 | 0.248                     | 0.29       |
| 33i    | 1.342                          | 1.347                          | 1.478                          | 1.269                          | 4.191                          | 0.965                          | 4.611                          | 35.65      | -0.204 | 0.241                     | 0.26       |
| 33j    | 1.343                          | 1.347                          | 1.466                          | 1.269                          | 4.762                          | 0.965                          | 5.478                          | 48.21      | -0.193 | 0.251                     | 0.29       |
| 33k    | 1.346                          | 1.348                          | 1.469                          | 1.270                          | 4.056                          | 0.965                          | 5.011                          | 43.54      | -0.197 | 0.248                     | 0.26       |
| 33l    | 1.343                          | 1.350                          | 1.469                          | 1.269                          | 4.195                          | 0.966                          | 3.754                          | 43.43      | -0.193 | 0.252                     | 0.29       |

**Table S6.** Free energy values (hartrees) calculated at M06-2X/6-31++G(d,p) level in gas-phase, chloroform, dimethyl sulfoxide and ethanol for structures **34-36a-f**

| Medium    |                   | a           | b           | c           | d           | e           | f           |
|-----------|-------------------|-------------|-------------|-------------|-------------|-------------|-------------|
| <b>34</b> | Gas-phase         | -536.788463 | -536.779812 | -536.781562 | -536.775614 | -536.771873 | -536.770741 |
|           | CHCl <sub>3</sub> | -536.804881 | -536.798737 | -536.802346 | -536.796137 | -536.792681 | -536.790494 |
|           | DMSO              | -536.800662 | -536.796456 | -536.800112 | -536.793875 | -536.791668 | -536.787683 |
|           | EtOH              | -536.803821 | -536.798835 | -536.802995 | -536.797061 | -536.794475 | -536.790190 |
| <b>35</b> | Gas-phase         | -651.270762 | -651.263207 | -651.263974 | -651.259004 | -651.254176 | -651.253909 |
|           | CHCl <sub>3</sub> | -651.289026 | -651.283763 | -651.285048 | -651.280669 | -651.276914 | -651.274087 |
|           | DMSO              | -651.285530 | -651.281496 | -651.284337 | -651.280238 | -651.276647 | -651.271673 |
|           | EtOH              | -651.288829 | -651.284978 | -651.288077 | -651.283696 | -651.279876 | -651.274913 |
| <b>36</b> | Gas-phase         | -741.282731 | -741.273412 | -741.275243 | -741.270692 | -741.267246 | -741.264650 |
|           | CHCl <sub>3</sub> | -741.302916 | -741.295575 | -741.297297 | -741.294001 | -741.289710 | -741.286462 |
|           | DMSO              | -741.301507 | -741.293327 | -741.297104 | -741.294197 | -741.289549 | -741.285492 |
|           | EtOH              | -741.303289 | -741.295934 | -741.298491 | -741.295676 | -741.291670 | -741.286864 |

**Table S7.** Relative free energies ( $\Delta G$ , kcal/mol)<sup>a</sup> in gas-phase, chloroform, dimethyl sulfoxide and ethanol for **34-36a-f**

| Medium    | a                 | b   | c   | d   | e   | f    |      |
|-----------|-------------------|-----|-----|-----|-----|------|------|
| <b>34</b> | Gas-phase         | 0.0 | 5.4 | 4.3 | 8.1 | 10.4 | 11.1 |
|           | CHCl <sub>3</sub> | 0.0 | 3.9 | 1.6 | 5.5 | 7.7  | 9.0  |
|           | DMSO              | 0.0 | 2.6 | 0.4 | 4.3 | 5.6  | 8.1  |
|           | EtOH              | 0.0 | 3.1 | 0.5 | 4.2 | 5.9  | 8.6  |
| <b>35</b> | Gas-phase         | 0.0 | 4.7 | 4.3 | 7.4 | 10.4 | 10.6 |
|           | CHCl <sub>3</sub> | 0.0 | 3.3 | 2.5 | 5.2 | 7.6  | 9.4  |
|           | DMSO              | 0.0 | 2.5 | 0.8 | 3.3 | 5.6  | 8.7  |
|           | EtOH              | 0.0 | 2.4 | 0.5 | 3.2 | 5.6  | 8.7  |
| <b>36</b> | Gas-phase         | 0.0 | 5.9 | 4.7 | 7.6 | 9.7  | 11.4 |
|           | CHCl <sub>3</sub> | 0.0 | 4.6 | 3.5 | 5.6 | 8.3  | 10.3 |
|           | DMSO              | 0.0 | 5.1 | 2.8 | 4.6 | 7.5  | 10.1 |
|           | EtOH              | 0.0 | 4.6 | 3.0 | 4.8 | 7.3  | 10.3 |

<sup>a</sup> Relative in every case to the free energy of the most stable form

**Table S8.** Selected geometric parameters and delocalization parameters for structures **34a-f**

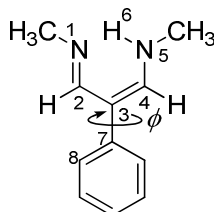

| Medium     |                   | Bond distances (Å)             |                                |                                |                                |                                |                                | $\phi$ (°) | $Q$   | $\langle \lambda \rangle$ | HOMA index |                                |
|------------|-------------------|--------------------------------|--------------------------------|--------------------------------|--------------------------------|--------------------------------|--------------------------------|------------|-------|---------------------------|------------|--------------------------------|
|            |                   | N <sub>1</sub> -C <sub>2</sub> | C <sub>2</sub> -C <sub>3</sub> | C <sub>3</sub> -C <sub>4</sub> | C <sub>4</sub> -N <sub>5</sub> | N <sub>1</sub> -N <sub>5</sub> | N <sub>1</sub> -H <sub>6</sub> |            |       |                           |            | N <sub>5</sub> -H <sub>6</sub> |
| <b>34a</b> | Gas-phase         | 1.281                          | 1.450                          | 1.371                          | 1.341                          | 2.723                          | 1.933                          | 1.021      | 40.81 | 0.139                     | 0.344      | 0.85                           |
| <b>34b</b> |                   | 1.269                          | 1.470                          | 1.356                          | 1.362                          | 4.192                          | 4.775                          | 1.011      | 43.68 | 0.207                     | 0.270      | 0.71                           |
| <b>34c</b> |                   | 1.268                          | 1.461                          | 1.355                          | 1.366                          | 4.833                          | 5.023                          | 1.012      | 50.58 | 0.204                     | 0.271      | 0.72                           |
| <b>34d</b> |                   | 1.269                          | 1.462                          | 1.358                          | 1.369                          | 4.224                          | 3.862                          | 1.008      | 42.73 | 0.204                     | 0.273      | 0.72                           |
| <b>34e</b> |                   | 1.270                          | 1.466                          | 1.359                          | 1.370                          | 4.270                          | 5.257                          | 1.005      | 41.20 | 0.207                     | 0.271      | 0.71                           |
| <b>34f</b> |                   | 1.271                          | 1.466                          | 1.360                          | 1.359                          | 3.170                          | 4.151                          | 1.005      | 54.70 | 0.194                     | 0.284      | 0.74                           |
| <b>34a</b> | CHCl <sub>3</sub> | 1.283                          | 1.449                          | 1.376                          | 1.337                          | 2.739                          | 1.960                          | 1.019      | 38.12 | 0.127                     | 0.358      | 0.86                           |
| <b>34b</b> |                   | 1.273                          | 1.467                          | 1.363                          | 1.352                          | 4.205                          | 4.801                          | 1.012      | 41.98 | 0.183                     | 0.297      | 0.76                           |
| <b>34c</b> |                   | 1.273                          | 1.457                          | 1.362                          | 1.355                          | 4.833                          | 5.051                          | 1.012      | 53.66 | 0.177                     | 0.302      | 0.78                           |
| <b>34d</b> |                   | 1.273                          | 1.459                          | 1.365                          | 1.356                          | 4.216                          | 3.868                          | 1.009      | 42.14 | 0.177                     | 0.303      | 0.78                           |
| <b>34e</b> |                   | 1.274                          | 1.462                          | 1.367                          | 1.355                          | 4.319                          | 5.305                          | 1.007      | 42.96 | 0.176                     | 0.305      | 0.78                           |
| <b>34f</b> |                   | 1.273                          | 1.466                          | 1.364                          | 1.356                          | 3.167                          | 4.147                          | 1.008      | 52.27 | 0.185                     | 0.295      | 0.75                           |
| <b>34a</b> | DMSO              | 1.284                          | 1.449                          | 1.378                          | 1.335                          | 2.743                          | 1.970                          | 1.019      | 36.57 | 0.122                     | 0.364      | 0.87                           |
| <b>34b</b> |                   | 1.275                          | 1.465                          | 1.367                          | 1.346                          | 4.207                          | 4.812                          | 1.012      | 41.22 | 0.169                     | 0.312      | 0.78                           |
| <b>34c</b> |                   | 1.276                          | 1.453                          | 1.366                          | 1.348                          | 4.829                          | 5.059                          | 1.012      | 54.23 | 0.159                     | 0.321      | 0.81                           |
| <b>34d</b> |                   | 1.275                          | 1.457                          | 1.370                          | 1.349                          | 4.218                          | 3.880                          | 1.010      | 41.88 | 0.161                     | 0.320      | 0.80                           |
| <b>34e</b> |                   | 1.276                          | 1.460                          | 1.371                          | 1.349                          | 4.327                          | 5.315                          | 1.008      | 43.82 | 0.162                     | 0.320      | 0.80                           |
| <b>34f</b> |                   | 1.274                          | 1.467                          | 1.365                          | 1.355                          | 3.165                          | 4.146                          | 1.009      | 49.20 | 0.183                     | 0.298      | 0.76                           |
| <b>34a</b> | EtOH              | 1.285                          | 1.449                          | 1.378                          | 1.336                          | 2.751                          | 1.979                          | 1.018      | 37.21 | 0.122                     | 0.364      | 0.87                           |
| <b>34b</b> |                   | 1.275                          | 1.465                          | 1.366                          | 1.348                          | 4.217                          | 4.817                          | 1.012      | 41.64 | 0.172                     | 0.309      | 0.78                           |
| <b>34c</b> |                   | 1.276                          | 1.453                          | 1.365                          | 1.350                          | 4.830                          | 5.056                          | 1.012      | 56.55 | 0.162                     | 0.318      | 0.81                           |
| <b>34d</b> |                   | 1.276                          | 1.457                          | 1.368                          | 1.352                          | 4.217                          | 3.876                          | 1.010      | 43.50 | 0.165                     | 0.316      | 0.80                           |
| <b>34e</b> |                   | 1.277                          | 1.460                          | 1.370                          | 1.351                          | 4.325                          | 5.313                          | 1.008      | 45.00 | 0.164                     | 0.318      | 0.80                           |
| <b>34f</b> |                   | 1.274                          | 1.467                          | 1.364                          | 1.357                          | 3.182                          | 4.168                          | 1.009      | 50.06 | 0.186                     | 0.294      | 0.75                           |

**Table S9.** Most significant geometric parameters and delocalization parameters for structures **35a-f** and **36a-f**

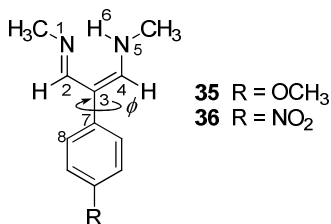

| Medium     | Bond distances (Å)             |                                |                                |                                |                                |                                |                                | $\phi$ (°) | $Q$   | $\langle A \rangle$ | HOMA index |      |
|------------|--------------------------------|--------------------------------|--------------------------------|--------------------------------|--------------------------------|--------------------------------|--------------------------------|------------|-------|---------------------|------------|------|
|            | N <sub>1</sub> -C <sub>2</sub> | C <sub>2</sub> -C <sub>3</sub> | C <sub>3</sub> -C <sub>4</sub> | C <sub>4</sub> -N <sub>5</sub> | N <sub>1</sub> -N <sub>5</sub> | N <sub>1</sub> -H <sub>6</sub> | N <sub>5</sub> -H <sub>6</sub> |            |       |                     |            |      |
| <b>35a</b> | Gas-phase                      | 1.281                          | 1.450                          | 1.369                          | 1.344                          | 2.729                          | 1.941                          | 1.020      | 43.43 | 0.144               | 0.339      | 0.84 |
| <b>35b</b> |                                | 1.269                          | 1.469                          | 1.355                          | 1.364                          | 4.202                          | 4.778                          | 1.011      | 46.86 | 0.209               | 0.267      | 0.71 |
| <b>35c</b> |                                | 1.268                          | 1.461                          | 1.355                          | 1.368                          | 4.834                          | 5.020                          | 1.012      | 49.88 | 0.206               | 0.270      | 0.72 |
| <b>35d</b> |                                | 1.269                          | 1.462                          | 1.357                          | 1.371                          | 4.229                          | 3.864                          | 1.008      | 44.36 | 0.207               | 0.270      | 0.72 |
| <b>35e</b> |                                | 1.270                          | 1.465                          | 1.359                          | 1.371                          | 4.266                          | 5.252                          | 1.005      | 40.49 | 0.207               | 0.271      | 0.71 |
| <b>35f</b> |                                | 1.271                          | 1.466                          | 1.359                          | 1.362                          | 3.177                          | 4.163                          | 1.005      | 57.32 | 0.198               | 0.667      | 0.73 |
| <b>35a</b> | CHCl <sub>3</sub>              | 1.284                          | 1.449                          | 1.374                          | 1.339                          | 2.746                          | 1.972                          | 1.018      | 41.18 | 0.130               | 0.355      | 0.86 |
| <b>35b</b> |                                | 1.273                          | 1.466                          | 1.361                          | 1.354                          | 4.210                          | 4.803                          | 1.012      | 45.43 | 0.186               | 0.293      | 0.75 |
| <b>35c</b> |                                | 1.273                          | 1.457                          | 1.362                          | 1.357                          | 4.834                          | 5.053                          | 1.012      | 53.48 | 0.179               | 0.300      | 0.78 |
| <b>35d</b> |                                | 1.273                          | 1.459                          | 1.364                          | 1.360                          | 4.227                          | 3.877                          | 1.010      | 43.97 | 0.182               | 0.297      | 0.77 |
| <b>35e</b> |                                | 1.274                          | 1.462                          | 1.367                          | 1.358                          | 4.316                          | 5.302                          | 1.007      | 43.26 | 0.179               | 0.302      | 0.77 |
| <b>35f</b> |                                | 1.273                          | 1.466                          | 1.362                          | 1.359                          | 3.174                          | 4.159                          | 1.007      | 54.82 | 0.190               | 0.289      | 0.75 |
| <b>35a</b> | DMSO                           | 1.285                          | 1.449                          | 1.376                          | 1.337                          | 2.751                          | 1.983                          | 1.018      | 39.68 | 0.125               | 0.361      | 0.87 |
| <b>35b</b> |                                | 1.275                          | 1.465                          | 1.365                          | 1.349                          | 4.214                          | 4.816                          | 1.012      | 43.27 | 0.174               | 0.307      | 0.77 |
| <b>35c</b> |                                | 1.276                          | 1.453                          | 1.365                          | 1.350                          | 4.831                          | 5.062                          | 1.012      | 54.41 | 0.162               | 0.318      | 0.81 |
| <b>35d</b> |                                | 1.276                          | 1.457                          | 1.368                          | 1.354                          | 4.227                          | 3.886                          | 1.011      | 44.70 | 0.167               | 0.314      | 0.80 |
| <b>35e</b> |                                | 1.278                          | 1.459                          | 1.371                          | 1.350                          | 4.360                          | 5.345                          | 1.008      | 46.74 | 0.160               | 0.323      | 0.81 |
| <b>35f</b> |                                | 1.274                          | 1.467                          | 1.363                          | 1.359                          | 3.165                          | 4.151                          | 1.009      | 51.22 | 0.189               | 0.291      | 0.75 |
| <b>35a</b> | EtOH                           | 1.285                          | 1.449                          | 1.375                          | 1.338                          | 2.760                          | 1.994                          | 1.018      | 39.99 | 0.127               | 0.358      | 0.87 |
| <b>35b</b> |                                | 1.275                          | 1.465                          | 1.364                          | 1.351                          | 4.221                          | 4.818                          | 1.012      | 44.08 | 0.177               | 0.303      | 0.77 |
| <b>35c</b> |                                | 1.276                          | 1.453                          | 1.364                          | 1.352                          | 4.832                          | 5.056                          | 1.012      | 58.19 | 0.165               | 0.315      | 0.81 |
| <b>35d</b> |                                | 1.276                          | 1.457                          | 1.367                          | 1.356                          | 4.223                          | 3.877                          | 1.011      | 45.49 | 0.170               | 0.311      | 0.80 |
| <b>35e</b> |                                | 1.277                          | 1.460                          | 1.370                          | 1.352                          | 4.328                          | 5.316                          | 1.008      | 45.61 | 0.165               | 0.317      | 0.80 |
| <b>35f</b> |                                | 1.274                          | 1.467                          | 1.362                          | 1.360                          | 3.181                          | 4.171                          | 1.009      | 52.27 | 0.191               | 0.289      | 0.75 |
| <b>36a</b> | Gas-phase                      | 1.280                          | 1.451                          | 1.376                          | 1.335                          | 2.712                          | 1.915                          | 1.022      | 36.14 | 0.130               | 0.355      | 0.85 |
| <b>36b</b> |                                | 1.268                          | 1.471                          | 1.360                          | 1.355                          | 4.174                          | 4.776                          | 1.011      | 40.96 | 0.198               | 0.280      | 0.72 |
| <b>36c</b> |                                | 1.267                          | 1.463                          | 1.358                          | 1.361                          | 4.835                          | 5.048                          | 1.011      | 46.74 | 0.199               | 0.277      | 0.73 |
| <b>36d</b> |                                | 1.268                          | 1.463                          | 1.361                          | 1.361                          | 4.224                          | 3.872                          | 1.007      | 40.32 | 0.195               | 0.282      | 0.74 |
| <b>36e</b> |                                | 1.269                          | 1.466                          | 1.363                          | 1.362                          | 4.288                          | 5.273                          | 1.005      | 38.78 | 0.196               | 0.282      | 0.73 |
| <b>36f</b> |                                | 1.270                          | 1.467                          | 1.364                          | 1.353                          | 3.171                          | 4.147                          | 1.006      | 49.90 | 0.186               | 0.293      | 0.75 |
| <b>36a</b> | CHCl <sub>3</sub>              | 1.282                          | 1.451                          | 1.382                          | 1.329                          | 2.725                          | 1.939                          | 1.021      | 34.10 | 0.116               | 0.371      | 0.86 |
| <b>36b</b> |                                | 1.272                          | 1.468                          | 1.370                          | 1.341                          | 4.168                          | 4.789                          | 1.011      | 35.58 | 0.167               | 0.315      | 0.77 |
| <b>36c</b> |                                | 1.272                          | 1.458                          | 1.366                          | 1.348                          | 4.837                          | 5.086                          | 1.012      | 46.85 | 0.168               | 0.312      | 0.79 |
| <b>36d</b> |                                | 1.272                          | 1.460                          | 1.371                          | 1.346                          | 4.201                          | 3.855                          | 1.010      | 35.83 | 0.163               | 0.318      | 0.79 |
| <b>36e</b> |                                | 1.273                          | 1.463                          | 1.372                          | 1.348                          | 4.313                          | 5.301                          | 1.008      | 38.16 | 0.166               | 0.316      | 0.78 |
| <b>36f</b> |                                | 1.272                          | 1.467                          | 1.369                          | 1.347                          | 3.169                          | 4.142                          | 1.008      | 45.99 | 0.173               | 0.308      | 0.77 |
| <b>36a</b> | DMSO                           | 1.283                          | 1.451                          | 1.385                          | 1.327                          | 2.727                          | 1.945                          | 1.021      | 31.42 | 0.110               | 0.378      | 0.86 |
| <b>36b</b> |                                | 1.274                          | 1.466                          | 1.375                          | 1.335                          | 4.165                          | 4.795                          | 1.012      | 34.34 | 0.152               | 0.332      | 0.79 |
| <b>36c</b> |                                | 1.275                          | 1.455                          | 1.372                          | 1.340                          | 4.834                          | 5.096                          | 1.012      | 47.05 | 0.148               | 0.334      | 0.82 |
| <b>36d</b> |                                | 1.275                          | 1.459                          | 1.377                          | 1.339                          | 4.190                          | 3.842                          | 1.011      | 34.93 | 0.146               | 0.338      | 0.81 |
| <b>36e</b> |                                | 1.275                          | 1.462                          | 1.376                          | 1.342                          | 4.310                          | 5.300                          | 1.009      | 37.08 | 0.153               | 0.330      | 0.80 |
| <b>36f</b> |                                | 1.273                          | 1.469                          | 1.371                          | 1.346                          | 3.166                          | 4.138                          | 1.009      | 41.41 | 0.171               | 0.311      | 0.76 |
| <b>36a</b> | EtOH                           | 1.283                          | 1.451                          | 1.386                          | 1.326                          | 2.732                          | 1.951                          | 1.021      | 30.67 | 0.108               | 0.380      | 0.86 |
| <b>36b</b> |                                | 1.274                          | 1.466                          | 1.376                          | 1.335                          | 4.167                          | 4.795                          | 1.012      | 33.77 | 0.151               | 0.333      | 0.79 |
| <b>36c</b> |                                | 1.275                          | 1.455                          | 1.370                          | 1.342                          | 4.837                          | 5.099                          | 1.012      | 48.70 | 0.152               | 0.330      | 0.82 |
| <b>36d</b> |                                | 1.274                          | 1.459                          | 1.376                          | 1.339                          | 4.179                          | 3.825                          | 1.011      | 34.39 | 0.148               | 0.335      | 0.81 |
| <b>36e</b> |                                | 1.275                          | 1.462                          | 1.376                          | 1.342                          | 4.304                          | 5.294                          | 1.009      | 36.88 | 0.153               | 0.330      | 0.80 |
| <b>36f</b> |                                | 1.273                          | 1.471                          | 1.372                          | 1.345                          | 3.178                          | 4.149                          | 1.009      | 36.85 | 0.171               | 0.312      | 0.76 |

**Table S10.** Free energy values (hartrees) calculated at M06-2X/6-31++G(d,p) level for structures **26a-g** and **28a-g** in gas-phase, chloroform, dimethyl sulfoxide and ethanol

| Medium    |                   | a           | b           | c           | d           | e           | f           | g           |
|-----------|-------------------|-------------|-------------|-------------|-------------|-------------|-------------|-------------|
| <b>26</b> | Gas-phase         | -823.560695 | -823.556530 | -823.557175 | -823.549121 | -823.543214 | -823.541826 | -823.552029 |
|           | CHCl <sub>3</sub> | -823.584504 | -823.583004 | -823.583933 | -823.576647 | -823.569847 | -823.569222 | -823.573457 |
|           | DMSO              | -823.582475 | -823.583004 | -823.583936 | -823.576657 | -823.570422 | -823.568889 | -823.570503 |
|           | EtOH              | -823.584991 | -823.584551 | -823.587485 | -823.580247 | -823.573814 | -823.572602 | -823.572840 |
| <b>28</b> | Gas-phase         | -913.570550 | -913.564277 | -913.565799 | -913.558766 | -913.552792 | -913.551088 | -913.561144 |
|           | CHCl <sub>3</sub> | -913.596805 | -913.591437 | -913.594358 | -913.586867 | -913.581575 | -913.580473 | -913.584766 |
|           | DMSO              | -913.596895 | -913.591352 | -913.597192 | -913.588608 | -913.582328 | -913.580525 | -913.582679 |
|           | EtOH              | -913.596285 | -913.592465 | -913.597192 | -913.589052 | -913.583645 | -913.583445 | -913.582360 |

**Table S11.** Selected geometric parameters and delocalization parameters for isomers **26a-g**

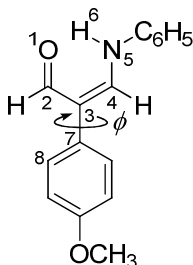

| Medium     | Bond distances (Å)             |                                |                                |                                |                                |                                |                                | $\phi$ (°) | $Q$   | $\langle \lambda \rangle$ | HOMA index |      |
|------------|--------------------------------|--------------------------------|--------------------------------|--------------------------------|--------------------------------|--------------------------------|--------------------------------|------------|-------|---------------------------|------------|------|
|            | O <sub>1</sub> -C <sub>2</sub> | C <sub>2</sub> -C <sub>3</sub> | C <sub>3</sub> -C <sub>4</sub> | C <sub>4</sub> -N <sub>5</sub> | O <sub>1</sub> -N <sub>5</sub> | O <sub>1</sub> -H <sub>6</sub> | N <sub>5</sub> -H <sub>6</sub> |            |       |                           |            |      |
| <b>26a</b> | Gas-phase                      | 1.224                          | 1.451                          | 1.370                          | 1.347                          | 2.684                          | 1.901                          | 1.019      | 45.15 | 0.204                     | 0.300      | 0.89 |
| <b>26b</b> |                                | 1.211                          | 1.469                          | 1.357                          | 1.356                          | 4.147                          | 4.721                          | 1.012      | 52.80 | 0.257                     | 0.239      | 0.78 |
| <b>26c</b> |                                | 1.209                          | 1.463                          | 1.358                          | 1.358                          | 4.761                          | 4.953                          | 1.012      | 48.42 | 0.254                     | 0.759      | 0.79 |
| <b>26d</b> |                                | 1.209                          | 1.464                          | 1.361                          | 1.365                          | 4.163                          | 3.828                          | 1.008      | 44.08 | 0.259                     | 0.763      | 0.78 |
| <b>26e</b> |                                | 1.208                          | 1.475                          | 1.357                          | 1.376                          | 4.173                          | 5.118                          | 1.008      | 37.03 | 0.286                     | 0.210      | 0.71 |
| <b>26f</b> |                                | 1.211                          | 1.466                          | 1.365                          | 1.360                          | 2.996                          | 3.909                          | 1.009      | 40.42 | 0.250                     | 0.752      | 0.80 |
| <b>26g</b> |                                | 1.318                          | 1.363                          | 1.448                          | 1.288                          | 2.580                          | 1.000                          | 1.689      | 44.43 | -0.115                    | 0.338      | 0.62 |
| <b>26a</b> | CHCl <sub>3</sub>              | 1.230                          | 1.445                          | 1.375                          | 1.343                          | 2.695                          | 1.919                          | 1.018      | 42.10 | 0.183                     | 0.324      | 0.92 |
| <b>26b</b> |                                | 1.220                          | 1.459                          | 1.363                          | 1.349                          | 4.152                          | 4.732                          | 1.014      | 52.21 | 0.225                     | 0.276      | 0.85 |
| <b>26c</b> |                                | 1.218                          | 1.452                          | 1.364                          | 1.350                          | 4.761                          | 4.972                          | 1.014      | 51.16 | 0.220                     | 0.720      | 0.87 |
| <b>26d</b> |                                | 1.218                          | 1.455                          | 1.367                          | 1.356                          | 4.170                          | 3.852                          | 1.011      | 45.88 | 0.226                     | 0.725      | 0.86 |
| <b>26e</b> |                                | 1.216                          | 1.462                          | 1.365                          | 1.364                          | 4.195                          | 5.150                          | 1.011      | 38.72 | 0.245                     | 0.255      | 0.81 |
| <b>26f</b> |                                | 1.219                          | 1.457                          | 1.371                          | 1.355                          | 3.014                          | 3.925                          | 1.012      | 38.34 | 0.222                     | 0.720      | 0.86 |
| <b>26g</b> |                                | 1.322                          | 1.362                          | 1.449                          | 1.289                          | 2.569                          | 1.003                          | 1.673      | 43.10 | -0.120                    | 0.333      | 0.59 |
| <b>26a</b> | DMSO                           | 1.230                          | 1.445                          | 1.375                          | 1.343                          | 2.708                          | 1.943                          | 1.018      | 40.89 | 0.183                     | 0.324      | 0.92 |
| <b>26b</b> |                                | 1.220                          | 1.459                          | 1.365                          | 1.347                          | 4.149                          | 4.740                          | 1.015      | 48.58 | 0.221                     | 0.280      | 0.86 |
| <b>26c</b> |                                | 1.220                          | 1.451                          | 1.366                          | 1.348                          | 4.760                          | 4.968                          | 1.015      | 55.92 | 0.213                     | 0.712      | 0.88 |
| <b>26d</b> |                                | 1.220                          | 1.453                          | 1.370                          | 1.351                          | 4.174                          | 3.840                          | 1.012      | 43.00 | 0.214                     | 0.712      | 0.87 |
| <b>26e</b> |                                | 1.219                          | 1.459                          | 1.368                          | 1.359                          | 4.202                          | 5.164                          | 1.012      | 38.39 | 0.231                     | 0.271      | 0.84 |
| <b>26f</b> |                                | 1.220                          | 1.456                          | 1.372                          | 1.353                          | 3.028                          | 3.940                          | 1.013      | 37.10 | 0.217                     | 0.714      | 0.87 |
| <b>26g</b> |                                | 1.322                          | 1.363                          | 1.448                          | 1.290                          | 2.559                          | 1.006                          | 1.655      | 41.70 | -0.117                    | 0.336      | 0.59 |
| <b>26a</b> | EtOH                           | 1.236                          | 1.438                          | 1.378                          | 1.340                          | 2.707                          | 1.945                          | 1.018      | 41.50 | 0.164                     | 0.346      | 0.95 |
| <b>26b</b> |                                | 1.228                          | 1.449                          | 1.369                          | 1.343                          | 4.149                          | 4.736                          | 1.015      | 49.85 | 0.195                     | 0.310      | 0.90 |
| <b>26c</b> |                                | 1.228                          | 1.441                          | 1.369                          | 1.344                          | 4.757                          | 4.972                          | 1.015      | 54.50 | 0.188                     | 0.683      | 0.92 |
| <b>26d</b> |                                | 1.227                          | 1.444                          | 1.373                          | 1.347                          | 4.179                          | 3.852                          | 1.013      | 47.86 | 0.191                     | 0.686      | 0.92 |
| <b>26e</b> |                                | 1.227                          | 1.448                          | 1.373                          | 1.352                          | 4.226                          | 5.194                          | 1.013      | 41.07 | 0.200                     | 0.305      | 0.90 |
| <b>26f</b> |                                | 1.227                          | 1.448                          | 1.376                          | 1.349                          | 3.023                          | 3.935                          | 1.013      | 37.28 | 0.194                     | 0.688      | 0.91 |
| <b>26g</b> |                                | 1.327                          | 1.360                          | 1.450                          | 1.288                          | 2.571                          | 1.004                          | 1.676      | 42.06 | -0.129                    | 0.323      | 0.54 |

**Table S12.** Selected geometric parameters and delocalization parameters for structures **28a-g**

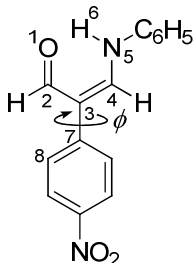

| Medium     | Bond distances (Å)             |                                |                                |                                |                                |                                |                                | $\phi$ (°) | $Q$   | $\langle \lambda \rangle$ | HOMA index |      |
|------------|--------------------------------|--------------------------------|--------------------------------|--------------------------------|--------------------------------|--------------------------------|--------------------------------|------------|-------|---------------------------|------------|------|
|            | O <sub>1</sub> -C <sub>2</sub> | C <sub>2</sub> -C <sub>3</sub> | C <sub>3</sub> -C <sub>4</sub> | C <sub>4</sub> -N <sub>5</sub> | O <sub>1</sub> -N <sub>5</sub> | O <sub>1</sub> -H <sub>6</sub> | N <sub>5</sub> -H <sub>6</sub> |            |       |                           |            |      |
| <b>28a</b> | Gas-phase                      | 1.223                          | 1.451                          | 1.375                          | 1.340                          | 2.679                          | 1.895                          | 1.019      | 40.25 | 0.193                     | 0.312      | 0.90 |
| <b>28b</b> |                                | 1.210                          | 1.471                          | 1.361                          | 1.350                          | 4.128                          | 4.724                          | 1.012      | 46.63 | 0.250                     | 0.247      | 0.79 |
| <b>28c</b> |                                | 1.208                          | 1.464                          | 1.360                          | 1.353                          | 4.766                          | 4.982                          | 1.012      | 45.06 | 0.249                     | 0.754      | 0.80 |
| <b>28d</b> |                                | 1.208                          | 1.464                          | 1.364                          | 1.357                          | 4.173                          | 3.836                          | 1.008      | 41.51 | 0.249                     | 0.753      | 0.80 |
| <b>28e</b> |                                | 1.209                          | 1.474                          | 1.363                          | 1.365                          | 4.196                          | 5.155                          | 1.009      | 33.47 | 0.267                     | 0.230      | 0.75 |
| <b>28f</b> |                                | 1.210                          | 1.467                          | 1.370                          | 1.352                          | 2.997                          | 3.912                          | 1.009      | 35.28 | 0.239                     | 0.740      | 0.81 |
| <b>28g</b> |                                | 1.311                          | 1.366                          | 1.449                          | 1.286                          | 2.564                          | 1.005                          | 1.667      | 39.44 | -0.108                    | 0.345      | 0.66 |
| <b>28a</b> | CHCl <sub>3</sub>              | 1.228                          | 1.446                          | 1.380                          | 1.336                          | 2.693                          | 1.917                          | 1.019      | 39.26 | 0.174                     | 0.334      | 0.92 |
| <b>28b</b> |                                | 1.218                          | 1.461                          | 1.368                          | 1.343                          | 4.127                          | 4.731                          | 1.014      | 43.04 | 0.218                     | 0.283      | 0.85 |
| <b>28c</b> |                                | 1.217                          | 1.454                          | 1.367                          | 1.346                          | 4.766                          | 4.995                          | 1.014      | 47.32 | 0.216                     | 0.716      | 0.87 |
| <b>28d</b> |                                | 1.217                          | 1.455                          | 1.372                          | 1.347                          | 4.172                          | 3.838                          | 1.012      | 40.45 | 0.213                     | 0.712      | 0.87 |
| <b>28e</b> |                                | 1.217                          | 1.462                          | 1.372                          | 1.352                          | 4.212                          | 5.179                          | 1.012      | 33.00 | 0.225                     | 0.277      | 0.84 |
| <b>28f</b> |                                | 1.217                          | 1.459                          | 1.376                          | 1.346                          | 3.016                          | 3.929                          | 1.012      | 32.91 | 0.212                     | 0.709      | 0.86 |
| <b>28g</b> |                                | 1.314                          | 1.366                          | 1.450                          | 1.287                          | 2.551                          | 1.009                          | 1.645      | 37.00 | -0.111                    | 0.343      | 0.64 |
| <b>28a</b> | DMSO                           | 1.229                          | 1.446                          | 1.381                          | 1.335                          | 2.705                          | 1.933                          | 1.019      | 37.10 | 0.171                     | 0.337      | 0.93 |
| <b>28b</b> |                                | 1.219                          | 1.460                          | 1.370                          | 1.341                          | 4.128                          | 4.734                          | 1.015      | 41.97 | 0.212                     | 0.290      | 0.86 |
| <b>28c</b> |                                | 1.226                          | 1.444                          | 1.372                          | 1.339                          | 4.763                          | 4.997                          | 1.015      | 49.02 | 0.185                     | 0.680      | 0.92 |
| <b>28d</b> |                                | 1.219                          | 1.453                          | 1.375                          | 1.343                          | 4.172                          | 3.838                          | 1.013      | 39.80 | 0.202                     | 0.699      | 0.89 |
| <b>28e</b> |                                | 1.218                          | 1.459                          | 1.376                          | 1.348                          | 4.201                          | 5.172                          | 1.013      | 32.57 | 0.213                     | 0.290      | 0.86 |
| <b>28f</b> |                                | 1.219                          | 1.457                          | 1.378                          | 1.345                          | 3.025                          | 3.939                          | 1.014      | 31.23 | 0.205                     | 0.701      | 0.87 |
| <b>28g</b> |                                | 1.314                          | 1.368                          | 1.449                          | 1.289                          | 2.538                          | 1.013                          | 1.623      | 35.07 | -0.106                    | 0.348      | 0.65 |
| <b>28a</b> | EtOH                           | 1.234                          | 1.440                          | 1.384                          | 1.333                          | 2.705                          | 1.935                          | 1.019      | 36.67 | 0.155                     | 0.356      | 0.95 |
| <b>28b</b> |                                | 1.226                          | 1.451                          | 1.373                          | 1.337                          | 4.130                          | 4.735                          | 1.016      | 42.83 | 0.189                     | 0.317      | 0.90 |
| <b>28c</b> |                                | 1.226                          | 1.444                          | 1.372                          | 1.339                          | 4.763                          | 4.997                          | 1.015      | 49.02 | 0.185                     | 0.680      | 0.92 |
| <b>28d</b> |                                | 1.225                          | 1.446                          | 1.378                          | 1.340                          | 4.178                          | 3.848                          | 1.013      | 41.69 | 0.183                     | 0.677      | 0.92 |
| <b>28e</b> |                                | 1.225                          | 1.451                          | 1.379                          | 1.344                          | 4.221                          | 5.195                          | 1.013      | 33.93 | 0.191                     | 0.315      | 0.90 |
| <b>28f</b> |                                | 1.225                          | 1.450                          | 1.382                          | 1.341                          | 3.023                          | 3.939                          | 1.014      | 31.44 | 0.184                     | 0.677      | 0.91 |
| <b>28g</b> |                                | 1.318                          | 1.365                          | 1.451                          | 1.287                          | 2.551                          | 1.010                          | 1.645      | 35.26 | -0.117                    | 0.336      | 0.61 |

**Table S13.** Free energy values (hartrees) calculated at M06-2X/6-31++G(d,p) level for structures **27a-g**, **29a-g**, **37a-g** and **39a-g** in gas-phase, chloroform, dimethyl sulfoxide and ethanol

| <b>Medium</b> |                   | <b>a</b>     | <b>b</b>     | <b>c</b>     | <b>d</b>     | <b>g</b>     |
|---------------|-------------------|--------------|--------------|--------------|--------------|--------------|
| <b>27</b>     | Gas-phase         | -938.042538  | -938.038806  | -938.039095  | -938.030099  | -938.035698  |
|               | CHCl <sub>3</sub> | -938.065965  | -938.065110  | -938.067545  | -938.058262  | -938.057619  |
|               | DMSO              | -938.066146  | -938.065129  | -938.068435  | -938.059850  | -938.056502  |
|               | EtOH              | -938.068493  | -938.067615  | -938.071623  | -938.062661  | -938.058423  |
| <b>29</b>     | Gas-phase         | -1028.052225 | -1028.046997 | -1028.048385 | -1028.042263 | -1028.044828 |
|               | CHCl <sub>3</sub> | -1028.078218 | -1028.075077 | -1028.077705 | -1028.070164 | -1028.068067 |
|               | DMSO              | -1028.077811 | -1028.076288 | -1028.079238 | -1028.072639 | -1028.067640 |
|               | EtOH              | -1028.080596 | -1028.077747 | -1028.080093 | -1028.074424 | -1028.067707 |
| <b>37</b>     | Gas-phase         | -1028.053189 | -1028.048625 | -1028.049618 | -1028.040116 | -1028.044208 |
|               | CHCl <sub>3</sub> | -1028.079635 | -1028.077996 | -1028.079942 | -1028.069928 | -1028.068309 |
|               | DMSO              | -1028.079204 | -1028.078478 | -1028.082255 | -1028.073296 | -1028.067839 |
|               | EtOH              | -1028.080411 | -1028.080125 | -1028.083971 | -1028.073774 | -1028.067911 |
| <b>38</b>     | Gas-phase         | -1118.060823 | -1118.054938 | -1118.056710 | -1118.047641 | -1118.052197 |
|               | CHCl <sub>3</sub> | -1118.088726 | -1118.085422 | -1118.088629 | -1118.081061 | -1118.077821 |
|               | DMSO              | -1118.090309 | -1118.088891 | -1118.091961 | -1118.085154 | -1118.078822 |
|               | EtOH              | -1118.089372 | -1118.088179 | -1118.091578 | -1118.084570 | -1118.076966 |



**Table S14.** Selected geometric parameters and delocalization parameters for structures **27a-d**, **27g**, **37a-d** and **37g**

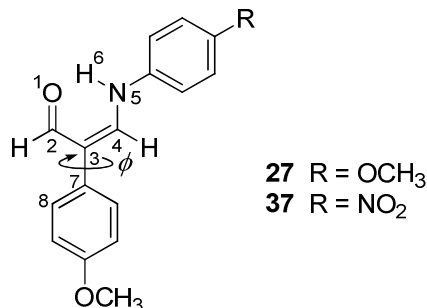

| Medium     |                   | Bond distances (Å)             |                                |                                |                                |                                |                                |                                | $\phi$ (°) | $\varrho$ | $\langle \lambda \rangle$ | HOMA index |
|------------|-------------------|--------------------------------|--------------------------------|--------------------------------|--------------------------------|--------------------------------|--------------------------------|--------------------------------|------------|-----------|---------------------------|------------|
|            |                   | O <sub>1</sub> -C <sub>2</sub> | C <sub>2</sub> -C <sub>3</sub> | C <sub>3</sub> -C <sub>4</sub> | C <sub>4</sub> -N <sub>5</sub> | O <sub>1</sub> -N <sub>5</sub> | O <sub>1</sub> -H <sub>6</sub> | N <sub>5</sub> -H <sub>6</sub> |            |           |                           |            |
| <b>27a</b> | Gas-phase         | 1.226                          | 1.448                          | 1.373                          | 1.344                          | 2.678                          | 1.898                          | 1.019                          | 44.11      | 0.193     | 0.312                     | 0.91       |
| <b>27b</b> |                   | 1.212                          | 1.467                          | 1.358                          | 1.353                          | 4.143                          | 4.724                          | 1.012                          | 52.39      | 0.250     | 0.754                     | 0.80       |
| <b>27c</b> |                   | 1.209                          | 1.462                          | 1.358                          | 1.356                          | 4.764                          | 4.970                          | 1.012                          | 47.90      | 0.251     | 0.244                     | 0.80       |
| <b>27d</b> |                   | 1.210                          | 1.461                          | 1.363                          | 1.361                          | 4.174                          | 3.840                          | 1.008                          | 43.74      | 0.249     | 0.753                     | 0.81       |
| <b>27g</b> |                   | 1.319                          | 1.362                          | 1.449                          | 1.287                          | 2.584                          | 0.999                          | 1.694                          | 44.20      | -0.119    | 0.333                     | 0.60       |
| <b>27a</b> | CHCl <sub>3</sub> | 1.232                          | 1.441                          | 1.378                          | 1.340                          | 2.694                          | 1.926                          | 1.018                          | 43.26      | 0.171     | 0.337                     | 0.94       |
| <b>27b</b> |                   | 1.221                          | 1.457                          | 1.365                          | 1.345                          | 4.148                          | 4.738                          | 1.014                          | 50.57      | 0.216     | 0.286                     | 0.87       |
| <b>27c</b> |                   | 1.219                          | 1.451                          | 1.365                          | 1.347                          | 4.763                          | 4.986                          | 1.014                          | 51.81      | 0.214     | 0.714                     | 0.88       |
| <b>27d</b> |                   | 1.219                          | 1.452                          | 1.370                          | 1.351                          | 4.189                          | 3.869                          | 1.011                          | 46.28      | 0.214     | 0.288                     | 0.88       |
| <b>27g</b> |                   | 1.323                          | 1.361                          | 1.451                          | 1.288                          | 2.568                          | 1.004                          | 1.670                          | 42.29      | -0.125    | 0.327                     | 0.57       |
| <b>27a</b> | DMSO              | 1.232                          | 1.441                          | 1.379                          | 1.339                          | 2.704                          | 1.942                          | 1.018                          | 41.40      | 0.169     | 0.340                     | 0.94       |
| <b>27b</b> |                   | 1.222                          | 1.455                          | 1.367                          | 1.344                          | 4.159                          | 4.748                          | 1.015                          | 50.50      | 0.210     | 0.708                     | 0.88       |
| <b>27c</b> |                   | 1.221                          | 1.448                          | 1.368                          | 1.345                          | 4.764                          | 4.990                          | 1.015                          | 53.57      | 0.204     | 0.298                     | 0.89       |
| <b>27d</b> |                   | 1.221                          | 1.450                          | 1.373                          | 1.347                          | 4.194                          | 3.881                          | 1.012                          | 46.32      | 0.203     | 0.700                     | 0.89       |
| <b>27g</b> |                   | 1.323                          | 1.362                          | 1.450                          | 1.289                          | 2.559                          | 1.006                          | 1.653                          | 40.17      | -0.122    | 0.331                     | 0.58       |
| <b>27a</b> | EtOH              | 1.238                          | 1.434                          | 1.381                          | 1.336                          | 2.707                          | 1.948                          | 1.018                          | 42.37      | 0.151     | 0.360                     | 0.96       |
| <b>27b</b> |                   | 1.230                          | 1.446                          | 1.371                          | 1.340                          | 4.152                          | 4.743                          | 1.015                          | 51.27      | 0.185     | 0.321                     | 0.92       |
| <b>27c</b> |                   | 1.229                          | 1.439                          | 1.371                          | 1.340                          | 4.758                          | 4.982                          | 1.015                          | 54.60      | 0.179     | 0.673                     | 0.93       |
| <b>27d</b> |                   | 1.229                          | 1.441                          | 1.376                          | 1.344                          | 4.200                          | 3.894                          | 1.013                          | 49.05      | 0.180     | 0.327                     | 0.93       |
| <b>27g</b> |                   | 1.329                          | 1.360                          | 1.452                          | 1.288                          | 2.570                          | 1.005                          | 1.672                          | 41.01      | -0.133    | 0.319                     | 0.52       |
| <b>37a</b> | Gas-phase         | 1.222                          | 1.458                          | 1.365                          | 1.355                          | 2.680                          | 1.894                          | 1.019                          | 47.36      | 0.226     | 0.276                     | 0.85       |
| <b>37b</b> |                   | 1.209                          | 1.476                          | 1.352                          | 1.364                          | 4.146                          | 4.717                          | 1.012                          | 54.26      | 0.279     | 0.785                     | 0.73       |
| <b>37c</b> |                   | 1.206                          | 1.469                          | 1.353                          | 1.367                          | 4.761                          | 4.944                          | 1.013                          | 49.08      | 0.277     | 0.215                     | 0.74       |
| <b>37d</b> |                   | 1.207                          | 1.469                          | 1.357                          | 1.372                          | 4.168                          | 3.821                          | 1.008                          | 44.66      | 0.277     | 0.783                     | 0.74       |
| <b>37g</b> |                   | 1.317                          | 1.364                          | 1.443                          | 1.291                          | 2.598                          | 0.994                          | 1.720                          | 46.28      | -0.105    | 0.349                     | 0.64       |
| <b>37a</b> | CHCl <sub>3</sub> | 1.226                          | 1.453                          | 1.368                          | 1.353                          | 2.700                          | 1.931                          | 1.018                          | 43.90      | 0.212     | 0.292                     | 0.88       |
| <b>37b</b> |                   | 1.216                          | 1.468                          | 1.357                          | 1.358                          | 4.148                          | 4.731                          | 1.014                          | 49.69      | 0.253     | 0.245                     | 0.79       |
| <b>37c</b> |                   | 1.214                          | 1.460                          | 1.358                          | 1.360                          | 4.761                          | 4.964                          | 1.015                          | 52.96      | 0.248     | 0.751                     | 0.81       |
| <b>37d</b> |                   | 1.215                          | 1.462                          | 1.362                          | 1.365                          | 4.185                          | 3.857                          | 1.011                          | 47.06      | 0.250     | 0.249                     | 0.81       |
| <b>37g</b> |                   | 1.320                          | 1.364                          | 1.444                          | 1.292                          | 2.581                          | 0.999                          | 1.695                          | 42.16      | -0.108    | 0.346                     | 0.62       |
| <b>37a</b> | DMSO              | 1.227                          | 1.453                          | 1.369                          | 1.352                          | 2.708                          | 1.941                          | 1.018                          | 42.97      | 0.209     | 0.296                     | 0.88       |
| <b>37b</b> |                   | 1.217                          | 1.467                          | 1.359                          | 1.357                          | 4.158                          | 4.745                          | 1.015                          | 48.72      | 0.248     | 0.749                     | 0.80       |
| <b>37c</b> |                   | 1.217                          | 1.457                          | 1.360                          | 1.358                          | 4.761                          | 4.974                          | 1.016                          | 54.17      | 0.238     | 0.260                     | 0.84       |
| <b>37d</b> |                   | 1.217                          | 1.461                          | 1.364                          | 1.362                          | 4.189                          | 3.864                          | 1.013                          | 47.16      | 0.242     | 0.742                     | 0.82       |
| <b>37g</b> |                   | 1.320                          | 1.365                          | 1.444                          | 1.293                          | 2.567                          | 1.002                          | 1.672                          | 41.00      | -0.106    | 0.348                     | 0.62       |
| <b>37a</b> | EtOH              | 1.231                          | 1.448                          | 1.370                          | 1.351                          | 2.712                          | 1.952                          | 1.018                          | 43.21      | 0.198     | 0.308                     | 0.90       |
| <b>37b</b> |                   | 1.223                          | 1.459                          | 1.361                          | 1.354                          | 4.152                          | 4.739                          | 1.016                          | 49.74      | 0.229     | 0.272                     | 0.85       |
| <b>37c</b> |                   | 1.223                          | 1.450                          | 1.362                          | 1.355                          | 4.756                          | 4.962                          | 1.016                          | 55.80      | 0.220     | 0.719                     | 0.87       |
| <b>37d</b> |                   | 1.223                          | 1.454                          | 1.365                          | 1.359                          | 4.194                          | 3.875                          | 1.013                          | 49.08      | 0.225     | 0.277                     | 0.86       |
| <b>37g</b> |                   | 1.325                          | 1.362                          | 1.445                          | 1.292                          | 2.589                          | 0.998                          | 1.708                          | 41.13      | -0.116    | 0.337                     | 0.58       |

**Table S15.** Selected geometric parameters and delocalization parameters for structures **29a-d**, **29g**, **38a-d** and **38g**

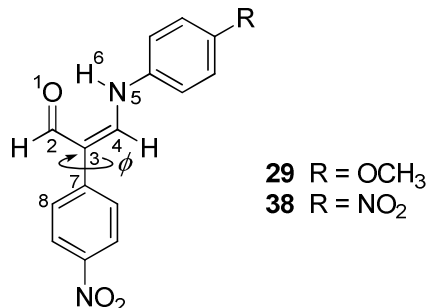

|            | Medium            | Bond distances (Å)             |                                |                                |                                |                                |                                |                                | $\phi$ (°) | $\rho$ | $\langle \lambda \rangle$ | HOMA index |
|------------|-------------------|--------------------------------|--------------------------------|--------------------------------|--------------------------------|--------------------------------|--------------------------------|--------------------------------|------------|--------|---------------------------|------------|
|            |                   | O <sub>1</sub> -C <sub>2</sub> | C <sub>2</sub> -C <sub>3</sub> | C <sub>3</sub> -C <sub>4</sub> | C <sub>4</sub> -N <sub>5</sub> | O <sub>1</sub> -N <sub>5</sub> | O <sub>1</sub> -H <sub>6</sub> | N <sub>5</sub> -H <sub>6</sub> |            |        |                           |            |
| <b>29a</b> | Gas-phase         | 1.224                          | 1.449                          | 1.378                          | 1.337                          | 2.671                          | 1.886                          | 1.020                          | 38.38      | 0.184  | 0.322                     | 0.91       |
| <b>29b</b> |                   | 1.211                          | 1.469                          | 1.363                          | 1.347                          | 4.125                          | 4.727                          | 1.012                          | 45.96      | 0.242  | 0.744                     | 0.80       |
| <b>29c</b> |                   | 1.208                          | 1.463                          | 1.362                          | 1.351                          | 4.769                          | 4.997                          | 1.012                          | 44.18      | 0.244  | 0.251                     | 0.81       |
| <b>29d</b> |                   | 1.209                          | 1.462                          | 1.366                          | 1.354                          | 4.173                          | 3.839                          | 1.008                          | 40.79      | 0.241  | 0.744                     | 0.81       |
| <b>29g</b> |                   | 1.313                          | 1.365                          | 1.451                          | 1.286                          | 2.568                          | 1.005                          | 1.669                          | 39.46      | -0.113 | 0.340                     | 0.64       |
| <b>29a</b> | CHCl <sub>3</sub> | 1.230                          | 1.443                          | 1.384                          | 1.332                          | 2.684                          | 1.912                          | 1.019                          | 35.04      | 0.161  | 0.349                     | 0.94       |
| <b>29b</b> |                   | 1.219                          | 1.459                          | 1.370                          | 1.340                          | 4.129                          | 4.739                          | 1.014                          | 45.05      | 0.210  | 0.292                     | 0.87       |
| <b>29c</b> |                   | 1.217                          | 1.453                          | 1.369                          | 1.342                          | 4.769                          | 5.014                          | 1.014                          | 44.90      | 0.209  | 0.708                     | 0.88       |
| <b>29d</b> |                   | 1.218                          | 1.453                          | 1.375                          | 1.343                          | 4.180                          | 3.847                          | 1.012                          | 41.42      | 0.203  | 0.300                     | 0.88       |
| <b>29g</b> |                   | 1.315                          | 1.366                          | 1.451                          | 1.287                          | 2.546                          | 1.011                          | 1.637                          | 36.19      | -0.113 | 0.341                     | 0.63       |
| <b>29a</b> | DMSO              | 1.230                          | 1.443                          | 1.384                          | 1.332                          | 2.698                          | 1.930                          | 1.019                          | 34.87      | 0.161  | 0.349                     | 0.94       |
| <b>29b</b> |                   | 1.220                          | 1.458                          | 1.373                          | 1.337                          | 4.125                          | 4.740                          | 1.015                          | 40.98      | 0.202  | 0.698                     | 0.88       |
| <b>29c</b> |                   | 1.220                          | 1.451                          | 1.371                          | 1.339                          | 4.770                          | 5.020                          | 1.015                          | 46.48      | 0.199  | 0.304                     | 0.89       |
| <b>29d</b> |                   | 1.221                          | 1.451                          | 1.378                          | 1.340                          | 4.184                          | 3.856                          | 1.013                          | 41.22      | 0.192  | 0.687                     | 0.90       |
| <b>29g</b> |                   | 1.315                          | 1.367                          | 1.450                          | 1.288                          | 2.533                          | 1.016                          | 1.612                          | 35.30      | -0.110 | 0.344                     | 0.63       |
| <b>29a</b> | EtOH              | 1.236                          | 1.437                          | 1.387                          | 1.329                          | 2.699                          | 1.939                          | 1.019                          | 35.26      | 0.143  | 0.369                     | 0.95       |
| <b>29b</b> |                   | 1.227                          | 1.449                          | 1.376                          | 1.334                          | 4.123                          | 4.739                          | 1.015                          | 41.84      | 0.180  | 0.327                     | 0.91       |
| <b>29c</b> |                   | 1.227                          | 1.442                          | 1.374                          | 1.336                          | 4.765                          | 5.010                          | 1.015                          | 49.00      | 0.177  | 0.671                     | 0.93       |
| <b>29d</b> |                   | 1.227                          | 1.444                          | 1.381                          | 1.337                          | 4.187                          | 3.864                          | 1.013                          | 42.10      | 0.173  | 0.334                     | 0.93       |
| <b>29g</b> |                   | 1.320                          | 1.365                          | 1.452                          | 1.287                          | 2.548                          | 1.012                          | 1.639                          | 36.10      | -0.120 | 0.333                     | 0.59       |
| <b>38a</b> | Gas-phase         | 1.221                          | 1.458                          | 1.369                          | 1.348                          | 2.672                          | 1.882                          | 1.020                          | 40.80      | 0.216  | 0.287                     | 0.86       |
| <b>38b</b> |                   | 1.208                          | 1.477                          | 1.355                          | 1.358                          | 4.129                          | 4.722                          | 1.012                          | 48.49      | 0.272  | 0.777                     | 0.74       |
| <b>38c</b> |                   | 1.205                          | 1.470                          | 1.355                          | 1.362                          | 4.765                          | 4.968                          | 1.012                          | 46.27      | 0.272  | 0.221                     | 0.75       |
| <b>38d</b> |                   | 1.206                          | 1.469                          | 1.359                          | 1.365                          | 4.171                          | 3.823                          | 1.008                          | 43.71      | 0.269  | 0.775                     | 0.76       |
| <b>38g</b> |                   | 1.311                          | 1.366                          | 1.445                          | 1.288                          | 2.587                          | 0.998                          | 1.704                          | 41.93      | -0.102 | 0.352                     | 0.67       |
| <b>38a</b> | CHCl <sub>3</sub> | 1.225                          | 1.454                          | 1.373                          | 1.345                          | 2.686                          | 1.913                          | 1.019                          | 36.42      | 0.201  | 0.304                     | 0.89       |
| <b>38b</b> |                   | 1.215                          | 1.468                          | 1.360                          | 1.353                          | 4.138                          | 4.733                          | 1.014                          | 47.65      | 0.246  | 0.252                     | 0.80       |
| <b>38c</b> |                   | 1.214                          | 1.461                          | 1.360                          | 1.355                          | 4.765                          | 4.987                          | 1.014                          | 48.33      | 0.242  | 0.745                     | 0.82       |
| <b>38d</b> |                   | 1.214                          | 1.462                          | 1.365                          | 1.357                          | 4.184                          | 3.847                          | 1.012                          | 44.60      | 0.240  | 0.259                     | 0.82       |
| <b>38g</b> |                   | 1.314                          | 1.367                          | 1.445                          | 1.290                          | 2.571                          | 1.002                          | 1.680                          | 39.30      | -0.102 | 0.352                     | 0.66       |
| <b>38a</b> | DMSO              | 1.226                          | 1.453                          | 1.373                          | 1.345                          | 2.703                          | 1.931                          | 1.019                          | 37.60      | 0.199  | 0.306                     | 0.89       |
| <b>38b</b> |                   | 1.216                          | 1.467                          | 1.362                          | 1.351                          | 4.147                          | 4.746                          | 1.015                          | 45.93      | 0.240  | 0.741                     | 0.82       |
| <b>38c</b> |                   | 1.216                          | 1.458                          | 1.362                          | 1.352                          | 4.766                          | 4.994                          | 1.015                          | 49.66      | 0.232  | 0.267                     | 0.84       |
| <b>38d</b> |                   | 1.217                          | 1.460                          | 1.367                          | 1.354                          | 4.187                          | 3.856                          | 1.013                          | 44.66      | 0.230  | 0.730                     | 0.84       |
| <b>38g</b> |                   | 1.313                          | 1.368                          | 1.445                          | 1.291                          | 2.554                          | 1.007                          | 1.651                          | 37.38      | -0.099 | 0.356                     | 0.67       |
| <b>38a</b> | EtOH              | 1.230                          | 1.448                          | 1.375                          | 1.343                          | 2.698                          | 1.932                          | 1.019                          | 36.67      | 0.186  | 0.321                     | 0.91       |
| <b>38b</b> |                   | 1.222                          | 1.459                          | 1.364                          | 1.349                          | 4.143                          | 4.741                          | 1.016                          | 47.35      | 0.222  | 0.280                     | 0.86       |
| <b>38c</b> |                   | 1.222                          | 1.451                          | 1.364                          | 1.350                          | 4.761                          | 4.983                          | 1.016                          | 51.47      | 0.215  | 0.714                     | 0.88       |
| <b>38d</b> |                   | 1.222                          | 1.454                          | 1.369                          | 1.352                          | 4.193                          | 3.868                          | 1.014                          | 45.60      | 0.215  | 0.288                     | 0.87       |
| <b>38g</b> |                   | 1.318                          | 1.366                          | 1.446                          | 1.290                          | 2.580                          | 1.001                          | 1.695                          | 37.65      | -0.108 | 0.346                     | 0.63       |

**Table S16.** Free energy values (hartrees) calculated at M06-2X/6-31++G(d,p) level for structures **30a-f** and **39a-f** in gas phase, chloroform, dimethyl sulfoxide and ethanol

|           |                   | <b>a</b>     | <b>b</b>     | <b>c</b>     | <b>d</b>     | <b>e</b>     | <b>f</b>     |
|-----------|-------------------|--------------|--------------|--------------|--------------|--------------|--------------|
| <b>30</b> | Gas-phase         | -1124.616128 | -1124.607767 | -1124.610130 | -1124.605532 | -1124.599885 | -1124.595077 |
|           | CHCl <sub>3</sub> | -1124.647701 | -1124.642549 | -1124.644299 | -1124.640001 | -1124.634437 | -1124.629424 |
|           | DMSO              | -1124.641999 | -1124.638609 | -1124.640932 | -1124.637450 | -1124.631134 | -1124.627743 |
|           | EtOH              | -1124.643764 | -1124.640851 | -1124.642649 | -1124.639449 | -1124.633340 | -1124.628866 |
| <b>39</b> | Gas-phase         | -1034.606967 | -1034.599318 | -1034.600724 | -1034.594759 | -1034.589540 | -1034.585299 |
|           | CHCl <sub>3</sub> | -1034.635849 | -1034.631779 | -1034.633756 | -1034.630011 | -1034.623677 | -1034.617279 |
|           | DMSO              | -1034.630220 | -1034.626335 | -1034.630002 | -1034.627279 | -1034.618663 | -1034.613745 |
|           | EtOH              | -1034.633988 | -1034.632347 | -1034.634069 | -1034.630470 | -1034.622452 | -1034.617594 |

**Table S17.** Selected geometric parameters and delocalization parameters for structures **30a-f** and **39a-f**

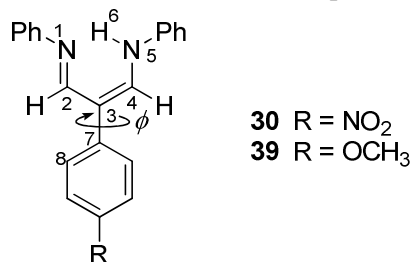

|            | Medium            | Bond distances (Å)             |                                |                                |                                |                                |                                |                                | $\phi$ (°) | $Q$   | $\langle \lambda \rangle$ | HOMA index |
|------------|-------------------|--------------------------------|--------------------------------|--------------------------------|--------------------------------|--------------------------------|--------------------------------|--------------------------------|------------|-------|---------------------------|------------|
|            |                   | N <sub>1</sub> -C <sub>2</sub> | C <sub>2</sub> -C <sub>3</sub> | C <sub>3</sub> -C <sub>4</sub> | C <sub>4</sub> -N <sub>5</sub> | N <sub>1</sub> -N <sub>5</sub> | N <sub>1</sub> -H <sub>6</sub> | N <sub>5</sub> -H <sub>6</sub> |            |       |                           |            |
| <b>30a</b> | Gas-phase         | 1.286                          | 1.447                          | 1.373                          | 1.343                          | 2.711                          | 1.904                          | 1.024                          | 39.37      | 0.131 | 0.354                     | 0.87       |
| <b>30b</b> |                   | 1.276                          | 1.463                          | 1.360                          | 1.357                          | 4.164                          | 4.744                          | 1.011                          | 43.18      | 0.184 | 0.295                     | 0.77       |
| <b>30c</b> |                   | 1.274                          | 1.456                          | 1.358                          | 1.360                          | 4.814                          | 5.016                          | 1.011                          | 47.86      | 0.184 | 0.294                     | 0.77       |
| <b>30d</b> |                   | 1.275                          | 1.458                          | 1.361                          | 1.365                          | 4.160                          | 3.821                          | 1.008                          | 38.42      | 0.187 | 0.292                     | 0.77       |
| <b>30e</b> |                   | 1.274                          | 1.464                          | 1.359                          | 1.374                          | 4.185                          | 5.152                          | 1.008                          | 36.20      | 0.205 | 0.274                     | 0.72       |
| <b>30f</b> |                   | 1.275                          | 1.460                          | 1.364                          | 1.362                          | 3.022                          | 3.960                          | 1.008                          | 47.87      | 0.183 | 0.297                     | 0.77       |
| <b>30a</b> | CHCl <sub>3</sub> | 1.288                          | 1.446                          | 1.377                          | 1.340                          | 2.718                          | 1.920                          | 1.023                          | 37.11      | 0.121 | 0.365                     | 0.88       |
| <b>30b</b> |                   | 1.280                          | 1.460                          | 1.365                          | 1.351                          | 4.159                          | 4.736                          | 1.013                          | 38.50      | 0.166 | 0.316                     | 0.80       |
| <b>30c</b> |                   | 1.279                          | 1.451                          | 1.364                          | 1.354                          | 4.810                          | 5.013                          | 1.013                          | 50.95      | 0.162 | 0.319                     | 0.82       |
| <b>30d</b> |                   | 1.279                          | 1.455                          | 1.367                          | 1.356                          | 4.170                          | 3.819                          | 1.011                          | 38.01      | 0.165 | 0.317                     | 0.81       |
| <b>30e</b> |                   | 1.280                          | 1.458                          | 1.368                          | 1.359                          | 4.185                          | 5.167                          | 1.012                          | 35.10      | 0.169 | 0.313                     | 0.80       |
| <b>30f</b> |                   | 1.278                          | 1.457                          | 1.368                          | 1.358                          | 3.047                          | 3.979                          | 1.011                          | 46.16      | 0.169 | 0.313                     | 0.80       |
| <b>30a</b> | DMSO              | 1.289                          | 1.446                          | 1.378                          | 1.340                          | 2.722                          | 1.929                          | 1.023                          | 35.68      | 0.119 | 0.368                     | 0.88       |
| <b>30b</b> |                   | 1.282                          | 1.457                          | 1.367                          | 1.348                          | 4.166                          | 4.755                          | 1.014                          | 41.22      | 0.156 | 0.327                     | 0.82       |
| <b>30c</b> |                   | 1.283                          | 1.447                          | 1.366                          | 1.350                          | 4.810                          | 5.024                          | 1.014                          | 51.74      | 0.148 | 0.334                     | 0.85       |
| <b>30d</b> |                   | 1.281                          | 1.452                          | 1.370                          | 1.352                          | 4.171                          | 3.819                          | 1.013                          | 36.98      | 0.153 | 0.330                     | 0.83       |
| <b>30e</b> |                   | 1.280                          | 1.457                          | 1.368                          | 1.359                          | 4.185                          | 5.165                          | 1.013                          | 33.52      | 0.168 | 0.314                     | 0.80       |
| <b>30f</b> |                   | 1.281                          | 1.455                          | 1.370                          | 1.356                          | 3.052                          | 3.981                          | 1.013                          | 45.05      | 0.160 | 0.323                     | 0.82       |
| <b>30a</b> | EtOH              | 1.289                          | 1.446                          | 1.378                          | 1.340                          | 2.725                          | 1.933                          | 1.023                          | 35.32      | 0.119 | 0.368                     | 0.88       |
| <b>30b</b> |                   | 1.282                          | 1.457                          | 1.368                          | 1.348                          | 4.165                          | 4.749                          | 1.014                          | 39.58      | 0.155 | 0.328                     | 0.82       |
| <b>30c</b> |                   | 1.282                          | 1.448                          | 1.366                          | 1.351                          | 4.805                          | 4.812                          | 1.014                          | 51.48      | 0.151 | 0.331                     | 0.84       |
| <b>30d</b> |                   | 1.281                          | 1.453                          | 1.370                          | 1.352                          | 4.169                          | 3.815                          | 1.013                          | 36.97      | 0.154 | 0.329                     | 0.83       |
| <b>30e</b> |                   | 1.280                          | 1.458                          | 1.368                          | 1.359                          | 4.185                          | 5.167                          | 1.012                          | 34.28      | 0.169 | 0.313                     | 0.80       |
| <b>30f</b> |                   | 1.281                          | 1.456                          | 1.370                          | 1.356                          | 3.060                          | 3.990                          | 1.013                          | 44.99      | 0.161 | 0.322                     | 0.82       |
| <b>39a</b> | Gas-phase         | 1.288                          | 1.446                          | 1.368                          | 1.350                          | 2.723                          | 1.928                          | 1.022                          | 45.15      | 0.140 | 0.344                     | 0.86       |
| <b>39b</b> |                   | 1.277                          | 1.461                          | 1.356                          | 1.362                          | 4.178                          | 4.744                          | 1.012                          | 50.71      | 0.190 | 0.289                     | 0.76       |
| <b>39c</b> |                   | 1.276                          | 1.454                          | 1.357                          | 1.364                          | 4.806                          | 4.983                          | 1.012                          | 49.79      | 0.185 | 0.293                     | 0.78       |
| <b>39d</b> |                   | 1.276                          | 1.457                          | 1.358                          | 1.373                          | 4.167                          | 3.846                          | 1.008                          | 42.51      | 0.196 | 0.283                     | 0.75       |
| <b>39e</b> |                   | 1.275                          | 1.464                          | 1.355                          | 1.384                          | 4.170                          | 5.125                          | 1.008                          | 39.13      | 0.218 | 0.261                     | 0.69       |
| <b>39f</b> |                   | 1.276                          | 1.459                          | 1.360                          | 1.370                          | 3.009                          | 3.937                          | 1.008                          | 54.11      | 0.193 | 0.287                     | 0.75       |
| <b>39a</b> | CHCl <sub>3</sub> | 1.290                          | 1.445                          | 1.371                          | 1.349                          | 2.733                          | 1.947                          | 1.021                          | 43.17      | 0.133 | 0.352                     | 0.88       |
| <b>39b</b> |                   | 1.282                          | 1.458                          | 1.361                          | 1.357                          | 4.183                          | 4.763                          | 1.013                          | 46.49      | 0.172 | 0.309                     | 0.80       |
| <b>39c</b> |                   | 1.280                          | 1.449                          | 1.361                          | 1.358                          | 4.805                          | 4.990                          | 1.013                          | 55.51      | 0.166 | 0.314                     | 0.82       |
| <b>39d</b> |                   | 1.280                          | 1.454                          | 1.362                          | 1.366                          | 4.176                          | 3.851                          | 1.011                          | 44.23      | 0.178 | 0.303                     | 0.79       |
| <b>39e</b> |                   | 1.278                          | 1.460                          | 1.359                          | 1.377                          | 4.174                          | 5.137                          | 1.011                          | 38.93      | 0.200 | 0.280                     | 0.74       |
| <b>39f</b> |                   | 1.279                          | 1.457                          | 1.363                          | 1.368                          | 3.034                          | 3.962                          | 1.011                          | 50.20      | 0.183 | 0.298                     | 0.78       |
| <b>39a</b> | DMSO              | 1.291                          | 1.444                          | 1.372                          | 1.348                          | 2.732                          | 1.949                          | 1.021                          | 41.21      | 0.129 | 0.357                     | 0.88       |
| <b>39b</b> |                   | 1.284                          | 1.456                          | 1.363                          | 1.355                          | 4.185                          | 4.762                          | 1.014                          | 45.66      | 0.164 | 0.318                     | 0.82       |
| <b>39c</b> |                   | 1.284                          | 1.446                          | 1.364                          | 1.355                          | 4.803                          | 4.993                          | 1.014                          | 56.26      | 0.153 | 0.329                     | 0.84       |
| <b>39d</b> |                   | 1.283                          | 1.452                          | 1.364                          | 1.361                          | 4.182                          | 3.836                          | 1.012                          | 45.57      | 0.166 | 0.316                     | 0.82       |
| <b>39e</b> |                   | 1.280                          | 1.457                          | 1.361                          | 1.371                          | 4.175                          | 5.142                          | 1.012                          | 40.58      | 0.187 | 0.294                     | 0.77       |
| <b>39f</b> |                   | 1.281                          | 1.455                          | 1.365                          | 1.366                          | 3.043                          | 3.968                          | 1.012                          | 48.83      | 0.175 | 0.307                     | 0.79       |
| <b>39a</b> | EtOH              | 1.291                          | 1.444                          | 1.371                          | 1.348                          | 2.743                          | 1.963                          | 1.021                          | 42.50      | 0.130 | 0.355                     | 0.88       |
| <b>39b</b> |                   | 1.284                          | 1.456                          | 1.362                          | 1.355                          | 4.186                          | 4.762                          | 1.014                          | 45.85      | 0.165 | 0.317                     | 0.81       |
| <b>39c</b> |                   | 1.284                          | 1.446                          | 1.363                          | 1.355                          | 4.806                          | 5.004                          | 1.014                          | 58.20      | 0.154 | 0.328                     | 0.84       |
| <b>39d</b> |                   | 1.282                          | 1.452                          | 1.364                          | 1.361                          | 4.181                          | 3.839                          | 1.012                          | 46.33      | 0.167 | 0.315                     | 0.81       |
| <b>39e</b> |                   | 1.280                          | 1.457                          | 1.361                          | 1.371                          | 4.177                          | 5.146                          | 1.012                          | 41.08      | 0.187 | 0.294                     | 0.77       |
| <b>39f</b> |                   | 1.281                          | 1.455                          | 1.364                          | 1.366                          | 3.053                          | 3.979                          | 1.012                          | 49.56      | 0.176 | 0.306                     | 0.79       |

**Table S18.** Free energy values (hartrees) calculated at M06-2X/6-31++G(d,p) level for structures **40-43a-d** in gas-phase, chloroform, dimethyl sulfoxide and ethanol

|           |                   | <b>a</b>     | <b>b</b>     | <b>c</b>     | <b>d</b>     |
|-----------|-------------------|--------------|--------------|--------------|--------------|
| <b>40</b> | Gas-phase         | -1263.570283 | -1263.562752 | -1263.563985 | -1263.558365 |
|           | CHCl <sub>3</sub> | -1263.602452 | -1263.596752 | -1263.598948 | -1263.595076 |
|           | DMSO              | -1263.597062 | -1263.594392 | -1263.596986 | -1263.591575 |
|           | EtOH              | -1263.601462 | -1263.598108 | -1263.600622 | -1263.597308 |
| <b>41</b> | Gas-phase         | -1443.592468 | -1443.585989 | -1443.587141 | -1443.579641 |
|           | CHCl <sub>3</sub> | -1443.627190 | -1443.625027 | -1443.624933 | -1443.618972 |
|           | DMSO              | -1443.626052 | -1443.622743 | -1443.624643 | -1443.620374 |
|           | EtOH              | -1443.627210 | -1443.622765 | -1443.626110 | -1443.620444 |
| <b>42</b> | Gas-phase         | -1353.580406 | -1353.571589 | -1353.572497 | -1353.568698 |
|           | CHCl <sub>3</sub> | -1353.614649 | -1353.607658 | -1353.609515 | -1353.608668 |
|           | DMSO              | -1353.610096 | -1353.604029 | -1353.607995 | -1353.604943 |
|           | EtOH              | -1353.612591 | -1353.607212 | -1353.609628 | -1353.606352 |
| <b>43</b> | Gas-phase         | -1533.598436 | -1533.590847 | -1533.592383 | -1533.586062 |
|           | CHCl <sub>3</sub> | -1533.637265 | -1533.632519 | -1533.635105 | -1533.629895 |
|           | DMSO              | -1533.638663 | -1533.632858 | -1533.635847 | -1533.630957 |
|           | EtOH              | -1533.637223 | -1533.630421 | -1533.635619 | -1533.629661 |

**Table S19.** Selected geometric parameters and delocalization parameters for structures **40a-d** and **41a-d**

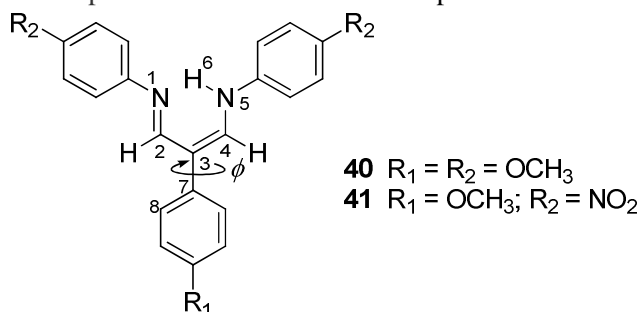

| Medium     |                 | Bond distances (Å)      |                         |                         |                         |                         |                         |                         | $\phi$ (°) | $Q$   | $\langle \lambda \rangle$ | HOMA index |
|------------|-----------------|-------------------------|-------------------------|-------------------------|-------------------------|-------------------------|-------------------------|-------------------------|------------|-------|---------------------------|------------|
|            |                 | $\text{N}_1\text{-C}_2$ | $\text{C}_2\text{-C}_3$ | $\text{C}_3\text{-C}_4$ | $\text{C}_4\text{-N}_5$ | $\text{N}_1\text{-N}_5$ | $\text{N}_1\text{-H}_6$ | $\text{N}_5\text{-H}_6$ |            |       |                           |            |
| <b>40a</b> | Gas-phase       | 1.289                   | 1.445                   | 1.369                   | 1.348                   | 2.718                   | 1.922                   | 1.022                   | 44.67      | 0.135 | 0.349                     | 0.87       |
| <b>40b</b> |                 | 1.278                   | 1.460                   | 1.357                   | 1.361                   | 4.176                   | 4.744                   | 1.011                   | 47.79      | 0.186 | 0.293                     | 0.77       |
| <b>40c</b> |                 | 1.276                   | 1.454                   | 1.358                   | 1.363                   | 4.811                   | 5.001                   | 1.011                   | 48.87      | 0.183 | 0.295                     | 0.78       |
| <b>40d</b> |                 | 1.276                   | 1.457                   | 1.359                   | 1.371                   | 4.160                   | 3.835                   | 1.008                   | 41.54      | 0.193 | 0.286                     | 0.76       |
| <b>40a</b> | $\text{CHCl}_3$ | 1.291                   | 1.444                   | 1.373                   | 1.346                   | 2.725                   | 1.938                   | 1.022                   | 43.08      | 0.126 | 0.360                     | 0.88       |
| <b>40b</b> |                 | 1.282                   | 1.457                   | 1.362                   | 1.355                   | 4.176                   | 4.749                   | 1.013                   | 46.86      | 0.168 | 0.313                     | 0.81       |
| <b>40c</b> |                 | 1.281                   | 1.449                   | 1.363                   | 1.356                   | 4.811                   | 5.012                   | 1.013                   | 54.26      | 0.161 | 0.320                     | 0.83       |
| <b>40d</b> |                 | 1.280                   | 1.454                   | 1.364                   | 1.363                   | 4.175                   | 3.842                   | 1.010                   | 42.55      | 0.173 | 0.308                     | 0.80       |
| <b>40a</b> | DMSO            | 1.291                   | 1.444                   | 1.374                   | 1.346                   | 2.722                   | 1.931                   | 1.022                   | 40.90      | 0.125 | 0.361                     | 0.89       |
| <b>40b</b> |                 | 1.284                   | 1.456                   | 1.364                   | 1.352                   | 4.177                   | 4.757                   | 1.014                   | 43.33      | 0.160 | 0.322                     | 0.82       |
| <b>40c</b> |                 | 1.284                   | 1.446                   | 1.365                   | 1.352                   | 4.810                   | 5.020                   | 1.014                   | 55.18      | 0.149 | 0.333                     | 0.85       |
| <b>40d</b> |                 | 1.283                   | 1.451                   | 1.367                   | 1.358                   | 4.183                   | 3.848                   | 1.012                   | 43.17      | 0.159 | 0.324                     | 0.83       |
| <b>40a</b> | EtOH            | 1.291                   | 1.443                   | 1.373                   | 1.346                   | 2.741                   | 1.960                   | 1.021                   | 42.08      | 0.125 | 0.361                     | 0.89       |
| <b>40b</b> |                 | 1.284                   | 1.455                   | 1.364                   | 1.353                   | 4.182                   | 4.759                   | 1.014                   | 44.76      | 0.160 | 0.322                     | 0.82       |
| <b>40c</b> |                 | 1.284                   | 1.445                   | 1.365                   | 1.353                   | 4.809                   | 5.016                   | 1.014                   | 56.54      | 0.149 | 0.333                     | 0.85       |
| <b>40d</b> |                 | 1.283                   | 1.451                   | 1.366                   | 1.359                   | 4.180                   | 3.842                   | 1.012                   | 44.55      | 0.161 | 0.321                     | 0.82       |
| <b>41a</b> | Gas-phase       | 1.289                   | 1.446                   | 1.365                   | 1.356                   | 2.724                   | 1.928                   | 1.021                   | 46.36      | 0.148 | 0.335                     | 0.86       |
| <b>41b</b> |                 | 1.278                   | 1.460                   | 1.354                   | 1.366                   | 4.174                   | 4.735                   | 1.012                   | 50.54      | 0.194 | 0.284                     | 0.76       |
| <b>41c</b> |                 | 1.276                   | 1.453                   | 1.356                   | 1.368                   | 4.796                   | 4.950                   | 1.013                   | 53.25      | 0.189 | 0.289                     | 0.77       |
| <b>41d</b> |                 | 1.277                   | 1.458                   | 1.356                   | 1.378                   | 4.146                   | 3.821                   | 1.008                   | 42.33      | 0.203 | 0.276                     | 0.73       |
| <b>41a</b> | $\text{CHCl}_3$ | 1.291                   | 1.445                   | 1.368                   | 1.355                   | 2.728                   | 1.941                   | 1.022                   | 44.02      | 0.141 | 0.344                     | 0.87       |
| <b>41b</b> |                 | 1.283                   | 1.456                   | 1.358                   | 1.362                   | 4.182                   | 4.745                   | 1.015                   | 49.75      | 0.177 | 0.303                     | 0.80       |
| <b>41c</b> |                 | 1.282                   | 1.448                   | 1.359                   | 1.363                   | 4.794                   | 4.963                   | 1.015                   | 55.70      | 0.170 | 0.310                     | 0.81       |
| <b>41d</b> |                 | 1.281                   | 1.453                   | 1.360                   | 1.372                   | 4.163                   | 3.836                   | 1.012                   | 42.74      | 0.184 | 0.297                     | 0.78       |
| <b>41a</b> | DMSO            | 1.291                   | 1.444                   | 1.369                   | 1.354                   | 2.724                   | 1.937                   | 1.023                   | 42.21      | 0.138 | 0.347                     | 0.87       |
| <b>41b</b> |                 | 1.284                   | 1.455                   | 1.360                   | 1.360                   | 4.176                   | 4.748                   | 1.016                   | 46.80      | 0.171 | 0.310                     | 0.81       |
| <b>41c</b> |                 | 1.285                   | 1.445                   | 1.361                   | 1.360                   | 4.795                   | 4.977                   | 1.016                   | 55.77      | 0.159 | 0.322                     | 0.84       |
| <b>41d</b> |                 | 1.284                   | 1.451                   | 1.363                   | 1.367                   | 4.161                   | 3.814                   | 1.013                   | 43.59      | 0.171 | 0.311                     | 0.81       |
| <b>41a</b> | EtOH            | 1.291                   | 1.446                   | 1.368                   | 1.355                   | 2.738                   | 1.953                   | 1.021                   | 41.72      | 0.142 | 0.343                     | 0.86       |
| <b>41b</b> |                 | 1.285                   | 1.455                   | 1.359                   | 1.361                   | 4.184                   | 4.751                   | 1.016                   | 48.12      | 0.172 | 0.309                     | 0.81       |
| <b>41c</b> |                 | 1.285                   | 1.445                   | 1.360                   | 1.361                   | 4.795                   | 4.975                   | 1.016                   | 57.69      | 0.161 | 0.320                     | 0.83       |
| <b>41d</b> |                 | 1.283                   | 1.451                   | 1.362                   | 1.369                   | 4.155                   | 3.808                   | 1.013                   | 43.91      | 0.175 | 0.307                     | 0.80       |

**Table S20.** Selected geometric parameters and delocalization parameters for structures **42a-d** and **43a-d**

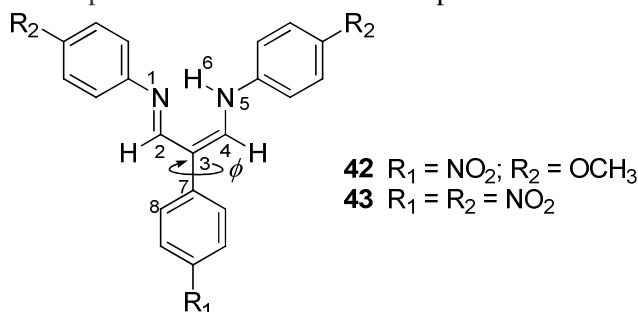

| Medium     |                 | Bond distances (Å)      |                         |                         |                         |                         |                         |                         | $\phi$ (°) | $Q$   | $\langle \lambda \rangle$ | HOMA index |
|------------|-----------------|-------------------------|-------------------------|-------------------------|-------------------------|-------------------------|-------------------------|-------------------------|------------|-------|---------------------------|------------|
|            |                 | $\text{N}_1\text{-C}_2$ | $\text{C}_2\text{-C}_3$ | $\text{C}_3\text{-C}_4$ | $\text{C}_4\text{-N}_5$ | $\text{N}_1\text{-N}_5$ | $\text{N}_1\text{-H}_6$ | $\text{N}_5\text{-H}_6$ |            |       |                           |            |
| <b>42a</b> | Gas-phase       | 1.287                   | 1.446                   | 1.375                   | 1.340                   | 2.701                   | 1.900                   | 1.024                   | 37.37      | 0.124 | 0.362                     | 0.88       |
| <b>42b</b> |                 | 1.276                   | 1.463                   | 1.361                   | 1.355                   | 4.156                   | 4.739                   | 1.011                   | 41.12      | 0.181 | 0.299                     | 0.77       |
| <b>42c</b> |                 | 1.275                   | 1.456                   | 1.360                   | 1.359                   | 4.816                   | 5.024                   | 1.011                   | 47.54      | 0.180 | 0.299                     | 0.78       |
| <b>42d</b> |                 | 1.275                   | 1.458                   | 1.362                   | 1.363                   | 4.176                   | 3.848                   | 1.008                   | 38.96      | 0.184 | 0.295                     | 0.77       |
| <b>42a</b> | $\text{CHCl}_3$ | 1.289                   | 1.445                   | 1.378                   | 1.338                   | 2.721                   | 1.938                   | 1.023                   | 35.00      | 0.116 | 0.371                     | 0.89       |
| <b>42b</b> |                 | 1.280                   | 1.460                   | 1.367                   | 1.348                   | 4.155                   | 4.747                   | 1.013                   | 38.88      | 0.161 | 0.321                     | 0.81       |
| <b>42c</b> |                 | 1.279                   | 1.451                   | 1.365                   | 1.352                   | 4.816                   | 5.037                   | 1.013                   | 49.00      | 0.159 | 0.322                     | 0.82       |
| <b>42d</b> |                 | 1.279                   | 1.455                   | 1.368                   | 1.354                   | 4.181                   | 3.851                   | 1.011                   | 38.44      | 0.162 | 0.320                     | 0.81       |
| <b>42a</b> | DMSO            | 1.290                   | 1.445                   | 1.381                   | 1.336                   | 2.713                   | 1.924                   | 1.023                   | 33.41      | 0.110 | 0.378                     | 0.89       |
| <b>42b</b> |                 | 1.282                   | 1.458                   | 1.370                   | 1.345                   | 4.157                   | 4.752                   | 1.014                   | 37.46      | 0.151 | 0.333                     | 0.83       |
| <b>42c</b> |                 | 1.283                   | 1.447                   | 1.368                   | 1.348                   | 4.815                   | 5.042                   | 1.014                   | 50.35      | 0.144 | 0.339                     | 0.85       |
| <b>42d</b> |                 | 1.282                   | 1.452                   | 1.372                   | 1.349                   | 4.191                   | 3.848                   | 1.013                   | 39.17      | 0.147 | 0.337                     | 0.84       |
| <b>42a</b> | EtOH            | 1.289                   | 1.446                   | 1.381                   | 1.336                   | 2.719                   | 1.932                   | 1.023                   | 33.65      | 0.112 | 0.376                     | 0.89       |
| <b>42b</b> |                 | 1.282                   | 1.458                   | 1.370                   | 1.345                   | 4.154                   | 4.750                   | 1.014                   | 36.77      | 0.151 | 0.333                     | 0.83       |
| <b>42c</b> |                 | 1.283                   | 1.448                   | 1.368                   | 1.348                   | 4.816                   | 5.042                   | 1.014                   | 49.96      | 0.145 | 0.338                     | 0.85       |
| <b>42d</b> |                 | 1.281                   | 1.453                   | 1.371                   | 1.350                   | 4.181                   | 3.833                   | 1.013                   | 39.94      | 0.151 | 0.332                     | 0.83       |
| <b>43a</b> | Gas-phase       | 1.287                   | 1.447                   | 1.369                   | 1.348                   | 2.715                   | 1.910                   | 1.023                   | 41.68      | 0.139 | 0.345                     | 0.86       |
| <b>43b</b> |                 | 1.277                   | 1.462                   | 1.357                   | 1.361                   | 4.161                   | 4.740                   | 1.012                   | 46.81      | 0.189 | 0.290                     | 0.76       |
| <b>43c</b> |                 | 1.275                   | 1.455                   | 1.356                   | 1.364                   | 4.805                   | 4.988                   | 1.012                   | 50.39      | 0.188 | 0.290                     | 0.77       |
| <b>43d</b> |                 | 1.276                   | 1.458                   | 1.358                   | 1.371                   | 4.169                   | 3.845                   | 1.009                   | 41.05      | 0.195 | 0.284                     | 0.75       |
| <b>43a</b> | $\text{CHCl}_3$ | 1.289                   | 1.446                   | 1.371                   | 1.348                   | 2.729                   | 1.940                   | 1.022                   | 39.08      | 0.134 | 0.351                     | 0.87       |
| <b>43b</b> |                 | 1.281                   | 1.458                   | 1.361                   | 1.356                   | 4.163                   | 4.750                   | 1.014                   | 45.44      | 0.172 | 0.309                     | 0.80       |
| <b>43c</b> |                 | 1.280                   | 1.449                   | 1.361                   | 1.359                   | 4.804                   | 5.002                   | 1.014                   | 51.71      | 0.167 | 0.313                     | 0.82       |
| <b>43d</b> |                 | 1.280                   | 1.454                   | 1.363                   | 1.364                   | 4.180                   | 3.859                   | 1.012                   | 39.59      | 0.175 | 0.306                     | 0.80       |
| <b>43a</b> | DMSO            | 1.290                   | 1.445                   | 1.374                   | 1.346                   | 2.708                   | 1.912                   | 1.024                   | 36.38      | 0.127 | 0.359                     | 0.88       |
| <b>43b</b> |                 | 1.282                   | 1.457                   | 1.362                   | 1.354                   | 4.163                   | 4.765                   | 1.015                   | 43.58      | 0.167 | 0.314                     | 0.81       |
| <b>43c</b> |                 | 1.284                   | 1.446                   | 1.362                   | 1.356                   | 4.803                   | 5.003                   | 1.015                   | 56.35      | 0.156 | 0.325                     | 0.84       |
| <b>43d</b> |                 | 1.282                   | 1.451                   | 1.365                   | 1.359                   | 4.191                   | 3.846                   | 1.013                   | 41.06      | 0.163 | 0.319                     | 0.82       |
| <b>43a</b> | EtOH            | 1.290                   | 1.445                   | 1.374                   | 1.347                   | 2.710                   | 1.915                   | 1.024                   | 41.05      | 0.128 | 0.358                     | 0.88       |
| <b>43b</b> |                 | 1.282                   | 1.457                   | 1.361                   | 1.355                   | 4.178                   | 4.780                   | 1.015                   | 44.96      | 0.169 | 0.312                     | 0.81       |
| <b>43c</b> |                 | 1.283                   | 1.446                   | 1.362                   | 1.357                   | 4.803                   | 5.010                   | 1.015                   | 52.49      | 0.158 | 0.323                     | 0.84       |
| <b>43d</b> |                 | 1.282                   | 1.452                   | 1.364                   | 1.360                   | 4.188                   | 3.841                   | 1.013                   | 41.79      | 0.166 | 0.316                     | 0.82       |

**Table S21.** Crystal data and structure refinement details for **14**.

|                                                                               |                                                                              |                                                                                     |
|-------------------------------------------------------------------------------|------------------------------------------------------------------------------|-------------------------------------------------------------------------------------|
| Empirical formula                                                             | C <sub>16</sub> H <sub>14</sub> N <sub>2</sub> O <sub>3</sub>                | 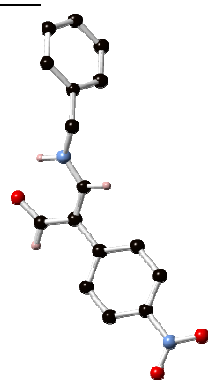 |
| Formula weight                                                                | 282.29                                                                       |                                                                                     |
| Temperature                                                                   | 100(2) K                                                                     |                                                                                     |
| Wavelength                                                                    | 0.71075 Å                                                                    |                                                                                     |
| Crystal system                                                                | Monoclinic                                                                   |                                                                                     |
| Space group                                                                   | <i>P</i> 2 <sub>1</sub> / <i>n</i>                                           |                                                                                     |
| Unit cell dimensions                                                          | <i>a</i> = 4.1847(19) Å<br><i>b</i> = 13.013(6) Å<br><i>c</i> = 24.919(11) Å | $\beta = 93.169(8)^\circ$                                                           |
| Volume                                                                        | 1354.9(10) Å <sup>3</sup>                                                    |                                                                                     |
| <i>Z</i>                                                                      | 4                                                                            |                                                                                     |
| Density (calculated)                                                          | 1.384 Mg / m <sup>3</sup>                                                    |                                                                                     |
| Absorption coefficient                                                        | 0.097 mm <sup>-1</sup>                                                       |                                                                                     |
| <i>F</i> (000)                                                                | 592                                                                          |                                                                                     |
| Crystal                                                                       | Fragment; Yellow                                                             |                                                                                     |
| Crystal size                                                                  | 0.23 × 0.21 × 0.07 mm <sup>3</sup>                                           |                                                                                     |
| $\theta$ range for data collection                                            | 2.91 – 25.02°                                                                |                                                                                     |
| Index ranges                                                                  | –4 ≤ <i>h</i> ≤ 4, –14 ≤ <i>k</i> ≤ 15, –29 ≤ <i>l</i> ≤ 29                  |                                                                                     |
| Reflections collected                                                         | 6477                                                                         |                                                                                     |
| Independent reflections                                                       | 2360 [ <i>R</i> <sub>int</sub> = 0.0338]                                     |                                                                                     |
| Completeness to $\theta = 25.02^\circ$                                        | 99.2 %                                                                       |                                                                                     |
| Absorption correction                                                         | Semi-empirical from equivalents                                              |                                                                                     |
| Max. and min. transmission                                                    | 0.9932 and 0.9780                                                            |                                                                                     |
| Refinement method                                                             | Full-matrix least-squares on <i>F</i> <sup>2</sup>                           |                                                                                     |
| Data / restraints / parameters                                                | 2360 / 0 / 194                                                               |                                                                                     |
| Goodness-of-fit on <i>F</i> <sup>2</sup>                                      | 1.119                                                                        |                                                                                     |
| Final <i>R</i> indices [ <i>F</i> <sup>2</sup> > 2σ( <i>F</i> <sup>2</sup> )] | <i>R</i> 1 = 0.0440, <i>wR</i> 2 = 0.1033                                    |                                                                                     |
| <i>R</i> indices (all data)                                                   | <i>R</i> 1 = 0.0553, <i>wR</i> 2 = 0.1089                                    |                                                                                     |
| Largest diff. peak and hole                                                   | 0.162 and –0.239 e Å <sup>-3</sup>                                           |                                                                                     |

**Diffractometer:** Rigaku AFC12 goniometer equipped with an enhanced sensitivity (HG) Saturn724+ detector mounted at the window of an FR-E+ SuperBright molybdenum rotating anode generator with HF Varimax optics (100µm focus). **Cell determination, Data collection, Data reduction and cell refinement & Absorption correction:** CrystalClear-SM Expert 2.0 r7 (Rigaku, 2011), **Structure solution:** SHELXS97 (G. M. Sheldrick, Acta Cryst. (1990) A46 467–473). **Structure refinement:** SHELXL97 (G. M. Sheldrick (1997), University of Göttingen, Germany). **Graphics:** CrystalMaker: a crystal and molecular structures program for Mac and Windows. CrystalMaker Software Ltd, Oxford, England (www.crystallmaker.com)

**Special details:** All hydrogen atoms were placed in idealised positions and refined using a riding model, except the NH which was freely refined.



**Table S22.** Atomic coordinates [ $\times 10^4$ ], equivalent isotropic displacement parameters [ $\text{\AA}^2 \times 10^3$ ] and site occupancy factors for **14**.

| Atom | <i>x</i> | <i>y</i> | <i>z</i> | $U_{eq}^a$ | <i>S.o.f.</i> |
|------|----------|----------|----------|------------|---------------|
| O1   | 826(3)   | 9045(1)  | 320(1)   | 21(1)      | 1             |
| O2   | -6036(4) | 4660(1)  | 2383(1)  | 36(1)      | 1             |
| O3   | -7782(4) | 5843(1)  | 2901(1)  | 38(1)      | 1             |
| N1   | -3207(4) | 10387(1) | 752(1)   | 18(1)      | 1             |
| N2   | -6436(4) | 5570(1)  | 2497(1)  | 25(1)      | 1             |
| C1   | -3623(5) | 12953(1) | 322(1)   | 22(1)      | 1             |
| C2   | -2081(5) | 13898(1) | 353(1)   | 26(1)      | 1             |
| C3   | -375(5)  | 14180(2) | 821(1)   | 27(1)      | 1             |
| C4   | -263(5)  | 13530(2) | 1260(1)  | 27(1)      | 1             |
| C5   | -1823(5) | 12594(1) | 1229(1)  | 23(1)      | 1             |
| C6   | -3515(4) | 12293(1) | 758(1)   | 18(1)      | 1             |
| C7   | -5295(5) | 11286(1) | 728(1)   | 20(1)      | 1             |
| C8   | -3649(4) | 9614(1)  | 1078(1)  | 18(1)      | 1             |
| C9   | -2164(4) | 8651(1)  | 1072(1)  | 17(1)      | 1             |
| C10  | 18(4)    | 8435(1)  | 671(1)   | 18(1)      | 1             |
| C11  | -3133(4) | 7856(1)  | 1450(1)  | 18(1)      | 1             |
| C12  | -4427(5) | 8115(1)  | 1941(1)  | 21(1)      | 1             |
| C13  | -5549(5) | 7379(1)  | 2277(1)  | 22(1)      | 1             |
| C14  | -5265(5) | 6352(1)  | 2143(1)  | 20(1)      | 1             |
| C15  | -3937(5) | 6056(1)  | 1673(1)  | 22(1)      | 1             |
| C16  | -2919(5) | 6802(1)  | 1328(1)  | 21(1)      | 1             |

<sup>a</sup>  $U_{eq}$  is defined as one third of the trace of the orthogonalized  $U^{ij}$  tensor.

**Table S23.** Bond lengths [Å] and angles [°] for **14**.**Bond lengths [Å]**

---

|        |          |         |          |
|--------|----------|---------|----------|
| O1–C10 | 1.241(2) | C5–C6   | 1.393(3) |
| O2–N2  | 1.231(2) | C6–C7   | 1.508(3) |
| O3–N2  | 1.234(2) | C8–C9   | 1.399(3) |
| N1–C8  | 1.311(2) | C9–C10  | 1.419(3) |
| N1–C7  | 1.460(2) | C9–C11  | 1.471(3) |
| N2–C14 | 1.450(2) | C11–C12 | 1.405(3) |
| C1–C6  | 1.384(3) | C11–C16 | 1.409(3) |
| C1–C2  | 1.388(3) | C12–C13 | 1.372(3) |
| C2–C3  | 1.384(3) | C13–C14 | 1.385(3) |
| C3–C4  | 1.380(3) | C14–C15 | 1.379(3) |
| C4–C5  | 1.382(3) | C15–C16 | 1.380(3) |

**Angles [°]**

|           |            |             |            |
|-----------|------------|-------------|------------|
| C8–N1–C7  | 122.38(17) | C8–C9–C10   | 119.20(17) |
| O2–N2–O3  | 122.65(17) | C8–C9–C11   | 119.04(18) |
| O2–N2–C14 | 118.68(17) | C10–C9–C11  | 121.50(17) |
| O3–N2–C14 | 118.68(16) | O1–C10–C9   | 125.44(18) |
| C6–C1–C2  | 120.71(18) | C12–C11–C16 | 116.94(17) |
| C3–C2–C1  | 119.94(19) | C12–C11–C9  | 121.45(17) |
| C4–C3–C2  | 119.82(19) | C16–C11–C9  | 121.56(17) |
| C3–C4–C5  | 120.11(19) | C13–C12–C11 | 121.73(18) |
| C4–C5–C6  | 120.72(18) | C12–C13–C14 | 119.29(18) |
| C1–C6–C5  | 118.71(17) | C15–C14–C13 | 121.24(18) |
| C1–C6–C7  | 120.41(17) | C15–C14–N2  | 119.14(17) |
| C5–C6–C7  | 120.84(17) | C13–C14–N2  | 119.61(18) |
| N1–C7–C6  | 113.69(16) | C14–C15–C16 | 119.02(17) |
| N1–C8–C9  | 127.08(19) | C15–C16–C11 | 121.71(18) |

---

**Table S24.** Anisotropic displacement parameters [ $\text{\AA}^2 \times 10^3$ ] for **14**. The anisotropic displacement factor exponent takes the form:  $-2\pi^2[h^2 a^{*2} U^{11} + \dots + 2 h k a^* b^* U^{12}]$ .

| Atom | $U^{11}$ | $U^{22}$ | $U^{33}$ | $U^{23}$ | $U^{13}$ | $U^{12}$ |
|------|----------|----------|----------|----------|----------|----------|
| O1   | 24(1)    | 20(1)    | 19(1)    | 3(1)     | 3(1)     | -2(1)    |
| O2   | 54(1)    | 17(1)    | 36(1)    | 3(1)     | 12(1)    | -4(1)    |
| O3   | 61(1)    | 30(1)    | 24(1)    | 2(1)     | 18(1)    | -8(1)    |
| N1   | 21(1)    | 14(1)    | 18(1)    | 2(1)     | 4(1)     | 0(1)     |
| N2   | 32(1)    | 22(1)    | 21(1)    | 2(1)     | 3(1)     | -4(1)    |
| C1   | 21(1)    | 23(1)    | 22(1)    | 1(1)     | 4(1)     | 2(1)     |
| C2   | 30(1)    | 20(1)    | 30(1)    | 7(1)     | 11(1)    | 2(1)     |
| C3   | 28(1)    | 15(1)    | 38(1)    | -4(1)    | 10(1)    | -2(1)    |
| C4   | 27(1)    | 22(1)    | 30(1)    | -8(1)    | -1(1)    | 1(1)     |
| C5   | 27(1)    | 19(1)    | 23(1)    | 2(1)     | 1(1)     | 5(1)     |
| C6   | 16(1)    | 15(1)    | 23(1)    | 0(1)     | 6(1)     | 3(1)     |
| C7   | 20(1)    | 17(1)    | 23(1)    | 2(1)     | 4(1)     | 2(1)     |
| C8   | 19(1)    | 20(1)    | 17(1)    | 0(1)     | 2(1)     | -4(1)    |
| C9   | 20(1)    | 15(1)    | 17(1)    | 0(1)     | -1(1)    | -1(1)    |
| C10  | 18(1)    | 18(1)    | 19(1)    | 0(1)     | -1(1)    | -1(1)    |
| C11  | 16(1)    | 18(1)    | 19(1)    | 1(1)     | 0(1)     | 0(1)     |
| C12  | 28(1)    | 16(1)    | 20(1)    | 0(1)     | 2(1)     | 0(1)     |
| C13  | 29(1)    | 22(1)    | 14(1)    | -1(1)    | 2(1)     | -1(1)    |
| C14  | 24(1)    | 19(1)    | 18(1)    | 5(1)     | 2(1)     | -1(1)    |
| C15  | 26(1)    | 15(1)    | 25(1)    | 0(1)     | 4(1)     | 2(1)     |
| C16  | 25(1)    | 19(1)    | 18(1)    | 0(1)     | 6(1)     | 2(1)     |

**Table S25.** Hydrogen coordinates [ $\times 10^4$ ] and isotropic displacement parameters [ $\text{\AA}^2 \times 10^3$ ] for **14**.

| Atom | x         | y         | z      | $U_{eq}$ | S.o.f. |
|------|-----------|-----------|--------|----------|--------|
| H901 | -1760(50) | 10263(16) | 478(9) | 38(7)    | 1      |
| H1   | -4765     | 12758     | -2     | 26       | 1      |
| H2   | -2196     | 14349     | 53     | 31       | 1      |
| H3   | 716       | 14821     | 841    | 32       | 1      |
| H4   | 889       | 13726     | 1583   | 32       | 1      |
| H5   | -1740     | 12151     | 1532   | 27       | 1      |
| H7A  | -6741     | 11252     | 1029   | 24       | 1      |
| H7B  | -6639     | 11264     | 389    | 24       | 1      |
| H8   | -5139     | 9720      | 1346   | 22       | 1      |
| H10  | 936       | 7767      | 670    | 22       | 1      |
| H12  | -4528     | 8817      | 2042   | 25       | 1      |
| H13  | -6509     | 7573      | 2599   | 26       | 1      |
| H15  | -3726     | 5348      | 1587   | 26       | 1      |
| H16  | -2051     | 6601      | 1000   | 25       | 1      |

**Table S26.** Hydrogen bonds [ $\text{\AA}$  and  $^\circ$ ] for **14**.

| $D-H\cdots A$                    | $d(D-H)$ | $d(H\cdots A)$ | $d(D\cdots A)$ | $\angle(DHA)$ |
|----------------------------------|----------|----------------|----------------|---------------|
| N1-H901 $\cdots$ O1              | 0.95(2)  | 1.97(2)        | 2.694(2)       | 131.1(18)     |
| N1-H901 $\cdots$ O1 <sup>i</sup> | 0.95(2)  | 2.24(2)        | 2.996(2)       | 136.1(18)     |

Symmetry transformations used to generate equivalent atoms: (i)  $-x, -y+2, -z$

**Table S27.** Crystal data and structure refinement details for **30**.

|                                                                               |                                                               |                                                                                     |
|-------------------------------------------------------------------------------|---------------------------------------------------------------|-------------------------------------------------------------------------------------|
| Empirical formula                                                             | C <sub>21</sub> H <sub>17</sub> N <sub>3</sub> O <sub>2</sub> | 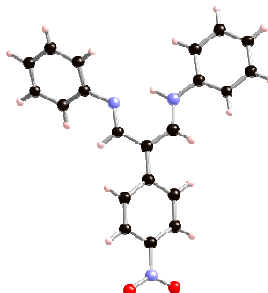 |
| Formula weight                                                                | 343.38                                                        |                                                                                     |
| Temperature                                                                   | 100(2) K                                                      |                                                                                     |
| Wavelength                                                                    | 0.71073 Å                                                     | $\beta = 109.782(9)^\circ$                                                          |
| Crystal system                                                                | Monoclinic                                                    |                                                                                     |
| Space group                                                                   | <i>P</i> 2 <sub>1</sub> / <i>c</i>                            |                                                                                     |
| Unit cell dimensions                                                          | $a = 8.649(7)$ Å<br>$b = 21.553(15)$ Å<br>$c = 9.886(8)$ Å    |                                                                                     |
| Volume                                                                        | 1734(2) Å <sup>3</sup>                                        |                                                                                     |
| <i>Z</i>                                                                      | 4                                                             |                                                                                     |
| Density (calculated)                                                          | 1.315 Mg / m <sup>3</sup>                                     |                                                                                     |
| Absorption coefficient                                                        | 0.087 mm <sup>-1</sup>                                        |                                                                                     |
| <i>F</i> (000)                                                                | 720                                                           |                                                                                     |
| Crystal                                                                       | Slab; Orange                                                  |                                                                                     |
| Crystal size                                                                  | 0.11 × 0.08 × 0.05 mm <sup>3</sup>                            |                                                                                     |
| $\theta$ range for data collection                                            | 3.14 – 25.02°                                                 |                                                                                     |
| Index ranges                                                                  | –10 ≤ <i>h</i> ≤ 7, –25 ≤ <i>k</i> ≤ 23, –8 ≤ <i>l</i> ≤ 11   |                                                                                     |
| Reflections collected                                                         | 6840                                                          |                                                                                     |
| Independent reflections                                                       | 3031 [ <i>R</i> <sub>int</sub> = 0.0581]                      |                                                                                     |
| Completeness to $\theta = 25.02^\circ$                                        | 99.1 %                                                        |                                                                                     |
| Absorption correction                                                         | Semi-empirical from equivalents                               |                                                                                     |
| Max. and min. transmission                                                    | 0.9957 and 0.9905                                             |                                                                                     |
| Refinement method                                                             | Full-matrix least-squares on <i>F</i> <sup>2</sup>            |                                                                                     |
| Data / restraints / parameters                                                | 3031 / 0 / 239                                                |                                                                                     |
| Goodness-of-fit on <i>F</i> <sup>2</sup>                                      | 1.208                                                         |                                                                                     |
| Final <i>R</i> indices [ <i>F</i> <sup>2</sup> > 2σ( <i>F</i> <sup>2</sup> )] | <i>R</i> 1 = 0.0889, <i>wR</i> 2 = 0.1428                     |                                                                                     |
| <i>R</i> indices (all data)                                                   | <i>R</i> 1 = 0.1207, <i>wR</i> 2 = 0.1557                     |                                                                                     |
| Largest diff. peak and hole                                                   | 0.185 and –0.205 e Å <sup>-3</sup>                            |                                                                                     |

**Diffraction:** Rigaku AFC11 and Saturn944+ mounted at the window of RA-Micro7 HFM with Varimax optics. **Cell determination, Data collection, Data reduction and cell refinement & Absorption correction:** CrystalClear-SM Expert 2.0 r7 (Rigaku, 2011), **Structure solution:** SHELXS97 (G. M. Sheldrick, Acta Cryst. (1990) A46 467–473). **Structure refinement:** SHELXL97 (G. M. Sheldrick (1997), University of Göttingen, Germany). **Graphics:** CrystalMaker: a crystal and molecular structures program for Mac and Windows. CrystalMaker Software Ltd, Oxford, England (www.crystallmaker.com)

**Special details:** All hydrogen atoms were placed in idealised positions and refined using a riding model, except the NH hydrogen which was freely refined.

**Table S28.** Atomic coordinates [ $\times 10^4$ ], equivalent isotropic displacement parameters [ $\text{\AA}^2 \times 10^3$ ] and site occupancy factors for **30**.

| Atom | <i>x</i> | <i>y</i> | <i>z</i> | $U_{eq}^a$ | <i>S.o.f.</i> |
|------|----------|----------|----------|------------|---------------|
| O1   | -3695(3) | 10275(1) | 7303(3)  | 47(1)      | 1             |
| O2   | -3275(3) | 10674(1) | 5443(3)  | 52(1)      | 1             |
| N1   | -3190(3) | 10238(1) | 6282(3)  | 36(1)      | 1             |
| N2   | -587(3)  | 6824(1)  | 5445(3)  | 27(1)      | 1             |
| N3   | 1379(3)  | 7397(1)  | 4287(3)  | 28(1)      | 1             |
| C1   | -2460(4) | 9655(2)  | 6039(4)  | 29(1)      | 1             |
| C2   | -2323(4) | 9162(2)  | 6984(3)  | 28(1)      | 1             |
| C3   | -1633(4) | 8614(2)  | 6734(3)  | 29(1)      | 1             |
| C4   | -1099(4) | 8538(2)  | 5541(3)  | 26(1)      | 1             |
| C5   | -1243(4) | 9056(2)  | 4639(3)  | 31(1)      | 1             |
| C6   | -1908(4) | 9610(2)  | 4877(4)  | 35(1)      | 1             |
| C7   | -455(4)  | 7937(2)  | 5243(3)  | 25(1)      | 1             |
| C8   | -1064(4) | 7379(2)  | 5652(3)  | 26(1)      | 1             |
| C9   | -1396(4) | 6290(2)  | 5748(3)  | 27(1)      | 1             |
| C10  | -3035(4) | 6296(2)  | 5700(3)  | 27(1)      | 1             |
| C11  | -3758(4) | 5753(2)  | 5964(3)  | 30(1)      | 1             |
| C12  | -2878(4) | 5199(2)  | 6243(3)  | 33(1)      | 1             |
| C13  | -1267(4) | 5191(2)  | 6273(3)  | 31(1)      | 1             |
| C14  | -526(4)  | 5729(2)  | 6031(3)  | 30(1)      | 1             |
| C15  | 728(4)   | 7921(2)  | 4586(3)  | 28(1)      | 1             |
| C16  | 2614(4)  | 7343(2)  | 3651(3)  | 29(1)      | 1             |
| C17  | 2883(4)  | 6755(2)  | 3181(3)  | 32(1)      | 1             |
| C18  | 4037(4)  | 6682(2)  | 2497(4)  | 39(1)      | 1             |
| C19  | 4920(4)  | 7181(2)  | 2289(4)  | 41(1)      | 1             |
| C20  | 4680(4)  | 7762(2)  | 2790(4)  | 40(1)      | 1             |
| C21  | 3524(4)  | 7849(2)  | 3461(4)  | 35(1)      | 1             |

<sup>a</sup>  $U_{eq}$  is defined as one third of the trace of the orthogonalized  $U^{ij}$  tensor.

**Table S29.** Bond lengths [Å] and angles [°] for **30**.

---

**Bond lengths [Å]**

|        |          |         |          |
|--------|----------|---------|----------|
| O1–N1  | 1.231(3) | C7–C15  | 1.385(4) |
| O2–N1  | 1.240(3) | C7–C8   | 1.426(4) |
| N1–C1  | 1.462(4) | C9–C14  | 1.401(4) |
| N2–C8  | 1.302(4) | C9–C10  | 1.402(4) |
| N2–C9  | 1.431(4) | C10–C11 | 1.393(4) |
| N3–C15 | 1.339(4) | C11–C12 | 1.392(4) |
| N3–C16 | 1.416(4) | C12–C13 | 1.383(5) |
| C1–C6  | 1.388(4) | C13–C14 | 1.385(4) |
| C1–C2  | 1.393(4) | C16–C21 | 1.394(4) |
| C2–C3  | 1.384(4) | C16–C17 | 1.395(4) |
| C3–C4  | 1.414(4) | C17–C18 | 1.392(4) |
| C4–C5  | 1.408(4) | C18–C19 | 1.376(5) |
| C4–C7  | 1.478(4) | C19–C20 | 1.387(5) |
| C5–C6  | 1.379(4) | C20–C21 | 1.387(4) |

**Angles [°]**

|            |          |             |          |
|------------|----------|-------------|----------|
| O1–N1–O2   | 122.8(3) | N2–C8–C7    | 124.3(3) |
| O1–N1–C1   | 119.0(3) | C14–C9–C10  | 118.9(3) |
| O2–N1–C1   | 118.2(3) | C14–C9–N2   | 117.9(3) |
| C8–N2–C9   | 120.1(3) | C10–C9–N2   | 123.1(3) |
| C15–N3–C16 | 127.3(3) | C11–C10–C9  | 120.0(3) |
| C6–C1–C2   | 121.8(3) | C10–C11–C12 | 120.5(3) |
| C6–C1–N1   | 118.9(3) | C13–C12–C11 | 119.6(3) |
| C2–C1–N1   | 119.2(3) | C12–C13–C14 | 120.5(3) |
| C3–C2–C1   | 118.4(3) | C13–C14–C9  | 120.6(3) |
| C2–C3–C4   | 122.0(3) | N3–C15–C7   | 123.9(3) |
| C5–C4–C3   | 116.9(3) | C21–C16–C17 | 120.0(3) |
| C5–C4–C7   | 121.9(3) | C21–C16–N3  | 122.7(3) |
| C3–C4–C7   | 121.2(3) | C17–C16–N3  | 117.3(3) |
| C6–C5–C4   | 122.1(3) | C18–C17–C16 | 119.5(3) |
| C5–C6–C1   | 118.7(3) | C19–C18–C17 | 120.6(4) |
| C15–C7–C8  | 120.9(3) | C18–C19–C20 | 119.7(3) |
| C15–C7–C4  | 120.1(3) | C19–C20–C21 | 120.8(3) |
| C8–C7–C4   | 118.9(3) | C20–C21–C16 | 119.4(3) |

---

**Table S30.** Anisotropic displacement parameters [ $\text{\AA}^2 \times 10^3$ ] for **30**. The anisotropic displacement factor exponent takes the form:  $-2\pi^2[h^2 a^{*2} U^{11} + \dots + 2 h k a^* b^* U^{12}]$ .

| Atom | $U^{11}$ | $U^{22}$ | $U^{33}$ | $U^{23}$ | $U^{13}$ | $U^{12}$ |
|------|----------|----------|----------|----------|----------|----------|
| O1   | 57(2)    | 47(2)    | 50(2)    | -3(1)    | 35(2)    | 8(1)     |
| O2   | 79(2)    | 36(2)    | 45(2)    | 8(1)     | 29(2)    | 14(2)    |
| N1   | 34(2)    | 41(2)    | 34(2)    | -5(2)    | 13(2)    | -1(2)    |
| N2   | 26(2)    | 33(2)    | 24(2)    | 0(1)     | 13(1)    | -2(1)    |
| N3   | 26(2)    | 34(2)    | 31(2)    | -1(1)    | 17(1)    | -1(1)    |
| C1   | 26(2)    | 30(2)    | 31(2)    | -4(2)    | 10(2)    | 0(2)     |
| C2   | 24(2)    | 40(2)    | 24(2)    | -4(2)    | 14(2)    | -4(2)    |
| C3   | 30(2)    | 34(2)    | 27(2)    | -1(2)    | 15(2)    | -3(2)    |
| C4   | 22(2)    | 34(2)    | 24(2)    | -3(2)    | 11(2)    | -5(2)    |
| C5   | 32(2)    | 41(2)    | 25(2)    | 2(2)     | 16(2)    | 0(2)     |
| C6   | 35(2)    | 41(2)    | 30(2)    | 1(2)     | 15(2)    | -2(2)    |
| C7   | 24(2)    | 32(2)    | 20(2)    | 1(1)     | 7(2)     | -3(2)    |
| C8   | 23(2)    | 37(2)    | 20(2)    | -1(2)    | 9(2)     | 3(2)     |
| C9   | 30(2)    | 31(2)    | 21(2)    | -1(2)    | 11(2)    | 3(2)     |
| C10  | 24(2)    | 33(2)    | 25(2)    | -5(2)    | 10(2)    | 0(2)     |
| C11  | 30(2)    | 37(2)    | 25(2)    | -5(2)    | 12(2)    | -6(2)    |
| C12  | 41(2)    | 34(2)    | 24(2)    | -4(2)    | 10(2)    | -7(2)    |
| C13  | 37(2)    | 29(2)    | 28(2)    | -4(2)    | 11(2)    | 4(2)     |
| C14  | 30(2)    | 40(2)    | 23(2)    | -4(2)    | 11(2)    | 3(2)     |
| C15  | 26(2)    | 31(2)    | 27(2)    | 2(2)     | 8(2)     | -3(2)    |
| C16  | 19(2)    | 46(2)    | 22(2)    | 2(2)     | 8(2)     | 1(2)     |
| C17  | 24(2)    | 43(2)    | 29(2)    | -1(2)    | 8(2)     | 2(2)     |
| C18  | 26(2)    | 60(3)    | 30(2)    | 0(2)     | 9(2)     | 12(2)    |
| C19  | 29(2)    | 68(3)    | 31(2)    | 9(2)     | 18(2)    | 13(2)    |
| C20  | 32(2)    | 52(3)    | 41(2)    | 12(2)    | 20(2)    | 3(2)     |
| C21  | 33(2)    | 45(2)    | 34(2)    | 6(2)     | 20(2)    | 3(2)     |



**Table 31.** Hydrogen coordinates [ $\times 10^4$ ] and isotropic displacement parameters [ $\text{\AA}^2 \times 10^3$ ] for **30**.

| Atom | x       | y        | z        | $U_{eq}$ | <i>S.o.f.</i> |
|------|---------|----------|----------|----------|---------------|
| H93  | 940(40) | 7032(16) | 4590(40) | 56(12)   | 1             |
| H2   | -2694   | 9201     | 7781     | 33       | 1             |
| H3   | -1514   | 8278     | 7383     | 35       | 1             |
| H5   | -871    | 9024     | 3841     | 37       | 1             |
| H6   | -1986   | 9955     | 4258     | 41       | 1             |
| H8   | -1870   | 7413     | 6104     | 32       | 1             |
| H10  | -3651   | 6670     | 5488     | 32       | 1             |
| H11  | -4861   | 5760     | 5953     | 36       | 1             |
| H12  | -3380   | 4829     | 6411     | 40       | 1             |
| H13  | -665    | 4813     | 6461     | 37       | 1             |
| H14  | 582     | 5718     | 6058     | 36       | 1             |
| H15  | 1098    | 8305     | 4333     | 34       | 1             |
| H17  | 2282    | 6408     | 3328     | 38       | 1             |
| H18  | 4216    | 6282     | 2170     | 47       | 1             |
| H19  | 5690    | 7129     | 1804     | 49       | 1             |
| H20  | 5315    | 8104     | 2673     | 48       | 1             |
| H21  | 3353    | 8249     | 3788     | 42       | 1             |

2. Copies of IR, <sup>1</sup>HNMR and <sup>13</sup>CNMR spectra for all prepared compounds:

Compound 13:

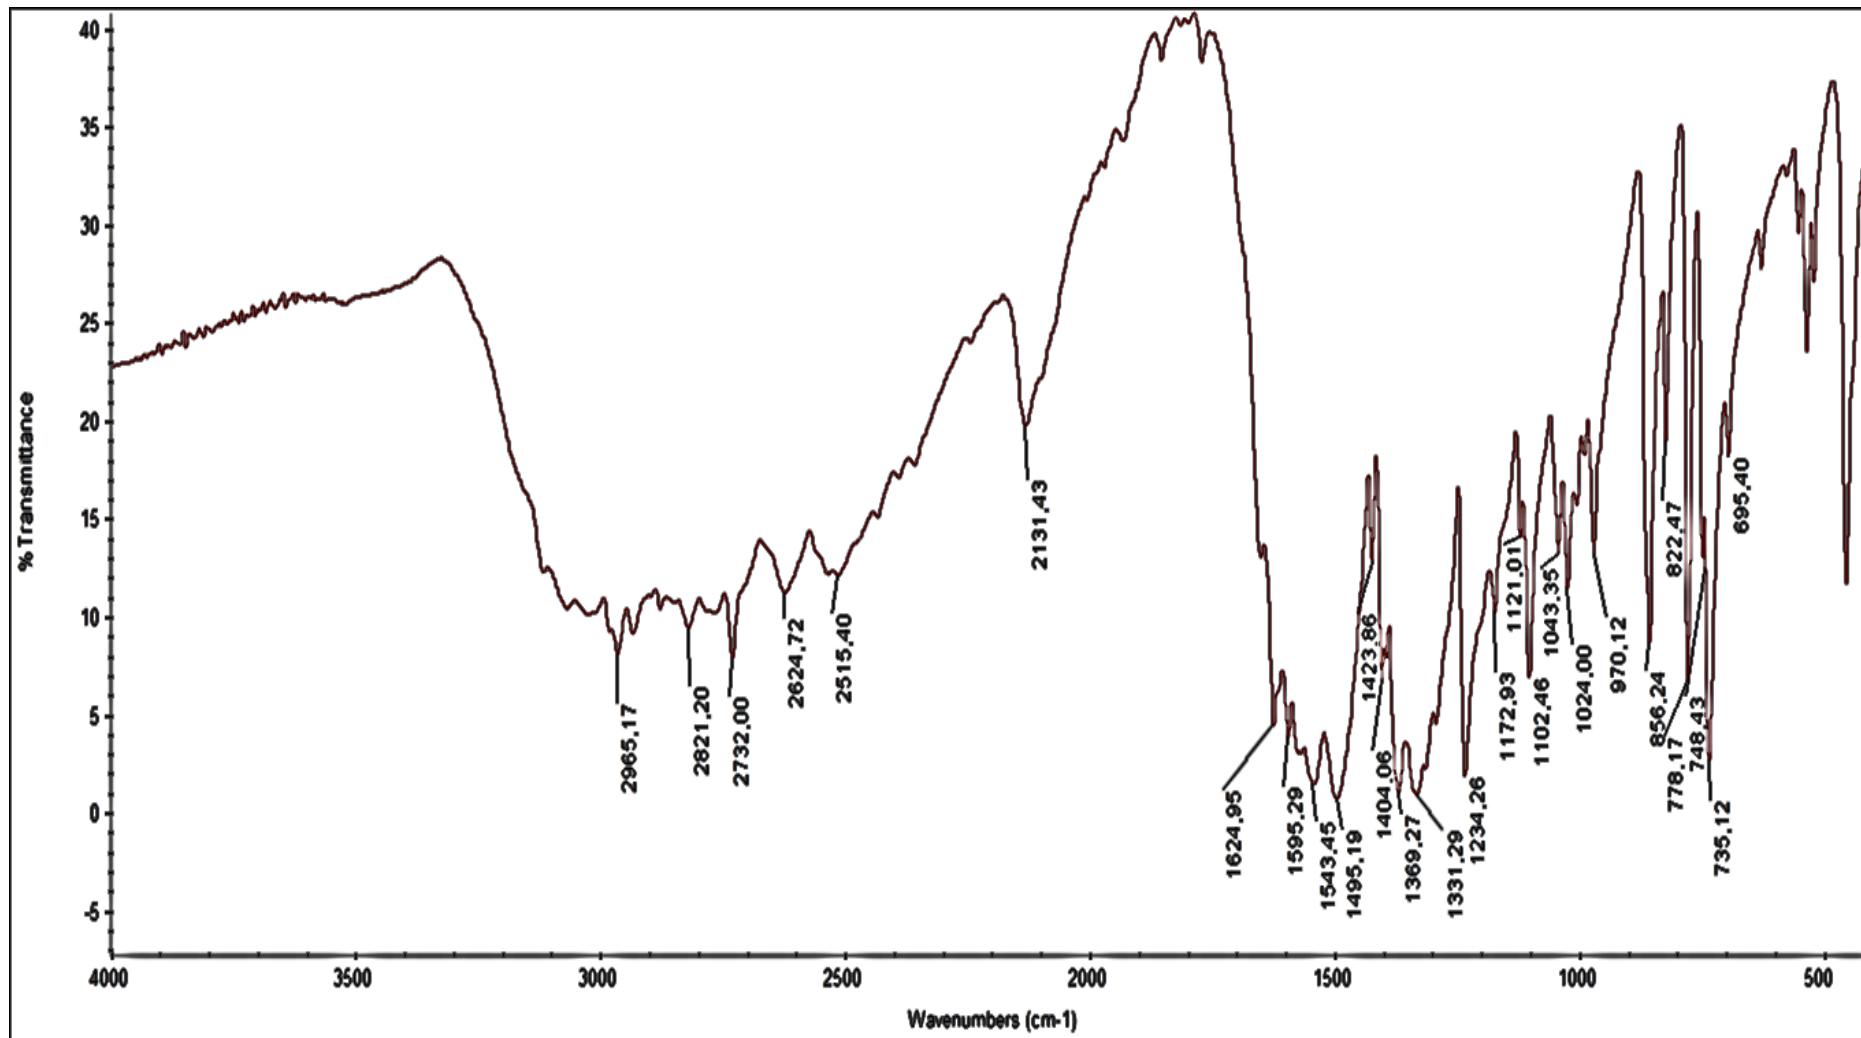

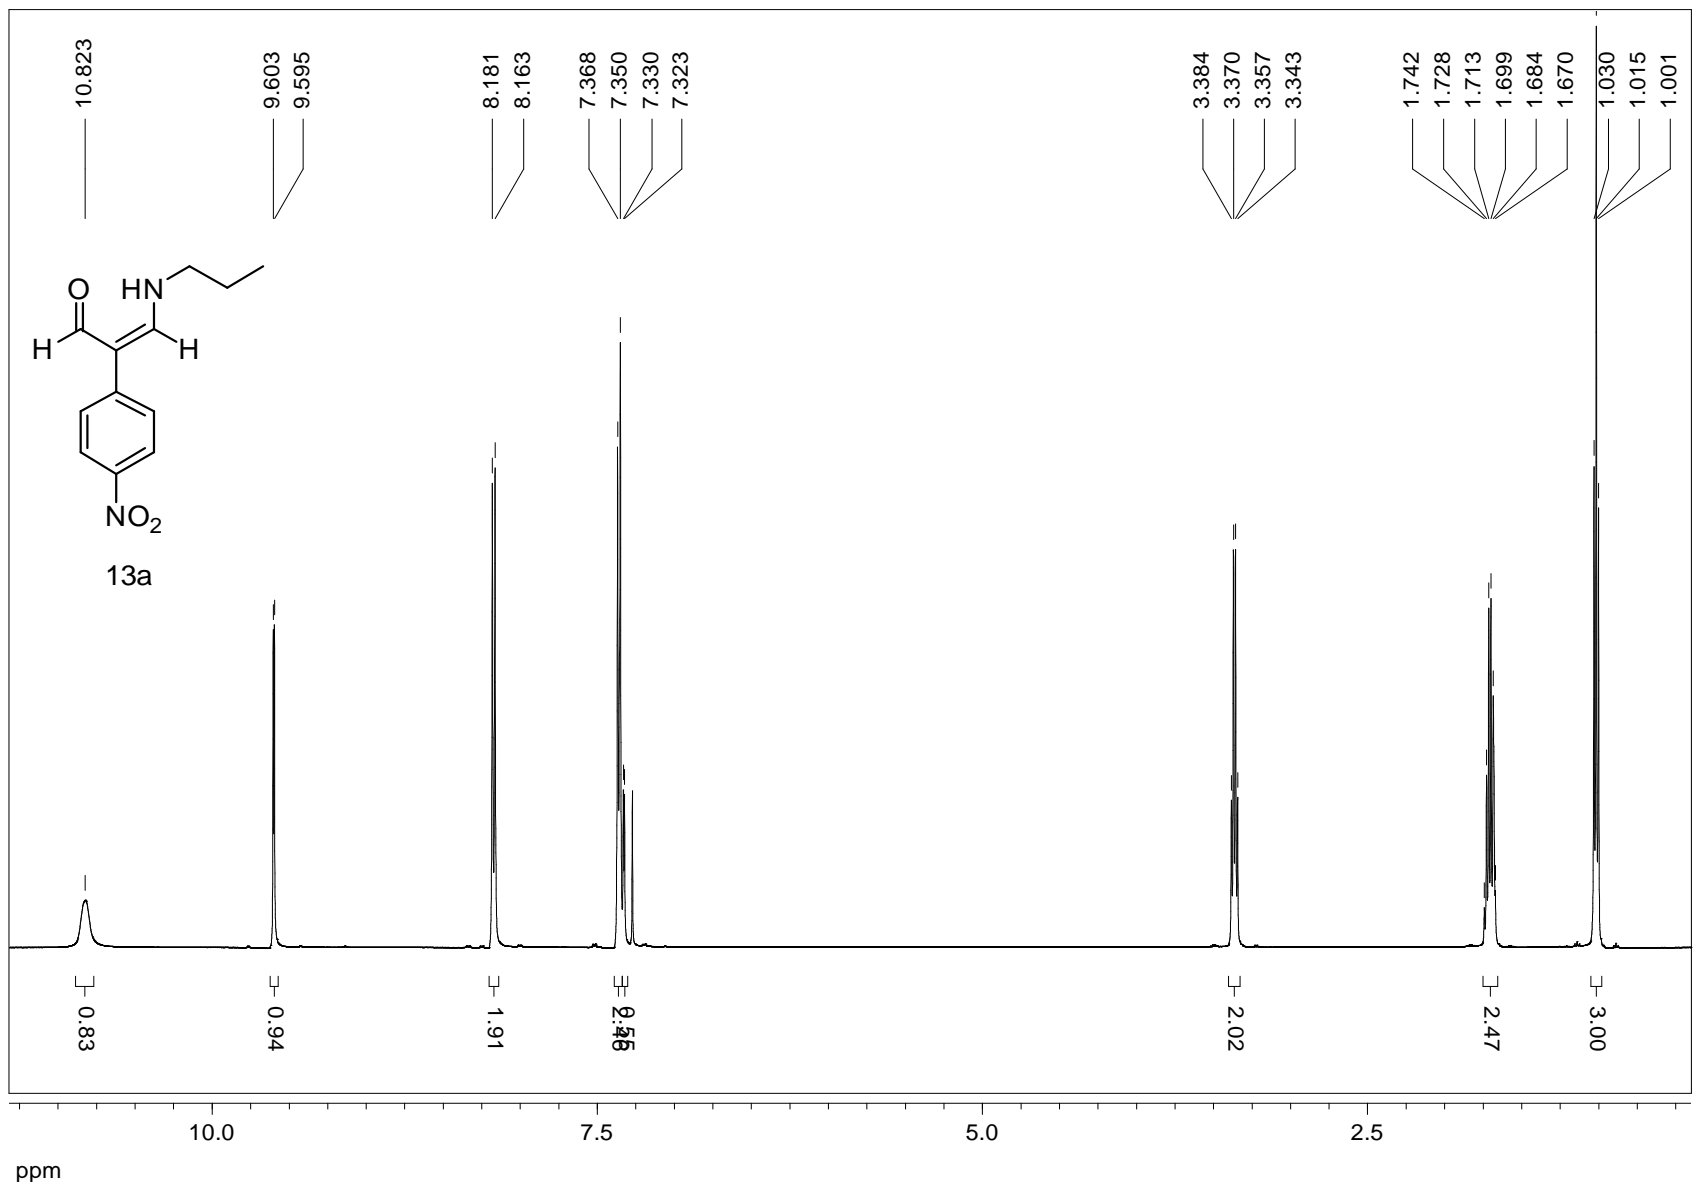

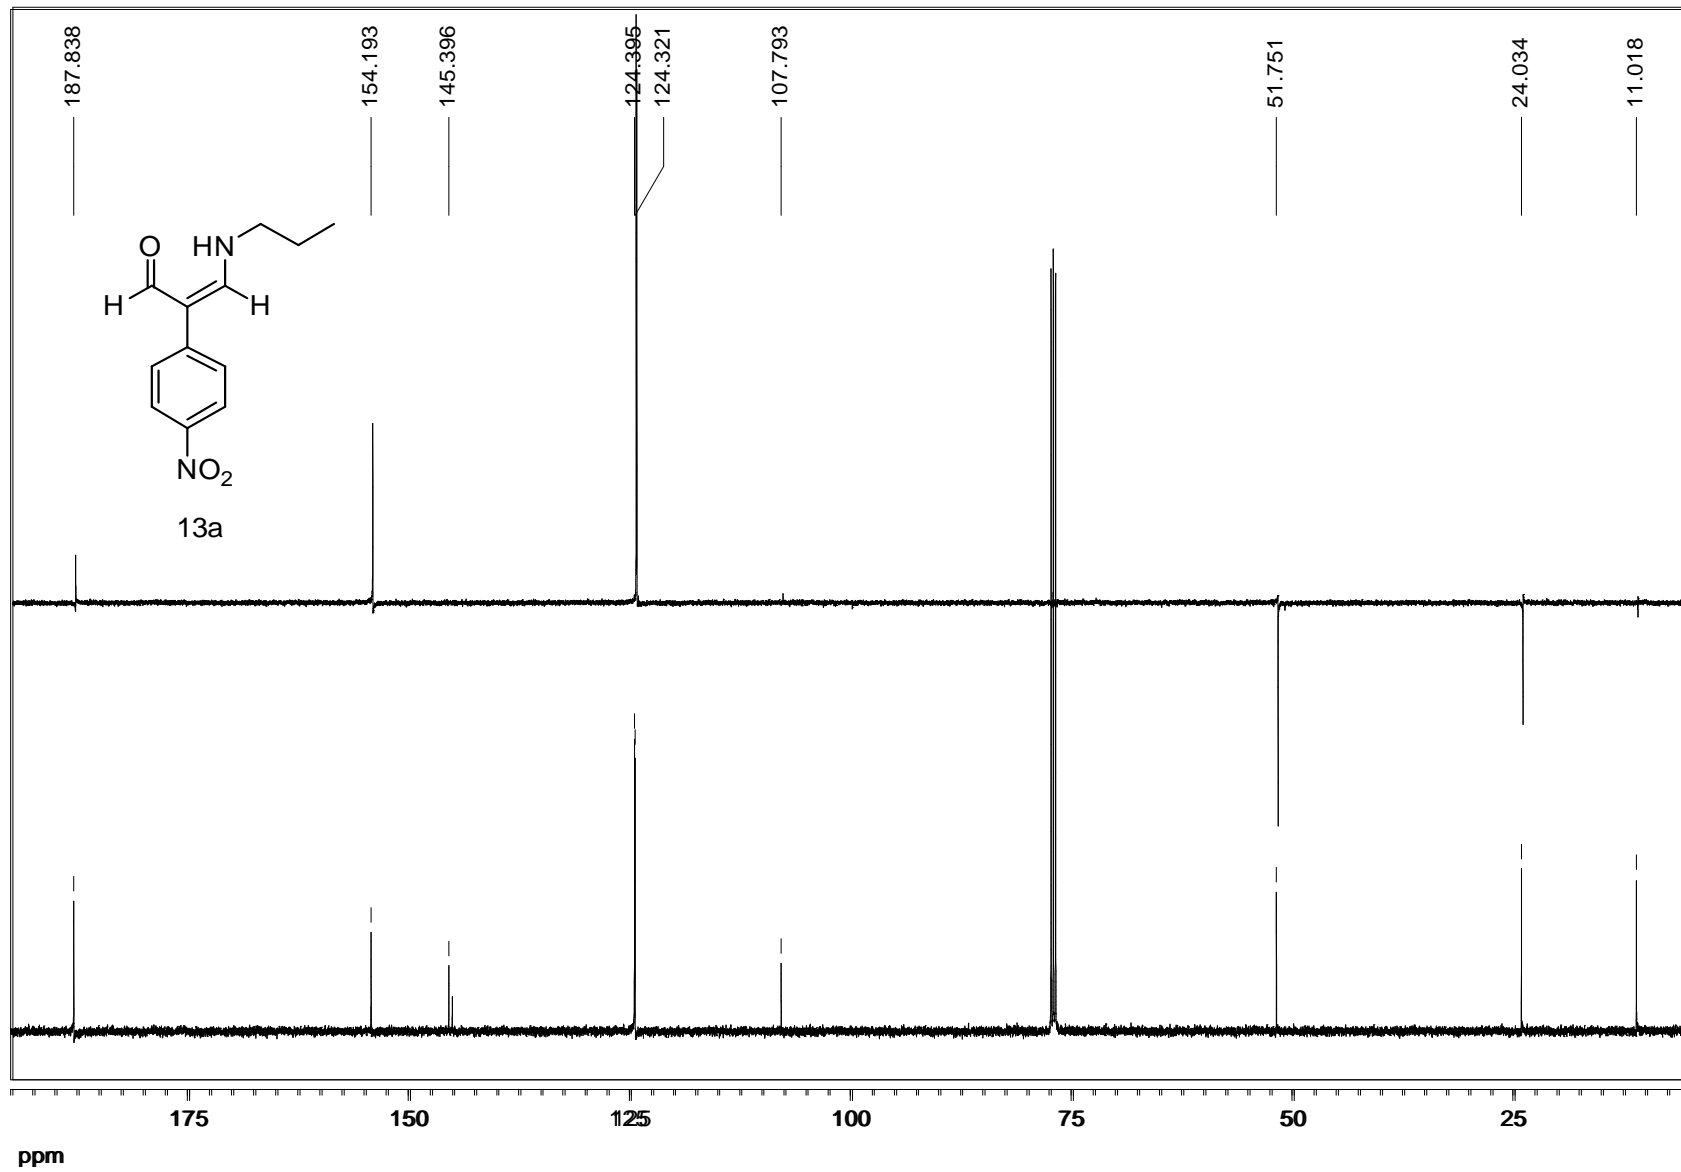

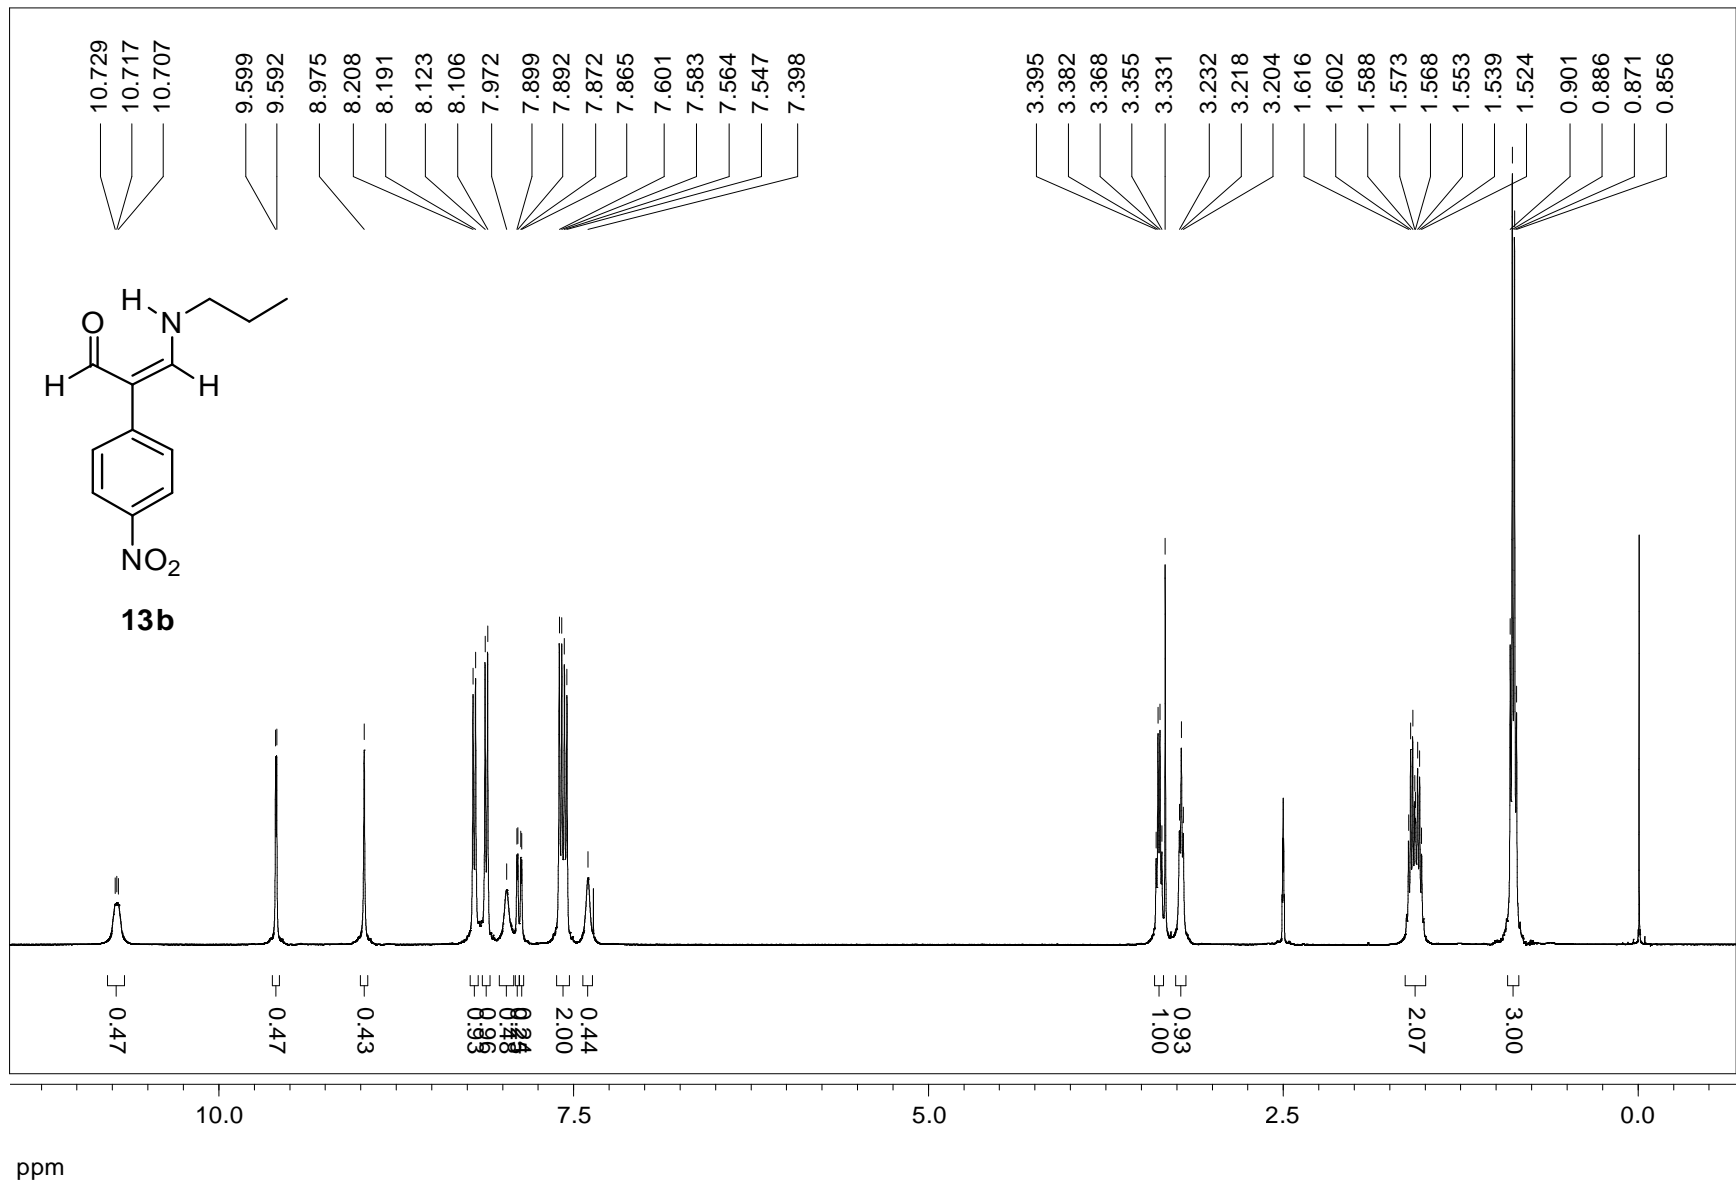

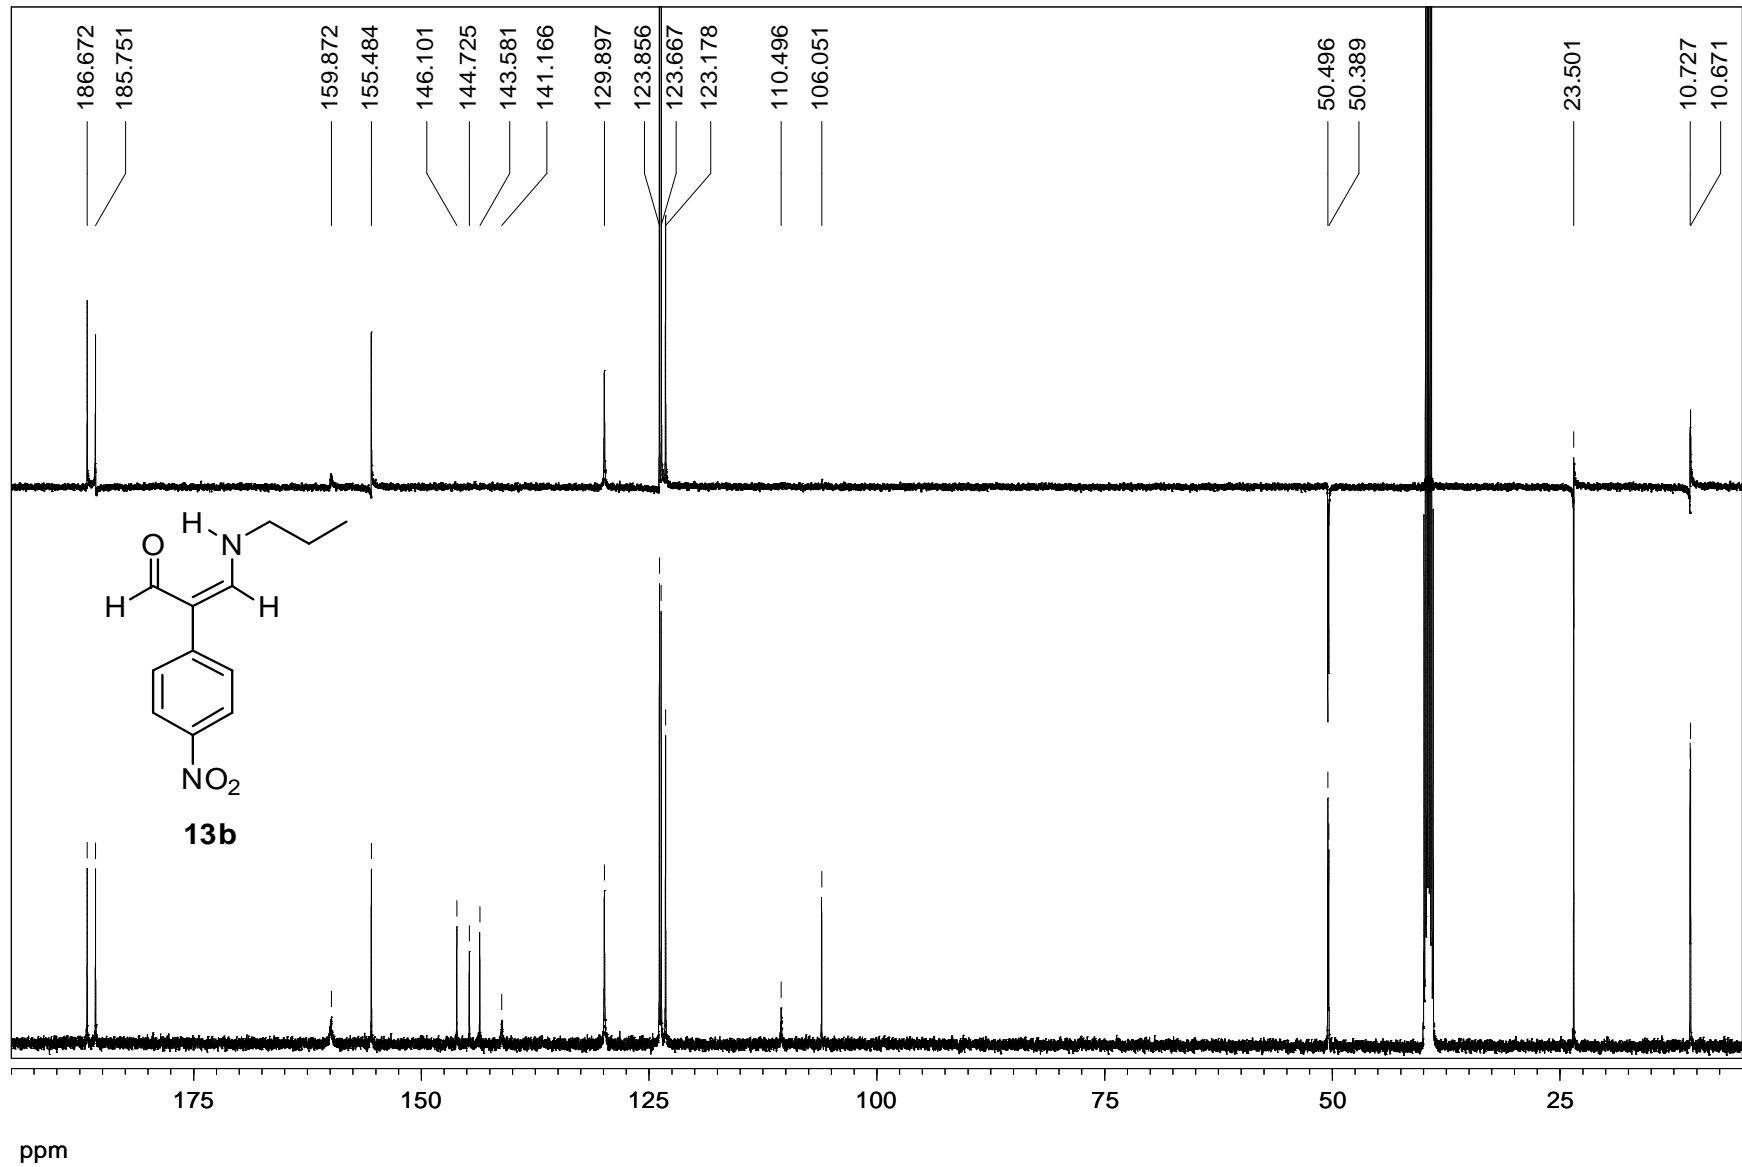

Compound 14:

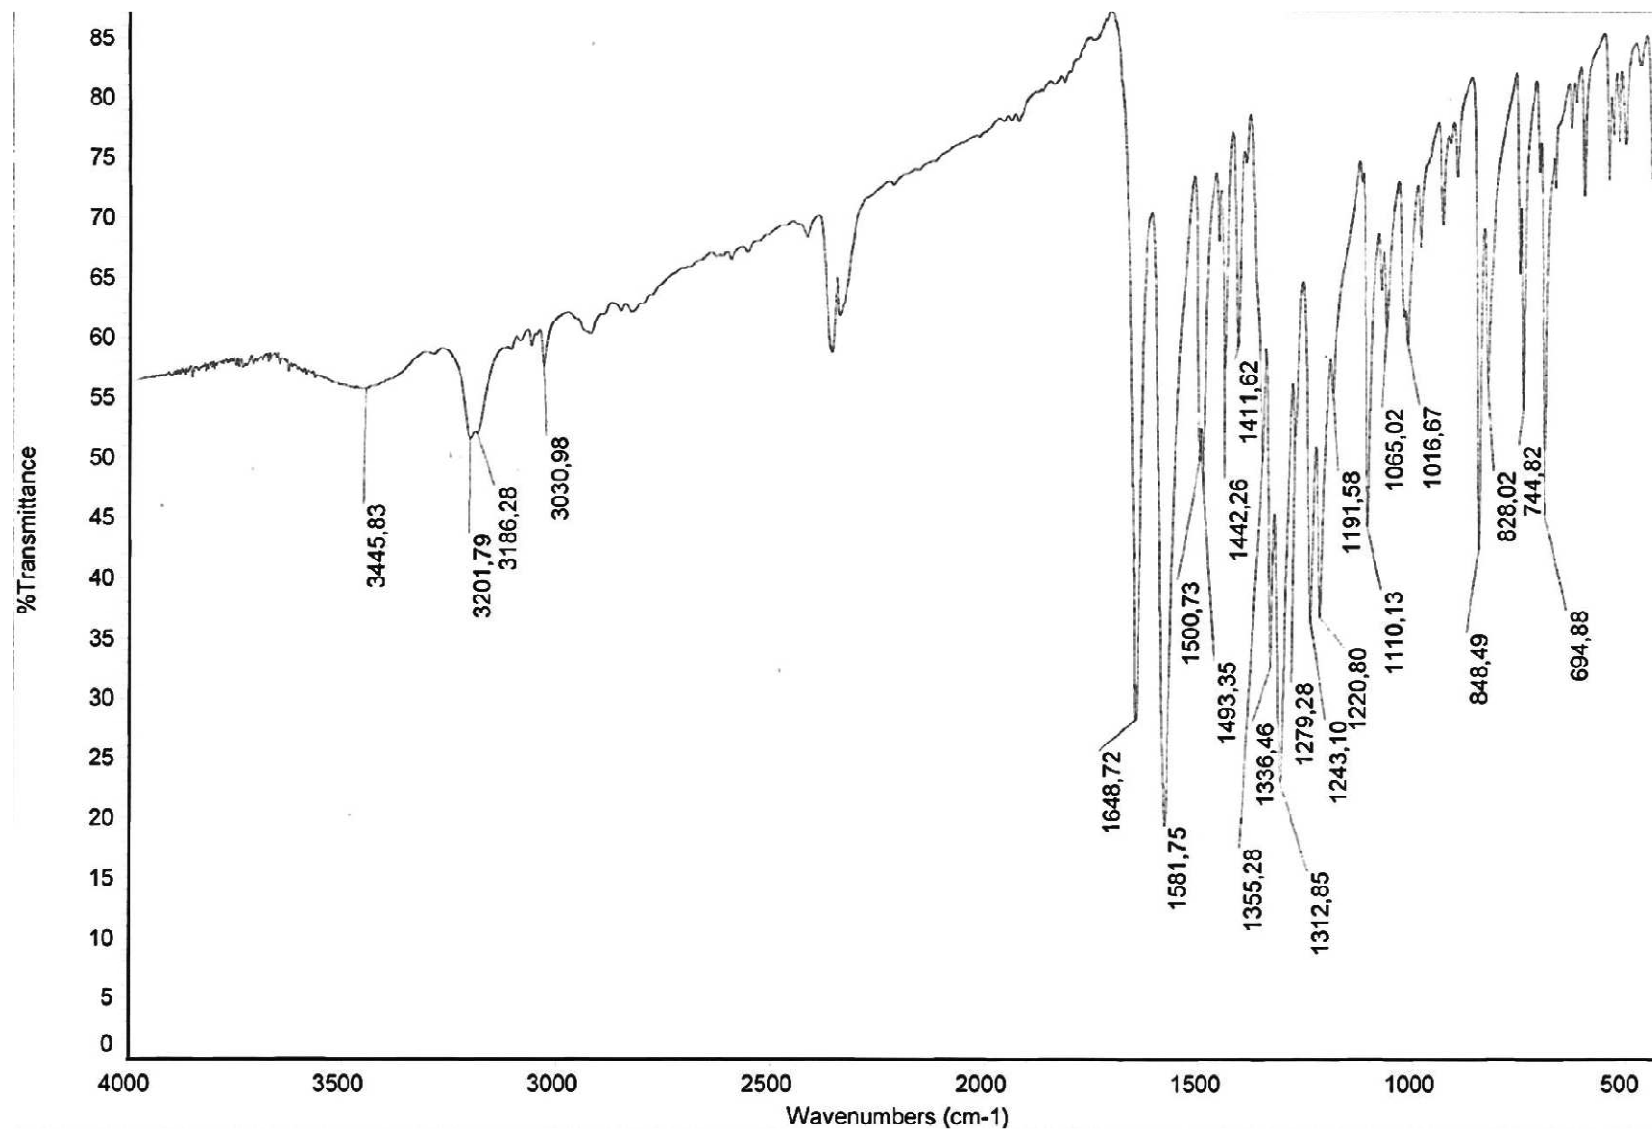

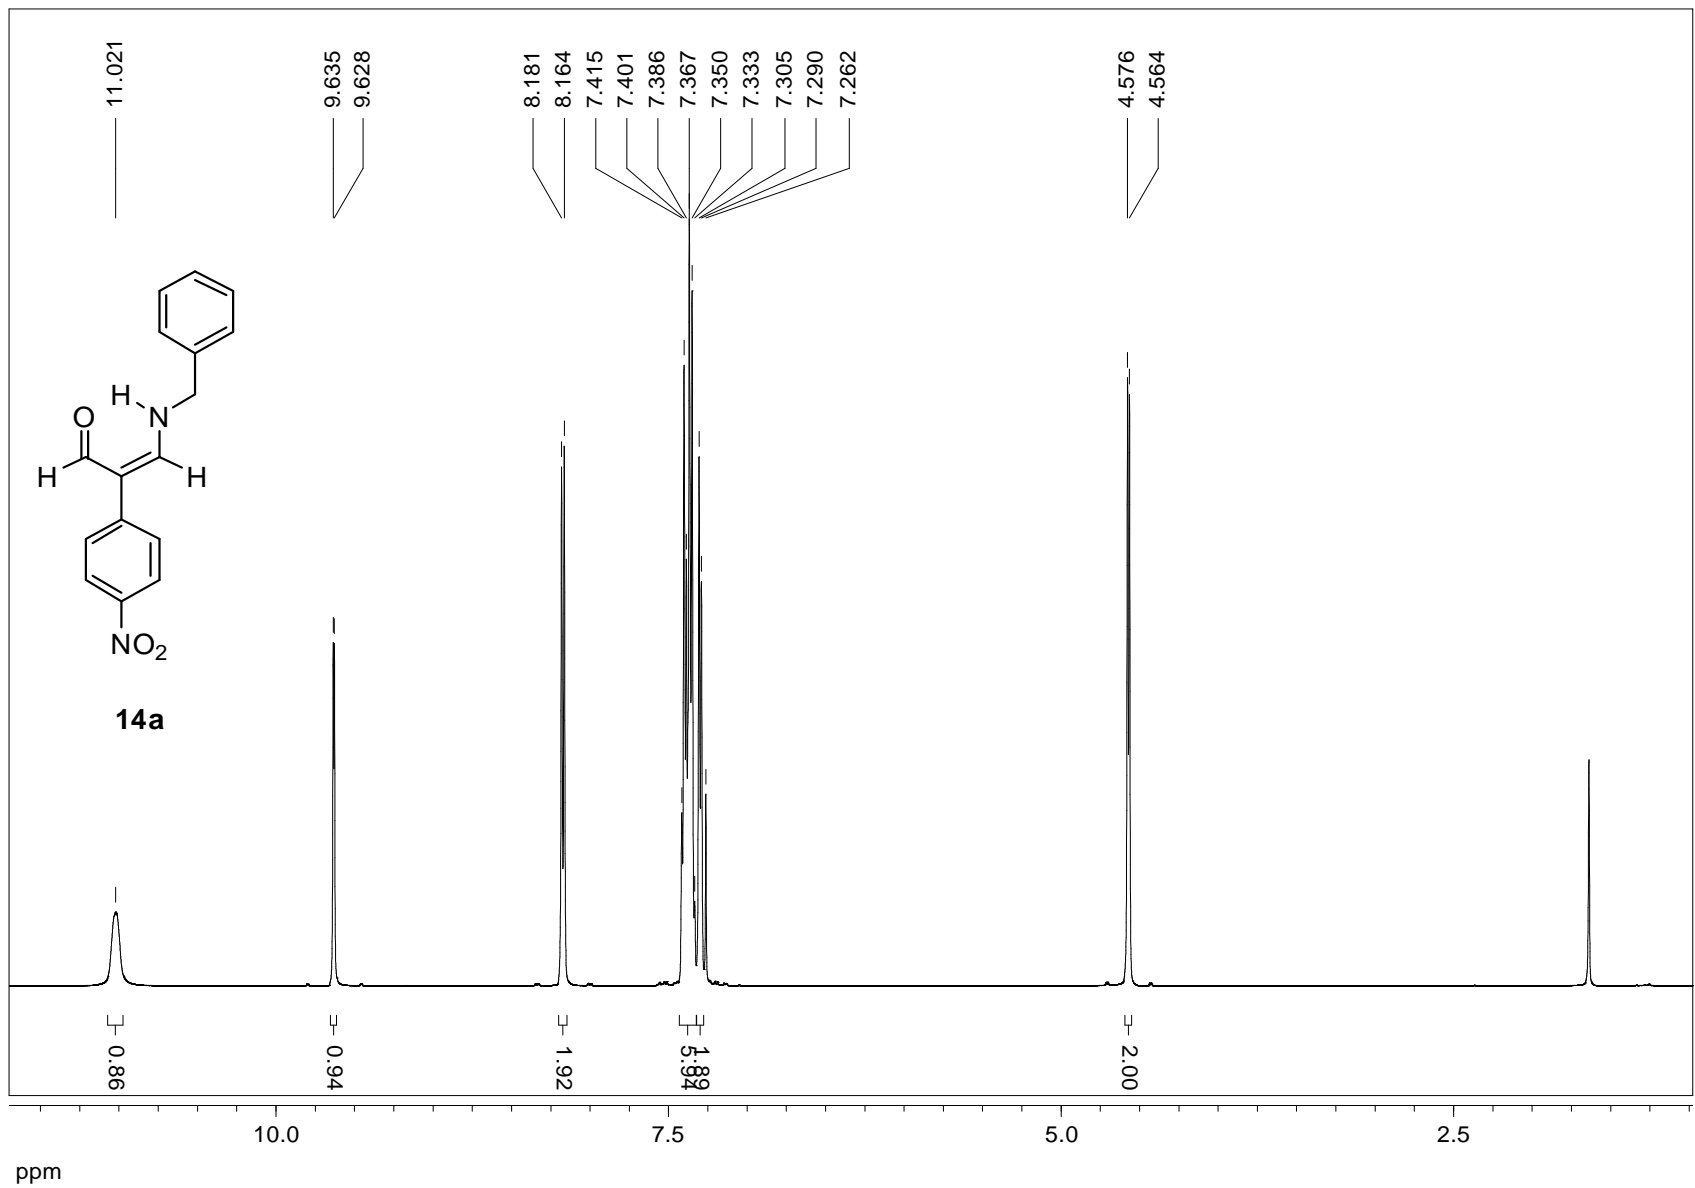



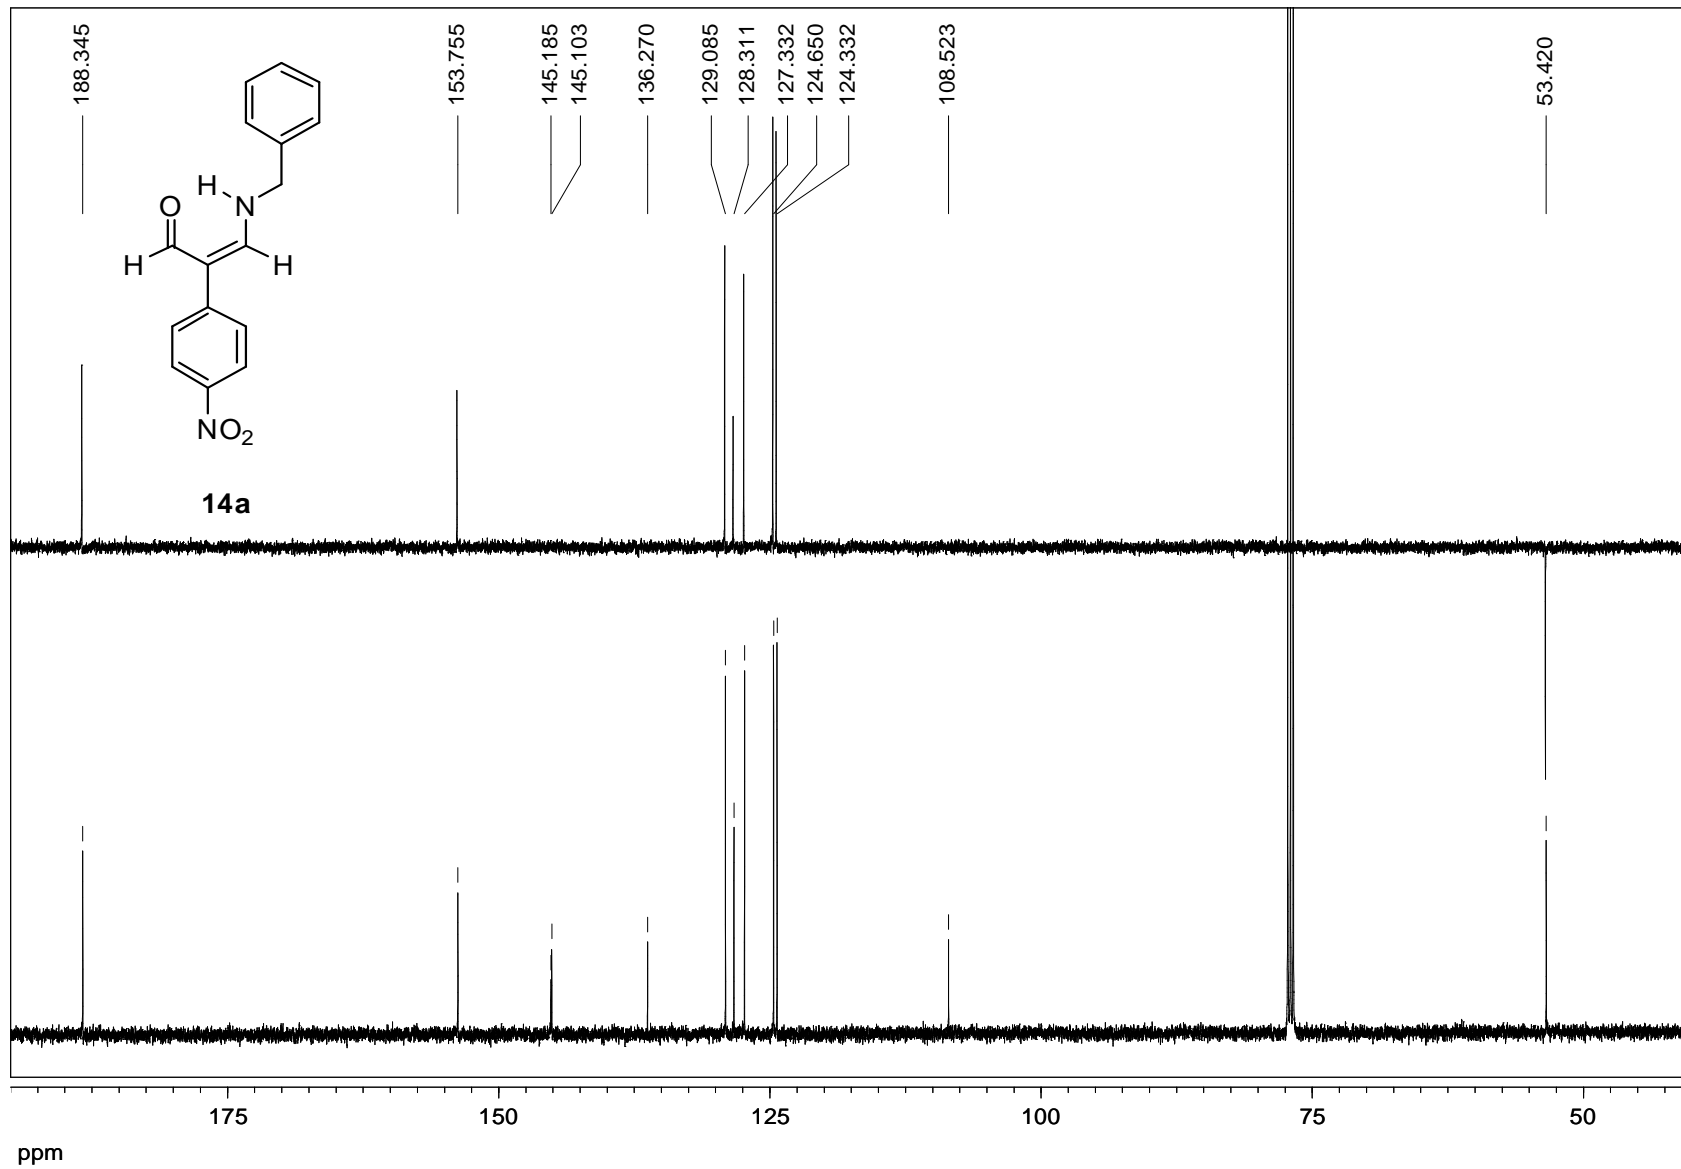

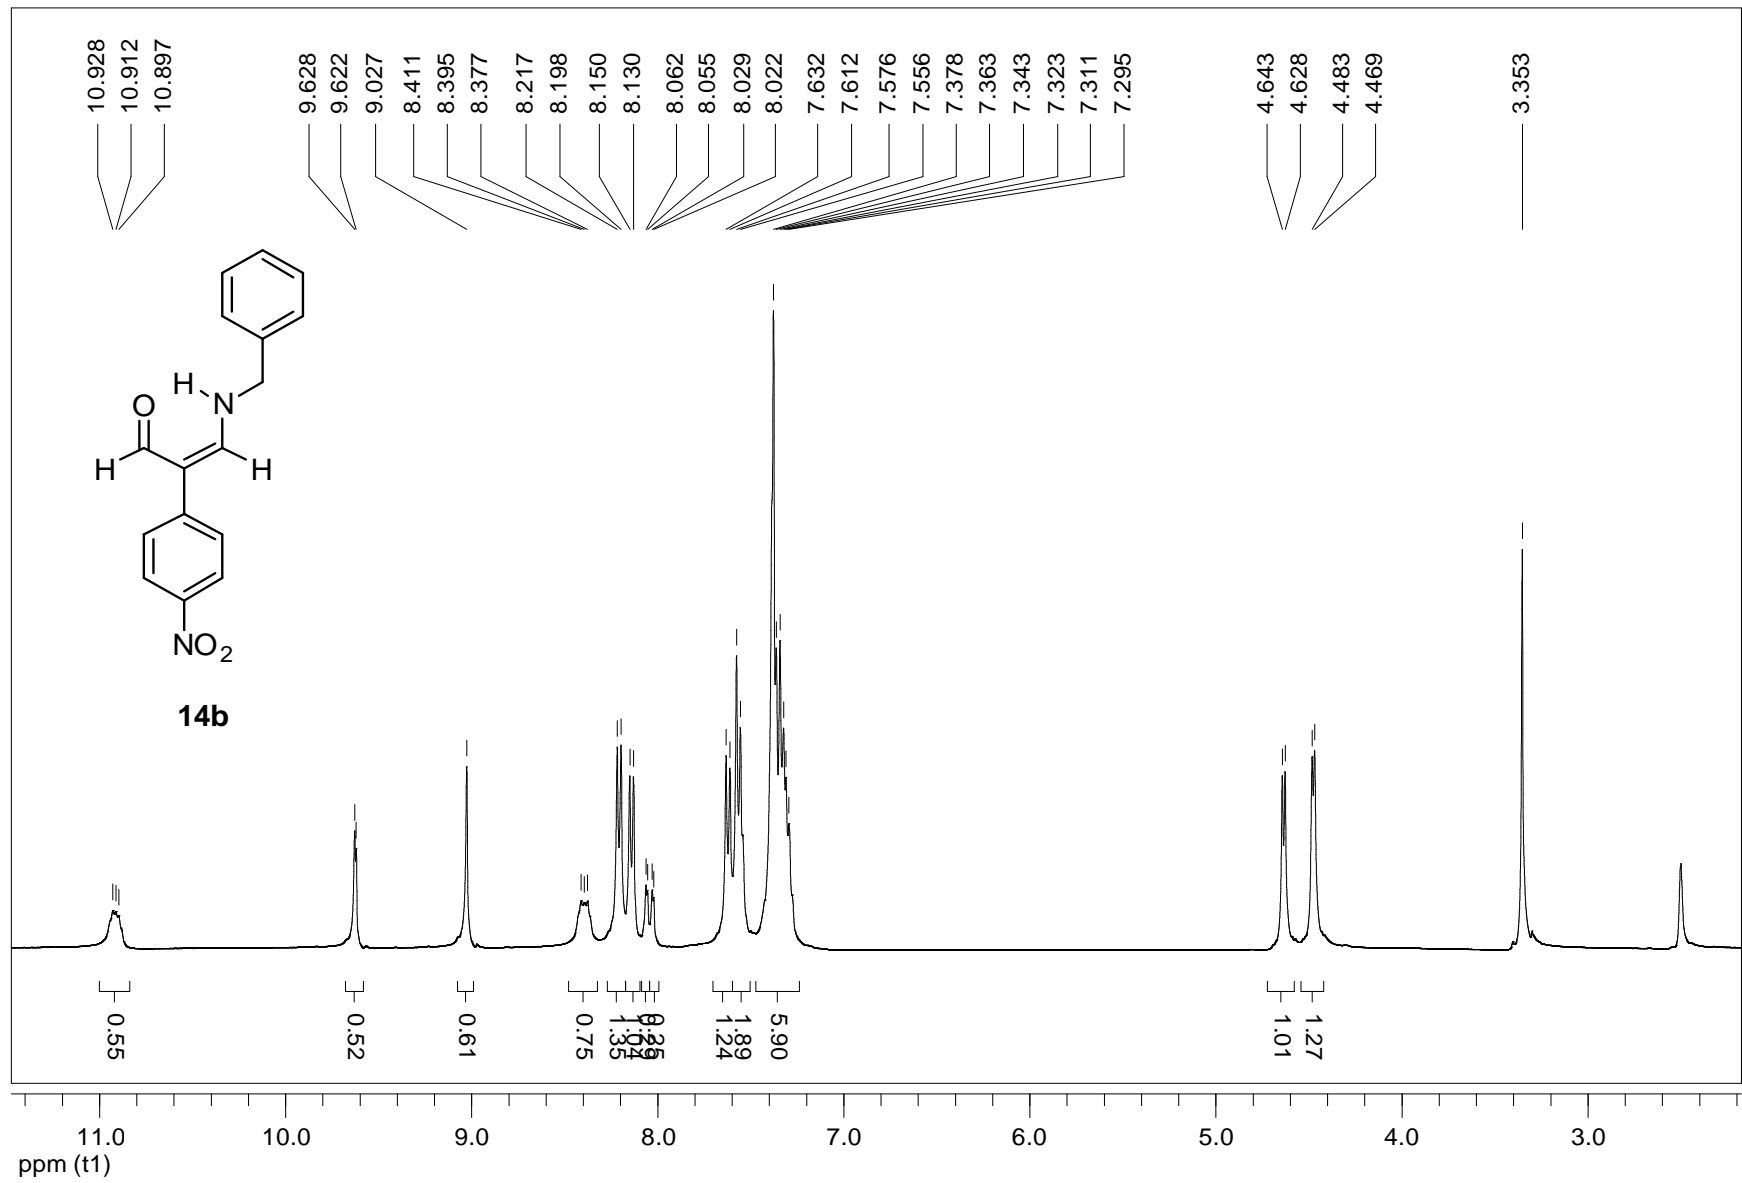

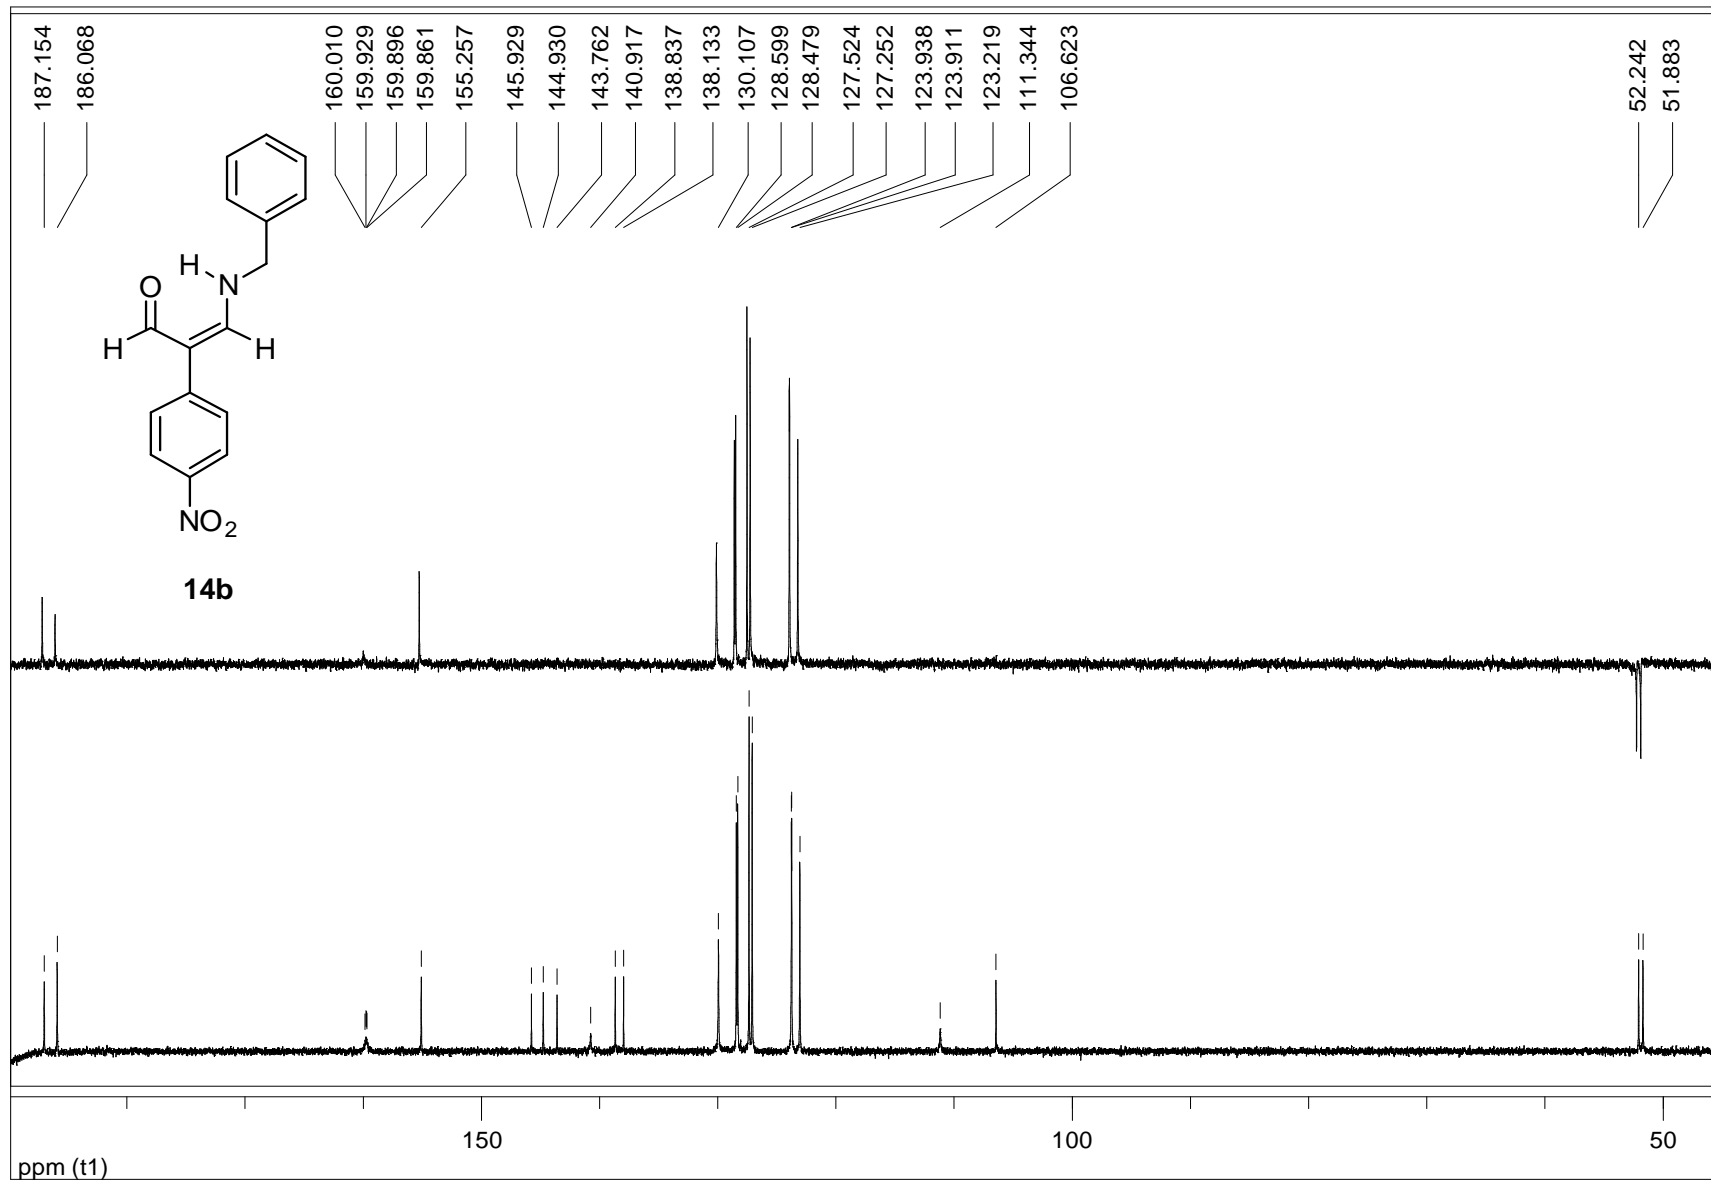

Compound 15:

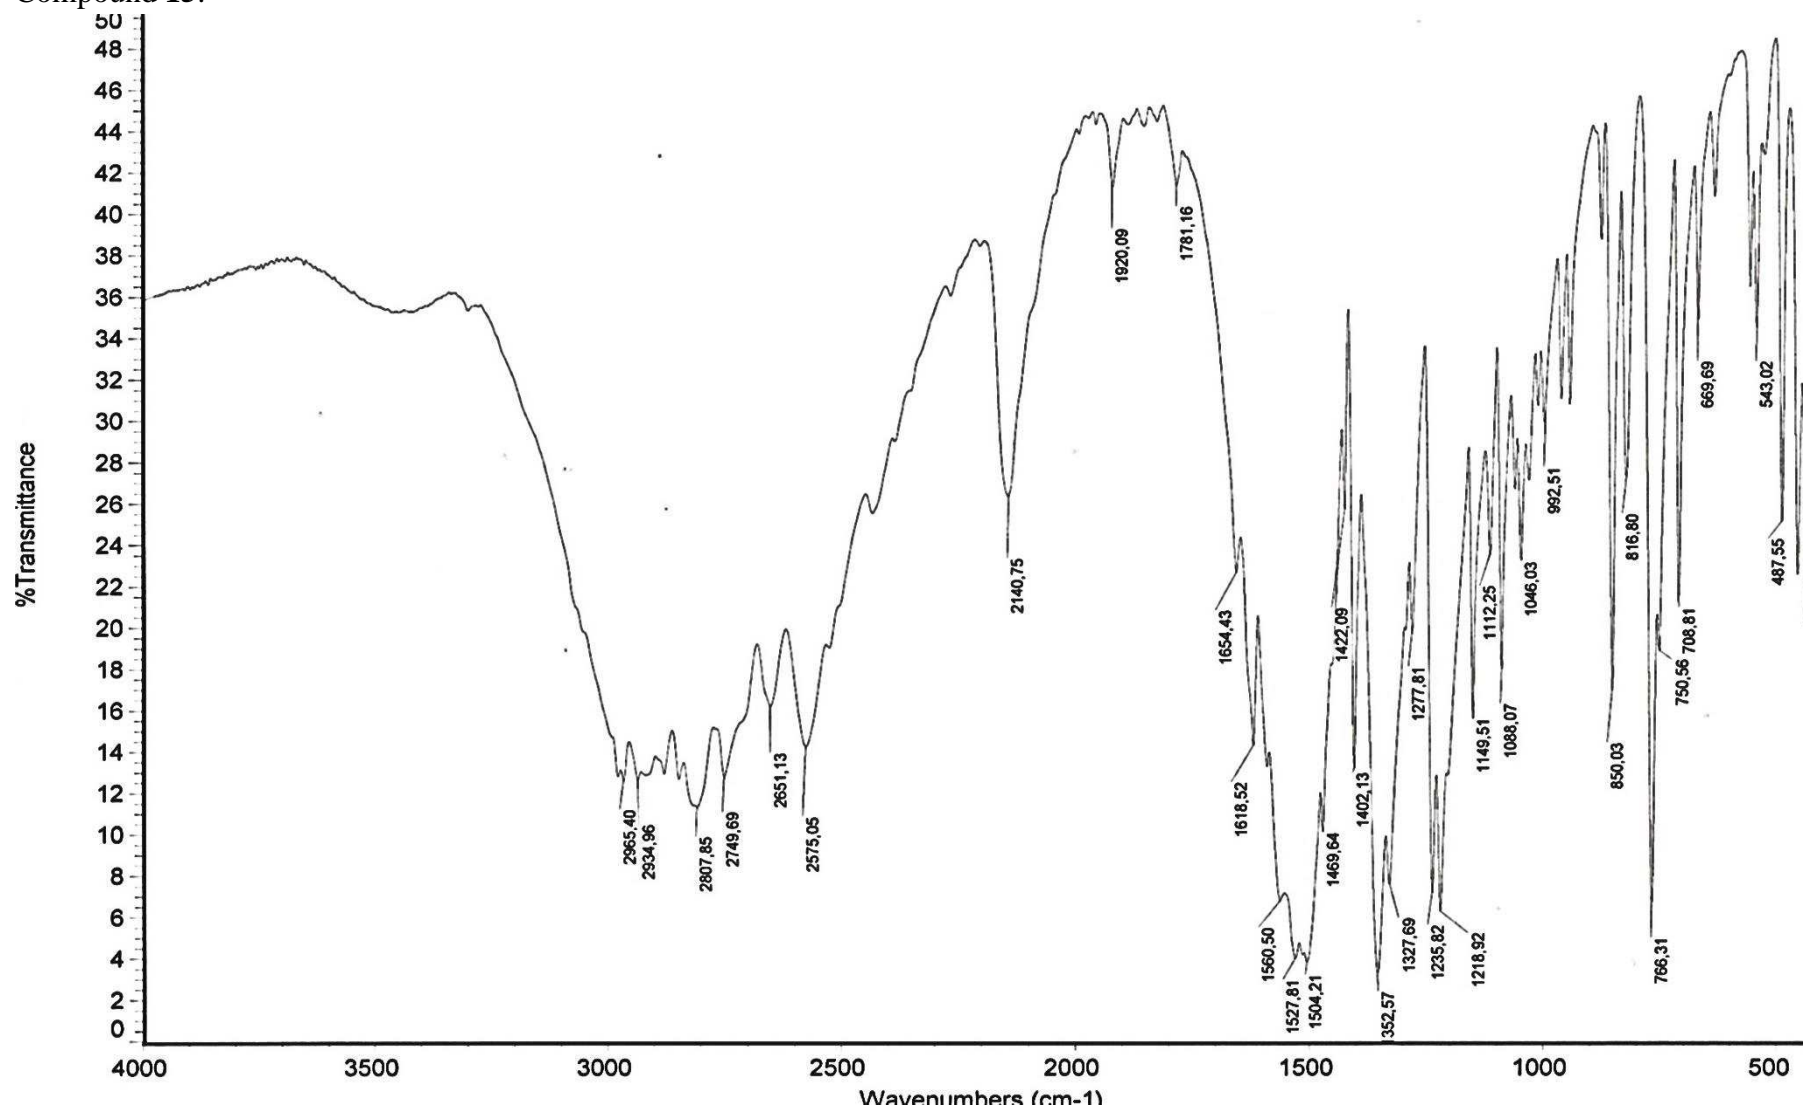

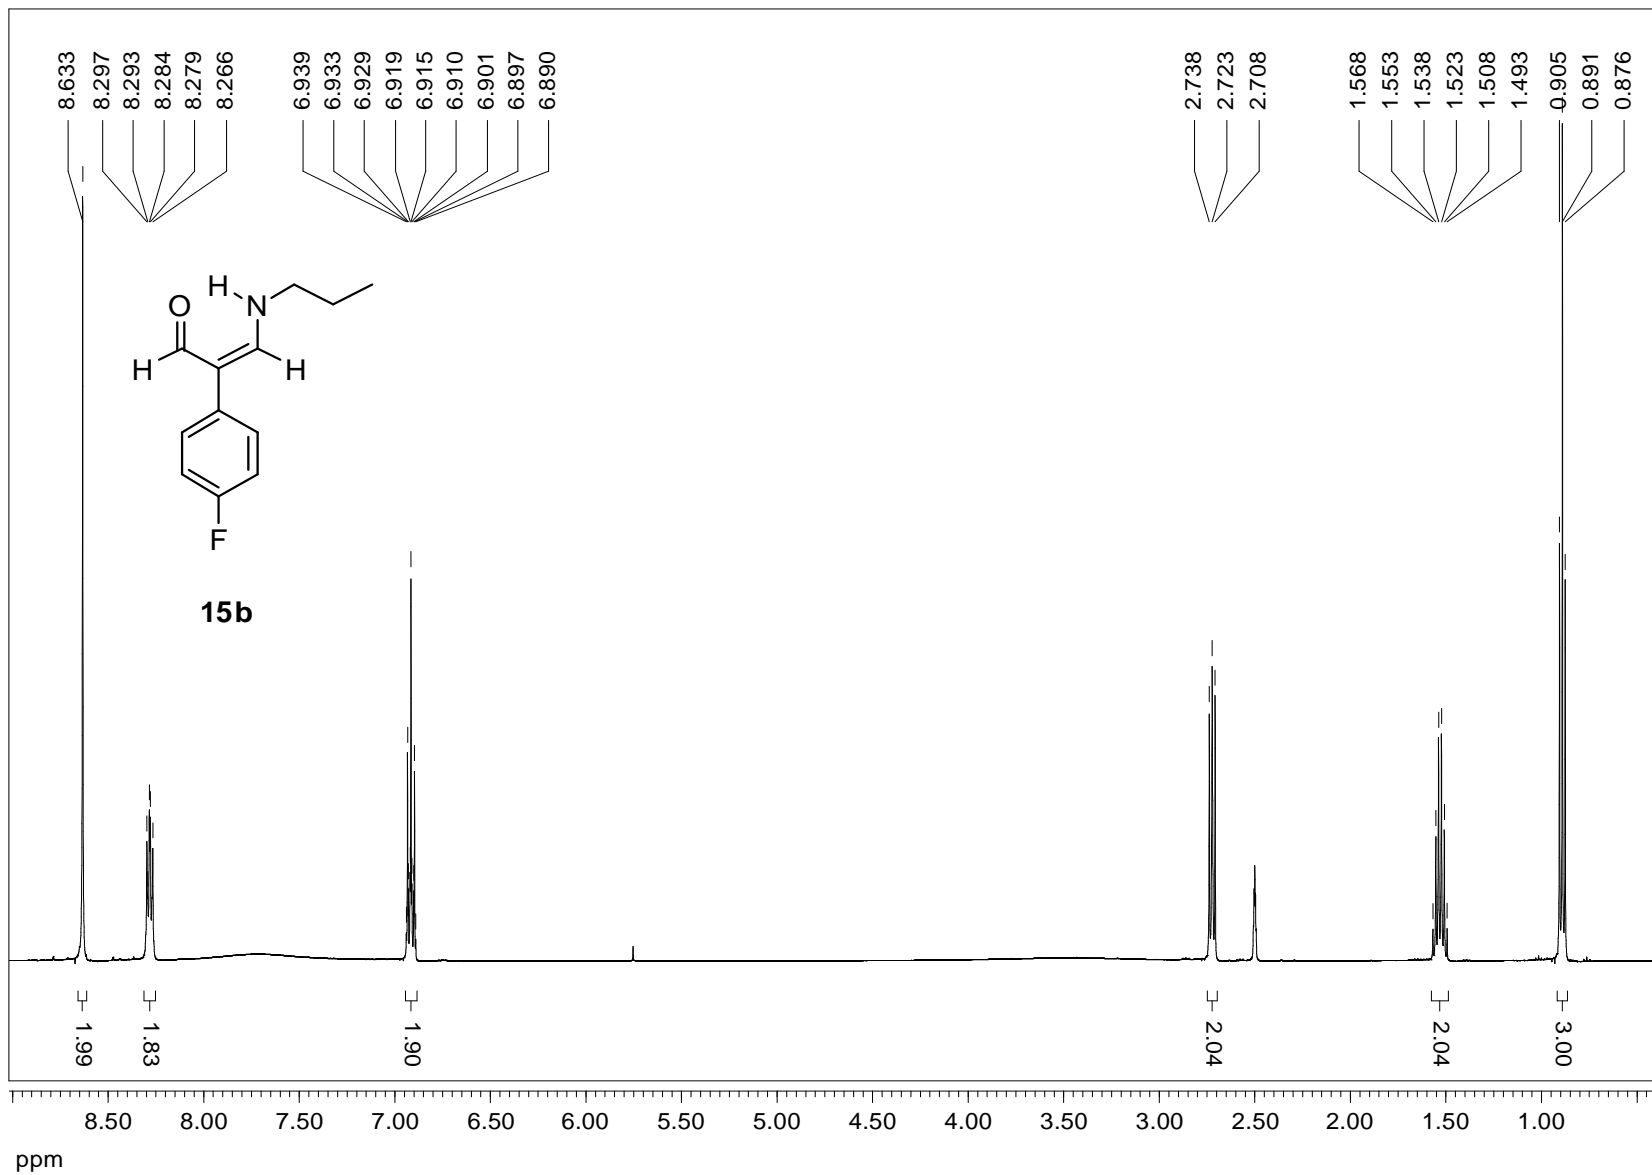

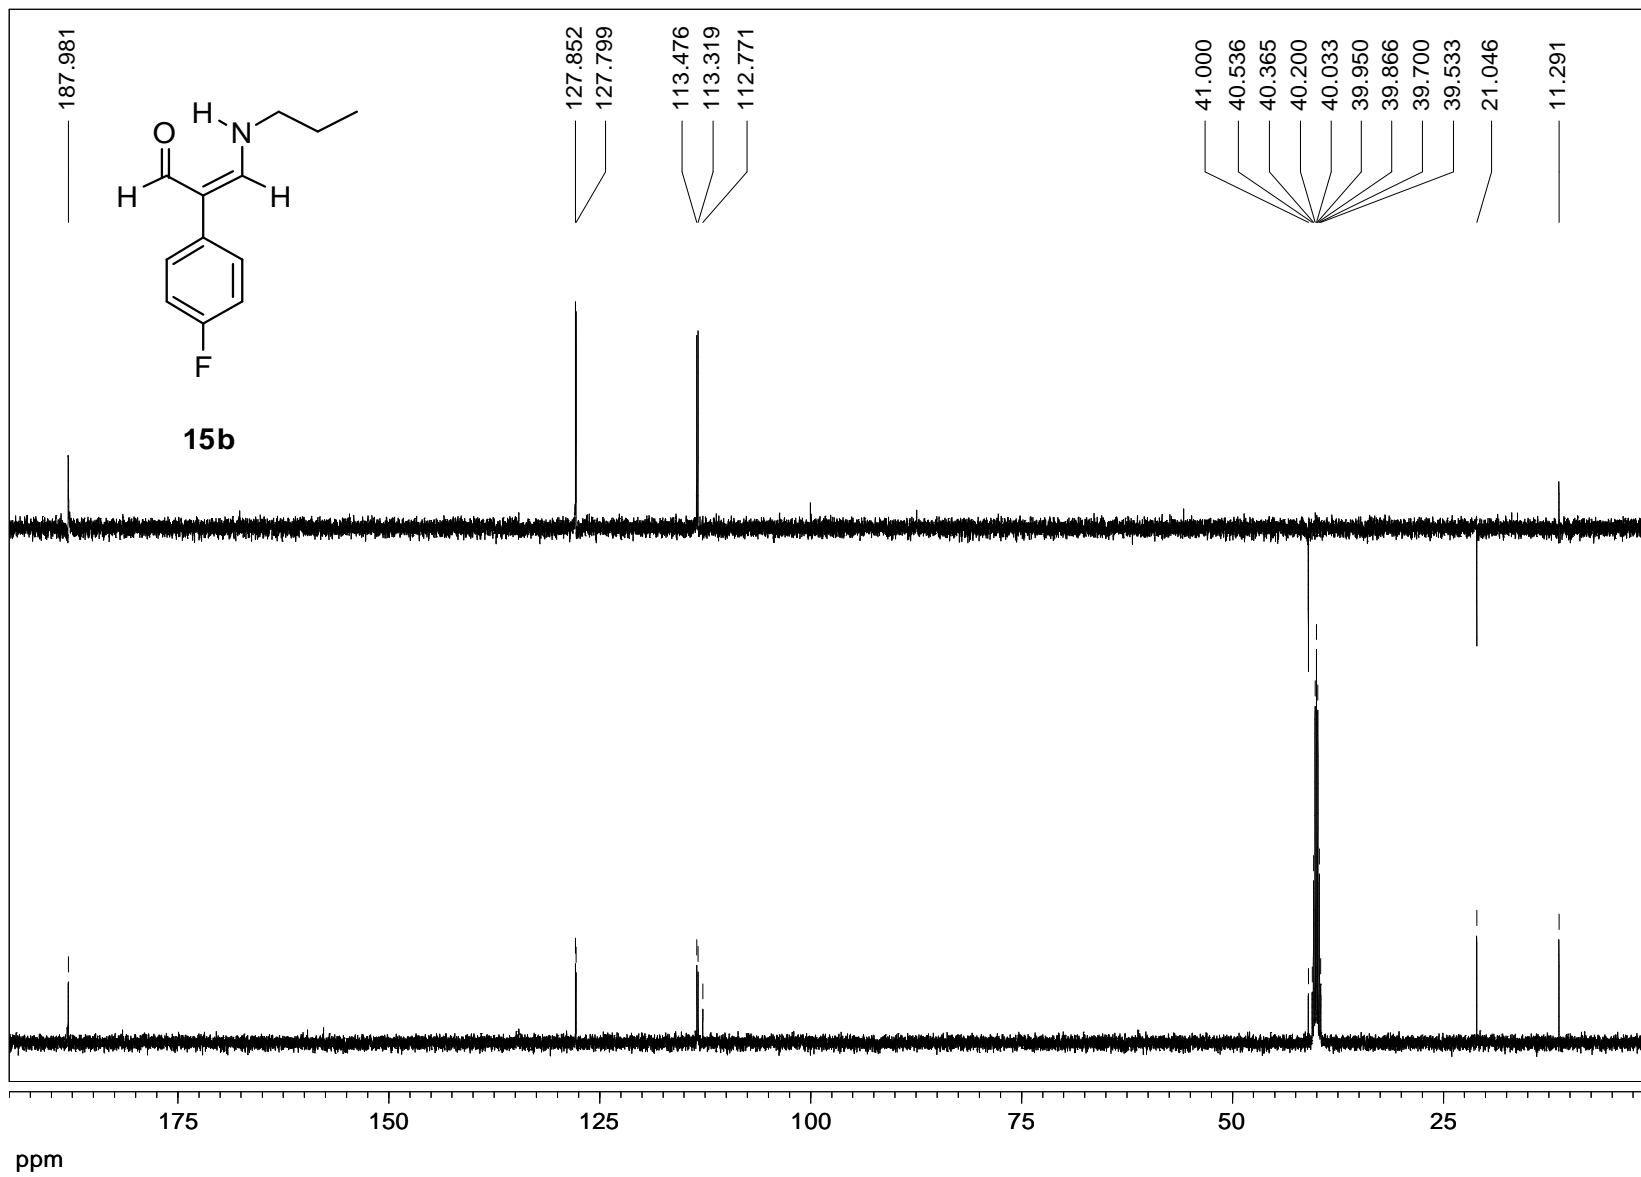

Compound 16:

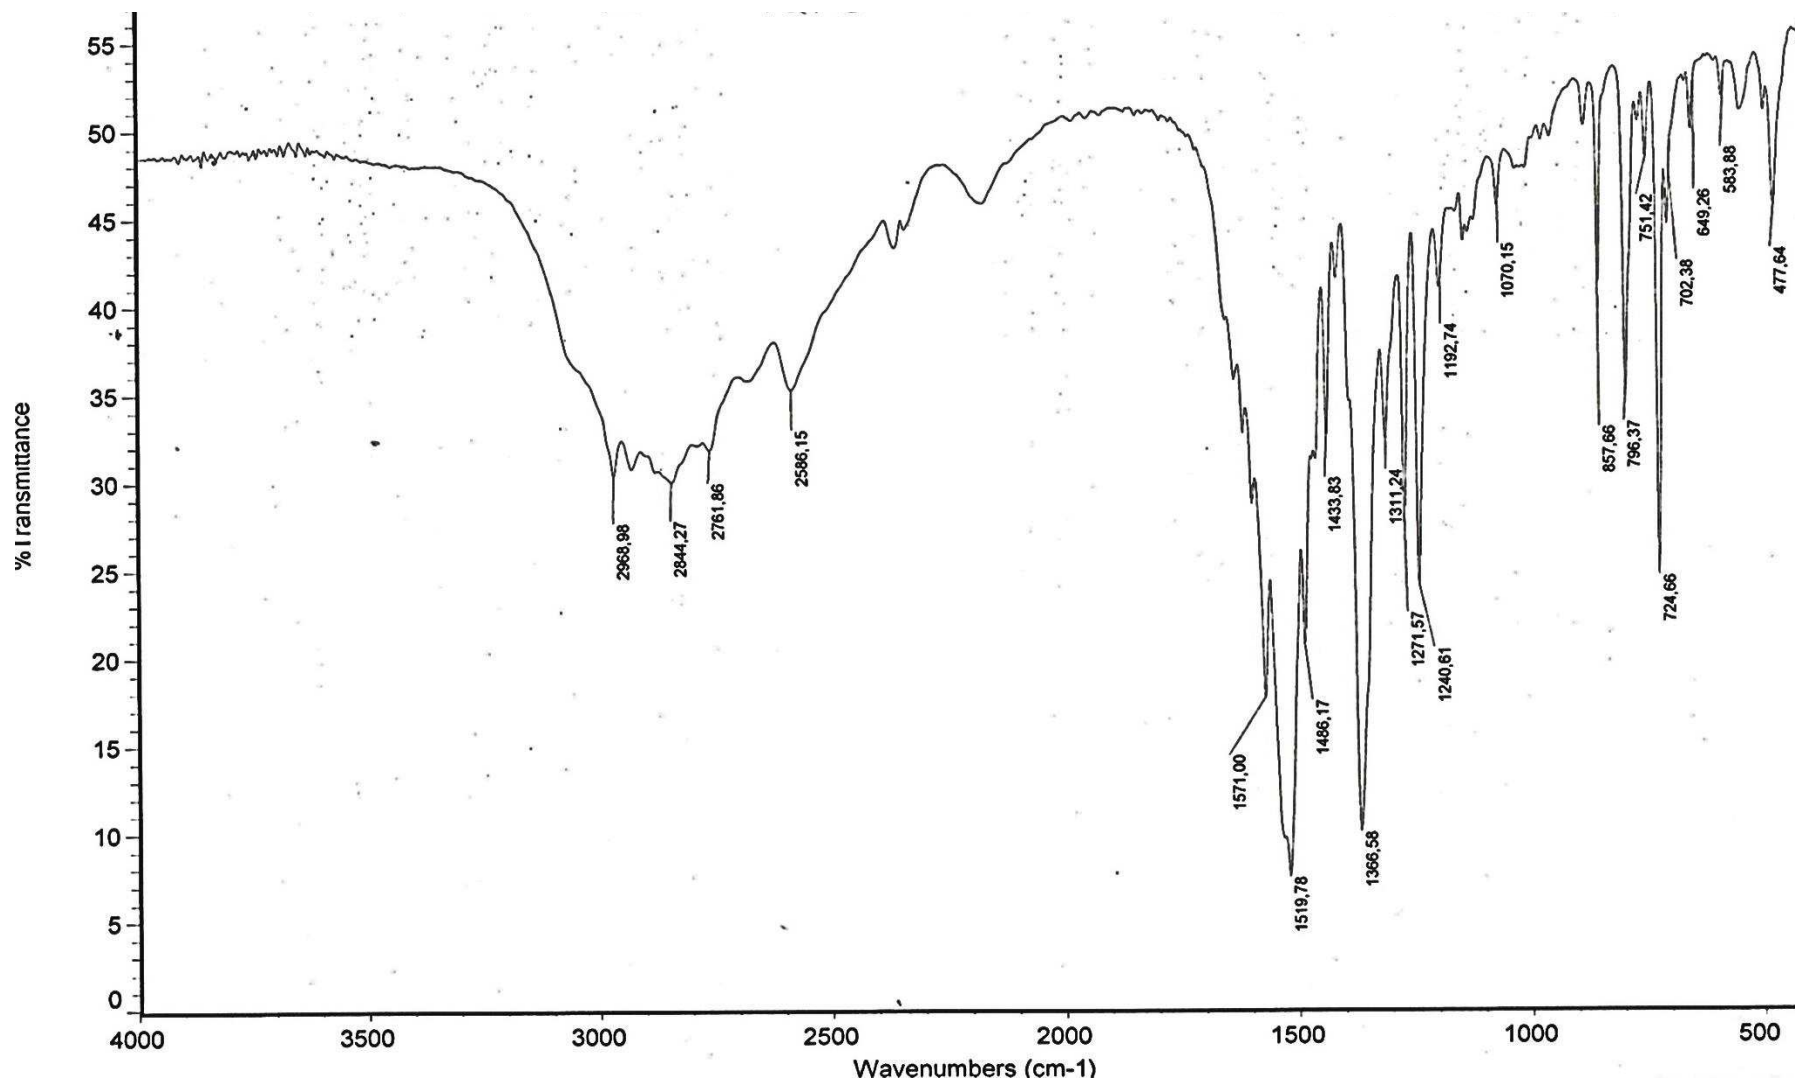

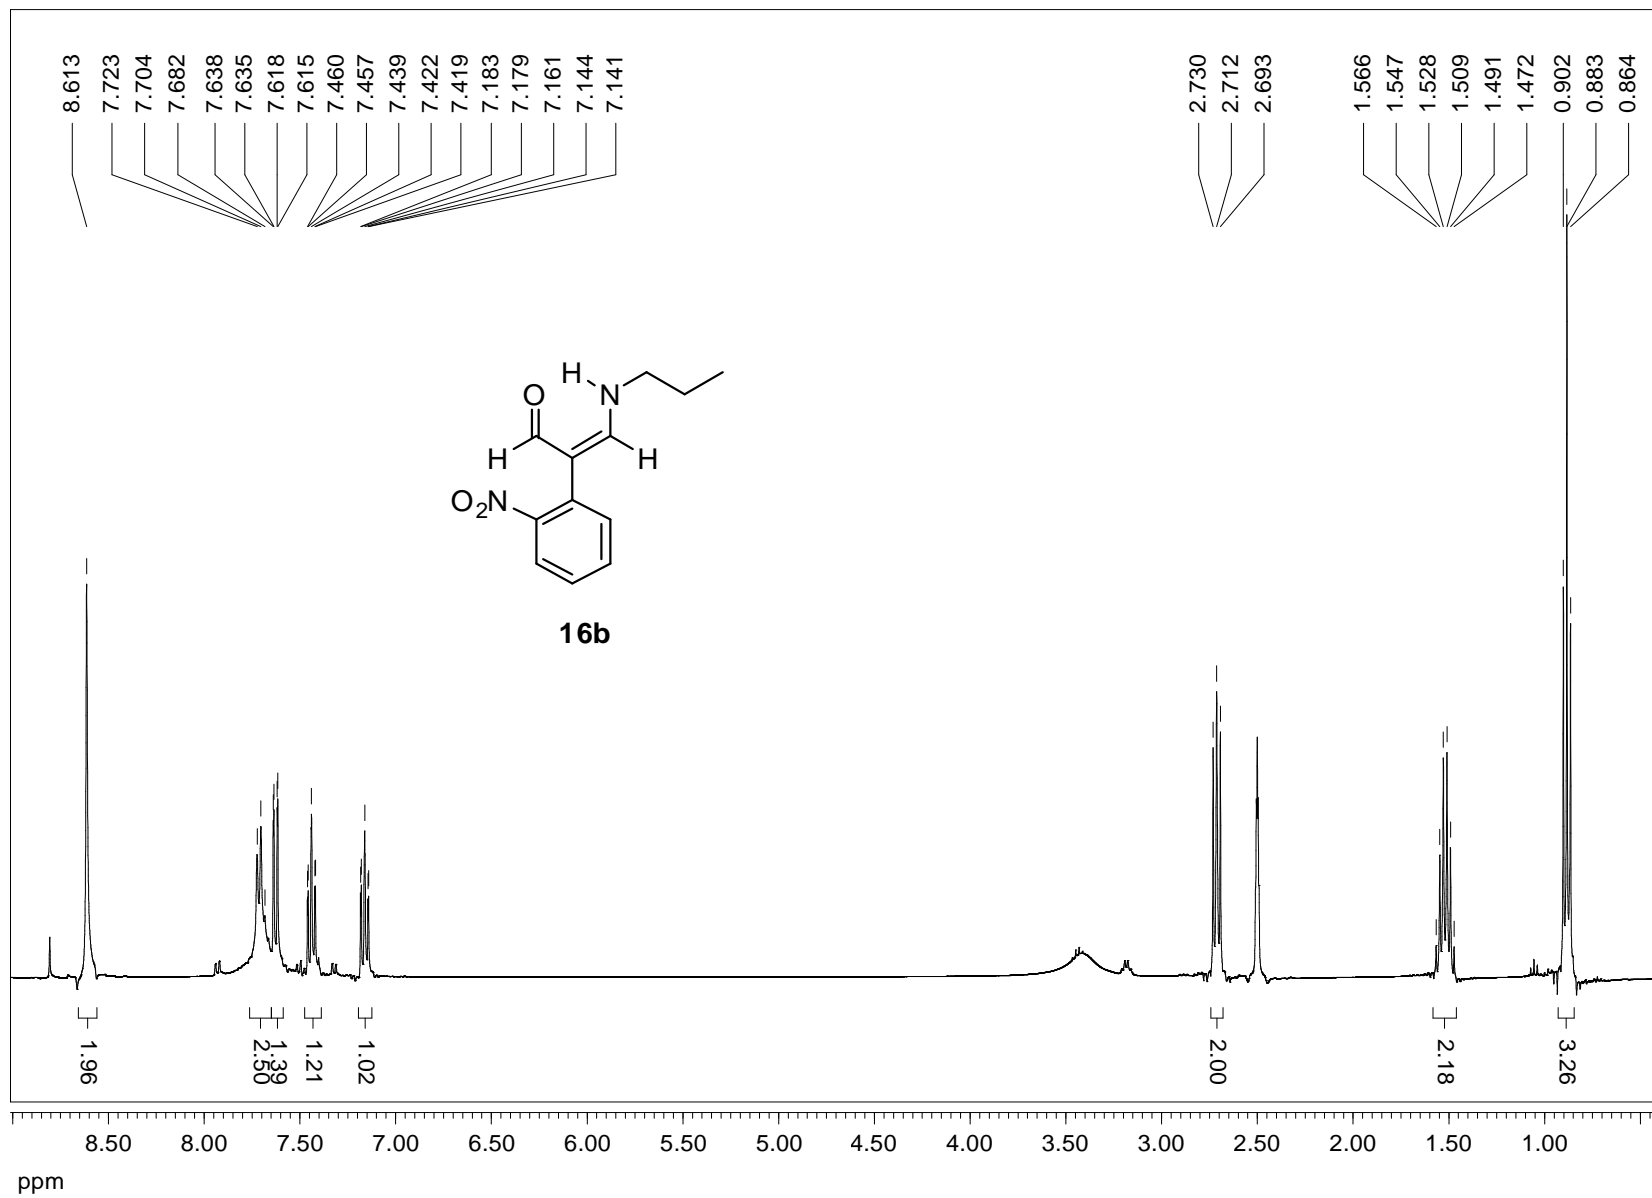



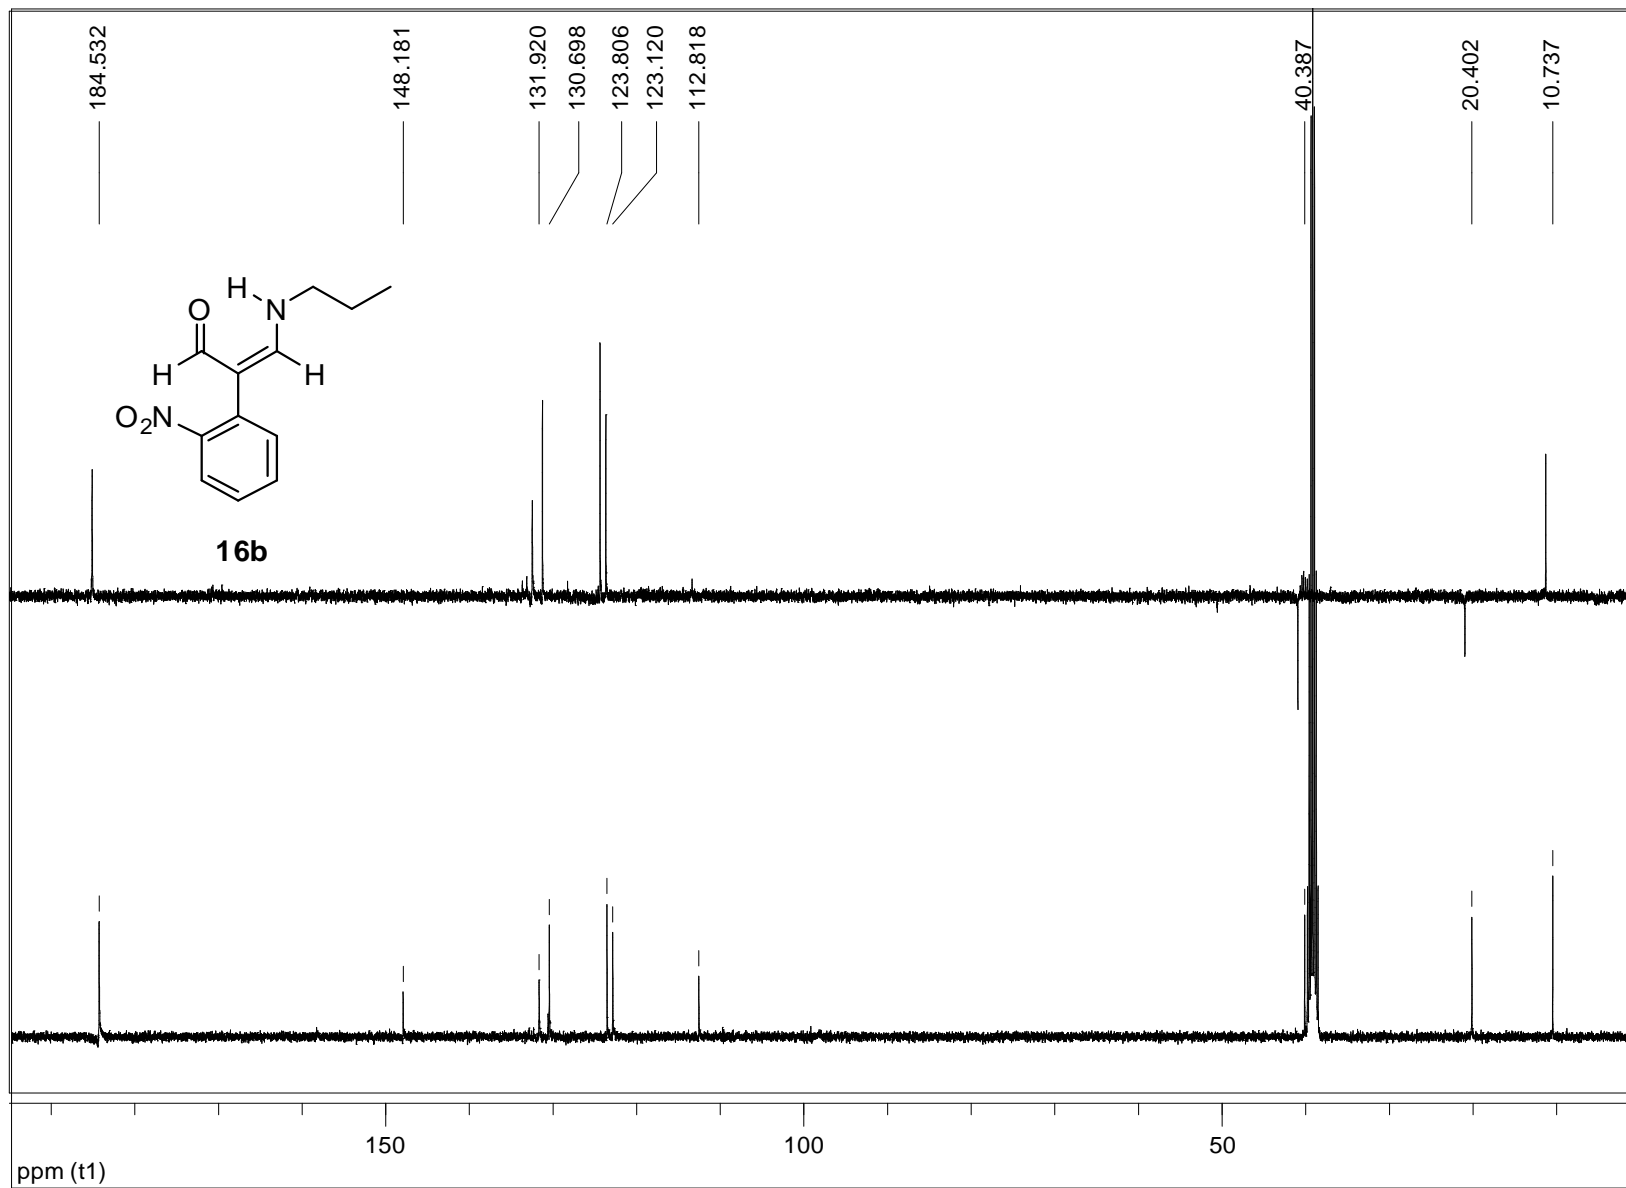

Compound 17:

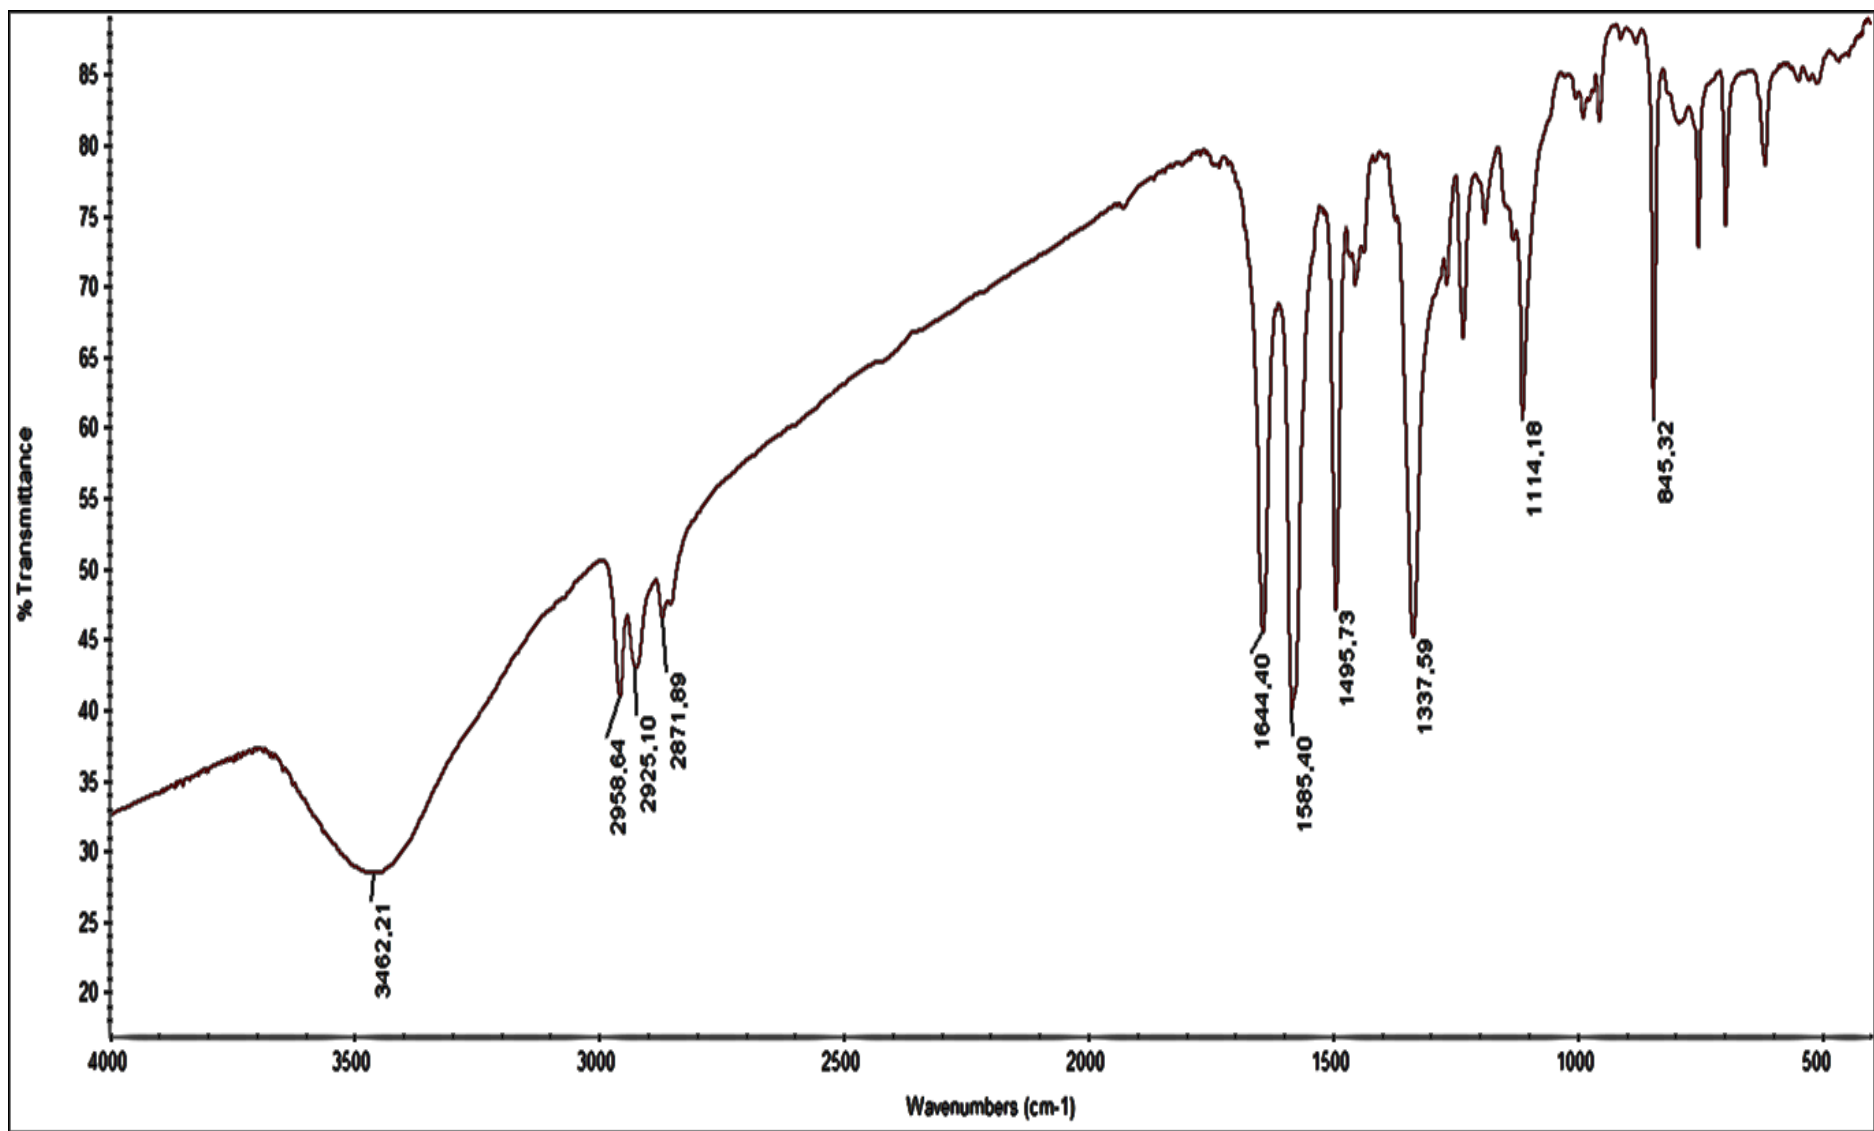

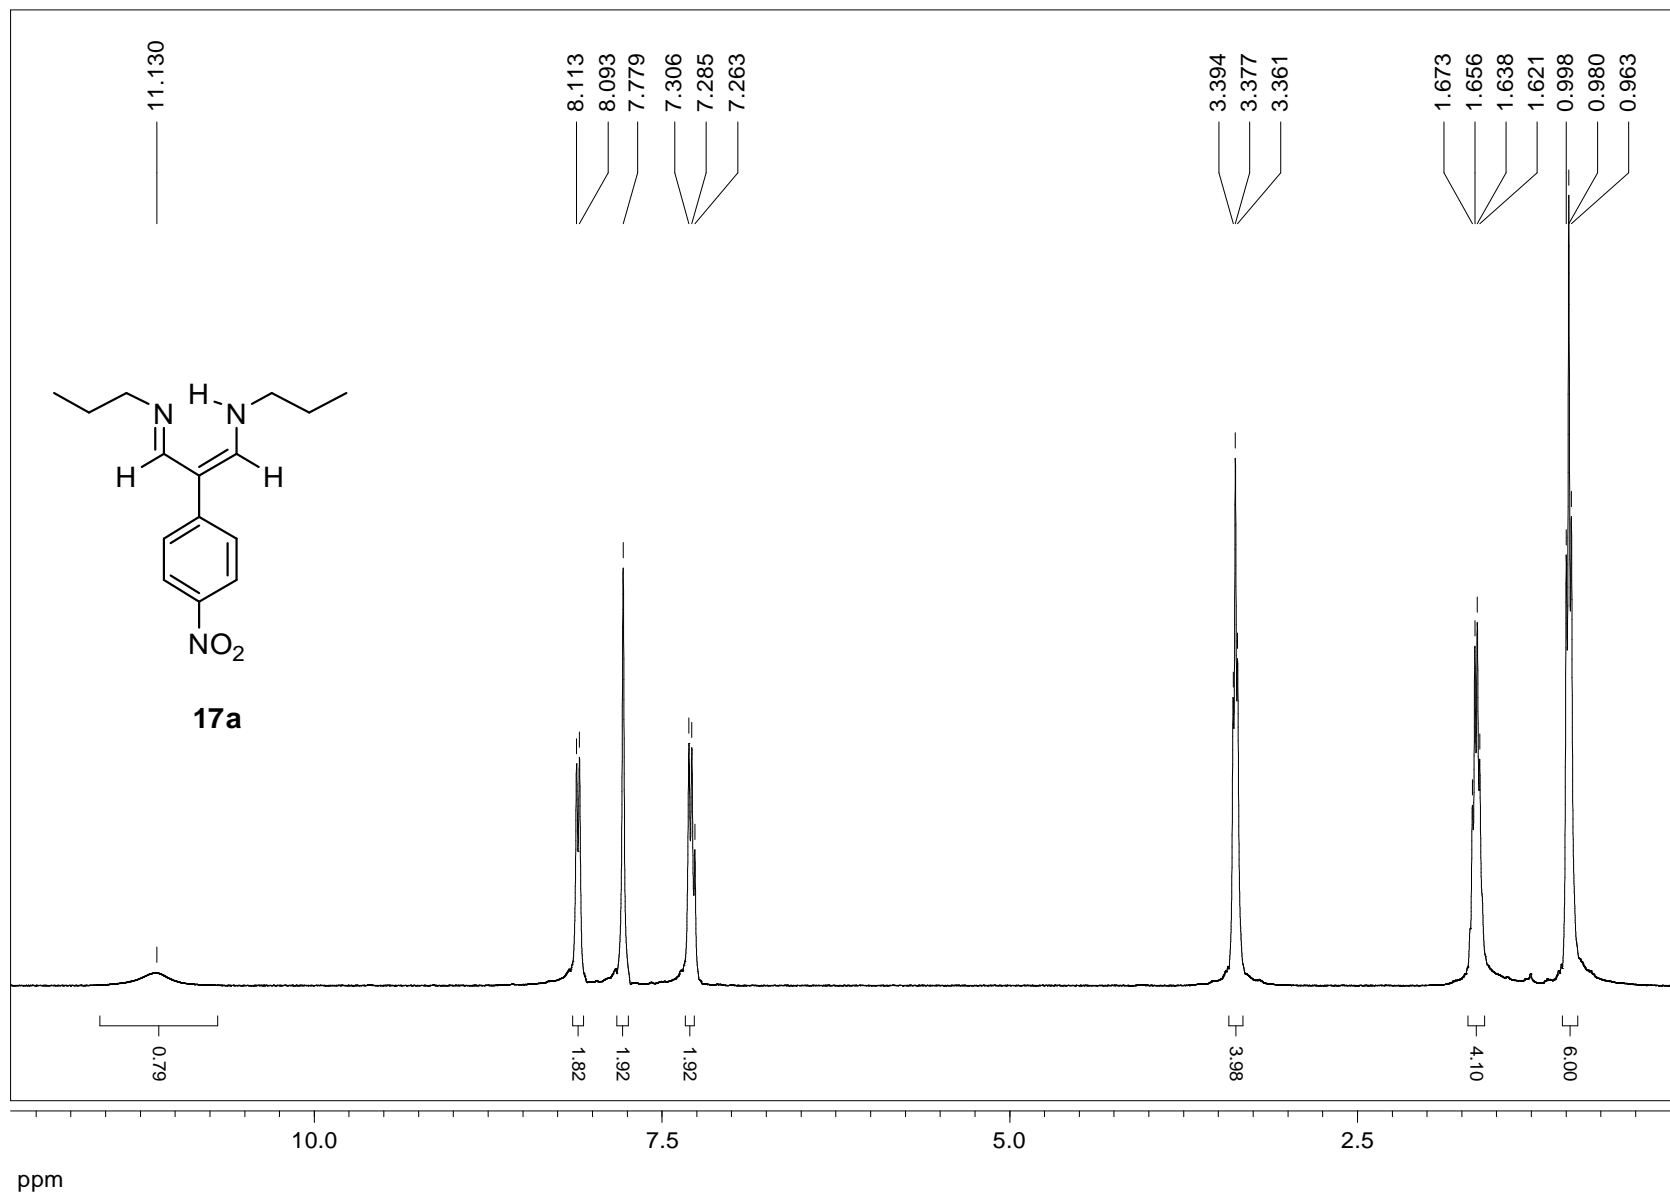

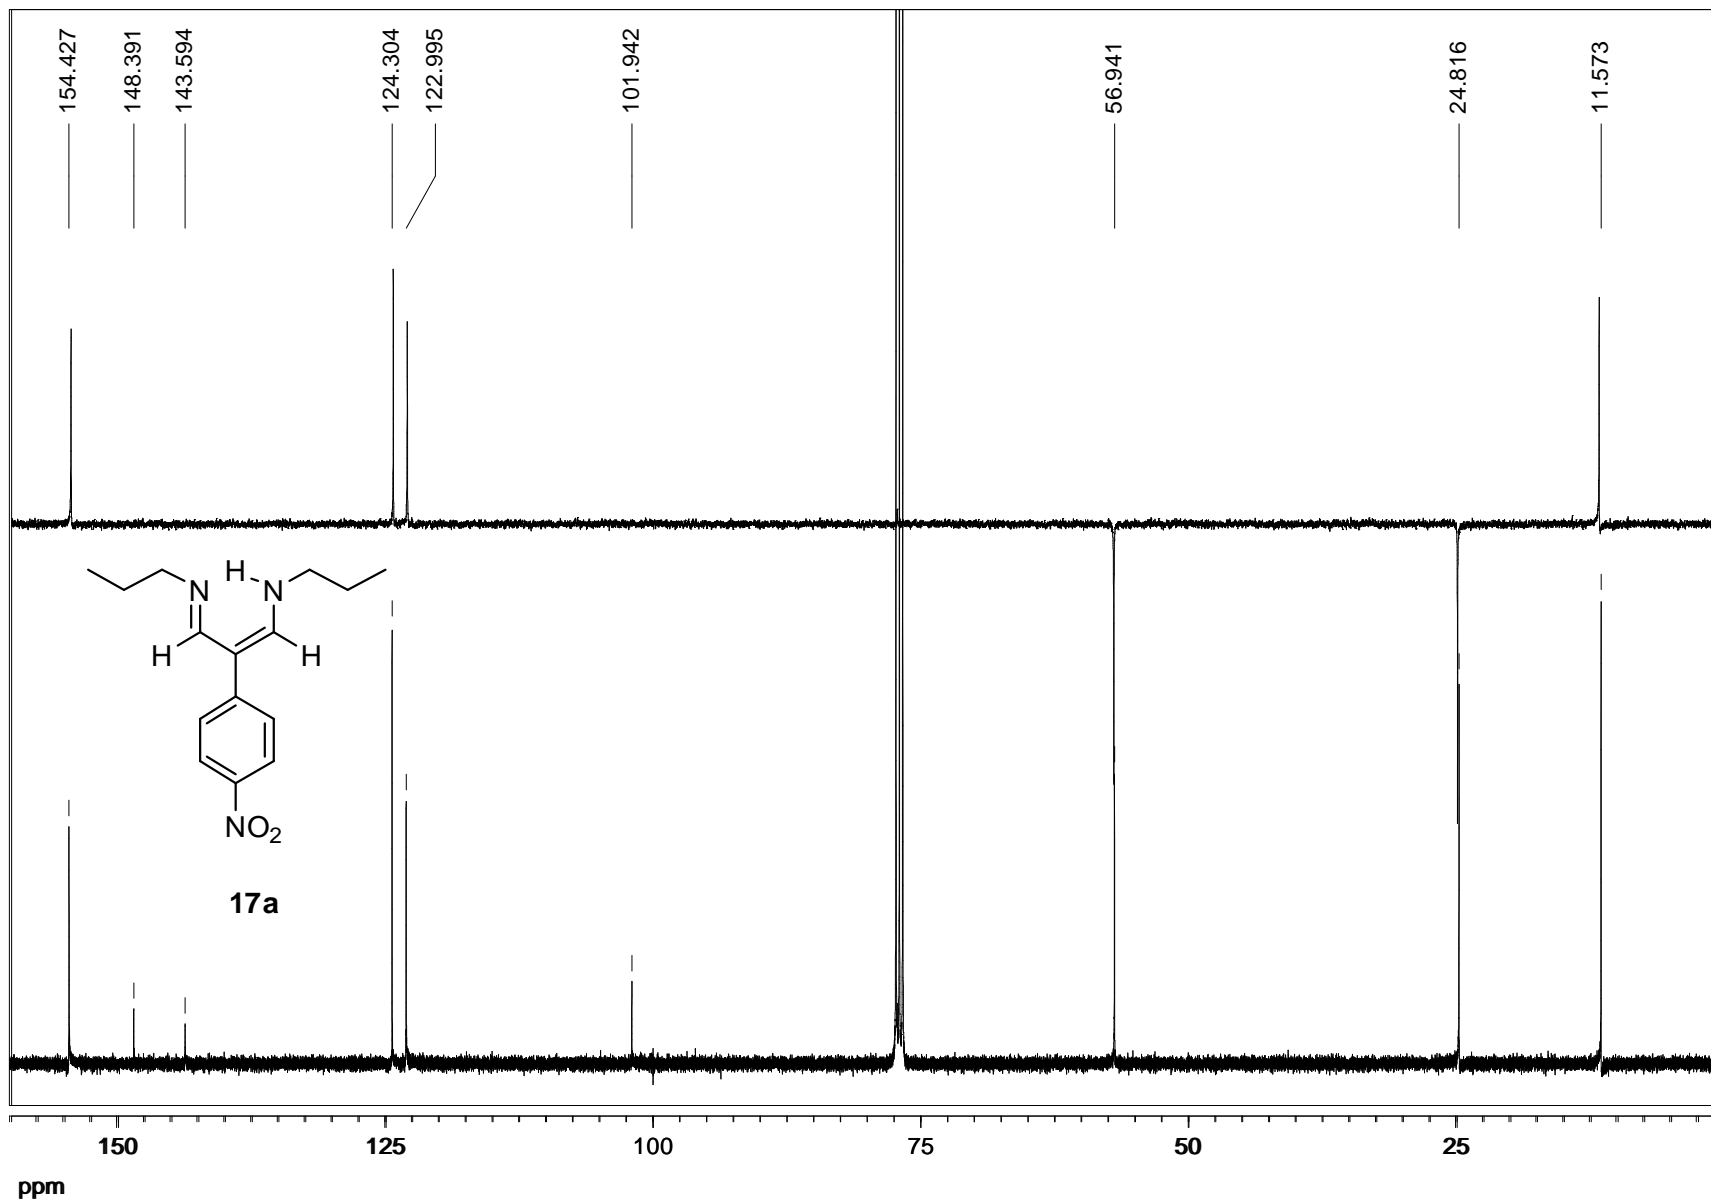

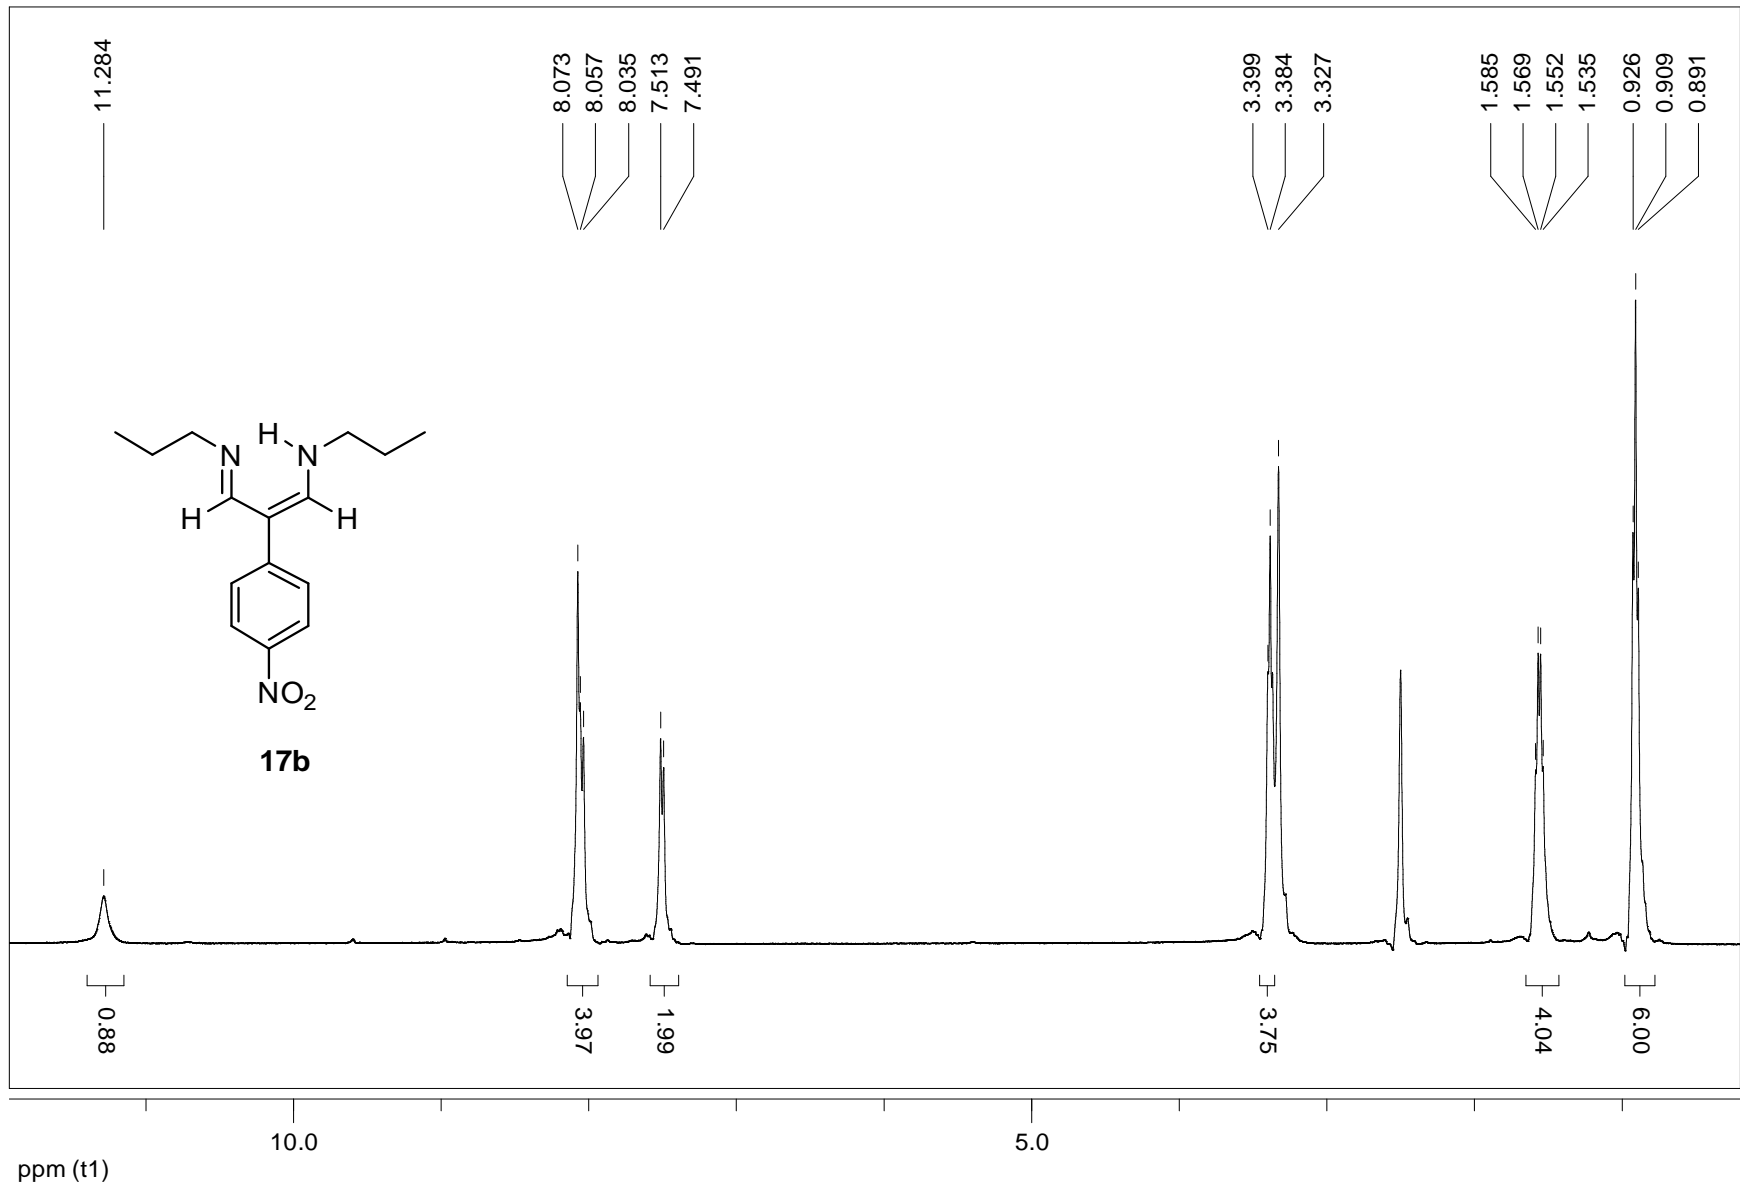

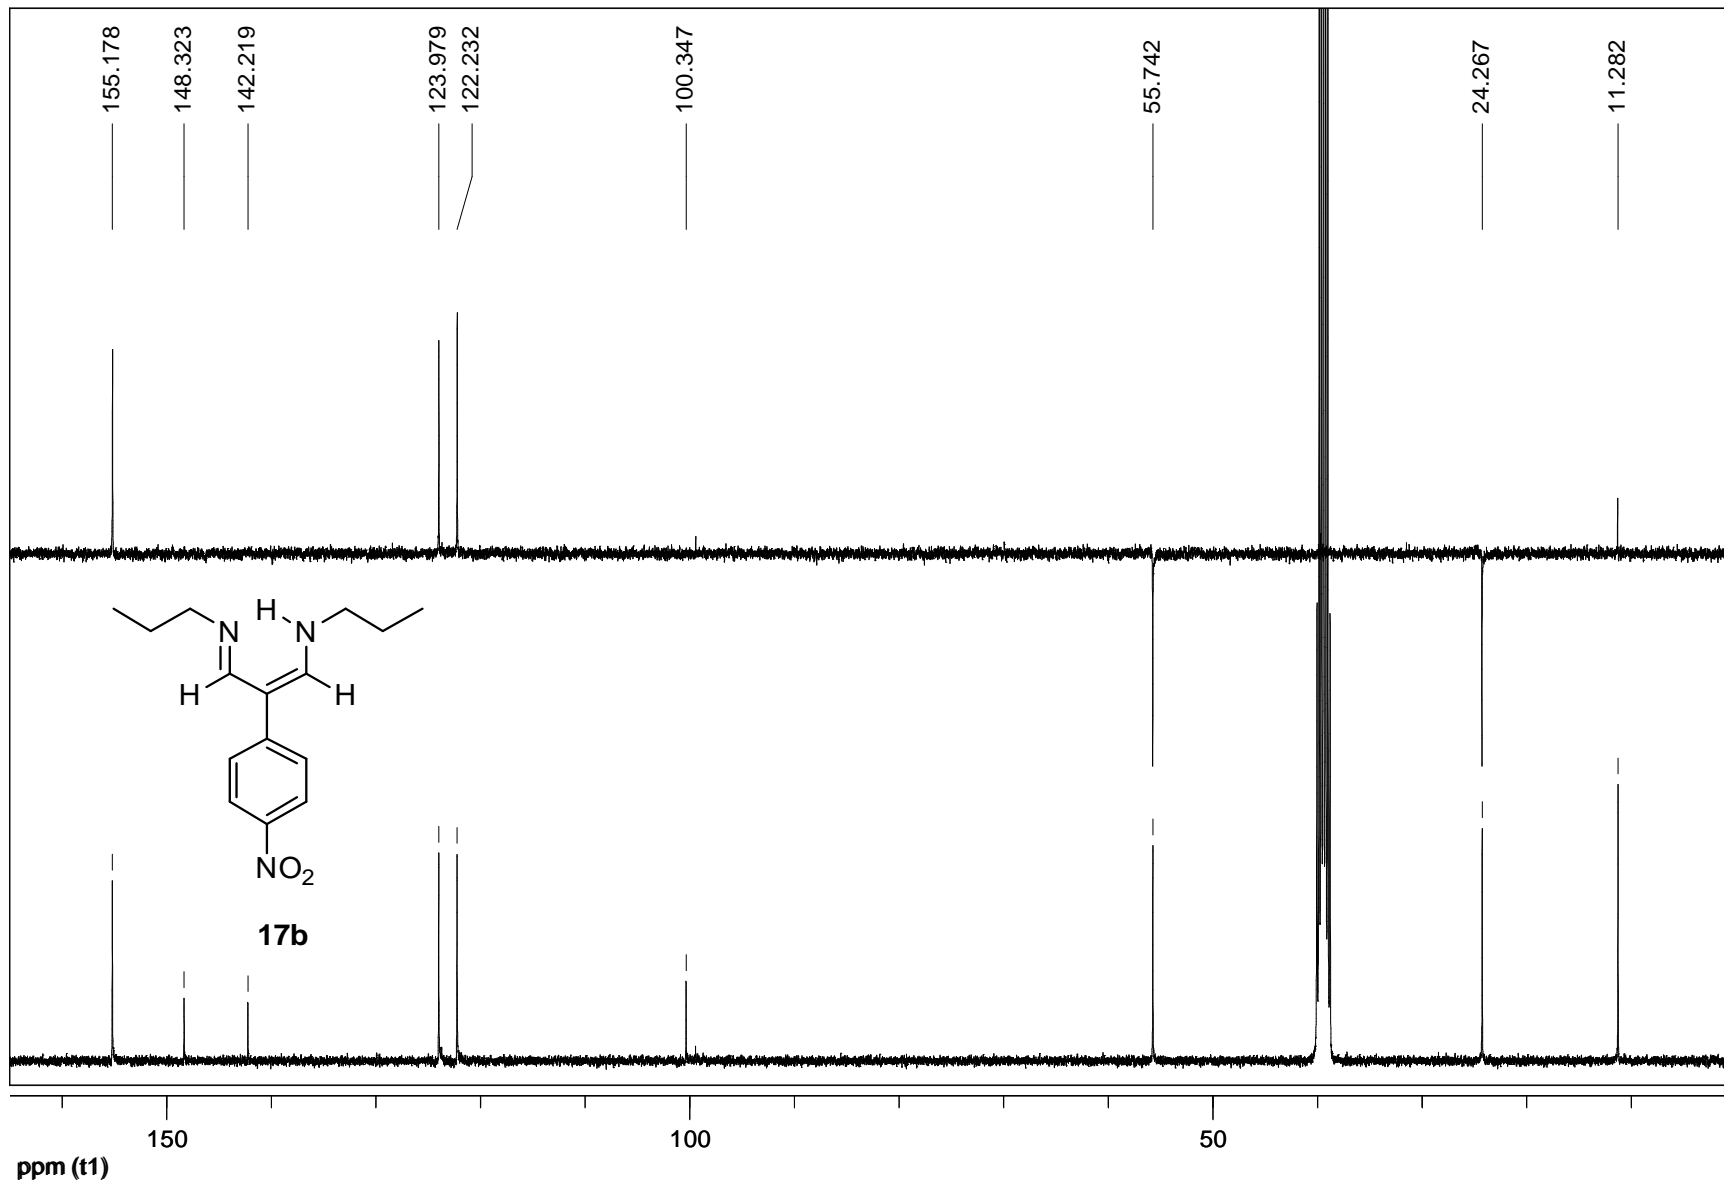

Compound 18:

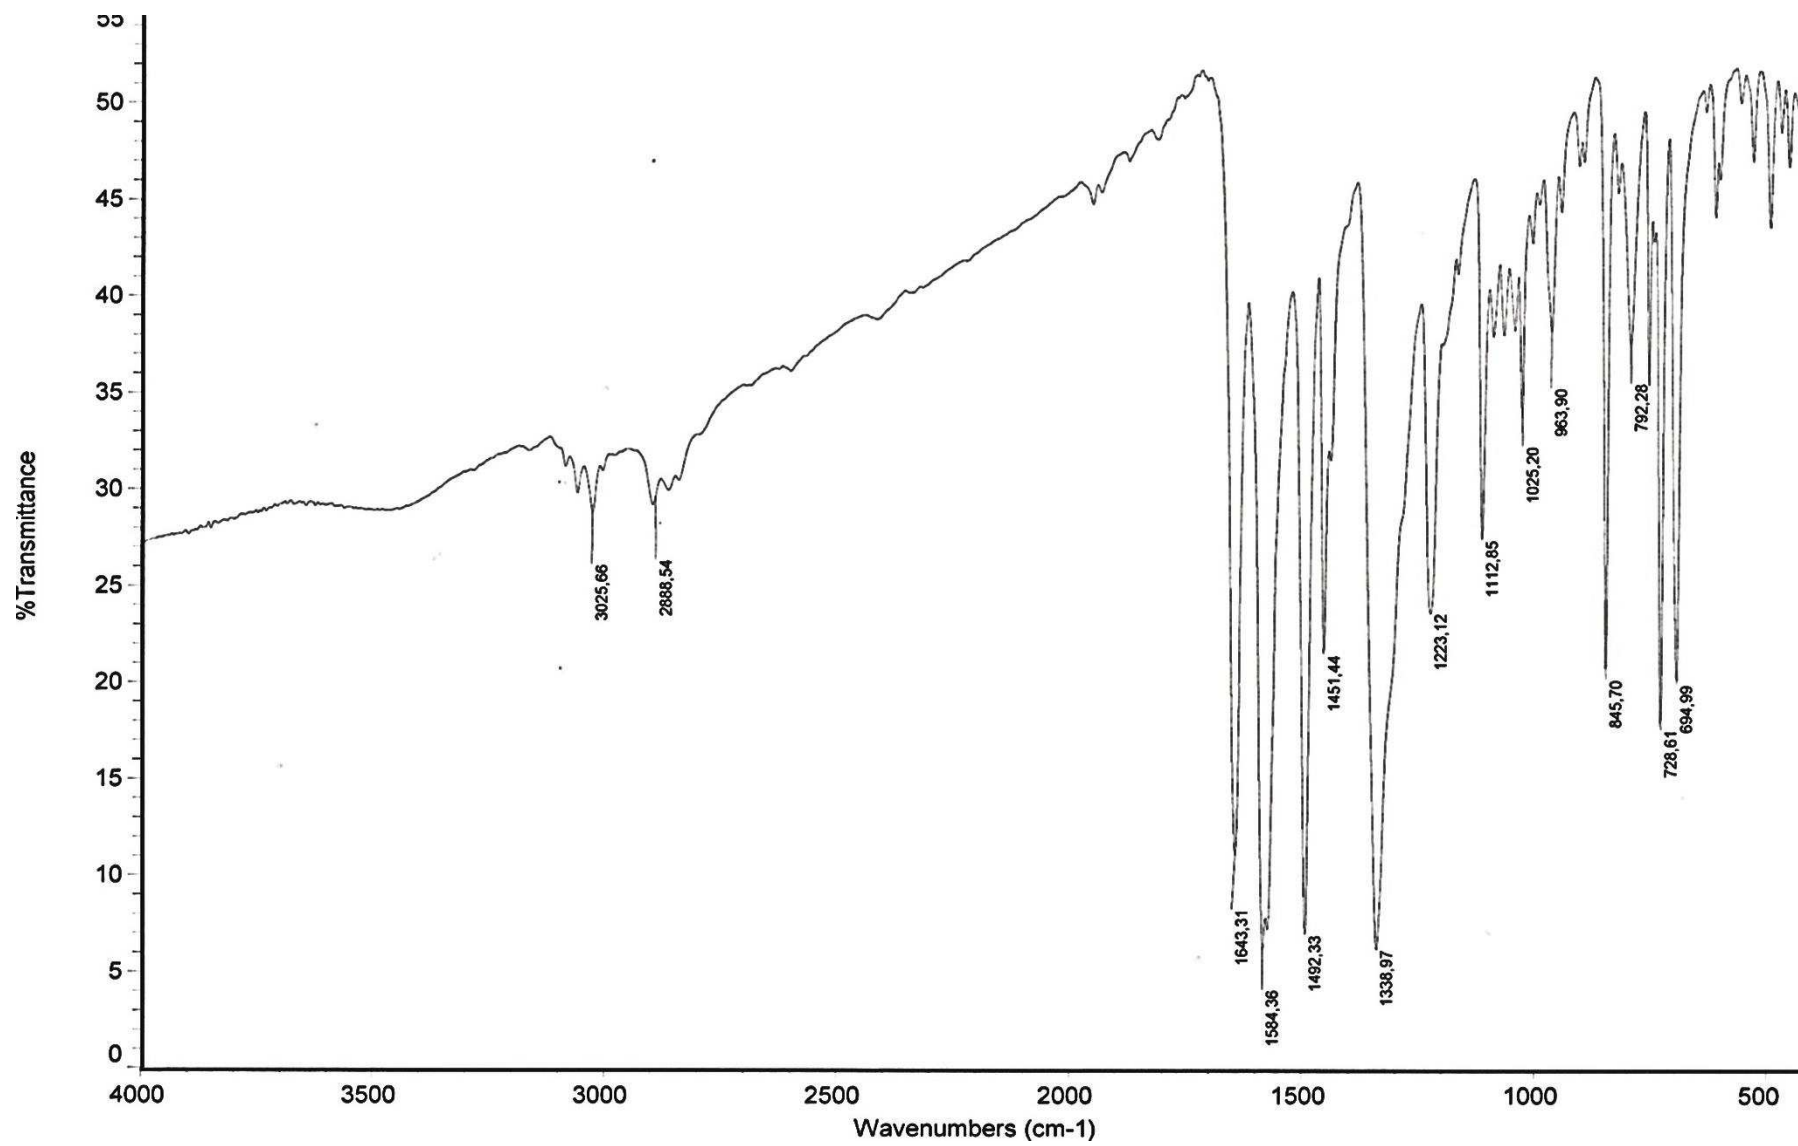

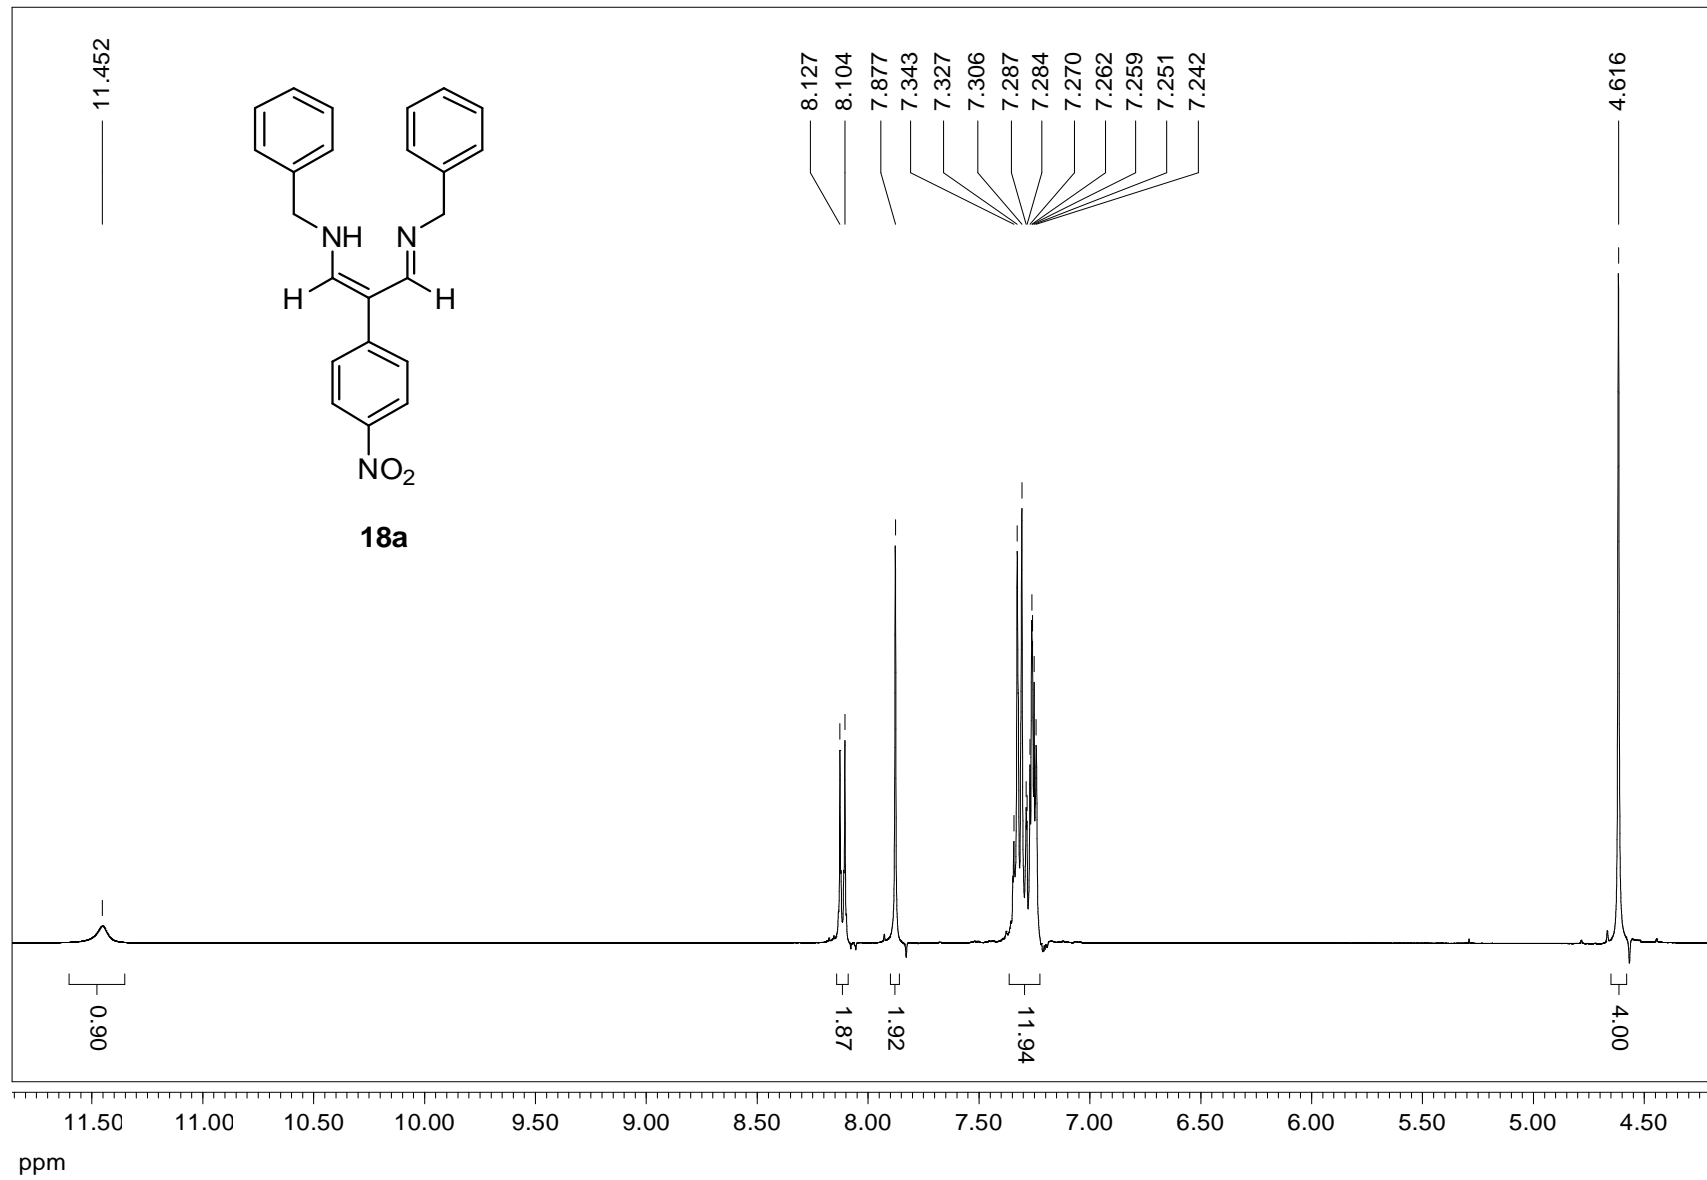



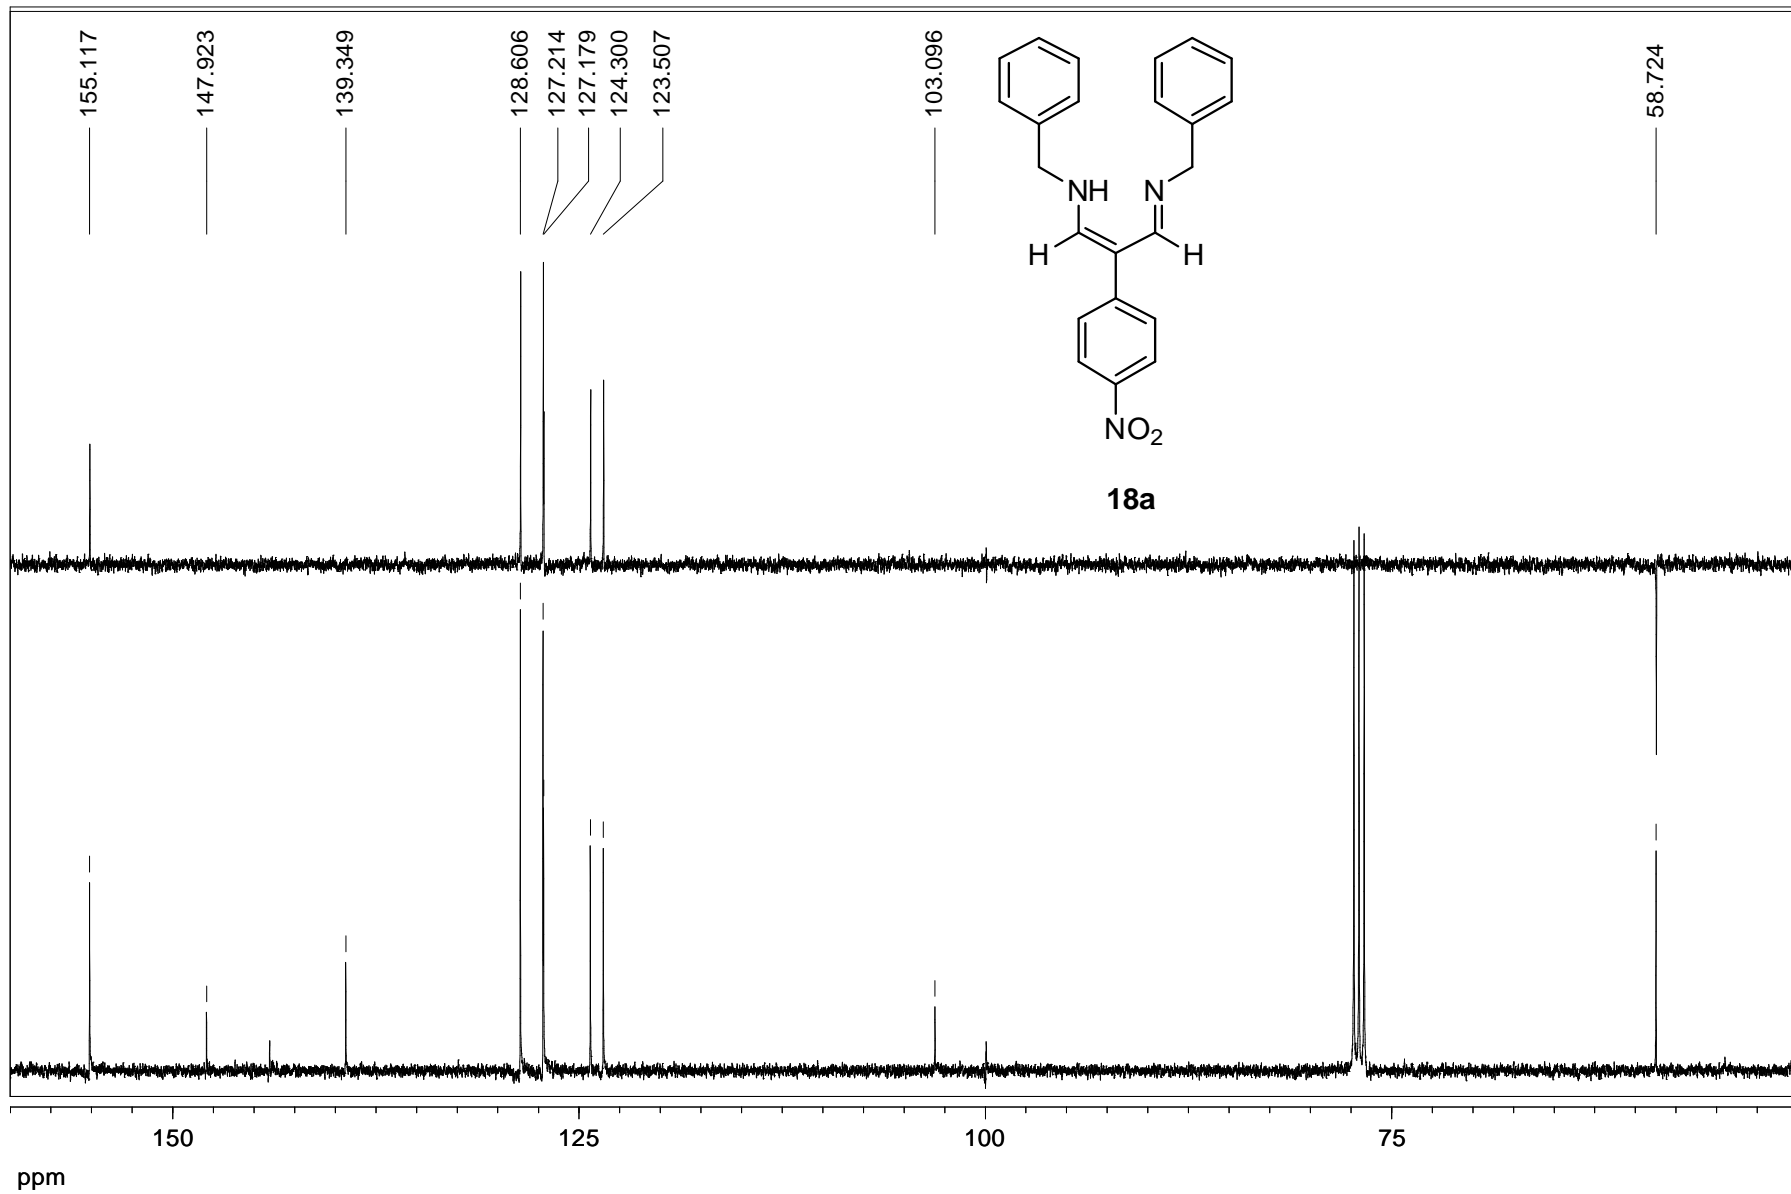

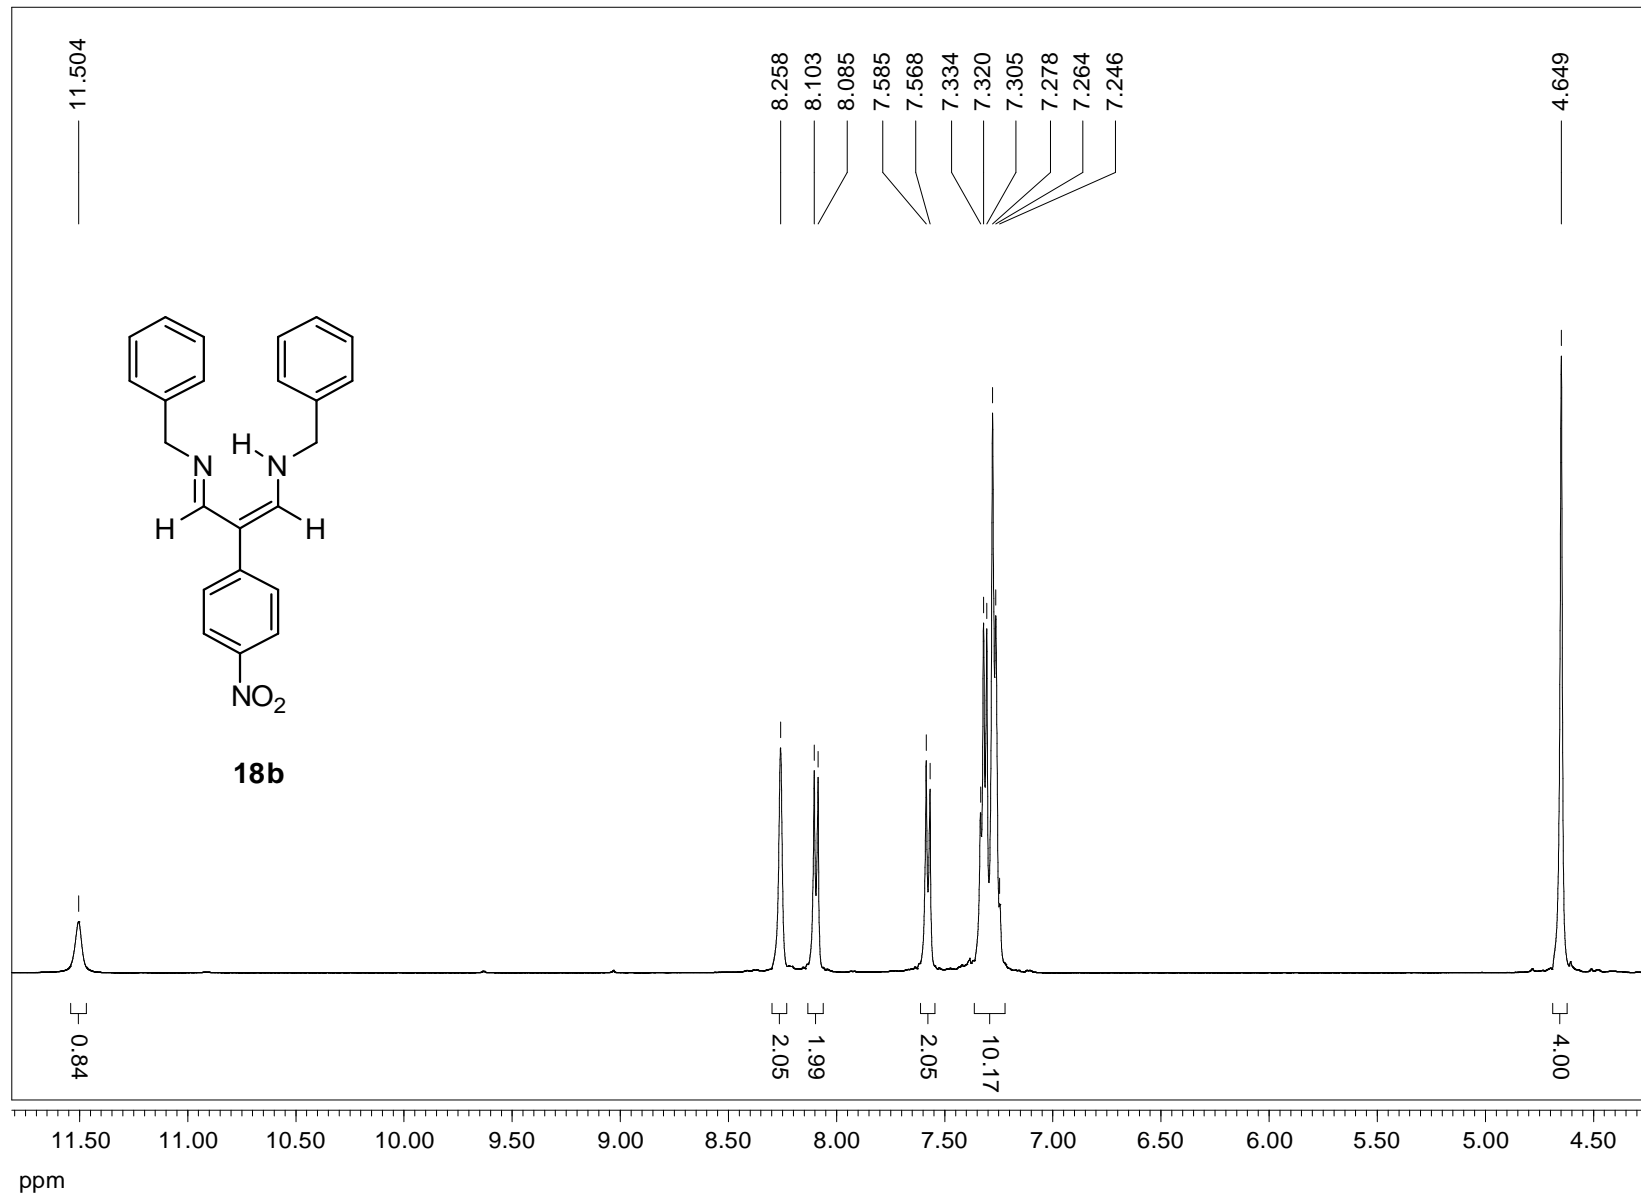

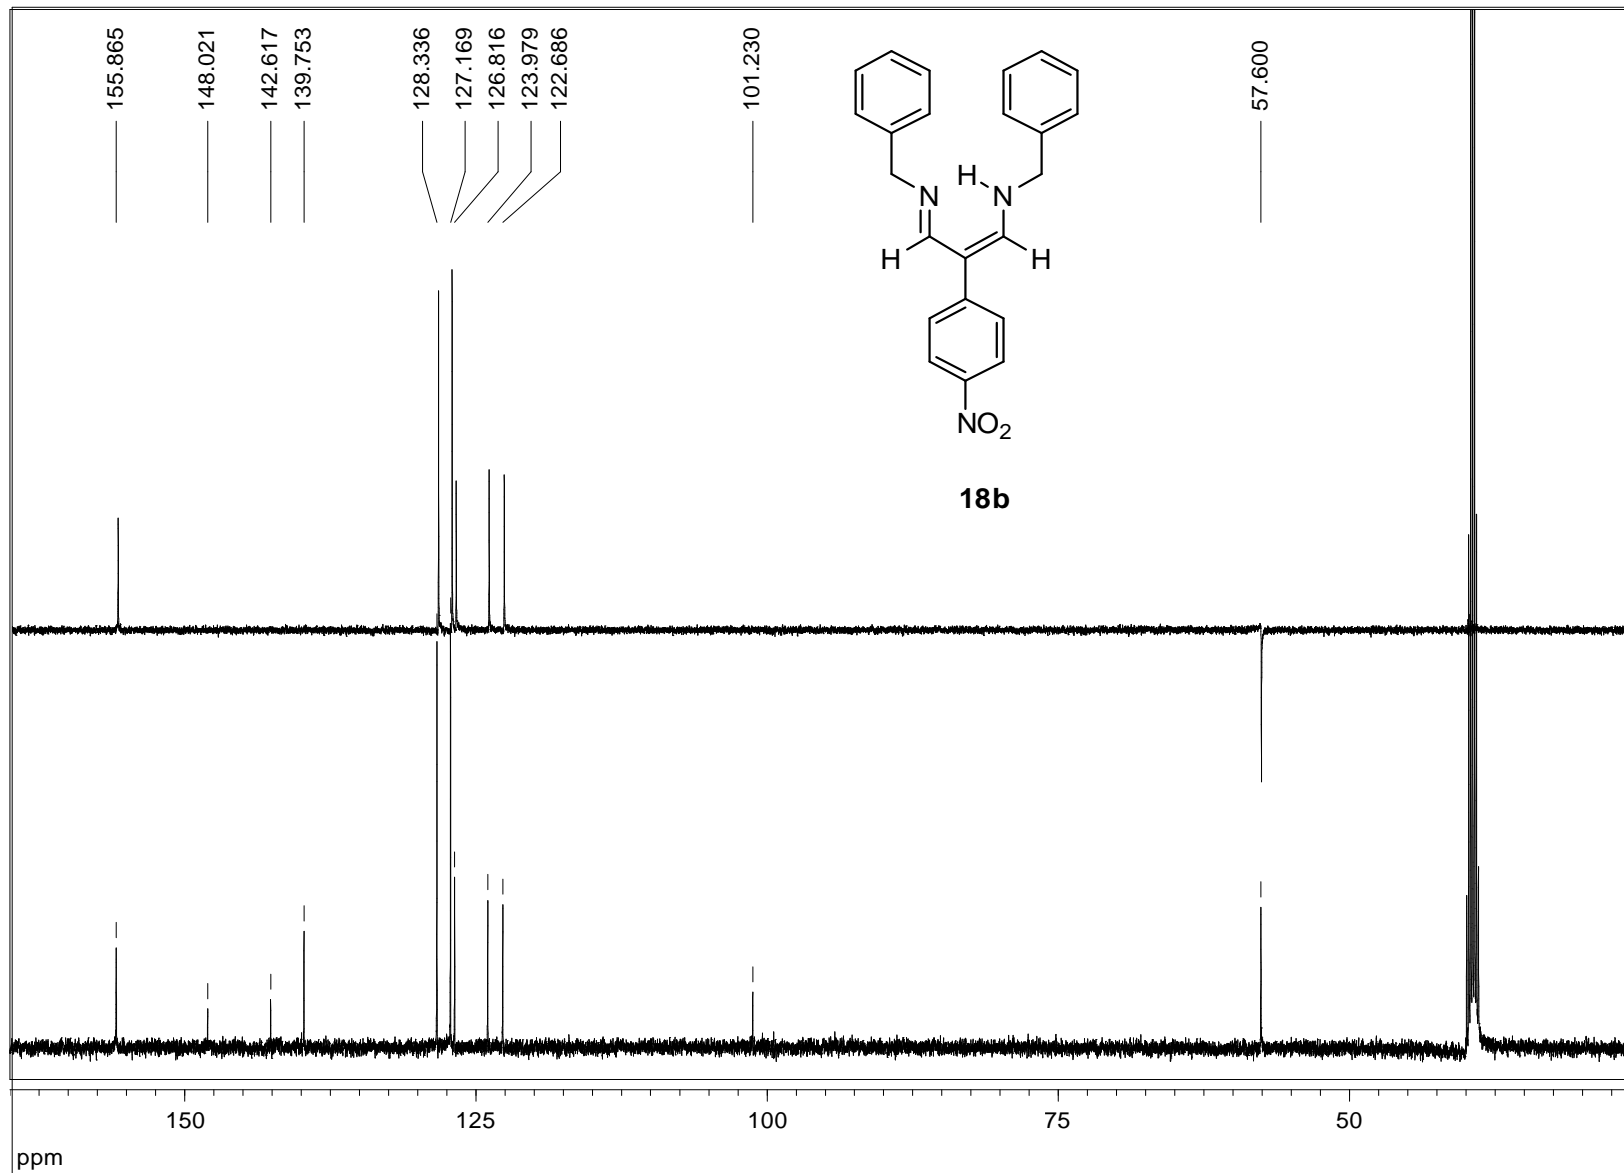

Compound 19:

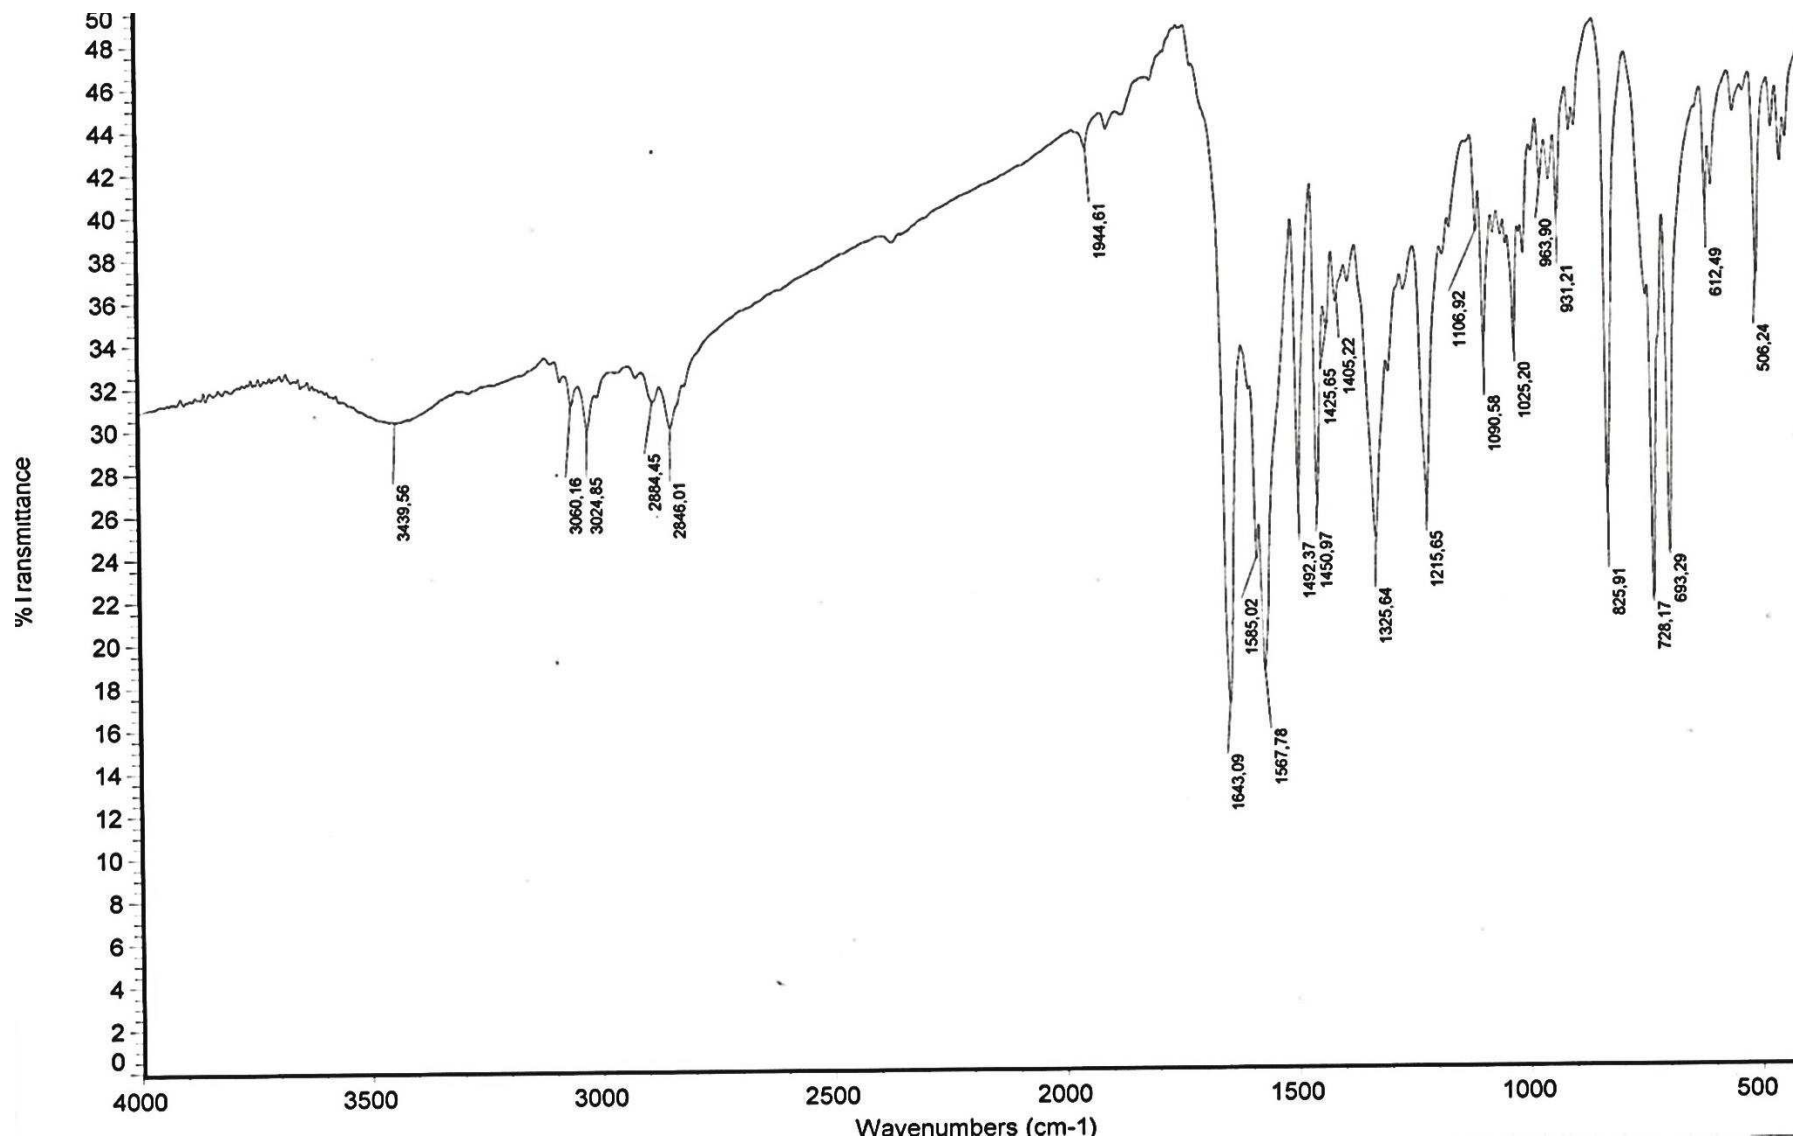

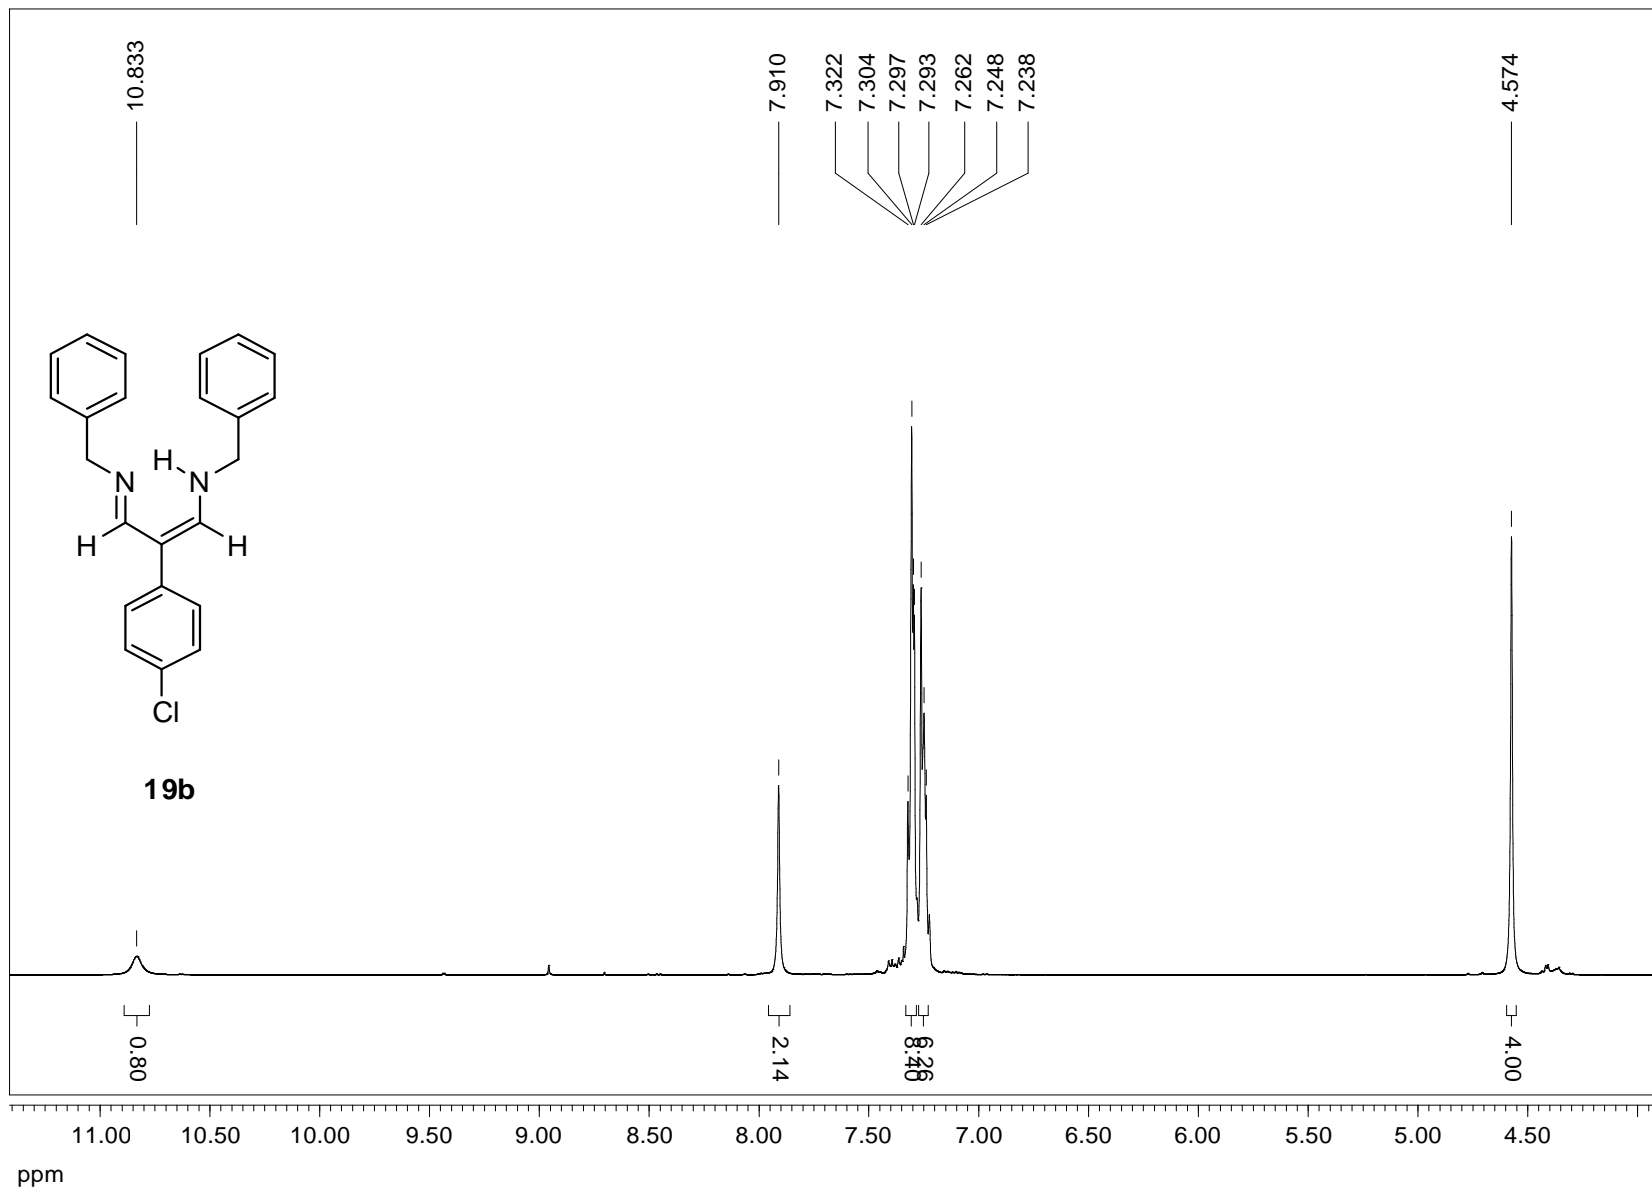

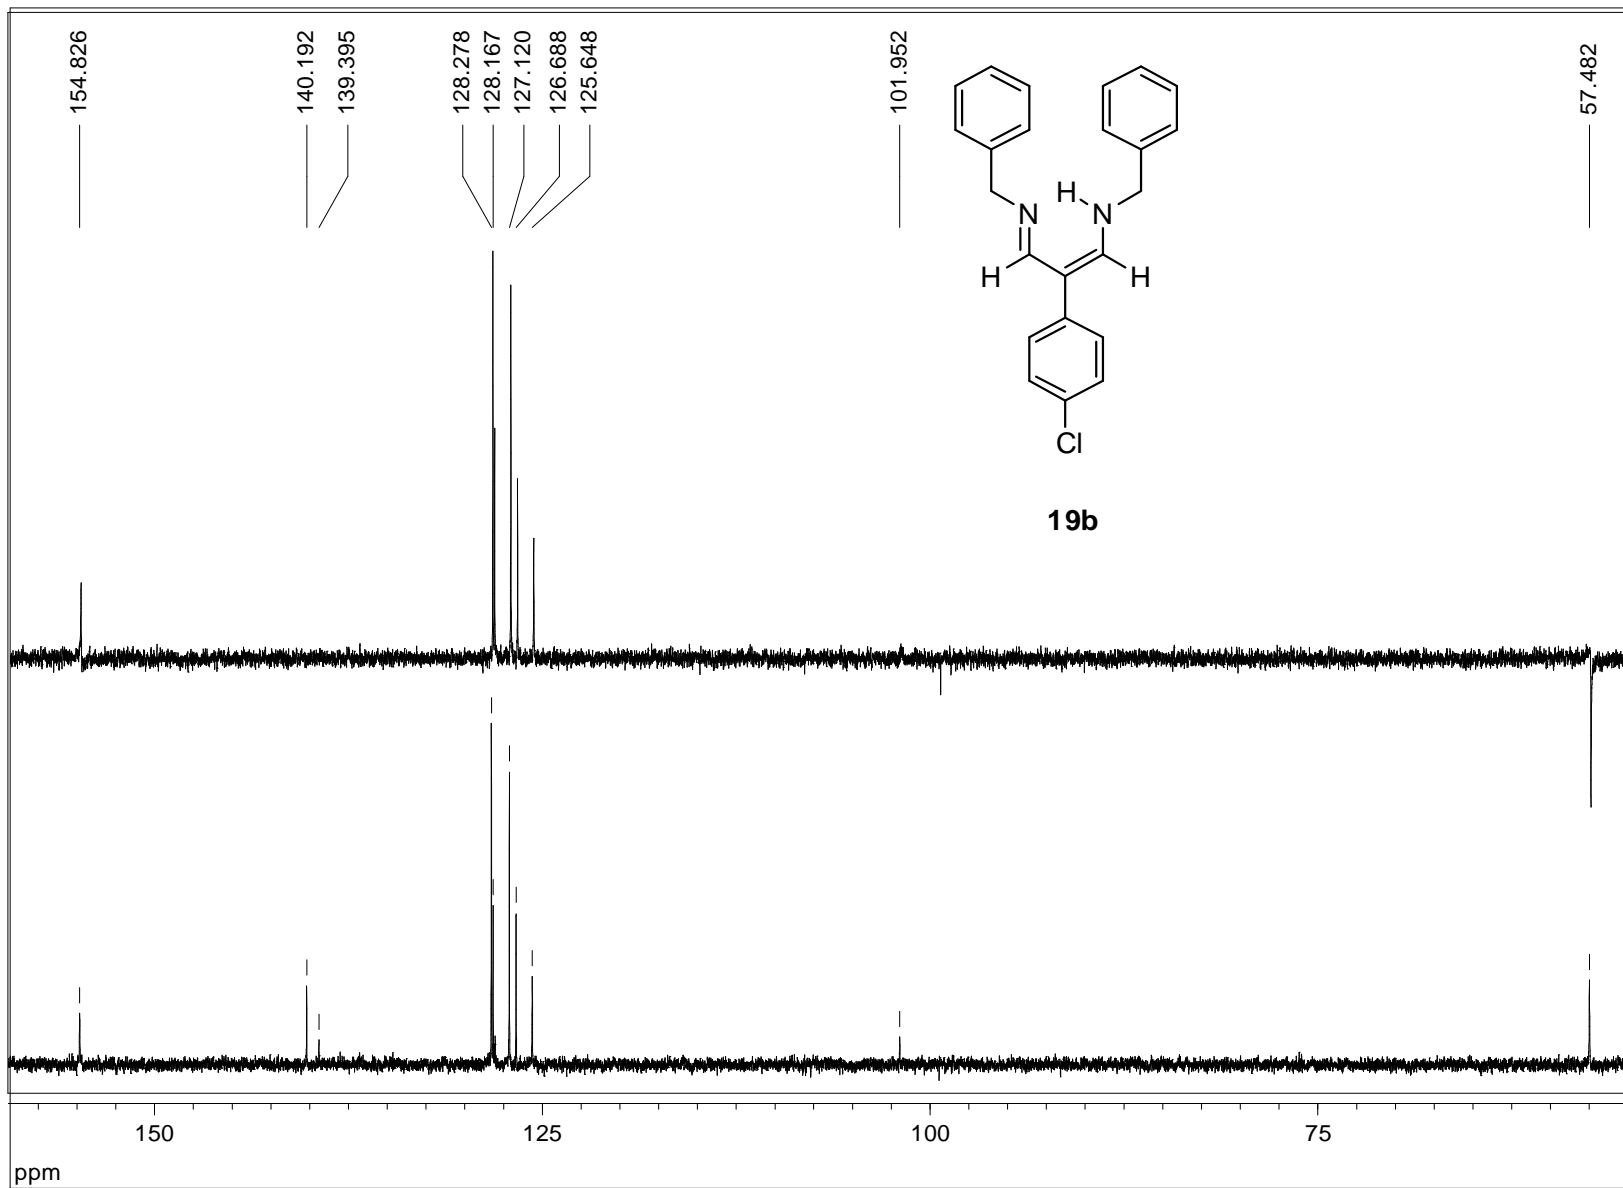

Compound 20:

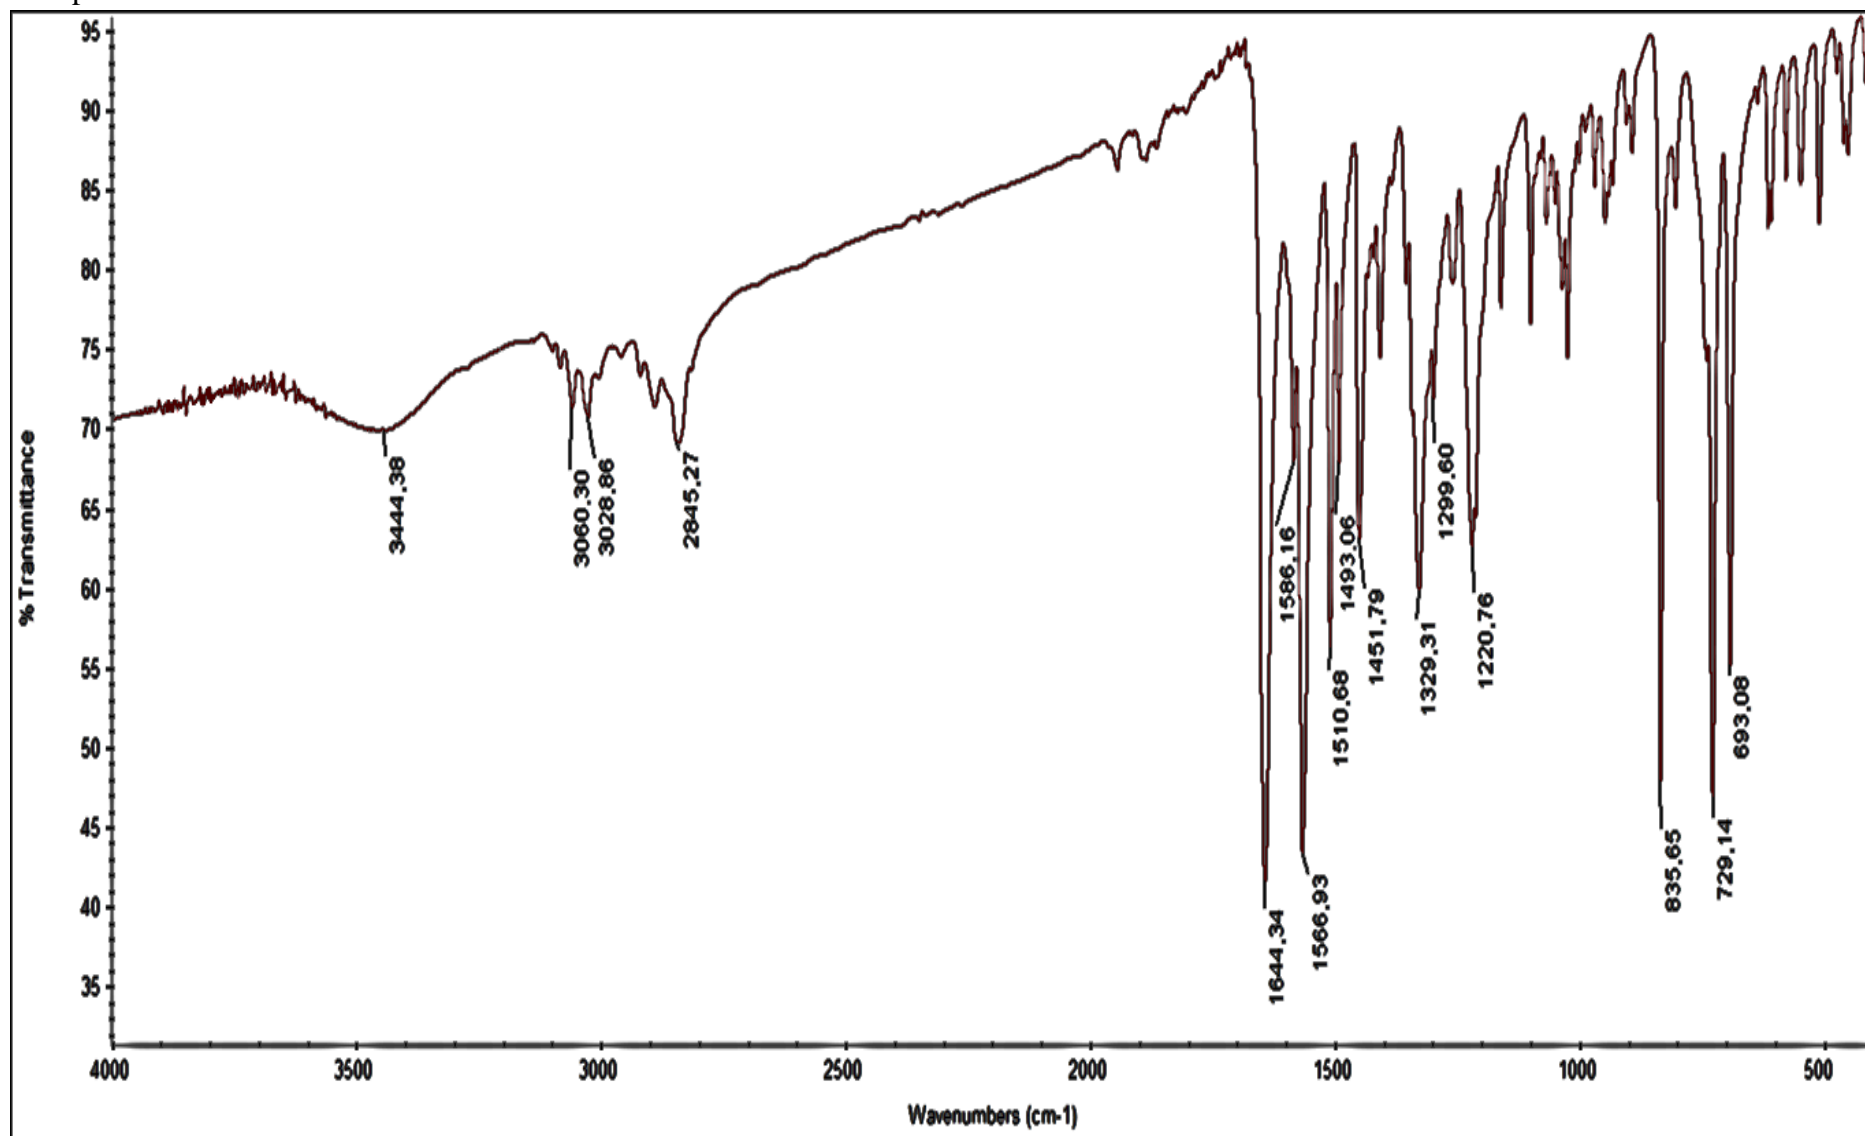

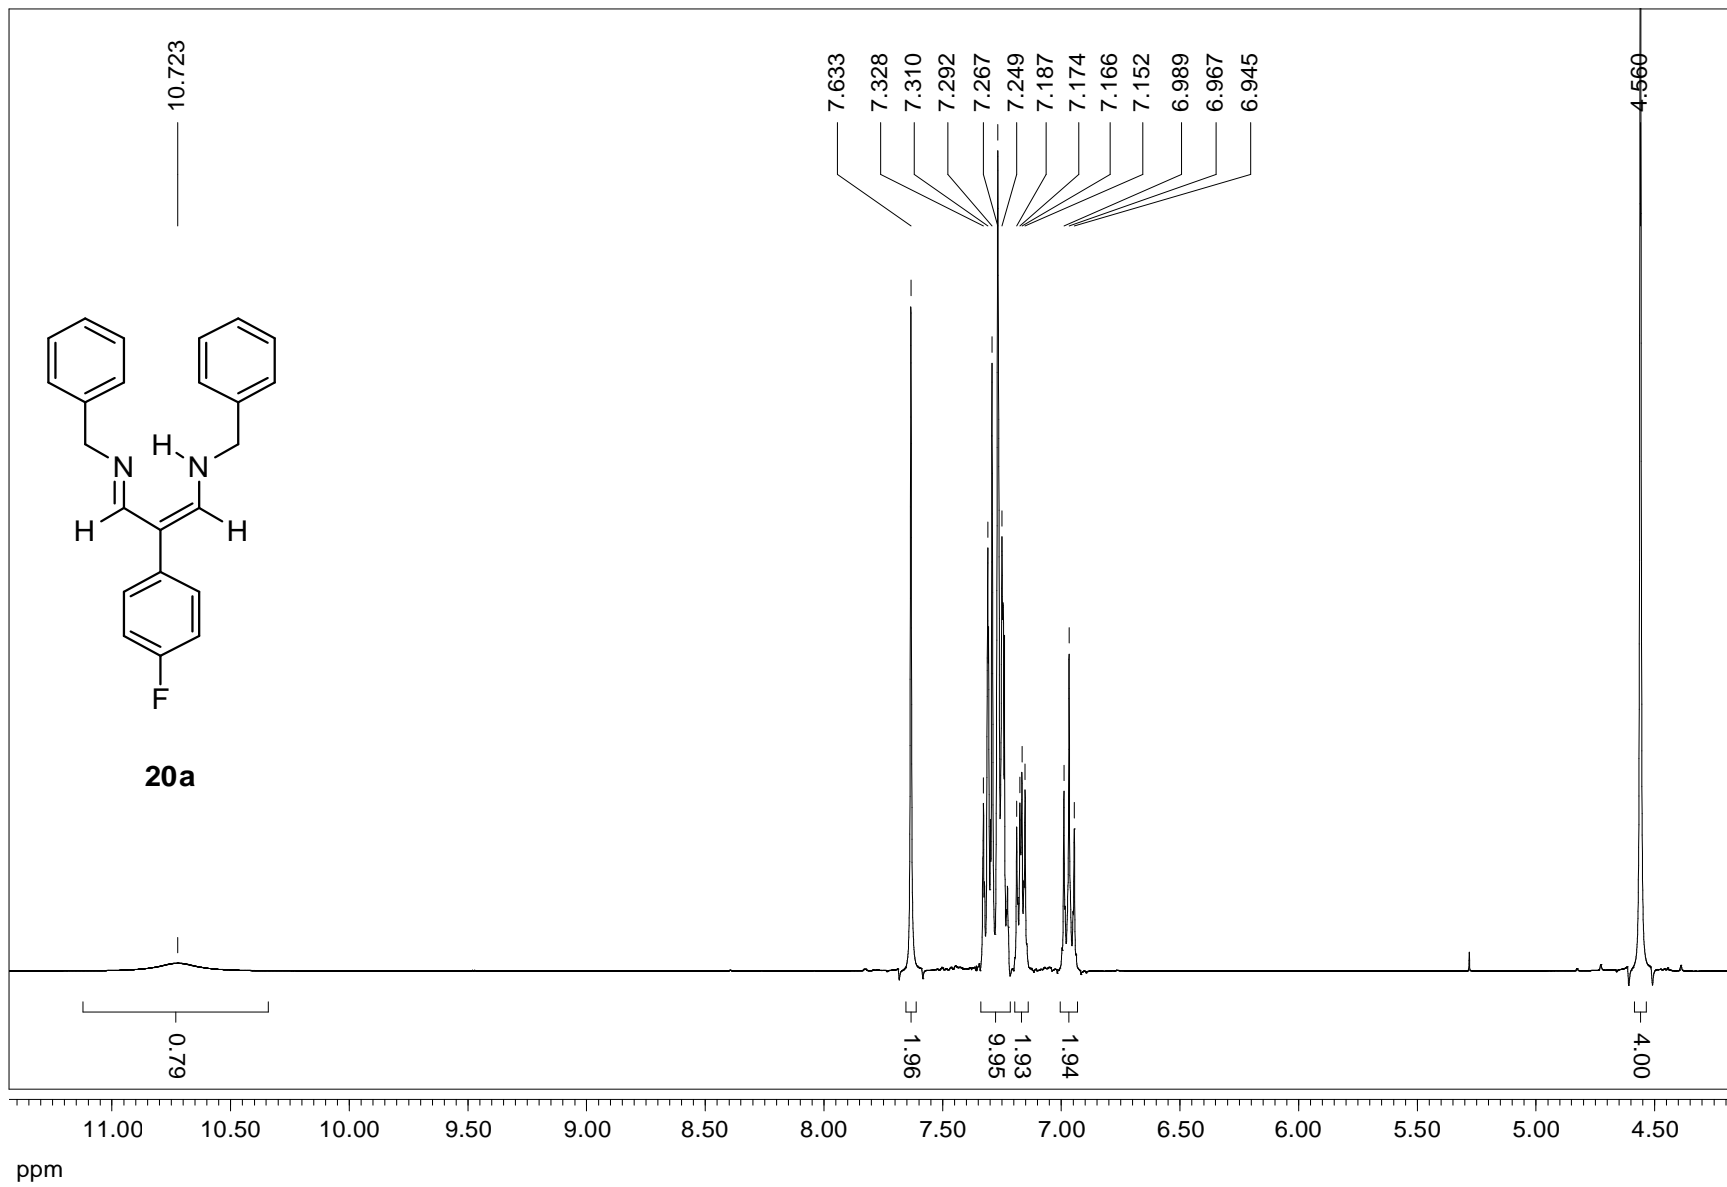



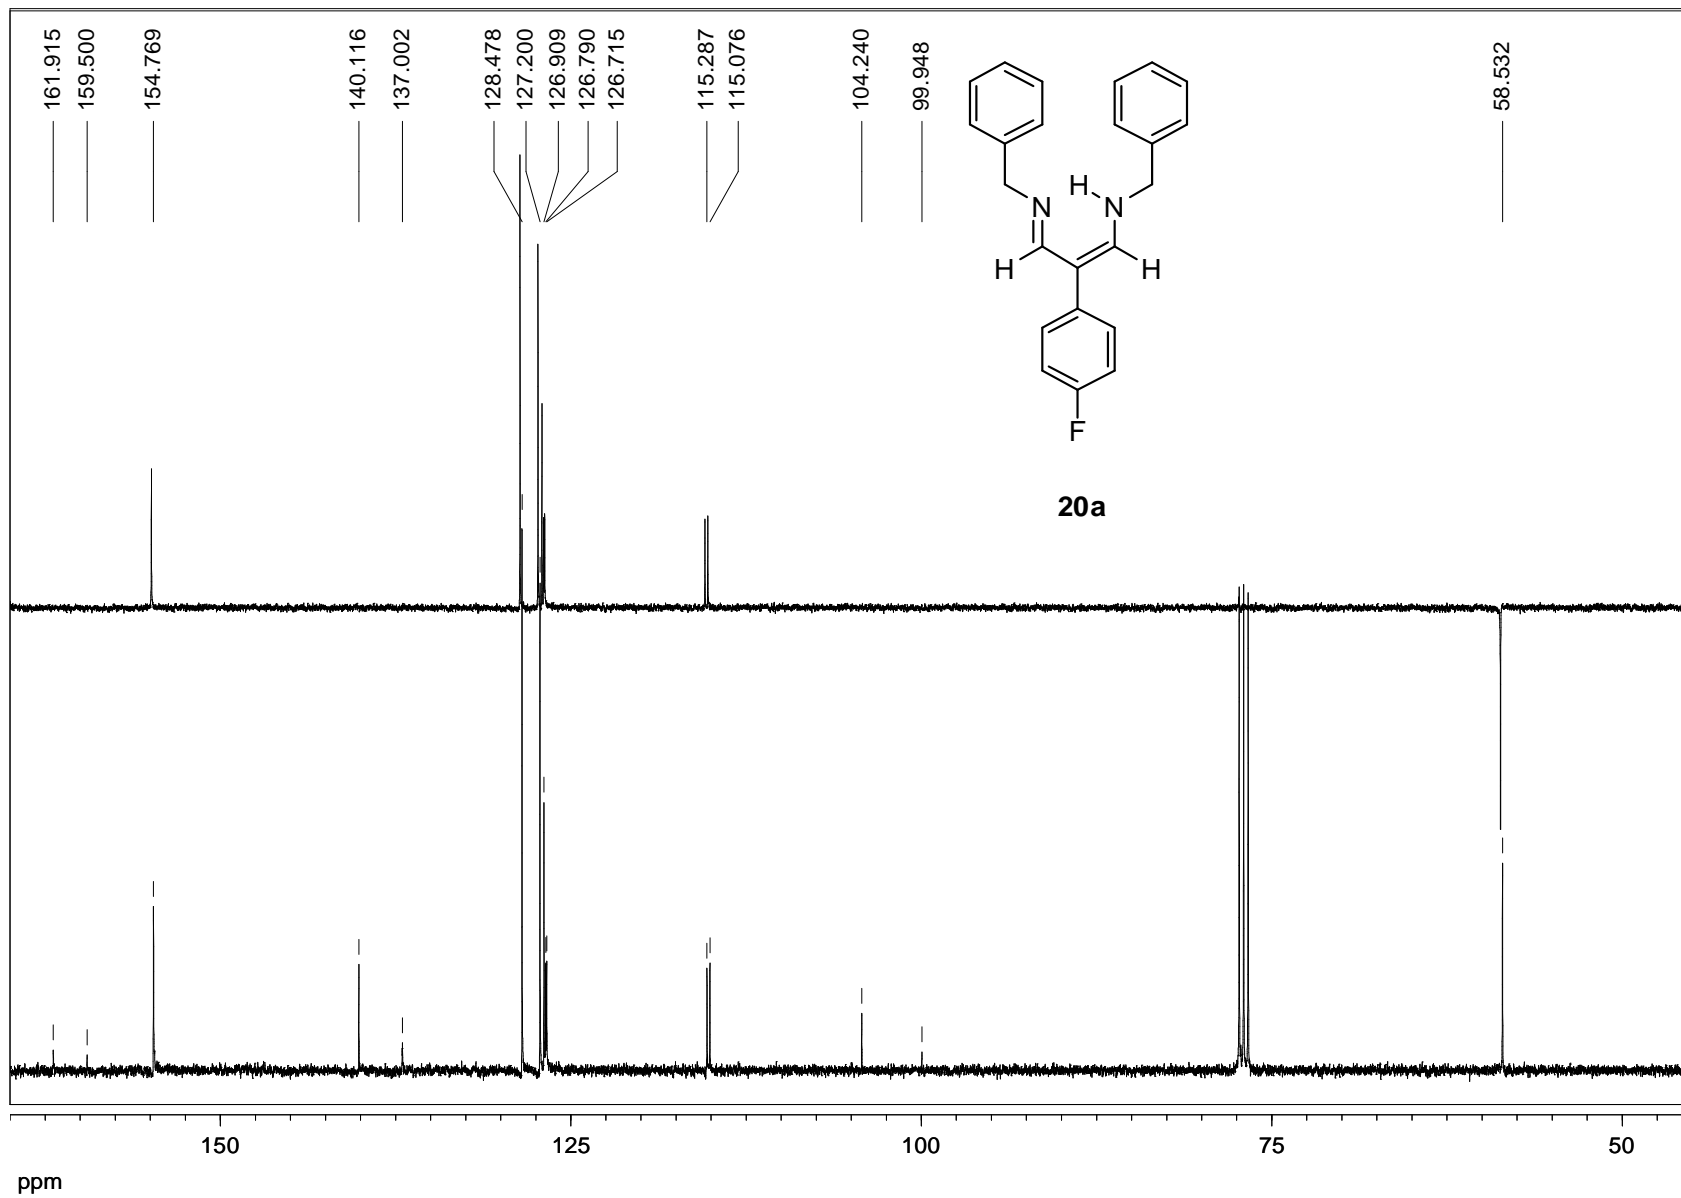

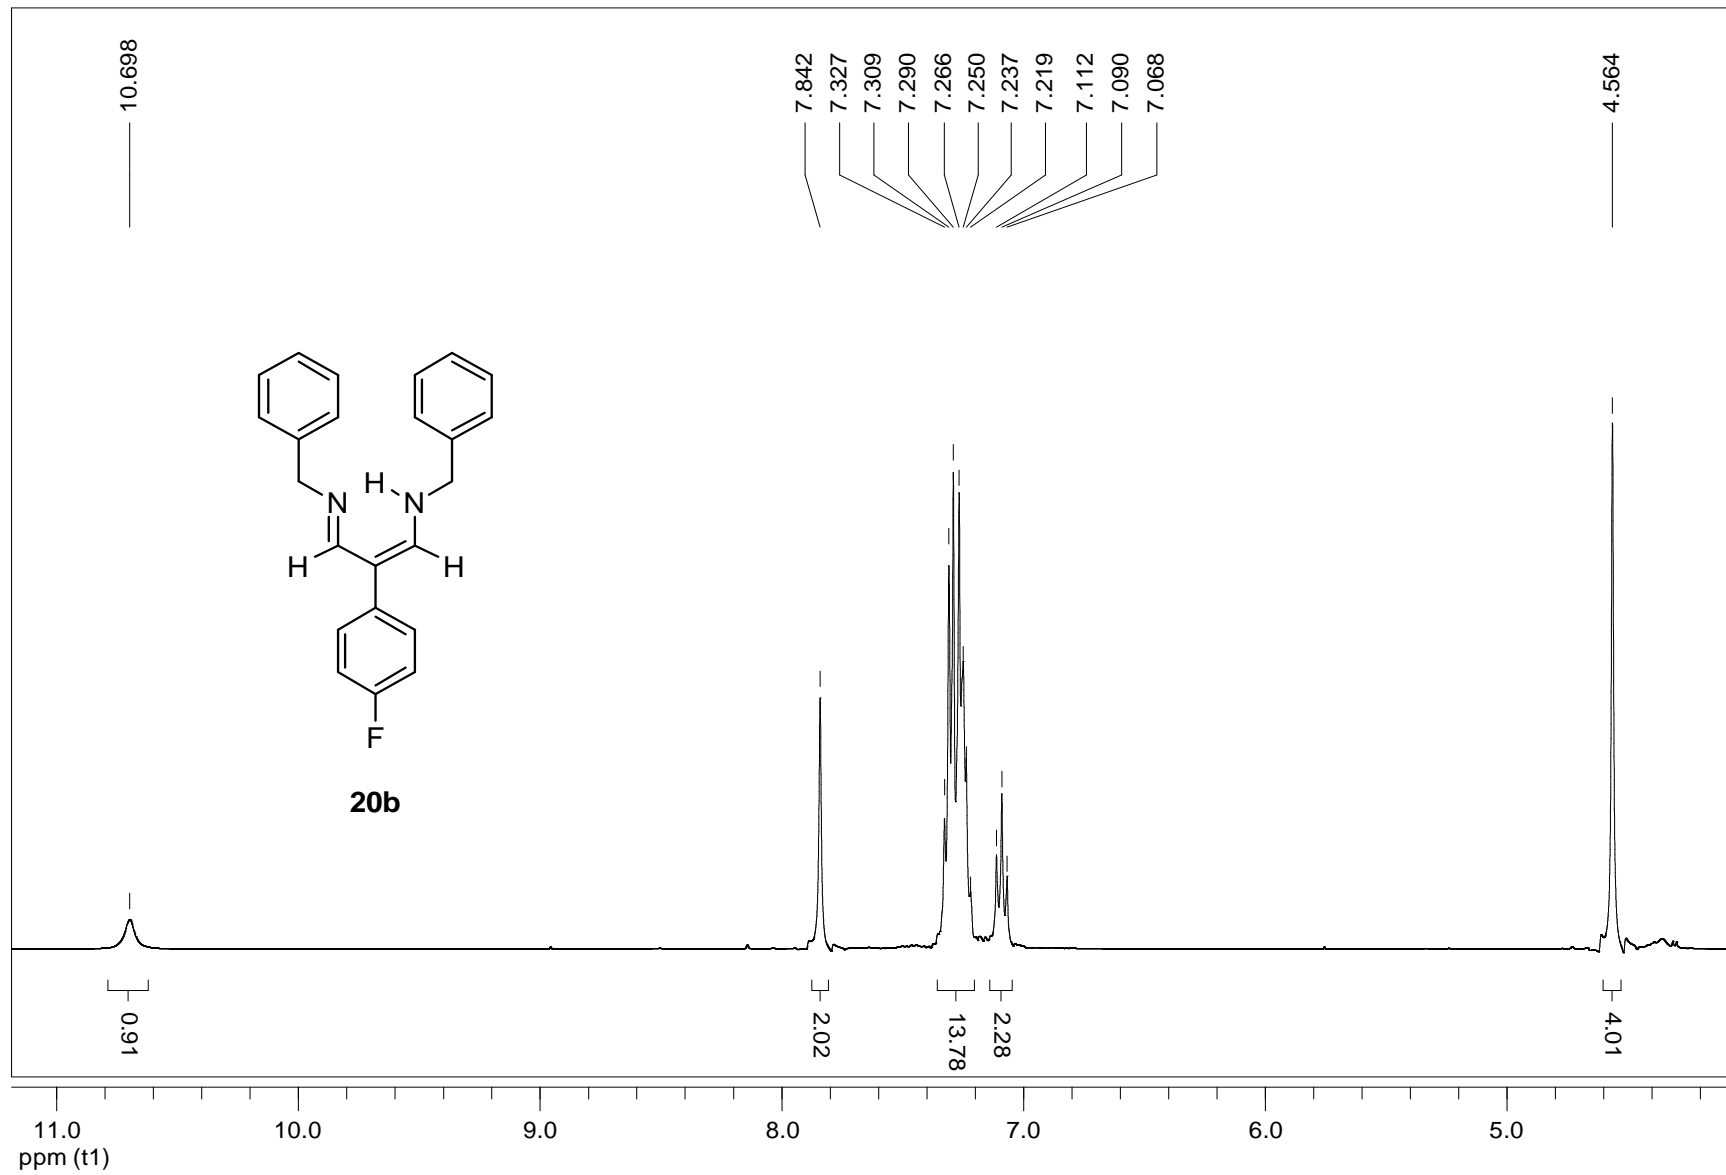

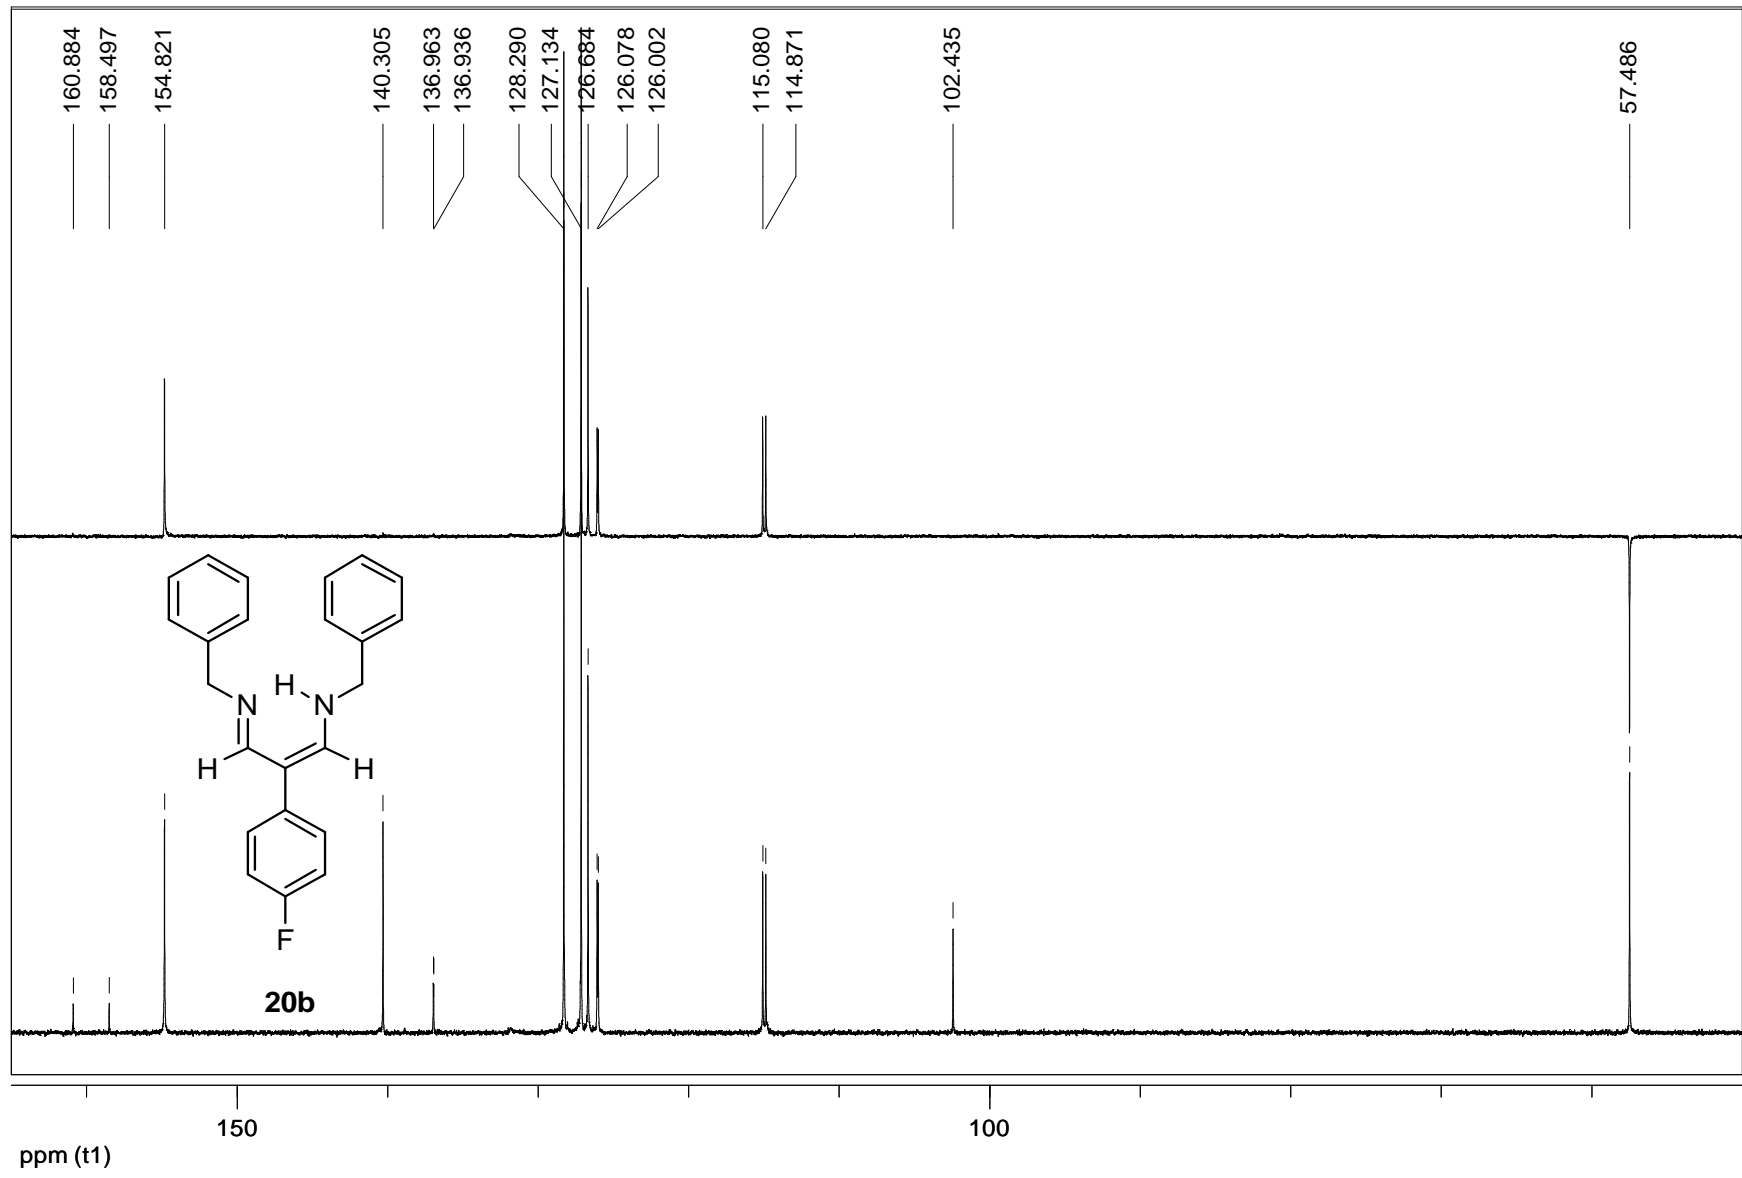

Compound 22:

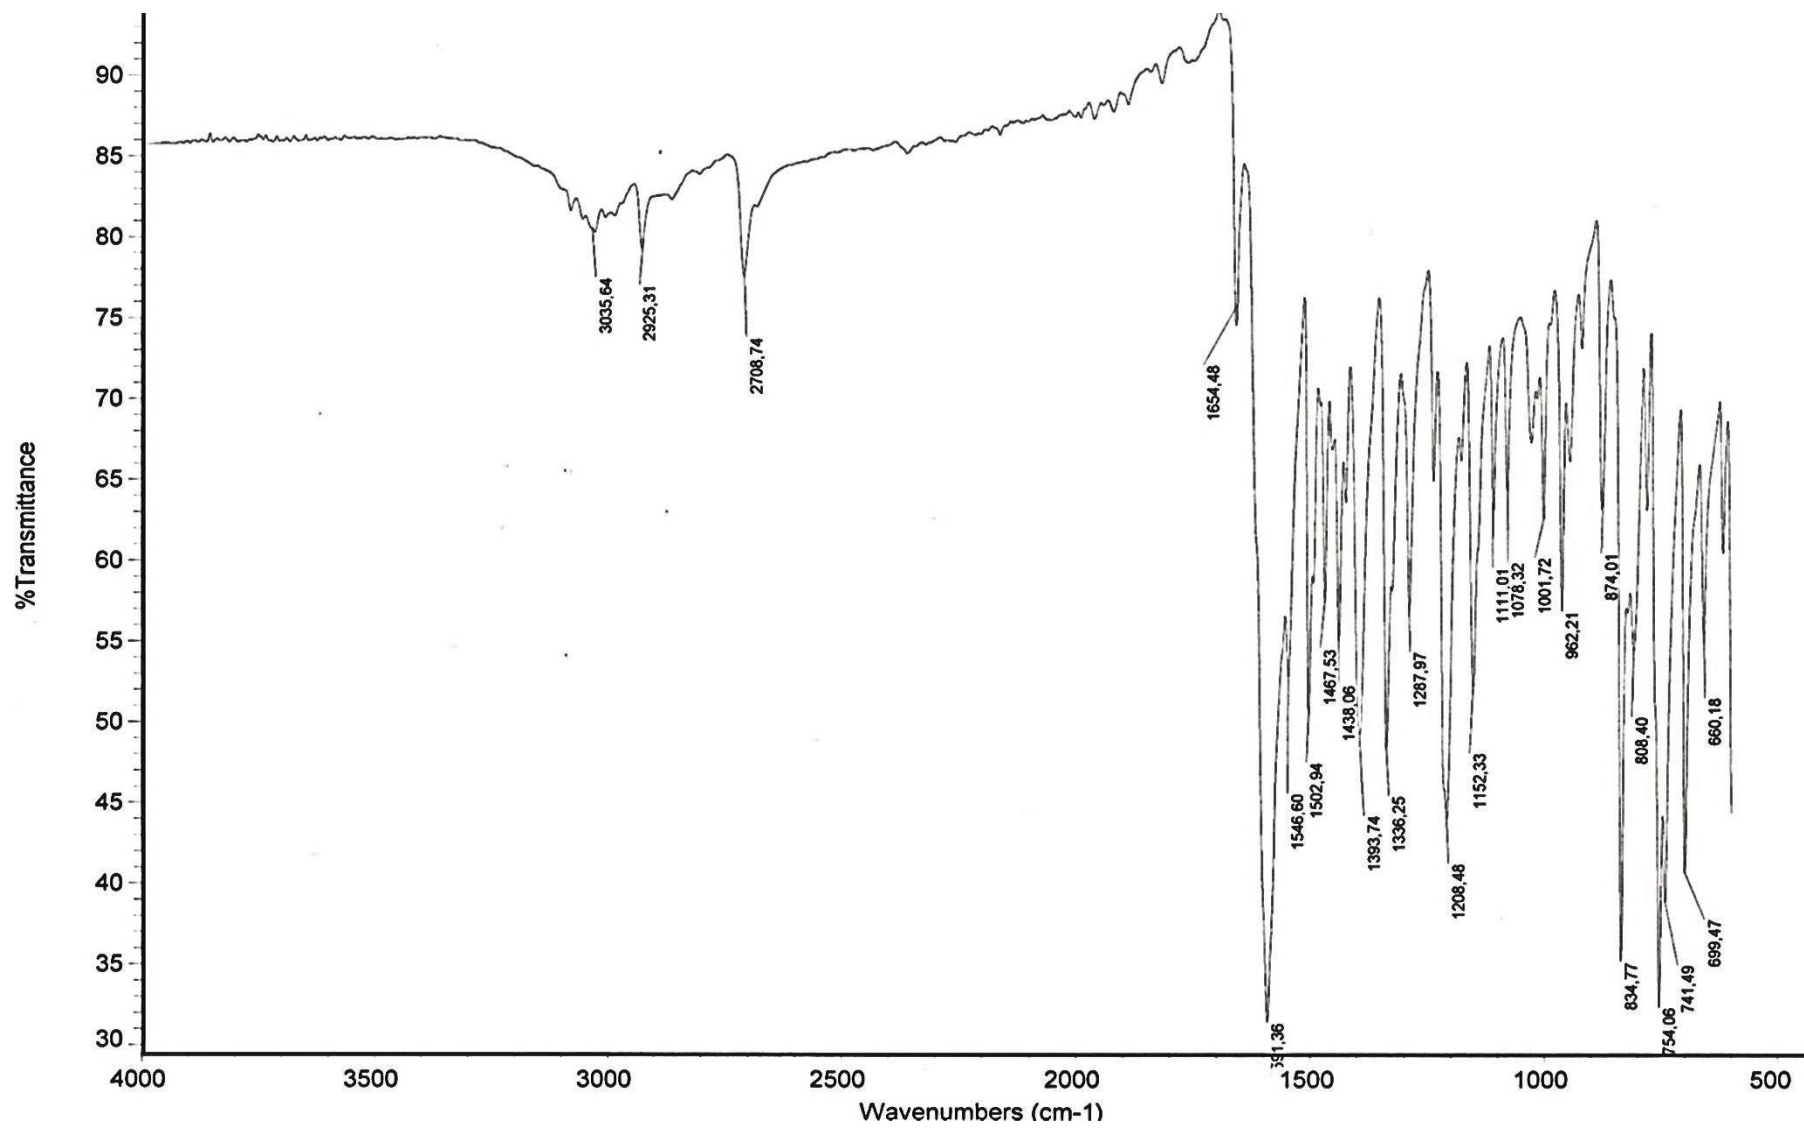

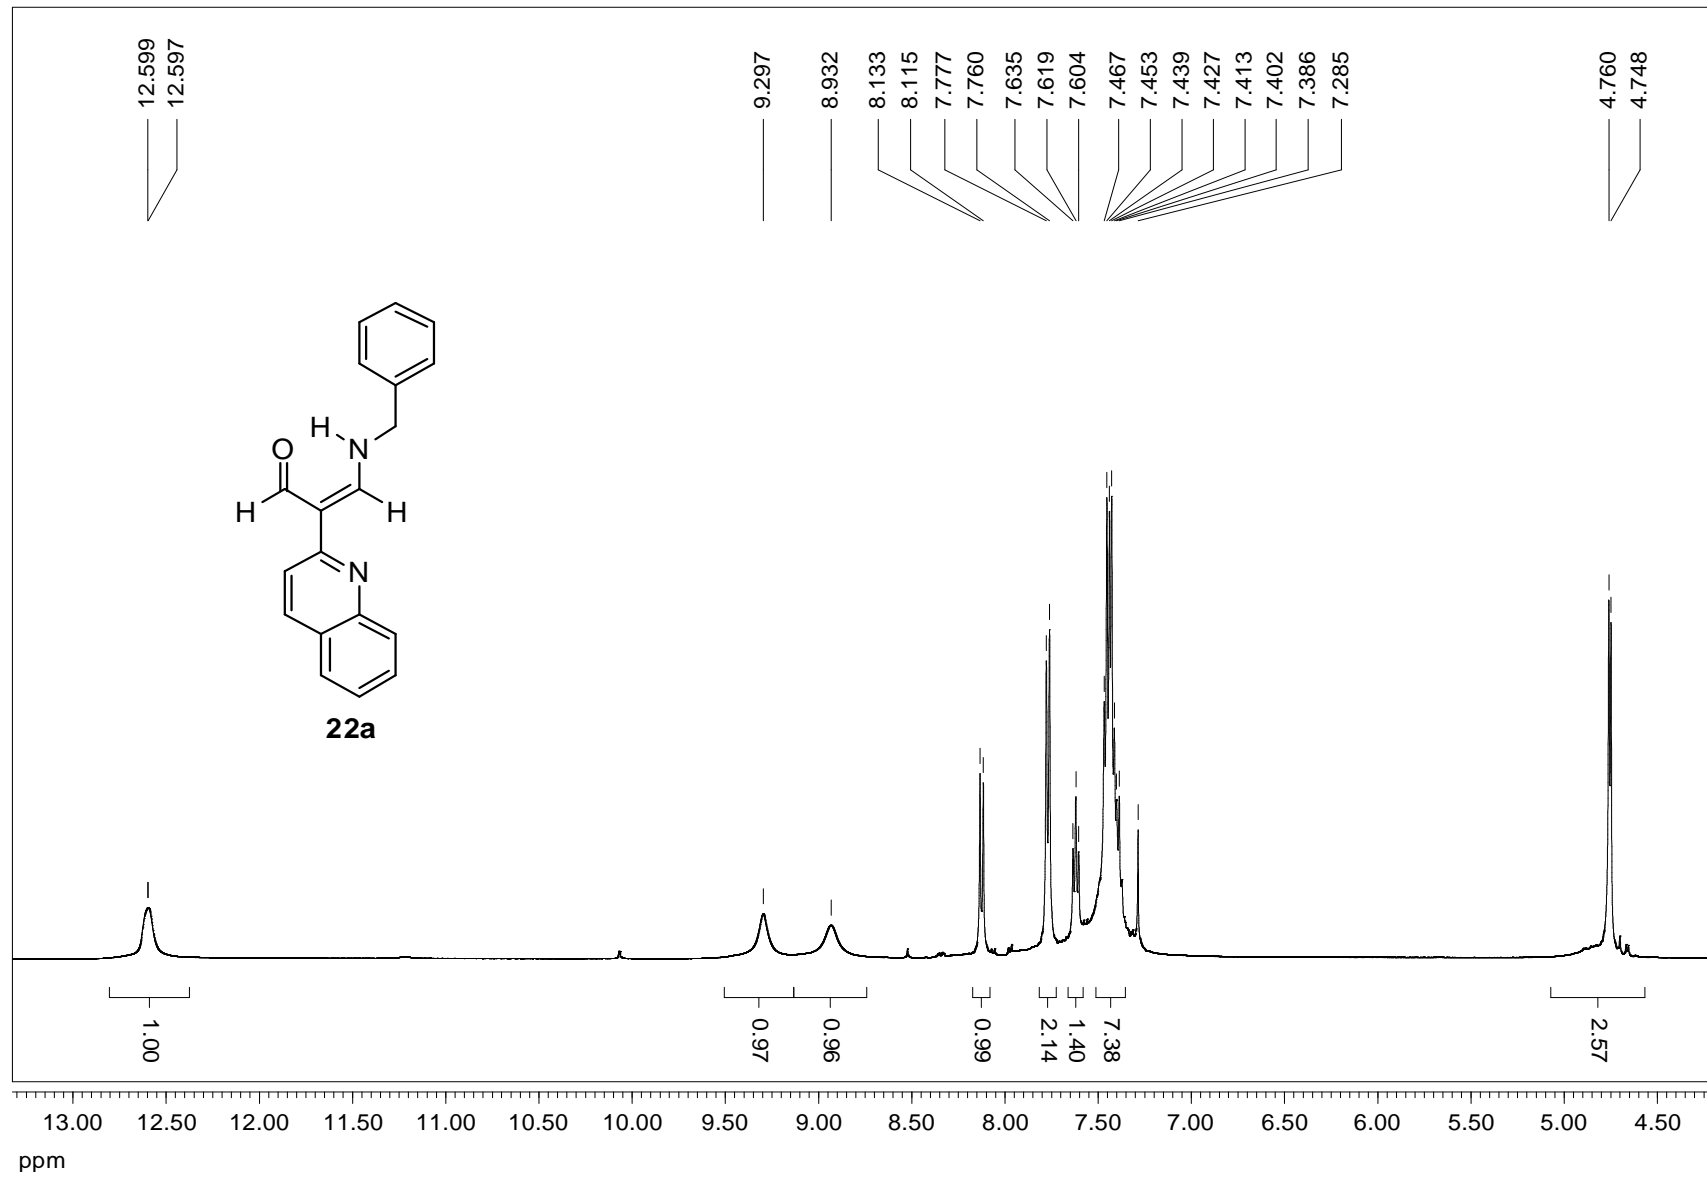

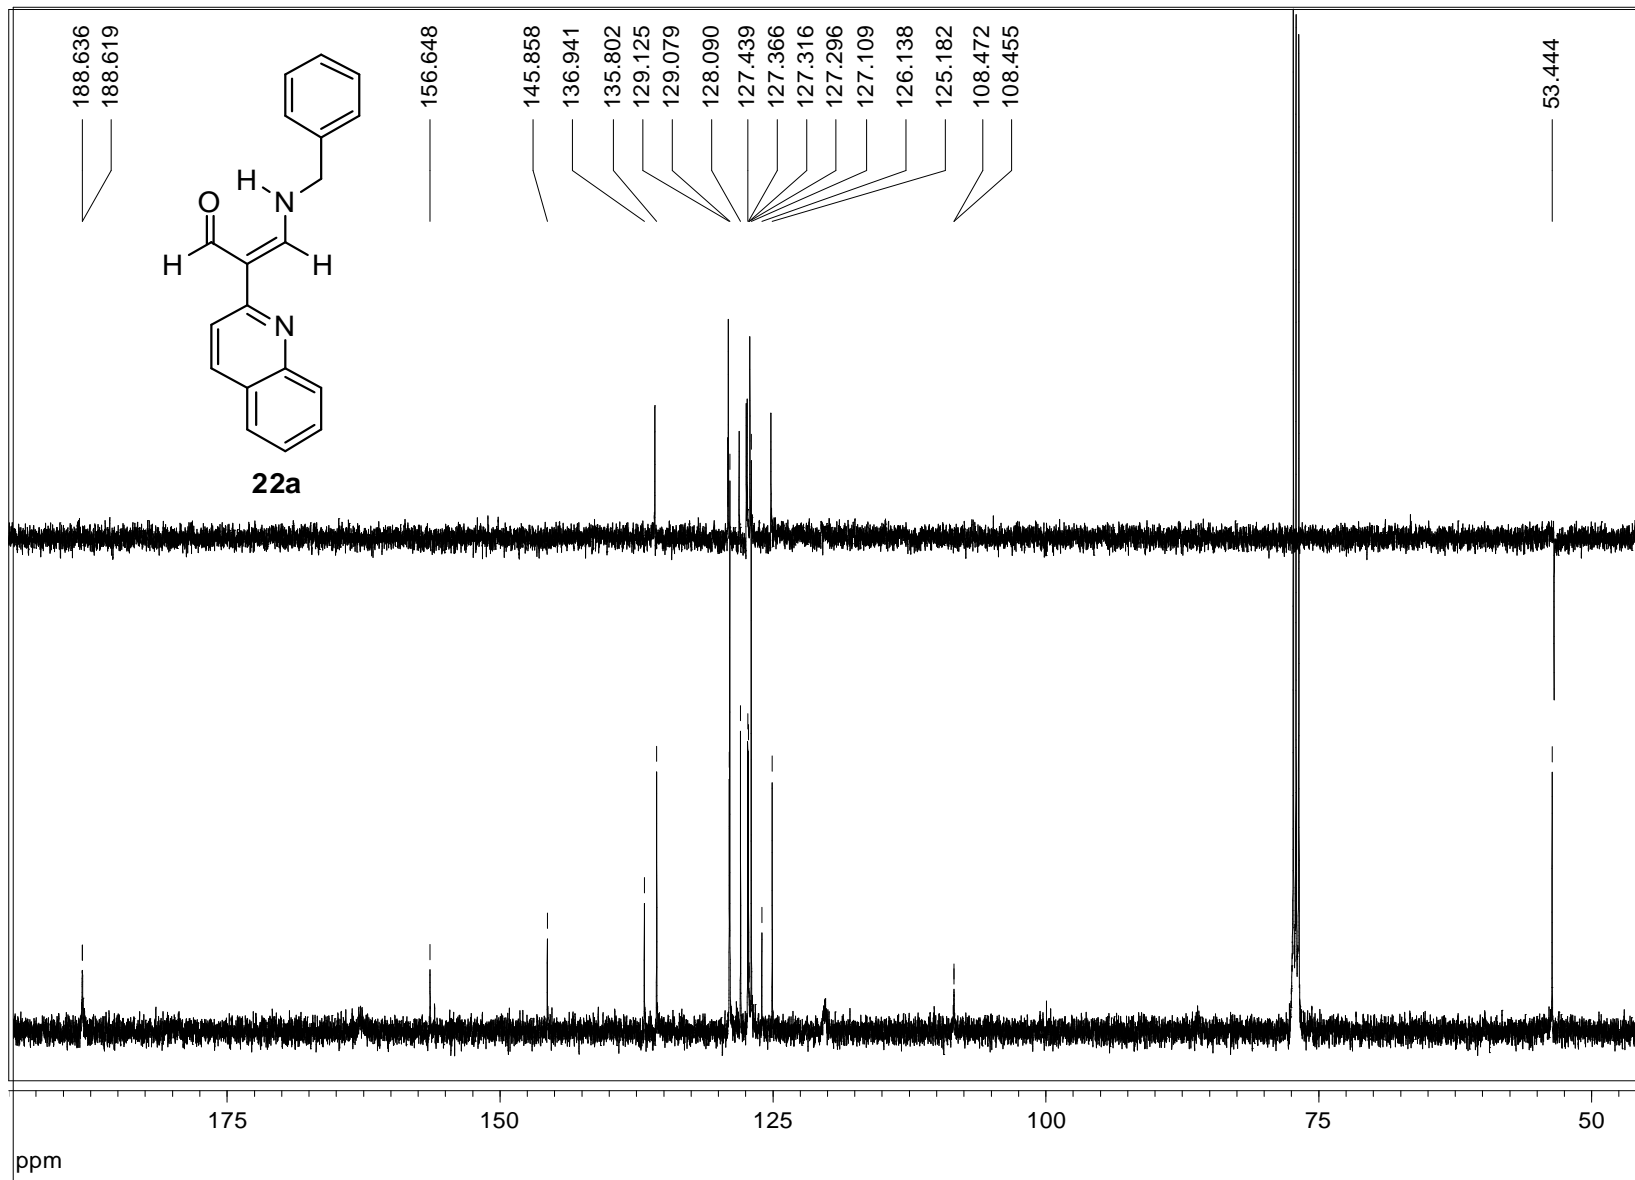

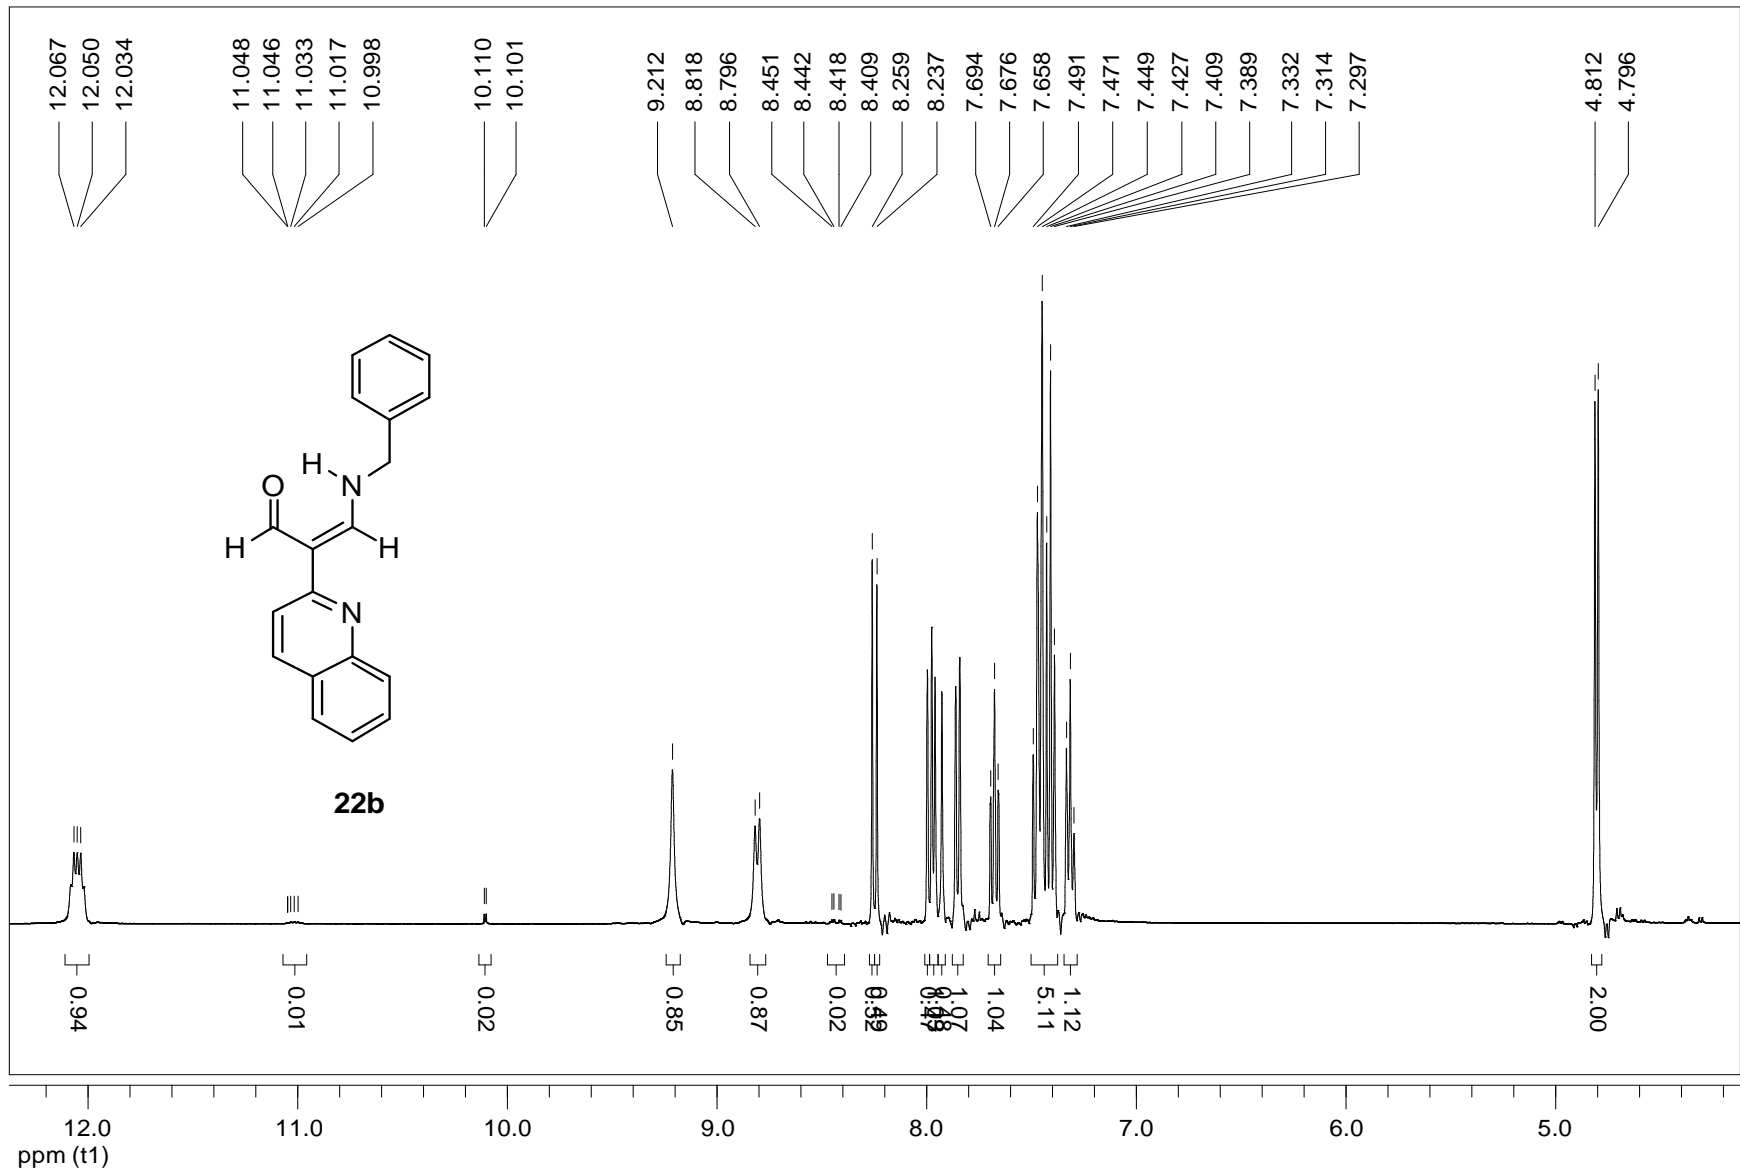

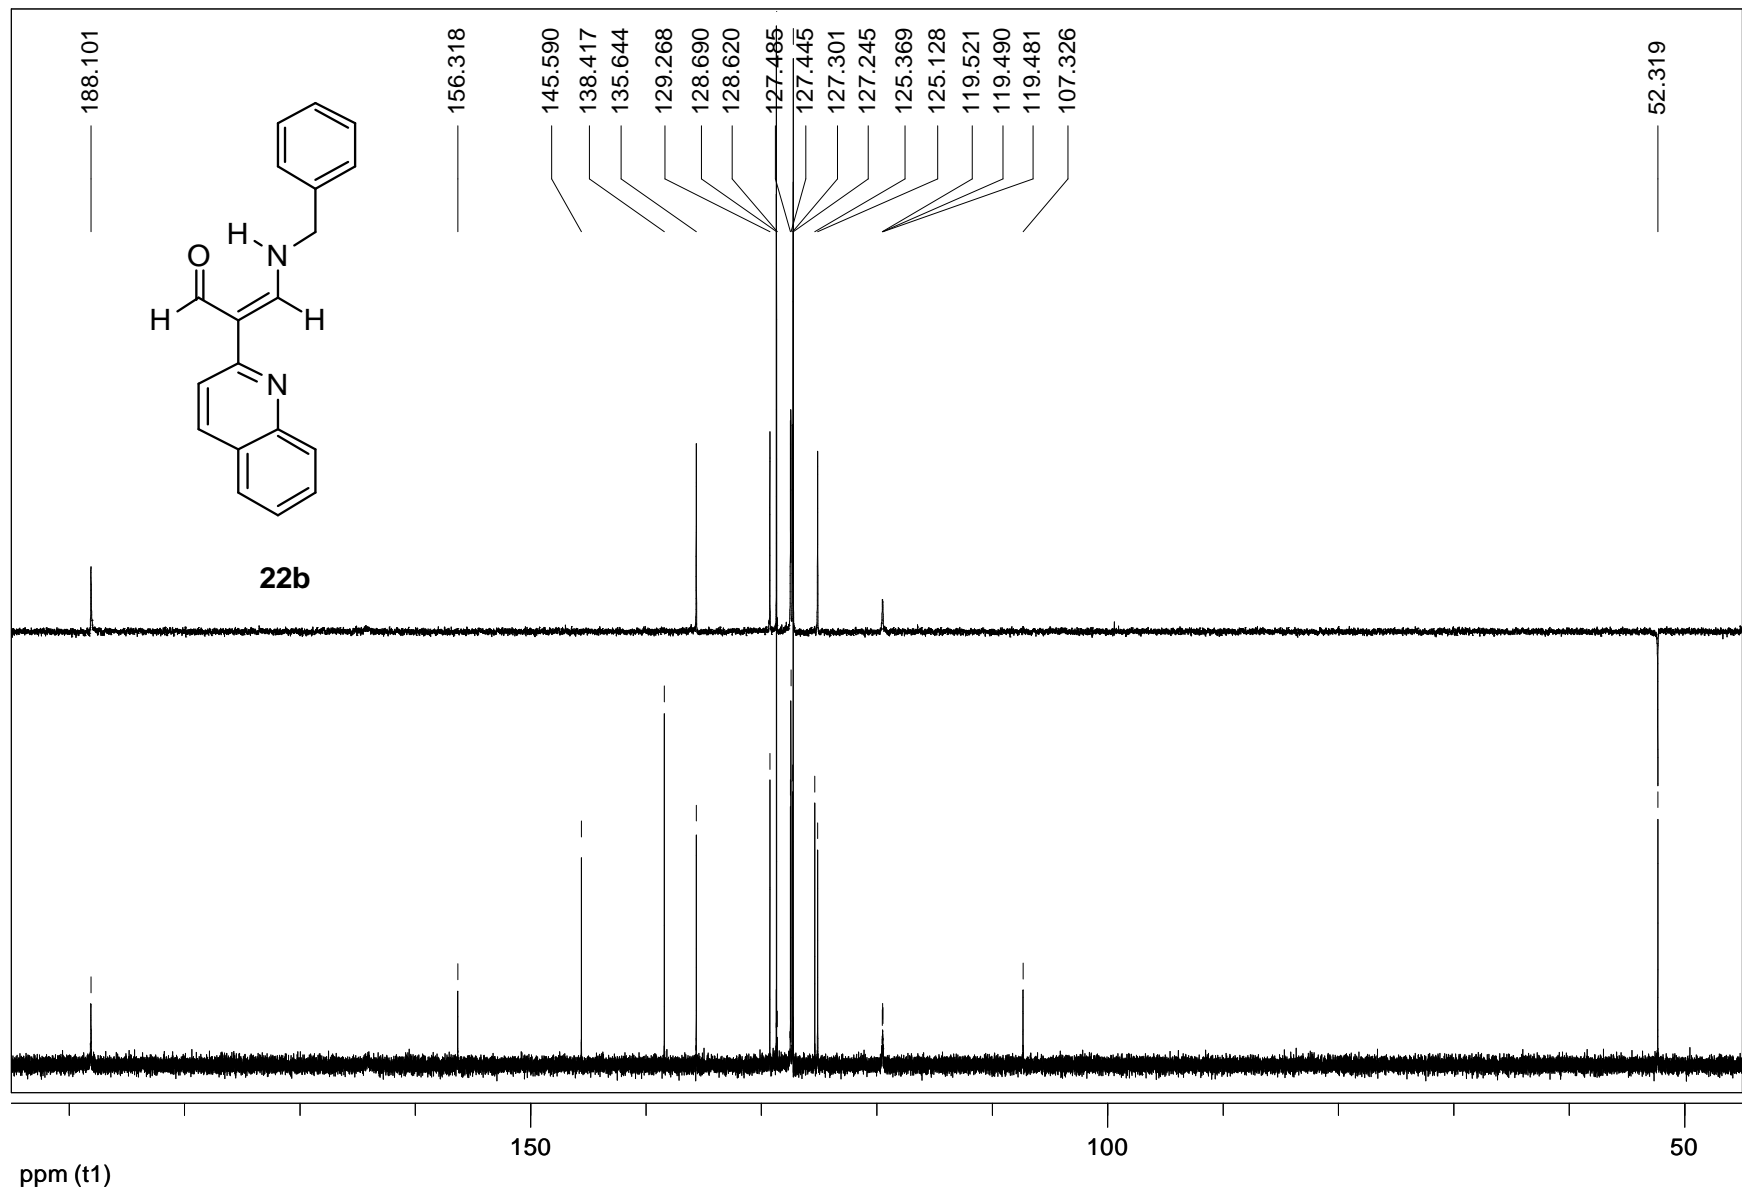



Compound 26:

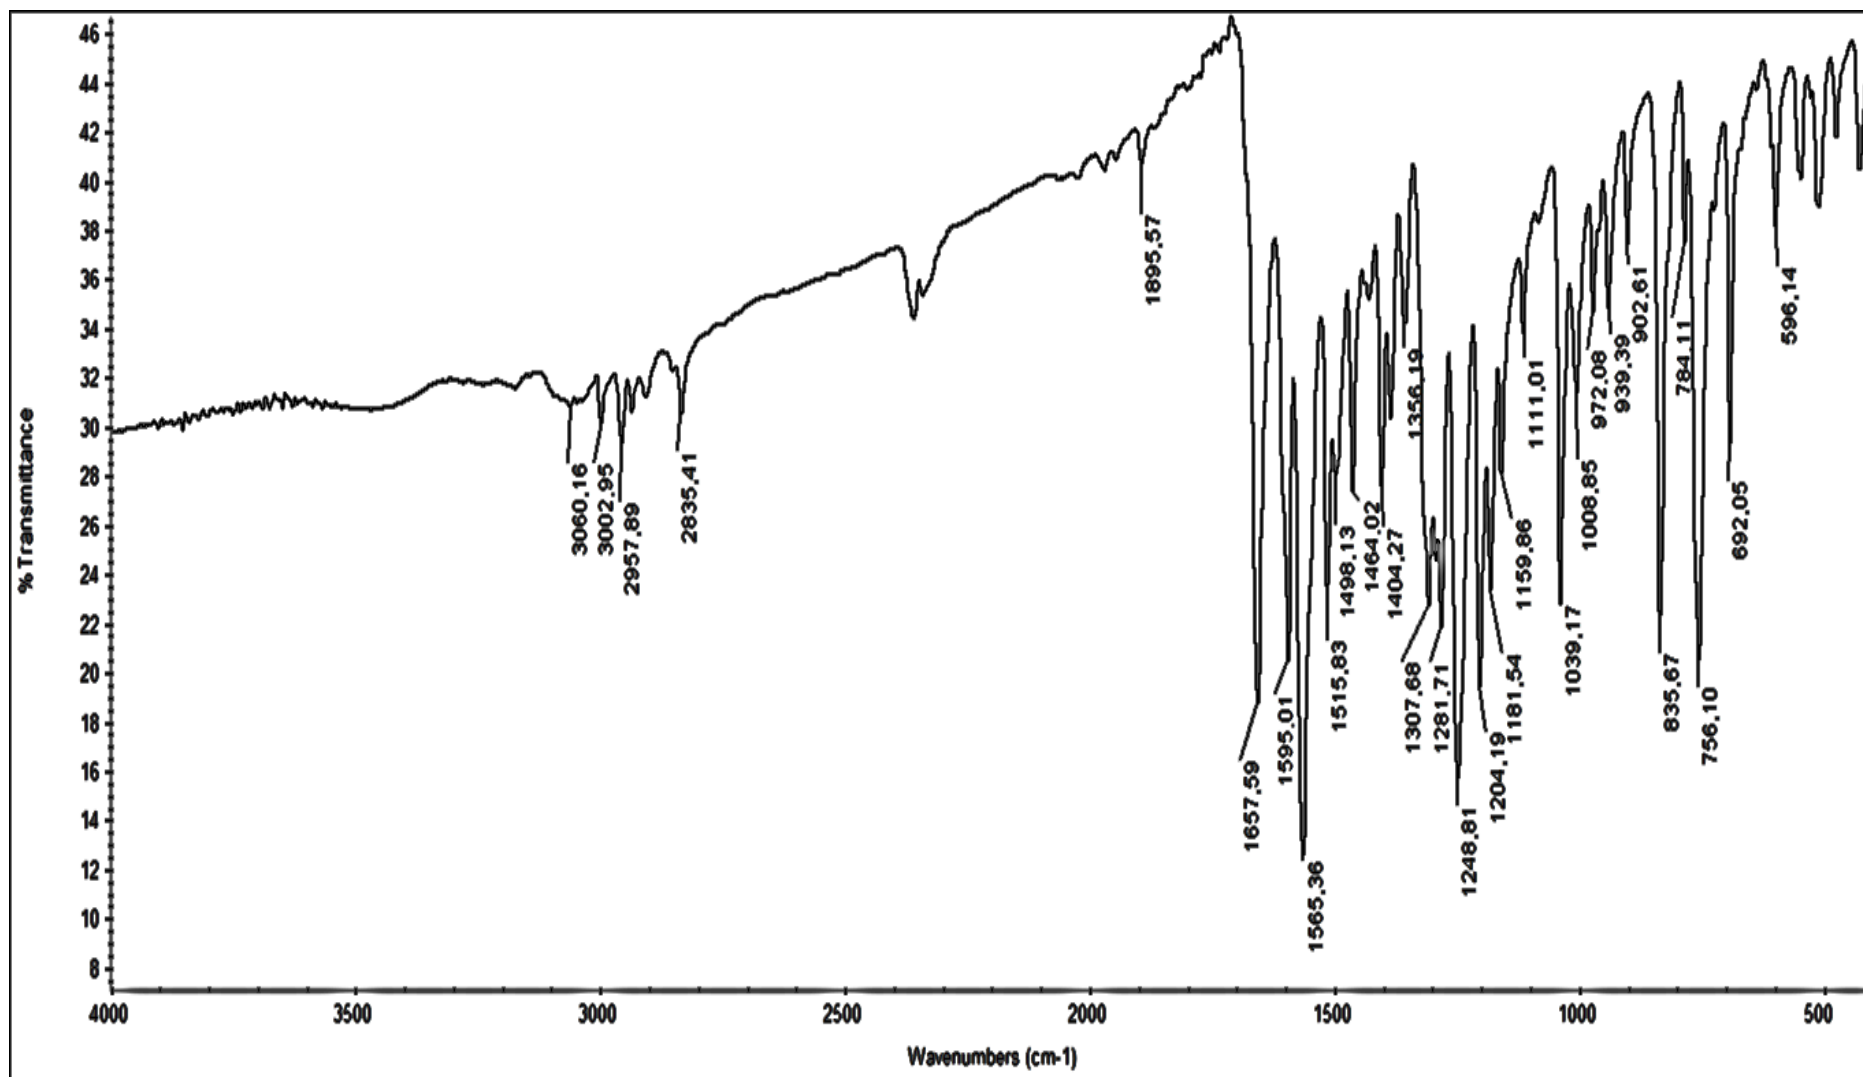

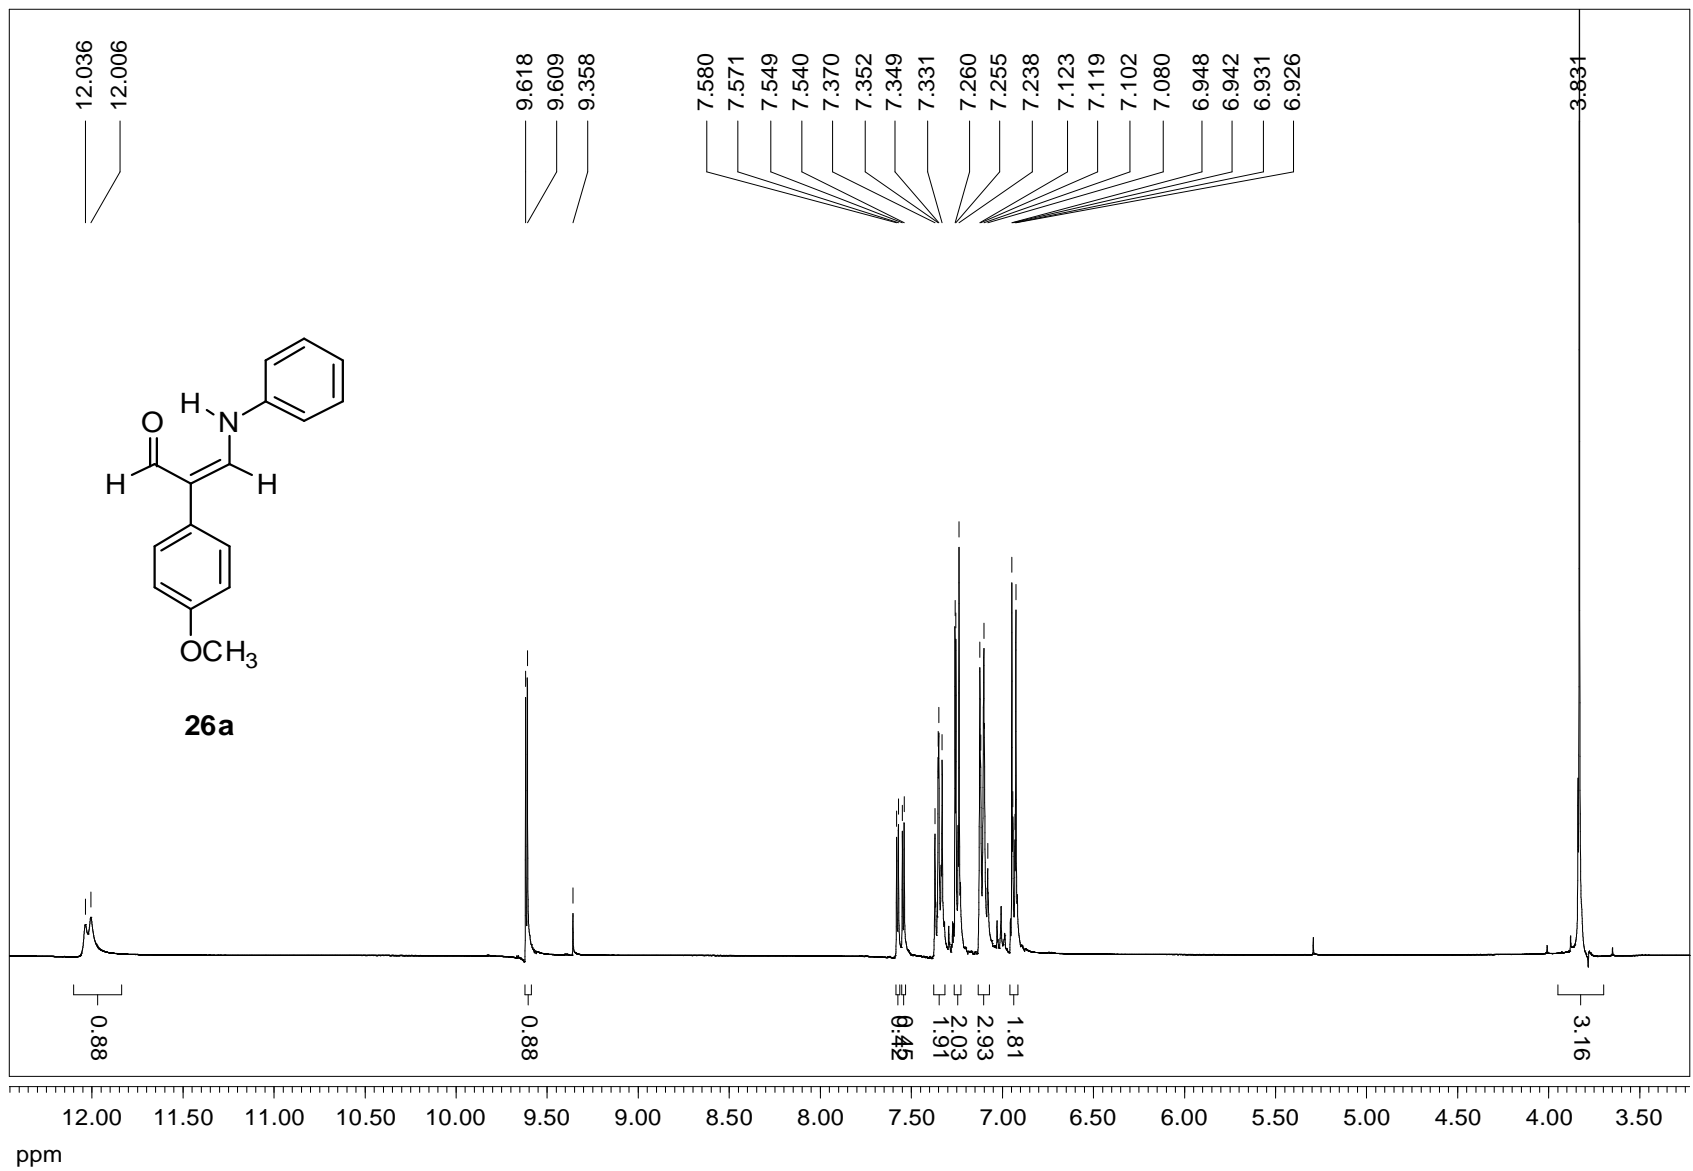

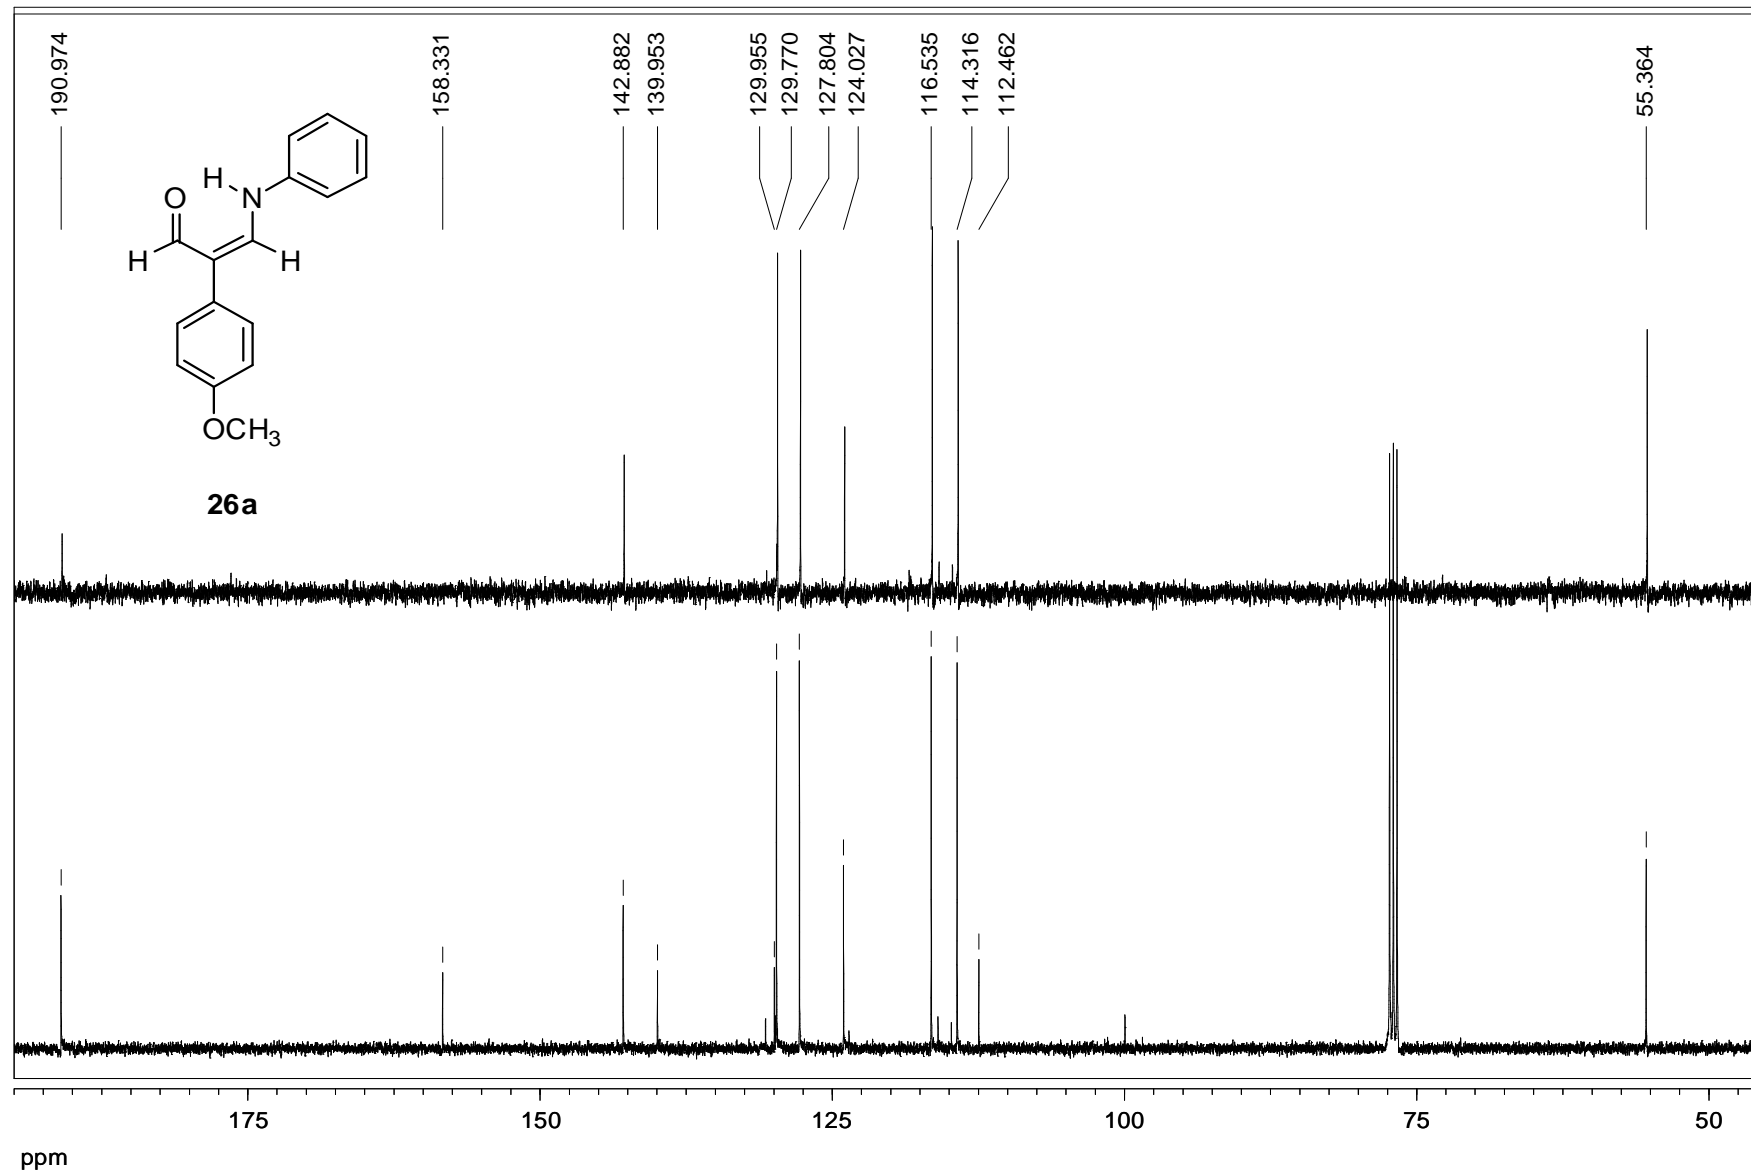

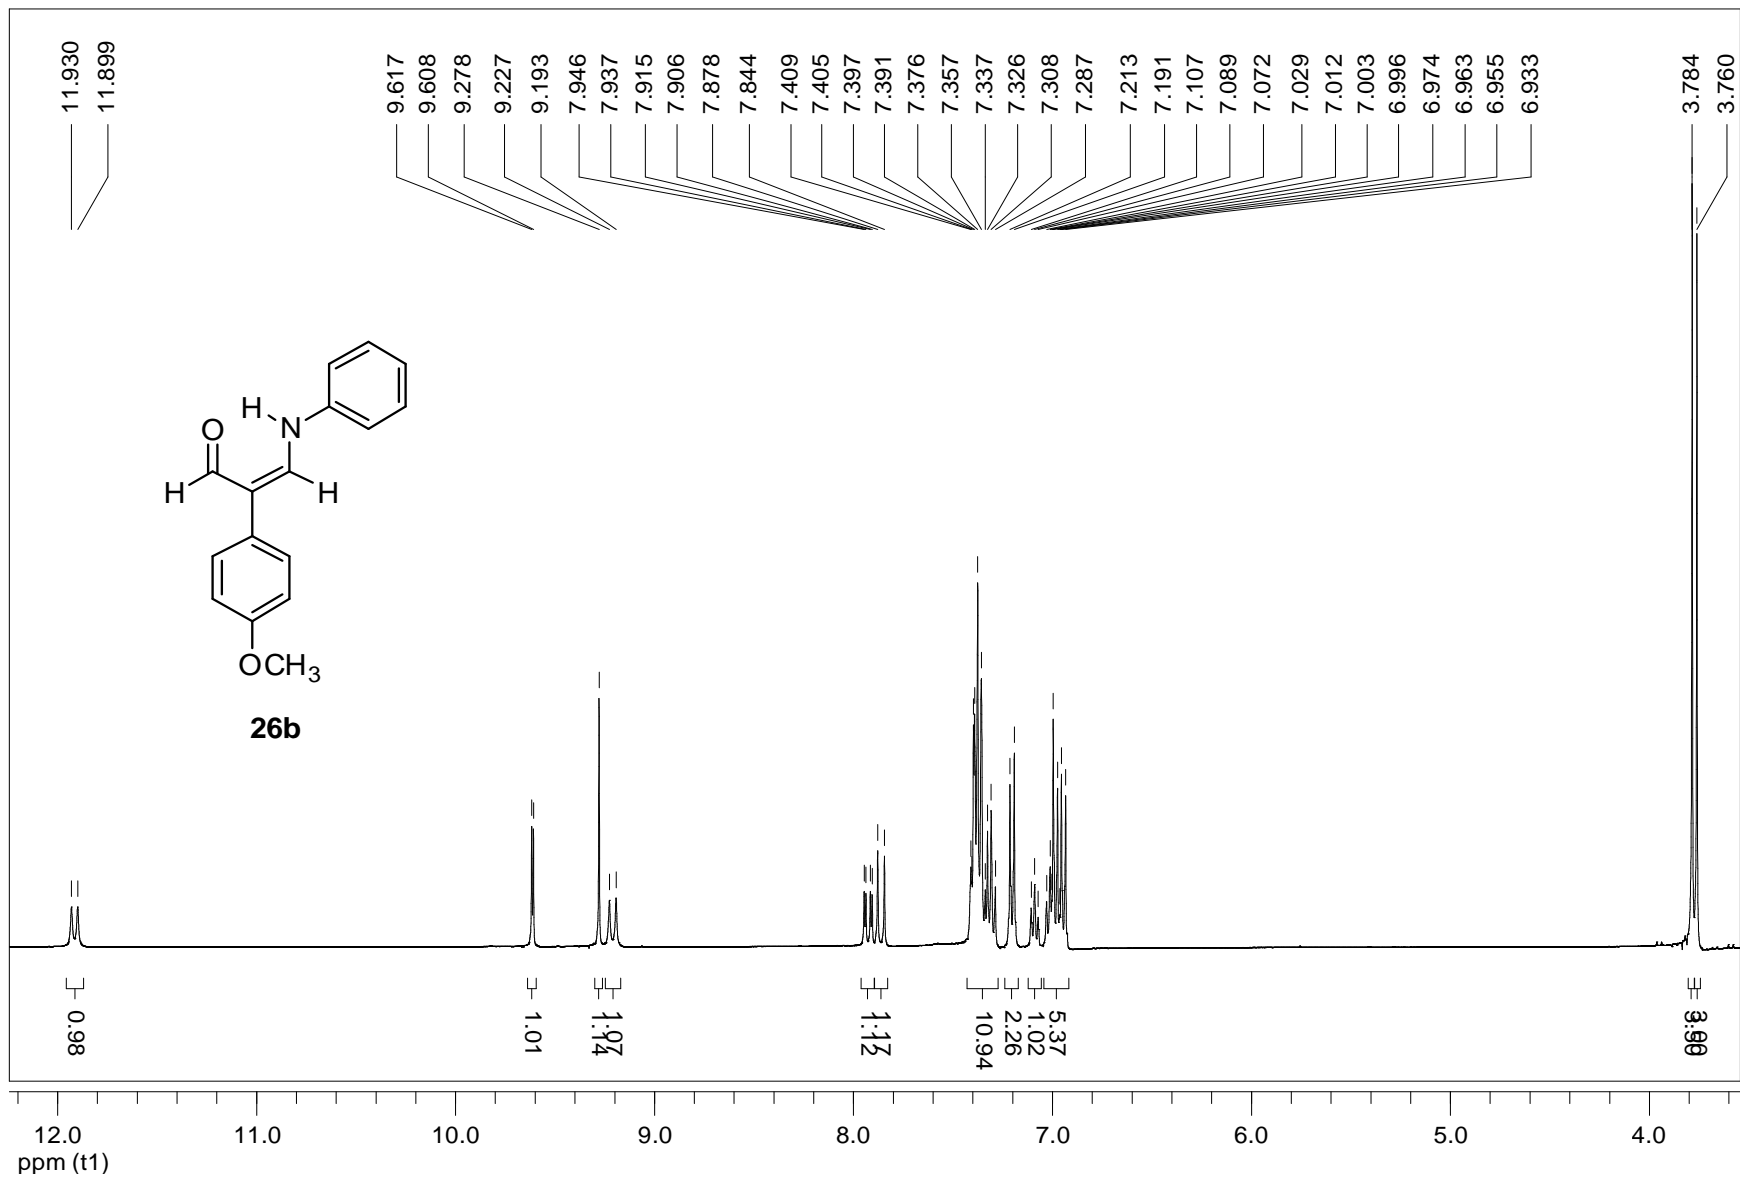

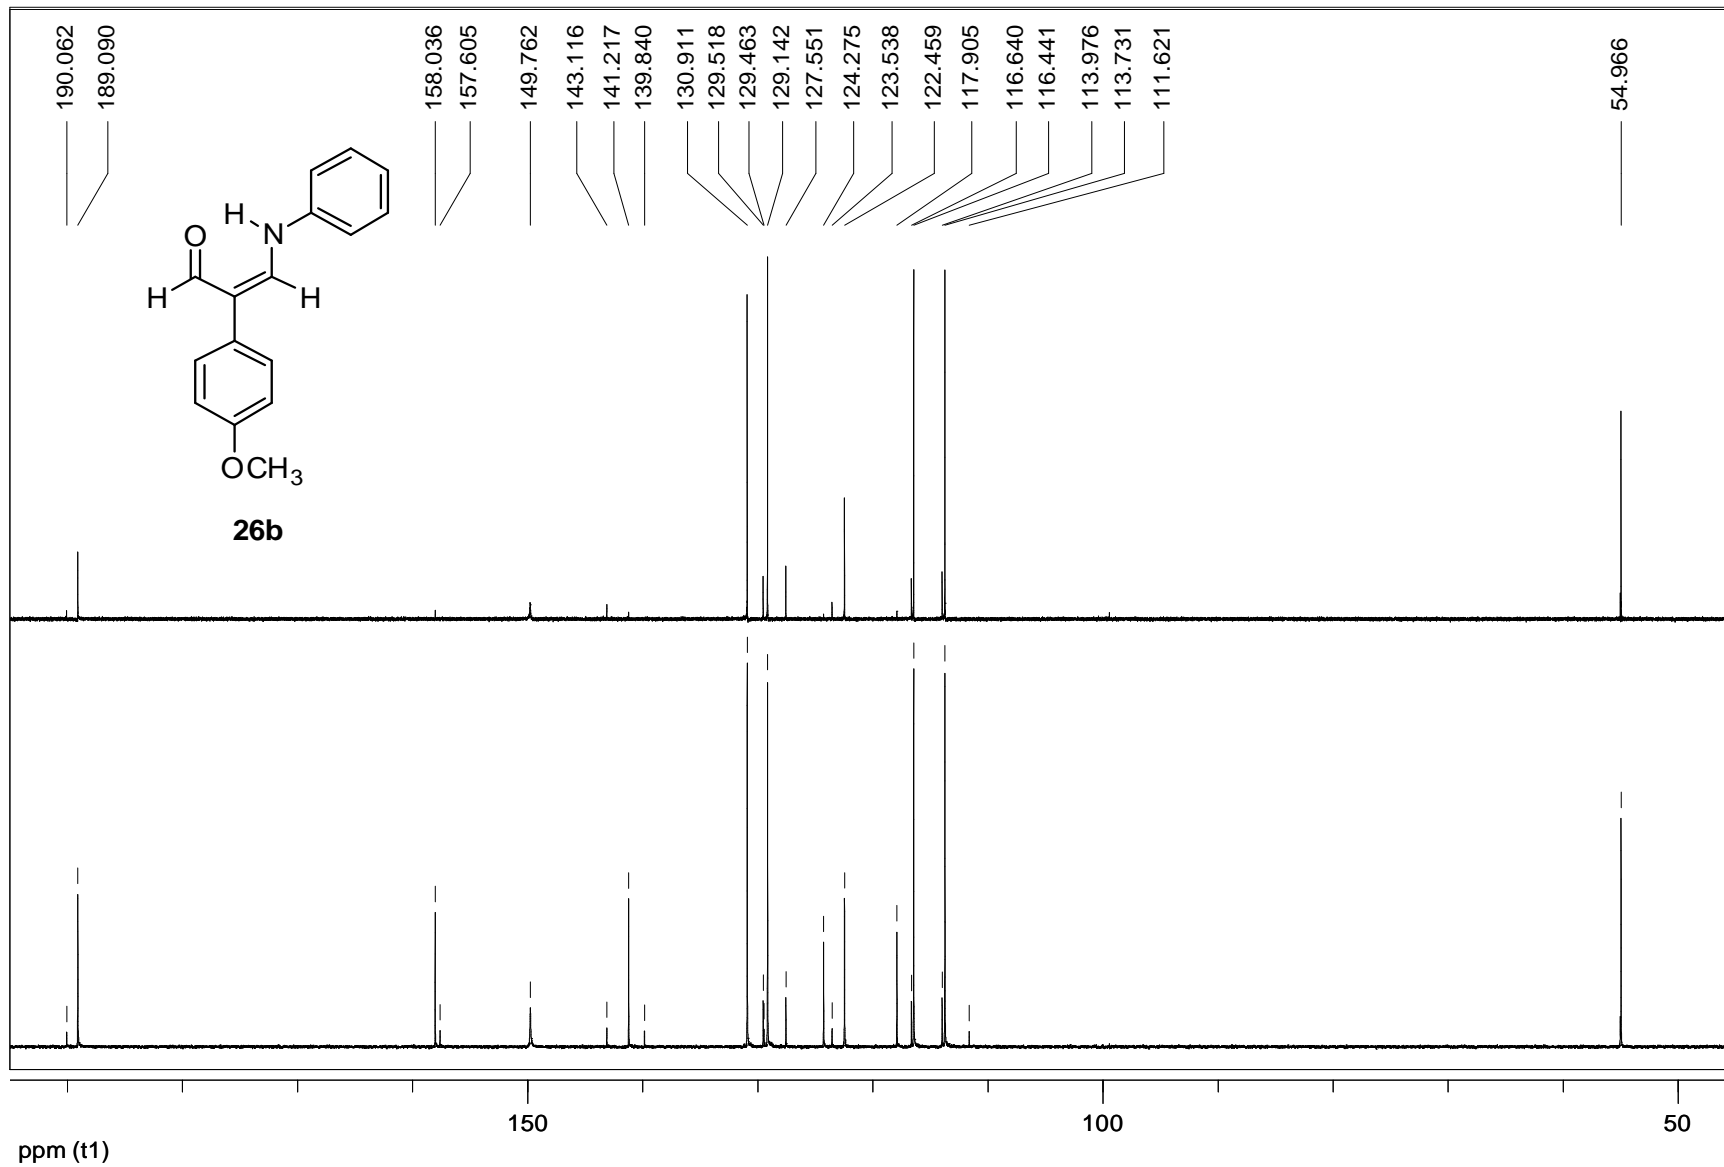

Compound 27:

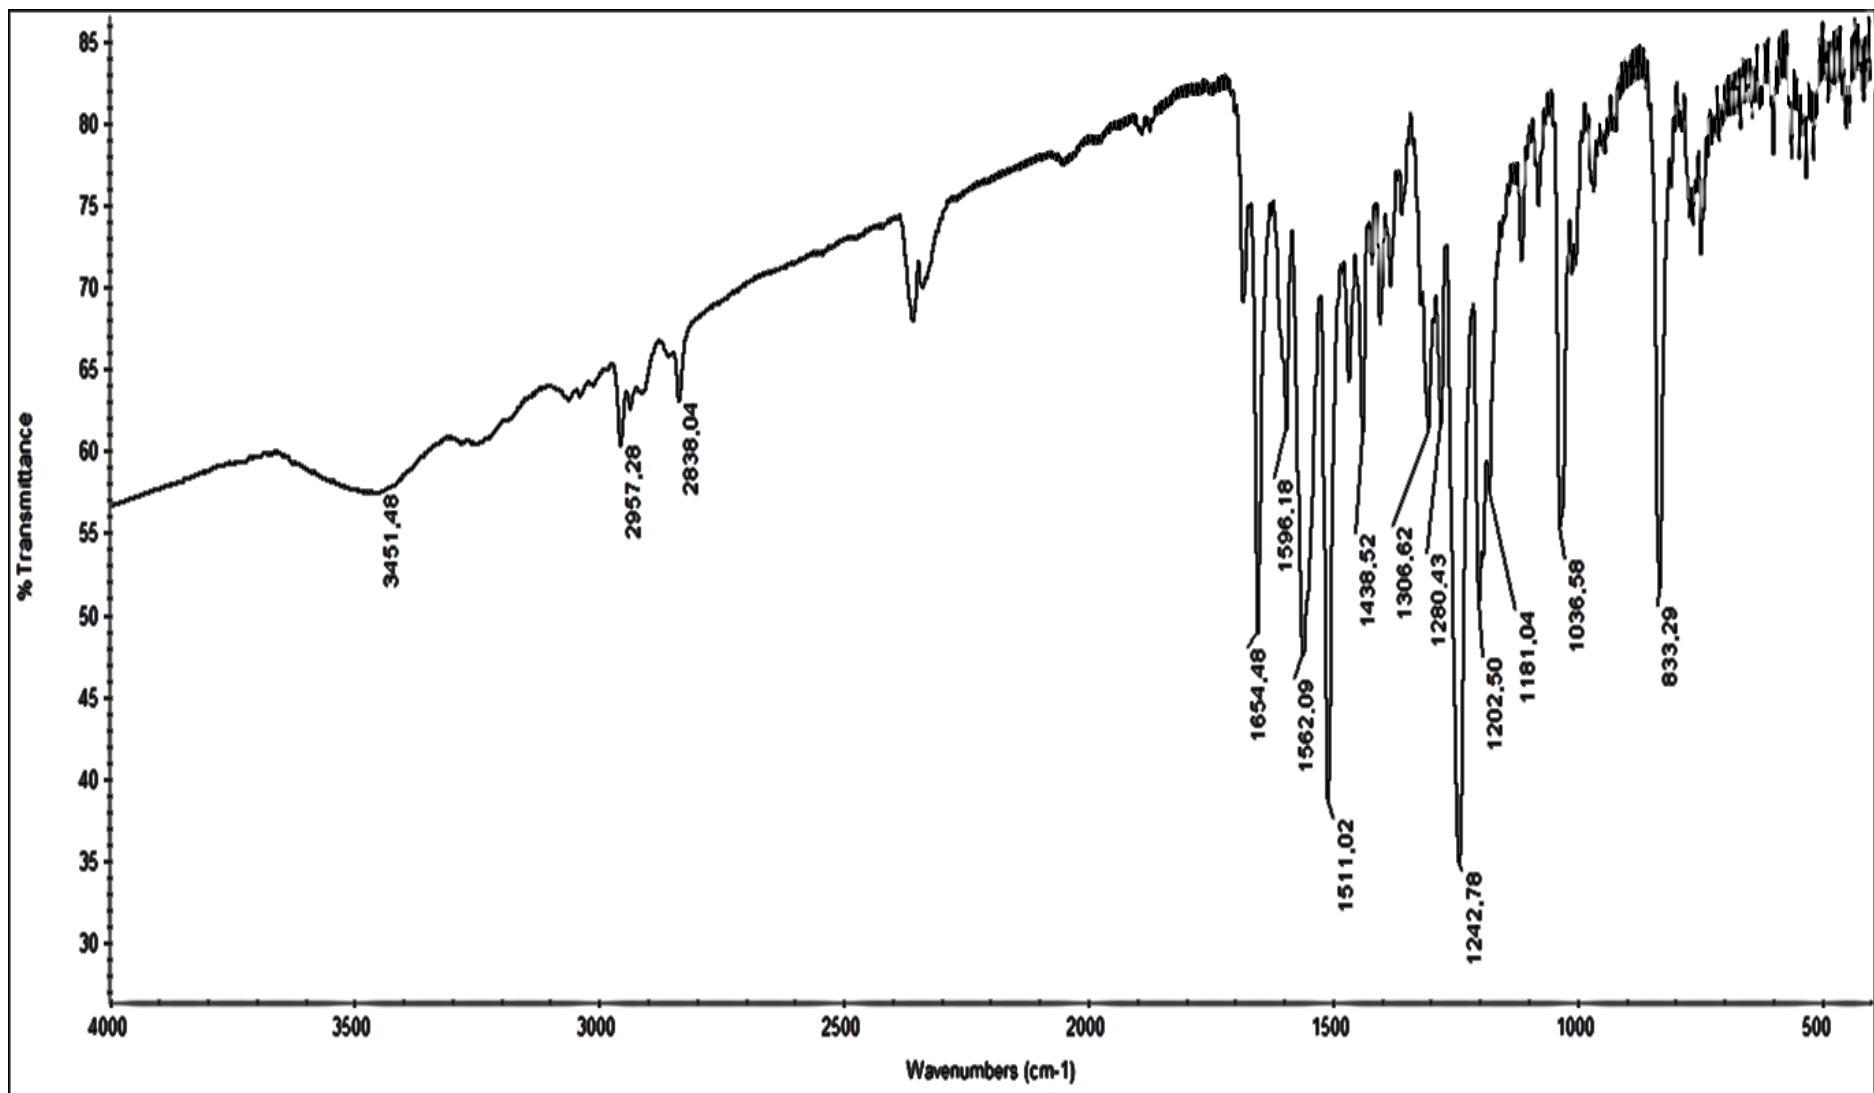

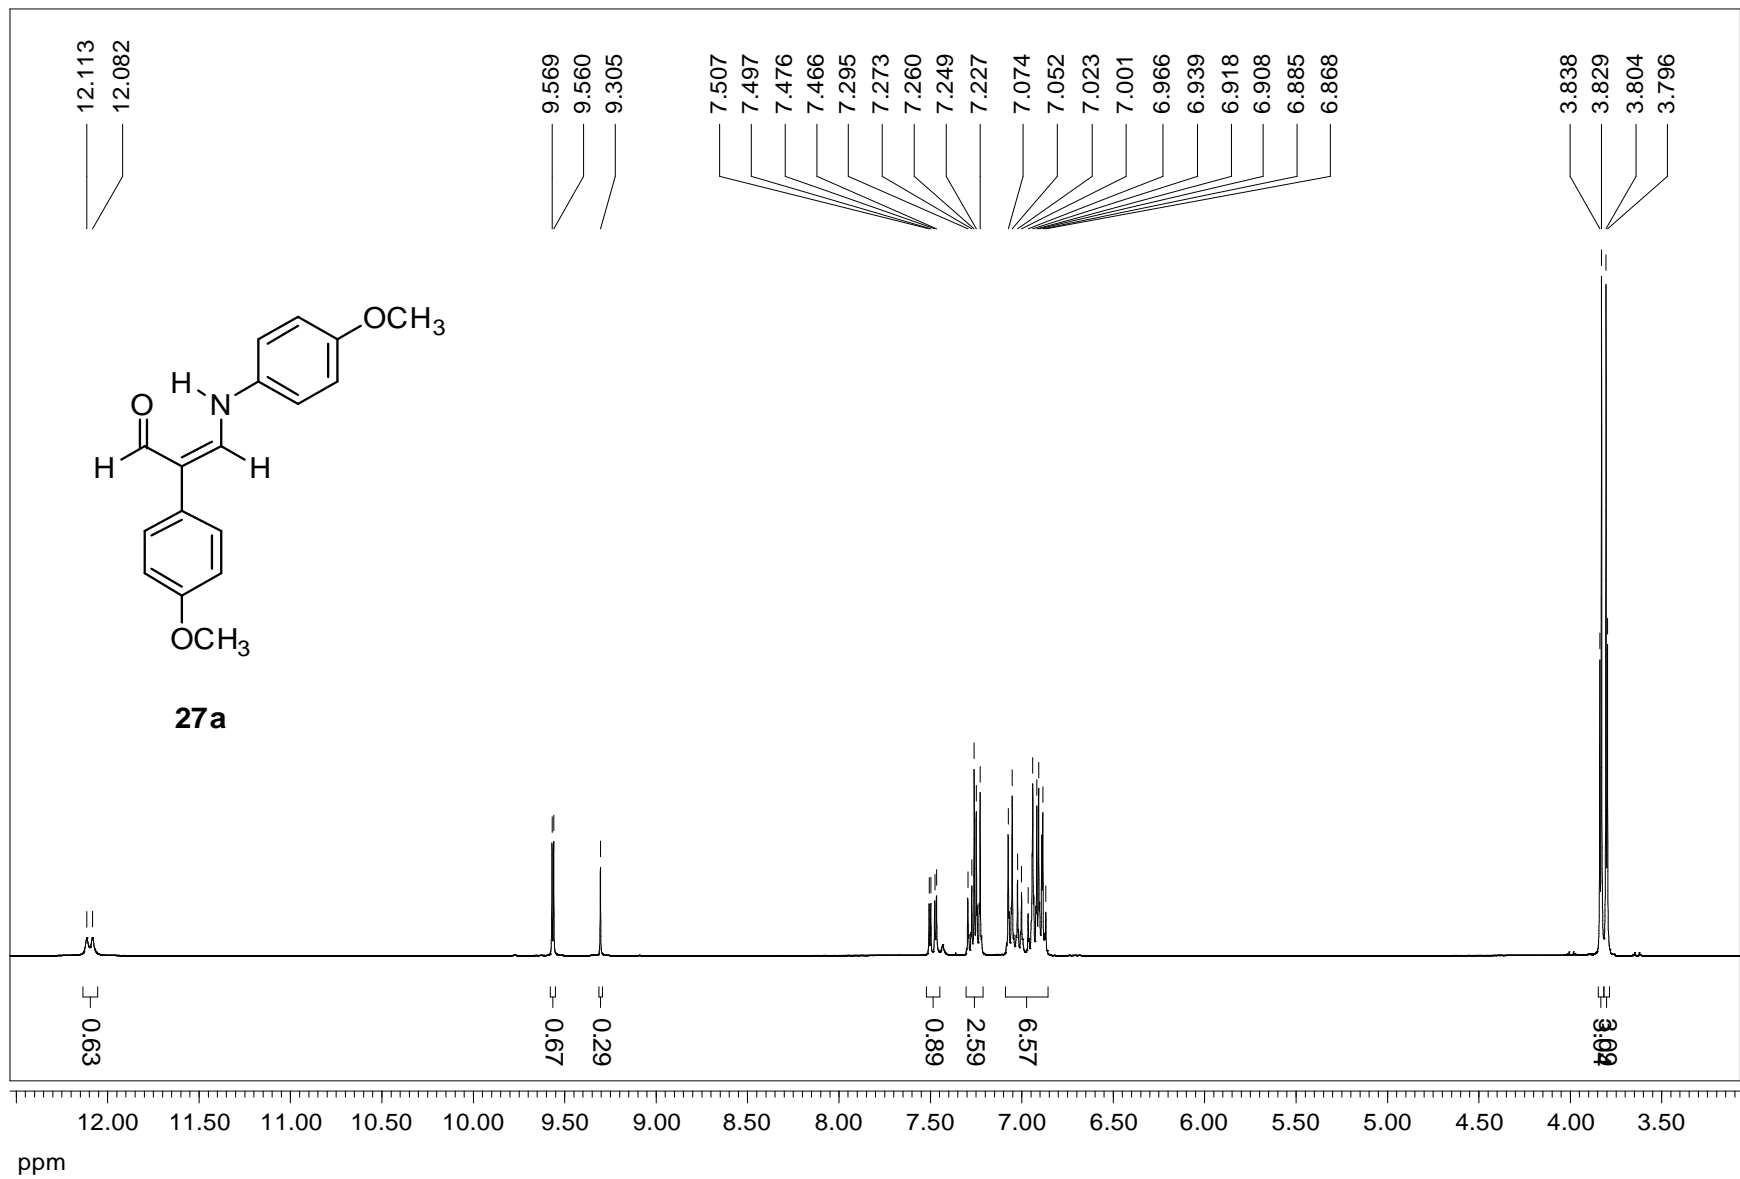

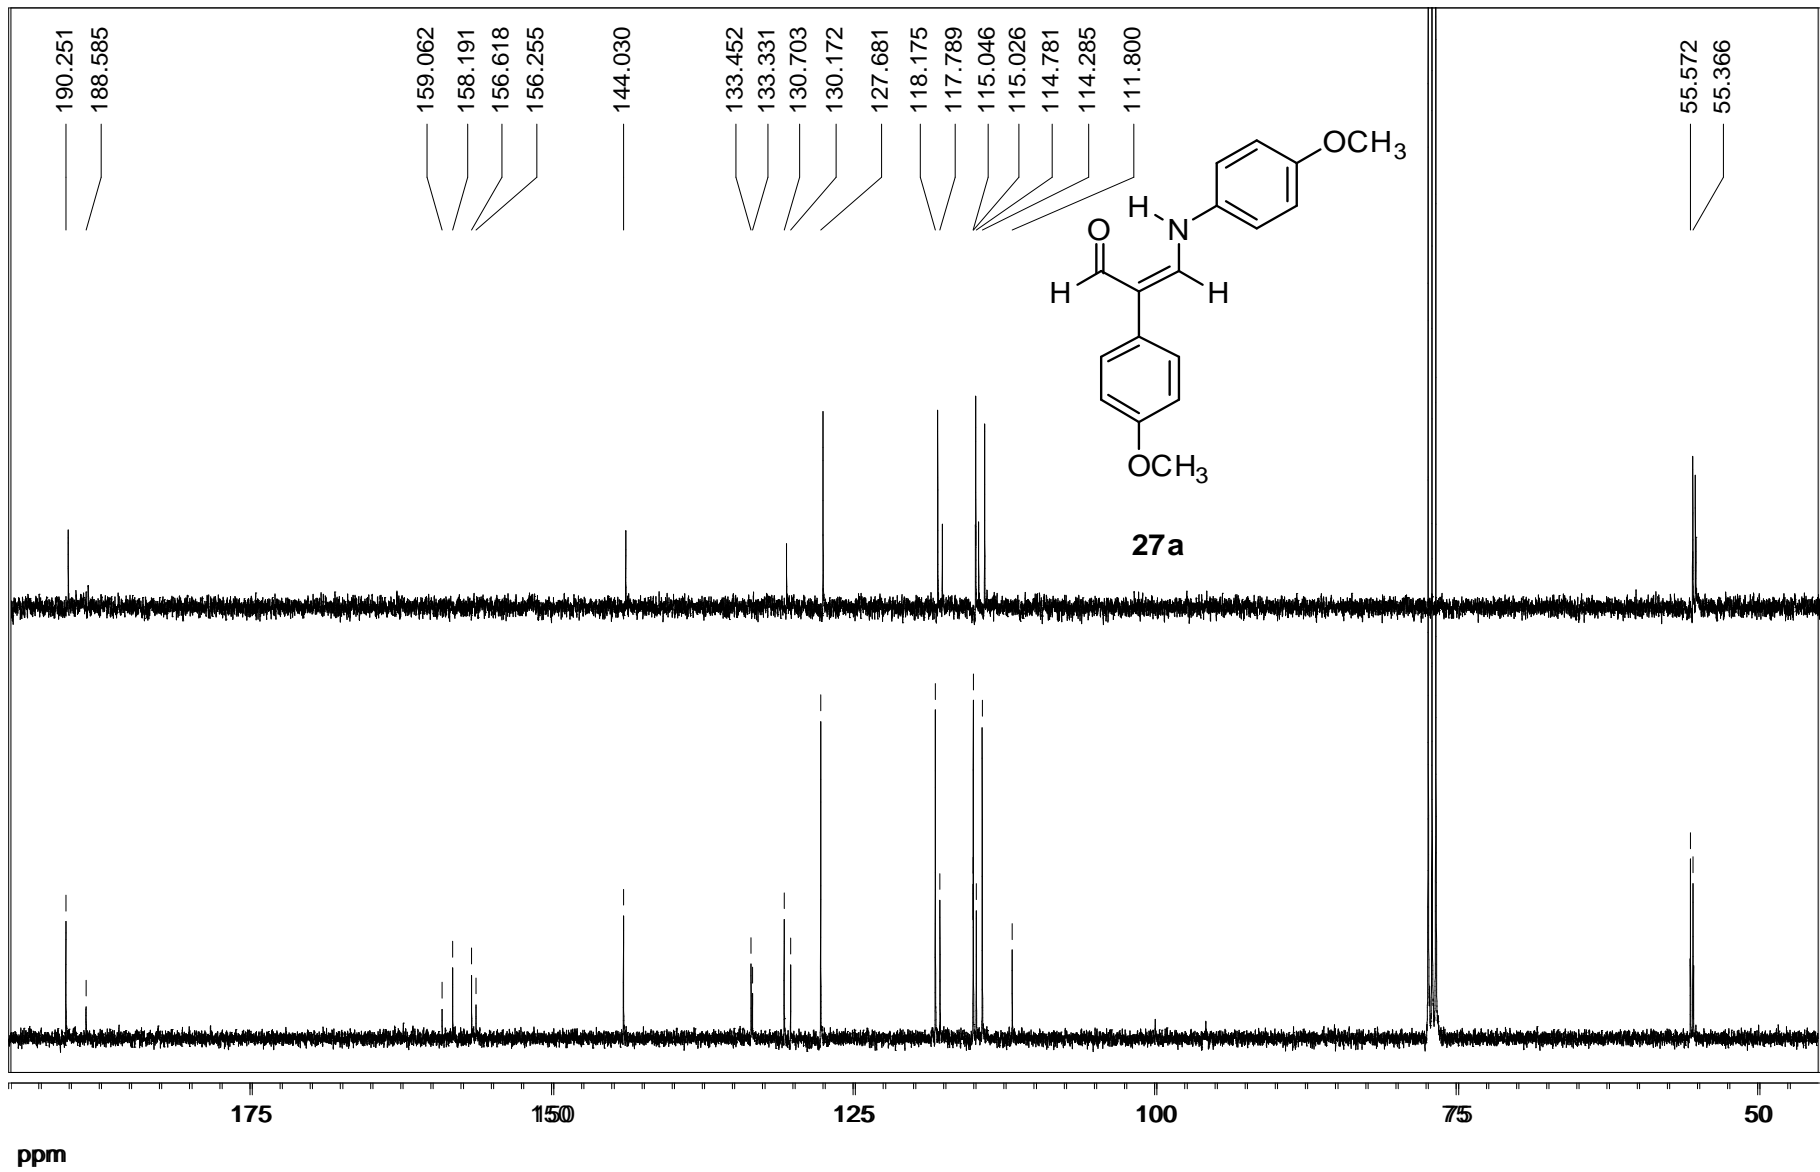



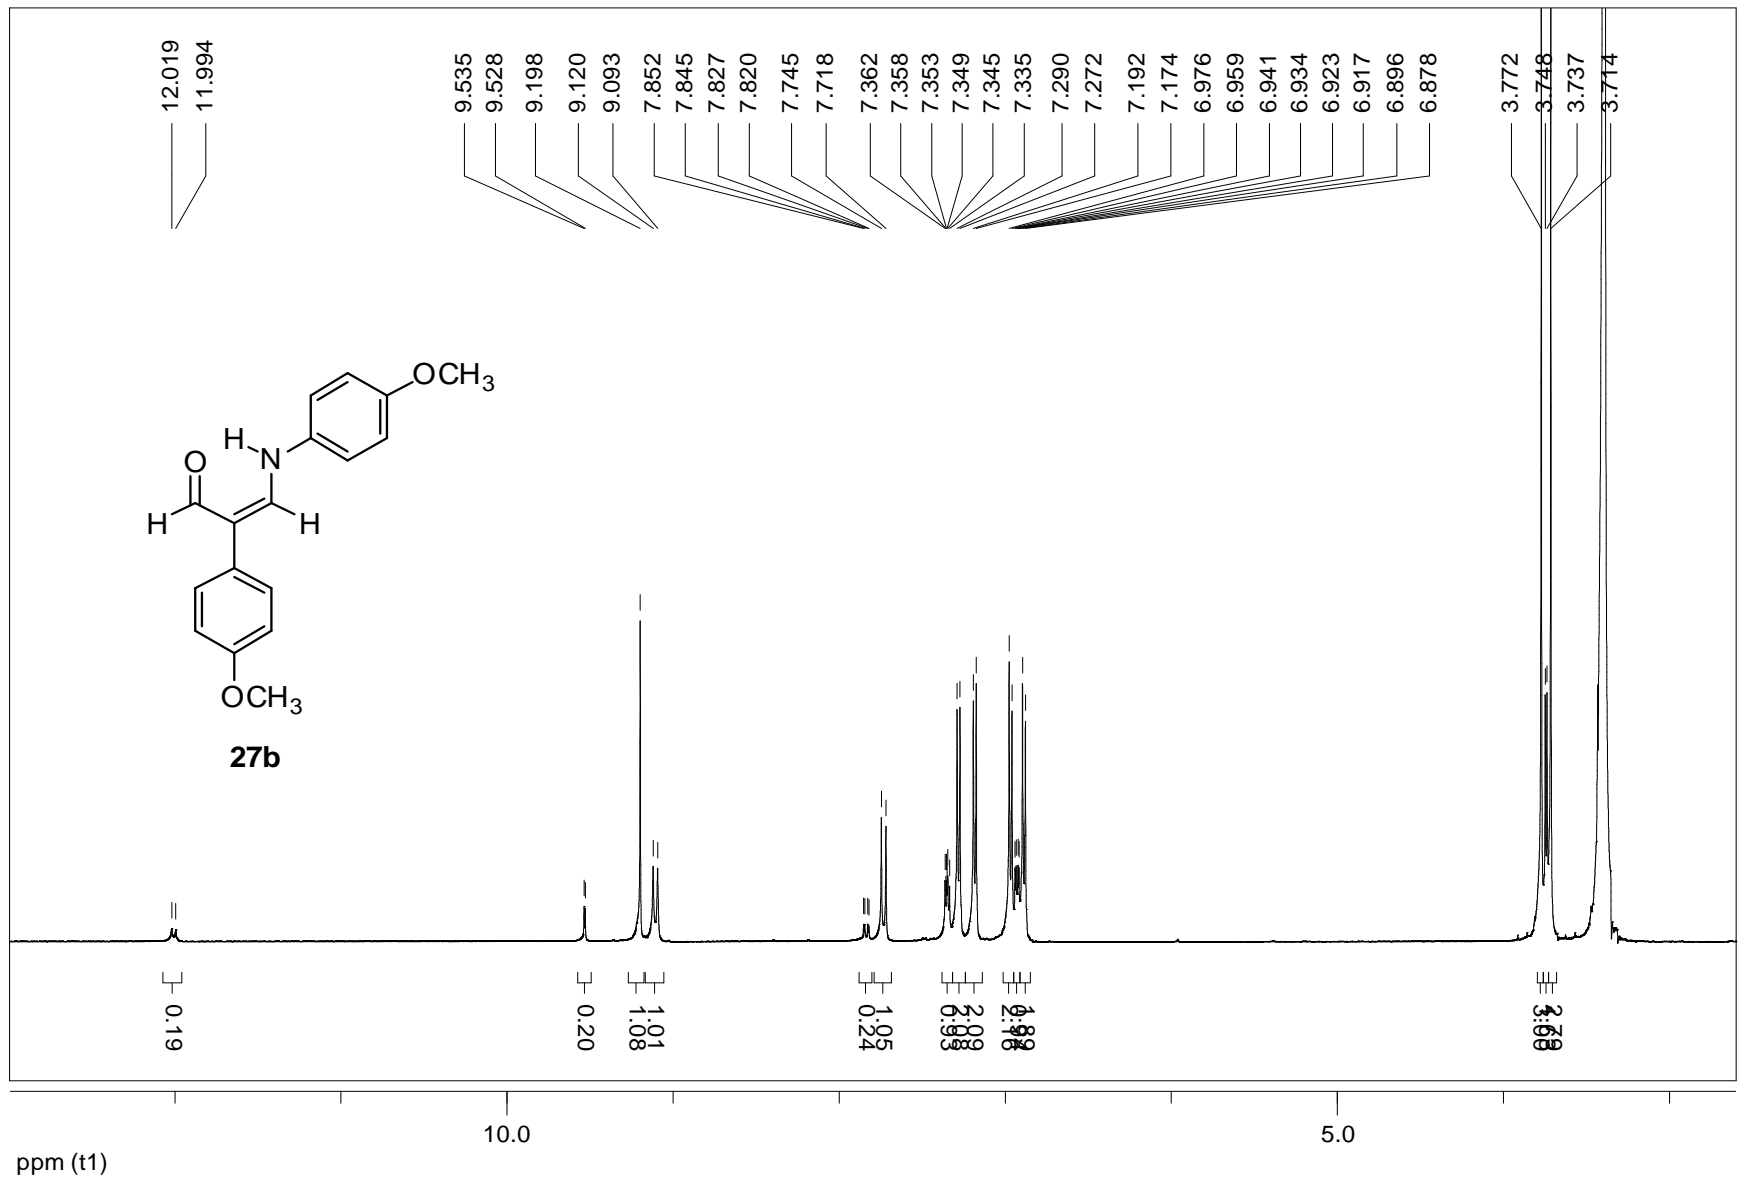

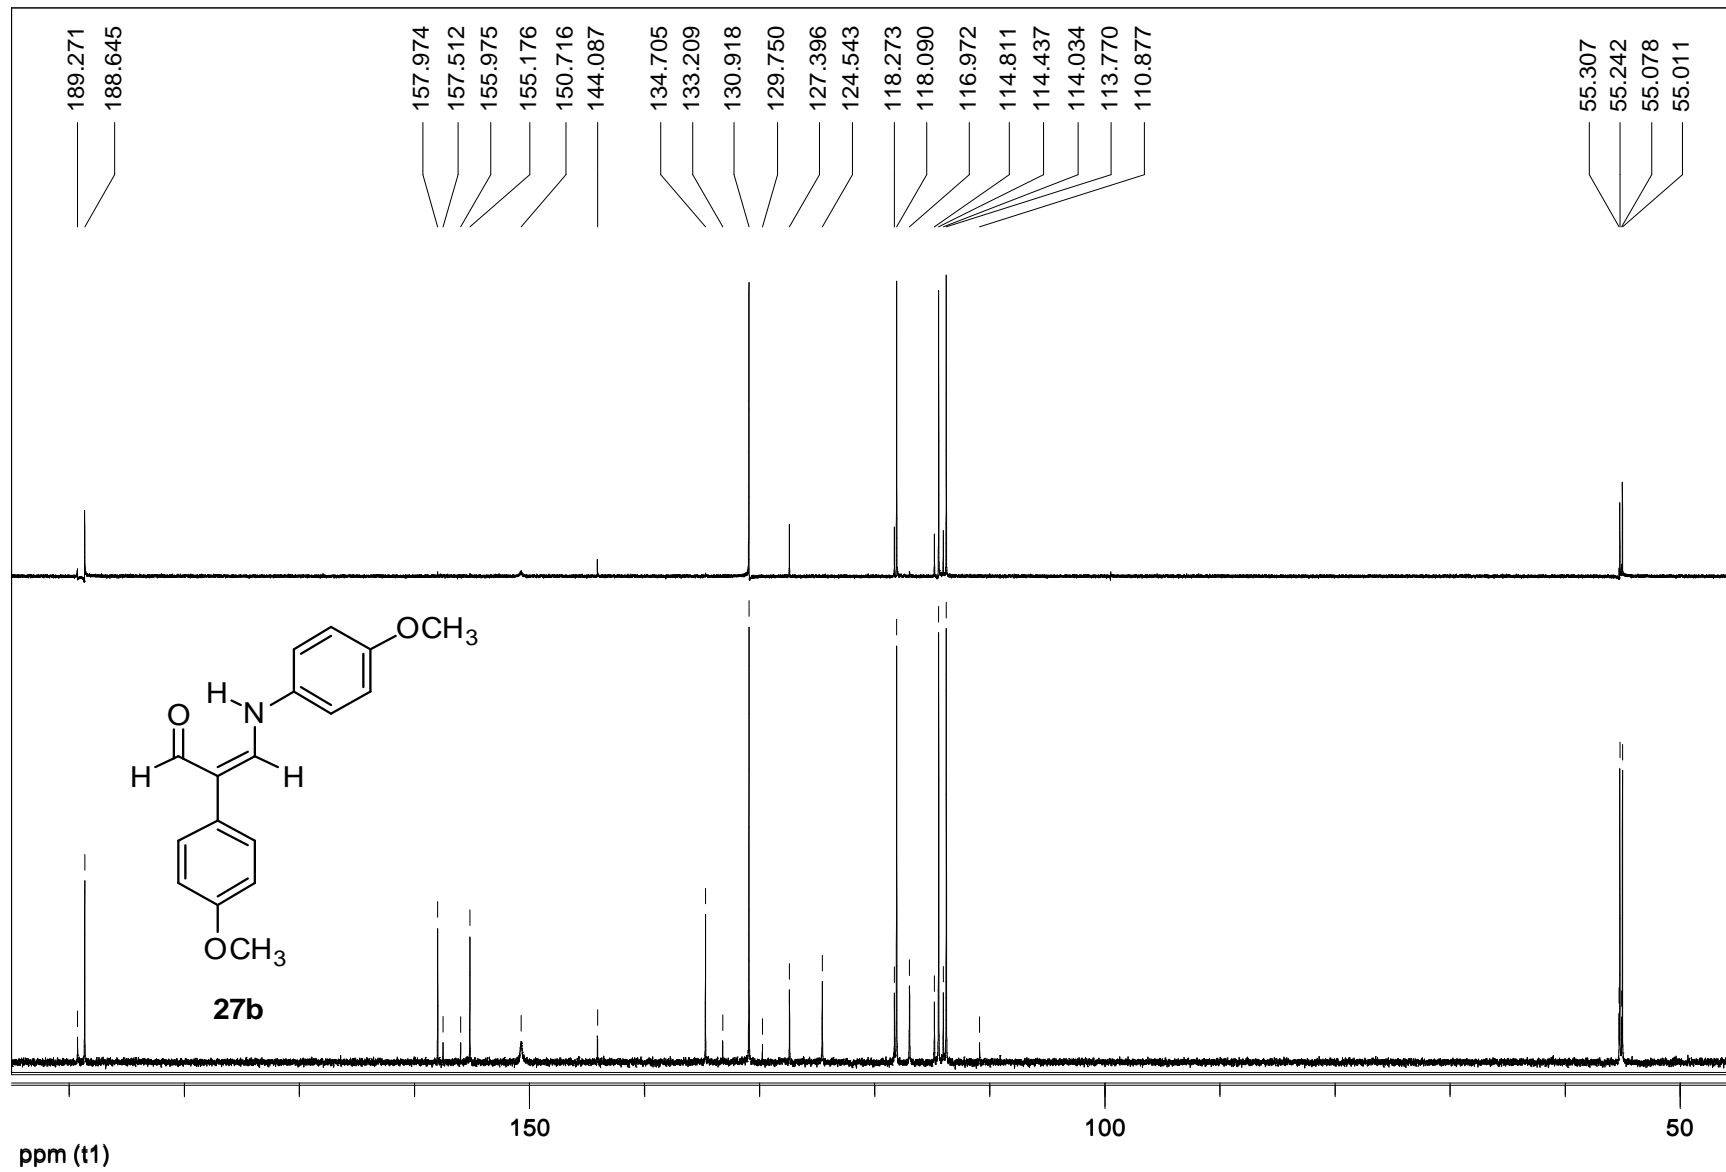

Compound 28:

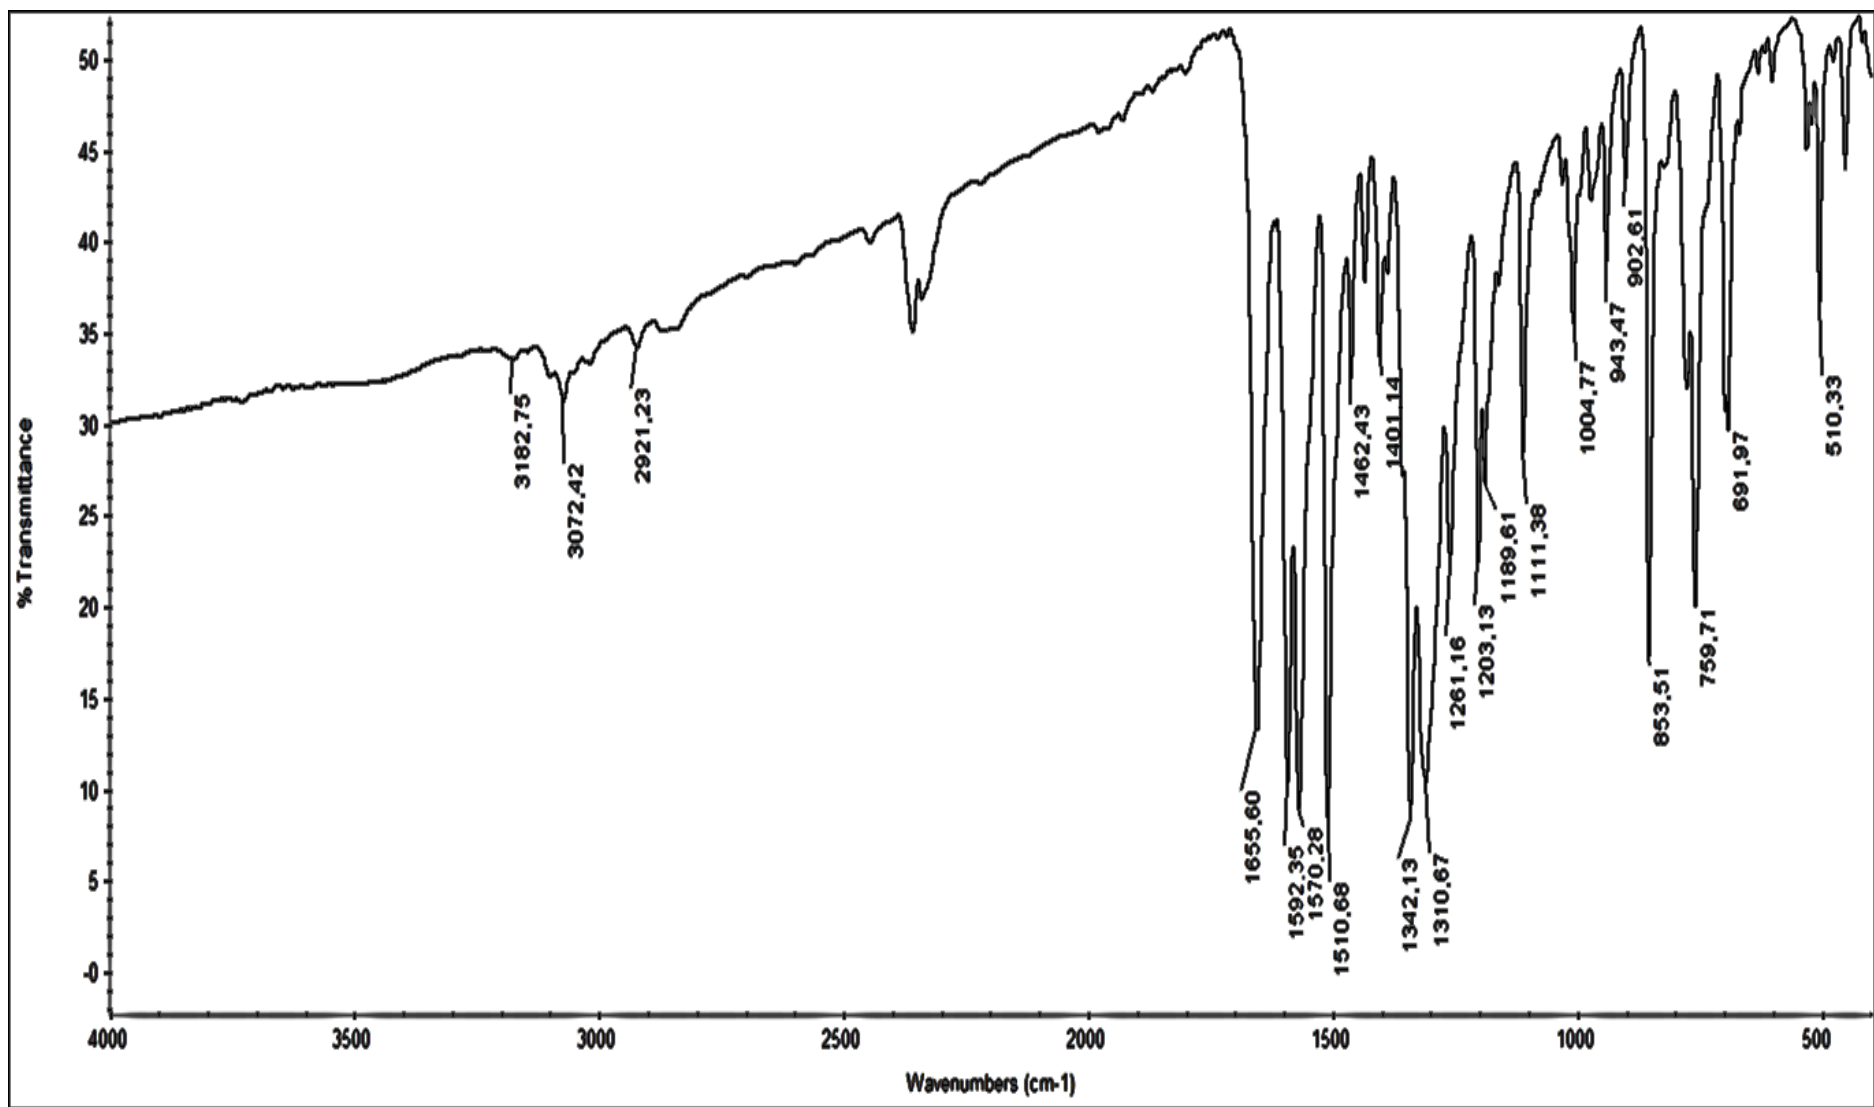

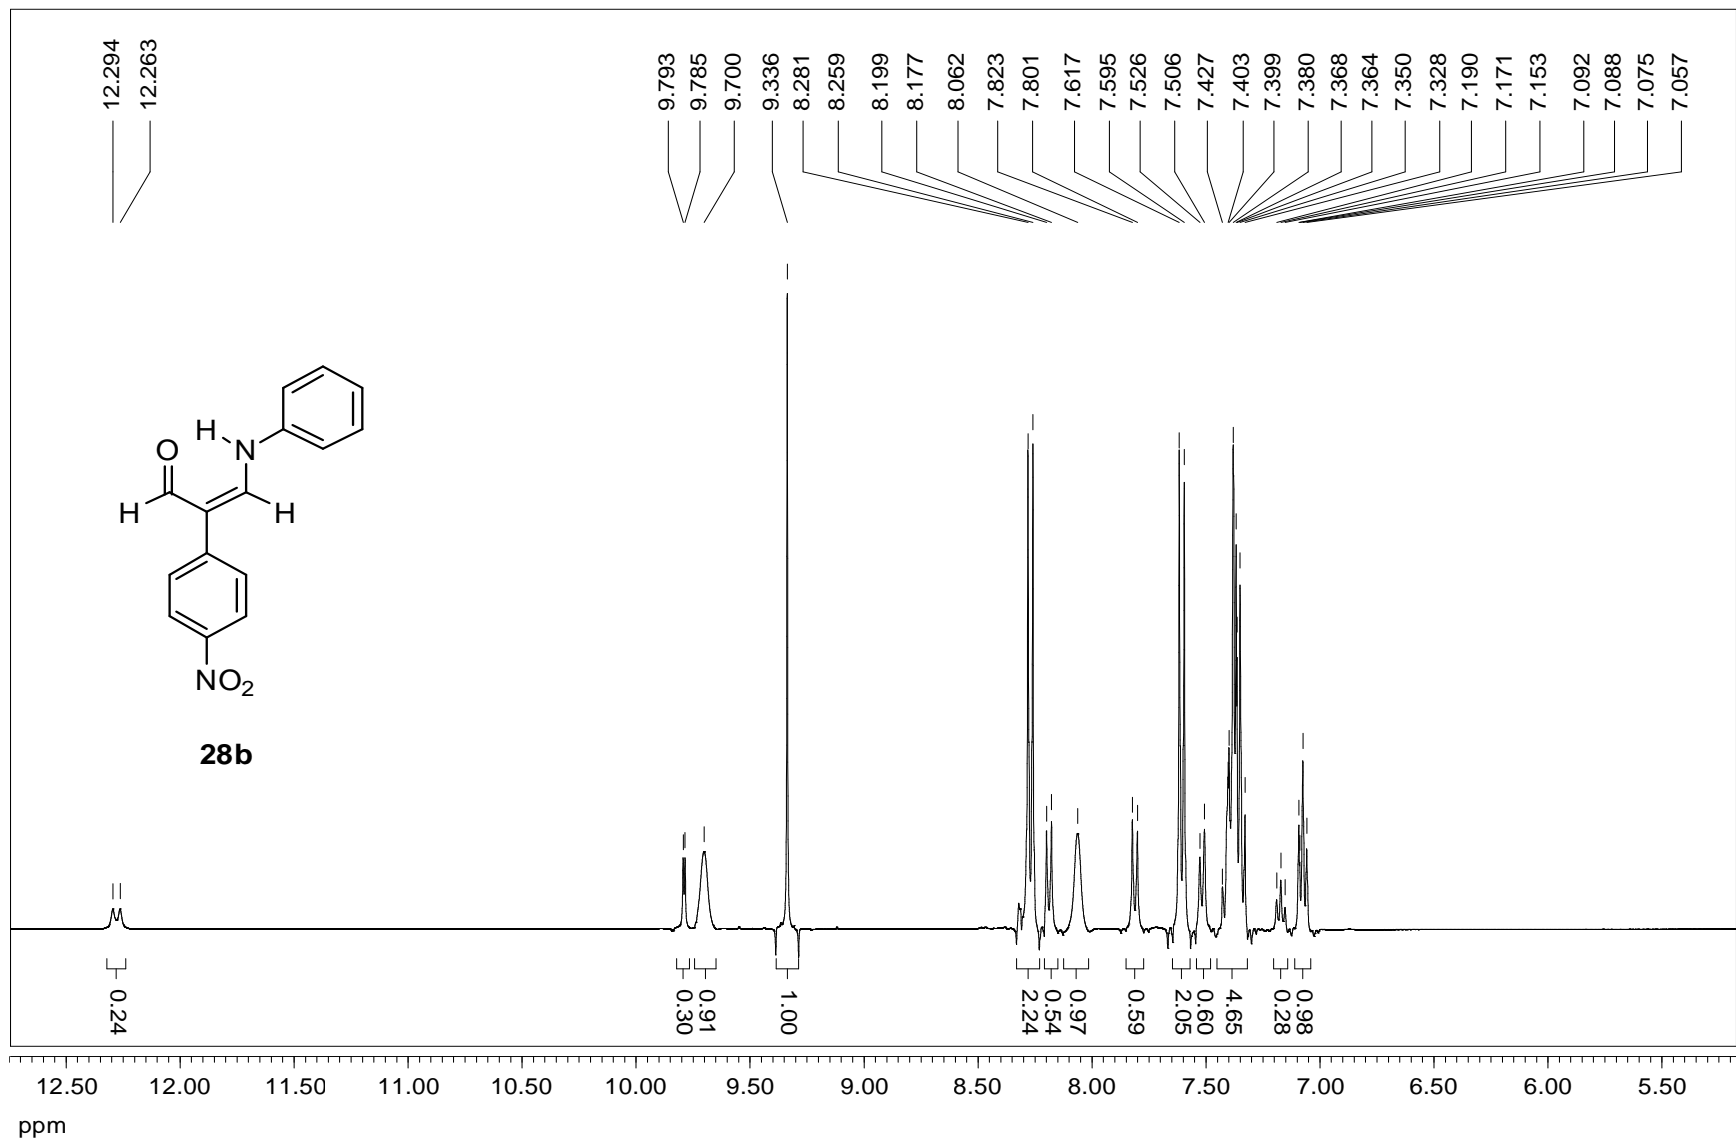

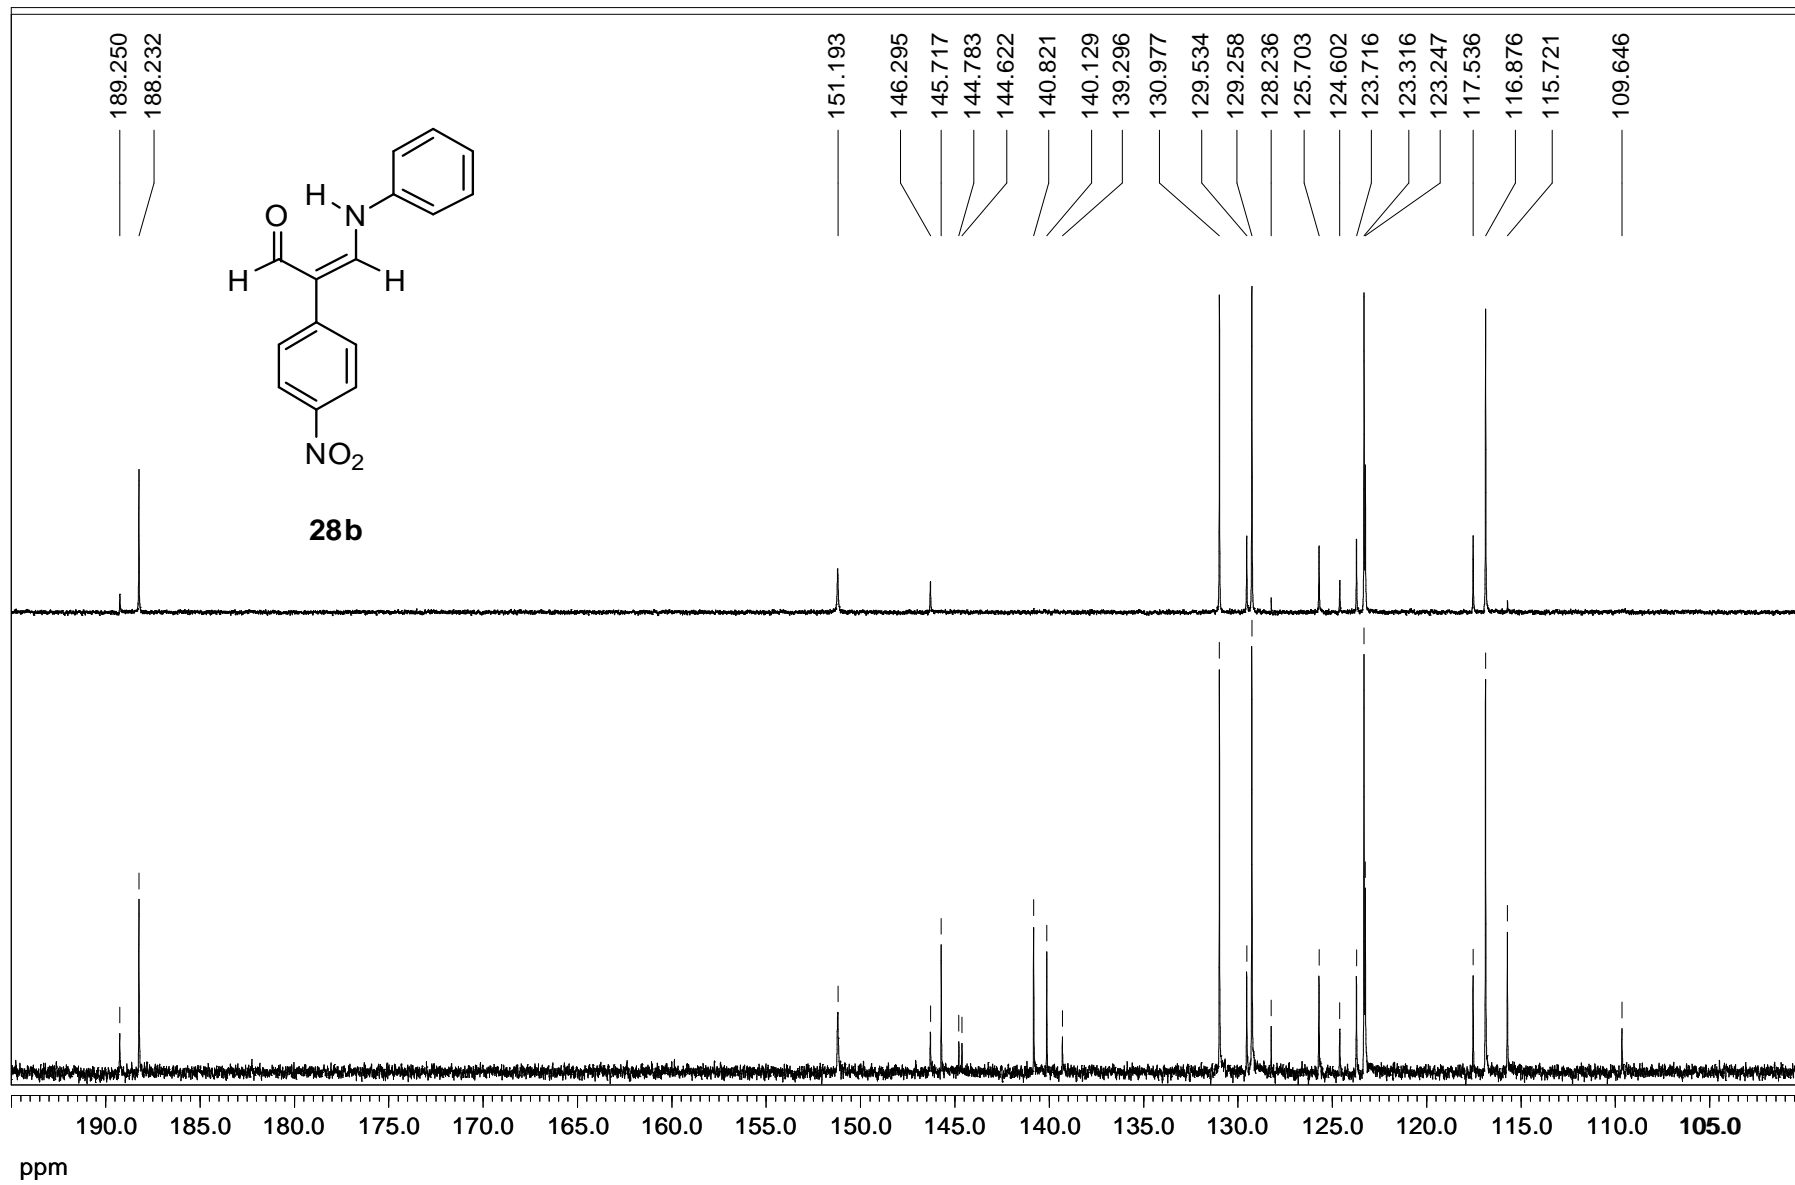

Compound 29:

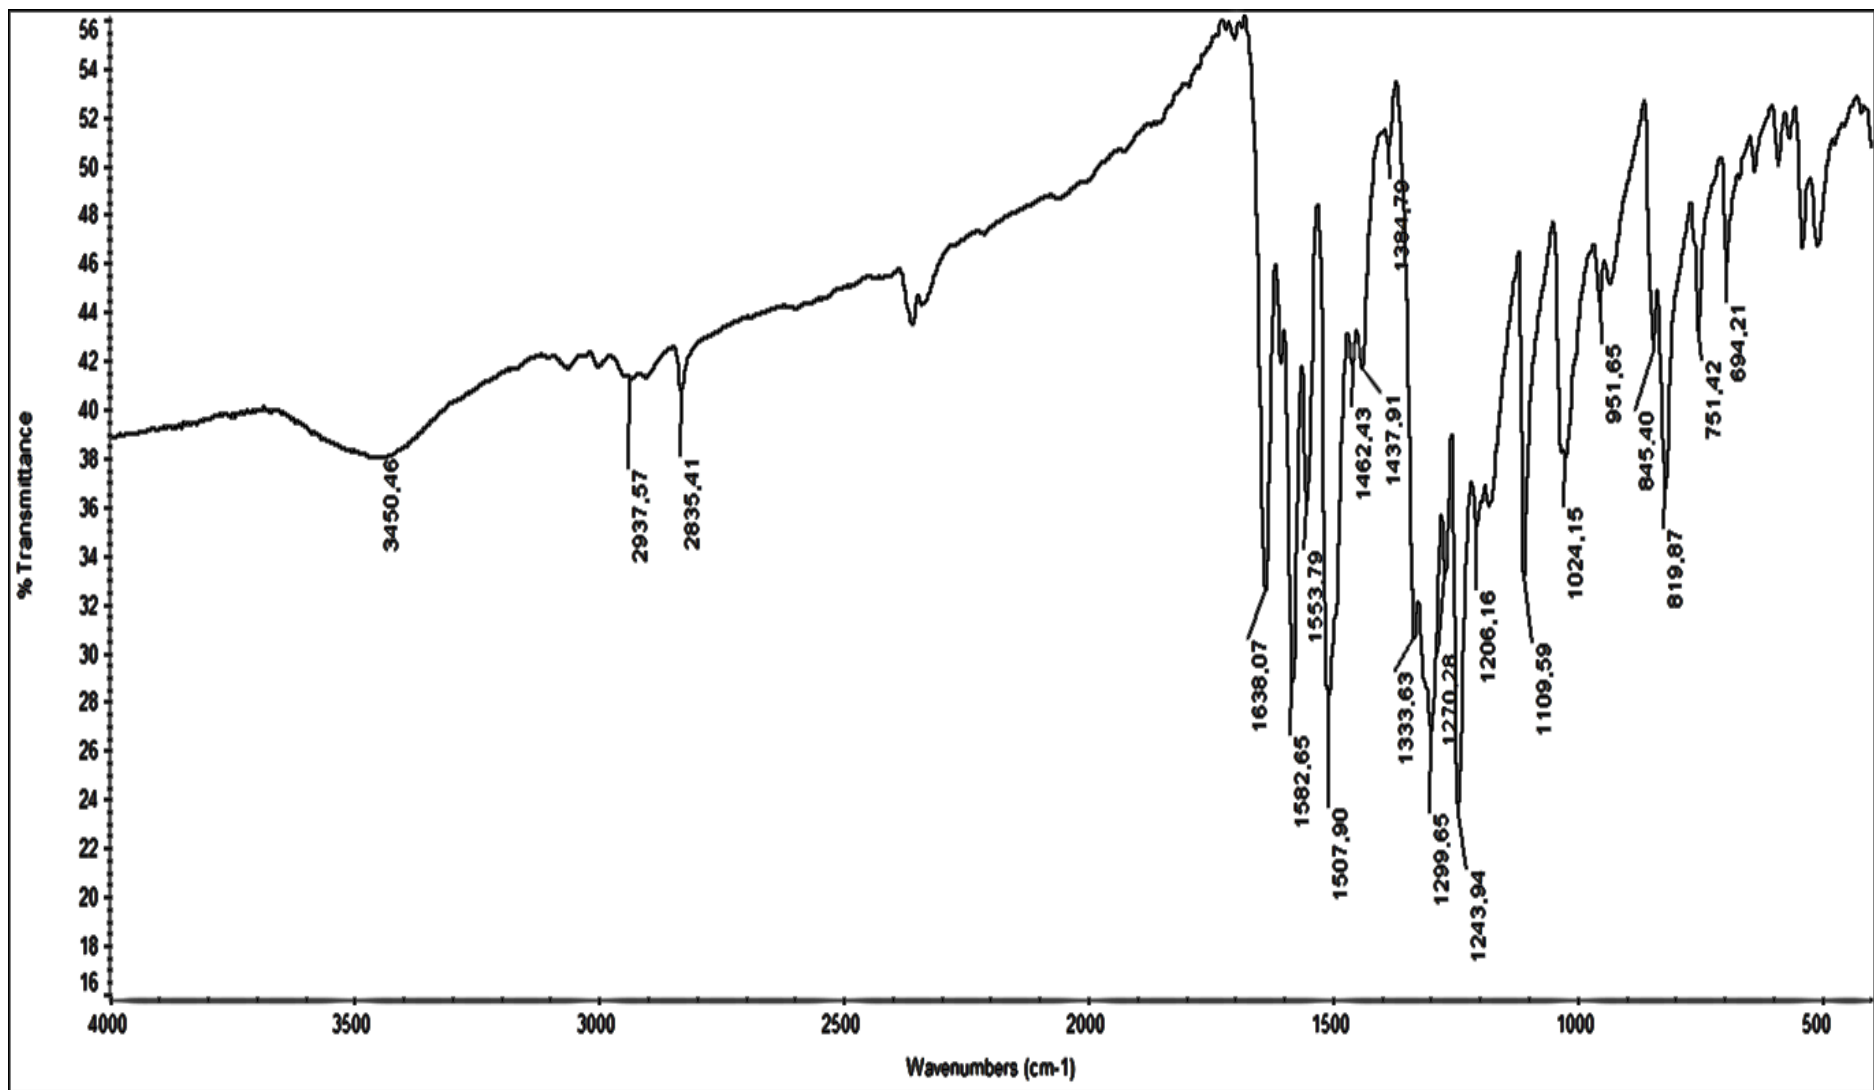

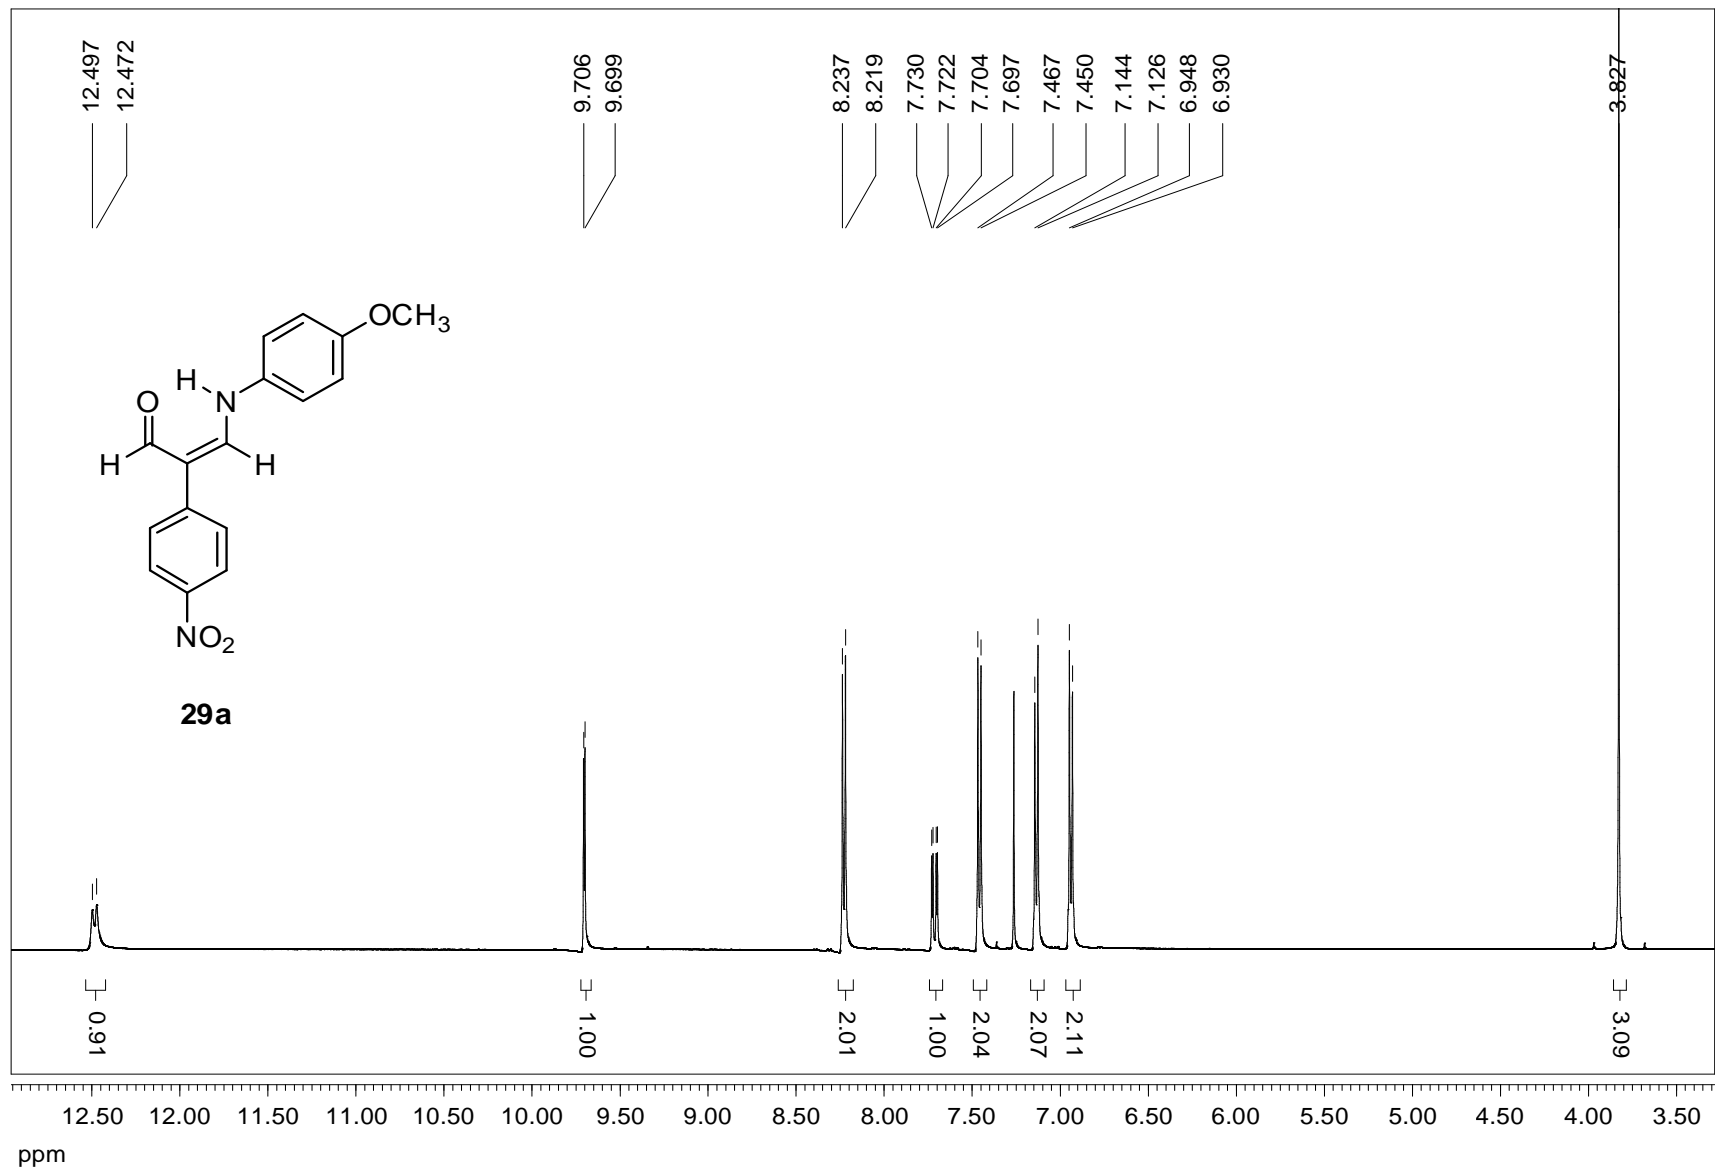

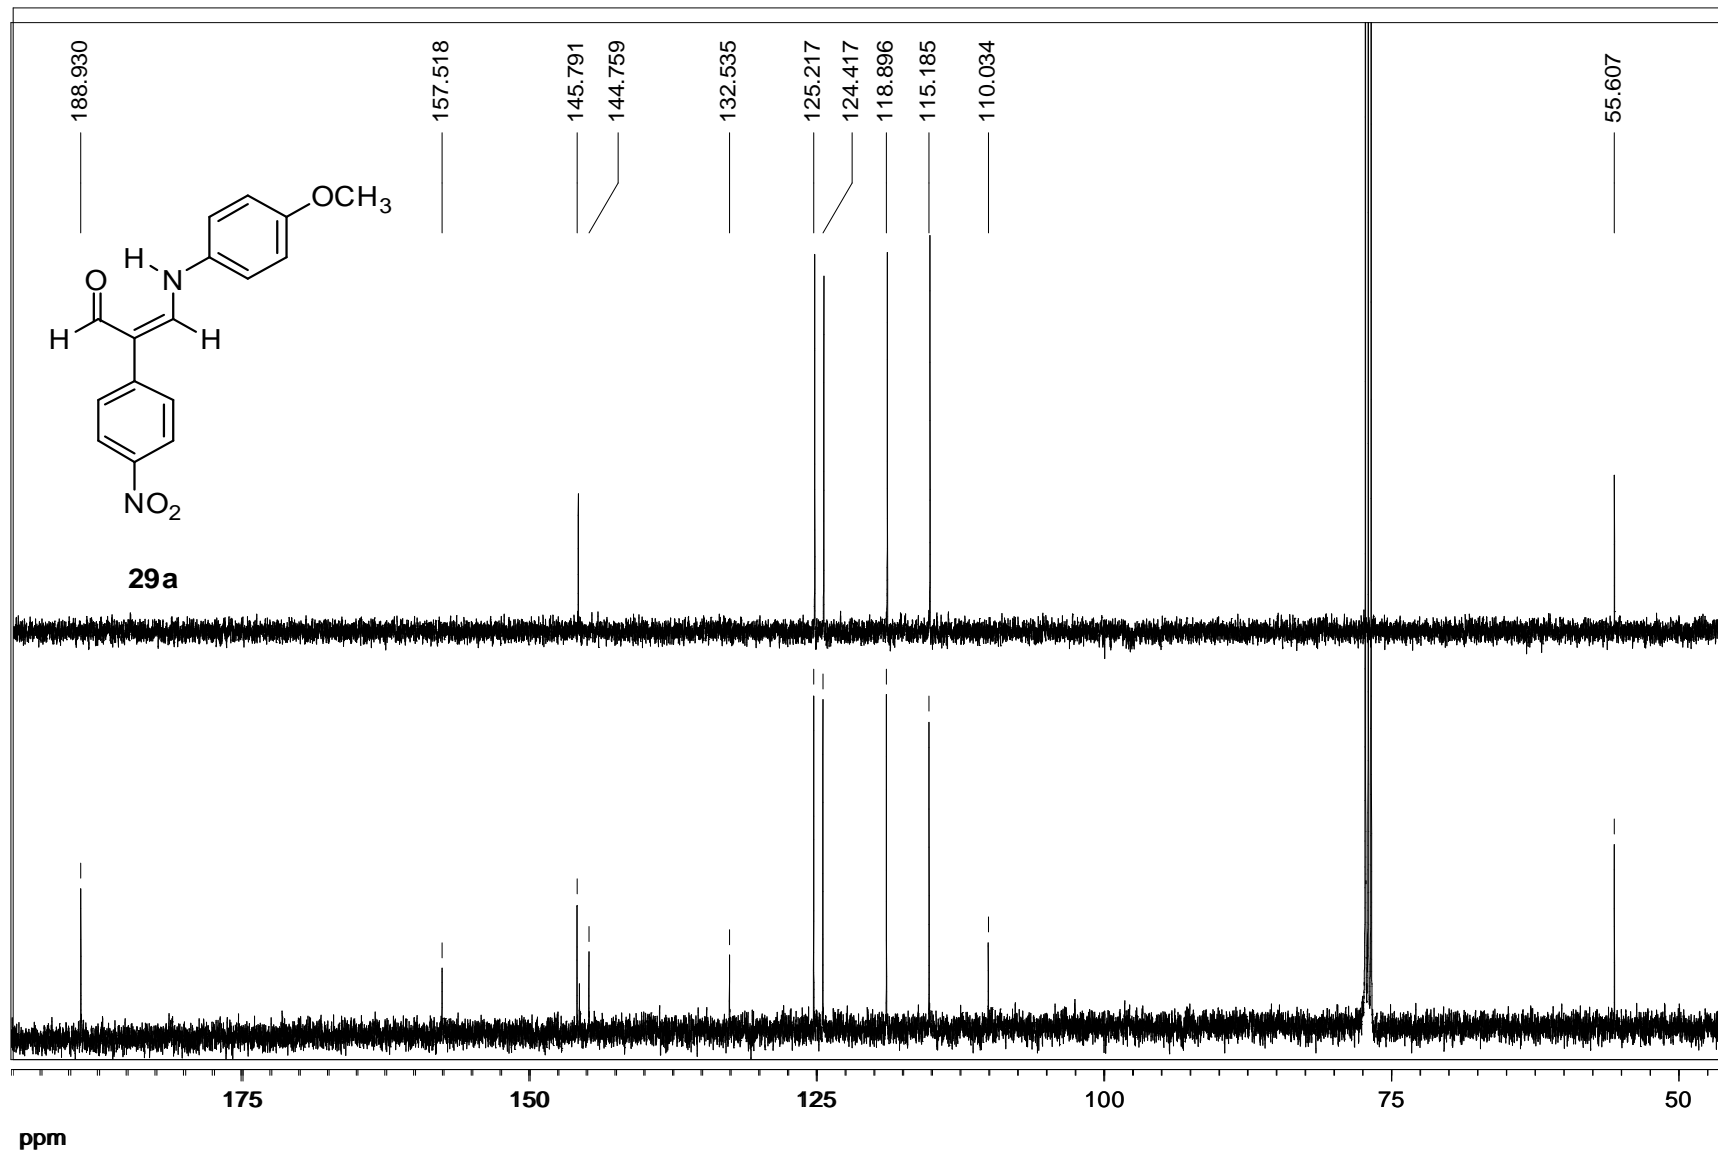



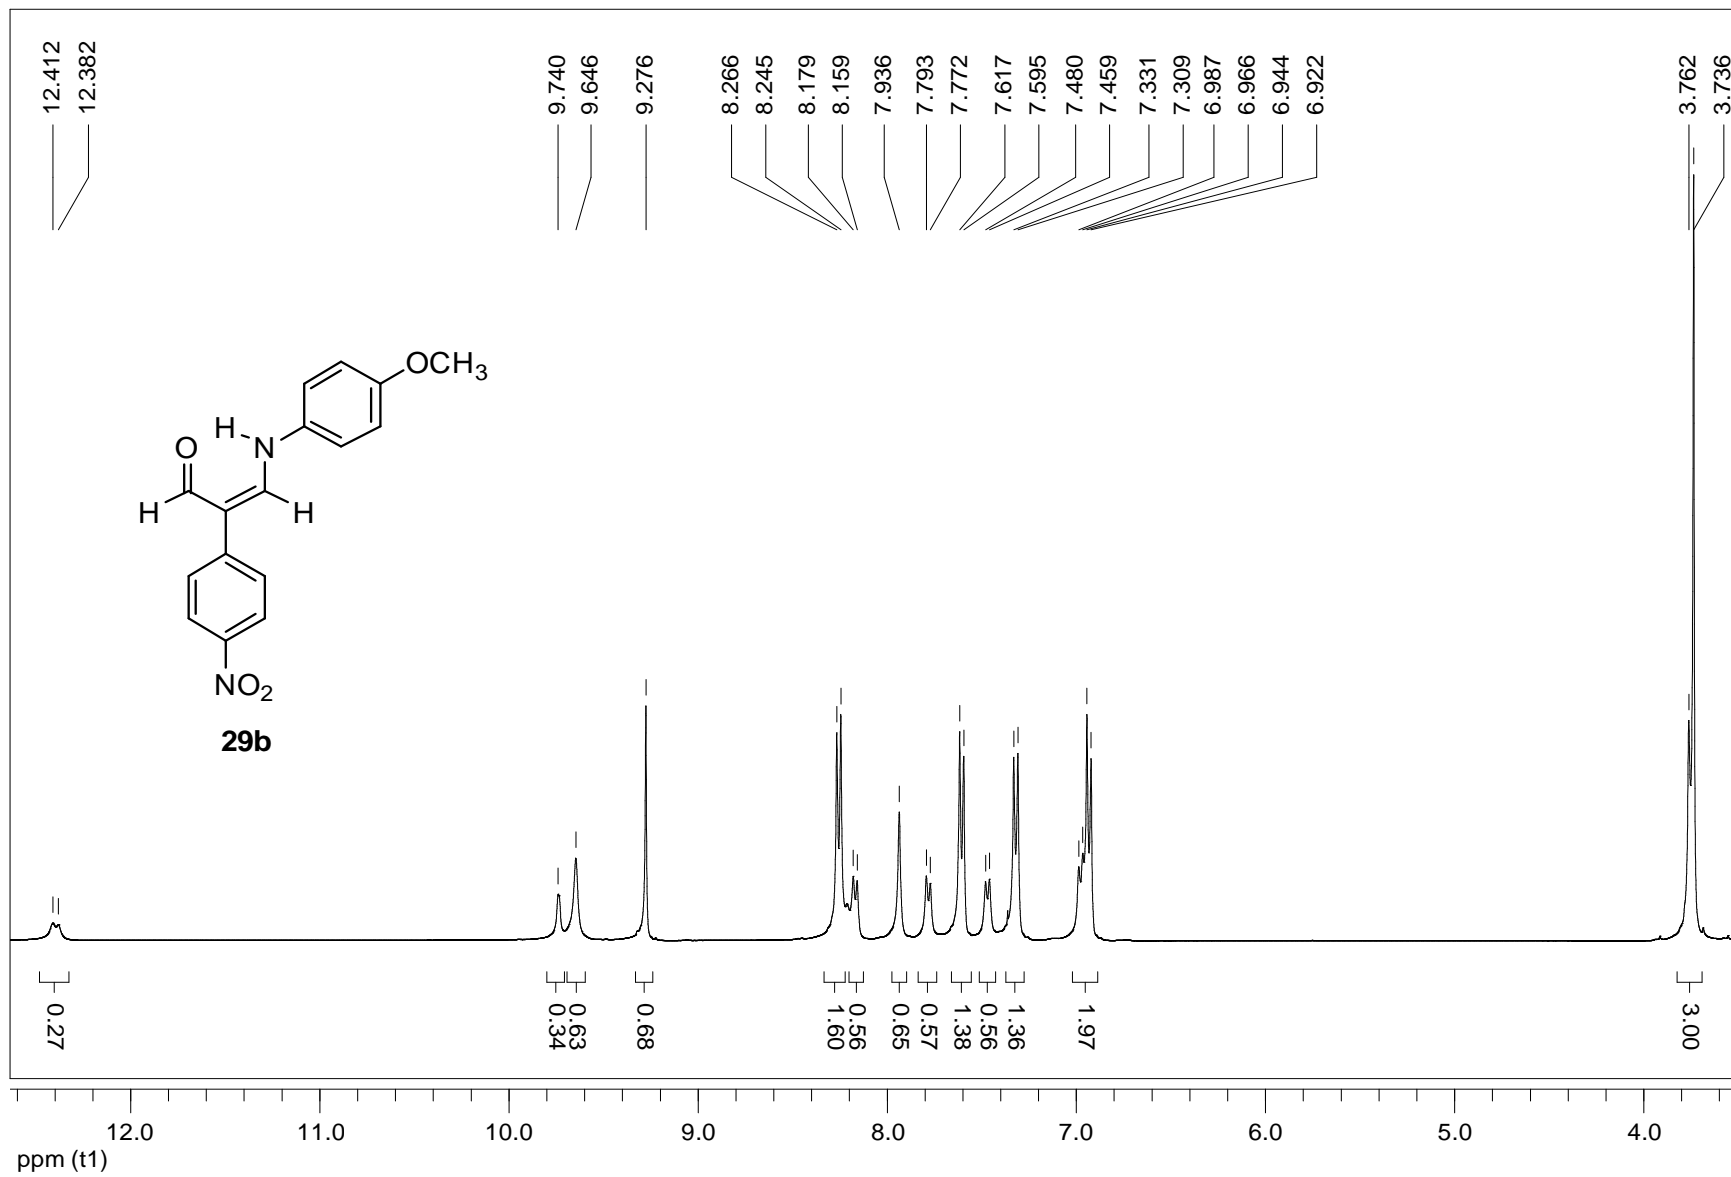

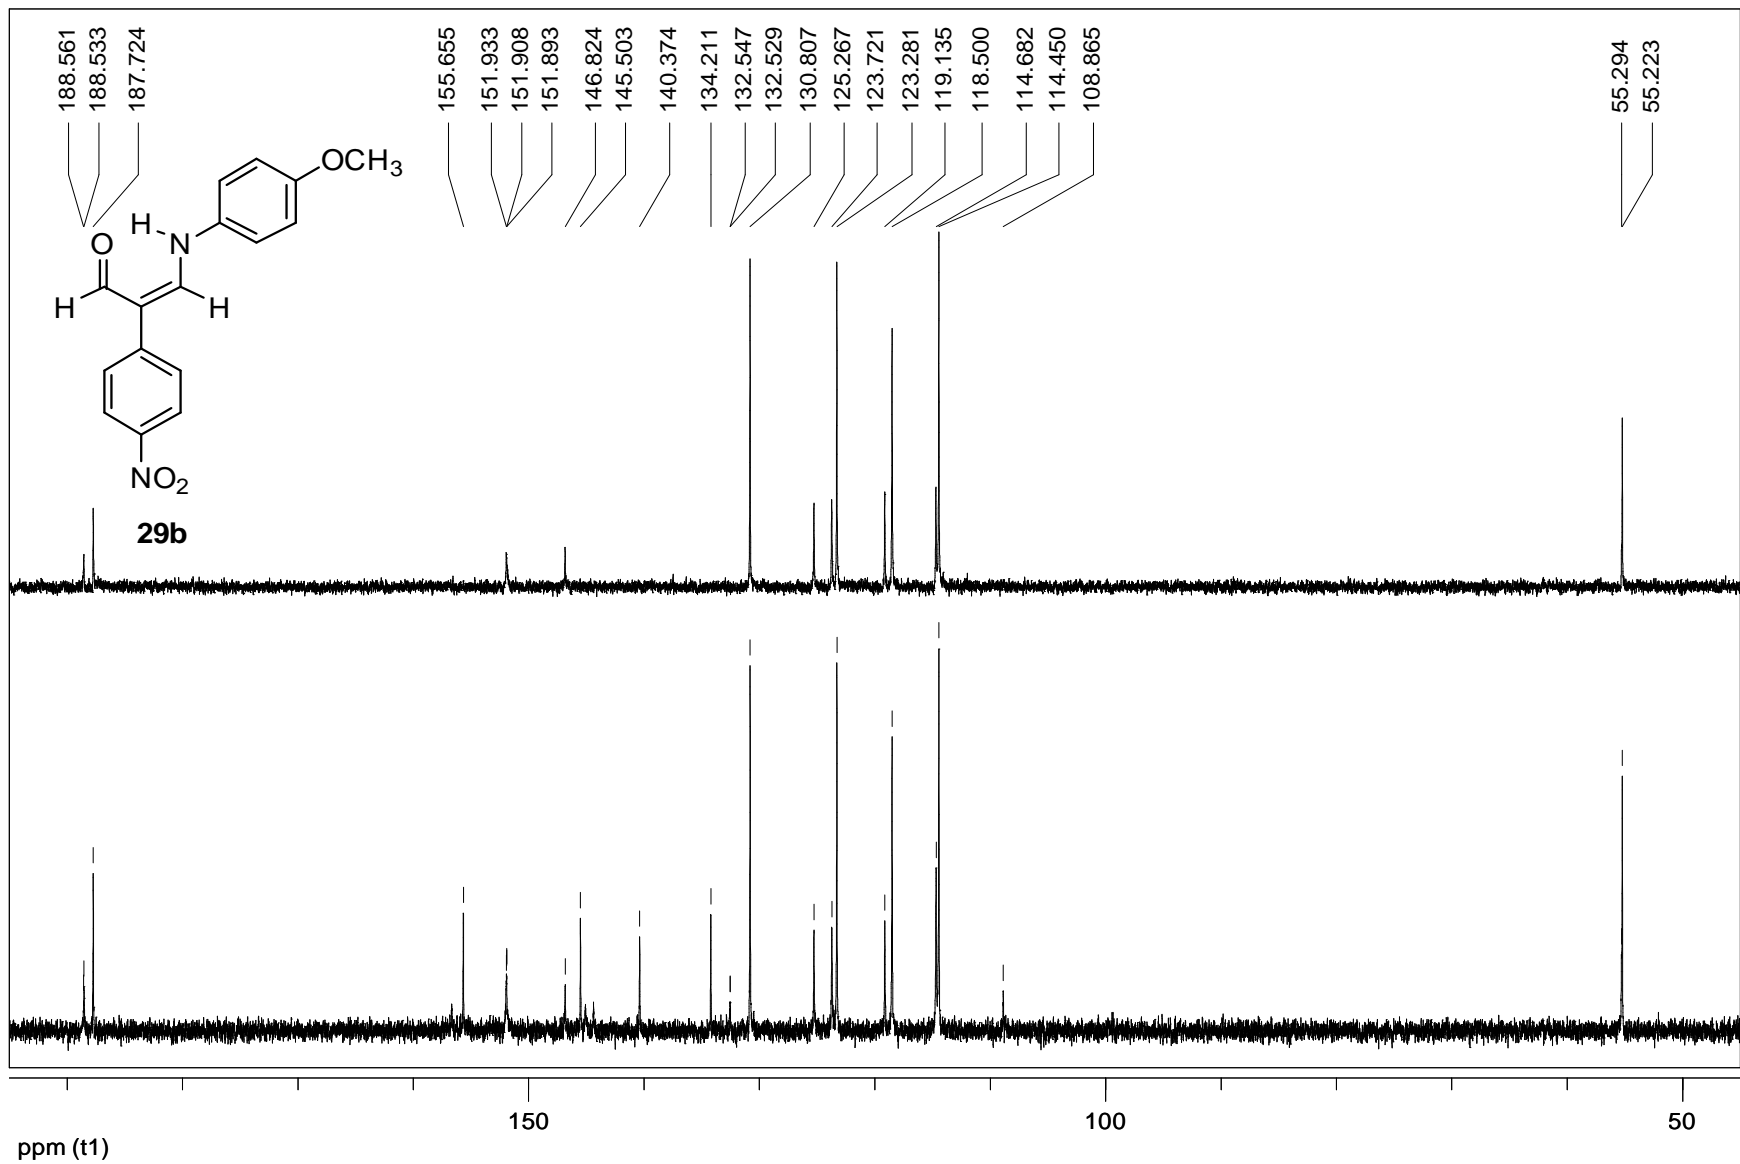

Compound 30:

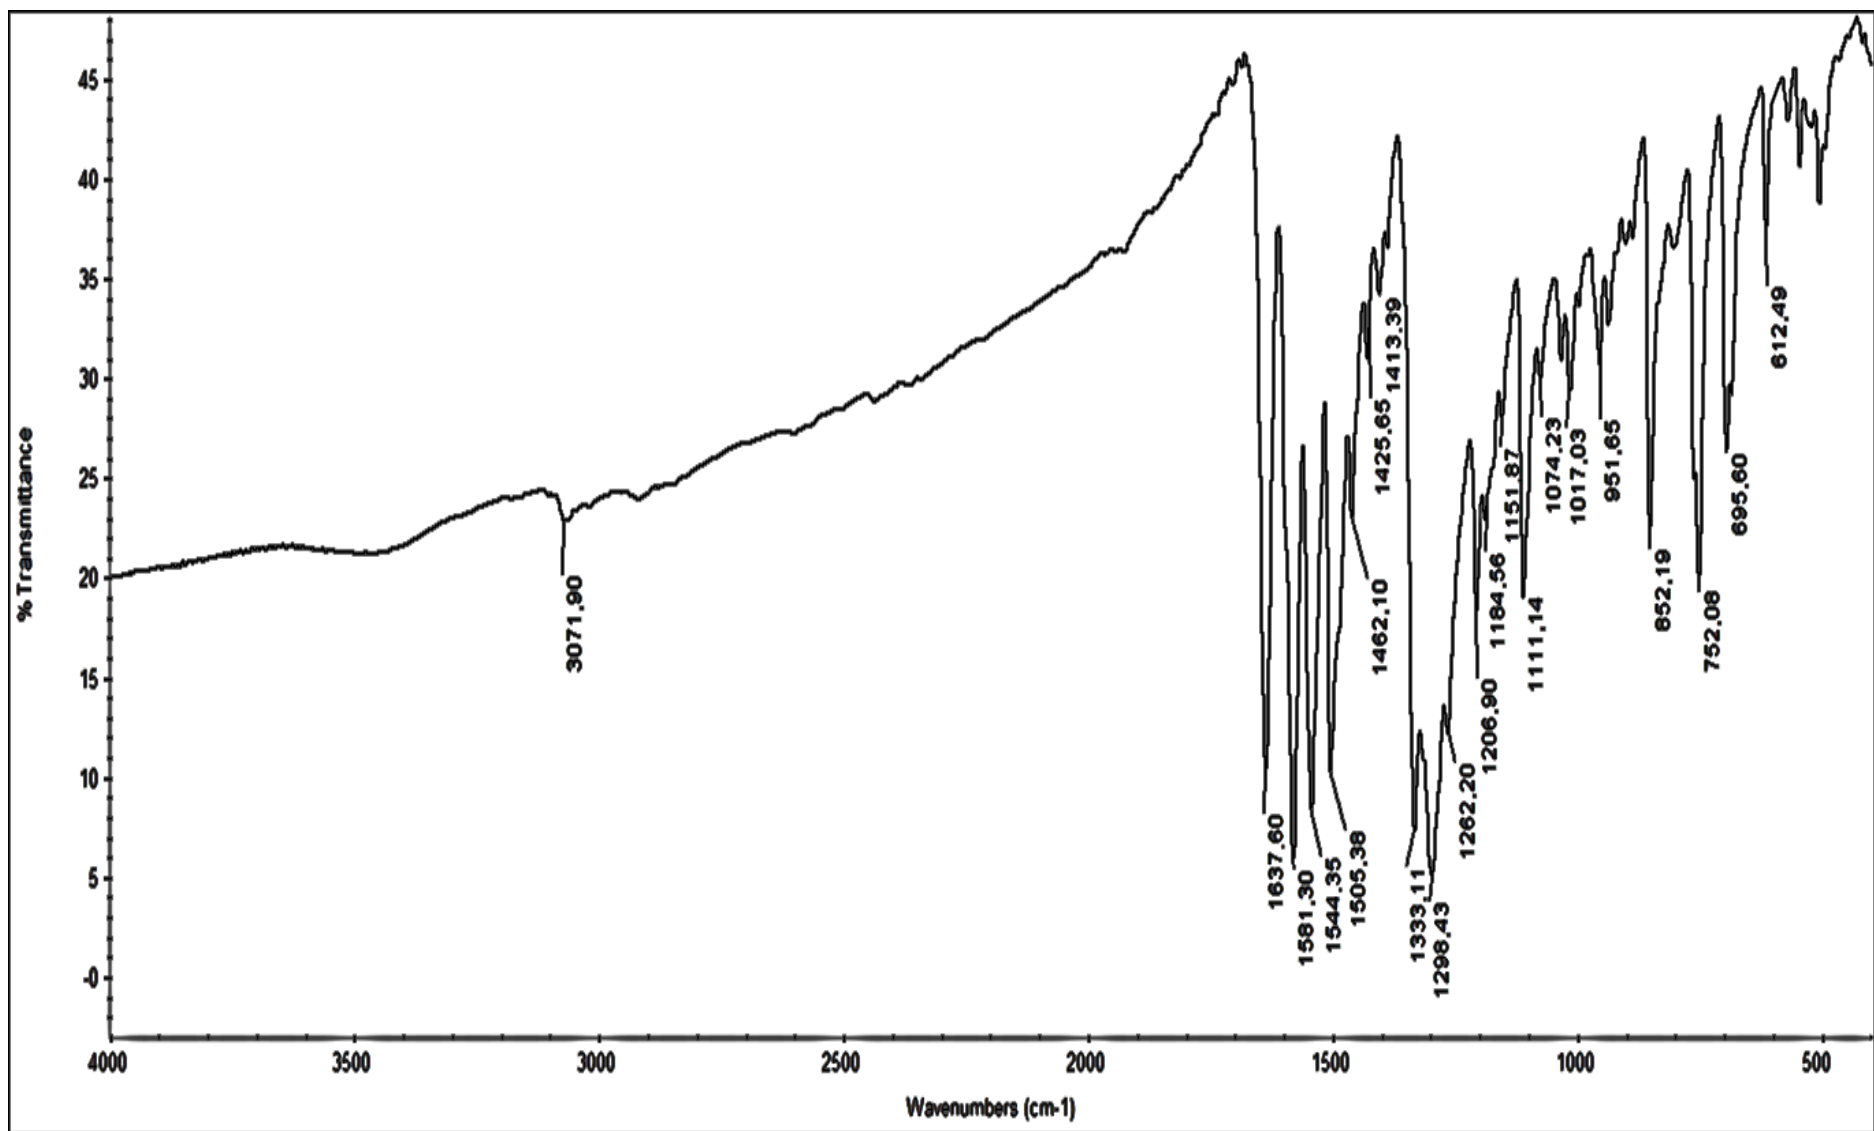

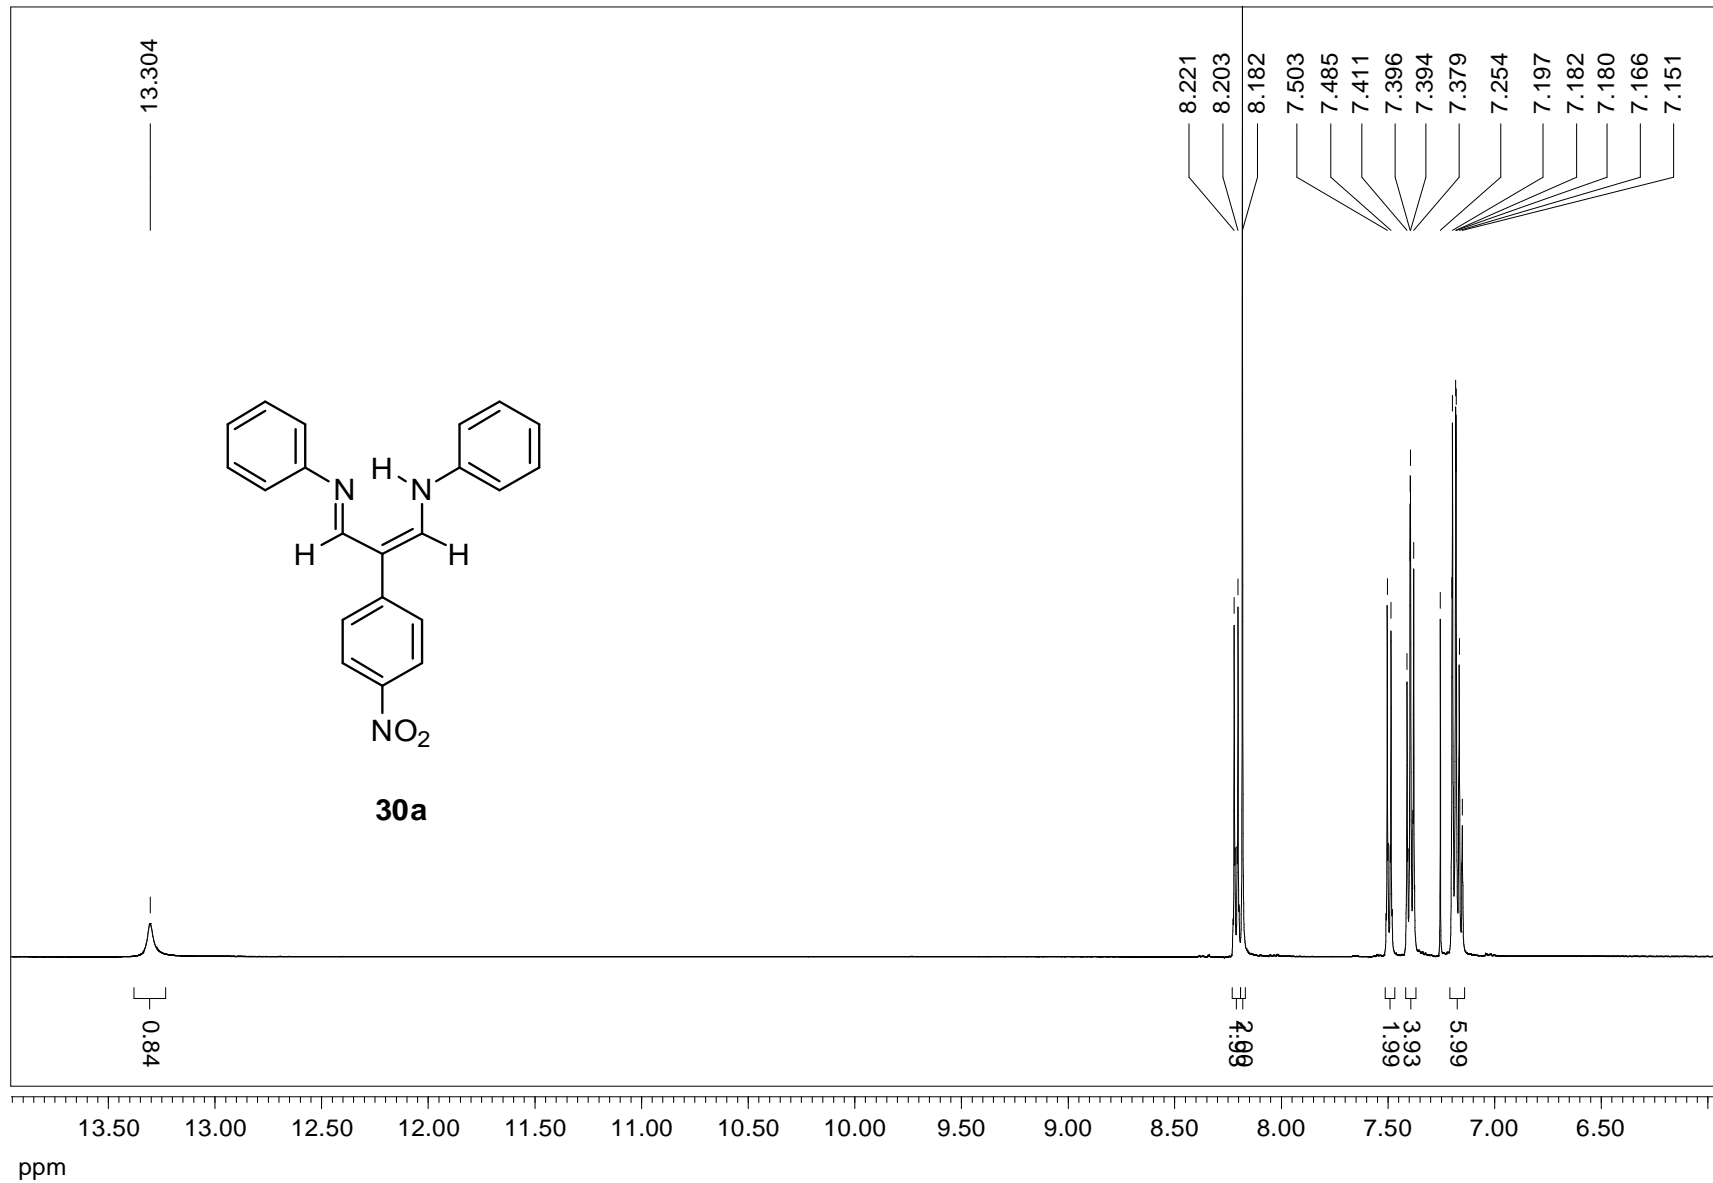

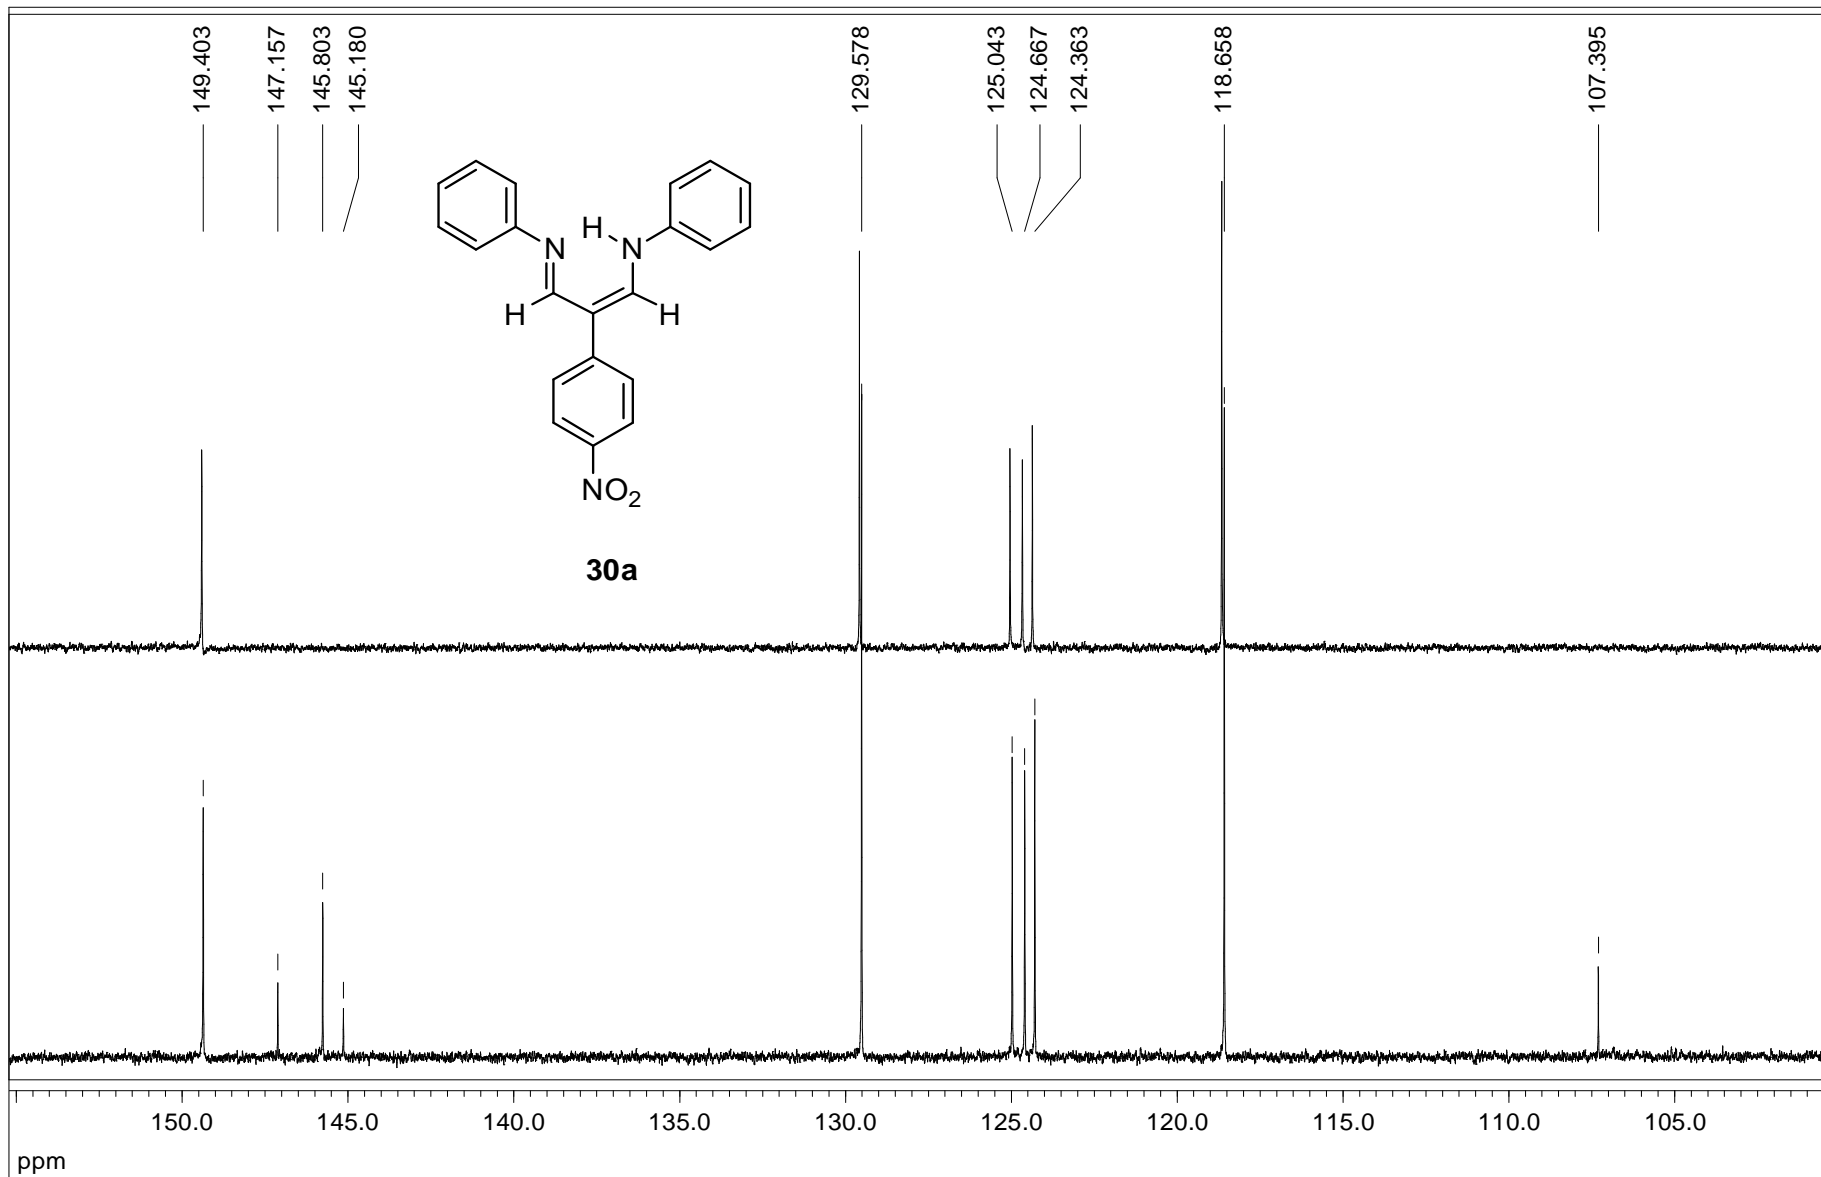

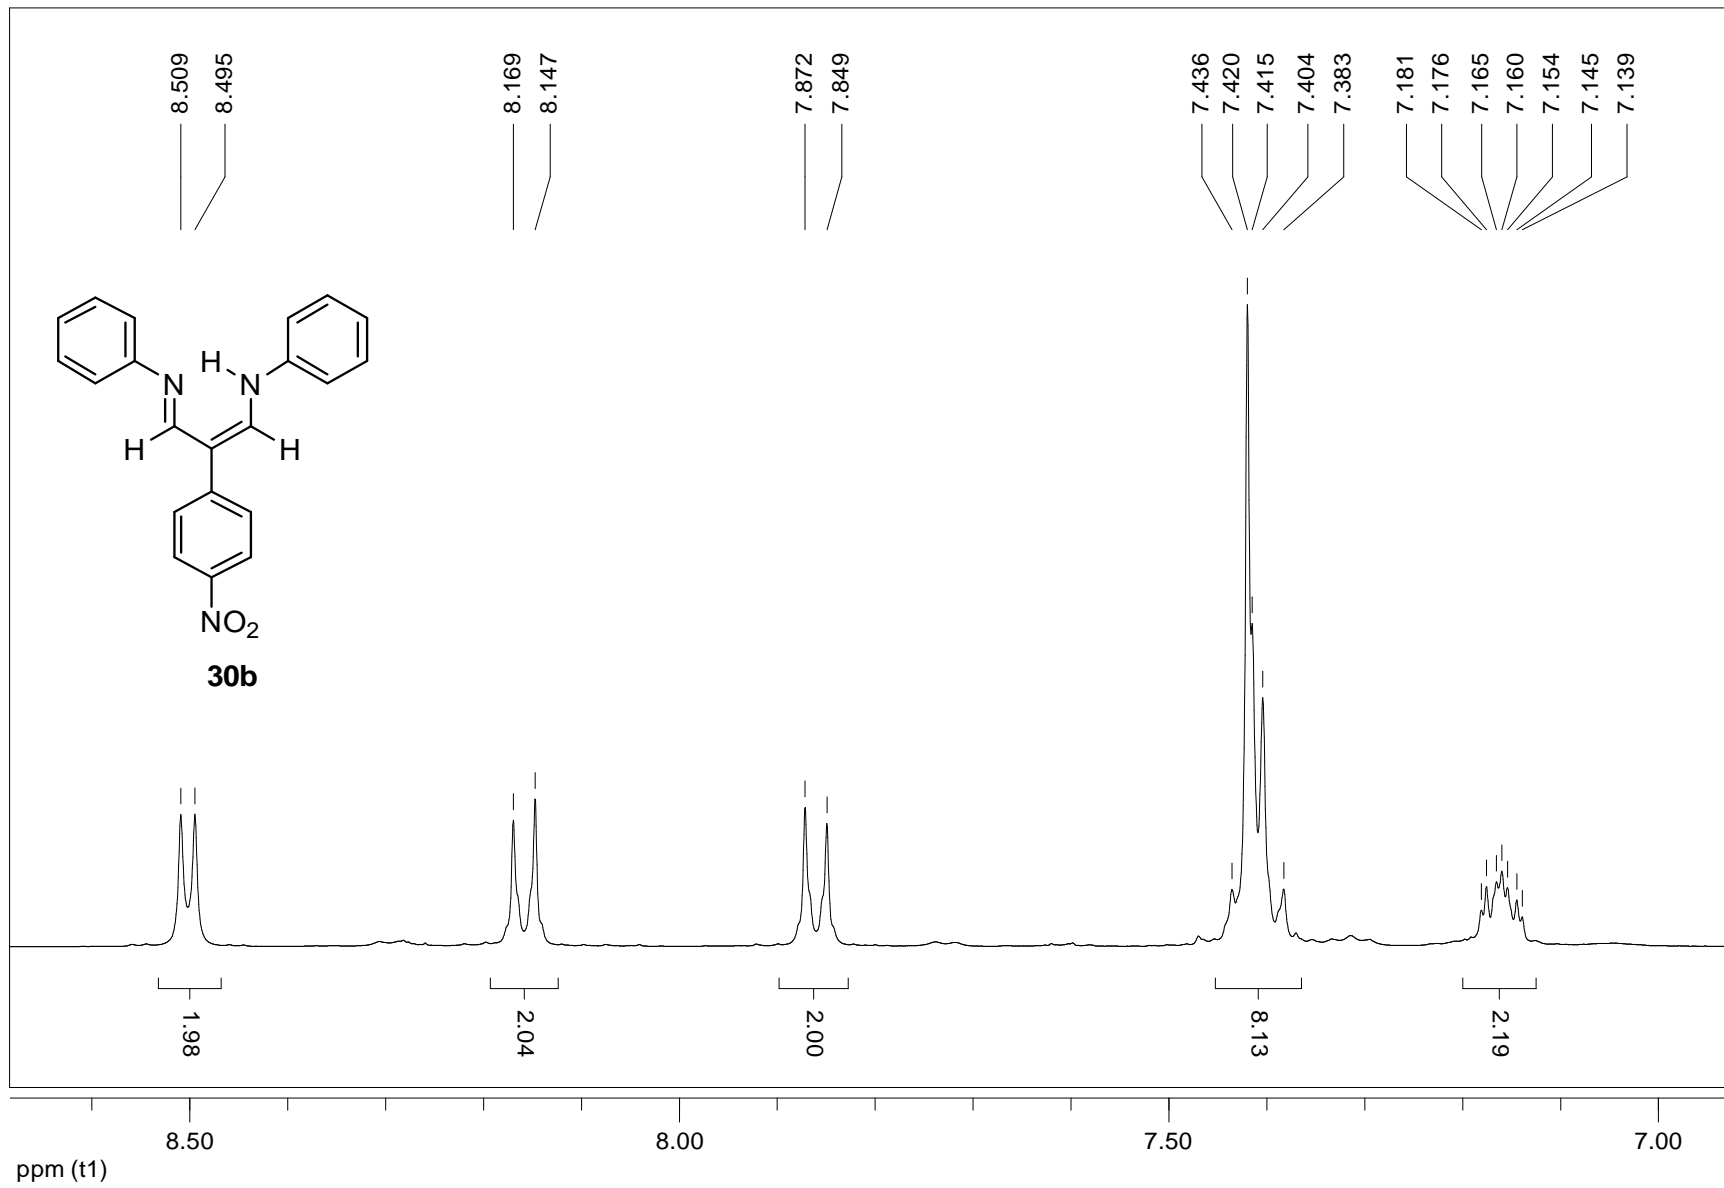

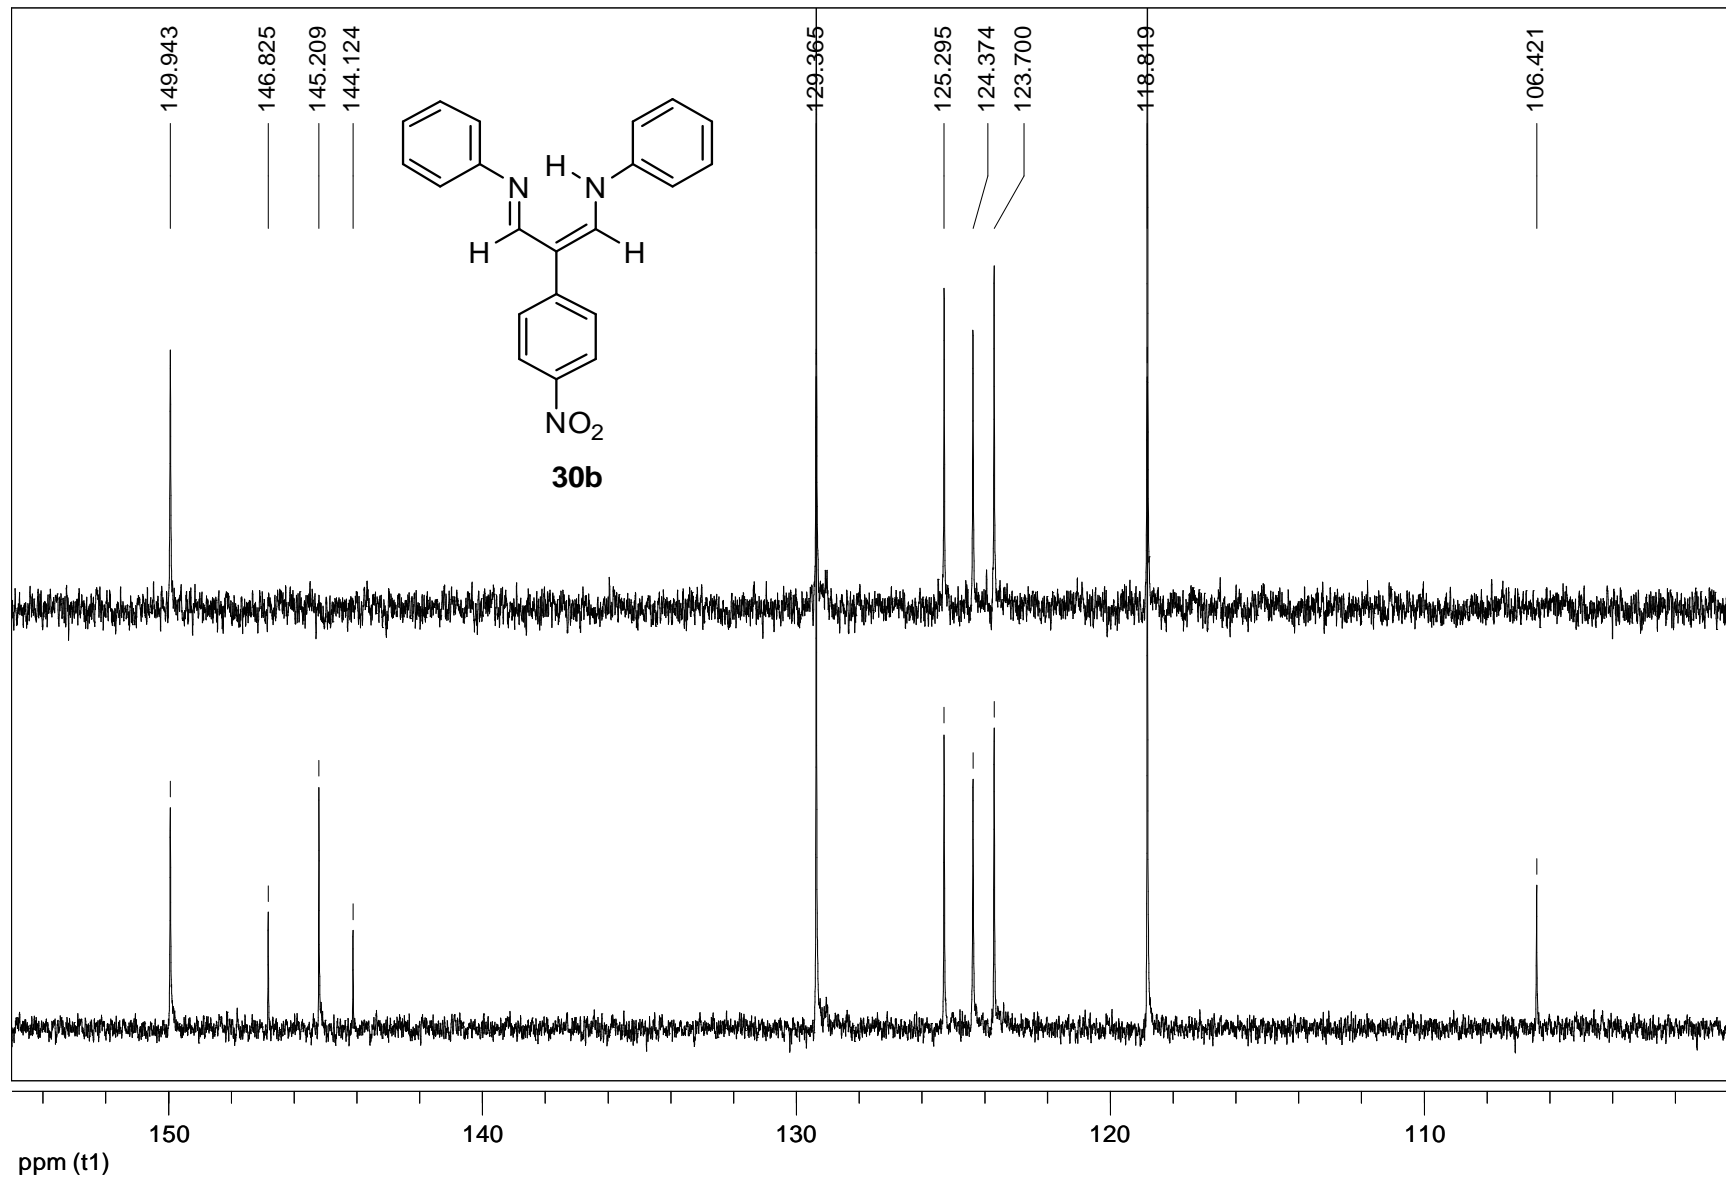

### 3. Computational data: cartesian coordinates for all optimized structures at M06-2X/6311++G(d,p) level:

#### Structure 13a (vacuum)

Energy (Hartrees): -800.667055513

No imaginary frequencies

Standard orientation:

| Center<br>Number | Atomic<br>Number | Atomic<br>Type | Coordinates (Angstroms) |           |           |
|------------------|------------------|----------------|-------------------------|-----------|-----------|
|                  |                  |                | X                       | Y         | Z         |
| 1                | 6                | 0              | -1.473495               | 1.172295  | 0.727029  |
| 2                | 6                | 0              | -2.796270               | 0.773444  | 0.829588  |
| 3                | 6                | 0              | -3.233286               | -0.290110 | 0.053273  |
| 4                | 6                | 0              | -2.390054               | -0.952396 | -0.826556 |
| 5                | 6                | 0              | -1.075939               | -0.527521 | -0.931583 |
| 6                | 6                | 0              | -0.585827               | 0.532337  | -0.152491 |
| 7                | 1                | 0              | -1.115233               | 1.972950  | 1.362776  |
| 8                | 1                | 0              | -3.483997               | 1.256642  | 1.510551  |
| 9                | 1                | 0              | -2.774422               | -1.766533 | -1.426031 |
| 10               | 1                | 0              | -0.424272               | -1.004703 | -1.654274 |
| 11               | 6                | 0              | 0.817958                | 0.963884  | -0.251796 |
| 12               | 6                | 0              | 1.821888                | 0.028866  | -0.409834 |
| 13               | 6                | 0              | 1.153670                | 2.369178  | -0.189944 |
| 14               | 1                | 0              | 1.562289                | -1.029004 | -0.413878 |
| 15               | 1                | 0              | 0.302548                | 3.065754  | -0.089498 |
| 16               | 8                | 0              | 2.289769                | 2.820712  | -0.266551 |
| 17               | 7                | 0              | 3.119253                | 0.285166  | -0.548399 |
| 18               | 1                | 0              | 3.383118                | 1.267822  | -0.506846 |
| 19               | 7                | 0              | -4.634252               | -0.727760 | 0.164812  |
| 20               | 8                | 0              | -4.986893               | -1.664172 | -0.521140 |
| 21               | 8                | 0              | -5.351594               | -0.126800 | 0.936460  |
| 22               | 6                | 0              | 4.140876                | -0.748288 | -0.543445 |
| 23               | 6                | 0              | 4.732063                | -0.992714 | 0.843881  |
| 24               | 1                | 0              | 4.928437                | -0.454072 | -1.242234 |
| 25               | 1                | 0              | 3.695366                | -1.669960 | -0.930132 |
| 26               | 6                | 0              | 5.816592                | -2.065089 | 0.808559  |
| 27               | 1                | 0              | 5.138855                | -0.052071 | 1.226445  |
| 28               | 1                | 0              | 3.924644                | -1.286403 | 1.521623  |
| 29               | 1                | 0              | 6.232583                | -2.235747 | 1.802220  |
| 30               | 1                | 0              | 5.418337                | -3.015853 | 0.444866  |
| 31               | 1                | 0              | 6.637418                | -1.771902 | 0.149274  |



## Structure 13a (CHCl<sub>3</sub>)

Energy (Hartrees): -800.690274576

No imaginary frequencies

Standard orientation:

| Center<br>Number | Atomic<br>Number | Atomic<br>Type | Coordinates (Angstroms) |           |           |
|------------------|------------------|----------------|-------------------------|-----------|-----------|
|                  |                  |                | X                       | Y         | Z         |
| 1                | 6                | 0              | -1.513457               | 1.224696  | 0.647343  |
| 2                | 6                | 0              | -2.837904               | 0.836283  | 0.754395  |
| 3                | 6                | 0              | -3.262576               | -0.288707 | 0.058519  |
| 4                | 6                | 0              | -2.398743               | -1.022238 | -0.745390 |
| 5                | 6                | 0              | -1.082682               | -0.609195 | -0.856160 |
| 6                | 6                | 0              | -0.605729               | 0.514831  | -0.158710 |
| 7                | 1                | 0              | -1.171886               | 2.074532  | 1.225688  |
| 8                | 1                | 0              | -3.529883               | 1.381134  | 1.382870  |
| 9                | 1                | 0              | -2.760304               | -1.886454 | -1.286812 |
| 10               | 1                | 0              | -0.418959               | -1.154625 | -1.516688 |
| 11               | 6                | 0              | 0.799190                | 0.936766  | -0.262564 |
| 12               | 6                | 0              | 1.800429                | -0.020096 | -0.389355 |
| 13               | 6                | 0              | 1.137549                | 2.333961  | -0.235612 |
| 14               | 1                | 0              | 1.530178                | -1.074282 | -0.371000 |
| 15               | 1                | 0              | 0.292085                | 3.039284  | -0.168872 |
| 16               | 8                | 0              | 2.281462                | 2.785311  | -0.310438 |
| 17               | 7                | 0              | 3.094515                | 0.216464  | -0.512760 |
| 18               | 1                | 0              | 3.381261                | 1.193339  | -0.504310 |
| 19               | 7                | 0              | -4.657354               | -0.714734 | 0.177714  |
| 20               | 8                | 0              | -5.006628               | -1.709689 | -0.428619 |
| 21               | 8                | 0              | -5.400592               | -0.054672 | 0.878326  |
| 22               | 6                | 0              | 4.114126                | -0.823503 | -0.505445 |
| 23               | 6                | 0              | 4.885729                | -0.856750 | 0.810844  |
| 24               | 1                | 0              | 4.798253                | -0.642681 | -1.338969 |
| 25               | 1                | 0              | 3.617494                | -1.780810 | -0.682060 |
| 26               | 6                | 0              | 5.960424                | -1.938289 | 0.798409  |
| 27               | 1                | 0              | 5.339470                | 0.124693  | 0.979888  |
| 28               | 1                | 0              | 4.178710                | -1.029284 | 1.627734  |
| 29               | 1                | 0              | 6.513017                | -1.952010 | 1.739582  |
| 30               | 1                | 0              | 5.519630                | -2.928758 | 0.655124  |
| 31               | 1                | 0              | 6.678722                | -1.770337 | -0.008641 |

## Structure 13a (DMSO)

Energy (Hartrees): -800.689628259

No imaginary frequencies

Standard orientation:

| Center<br>Number | Atomic<br>Number | Atomic<br>Type | Coordinates (Angstroms) |           |           |
|------------------|------------------|----------------|-------------------------|-----------|-----------|
|                  |                  |                | X                       | Y         | Z         |
| 1                | 6                | 0              | -1.523234               | 1.237942  | 0.625909  |
| 2                | 6                | 0              | -2.848279               | 0.851973  | 0.729449  |
| 3                | 6                | 0              | -3.266718               | -0.291467 | 0.059061  |
| 4                | 6                | 0              | -2.392658               | -1.046653 | -0.714566 |
| 5                | 6                | 0              | -1.075539               | -0.637411 | -0.822263 |
| 6                | 6                | 0              | -0.605881               | 0.507222  | -0.152129 |
| 7                | 1                | 0              | -1.190162               | 2.104879  | 1.183589  |
| 8                | 1                | 0              | -3.543914               | 1.415925  | 1.336830  |
| 9                | 1                | 0              | -2.744077               | -1.926524 | -1.237186 |
| 10               | 1                | 0              | -0.406206               | -1.204920 | -1.457946 |
| 11               | 6                | 0              | 0.797178                | 0.931059  | -0.256186 |
| 12               | 6                | 0              | 1.802704                | -0.026424 | -0.376886 |
| 13               | 6                | 0              | 1.128456                | 2.328934  | -0.241323 |
| 14               | 1                | 0              | 1.538640                | -1.081781 | -0.355222 |
| 15               | 1                | 0              | 0.278025                | 3.028937  | -0.187398 |
| 16               | 8                | 0              | 2.270470                | 2.788550  | -0.314687 |
| 17               | 7                | 0              | 3.093550                | 0.216047  | -0.498211 |
| 18               | 1                | 0              | 3.379595                | 1.193035  | -0.496267 |
| 19               | 7                | 0              | -4.661078               | -0.713022 | 0.173116  |
| 20               | 8                | 0              | -5.006016               | -1.724686 | -0.410328 |
| 21               | 8                | 0              | -5.414334               | -0.034059 | 0.847142  |
| 22               | 6                | 0              | 4.118462                | -0.819611 | -0.502800 |
| 23               | 6                | 0              | 4.903304                | -0.844829 | 0.804970  |
| 24               | 1                | 0              | 4.792067                | -0.632180 | -1.343209 |
| 25               | 1                | 0              | 3.624153                | -1.779024 | -0.671787 |
| 26               | 6                | 0              | 5.980705                | -1.923174 | 0.781482  |
| 27               | 1                | 0              | 5.355596                | 0.138811  | 0.965809  |
| 28               | 1                | 0              | 4.205340                | -1.020288 | 1.629152  |
| 29               | 1                | 0              | 6.543909                | -1.936075 | 1.716691  |
| 30               | 1                | 0              | 5.539224                | -2.913858 | 0.641492  |
| 31               | 1                | 0              | 6.688535                | -1.751928 | -0.034209 |

## Structure 13a (C<sub>2</sub>H<sub>5</sub>OH)

Energy (Hartrees): -800.689688188

No imaginary frequencies

Standard orientation:

| Center<br>Number | Atomic<br>Number | Atomic<br>Type | Coordinates (Angstroms) |           |           |
|------------------|------------------|----------------|-------------------------|-----------|-----------|
|                  |                  |                | X                       | Y         | Z         |
| 1                | 6                | 0              | -1.644942               | 1.329705  | 0.429036  |
| 2                | 6                | 0              | -2.982044               | 0.978739  | 0.479732  |
| 3                | 6                | 0              | -3.359715               | -0.279630 | 0.024985  |
| 4                | 6                | 0              | -2.434985               | -1.183892 | -0.486542 |
| 5                | 6                | 0              | -1.105052               | -0.809932 | -0.546853 |
| 6                | 6                | 0              | -0.675644               | 0.448105  | -0.084567 |
| 7                | 1                | 0              | -1.346200               | 2.293118  | 0.823859  |
| 8                | 1                | 0              | -3.718451               | 1.660147  | 0.885294  |
| 9                | 1                | 0              | -2.756715               | -2.152250 | -0.846973 |
| 10               | 1                | 0              | -0.390906               | -1.499924 | -0.980843 |
| 11               | 6                | 0              | 0.741257                | 0.835742  | -0.133667 |
| 12               | 6                | 0              | 1.729040                | -0.135540 | 0.030285  |
| 13               | 6                | 0              | 1.101484                | 2.200869  | -0.370469 |
| 14               | 1                | 0              | 1.430867                | -1.163919 | 0.224401  |
| 15               | 1                | 0              | 0.271980                | 2.901316  | -0.556433 |
| 16               | 8                | 0              | 2.261237                | 2.632960  | -0.411877 |
| 17               | 7                | 0              | 3.031125                | 0.058603  | -0.001227 |
| 18               | 1                | 0              | 3.363702                | 1.005367  | -0.166980 |
| 19               | 7                | 0              | -4.763150               | -0.663571 | 0.091064  |
| 20               | 8                | 0              | -5.080154               | -1.777074 | -0.289316 |
| 21               | 8                | 0              | -5.566151               | 0.142902  | 0.526416  |
| 22               | 6                | 0              | 4.003445                | -1.017482 | 0.203796  |
| 23               | 6                | 0              | 5.420800                | -0.478127 | 0.105861  |
| 24               | 1                | 0              | 3.839957                | -1.790668 | -0.552494 |
| 25               | 1                | 0              | 3.836216                | -1.464947 | 1.187871  |
| 26               | 6                | 0              | 6.444962                | -1.590145 | 0.300355  |
| 27               | 1                | 0              | 5.558304                | -0.007585 | -0.872907 |
| 28               | 1                | 0              | 5.560787                | 0.299658  | 0.863204  |
| 29               | 1                | 0              | 7.462125                | -1.198823 | 0.235913  |
| 30               | 1                | 0              | 6.327958                | -2.064309 | 1.278682  |
| 31               | 1                | 0              | 6.333465                | -2.363184 | -0.464945 |

### Structure 13b (vacuum)

Energy (Hartrees): -800.660297675

No imaginary frequencies

Standard orientation:

| Center<br>Number | Atomic<br>Number | Atomic<br>Type | Coordinates (Angstroms) |           |           |
|------------------|------------------|----------------|-------------------------|-----------|-----------|
|                  |                  |                | X                       | Y         | Z         |
| 1                | 6                | 0              | -1.275257               | 1.204781  | 0.866348  |
| 2                | 6                | 0              | -2.539070               | 0.644247  | 0.963342  |
| 3                | 6                | 0              | -2.910452               | -0.318325 | 0.036562  |
| 4                | 6                | 0              | -2.066585               | -0.721841 | -0.987617 |
| 5                | 6                | 0              | -0.811115               | -0.140567 | -1.078385 |
| 6                | 6                | 0              | -0.386979               | 0.824506  | -0.151244 |
| 7                | 1                | 0              | -0.960361               | 1.934436  | 1.603200  |
| 8                | 1                | 0              | -3.228391               | 0.927654  | 1.747223  |
| 9                | 1                | 0              | -2.406835               | -1.460926 | -1.700673 |
| 10               | 1                | 0              | -0.161637               | -0.406291 | -1.905257 |
| 11               | 6                | 0              | 0.944837                | 1.443866  | -0.244826 |
| 12               | 6                | 0              | 2.099445                | 0.746346  | -0.460102 |
| 13               | 6                | 0              | 1.083329                | 2.893946  | -0.073077 |
| 14               | 1                | 0              | 3.017014                | 1.330483  | -0.500500 |
| 15               | 1                | 0              | 0.128089                | 3.435193  | 0.074302  |
| 16               | 8                | 0              | 2.128251                | 3.506932  | -0.097848 |
| 17               | 7                | 0              | 2.255670                | -0.577208 | -0.622412 |
| 18               | 1                | 0              | 1.449536                | -1.169473 | -0.471924 |
| 19               | 7                | 0              | -4.246733               | -0.932032 | 0.139848  |
| 20               | 8                | 0              | -4.527572               | -1.802098 | -0.657110 |
| 21               | 8                | 0              | -4.982291               | -0.531074 | 1.016041  |
| 22               | 6                | 0              | 3.565426                | -1.213717 | -0.586174 |
| 23               | 6                | 0              | 4.020304                | -1.580608 | 0.824991  |
| 24               | 1                | 0              | 4.279230                | -0.523686 | -1.044307 |
| 25               | 1                | 0              | 3.533023                | -2.105424 | -1.217995 |
| 26               | 6                | 0              | 5.401911                | -2.227863 | 0.816291  |
| 27               | 1                | 0              | 4.026283                | -0.674102 | 1.437972  |
| 28               | 1                | 0              | 3.286973                | -2.259997 | 1.270951  |
| 29               | 1                | 0              | 5.716630                | -2.496107 | 1.825394  |
| 30               | 1                | 0              | 5.405902                | -3.138499 | 0.211779  |
| 31               | 1                | 0              | 6.150117                | -1.547289 | 0.402473  |

## Structure 13b (CHCl<sub>3</sub>)

Energy (Hartrees): -800.685336998

No imaginary frequencies

Standard orientation:

| Center<br>Number | Atomic<br>Number | Atomic<br>Type | Coordinates (Angstroms) |           |           |
|------------------|------------------|----------------|-------------------------|-----------|-----------|
|                  |                  |                | X                       | Y         | Z         |
| 1                | 6                | 0              | -1.335579               | 1.251513  | 0.821995  |
| 2                | 6                | 0              | -2.592367               | 0.676224  | 0.909202  |
| 3                | 6                | 0              | -2.915990               | -0.348421 | 0.029698  |
| 4                | 6                | 0              | -2.028050               | -0.798248 | -0.938747 |
| 5                | 6                | 0              | -0.780544               | -0.201376 | -1.021338 |
| 6                | 6                | 0              | -0.404063               | 0.827413  | -0.140838 |
| 7                | 1                | 0              | -1.063090               | 2.029962  | 1.524996  |
| 8                | 1                | 0              | -3.305803               | 1.001210  | 1.654959  |
| 9                | 1                | 0              | -2.320997               | -1.584408 | -1.622051 |
| 10               | 1                | 0              | -0.103044               | -0.511617 | -1.809067 |
| 11               | 6                | 0              | 0.916247                | 1.471322  | -0.228894 |
| 12               | 6                | 0              | 2.100112                | 0.791353  | -0.414857 |
| 13               | 6                | 0              | 1.011498                | 2.915452  | -0.095311 |
| 14               | 1                | 0              | 3.004661                | 1.393228  | -0.471620 |
| 15               | 1                | 0              | 0.041939                | 3.436049  | 0.013262  |
| 16               | 8                | 0              | 2.041821                | 3.571744  | -0.112713 |
| 17               | 7                | 0              | 2.293400                | -0.519538 | -0.514439 |
| 18               | 1                | 0              | 1.504851                | -1.141374 | -0.380677 |
| 19               | 7                | 0              | -4.238517               | -0.974595 | 0.123650  |
| 20               | 8                | 0              | -4.480117               | -1.913765 | -0.609471 |
| 21               | 8                | 0              | -5.027782               | -0.524696 | 0.930677  |
| 22               | 6                | 0              | 3.616492                | -1.132393 | -0.555870 |
| 23               | 6                | 0              | 4.081555                | -1.614349 | 0.815339  |
| 24               | 1                | 0              | 4.311291                | -0.389234 | -0.953815 |
| 25               | 1                | 0              | 3.585582                | -1.966444 | -1.261972 |
| 26               | 6                | 0              | 5.461844                | -2.257714 | 0.738058  |
| 27               | 1                | 0              | 4.096478                | -0.760689 | 1.500050  |
| 28               | 1                | 0              | 3.352946                | -2.329994 | 1.209333  |
| 29               | 1                | 0              | 5.794532                | -2.591820 | 1.722514  |
| 30               | 1                | 0              | 5.455420                | -3.126913 | 0.074699  |
| 31               | 1                | 0              | 6.202761                | -1.549935 | 0.356347  |

## Structure 13b (DMSO)

Energy (Hartrees): -800.685553531

No imaginary frequencies

Standard orientation:

| Center<br>Number | Atomic<br>Number | Atomic<br>Type | Coordinates (Angstroms) |           |           |
|------------------|------------------|----------------|-------------------------|-----------|-----------|
|                  |                  |                | X                       | Y         | Z         |
| 1                | 6                | 0              | -1.351911               | 1.266642  | 0.799666  |
| 2                | 6                | 0              | -2.609214               | 0.693895  | 0.887212  |
| 3                | 6                | 0              | -2.924130               | -0.353379 | 0.030315  |
| 4                | 6                | 0              | -2.023157               | -0.828296 | -0.914732 |
| 5                | 6                | 0              | -0.774295               | -0.234964 | -0.997591 |
| 6                | 6                | 0              | -0.407921               | 0.818106  | -0.141321 |
| 7                | 1                | 0              | -1.090179               | 2.062684  | 1.486876  |
| 8                | 1                | 0              | -3.327987               | 1.040763  | 1.617735  |
| 9                | 1                | 0              | -2.301570               | -1.633954 | -1.581257 |
| 10               | 1                | 0              | -0.087937               | -0.573703 | -1.765538 |
| 11               | 6                | 0              | 0.911037                | 1.462461  | -0.230122 |
| 12               | 6                | 0              | 2.101598                | 0.784401  | -0.409076 |
| 13               | 6                | 0              | 0.998603                | 2.905626  | -0.105853 |
| 14               | 1                | 0              | 3.003534                | 1.390029  | -0.466633 |
| 15               | 1                | 0              | 0.024828                | 3.419595  | -0.004743 |
| 16               | 8                | 0              | 2.023838                | 3.572919  | -0.124056 |
| 17               | 7                | 0              | 2.304968                | -0.521384 | -0.499125 |
| 18               | 1                | 0              | 1.524015                | -1.156669 | -0.378760 |
| 19               | 7                | 0              | -4.246993               | -0.974348 | 0.123876  |
| 20               | 8                | 0              | -4.489609               | -1.921545 | -0.600512 |
| 21               | 8                | 0              | -5.041624               | -0.514504 | 0.922476  |
| 22               | 6                | 0              | 3.633624                | -1.122002 | -0.551456 |
| 23               | 6                | 0              | 4.108056                | -1.598007 | 0.817780  |
| 24               | 1                | 0              | 4.319522                | -0.372740 | -0.952822 |
| 25               | 1                | 0              | 3.601311                | -1.958283 | -1.254243 |
| 26               | 6                | 0              | 5.493108                | -2.229119 | 0.732023  |
| 27               | 1                | 0              | 4.120505                | -0.742408 | 1.500294  |
| 28               | 1                | 0              | 3.386878                | -2.319371 | 1.214726  |
| 29               | 1                | 0              | 5.835143                | -2.561429 | 1.714222  |
| 30               | 1                | 0              | 5.488368                | -3.097511 | 0.067428  |
| 31               | 1                | 0              | 6.224529                | -1.514028 | 0.345132  |

## Structure 13b (C<sub>2</sub>H<sub>5</sub>OH)

Energy (Hartrees): -800.687787107

No imaginary frequencies

Standard orientation:

| Center<br>Number | Atomic<br>Number | Atomic<br>Type | Coordinates (Angstroms) |           |           |
|------------------|------------------|----------------|-------------------------|-----------|-----------|
|                  |                  |                | X                       | Y         | Z         |
| 1                | 6                | 0              | -1.352933               | 1.259737  | 0.820330  |
| 2                | 6                | 0              | -2.604469               | 0.673868  | 0.901182  |
| 3                | 6                | 0              | -2.909835               | -0.361867 | 0.026299  |
| 4                | 6                | 0              | -2.008092               | -0.813356 | -0.929539 |
| 5                | 6                | 0              | -0.766423               | -0.205322 | -1.005783 |
| 6                | 6                | 0              | -0.409173               | 0.835808  | -0.131430 |
| 7                | 1                | 0              | -1.095236               | 2.046133  | 1.520048  |
| 8                | 1                | 0              | -3.324339               | 0.999256  | 1.640515  |
| 9                | 1                | 0              | -2.281168               | -1.607862 | -1.611303 |
| 10               | 1                | 0              | -0.078534               | -0.521375 | -1.781841 |
| 11               | 6                | 0              | 0.905246                | 1.492000  | -0.216984 |
| 12               | 6                | 0              | 2.102753                | 0.817173  | -0.393154 |
| 13               | 6                | 0              | 0.980769                | 2.926078  | -0.096697 |
| 14               | 1                | 0              | 3.003542                | 1.422856  | -0.458708 |
| 15               | 1                | 0              | 0.008771                | 3.438623  | 0.006585  |
| 16               | 8                | 0              | 2.007543                | 3.606275  | -0.118688 |
| 17               | 7                | 0              | 2.306404                | -0.485794 | -0.471231 |
| 18               | 1                | 0              | 1.524314                | -1.120842 | -0.351594 |
| 19               | 7                | 0              | -4.223934               | -0.993563 | 0.112039  |
| 20               | 8                | 0              | -4.455575               | -1.949059 | -0.606037 |
| 21               | 8                | 0              | -5.034429               | -0.538444 | 0.897947  |
| 22               | 6                | 0              | 3.633253                | -1.091456 | -0.539849 |
| 23               | 6                | 0              | 4.085780                | -1.644218 | 0.807398  |
| 24               | 1                | 0              | 4.326595                | -0.325846 | -0.893776 |
| 25               | 1                | 0              | 3.605049                | -1.888951 | -1.286672 |
| 26               | 6                | 0              | 5.459554                | -2.296384 | 0.698515  |
| 27               | 1                | 0              | 4.107848                | -0.826221 | 1.534133  |
| 28               | 1                | 0              | 3.349060                | -2.372562 | 1.160549  |
| 29               | 1                | 0              | 5.784680                | -2.689583 | 1.663786  |
| 30               | 1                | 0              | 5.444470                | -3.125118 | -0.014657 |
| 31               | 1                | 0              | 6.208773                | -1.575541 | 0.359779  |

### Structure 13c (vacuum)

Energy (Hartrees):  
No imaginary frequencies

Standard orientation:

| Center<br>Number | Atomic<br>Number | Atomic<br>Type | Coordinates (Angstroms) |           |           |
|------------------|------------------|----------------|-------------------------|-----------|-----------|
|                  |                  |                | X                       | Y         | Z         |
| 1                | 6                | 0              | -1.221786               | 1.185777  | 0.806657  |
| 2                | 6                | 0              | -2.446201               | 0.548693  | 0.931592  |
| 3                | 6                | 0              | -2.767074               | -0.461358 | 0.036267  |
| 4                | 6                | 0              | -1.913989               | -0.841216 | -0.987800 |
| 5                | 6                | 0              | -0.693112               | -0.192226 | -1.101919 |
| 6                | 6                | 0              | -0.321198               | 0.816416  | -0.201812 |
| 7                | 1                | 0              | -0.959019               | 1.984546  | 1.486591  |
| 8                | 1                | 0              | -3.149096               | 0.819884  | 1.707577  |
| 9                | 1                | 0              | -2.216761               | -1.616377 | -1.678773 |
| 10               | 1                | 0              | -0.034204               | -0.443711 | -1.925832 |
| 11               | 6                | 0              | 0.986108                | 1.489408  | -0.319504 |
| 12               | 6                | 0              | 2.160441                | 0.827490  | -0.529805 |
| 13               | 6                | 0              | 1.096433                | 2.937951  | -0.160239 |
| 14               | 1                | 0              | 3.071008                | 1.420835  | -0.599578 |
| 15               | 7                | 0              | 2.361155                | -0.497401 | -0.666303 |
| 16               | 1                | 0              | 1.575596                | -1.106681 | -0.478477 |
| 17               | 8                | 0              | 0.190592                | 3.694097  | 0.103716  |
| 18               | 1                | 0              | 2.125385                | 3.329902  | -0.302790 |
| 19               | 7                | 0              | -4.065523               | -1.149302 | 0.168318  |
| 20               | 8                | 0              | -4.307234               | -2.046434 | -0.611684 |
| 21               | 8                | 0              | -4.810288               | -0.778935 | 1.049718  |
| 22               | 6                | 0              | 3.690554                | -1.086637 | -0.582669 |
| 23               | 6                | 0              | 4.146405                | -1.358803 | 0.849551  |
| 24               | 1                | 0              | 4.387669                | -0.403532 | -1.076994 |
| 25               | 1                | 0              | 3.691622                | -2.013034 | -1.162737 |
| 26               | 6                | 0              | 5.547051                | -1.962985 | 0.886202  |
| 27               | 1                | 0              | 4.119373                | -0.420545 | 1.412432  |
| 28               | 1                | 0              | 3.430064                | -2.033993 | 1.327992  |
| 29               | 1                | 0              | 5.859547                | -2.170541 | 1.910232  |
| 30               | 1                | 0              | 5.583581                | -2.902216 | 0.328555  |
| 31               | 1                | 0              | 6.279453                | -1.282505 | 0.444567  |



## Structure 13c (CHCl<sub>3</sub>)

Energy (Hartrees): -800.687595866

No imaginary frequencies

Standard orientation:

| Center<br>Number | Atomic<br>Number | Atomic<br>Type | Coordinates (Angstroms) |           |           |
|------------------|------------------|----------------|-------------------------|-----------|-----------|
|                  |                  |                | X                       | Y         | Z         |
| 1                | 6                | 0              | 1.258271                | 1.177168  | -0.820490 |
| 2                | 6                | 0              | 2.478289                | 0.530604  | -0.929711 |
| 3                | 6                | 0              | 2.774468                | -0.486391 | -0.031253 |
| 4                | 6                | 0              | 1.897717                | -0.864238 | 0.975472  |
| 5                | 6                | 0              | 0.683125                | -0.202498 | 1.073975  |
| 6                | 6                | 0              | 0.337412                | 0.817927  | 0.175259  |
| 7                | 1                | 0              | 1.012039                | 1.970281  | -1.513864 |
| 8                | 1                | 0              | 3.187931                | 0.801083  | -1.700266 |
| 9                | 1                | 0              | 2.170674                | -1.646761 | 1.670883  |
| 10               | 1                | 0              | 0.008702                | -0.460377 | 1.883056  |
| 11               | 6                | 0              | -0.957431               | 1.515780  | 0.277889  |
| 12               | 6                | 0              | -2.160250               | 0.874603  | 0.466374  |
| 13               | 6                | 0              | -1.037052               | 2.956412  | 0.153289  |
| 14               | 1                | 0              | -3.055121               | 1.491424  | 0.531204  |
| 15               | 7                | 0              | -2.394051               | -0.433063 | 0.569097  |
| 16               | 1                | 0              | -1.624879               | -1.076996 | 0.427969  |
| 17               | 8                | 0              | -0.104847               | 3.718400  | -0.041729 |
| 18               | 1                | 0              | -2.061678               | 3.363295  | 0.259160  |
| 19               | 7                | 0              | 4.061912                | -1.182982 | -0.145493 |
| 20               | 8                | 0              | 4.279110                | -2.110226 | 0.609960  |
| 21               | 8                | 0              | 4.845418                | -0.800009 | -0.991069 |
| 22               | 6                | 0              | -3.738156               | -1.000089 | 0.568291  |
| 23               | 6                | 0              | -4.209007               | -1.395324 | -0.828734 |
| 24               | 1                | 0              | -4.411944               | -0.255712 | 1.000098  |
| 25               | 1                | 0              | -3.742201               | -1.869463 | 1.230506  |
| 26               | 6                | 0              | -5.611906               | -1.991988 | -0.795231 |
| 27               | 1                | 0              | -4.187565               | -0.508785 | -1.470498 |
| 28               | 1                | 0              | -3.501927               | -2.115453 | -1.252439 |
| 29               | 1                | 0              | -5.942839               | -2.271987 | -1.797005 |
| 30               | 1                | 0              | -5.642950               | -2.888985 | -0.170494 |
| 31               | 1                | 0              | -6.333584               | -1.276366 | -0.391621 |

### Structure 13c (DMSO)

Energy (Hartrees): -800.688554241

No imaginary frequencies

Standard orientation:

| Center<br>Number | Atomic<br>Number | Atomic<br>Type | Coordinates (Angstroms) |           |           |
|------------------|------------------|----------------|-------------------------|-----------|-----------|
|                  |                  |                | X                       | Y         | Z         |
| 1                | 6                | 0              | -1.276641               | 1.182922  | 0.817922  |
| 2                | 6                | 0              | -2.494841               | 0.532707  | 0.922360  |
| 3                | 6                | 0              | -2.779031               | -0.495434 | 0.031497  |
| 4                | 6                | 0              | -1.887699               | -0.882981 | -0.959454 |
| 5                | 6                | 0              | -0.674845               | -0.217825 | -1.052718 |
| 6                | 6                | 0              | -0.342424               | 0.816823  | -0.164417 |
| 7                | 1                | 0              | -1.040083               | 1.980779  | 1.509228  |
| 8                | 1                | 0              | -3.210051               | 0.809090  | 1.685466  |
| 9                | 1                | 0              | -2.142808               | -1.676281 | -1.649336 |
| 10               | 1                | 0              | 0.011236                | -0.490674 | -1.846758 |
| 11               | 6                | 0              | 0.948916                | 1.518842  | -0.264161 |
| 12               | 6                | 0              | 2.159907                | 0.880347  | -0.444461 |
| 13               | 6                | 0              | 1.024262                | 2.957712  | -0.159176 |
| 14               | 1                | 0              | 3.049895                | 1.503122  | -0.515073 |
| 15               | 7                | 0              | 2.401183                | -0.421935 | -0.530910 |
| 16               | 1                | 0              | 1.639176                | -1.077613 | -0.399589 |
| 17               | 8                | 0              | 0.089305                | 3.727166  | 0.009898  |
| 18               | 1                | 0              | 2.050191                | 3.361495  | -0.259527 |
| 19               | 7                | 0              | -4.066465               | -1.189429 | 0.138051  |
| 20               | 8                | 0              | -4.273615               | -2.131151 | -0.603494 |
| 21               | 8                | 0              | -4.866008               | -0.790873 | 0.963535  |
| 22               | 6                | 0              | 3.748444                | -0.981657 | -0.561069 |
| 23               | 6                | 0              | 4.234722                | -1.396216 | 0.823981  |
| 24               | 1                | 0              | 4.411958                | -0.225995 | -0.987664 |
| 25               | 1                | 0              | 3.744046                | -1.841323 | -1.235350 |
| 26               | 6                | 0              | 5.638392                | -1.988530 | 0.763930  |
| 27               | 1                | 0              | 4.219537                | -0.518118 | 1.477196  |
| 28               | 1                | 0              | 3.533529                | -2.124207 | 1.243764  |
| 29               | 1                | 0              | 5.984126                | -2.281048 | 1.757402  |
| 30               | 1                | 0              | 5.662427                | -2.876342 | 0.125952  |
| 31               | 1                | 0              | 6.351366                | -1.264733 | 0.359396  |

## Structure 13c (C<sub>2</sub>H<sub>5</sub>OH)

Energy (Hartrees): -800.691088888

No imaginary frequencies

Standard orientation:

| Center<br>Number | Atomic<br>Number | Atomic<br>Type | Coordinates (Angstroms) |           |           |
|------------------|------------------|----------------|-------------------------|-----------|-----------|
|                  |                  |                | X                       | Y         | Z         |
| 1                | 6                | 0              | -1.256036               | 1.150967  | 0.853250  |
| 2                | 6                | 0              | -2.475144               | 0.502367  | 0.954126  |
| 3                | 6                | 0              | -2.773387               | -0.494463 | 0.032865  |
| 4                | 6                | 0              | -1.898316               | -0.854033 | -0.983034 |
| 5                | 6                | 0              | -0.685932               | -0.188131 | -1.073078 |
| 6                | 6                | 0              | -0.341187               | 0.816945  | -0.157163 |
| 7                | 1                | 0              | -1.003820               | 1.920209  | 1.572133  |
| 8                | 1                | 0              | -3.176855               | 0.754101  | 1.738295  |
| 9                | 1                | 0              | -2.167084               | -1.624096 | -1.694111 |
| 10               | 1                | 0              | -0.011105               | -0.434596 | -1.885263 |
| 11               | 6                | 0              | 0.949197                | 1.524120  | -0.255306 |
| 12               | 6                | 0              | 2.163520                | 0.886001  | -0.436701 |
| 13               | 6                | 0              | 1.021004                | 2.954289  | -0.153879 |
| 14               | 1                | 0              | 3.054693                | 1.507915  | -0.500097 |
| 15               | 7                | 0              | 2.398932                | -0.413447 | -0.531691 |
| 16               | 1                | 0              | 1.631496                | -1.066469 | -0.416947 |
| 17               | 8                | 0              | 0.074099                | 3.724917  | 0.001521  |
| 18               | 1                | 0              | 2.041198                | 3.368870  | -0.242139 |
| 19               | 7                | 0              | -4.058542               | -1.186982 | 0.133550  |
| 20               | 8                | 0              | -4.274710               | -2.117756 | -0.620144 |
| 21               | 8                | 0              | -4.857560               | -0.802859 | 0.966809  |
| 22               | 6                | 0              | 3.744761                | -0.978965 | -0.564472 |
| 23               | 6                | 0              | 4.228549                | -1.403189 | 0.818059  |
| 24               | 1                | 0              | 4.411186                | -0.223591 | -0.987249 |
| 25               | 1                | 0              | 3.736069                | -1.834035 | -1.244592 |
| 26               | 6                | 0              | 5.631319                | -1.997137 | 0.754864  |
| 27               | 1                | 0              | 4.214313                | -0.529036 | 1.476983  |
| 28               | 1                | 0              | 3.526228                | -2.133206 | 1.232755  |
| 29               | 1                | 0              | 5.975454                | -2.296063 | 1.747066  |
| 30               | 1                | 0              | 5.654631                | -2.881802 | 0.112228  |
| 31               | 1                | 0              | 6.346148                | -1.272242 | 0.355243  |

### Structure 13d (vacuum)

Energy (Hartrees): -800.654545454

No imaginary frequencies

Standard orientation:

| Center<br>Number | Atomic<br>Number | Atomic<br>Type | Coordinates (Angstroms) |           |           |
|------------------|------------------|----------------|-------------------------|-----------|-----------|
|                  |                  |                | X                       | Y         | Z         |
| 1                | 6                | 0              | -1.366685               | 1.149685  | 0.709385  |
| 2                | 6                | 0              | -2.659529               | 0.667239  | 0.832810  |
| 3                | 6                | 0              | -3.053402               | -0.404969 | 0.044567  |
| 4                | 6                | 0              | -2.199768               | -0.995751 | -0.873218 |
| 5                | 6                | 0              | -0.912552               | -0.495263 | -0.992267 |
| 6                | 6                | 0              | -0.464811               | 0.566870  | -0.193650 |
| 7                | 1                | 0              | -1.050711               | 1.987119  | 1.315439  |
| 8                | 1                | 0              | -3.360852               | 1.103032  | 1.531560  |
| 9                | 1                | 0              | -2.551698               | -1.814129 | -1.486310 |
| 10               | 1                | 0              | -0.251943               | -0.917971 | -1.740389 |
| 11               | 6                | 0              | 0.929454                | 1.044294  | -0.298259 |
| 12               | 6                | 0              | 1.931170                | 0.133083  | -0.501333 |
| 13               | 6                | 0              | 1.240526                | 2.463325  | -0.154866 |
| 14               | 1                | 0              | 1.669247                | -0.923772 | -0.479516 |
| 15               | 7                | 0              | 3.240514                | 0.338231  | -0.751931 |
| 16               | 1                | 0              | 3.592743                | 1.282579  | -0.775851 |
| 17               | 1                | 0              | 2.319591                | 2.719944  | -0.184985 |
| 18               | 8                | 0              | 0.438044                | 3.354684  | 0.004961  |
| 19               | 7                | 0              | -4.425544               | -0.924719 | 0.177540  |
| 20               | 8                | 0              | -4.739357               | -1.868654 | -0.517329 |
| 21               | 8                | 0              | -5.158582               | -0.381280 | 0.976092  |
| 22               | 6                | 0              | 4.222074                | -0.726625 | -0.596595 |
| 23               | 6                | 0              | 4.656336                | -0.952244 | 0.850373  |
| 24               | 1                | 0              | 5.086547                | -0.482512 | -1.218983 |
| 25               | 1                | 0              | 3.785914                | -1.644232 | -1.004112 |
| 26               | 6                | 0              | 5.684965                | -2.074081 | 0.957176  |
| 27               | 1                | 0              | 5.068433                | -0.019804 | 1.248638  |
| 28               | 1                | 0              | 3.771100                | -1.187171 | 1.449890  |
| 29               | 1                | 0              | 5.987928                | -2.232944 | 1.992651  |
| 30               | 1                | 0              | 5.279325                | -3.016125 | 0.579643  |
| 31               | 1                | 0              | 6.582075                | -1.839966 | 0.378521  |

## Structure 13d (CHCl<sub>3</sub>)

Energy (Hartrees): -800.681581534

No imaginary frequencies

Standard orientation:

| Center<br>Number | Atomic<br>Number | Atomic<br>Type | Coordinates (Angstroms) |           |           |
|------------------|------------------|----------------|-------------------------|-----------|-----------|
|                  |                  |                | X                       | Y         | Z         |
| 1                | 6                | 0              | -1.407975               | 1.185643  | 0.662538  |
| 2                | 6                | 0              | -2.700877               | 0.705509  | 0.784106  |
| 3                | 6                | 0              | -3.074127               | -0.411411 | 0.046196  |
| 4                | 6                | 0              | -2.192849               | -1.049109 | -0.815845 |
| 5                | 6                | 0              | -0.906232               | -0.550179 | -0.933339 |
| 6                | 6                | 0              | -0.478788               | 0.561709  | -0.187962 |
| 7                | 1                | 0              | -1.109986               | 2.048586  | 1.241572  |
| 8                | 1                | 0              | -3.410719               | 1.179363  | 1.449120  |
| 9                | 1                | 0              | -2.515420               | -1.905421 | -1.393100 |
| 10               | 1                | 0              | -0.228053               | -1.018636 | -1.636677 |
| 11               | 6                | 0              | 0.911352                | 1.043322  | -0.286287 |
| 12               | 6                | 0              | 1.925837                | 0.120403  | -0.462138 |
| 13               | 6                | 0              | 1.225301                | 2.451842  | -0.165376 |
| 14               | 1                | 0              | 1.666714                | -0.936124 | -0.419079 |
| 15               | 7                | 0              | 3.223333                | 0.325487  | -0.689646 |
| 16               | 1                | 0              | 3.581289                | 1.269168  | -0.753448 |
| 17               | 1                | 0              | 2.302939                | 2.699757  | -0.165037 |
| 18               | 8                | 0              | 0.422216                | 3.363964  | -0.058335 |
| 19               | 7                | 0              | -4.437910               | -0.929034 | 0.177982  |
| 20               | 8                | 0              | -4.740090               | -1.917150 | -0.463746 |
| 21               | 8                | 0              | -5.202354               | -0.349117 | 0.924640  |
| 22               | 6                | 0              | 4.212505                | -0.742685 | -0.584535 |
| 23               | 6                | 0              | 4.740790                | -0.918859 | 0.836373  |
| 24               | 1                | 0              | 5.030712                | -0.510075 | -1.269675 |
| 25               | 1                | 0              | 3.743384                | -1.667549 | -0.932505 |
| 26               | 6                | 0              | 5.799646                | -2.013450 | 0.905424  |
| 27               | 1                | 0              | 5.156892                | 0.032594  | 1.182083  |
| 28               | 1                | 0              | 3.899749                | -1.158922 | 1.494830  |
| 29               | 1                | 0              | 6.168675                | -2.138684 | 1.924991  |
| 30               | 1                | 0              | 5.395207                | -2.974143 | 0.575235  |
| 31               | 1                | 0              | 6.654985                | -1.773071 | 0.267948  |

## Structure 13d (DMSO)

Energy (Hartrees): -800.683028097

No imaginary frequencies

Standard orientation:

| Center<br>Number | Atomic<br>Number | Atomic<br>Type | Coordinates (Angstroms) |           |           |
|------------------|------------------|----------------|-------------------------|-----------|-----------|
|                  |                  |                | X                       | Y         | Z         |
| 1                | 6                | 0              | -1.416147               | 1.187780  | 0.662409  |
| 2                | 6                | 0              | -2.709059               | 0.707606  | 0.780056  |
| 3                | 6                | 0              | -3.077185               | -0.416259 | 0.048475  |
| 4                | 6                | 0              | -2.187180               | -1.061776 | -0.800136 |
| 5                | 6                | 0              | -0.900705               | -0.562767 | -0.914276 |
| 6                | 6                | 0              | -0.479621               | 0.559450  | -0.178734 |
| 7                | 1                | 0              | -1.121454               | 2.052459  | 1.240855  |
| 8                | 1                | 0              | -3.420896               | 1.186869  | 1.439295  |
| 9                | 1                | 0              | -2.500598               | -1.924745 | -1.372682 |
| 10               | 1                | 0              | -0.216668               | -1.041213 | -1.605293 |
| 11               | 6                | 0              | 0.906076                | 1.046298  | -0.276863 |
| 12               | 6                | 0              | 1.924356                | 0.118763  | -0.447103 |
| 13               | 6                | 0              | 1.216015                | 2.454283  | -0.173013 |
| 14               | 1                | 0              | 1.665102                | -0.937511 | -0.399359 |
| 15               | 7                | 0              | 3.217404                | 0.324473  | -0.666405 |
| 16               | 1                | 0              | 3.578659                | 1.268175  | -0.731110 |
| 17               | 1                | 0              | 2.292840                | 2.702363  | -0.176842 |
| 18               | 8                | 0              | 0.410500                | 3.369983  | -0.082783 |
| 19               | 7                | 0              | -4.440217               | -0.931230 | 0.173143  |
| 20               | 8                | 0              | -4.733744               | -1.937457 | -0.446238 |
| 21               | 8                | 0              | -5.218715               | -0.331899 | 0.892076  |
| 22               | 6                | 0              | 4.206551                | -0.745949 | -0.579787 |
| 23               | 6                | 0              | 4.771354                | -0.902900 | 0.828568  |
| 24               | 1                | 0              | 5.006502                | -0.521009 | -1.288428 |
| 25               | 1                | 0              | 3.723482                | -1.672624 | -0.900839 |
| 26               | 6                | 0              | 5.822312                | -2.005396 | 0.883168  |
| 27               | 1                | 0              | 5.203843                | 0.050804  | 1.146820  |
| 28               | 1                | 0              | 3.946112                | -1.128233 | 1.511775  |
| 29               | 1                | 0              | 6.220108                | -2.120344 | 1.893445  |
| 30               | 1                | 0              | 5.397897                | -2.965843 | 0.577660  |
| 31               | 1                | 0              | 6.659828                | -1.781655 | 0.216515  |

## Structure 13d (C<sub>2</sub>H<sub>5</sub>OH)

Energy (Hartrees): -800.685275572

No imaginary frequencies

Standard orientation:

| Center<br>Number | Atomic<br>Number | Atomic<br>Type | Coordinates (Angstroms) |           |           |
|------------------|------------------|----------------|-------------------------|-----------|-----------|
|                  |                  |                | X                       | Y         | Z         |
| 1                | 6                | 0              | -1.419980               | 1.176840  | 0.677090  |
| 2                | 6                | 0              | -2.716350               | 0.707285  | 0.795472  |
| 3                | 6                | 0              | -3.093679               | -0.410449 | 0.058580  |
| 4                | 6                | 0              | -2.210692               | -1.063035 | -0.792513 |
| 5                | 6                | 0              | -0.920548               | -0.574661 | -0.905333 |
| 6                | 6                | 0              | -0.491950               | 0.543580  | -0.169010 |
| 7                | 1                | 0              | -1.117002               | 2.033654  | 1.263602  |
| 8                | 1                | 0              | -3.422286               | 1.189953  | 1.458541  |
| 9                | 1                | 0              | -2.531010               | -1.922729 | -1.366328 |
| 10               | 1                | 0              | -0.239078               | -1.056591 | -1.596613 |
| 11               | 6                | 0              | 0.897355                | 1.019944  | -0.275699 |
| 12               | 6                | 0              | 1.911023                | 0.078704  | -0.426077 |
| 13               | 6                | 0              | 1.215696                | 2.419474  | -0.206724 |
| 14               | 1                | 0              | 1.645560                | -0.973287 | -0.334466 |
| 15               | 7                | 0              | 3.197948                | 0.271244  | -0.672814 |
| 16               | 1                | 0              | 3.558114                | 1.211143  | -0.788731 |
| 17               | 1                | 0              | 2.290790                | 2.666938  | -0.212989 |
| 18               | 8                | 0              | 0.410558                | 3.346697  | -0.138802 |
| 19               | 7                | 0              | -4.458218               | -0.911292 | 0.179209  |
| 20               | 8                | 0              | -4.774345               | -1.893775 | -0.467952 |
| 21               | 8                | 0              | -5.227960               | -0.329074 | 0.922352  |
| 22               | 6                | 0              | 4.192343                | -0.793046 | -0.563723 |
| 23               | 6                | 0              | 4.861570                | -0.819904 | 0.806297  |
| 24               | 1                | 0              | 4.936833                | -0.639673 | -1.348102 |
| 25               | 1                | 0              | 3.685818                | -1.740720 | -0.761884 |
| 26               | 6                | 0              | 5.908484                | -1.924709 | 0.888884  |
| 27               | 1                | 0              | 5.324189                | 0.154257  | 0.993790  |
| 28               | 1                | 0              | 4.090948                | -0.965649 | 1.569974  |
| 29               | 1                | 0              | 6.395076                | -1.931167 | 1.866297  |
| 30               | 1                | 0              | 5.454409                | -2.907579 | 0.734249  |
| 31               | 1                | 0              | 6.683865                | -1.789127 | 0.129632  |

## Structure 13e (vacuum)

Energy (Hartrees): -800.651732725

No imaginary frequencies

Standard orientation:

| Center<br>Number | Atomic<br>Number | Atomic<br>Type | Coordinates (Angstroms) |           |           |
|------------------|------------------|----------------|-------------------------|-----------|-----------|
|                  |                  |                | X                       | Y         | Z         |
| 1                | 6                | 0              | -2.787630               | 1.043729  | -0.314022 |
| 2                | 6                | 0              | -1.421252               | 1.252107  | -0.399971 |
| 3                | 6                | 0              | -0.515710               | 0.215882  | -0.125793 |
| 4                | 6                | 0              | -1.027087               | -1.028248 | 0.268546  |
| 5                | 6                | 0              | -2.392771               | -1.255603 | 0.352507  |
| 6                | 6                | 0              | -3.252418               | -0.211125 | 0.055385  |
| 7                | 1                | 0              | -3.494378               | 1.833067  | -0.531460 |
| 8                | 1                | 0              | -1.049543               | 2.227085  | -0.681887 |
| 9                | 1                | 0              | -0.344286               | -1.823643 | 0.543754  |
| 10               | 1                | 0              | -2.793540               | -2.212015 | 0.659607  |
| 11               | 6                | 0              | 0.945330                | 0.413546  | -0.265777 |
| 12               | 6                | 0              | 1.676926                | -0.610125 | -0.810036 |
| 13               | 1                | 0              | 1.115423                | -1.431534 | -1.249349 |
| 14               | 6                | 0              | 1.532882                | 1.709467  | 0.081422  |
| 15               | 1                | 0              | 2.584215                | 1.856032  | -0.216688 |
| 16               | 1                | 0              | 3.305547                | -1.607789 | -1.417396 |
| 17               | 7                | 0              | 3.010258                | -0.798261 | -0.894013 |
| 18               | 8                | 0              | 0.938011                | 2.621454  | 0.612660  |
| 19               | 7                | 0              | -4.705628               | -0.437857 | 0.147520  |
| 20               | 8                | 0              | -5.438235               | 0.487905  | -0.128831 |
| 21               | 8                | 0              | -5.082728               | -1.538957 | 0.490800  |
| 22               | 6                | 0              | 4.060946                | -0.117537 | -0.151889 |
| 23               | 6                | 0              | 5.245932                | -1.049320 | 0.069069  |
| 24               | 1                | 0              | 3.644075                | 0.199602  | 0.810225  |
| 25               | 1                | 0              | 4.395277                | 0.782043  | -0.680419 |
| 26               | 6                | 0              | 6.376870                | -0.346653 | 0.814865  |
| 27               | 1                | 0              | 4.909919                | -1.926760 | 0.629537  |
| 28               | 1                | 0              | 5.608766                | -1.404722 | -0.902002 |
| 29               | 1                | 0              | 7.218737                | -1.021228 | 0.973450  |
| 30               | 1                | 0              | 6.739058                | 0.517191  | 0.252812  |
| 31               | 1                | 0              | 6.039819                | 0.005563  | 1.792397  |



## Structure 13e (CHCl<sub>3</sub>)

Energy (Hartrees): -800.678578641

No imaginary frequencies

Standard orientation:

| Center<br>Number | Atomic<br>Number | Atomic<br>Type | Coordinates (Angstroms) |           |           |
|------------------|------------------|----------------|-------------------------|-----------|-----------|
|                  |                  |                | X                       | Y         | Z         |
| 1                | 6                | 0              | -2.787987               | 1.052484  | -0.298484 |
| 2                | 6                | 0              | -1.422287               | 1.256303  | -0.390965 |
| 3                | 6                | 0              | -0.513663               | 0.214184  | -0.136531 |
| 4                | 6                | 0              | -1.029402               | -1.036476 | 0.239911  |
| 5                | 6                | 0              | -2.394188               | -1.260244 | 0.330235  |
| 6                | 6                | 0              | -3.255270               | -0.207249 | 0.057803  |
| 7                | 1                | 0              | -3.486309               | 1.852418  | -0.505823 |
| 8                | 1                | 0              | -1.054251               | 2.232406  | -0.674597 |
| 9                | 1                | 0              | -0.350016               | -1.842282 | 0.492118  |
| 10               | 1                | 0              | -2.785694               | -2.224665 | 0.625206  |
| 11               | 6                | 0              | 0.944400                | 0.410885  | -0.277366 |
| 12               | 6                | 0              | 1.681991                | -0.635573 | -0.800572 |
| 13               | 1                | 0              | 1.123546                | -1.457423 | -1.242764 |
| 14               | 6                | 0              | 1.537408                | 1.697571  | 0.043238  |
| 15               | 1                | 0              | 2.582196                | 1.838837  | -0.271356 |
| 16               | 1                | 0              | 3.297431                | -1.655596 | -1.364445 |
| 17               | 7                | 0              | 3.000756                | -0.834111 | -0.854502 |
| 18               | 8                | 0              | 0.957175                | 2.627359  | 0.581880  |
| 19               | 7                | 0              | -4.700438               | -0.428907 | 0.157100  |
| 20               | 8                | 0              | -5.441329               | 0.504659  | -0.082198 |
| 21               | 8                | 0              | -5.089801               | -1.537480 | 0.471268  |
| 22               | 6                | 0              | 4.058929                | -0.119967 | -0.149218 |
| 23               | 6                | 0              | 5.243591                | -1.044692 | 0.095182  |
| 24               | 1                | 0              | 3.651144                | 0.235226  | 0.803007  |
| 25               | 1                | 0              | 4.382706                | 0.754690  | -0.722335 |
| 26               | 6                | 0              | 6.374076                | -0.315530 | 0.813309  |
| 27               | 1                | 0              | 4.911039                | -1.902524 | 0.687310  |
| 28               | 1                | 0              | 5.600559                | -1.430422 | -0.865967 |
| 29               | 1                | 0              | 7.219625                | -0.983099 | 0.987863  |
| 30               | 1                | 0              | 6.731184                | 0.533024  | 0.224063  |
| 31               | 1                | 0              | 6.040649                | 0.064056  | 1.782690  |

## Structure 13e (DMSO)

Energy (Hartrees): -800.679848019

No imaginary frequencies

Standard orientation:

| Center<br>Number | Atomic<br>Number | Atomic<br>Type | Coordinates (Angstroms) |           |           |
|------------------|------------------|----------------|-------------------------|-----------|-----------|
|                  |                  |                | X                       | Y         | Z         |
| 1                | 6                | 0              | -2.786053               | 1.050034  | -0.316104 |
| 2                | 6                | 0              | -1.419483               | 1.247265  | -0.404669 |
| 3                | 6                | 0              | -0.513714               | 0.205511  | -0.133488 |
| 4                | 6                | 0              | -1.036374               | -1.041389 | 0.249225  |
| 5                | 6                | 0              | -2.402306               | -1.258310 | 0.336192  |
| 6                | 6                | 0              | -3.260075               | -0.204414 | 0.052903  |
| 7                | 1                | 0              | -3.478065               | 1.851489  | -0.538641 |
| 8                | 1                | 0              | -1.047419               | 2.217554  | -0.702895 |
| 9                | 1                | 0              | -0.362588               | -1.850840 | 0.505107  |
| 10               | 1                | 0              | -2.794420               | -2.220690 | 0.637282  |
| 11               | 6                | 0              | 0.943432                | 0.400236  | -0.266352 |
| 12               | 6                | 0              | 1.683475                | -0.660557 | -0.769189 |
| 13               | 1                | 0              | 1.125288                | -1.489216 | -1.198474 |
| 14               | 6                | 0              | 1.534950                | 1.686989  | 0.044641  |
| 15               | 1                | 0              | 2.581056                | 1.823186  | -0.265283 |
| 16               | 1                | 0              | 3.290969                | -1.697410 | -1.307413 |
| 17               | 7                | 0              | 2.996668                | -0.862286 | -0.816026 |
| 18               | 8                | 0              | 0.955448                | 2.624257  | 0.576922  |
| 19               | 7                | 0              | -4.704439               | -0.417648 | 0.152537  |
| 20               | 8                | 0              | -5.441719               | 0.523357  | -0.076691 |
| 21               | 8                | 0              | -5.102409               | -1.526616 | 0.458604  |
| 22               | 6                | 0              | 4.060271                | -0.123535 | -0.144903 |
| 23               | 6                | 0              | 5.256378                | -1.033518 | 0.094559  |
| 24               | 1                | 0              | 3.667367                | 0.248210  | 0.807328  |
| 25               | 1                | 0              | 4.364447                | 0.740745  | -0.743719 |
| 26               | 6                | 0              | 6.393554                | -0.278243 | 0.772684  |
| 27               | 1                | 0              | 4.943120                | -1.881026 | 0.711555  |
| 28               | 1                | 0              | 5.595419                | -1.437047 | -0.865418 |
| 29               | 1                | 0              | 7.248809                | -0.934355 | 0.945205  |
| 30               | 1                | 0              | 6.730004                | 0.559777  | 0.156396  |
| 31               | 1                | 0              | 6.075513                | 0.120761  | 1.739709  |

## Structure 13e (C<sub>2</sub>H<sub>5</sub>OH)

Energy (Hartrees): -800.682336342

No imaginary frequencies

Standard orientation:

| Center<br>Number | Atomic<br>Number | Atomic<br>Type | Coordinates (Angstroms) |           |           |
|------------------|------------------|----------------|-------------------------|-----------|-----------|
|                  |                  |                | X                       | Y         | Z         |
| 1                | 6                | 0              | -2.788155               | 1.038859  | -0.365208 |
| 2                | 6                | 0              | -1.421635               | 1.236746  | -0.450630 |
| 3                | 6                | 0              | -0.517010               | 0.208059  | -0.134038 |
| 4                | 6                | 0              | -1.035417               | -1.028698 | 0.282384  |
| 5                | 6                | 0              | -2.400871               | -1.247486 | 0.368163  |
| 6                | 6                | 0              | -3.258220               | -0.204474 | 0.045138  |
| 7                | 1                | 0              | -3.480639               | 1.829675  | -0.621785 |
| 8                | 1                | 0              | -1.050635               | 2.195707  | -0.787141 |
| 9                | 1                | 0              | -0.358541               | -1.826579 | 0.565728  |
| 10               | 1                | 0              | -2.791639               | -2.201226 | 0.697522  |
| 11               | 6                | 0              | 0.942524                | 0.404701  | -0.254410 |
| 12               | 6                | 0              | 1.684123                | -0.652656 | -0.768857 |
| 13               | 1                | 0              | 1.123242                | -1.470714 | -1.214652 |
| 14               | 6                | 0              | 1.527616                | 1.674715  | 0.094398  |
| 15               | 1                | 0              | 2.580393                | 1.821404  | -0.178938 |
| 16               | 1                | 0              | 3.286163                | -1.693775 | -1.307658 |
| 17               | 7                | 0              | 2.993940                | -0.860905 | -0.810681 |
| 18               | 8                | 0              | 0.931331                | 2.606142  | 0.634886  |
| 19               | 7                | 0              | -4.699103               | -0.418036 | 0.145452  |
| 20               | 8                | 0              | -5.442733               | 0.505879  | -0.130178 |
| 21               | 8                | 0              | -5.099819               | -1.512151 | 0.499627  |
| 22               | 6                | 0              | 4.059683                | -0.124480 | -0.139242 |
| 23               | 6                | 0              | 5.270575                | -1.024155 | 0.058807  |
| 24               | 1                | 0              | 3.677200                | 0.221341  | 0.827017  |
| 25               | 1                | 0              | 4.342395                | 0.755645  | -0.725387 |
| 26               | 6                | 0              | 6.407212                | -0.272569 | 0.742242  |
| 27               | 1                | 0              | 4.978234                | -1.892437 | 0.657045  |
| 28               | 1                | 0              | 5.601528                | -1.396443 | -0.916535 |
| 29               | 1                | 0              | 7.273339                | -0.921885 | 0.883898  |
| 30               | 1                | 0              | 6.724267                | 0.587067  | 0.145585  |
| 31               | 1                | 0              | 6.098058                | 0.094465  | 1.724732  |

### Structure 13f (vacuum)

Energy (Hartrees): -800.653622720

No imaginary frequencies

Standard orientation:

| Center<br>Number | Atomic<br>Number | Atomic<br>Type | Coordinates (Angstroms) |           |           |
|------------------|------------------|----------------|-------------------------|-----------|-----------|
|                  |                  |                | X                       | Y         | Z         |
| 1                | 6                | 0              | -2.842564               | 1.133914  | -0.076829 |
| 2                | 6                | 0              | -1.474130               | 1.323846  | -0.175477 |
| 3                | 6                | 0              | -0.579560               | 0.242835  | -0.100488 |
| 4                | 6                | 0              | -1.113363               | -1.043668 | 0.078814  |
| 5                | 6                | 0              | -2.480796               | -1.254396 | 0.155011  |
| 6                | 6                | 0              | -3.325562               | -0.157294 | 0.081023  |
| 7                | 1                | 0              | -3.536646               | 1.961054  | -0.140405 |
| 8                | 1                | 0              | -1.095159               | 2.324169  | -0.346592 |
| 9                | 1                | 0              | -0.442027               | -1.886798 | 0.191499  |
| 10               | 1                | 0              | -2.898263               | -2.242877 | 0.292166  |
| 11               | 6                | 0              | 0.875242                | 0.455127  | -0.214609 |
| 12               | 6                | 0              | 1.613357                | -0.467879 | -0.920504 |
| 13               | 1                | 0              | 1.063299                | -1.188737 | -1.522712 |
| 14               | 6                | 0              | 1.420548                | 1.713284  | 0.294001  |
| 15               | 1                | 0              | 0.760260                | 2.241513  | 1.008300  |
| 16               | 1                | 0              | 3.271274                | -1.327338 | -1.631215 |
| 17               | 7                | 0              | 2.939441                | -0.639760 | -0.971604 |
| 18               | 8                | 0              | 2.475271                | 2.218534  | -0.033081 |
| 19               | 7                | 0              | -4.779611               | -0.369852 | 0.176414  |
| 20               | 8                | 0              | -5.494976               | 0.608399  | 0.133360  |
| 21               | 8                | 0              | -5.174669               | -1.511173 | 0.291299  |
| 22               | 6                | 0              | 3.932268                | -0.144950 | -0.025864 |
| 23               | 6                | 0              | 5.112550                | -1.105530 | 0.039056  |
| 24               | 1                | 0              | 3.447069                | -0.065966 | 0.952442  |
| 25               | 1                | 0              | 4.253437                | 0.861714  | -0.300643 |
| 26               | 6                | 0              | 6.184753                | -0.598904 | 0.999707  |
| 27               | 1                | 0              | 4.762727                | -2.094187 | 0.352649  |
| 28               | 1                | 0              | 5.541242                | -1.216888 | -0.963679 |
| 29               | 1                | 0              | 7.029901                | -1.286909 | 1.043904  |
| 30               | 1                | 0              | 6.559181                | 0.377475  | 0.684647  |
| 31               | 1                | 0              | 5.783425                | -0.493321 | 2.010291  |

## Structure 13f (CHCl<sub>3</sub>)

Energy (Hartrees): -800.678204301

No imaginary frequencies

Standard orientation:

| Center<br>Number | Atomic<br>Number | Atomic<br>Type | Coordinates (Angstroms) |           |           |
|------------------|------------------|----------------|-------------------------|-----------|-----------|
|                  |                  |                | X                       | Y         | Z         |
| 1                | 6                | 0              | -2.833061               | 1.140457  | -0.004556 |
| 2                | 6                | 0              | -1.467877               | 1.335023  | -0.121652 |
| 3                | 6                | 0              | -0.570246               | 0.250564  | -0.126065 |
| 4                | 6                | 0              | -1.104976               | -1.046141 | -0.012349 |
| 5                | 6                | 0              | -2.469504               | -1.259804 | 0.080994  |
| 6                | 6                | 0              | -3.316513               | -0.158842 | 0.090118  |
| 7                | 1                | 0              | -3.518697               | 1.977352  | -0.008253 |
| 8                | 1                | 0              | -1.096187               | 2.345087  | -0.244075 |
| 9                | 1                | 0              | -0.437752               | -1.898952 | 0.031075  |
| 10               | 1                | 0              | -2.875082               | -2.258960 | 0.168997  |
| 11               | 6                | 0              | 0.879891                | 0.467903  | -0.251800 |
| 12               | 6                | 0              | 1.625538                | -0.465842 | -0.954906 |
| 13               | 1                | 0              | 1.087870                | -1.179628 | -1.575687 |
| 14               | 6                | 0              | 1.424852                | 1.725312  | 0.234421  |
| 15               | 1                | 0              | 0.789638                | 2.254052  | 0.968178  |
| 16               | 1                | 0              | 3.283501                | -1.339918 | -1.625257 |
| 17               | 7                | 0              | 2.942056                | -0.645504 | -0.973089 |
| 18               | 8                | 0              | 2.470531                | 2.243032  | -0.127130 |
| 19               | 7                | 0              | -4.760105               | -0.374344 | 0.201590  |
| 20               | 8                | 0              | -5.486043               | 0.601017  | 0.213380  |
| 21               | 8                | 0              | -5.165306               | -1.518832 | 0.275535  |
| 22               | 6                | 0              | 3.922084                | -0.142843 | -0.017657 |
| 23               | 6                | 0              | 5.076430                | -1.128189 | 0.108731  |
| 24               | 1                | 0              | 3.415517                | -0.018584 | 0.944501  |
| 25               | 1                | 0              | 4.278943                | 0.843637  | -0.322284 |
| 26               | 6                | 0              | 6.135043                | -0.612219 | 1.077700  |
| 27               | 1                | 0              | 4.693475                | -2.095191 | 0.449562  |
| 28               | 1                | 0              | 5.523739                | -1.284936 | -0.879113 |
| 29               | 1                | 0              | 6.959292                | -1.321736 | 1.170709  |
| 30               | 1                | 0              | 6.546991                | 0.340785  | 0.736175  |
| 31               | 1                | 0              | 5.711682                | -0.458073 | 2.073802  |

## Structure 13f (DMSO)

Energy (Hartrees): -800.678318453

No imaginary frequencies

Standard orientation:

| Center<br>Number | Atomic<br>Number | Atomic<br>Type | Coordinates (Angstroms) |           |           |
|------------------|------------------|----------------|-------------------------|-----------|-----------|
|                  |                  |                | X                       | Y         | Z         |
| 1                | 6                | 0              | -2.829175               | 1.141759  | 0.010456  |
| 2                | 6                | 0              | -1.465115               | 1.337851  | -0.112644 |
| 3                | 6                | 0              | -0.565852               | 0.253345  | -0.134632 |
| 4                | 6                | 0              | -1.102040               | -1.045147 | -0.035036 |
| 5                | 6                | 0              | -2.465756               | -1.259218 | 0.062769  |
| 6                | 6                | 0              | -3.314081               | -0.158579 | 0.091831  |
| 7                | 1                | 0              | -3.511323               | 1.981484  | 0.019373  |
| 8                | 1                | 0              | -1.097718               | 2.350435  | -0.226588 |
| 9                | 1                | 0              | -0.437661               | -1.900792 | -0.007370 |
| 10               | 1                | 0              | -2.865889               | -2.261529 | 0.139896  |
| 11               | 6                | 0              | 0.882242                | 0.469882  | -0.265033 |
| 12               | 6                | 0              | 1.627365                | -0.477776 | -0.957225 |
| 13               | 1                | 0              | 1.091699                | -1.196160 | -1.574113 |
| 14               | 6                | 0              | 1.427741                | 1.732036  | 0.204190  |
| 15               | 1                | 0              | 0.797194                | 2.265190  | 0.938618  |
| 16               | 1                | 0              | 3.280931                | -1.373803 | -1.600599 |
| 17               | 7                | 0              | 2.939773                | -0.662878 | -0.964493 |
| 18               | 8                | 0              | 2.469123                | 2.252666  | -0.169729 |
| 19               | 7                | 0              | -4.754703               | -0.373695 | 0.210860  |
| 20               | 8                | 0              | -5.479542               | 0.603006  | 0.267164  |
| 21               | 8                | 0              | -5.164943               | -1.519642 | 0.247078  |
| 22               | 6                | 0              | 3.916186                | -0.148040 | -0.012447 |
| 23               | 6                | 0              | 5.068885                | -1.132323 | 0.133276  |
| 24               | 1                | 0              | 3.406244                | -0.008377 | 0.945955  |
| 25               | 1                | 0              | 4.277061                | 0.832385  | -0.331732 |
| 26               | 6                | 0              | 6.119437                | -0.601744 | 1.102237  |
| 27               | 1                | 0              | 4.682721                | -2.093963 | 0.484802  |
| 28               | 1                | 0              | 5.520065                | -1.302638 | -0.850191 |
| 29               | 1                | 0              | 6.943310                | -1.309575 | 1.212445  |
| 30               | 1                | 0              | 6.534142                | 0.346417  | 0.749664  |
| 31               | 1                | 0              | 5.687616                | -0.433578 | 2.092732  |

## Structure 13f (C<sub>2</sub>H<sub>5</sub>OH)

Energy (Hartrees): -800.680756688

No imaginary frequencies

Standard orientation:

| Center<br>Number | Atomic<br>Number | Atomic<br>Type | Coordinates (Angstroms) |           |           |
|------------------|------------------|----------------|-------------------------|-----------|-----------|
|                  |                  |                | X                       | Y         | Z         |
| 1                | 6                | 0              | -2.834404               | 1.139553  | 0.047005  |
| 2                | 6                | 0              | -1.475382               | 1.363084  | -0.079629 |
| 3                | 6                | 0              | -0.559618               | 0.294425  | -0.145461 |
| 4                | 6                | 0              | -1.071484               | -1.015788 | -0.086988 |
| 5                | 6                | 0              | -2.429605               | -1.257552 | 0.017750  |
| 6                | 6                | 0              | -3.294993               | -0.172106 | 0.090555  |
| 7                | 1                | 0              | -3.530434               | 1.967012  | 0.090346  |
| 8                | 1                | 0              | -1.125354               | 2.384852  | -0.162088 |
| 9                | 1                | 0              | -0.391876               | -1.859837 | -0.094756 |
| 10               | 1                | 0              | -2.810948               | -2.269079 | 0.064315  |
| 11               | 6                | 0              | 0.885045                | 0.531910  | -0.277094 |
| 12               | 6                | 0              | 1.631922                | -0.378362 | -1.024134 |
| 13               | 1                | 0              | 1.097947                | -1.047233 | -1.696314 |
| 14               | 6                | 0              | 1.426941                | 1.766465  | 0.238054  |
| 15               | 1                | 0              | 0.786482                | 2.292681  | 0.966016  |
| 16               | 1                | 0              | 3.286281                | -1.240796 | -1.703997 |
| 17               | 7                | 0              | 2.940090                | -0.571497 | -1.025739 |
| 18               | 8                | 0              | 2.491888                | 2.285440  | -0.093096 |
| 19               | 7                | 0              | -4.726184               | -0.415166 | 0.216632  |
| 20               | 8                | 0              | -5.476336               | 0.543769  | 0.260262  |
| 21               | 8                | 0              | -5.117761               | -1.567708 | 0.272927  |
| 22               | 6                | 0              | 3.905203                | -0.140969 | -0.019867 |
| 23               | 6                | 0              | 5.002861                | -1.186237 | 0.123665  |
| 24               | 1                | 0              | 3.367698                | -0.011935 | 0.923840  |
| 25               | 1                | 0              | 4.329024                | 0.828875  | -0.290405 |
| 26               | 6                | 0              | 6.039471                | -0.750515 | 1.153499  |
| 27               | 1                | 0              | 4.557263                | -2.141463 | 0.417284  |
| 28               | 1                | 0              | 5.482814                | -1.336124 | -0.849499 |
| 29               | 1                | 0              | 6.823498                | -1.502617 | 1.261949  |
| 30               | 1                | 0              | 6.513362                | 0.189353  | 0.858018  |
| 31               | 1                | 0              | 5.578832                | -0.602498 | 2.134148  |

## Structure 13g (vacuum)

Energy (Hartrees): -800.657442810

No imaginary frequencies

Standard orientation:

| Center<br>Number | Atomic<br>Number | Atomic<br>Type | Coordinates (Angstroms) |           |           |
|------------------|------------------|----------------|-------------------------|-----------|-----------|
|                  |                  |                | X                       | Y         | Z         |
| 1                | 6                | 0              | -0.997496               | -0.794771 | -0.416742 |
| 2                | 6                | 0              | -2.320568               | -1.206790 | -0.405383 |
| 3                | 6                | 0              | -3.292281               | -0.304212 | -0.000143 |
| 4                | 6                | 0              | -2.978846               | 0.985600  | 0.401364  |
| 5                | 6                | 0              | -1.649267               | 1.375688  | 0.400038  |
| 6                | 6                | 0              | -0.636827               | 0.500633  | -0.018911 |
| 7                | 1                | 0              | -0.235723               | -1.480454 | -0.769029 |
| 8                | 1                | 0              | -2.610389               | -2.201096 | -0.717333 |
| 9                | 1                | 0              | -3.767128               | 1.651978  | 0.724694  |
| 10               | 1                | 0              | -1.386976               | 2.365202  | 0.754730  |
| 11               | 6                | 0              | 0.773396                | 0.928894  | -0.046696 |
| 12               | 6                | 0              | 1.111256                | 2.184297  | -0.457309 |
| 13               | 6                | 0              | 1.828204                | 0.005891  | 0.349512  |
| 14               | 1                | 0              | 0.356437                | 2.893131  | -0.788027 |
| 15               | 1                | 0              | 1.525039                | -0.986053 | 0.707401  |
| 16               | 8                | 0              | 2.338998                | 2.645344  | -0.524245 |
| 17               | 1                | 0              | 2.945048                | 1.899714  | -0.221348 |
| 18               | 7                | 0              | 3.062873                | 0.337275  | 0.317275  |
| 19               | 7                | 0              | -4.702686               | -0.731734 | 0.010771  |
| 20               | 8                | 0              | -5.531192               | 0.076399  | 0.372154  |
| 21               | 8                | 0              | -4.948410               | -1.865474 | -0.342405 |
| 22               | 6                | 0              | 4.070597                | -0.620147 | 0.735086  |
| 23               | 6                | 0              | 5.018224                | -0.950184 | -0.415934 |
| 24               | 1                | 0              | 3.605678                | -1.540425 | 1.116787  |
| 25               | 1                | 0              | 4.643092                | -0.172875 | 1.554509  |
| 26               | 6                | 0              | 6.136727                | -1.889535 | 0.026195  |
| 27               | 1                | 0              | 4.441206                | -1.400915 | -1.228961 |
| 28               | 1                | 0              | 5.434850                | -0.016657 | -0.804033 |
| 29               | 1                | 0              | 6.805516                | -2.123220 | -0.803409 |
| 30               | 1                | 0              | 6.734608                | -1.437445 | 0.821512  |
| 31               | 1                | 0              | 5.733555                | -2.832003 | 0.405692  |



## Structure 13g (CHCl<sub>3</sub>)

Energy (Hartrees): -800.677163327

No imaginary frequencies

Standard orientation:

| Center<br>Number | Atomic<br>Number | Atomic<br>Type | Coordinates (Angstroms) |           |           |
|------------------|------------------|----------------|-------------------------|-----------|-----------|
|                  |                  |                | X                       | Y         | Z         |
| 1                | 6                | 0              | -0.994614               | -0.804869 | -0.390434 |
| 2                | 6                | 0              | -2.317534               | -1.215669 | -0.382607 |
| 3                | 6                | 0              | -3.293194               | -0.304024 | -0.002410 |
| 4                | 6                | 0              | -2.982396               | 0.995729  | 0.374947  |
| 5                | 6                | 0              | -1.653504               | 1.385081  | 0.376552  |
| 6                | 6                | 0              | -0.637509               | 0.499509  | -0.015222 |
| 7                | 1                | 0              | -0.231771               | -1.500881 | -0.719284 |
| 8                | 1                | 0              | -2.593821               | -2.218921 | -0.678715 |
| 9                | 1                | 0              | -3.765799               | 1.677005  | 0.679223  |
| 10               | 1                | 0              | -1.397410               | 2.384635  | 0.707211  |
| 11               | 6                | 0              | 0.772752                | 0.925395  | -0.037200 |
| 12               | 6                | 0              | 1.111705                | 2.184230  | -0.437036 |
| 13               | 6                | 0              | 1.827677                | -0.001928 | 0.355030  |
| 14               | 1                | 0              | 0.363319                | 2.901829  | -0.763675 |
| 15               | 1                | 0              | 1.531570                | -0.997066 | 0.705507  |
| 16               | 8                | 0              | 2.347591                | 2.633464  | -0.496172 |
| 17               | 1                | 0              | 2.944840                | 1.868462  | -0.193501 |
| 18               | 7                | 0              | 3.060674                | 0.338930  | 0.322162  |
| 19               | 7                | 0              | -4.697413               | -0.728540 | 0.006167  |
| 20               | 8                | 0              | -5.541990               | 0.095475  | 0.297050  |
| 21               | 8                | 0              | -4.947362               | -1.883313 | -0.278379 |
| 22               | 6                | 0              | 4.079487                | -0.613115 | 0.731998  |
| 23               | 6                | 0              | 5.010841                | -0.945209 | -0.431268 |
| 24               | 1                | 0              | 3.620973                | -1.531029 | 1.123206  |
| 25               | 1                | 0              | 4.661319                | -0.157030 | 1.539682  |
| 26               | 6                | 0              | 6.133188                | -1.884070 | -0.000581 |
| 27               | 1                | 0              | 4.423374                | -1.400411 | -1.234773 |
| 28               | 1                | 0              | 5.426138                | -0.013556 | -0.826870 |
| 29               | 1                | 0              | 6.790556                | -2.122214 | -0.839217 |
| 30               | 1                | 0              | 6.743201                | -1.429707 | 0.784966  |
| 31               | 1                | 0              | 5.733390                | -2.825206 | 0.387335  |

## Structure 13g (DMSO)

Energy (Hartrees): -800.675454892

No imaginary frequencies

Standard orientation:

| Center<br>Number | Atomic<br>Number | Atomic<br>Type | Coordinates (Angstroms) |           |           |
|------------------|------------------|----------------|-------------------------|-----------|-----------|
|                  |                  |                | X                       | Y         | Z         |
| 1                | 6                | 0              | -1.109135               | -0.702911 | -0.748440 |
| 2                | 6                | 0              | -2.440405               | -1.073351 | -0.654694 |
| 3                | 6                | 0              | -3.306352               | -0.264307 | 0.069379  |
| 4                | 6                | 0              | -2.874874               | 0.892109  | 0.707201  |
| 5                | 6                | 0              | -1.538621               | 1.241903  | 0.613749  |
| 6                | 6                | 0              | -0.633922               | 0.460836  | -0.123508 |
| 7                | 1                | 0              | -0.436566               | -1.316405 | -1.336267 |
| 8                | 1                | 0              | -2.804684               | -1.967089 | -1.143721 |
| 9                | 1                | 0              | -3.568310               | 1.494389  | 1.279085  |
| 10               | 1                | 0              | -1.189425               | 2.123421  | 1.138574  |
| 11               | 6                | 0              | 0.781177                | 0.850263  | -0.246832 |
| 12               | 6                | 0              | 1.138037                | 2.165242  | -0.323967 |
| 13               | 6                | 0              | 1.823863                | -0.168107 | -0.299742 |
| 14               | 1                | 0              | 0.398610                | 2.962052  | -0.304154 |
| 15               | 1                | 0              | 1.529437                | -1.216224 | -0.181813 |
| 16               | 8                | 0              | 2.379227                | 2.582972  | -0.452876 |
| 17               | 1                | 0              | 2.957491                | 1.741075  | -0.482215 |
| 18               | 7                | 0              | 3.055674                | 0.150747  | -0.444754 |
| 19               | 7                | 0              | -4.717445               | -0.645800 | 0.169156  |
| 20               | 8                | 0              | -5.457167               | 0.060358  | 0.828093  |
| 21               | 8                | 0              | -5.082901               | -1.650011 | -0.412472 |
| 22               | 6                | 0              | 4.070670                | -0.890003 | -0.420400 |
| 23               | 6                | 0              | 5.047881                | -0.659611 | 0.729198  |
| 24               | 1                | 0              | 4.616863                | -0.854855 | -1.368836 |
| 25               | 1                | 0              | 3.605815                | -1.880206 | -0.330680 |
| 26               | 6                | 0              | 6.137458                | -1.725347 | 0.759319  |
| 27               | 1                | 0              | 5.492673                | 0.334395  | 0.620504  |
| 28               | 1                | 0              | 4.489491                | -0.661665 | 1.670563  |
| 29               | 1                | 0              | 6.834480                | -1.552221 | 1.581928  |
| 30               | 1                | 0              | 5.707418                | -2.722526 | 0.888389  |
| 31               | 1                | 0              | 6.711172                | -1.725614 | -0.171722 |

## Structure 13g (C<sub>2</sub>H<sub>5</sub>OH)

Energy (Hartrees): -800.676027909

No imaginary frequencies

Standard orientation:

| Center<br>Number | Atomic<br>Number | Atomic<br>Type | Coordinates (Angstroms) |           |           |
|------------------|------------------|----------------|-------------------------|-----------|-----------|
|                  |                  |                | X                       | Y         | Z         |
| 1                | 6                | 0              | -1.105028               | -0.690675 | -0.758413 |
| 2                | 6                | 0              | -2.434180               | -1.067664 | -0.667290 |
| 3                | 6                | 0              | -3.302170               | -0.266927 | 0.064337  |
| 4                | 6                | 0              | -2.876654               | 0.888627  | 0.708597  |
| 5                | 6                | 0              | -1.542552               | 1.244726  | 0.616334  |
| 6                | 6                | 0              | -0.634912               | 0.470698  | -0.124885 |
| 7                | 1                | 0              | -0.429801               | -1.297122 | -1.350492 |
| 8                | 1                | 0              | -2.794402               | -1.959557 | -1.162814 |
| 9                | 1                | 0              | -3.572376               | 1.484706  | 1.284286  |
| 10               | 1                | 0              | -1.197171               | 2.124425  | 1.146763  |
| 11               | 6                | 0              | 0.779548                | 0.864720  | -0.242790 |
| 12               | 6                | 0              | 1.129166                | 2.179372  | -0.319581 |
| 13               | 6                | 0              | 1.824577                | -0.153077 | -0.293440 |
| 14               | 1                | 0              | 0.389493                | 2.975496  | -0.306349 |
| 15               | 1                | 0              | 1.527851                | -1.201161 | -0.180969 |
| 16               | 8                | 0              | 2.374084                | 2.603427  | -0.443300 |
| 17               | 1                | 0              | 2.961404                | 1.769181  | -0.469423 |
| 18               | 7                | 0              | 3.056770                | 0.164625  | -0.431999 |
| 19               | 7                | 0              | -4.706185               | -0.656761 | 0.168052  |
| 20               | 8                | 0              | -5.450806               | 0.036415  | 0.836470  |
| 21               | 8                | 0              | -5.074428               | -1.658411 | -0.417787 |
| 22               | 6                | 0              | 4.064927                | -0.884204 | -0.416983 |
| 23               | 6                | 0              | 5.047210                | -0.679714 | 0.732669  |
| 24               | 1                | 0              | 4.609861                | -0.842679 | -1.365882 |
| 25               | 1                | 0              | 3.592109                | -1.871744 | -0.340091 |
| 26               | 6                | 0              | 6.126581                | -1.756671 | 0.742111  |
| 27               | 1                | 0              | 5.502241                | 0.310995  | 0.637577  |
| 28               | 1                | 0              | 4.493182                | -0.691079 | 1.676604  |
| 29               | 1                | 0              | 6.831299                | -1.600804 | 1.561697  |
| 30               | 1                | 0              | 5.688284                | -2.751434 | 0.862450  |
| 31               | 1                | 0              | 6.694060                | -1.751008 | -0.192795 |

### Structure 13h (vacuum)

Energy (Hartrees): -800.633413082

No imaginary frequencies

Standard orientation:

| Center<br>Number | Atomic<br>Number | Atomic<br>Type | Coordinates (Angstroms) |           |           |
|------------------|------------------|----------------|-------------------------|-----------|-----------|
|                  |                  |                | X                       | Y         | Z         |
| 1                | 6                | 0              | 2.346734                | -1.073616 | -0.638463 |
| 2                | 6                | 0              | 1.026746                | -0.655534 | -0.698577 |
| 3                | 6                | 0              | 0.611828                | 0.529113  | -0.074239 |
| 4                | 6                | 0              | 1.560689                | 1.279557  | 0.633455  |
| 5                | 6                | 0              | 2.887532                | 0.882921  | 0.693632  |
| 6                | 6                | 0              | 3.257698                | -0.290875 | 0.054842  |
| 7                | 1                | 0              | 2.679864                | -1.980850 | -1.124149 |
| 8                | 1                | 0              | 0.308178                | -1.243265 | -1.257992 |
| 9                | 1                | 0              | 1.249157                | 2.168138  | 1.169464  |
| 10               | 1                | 0              | 3.628409                | 1.451735  | 1.239038  |
| 11               | 6                | 0              | -0.803777               | 0.948869  | -0.169054 |
| 12               | 6                | 0              | -1.085068               | 2.253326  | -0.333762 |
| 13               | 1                | 0              | -0.275271               | 2.973003  | -0.427412 |
| 14               | 6                | 0              | -1.830345               | -0.108011 | -0.073482 |
| 15               | 1                | 0              | -1.505755               | -1.016538 | 0.458308  |
| 16               | 7                | 0              | -2.997644               | -0.009049 | -0.551114 |
| 17               | 8                | 0              | -2.330757               | 2.747930  | -0.396106 |
| 18               | 1                | 0              | -2.299446               | 3.696961  | -0.535338 |
| 19               | 7                | 0              | 4.665153                | -0.725450 | 0.122719  |
| 20               | 8                | 0              | 5.439923                | -0.025050 | 0.738842  |
| 21               | 8                | 0              | 4.961989                | -1.755744 | -0.443156 |
| 22               | 6                | 0              | -3.905826               | -1.116710 | -0.324333 |
| 23               | 6                | 0              | -5.104926               | -0.664780 | 0.507703  |
| 24               | 1                | 0              | -3.407844               | -1.965630 | 0.170993  |
| 25               | 1                | 0              | -4.263359               | -1.459675 | -1.301224 |
| 26               | 6                | 0              | -6.114541               | -1.792404 | 0.701360  |
| 27               | 1                | 0              | -4.743590               | -0.307004 | 1.476576  |
| 28               | 1                | 0              | -5.570404               | 0.189353  | 0.009465  |
| 29               | 1                | 0              | -6.967390               | -1.462281 | 1.296810  |
| 30               | 1                | 0              | -6.495011               | -2.146232 | -0.260386 |
| 31               | 1                | 0              | -5.659806               | -2.644445 | 1.213474  |

## Structure 13h (CHCl<sub>3</sub>)

Energy (Hartrees): -800.658866320

No imaginary frequencies

Standard orientation:

| Center<br>Number | Atomic<br>Number | Atomic<br>Type | Coordinates (Angstroms) |           |           |
|------------------|------------------|----------------|-------------------------|-----------|-----------|
|                  |                  |                | X                       | Y         | Z         |
| 1                | 6                | 0              | 2.330901                | -1.088895 | -0.616761 |
| 2                | 6                | 0              | 1.013267                | -0.664913 | -0.676030 |
| 3                | 6                | 0              | 0.608338                | 0.535939  | -0.073798 |
| 4                | 6                | 0              | 1.566757                | 1.297703  | 0.611824  |
| 5                | 6                | 0              | 2.890945                | 0.895083  | 0.671098  |
| 6                | 6                | 0              | 3.251213                | -0.295749 | 0.054461  |
| 7                | 1                | 0              | 2.646165                | -2.008994 | -1.090477 |
| 8                | 1                | 0              | 0.290882                | -1.263764 | -1.218616 |
| 9                | 1                | 0              | 1.269436                | 2.202700  | 1.128276  |
| 10               | 1                | 0              | 3.631121                | 1.479360  | 1.201337  |
| 11               | 6                | 0              | -0.805627               | 0.960830  | -0.170054 |
| 12               | 6                | 0              | -1.081628               | 2.271793  | -0.312657 |
| 13               | 1                | 0              | -0.275541               | 2.996926  | -0.389045 |
| 14               | 6                | 0              | -1.834179               | -0.093934 | -0.083671 |
| 15               | 1                | 0              | -1.521605               | -0.997855 | 0.459922  |
| 16               | 7                | 0              | -2.997758               | -0.004414 | -0.579189 |
| 17               | 8                | 0              | -2.323427               | 2.768757  | -0.372607 |
| 18               | 1                | 0              | -2.282806               | 3.726736  | -0.475375 |
| 19               | 7                | 0              | 4.650658                | -0.734083 | 0.120667  |
| 20               | 8                | 0              | 5.446171                | -0.021285 | 0.700131  |
| 21               | 8                | 0              | 4.944682                | -1.787437 | -0.408790 |
| 22               | 6                | 0              | -3.902617               | -1.118244 | -0.345208 |
| 23               | 6                | 0              | -5.097182               | -0.674867 | 0.497718  |
| 24               | 1                | 0              | -3.394198               | -1.960743 | 0.147162  |
| 25               | 1                | 0              | -4.265815               | -1.464927 | -1.318667 |
| 26               | 6                | 0              | -6.085201               | -1.816033 | 0.716542  |
| 27               | 1                | 0              | -4.729054               | -0.303728 | 1.459584  |
| 28               | 1                | 0              | -5.588891               | 0.164961  | -0.001569 |
| 29               | 1                | 0              | -6.936064               | -1.492024 | 1.319643  |
| 30               | 1                | 0              | -6.472943               | -2.186860 | -0.236506 |
| 31               | 1                | 0              | -5.610319               | -2.654856 | 1.233331  |

## Structure 13h (DMSO)

Energy (Hartrees): -800.657048028

No imaginary frequencies

Standard orientation:

| Center<br>Number | Atomic<br>Number | Atomic<br>Type | Coordinates (Angstroms) |           |           |
|------------------|------------------|----------------|-------------------------|-----------|-----------|
|                  |                  |                | X                       | Y         | Z         |
| 1                | 6                | 0              | 2.313361                | -1.093312 | -0.608935 |
| 2                | 6                | 0              | 0.998470                | -0.660621 | -0.665619 |
| 3                | 6                | 0              | 0.605256                | 0.548103  | -0.071268 |
| 4                | 6                | 0              | 1.571039                | 1.309308  | 0.604591  |
| 5                | 6                | 0              | 2.892018                | 0.896596  | 0.662844  |
| 6                | 6                | 0              | 3.241854                | -0.301596 | 0.053227  |
| 7                | 1                | 0              | 2.615886                | -2.020126 | -1.077956 |
| 8                | 1                | 0              | 0.270327                | -1.261405 | -1.198608 |
| 9                | 1                | 0              | 1.283982                | 2.223080  | 1.111268  |
| 10               | 1                | 0              | 3.635847                | 1.482422  | 1.186365  |
| 11               | 6                | 0              | -0.807054               | 0.980244  | -0.166799 |
| 12               | 6                | 0              | -1.073615               | 2.294788  | -0.299954 |
| 13               | 1                | 0              | -0.261622               | 3.014874  | -0.359549 |
| 14               | 6                | 0              | -1.832377               | -0.077515 | -0.082045 |
| 15               | 1                | 0              | -1.517268               | -0.977167 | 0.465831  |
| 16               | 7                | 0              | -2.995477               | -0.001450 | -0.583128 |
| 17               | 8                | 0              | -2.311032               | 2.803414  | -0.369925 |
| 18               | 1                | 0              | -2.254260               | 3.764729  | -0.436776 |
| 19               | 7                | 0              | 4.637593                | -0.748430 | 0.116845  |
| 20               | 8                | 0              | 5.438257                | -0.045723 | 0.703672  |
| 21               | 8                | 0              | 4.927901                | -1.799353 | -0.422060 |
| 22               | 6                | 0              | -3.889168               | -1.125435 | -0.344828 |
| 23               | 6                | 0              | -5.093820               | -0.690782 | 0.487483  |
| 24               | 1                | 0              | -3.372321               | -1.955593 | 0.157928  |
| 25               | 1                | 0              | -4.243131               | -1.485222 | -1.317139 |
| 26               | 6                | 0              | -6.062813               | -1.846199 | 0.714454  |
| 27               | 1                | 0              | -4.736287               | -0.304376 | 1.447518  |
| 28               | 1                | 0              | -5.600559               | 0.134086  | -0.022649 |
| 29               | 1                | 0              | -6.922679               | -1.530313 | 1.309320  |
| 30               | 1                | 0              | -6.437959               | -2.234097 | -0.236925 |
| 31               | 1                | 0              | -5.574675               | -2.669921 | 1.242948  |

## Structure 13h (C<sub>2</sub>H<sub>5</sub>OH)

Energy (Hartrees): -800.663006819

No imaginary frequencies

Standard orientation:

| Center<br>Number | Atomic<br>Number | Atomic<br>Type | Coordinates (Angstroms) |           |           |
|------------------|------------------|----------------|-------------------------|-----------|-----------|
|                  |                  |                | X                       | Y         | Z         |
| 1                | 6                | 0              | 2.307756                | -1.113066 | -0.576286 |
| 2                | 6                | 0              | 0.993651                | -0.679351 | -0.633814 |
| 3                | 6                | 0              | 0.606955                | 0.545954  | -0.068336 |
| 4                | 6                | 0              | 1.581133                | 1.324083  | 0.577224  |
| 5                | 6                | 0              | 2.902204                | 0.914409  | 0.629898  |
| 6                | 6                | 0              | 3.243995                | -0.302159 | 0.051569  |
| 7                | 1                | 0              | 2.604762                | -2.053412 | -1.021629 |
| 8                | 1                | 0              | 0.260672                | -1.292946 | -1.145147 |
| 9                | 1                | 0              | 1.300548                | 2.249494  | 1.065709  |
| 10               | 1                | 0              | 3.651053                | 1.514346  | 1.129885  |
| 11               | 6                | 0              | -0.804531               | 0.976572  | -0.159286 |
| 12               | 6                | 0              | -1.079075               | 2.291424  | -0.280564 |
| 13               | 1                | 0              | -0.278749               | 3.023661  | -0.338488 |
| 14               | 6                | 0              | -1.832432               | -0.078930 | -0.083062 |
| 15               | 1                | 0              | -1.526969               | -0.978888 | 0.469023  |
| 16               | 7                | 0              | -2.991124               | 0.001549  | -0.595645 |
| 17               | 8                | 0              | -2.322048               | 2.787423  | -0.340737 |
| 18               | 1                | 0              | -2.284915               | 3.750594  | -0.391182 |
| 19               | 7                | 0              | 4.635413                | -0.745912 | 0.112453  |
| 20               | 8                | 0              | 5.461922                | 0.006668  | 0.594009  |
| 21               | 8                | 0              | 4.910693                | -1.848734 | -0.322614 |
| 22               | 6                | 0              | -3.891154               | -1.118621 | -0.360203 |
| 23               | 6                | 0              | -5.091462               | -0.684066 | 0.477536  |
| 24               | 1                | 0              | -3.376323               | -1.953252 | 0.136427  |
| 25               | 1                | 0              | -4.248278               | -1.472912 | -1.333068 |
| 26               | 6                | 0              | -6.062396               | -1.838193 | 0.703861  |
| 27               | 1                | 0              | -4.729788               | -0.302119 | 1.437913  |
| 28               | 1                | 0              | -5.598284               | 0.143943  | -0.027478 |
| 29               | 1                | 0              | -6.919744               | -1.521803 | 1.302226  |
| 30               | 1                | 0              | -6.441558               | -2.222803 | -0.247336 |
| 31               | 1                | 0              | -5.574859               | -2.664546 | 1.228997  |

### Structure 13i (vacuum)

Energy (Hartrees): -800.640229757

No imaginary frequencies

Standard orientation:

| Center<br>Number | Atomic<br>Number | Atomic<br>Type | Coordinates (Angstroms) |           |           |
|------------------|------------------|----------------|-------------------------|-----------|-----------|
|                  |                  |                | X                       | Y         | Z         |
| 1                | 6                | 0              | 2.219804                | -1.166786 | -0.650388 |
| 2                | 6                | 0              | 0.912619                | -0.711791 | -0.728406 |
| 3                | 6                | 0              | 0.519907                | 0.478984  | -0.102280 |
| 4                | 6                | 0              | 1.478410                | 1.211363  | 0.611261  |
| 5                | 6                | 0              | 2.788991                | 0.769810  | 0.699253  |
| 6                | 6                | 0              | 3.136994                | -0.414601 | 0.066584  |
| 7                | 1                | 0              | 2.535691                | -2.079896 | -1.136213 |
| 8                | 1                | 0              | 0.189670                | -1.280186 | -1.301846 |
| 9                | 1                | 0              | 1.190412                | 2.129540  | 1.104652  |
| 10               | 1                | 0              | 3.538057                | 1.321139  | 1.251202  |
| 11               | 6                | 0              | -0.886472               | 0.920106  | -0.196432 |
| 12               | 6                | 0              | -1.264689               | 2.203343  | -0.302694 |
| 13               | 1                | 0              | -2.321438               | 2.441004  | -0.376392 |
| 14               | 6                | 0              | -1.950079               | -0.110091 | -0.178706 |
| 15               | 1                | 0              | -1.642070               | -1.096776 | 0.197279  |
| 16               | 7                | 0              | -3.141972               | 0.112854  | -0.541378 |
| 17               | 8                | 0              | -0.390608               | 3.230091  | -0.346955 |
| 18               | 1                | 0              | -0.860064               | 4.056977  | -0.477383 |
| 19               | 7                | 0              | 4.530086                | -0.890149 | 0.159852  |
| 20               | 8                | 0              | 5.312268                | -0.216682 | 0.796064  |
| 21               | 8                | 0              | 4.808739                | -1.926218 | -0.405339 |
| 22               | 6                | 0              | -4.107666               | -0.960083 | -0.397170 |
| 23               | 6                | 0              | -5.213167               | -0.564882 | 0.580270  |
| 24               | 1                | 0              | -3.633762               | -1.896366 | -0.063419 |
| 25               | 1                | 0              | -4.554966               | -1.142778 | -1.380256 |
| 26               | 6                | 0              | -6.285059               | -1.645308 | 0.690086  |
| 27               | 1                | 0              | -4.764101               | -0.374919 | 1.560083  |
| 28               | 1                | 0              | -5.652440               | 0.378133  | 0.243950  |
| 29               | 1                | 0              | -7.071032               | -1.352380 | 1.388003  |
| 30               | 1                | 0              | -6.751966               | -1.832086 | -0.280442 |
| 31               | 1                | 0              | -5.859544               | -2.588245 | 1.043020  |



## Structure 13i (CHCl<sub>3</sub>)

Energy (Hartrees): -800.663408923

No imaginary frequencies

Standard orientation:

| Center<br>Number | Atomic<br>Number | Atomic<br>Type | Coordinates (Angstroms) |           |           |
|------------------|------------------|----------------|-------------------------|-----------|-----------|
|                  |                  |                | X                       | Y         | Z         |
| 1                | 6                | 0              | 2.196723                | -1.195304 | -0.597381 |
| 2                | 6                | 0              | 0.890486                | -0.737669 | -0.664258 |
| 3                | 6                | 0              | 0.516621                | 0.482513  | -0.081314 |
| 4                | 6                | 0              | 1.495007                | 1.237537  | 0.583503  |
| 5                | 6                | 0              | 2.805273                | 0.794518  | 0.659394  |
| 6                | 6                | 0              | 3.134524                | -0.417023 | 0.065925  |
| 7                | 1                | 0              | 2.488431                | -2.130773 | -1.055612 |
| 8                | 1                | 0              | 0.153081                | -1.329569 | -1.194179 |
| 9                | 1                | 0              | 1.225630                | 2.173499  | 1.053901  |
| 10               | 1                | 0              | 3.561284                | 1.370783  | 1.175828  |
| 11               | 6                | 0              | -0.889075               | 0.925756  | -0.167536 |
| 12               | 6                | 0              | -1.265992               | 2.212449  | -0.280254 |
| 13               | 1                | 0              | -2.320567               | 2.465223  | -0.327241 |
| 14               | 6                | 0              | -1.949483               | -0.104907 | -0.128997 |
| 15               | 1                | 0              | -1.665003               | -1.057770 | 0.338978  |
| 16               | 7                | 0              | -3.120219               | 0.077611  | -0.580221 |
| 17               | 8                | 0              | -0.394522               | 3.231131  | -0.363088 |
| 18               | 1                | 0              | -0.870833               | 4.065145  | -0.450679 |
| 19               | 7                | 0              | 4.522290                | -0.890976 | 0.142749  |
| 20               | 8                | 0              | 5.335520                | -0.189321 | 0.710782  |
| 21               | 8                | 0              | 4.788880                | -1.961764 | -0.365982 |
| 22               | 6                | 0              | -4.088575               | -0.991182 | -0.394994 |
| 23               | 6                | 0              | -5.207993               | -0.551831 | 0.547260  |
| 24               | 1                | 0              | -3.615308               | -1.904957 | -0.007077 |
| 25               | 1                | 0              | -4.521249               | -1.223991 | -1.373850 |
| 26               | 6                | 0              | -6.295829               | -1.614074 | 0.667076  |
| 27               | 1                | 0              | -4.776629               | -0.340043 | 1.531136  |
| 28               | 1                | 0              | -5.632753               | 0.385123  | 0.175151  |
| 29               | 1                | 0              | -7.081858               | -1.296550 | 1.355461  |
| 30               | 1                | 0              | -6.760543               | -1.809865 | -0.303267 |
| 31               | 1                | 0              | -5.887337               | -2.557750 | 1.039518  |

## Structure 13i (DMSO)

Energy (Hartrees): -800.660379743

No imaginary frequencies

Standard orientation:

| Center<br>Number | Atomic<br>Number | Atomic<br>Type | Coordinates (Angstroms) |           |           |
|------------------|------------------|----------------|-------------------------|-----------|-----------|
|                  |                  |                | X                       | Y         | Z         |
| 1                | 6                | 0              | 2.185347                | -1.190154 | -0.600598 |
| 2                | 6                | 0              | 0.881088                | -0.726013 | -0.662456 |
| 3                | 6                | 0              | 0.515805                | 0.494607  | -0.075311 |
| 4                | 6                | 0              | 1.498359                | 1.242540  | 0.591025  |
| 5                | 6                | 0              | 2.806443                | 0.792303  | 0.663441  |
| 6                | 6                | 0              | 3.128492                | -0.418268 | 0.063213  |
| 7                | 1                | 0              | 2.466764                | -2.126910 | -1.062727 |
| 8                | 1                | 0              | 0.138633                | -1.315288 | -1.188641 |
| 9                | 1                | 0              | 1.235728                | 2.176438  | 1.069410  |
| 10               | 1                | 0              | 3.563590                | 1.363887  | 1.183554  |
| 11               | 6                | 0              | -0.889688               | 0.940555  | -0.155592 |
| 12               | 6                | 0              | -1.266458               | 2.227256  | -0.270328 |
| 13               | 1                | 0              | -2.320166               | 2.487550  | -0.300160 |
| 14               | 6                | 0              | -1.944636               | -0.094130 | -0.098083 |
| 15               | 1                | 0              | -1.666211               | -1.021547 | 0.420410  |
| 16               | 7                | 0              | -3.103942               | 0.055561  | -0.591069 |
| 17               | 8                | 0              | -0.391244               | 3.241208  | -0.373612 |
| 18               | 1                | 0              | -0.868206               | 4.078265  | -0.433704 |
| 19               | 7                | 0              | 4.513417                | -0.899178 | 0.136581  |
| 20               | 8                | 0              | 5.329724                | -0.208333 | 0.715442  |
| 21               | 8                | 0              | 4.777788                | -1.964940 | -0.385735 |
| 22               | 6                | 0              | -4.065110               | -1.016448 | -0.374614 |
| 23               | 6                | 0              | -5.243858               | -0.526597 | 0.463275  |
| 24               | 1                | 0              | -3.597465               | -1.882664 | 0.114608  |
| 25               | 1                | 0              | -4.435912               | -1.339631 | -1.353375 |
| 26               | 6                | 0              | -6.264702               | -1.635177 | 0.696197  |
| 27               | 1                | 0              | -4.864702               | -0.157225 | 1.421690  |
| 28               | 1                | 0              | -5.714411               | 0.320824  | -0.044648 |
| 29               | 1                | 0              | -7.109603               | -1.276145 | 1.287838  |
| 30               | 1                | 0              | -6.656215               | -2.011920 | -0.253123 |
| 31               | 1                | 0              | -5.814782               | -2.476639 | 1.230508  |

## Structure 13i (C<sub>2</sub>H<sub>5</sub>OH)

Energy (Hartrees): -800.665332764

No imaginary frequencies

Standard orientation:

| Center<br>Number | Atomic<br>Number | Atomic<br>Type | Coordinates (Angstroms) |           |           |
|------------------|------------------|----------------|-------------------------|-----------|-----------|
|                  |                  |                | X                       | Y         | Z         |
| 1                | 6                | 0              | 2.171990                | -1.201148 | -0.579255 |
| 2                | 6                | 0              | 0.869949                | -0.732561 | -0.637958 |
| 3                | 6                | 0              | 0.513446                | 0.499249  | -0.067159 |
| 4                | 6                | 0              | 1.505042                | 1.254567  | 0.578817  |
| 5                | 6                | 0              | 2.812244                | 0.802221  | 0.644701  |
| 6                | 6                | 0              | 3.123967                | -0.420061 | 0.061961  |
| 7                | 1                | 0              | 2.446205                | -2.146210 | -1.028985 |
| 8                | 1                | 0              | 0.121293                | -1.326325 | -1.150285 |
| 9                | 1                | 0              | 1.249113                | 2.194699  | 1.048952  |
| 10               | 1                | 0              | 3.575586                | 1.379709  | 1.149242  |
| 11               | 6                | 0              | -0.890683               | 0.946406  | -0.144514 |
| 12               | 6                | 0              | -1.267708               | 2.234337  | -0.256323 |
| 13               | 1                | 0              | -2.320279               | 2.497519  | -0.283250 |
| 14               | 6                | 0              | -1.945368               | -0.087315 | -0.088189 |
| 15               | 1                | 0              | -1.679366               | -1.000536 | 0.461019  |
| 16               | 7                | 0              | -3.092729               | 0.045661  | -0.614336 |
| 17               | 8                | 0              | -0.395680               | 3.249580  | -0.358824 |
| 18               | 1                | 0              | -0.869183               | 4.088513  | -0.422409 |
| 19               | 7                | 0              | 4.503206                | -0.903212 | 0.129261  |
| 20               | 8                | 0              | 5.342648                | -0.187730 | 0.643125  |
| 21               | 8                | 0              | 4.753678                | -2.000803 | -0.332446 |
| 22               | 6                | 0              | -4.054567               | -1.023761 | -0.383470 |
| 23               | 6                | 0              | -5.230548               | -0.528285 | 0.454236  |
| 24               | 1                | 0              | -3.585131               | -1.885309 | 0.111754  |
| 25               | 1                | 0              | -4.428489               | -1.357467 | -1.357156 |
| 26               | 6                | 0              | -6.255031               | -1.633060 | 0.690902  |
| 27               | 1                | 0              | -4.849252               | -0.157619 | 1.411498  |
| 28               | 1                | 0              | -5.700083               | 0.319210  | -0.054672 |
| 29               | 1                | 0              | -7.096508               | -1.270288 | 1.285314  |
| 30               | 1                | 0              | -6.651634               | -2.008469 | -0.256922 |
| 31               | 1                | 0              | -5.807190               | -2.476471 | 1.224098  |

## Structure 13j (vacuum)

Energy (Hartrees): -800.641025525

No imaginary frequencies

Standard orientation:

| Center<br>Number | Atomic<br>Number | Atomic<br>Type | Coordinates (Angstroms) |           |           |
|------------------|------------------|----------------|-------------------------|-----------|-----------|
|                  |                  |                | X                       | Y         | Z         |
| 1                | 6                | 0              | 1.720966                | -0.946043 | -0.927241 |
| 2                | 6                | 0              | 0.537734                | -0.225753 | -0.977054 |
| 3                | 6                | 0              | 0.319378                | 0.849849  | -0.109063 |
| 4                | 6                | 0              | 1.305129                | 1.181962  | 0.825812  |
| 5                | 6                | 0              | 2.490537                | 0.465355  | 0.893921  |
| 6                | 6                | 0              | 2.677006                | -0.585617 | 0.009998  |
| 7                | 1                | 0              | 1.910040                | -1.774997 | -1.595305 |
| 8                | 1                | 0              | -0.228878               | -0.500656 | -1.687599 |
| 9                | 1                | 0              | 1.140342                | 2.006563  | 1.506696  |
| 10               | 1                | 0              | 3.261228                | 0.705052  | 1.613633  |
| 11               | 6                | 0              | -0.935529               | 1.632865  | -0.188862 |
| 12               | 6                | 0              | -0.955457               | 2.974997  | -0.143825 |
| 13               | 1                | 0              | -1.897125               | 3.513142  | -0.215995 |
| 14               | 6                | 0              | -2.242369               | 0.973257  | -0.333127 |
| 15               | 1                | 0              | -3.103224               | 1.657817  | -0.398817 |
| 16               | 7                | 0              | -2.396829               | -0.281282 | -0.373474 |
| 17               | 8                | 0              | 0.157967                | 3.727884  | -0.017593 |
| 18               | 1                | 0              | -0.057790               | 4.659653  | -0.095457 |
| 19               | 7                | 0              | 3.938415                | -1.349880 | 0.071385  |
| 20               | 8                | 0              | 4.754475                | -1.022168 | 0.906514  |
| 21               | 8                | 0              | 4.083889                | -2.258747 | -0.717820 |
| 22               | 6                | 0              | -3.748507               | -0.795648 | -0.486099 |
| 23               | 6                | 0              | -4.107620               | -1.636426 | 0.737472  |
| 24               | 1                | 0              | -3.791848               | -1.431792 | -1.376964 |
| 25               | 1                | 0              | -4.487907               | 0.010902  | -0.614908 |
| 26               | 6                | 0              | -5.488572               | -2.271358 | 0.601909  |
| 27               | 1                | 0              | -3.341383               | -2.404891 | 0.867135  |
| 28               | 1                | 0              | -4.068090               | -0.998241 | 1.625577  |
| 29               | 1                | 0              | -5.741338               | -2.860635 | 1.484822  |
| 30               | 1                | 0              | -6.262480               | -1.509498 | 0.475889  |
| 31               | 1                | 0              | -5.529474               | -2.934678 | -0.265925 |

## Structure 13j (CHCl<sub>3</sub>)

Energy (Hartrees): -800.665687876

No imaginary frequencies

Standard orientation:

| Center<br>Number | Atomic<br>Number | Atomic<br>Type | Coordinates (Angstroms) |           |           |
|------------------|------------------|----------------|-------------------------|-----------|-----------|
|                  |                  |                | X                       | Y         | Z         |
| 1                | 6                | 0              | 1.755996                | -0.895242 | -0.978314 |
| 2                | 6                | 0              | 0.574452                | -0.173060 | -1.028734 |
| 3                | 6                | 0              | 0.323954                | 0.857543  | -0.114242 |
| 4                | 6                | 0              | 1.282372                | 1.147572  | 0.863491  |
| 5                | 6                | 0              | 2.467762                | 0.431310  | 0.932372  |
| 6                | 6                | 0              | 2.682058                | -0.579412 | 0.006362  |
| 7                | 1                | 0              | 1.958914                | -1.688569 | -1.685040 |
| 8                | 1                | 0              | -0.162241               | -0.407325 | -1.785560 |
| 9                | 1                | 0              | 1.095530                | 1.936465  | 1.581140  |
| 10               | 1                | 0              | 3.210465                | 0.643307  | 1.689757  |
| 11               | 6                | 0              | -0.935680               | 1.633168  | -0.188322 |
| 12               | 6                | 0              | -0.958248               | 2.977648  | -0.136118 |
| 13               | 1                | 0              | -1.898375               | 3.518625  | -0.206960 |
| 14               | 6                | 0              | -2.236720               | 0.968501  | -0.334416 |
| 15               | 1                | 0              | -3.095872               | 1.649164  | -0.422237 |
| 16               | 7                | 0              | -2.389749               | -0.289948 | -0.347738 |
| 17               | 8                | 0              | 0.153149                | 3.723821  | -0.016036 |
| 18               | 1                | 0              | -0.072021               | 4.660894  | -0.050232 |
| 19               | 7                | 0              | 3.934034                | -1.346766 | 0.074779  |
| 20               | 8                | 0              | 4.743053                | -1.046387 | 0.930137  |
| 21               | 8                | 0              | 4.097701                | -2.243972 | -0.727593 |
| 22               | 6                | 0              | -3.743882               | -0.802746 | -0.476808 |
| 23               | 6                | 0              | -4.121034               | -1.652278 | 0.734590  |
| 24               | 1                | 0              | -3.779886               | -1.432206 | -1.373084 |
| 25               | 1                | 0              | -4.476358               | 0.007944  | -0.607301 |
| 26               | 6                | 0              | -5.506976               | -2.270869 | 0.580923  |
| 27               | 1                | 0              | -3.367488               | -2.434694 | 0.862468  |
| 28               | 1                | 0              | -4.084587               | -1.024855 | 1.631020  |
| 29               | 1                | 0              | -5.769341               | -2.873755 | 1.452924  |
| 30               | 1                | 0              | -6.273836               | -1.499442 | 0.466004  |
| 31               | 1                | 0              | -5.550443               | -2.919072 | -0.298958 |

## Structure 13j (DMSO)

Energy (Hartrees): -800.663965910

No imaginary frequencies

Standard orientation:

| Center<br>Number | Atomic<br>Number | Atomic<br>Type | Coordinates (Angstroms) |           |           |
|------------------|------------------|----------------|-------------------------|-----------|-----------|
|                  |                  |                | X                       | Y         | Z         |
| 1                | 6                | 0              | 1.770884                | -0.849866 | -1.015050 |
| 2                | 6                | 0              | 0.592542                | -0.122162 | -1.062112 |
| 3                | 6                | 0              | 0.320449                | 0.866439  | -0.108077 |
| 4                | 6                | 0              | 1.254020                | 1.110594  | 0.905404  |
| 5                | 6                | 0              | 2.437216                | 0.389641  | 0.970480  |
| 6                | 6                | 0              | 2.672958                | -0.579709 | 0.005702  |
| 7                | 1                | 0              | 1.987203                | -1.609503 | -1.754180 |
| 8                | 1                | 0              | -0.122421               | -0.316936 | -1.851169 |
| 9                | 1                | 0              | 1.050163                | 1.865931  | 1.654361  |
| 10               | 1                | 0              | 3.159831                | 0.569891  | 1.755199  |
| 11               | 6                | 0              | -0.937542               | 1.644932  | -0.179344 |
| 12               | 6                | 0              | -0.954740               | 2.989670  | -0.126269 |
| 13               | 1                | 0              | -1.891868               | 3.536607  | -0.191695 |
| 14               | 6                | 0              | -2.236499               | 0.979281  | -0.326225 |
| 15               | 1                | 0              | -3.096821               | 1.655916  | -0.419948 |
| 16               | 7                | 0              | -2.383139               | -0.281721 | -0.334945 |
| 17               | 8                | 0              | 0.163927                | 3.725586  | -0.017542 |
| 18               | 1                | 0              | -0.060177               | 4.664322  | -0.034328 |
| 19               | 7                | 0              | 3.922759                | -1.350008 | 0.070139  |
| 20               | 8                | 0              | 4.717133                | -1.079574 | 0.949900  |
| 21               | 8                | 0              | 4.101459                | -2.220436 | -0.759358 |
| 22               | 6                | 0              | -3.735709               | -0.800734 | -0.471992 |
| 23               | 6                | 0              | -4.105053               | -1.675475 | 0.723114  |
| 24               | 1                | 0              | -3.769895               | -1.413796 | -1.379962 |
| 25               | 1                | 0              | -4.471938               | 0.008058  | -0.585459 |
| 26               | 6                | 0              | -5.489286               | -2.294964 | 0.560915  |
| 27               | 1                | 0              | -3.350222               | -2.460065 | 0.833395  |
| 28               | 1                | 0              | -4.068831               | -1.065908 | 1.631941  |
| 29               | 1                | 0              | -5.747194               | -2.917602 | 1.420456  |
| 30               | 1                | 0              | -6.257426               | -1.522275 | 0.465311  |
| 31               | 1                | 0              | -5.533327               | -2.923018 | -0.333541 |

## Structure 13j (C<sub>2</sub>H<sub>5</sub>OH)

Energy (Hartrees): -800.668564223

No imaginary frequencies

Standard orientation:

| Center<br>Number | Atomic<br>Number | Atomic<br>Type | Coordinates (Angstroms) |           |           |
|------------------|------------------|----------------|-------------------------|-----------|-----------|
|                  |                  |                | X                       | Y         | Z         |
| 1                | 6                | 0              | 1.776932                | -0.860502 | -1.008860 |
| 2                | 6                | 0              | 0.597440                | -0.135899 | -1.057736 |
| 3                | 6                | 0              | 0.326731                | 0.860975  | -0.111369 |
| 4                | 6                | 0              | 1.265957                | 1.119385  | 0.894134  |
| 5                | 6                | 0              | 2.450886                | 0.402392  | 0.961288  |
| 6                | 6                | 0              | 2.682622                | -0.577631 | 0.005817  |
| 7                | 1                | 0              | 1.991812                | -1.627491 | -1.741121 |
| 8                | 1                | 0              | -0.119741               | -0.338781 | -1.842555 |
| 9                | 1                | 0              | 1.063693                | 1.882100  | 1.636262  |
| 10               | 1                | 0              | 3.176657                | 0.592755  | 1.740834  |
| 11               | 6                | 0              | -0.934029               | 1.634110  | -0.182847 |
| 12               | 6                | 0              | -0.953524               | 2.979619  | -0.129940 |
| 13               | 1                | 0              | -1.889271               | 3.527926  | -0.197427 |
| 14               | 6                | 0              | -2.232330               | 0.968337  | -0.329659 |
| 15               | 1                | 0              | -3.089996               | 1.647341  | -0.431167 |
| 16               | 7                | 0              | -2.386334               | -0.292170 | -0.327976 |
| 17               | 8                | 0              | 0.161925                | 3.718965  | -0.019473 |
| 18               | 1                | 0              | -0.059503               | 4.658283  | -0.037099 |
| 19               | 7                | 0              | 3.928506                | -1.345828 | 0.073683  |
| 20               | 8                | 0              | 4.724538                | -1.080292 | 0.954483  |
| 21               | 8                | 0              | 4.113435                | -2.218144 | -0.753469 |
| 22               | 6                | 0              | -3.743350               | -0.799818 | -0.468279 |
| 23               | 6                | 0              | -4.130813               | -1.666005 | 0.726732  |
| 24               | 1                | 0              | -3.779002               | -1.415105 | -1.374613 |
| 25               | 1                | 0              | -4.470911               | 0.015475  | -0.590056 |
| 26               | 6                | 0              | -5.522380               | -2.267769 | 0.558315  |
| 27               | 1                | 0              | -3.387694               | -2.460702 | 0.843998  |
| 28               | 1                | 0              | -4.092186               | -1.054714 | 1.634498  |
| 29               | 1                | 0              | -5.791105               | -2.887750 | 1.416607  |
| 30               | 1                | 0              | -6.280965               | -1.485781 | 0.460622  |
| 31               | 1                | 0              | -5.571021               | -2.894976 | -0.336630 |

## Structure 13k (vacuum)

Energy (Hartrees): -800.640585529

No imaginary frequencies

Standard orientation:

| Center<br>Number | Atomic<br>Number | Atomic<br>Type | Coordinates (Angstroms) |           |           |
|------------------|------------------|----------------|-------------------------|-----------|-----------|
|                  |                  |                | X                       | Y         | Z         |
| 1                | 6                | 0              | 1.924734                | -0.813671 | -0.918110 |
| 2                | 6                | 0              | 0.683492                | -0.199916 | -0.958347 |
| 3                | 6                | 0              | 0.375892                | 0.850210  | -0.083967 |
| 4                | 6                | 0              | 1.334596                | 1.250169  | 0.854051  |
| 5                | 6                | 0              | 2.584376                | 0.649677  | 0.904026  |
| 6                | 6                | 0              | 2.856838                | -0.373319 | 0.011233  |
| 7                | 1                | 0              | 2.181291                | -1.620465 | -1.591128 |
| 8                | 1                | 0              | -0.059134               | -0.534019 | -1.668971 |
| 9                | 1                | 0              | 1.089638                | 2.024893  | 1.571015  |
| 10               | 1                | 0              | 3.333481                | 0.948946  | 1.624411  |
| 11               | 6                | 0              | -0.927142               | 1.550317  | -0.161200 |
| 12               | 6                | 0              | -0.945929               | 2.891900  | -0.096488 |
| 13               | 1                | 0              | -0.025395               | 3.464825  | -0.031250 |
| 14               | 6                | 0              | -2.193429               | 0.815595  | -0.313875 |
| 15               | 1                | 0              | -3.092514               | 1.439961  | -0.381065 |
| 16               | 7                | 0              | -2.252164               | -0.449361 | -0.359117 |
| 17               | 8                | 0              | -2.098537               | 3.602535  | -0.118758 |
| 18               | 1                | 0              | -1.910194               | 4.541290  | -0.176096 |
| 19               | 7                | 0              | 4.181051                | -1.022128 | 0.055839  |
| 20               | 8                | 0              | 4.978901                | -0.614662 | 0.873363  |
| 21               | 8                | 0              | 4.392847                | -1.921383 | -0.729166 |
| 22               | 6                | 0              | -3.565266               | -1.054656 | -0.482899 |
| 23               | 6                | 0              | -3.867281               | -1.933763 | 0.728998  |
| 24               | 1                | 0              | -3.561622               | -1.681586 | -1.381434 |
| 25               | 1                | 0              | -4.356746               | -0.298943 | -0.604142 |
| 26               | 6                | 0              | -5.210588               | -2.644115 | 0.589156  |
| 27               | 1                | 0              | -3.057885               | -2.659311 | 0.843195  |
| 28               | 1                | 0              | -3.859902               | -1.307879 | 1.626503  |
| 29               | 1                | 0              | -5.423105               | -3.264848 | 1.461062  |
| 30               | 1                | 0              | -6.026894               | -1.924591 | 0.484305  |
| 31               | 1                | 0              | -5.220682               | -3.290340 | -0.292432 |



## Structure 13k (CHCl<sub>3</sub>)

Energy (Hartrees): -800.664580150

No imaginary frequencies

Standard orientation:

| Center<br>Number | Atomic<br>Number | Atomic<br>Type | Coordinates (Angstroms) |           |           |
|------------------|------------------|----------------|-------------------------|-----------|-----------|
|                  |                  |                | X                       | Y         | Z         |
| 1                | 6                | 0              | 1.942671                | -0.820805 | -0.922213 |
| 2                | 6                | 0              | 0.702733                | -0.205614 | -0.968115 |
| 3                | 6                | 0              | 0.388875                | 0.846366  | -0.095928 |
| 4                | 6                | 0              | 1.346907                | 1.252356  | 0.842175  |
| 5                | 6                | 0              | 2.596013                | 0.652624  | 0.897750  |
| 6                | 6                | 0              | 2.871687                | -0.376876 | 0.010752  |
| 7                | 1                | 0              | 2.192861                | -1.627637 | -1.598054 |
| 8                | 1                | 0              | -0.029372               | -0.537941 | -1.691680 |
| 9                | 1                | 0              | 1.105228                | 2.035667  | 1.550867  |
| 10               | 1                | 0              | 3.336648                | 0.964233  | 1.622097  |
| 11               | 6                | 0              | -0.916876               | 1.540113  | -0.176530 |
| 12               | 6                | 0              | -0.941947               | 2.884099  | -0.092644 |
| 13               | 1                | 0              | -0.027826               | 3.464814  | -0.008488 |
| 14               | 6                | 0              | -2.177520               | 0.803332  | -0.346838 |
| 15               | 1                | 0              | -3.068997               | 1.424033  | -0.495026 |
| 16               | 7                | 0              | -2.252936               | -0.463281 | -0.314759 |
| 17               | 8                | 0              | -2.091124               | 3.586811  | -0.119203 |
| 18               | 1                | 0              | -1.900104               | 4.531630  | -0.123164 |
| 19               | 7                | 0              | 4.188909                | -1.024204 | 0.064852  |
| 20               | 8                | 0              | 4.996999                | -0.607770 | 0.871252  |
| 21               | 8                | 0              | 4.406835                | -1.942220 | -0.700534 |
| 22               | 6                | 0              | -3.570298               | -1.058132 | -0.472207 |
| 23               | 6                | 0              | -3.925795               | -1.913612 | 0.741499  |
| 24               | 1                | 0              | -3.544810               | -1.699782 | -1.360329 |
| 25               | 1                | 0              | -4.345137               | -0.293825 | -0.631209 |
| 26               | 6                | 0              | -5.283369               | -2.589081 | 0.575625  |
| 27               | 1                | 0              | -3.143008               | -2.663886 | 0.884757  |
| 28               | 1                | 0              | -3.926364               | -1.278246 | 1.632869  |
| 29               | 1                | 0              | -5.529769               | -3.200193 | 1.446541  |
| 30               | 1                | 0              | -6.079202               | -1.849316 | 0.451128  |
| 31               | 1                | 0              | -5.292133               | -3.240350 | -0.303042 |

## Structure 13k (DMSO)

Energy (Hartrees): -800.662543619

No imaginary frequencies

Standard orientation:

| Center<br>Number | Atomic<br>Number | Atomic<br>Type | Coordinates (Angstroms) |           |           |
|------------------|------------------|----------------|-------------------------|-----------|-----------|
|                  |                  |                | X                       | Y         | Z         |
| 1                | 6                | 0              | 1.944409                | -0.820970 | -0.925086 |
| 2                | 6                | 0              | 0.705764                | -0.203198 | -0.972943 |
| 3                | 6                | 0              | 0.392110                | 0.849315  | -0.100473 |
| 4                | 6                | 0              | 1.350598                | 1.256810  | 0.836835  |
| 5                | 6                | 0              | 2.598509                | 0.654916  | 0.893683  |
| 6                | 6                | 0              | 2.872756                | -0.378228 | 0.009760  |
| 7                | 1                | 0              | 2.191632                | -1.626736 | -1.603583 |
| 8                | 1                | 0              | -0.022703               | -0.531418 | -1.702668 |
| 9                | 1                | 0              | 1.112883                | 2.046044  | 1.540469  |
| 10               | 1                | 0              | 3.337119                | 0.970936  | 1.618161  |
| 11               | 6                | 0              | -0.913873               | 1.541460  | -0.180394 |
| 12               | 6                | 0              | -0.938543               | 2.886107  | -0.090986 |
| 13               | 1                | 0              | -0.024320               | 3.465671  | 0.000959  |
| 14               | 6                | 0              | -2.172483               | 0.803346  | -0.350360 |
| 15               | 1                | 0              | -3.062907               | 1.419610  | -0.518492 |
| 16               | 7                | 0              | -2.252100               | -0.463331 | -0.295914 |
| 17               | 8                | 0              | -2.086286               | 3.587420  | -0.118611 |
| 18               | 1                | 0              | -1.891227               | 4.532349  | -0.104823 |
| 19               | 7                | 0              | 4.187054                | -1.029344 | 0.067248  |
| 20               | 8                | 0              | 5.003331                | -0.602414 | 0.861126  |
| 21               | 8                | 0              | 4.396985                | -1.963464 | -0.682443 |
| 22               | 6                | 0              | -3.570691               | -1.056070 | -0.463654 |
| 23               | 6                | 0              | -3.931932               | -1.923010 | 0.739553  |
| 24               | 1                | 0              | -3.543226               | -1.688978 | -1.358198 |
| 25               | 1                | 0              | -4.342858               | -0.288863 | -0.617958 |
| 26               | 6                | 0              | -5.299008               | -2.577068 | 0.568605  |
| 27               | 1                | 0              | -3.160182               | -2.687587 | 0.870524  |
| 28               | 1                | 0              | -3.922645               | -1.299886 | 1.639725  |
| 29               | 1                | 0              | -5.548129               | -3.203365 | 1.428065  |
| 30               | 1                | 0              | -6.084663               | -1.823328 | 0.464966  |
| 31               | 1                | 0              | -5.321375               | -3.208522 | -0.324298 |

## Structure 13k (C<sub>2</sub>H<sub>5</sub>OH)

Energy (Hartrees): -800.666893927

No imaginary frequencies

Standard orientation:

| Center<br>Number | Atomic<br>Number | Atomic<br>Type | Coordinates (Angstroms) |           |           |
|------------------|------------------|----------------|-------------------------|-----------|-----------|
|                  |                  |                | X                       | Y         | Z         |
| 1                | 6                | 0              | 1.953459                | -0.824878 | -0.926830 |
| 2                | 6                | 0              | 0.714667                | -0.208650 | -0.975713 |
| 3                | 6                | 0              | 0.396787                | 0.840541  | -0.100357 |
| 4                | 6                | 0              | 1.352246                | 1.246242  | 0.841436  |
| 5                | 6                | 0              | 2.600901                | 0.647399  | 0.899414  |
| 6                | 6                | 0              | 2.878612                | -0.382656 | 0.012118  |
| 7                | 1                | 0              | 2.203622                | -1.627109 | -1.608460 |
| 8                | 1                | 0              | -0.010188               | -0.533874 | -1.710352 |
| 9                | 1                | 0              | 1.110758                | 2.031691  | 1.547982  |
| 10               | 1                | 0              | 3.336565                | 0.962636  | 1.627456  |
| 11               | 6                | 0              | -0.908370               | 1.532933  | -0.182934 |
| 12               | 6                | 0              | -0.929917               | 2.878296  | -0.093743 |
| 13               | 1                | 0              | -0.016233               | 3.458143  | -0.001286 |
| 14               | 6                | 0              | -2.168143               | 0.798323  | -0.356091 |
| 15               | 1                | 0              | -3.052820               | 1.417827  | -0.542295 |
| 16               | 7                | 0              | -2.257420               | -0.467229 | -0.284054 |
| 17               | 8                | 0              | -2.073793               | 3.585721  | -0.122705 |
| 18               | 1                | 0              | -1.878021               | 4.530567  | -0.111507 |
| 19               | 7                | 0              | 4.191158                | -1.026644 | 0.068314  |
| 20               | 8                | 0              | 5.010830                | -0.599403 | 0.859775  |
| 21               | 8                | 0              | 4.410089                | -1.960947 | -0.679946 |
| 22               | 6                | 0              | -3.580030               | -1.049969 | -0.459235 |
| 23               | 6                | 0              | -3.960856               | -1.910126 | 0.742225  |
| 24               | 1                | 0              | -3.551021               | -1.685335 | -1.351969 |
| 25               | 1                | 0              | -4.344113               | -0.276974 | -0.623753 |
| 26               | 6                | 0              | -5.332750               | -2.551699 | 0.560682  |
| 27               | 1                | 0              | -3.198113               | -2.682123 | 0.882143  |
| 28               | 1                | 0              | -3.953970               | -1.285466 | 1.641482  |
| 29               | 1                | 0              | -5.593906               | -3.174801 | 1.419024  |
| 30               | 1                | 0              | -6.111239               | -1.791341 | 0.450484  |
| 31               | 1                | 0              | -5.354140               | -3.184224 | -0.331596 |

## Structure 131 (vacuum)

Energy (Hartrees): -800.639343435

No imaginary frequencies

Standard orientation:

| Center<br>Number | Atomic<br>Number | Atomic<br>Type | Coordinates (Angstroms) |           |           |
|------------------|------------------|----------------|-------------------------|-----------|-----------|
|                  |                  |                | X                       | Y         | Z         |
| 1                | 6                | 0              | 1.923284                | -0.799703 | -0.932881 |
| 2                | 6                | 0              | 0.685469                | -0.179691 | -0.974739 |
| 3                | 6                | 0              | 0.374525                | 0.858952  | -0.088499 |
| 4                | 6                | 0              | 1.326865                | 1.244043  | 0.861218  |
| 5                | 6                | 0              | 2.573826                | 0.637313  | 0.913240  |
| 6                | 6                | 0              | 2.848970                | -0.375731 | 0.010284  |
| 7                | 1                | 0              | 2.182434                | -1.597864 | -1.615103 |
| 8                | 1                | 0              | -0.050451               | -0.500484 | -1.698784 |
| 9                | 1                | 0              | 1.081031                | 2.014221  | 1.582723  |
| 10               | 1                | 0              | 3.318770                | 0.925319  | 1.642503  |
| 11               | 6                | 0              | -0.926626               | 1.567132  | -0.166940 |
| 12               | 6                | 0              | -0.922681               | 2.913857  | -0.098928 |
| 13               | 1                | 0              | 0.008621                | 3.465458  | -0.039432 |
| 14               | 6                | 0              | -2.177758               | 0.816285  | -0.328434 |
| 15               | 1                | 0              | -3.099976               | 1.406378  | -0.462303 |
| 16               | 7                | 0              | -2.242617               | -0.447957 | -0.328342 |
| 17               | 8                | 0              | -1.973216               | 3.753740  | -0.111789 |
| 18               | 1                | 0              | -2.806902               | 3.274727  | -0.110413 |
| 19               | 7                | 0              | 4.169440                | -1.032593 | 0.058206  |
| 20               | 8                | 0              | 4.962443                | -0.639144 | 0.886841  |
| 21               | 8                | 0              | 4.381980                | -1.924238 | -0.735208 |
| 22               | 6                | 0              | -3.547420               | -1.063099 | -0.477035 |
| 23               | 6                | 0              | -3.875077               | -1.930331 | 0.736681  |
| 24               | 1                | 0              | -3.518222               | -1.699202 | -1.368501 |
| 25               | 1                | 0              | -4.340870               | -0.313433 | -0.627603 |
| 26               | 6                | 0              | -5.215724               | -2.640871 | 0.574796  |
| 27               | 1                | 0              | -3.068756               | -2.655132 | 0.873381  |
| 28               | 1                | 0              | -3.885215               | -1.297096 | 1.628959  |
| 29               | 1                | 0              | -5.445071               | -3.254965 | 1.446940  |
| 30               | 1                | 0              | -6.029825               | -1.922211 | 0.449101  |
| 31               | 1                | 0              | -5.208901               | -3.293655 | -0.301851 |

### Structure 131 (CHCl<sub>3</sub>)

Energy (Hartrees): -800.662668044

No imaginary frequencies

Standard orientation:

| Center<br>Number | Atomic<br>Number | Atomic<br>Type | Coordinates (Angstroms) |           |           |
|------------------|------------------|----------------|-------------------------|-----------|-----------|
|                  |                  |                | X                       | Y         | Z         |
| 1                | 6                | 0              | 1.932222                | -0.805639 | -0.935900 |
| 2                | 6                | 0              | 0.696157                | -0.183232 | -0.980013 |
| 3                | 6                | 0              | 0.382573                | 0.856924  | -0.094063 |
| 4                | 6                | 0              | 1.335188                | 1.243917  | 0.856300  |
| 5                | 6                | 0              | 2.581100                | 0.636446  | 0.910690  |
| 6                | 6                | 0              | 2.856997                | -0.380621 | 0.010019  |
| 7                | 1                | 0              | 2.183040                | -1.602708 | -1.622937 |
| 8                | 1                | 0              | -0.032401               | -0.500649 | -1.714107 |
| 9                | 1                | 0              | 1.093669                | 2.019779  | 1.573195  |
| 10               | 1                | 0              | 3.318947                | 0.933530  | 1.643920  |
| 11               | 6                | 0              | -0.919528               | 1.562588  | -0.176840 |
| 12               | 6                | 0              | -0.913449               | 2.910128  | -0.095666 |
| 13               | 1                | 0              | 0.018154                | 3.460894  | -0.021328 |
| 14               | 6                | 0              | -2.169782               | 0.812810  | -0.356575 |
| 15               | 1                | 0              | -3.075248               | 1.397939  | -0.574550 |
| 16               | 7                | 0              | -2.242137               | -0.451097 | -0.278931 |
| 17               | 8                | 0              | -1.961275               | 3.748987  | -0.110609 |
| 18               | 1                | 0              | -2.804191               | 3.278613  | -0.114345 |
| 19               | 7                | 0              | 4.170762                | -1.035879 | 0.062196  |
| 20               | 8                | 0              | 4.976859                | -0.634576 | 0.877917  |
| 21               | 8                | 0              | 4.386966                | -1.945036 | -0.714113 |
| 22               | 6                | 0              | -3.544773               | -1.067741 | -0.466009 |
| 23               | 6                | 0              | -3.922887               | -1.909693 | 0.750321  |
| 24               | 1                | 0              | -3.481950               | -1.722934 | -1.342256 |
| 25               | 1                | 0              | -4.326402               | -0.318428 | -0.661902 |
| 26               | 6                | 0              | -5.263055               | -2.610970 | 0.554169  |
| 27               | 1                | 0              | -3.132133               | -2.643920 | 0.927922  |
| 28               | 1                | 0              | -3.960400               | -1.261151 | 1.631368  |
| 29               | 1                | 0              | -5.524156               | -3.213208 | 1.426863  |
| 30               | 1                | 0              | -6.067875               | -1.887793 | 0.395015  |
| 31               | 1                | 0              | -5.234407               | -3.275627 | -0.313871 |

## Structure 131 (DMSO)

Energy (Hartrees): -800.661009085

No imaginary frequencies

Standard orientation:

| Center<br>Number | Atomic<br>Number | Atomic<br>Type | Coordinates (Angstroms) |           |           |
|------------------|------------------|----------------|-------------------------|-----------|-----------|
|                  |                  |                | X                       | Y         | Z         |
| 1                | 6                | 0              | 1.937468                | -0.799947 | -0.942814 |
| 2                | 6                | 0              | 0.702103                | -0.175970 | -0.989470 |
| 3                | 6                | 0              | 0.385598                | 0.860686  | -0.099681 |
| 4                | 6                | 0              | 1.335909                | 1.246028  | 0.854030  |
| 5                | 6                | 0              | 2.581104                | 0.637515  | 0.910387  |
| 6                | 6                | 0              | 2.858806                | -0.378967 | 0.008894  |
| 7                | 1                | 0              | 2.187463                | -1.593206 | -1.634831 |
| 8                | 1                | 0              | -0.021149               | -0.486833 | -1.732126 |
| 9                | 1                | 0              | 1.094904                | 2.023245  | 1.569836  |
| 10               | 1                | 0              | 3.314475                | 0.935949  | 1.647506  |
| 11               | 6                | 0              | -0.917661               | 1.562296  | -0.180865 |
| 12               | 6                | 0              | -0.916602               | 2.909699  | -0.091059 |
| 13               | 1                | 0              | 0.012272                | 3.463883  | -0.006784 |
| 14               | 6                | 0              | -2.166642               | 0.811224  | -0.358953 |
| 15               | 1                | 0              | -3.072703               | 1.392167  | -0.580900 |
| 16               | 7                | 0              | -2.239457               | -0.453148 | -0.271320 |
| 17               | 8                | 0              | -1.969586               | 3.739668  | -0.104753 |
| 18               | 1                | 0              | -2.807966               | 3.259193  | -0.129401 |
| 19               | 7                | 0              | 4.170427                | -1.036432 | 0.065111  |
| 20               | 8                | 0              | 4.982065                | -0.626511 | 0.872392  |
| 21               | 8                | 0              | 4.382022                | -1.958245 | -0.699035 |
| 22               | 6                | 0              | -3.545590               | -1.066163 | -0.460391 |
| 23               | 6                | 0              | -3.917855               | -1.926014 | 0.744462  |
| 24               | 1                | 0              | -3.489513               | -1.707266 | -1.347657 |
| 25               | 1                | 0              | -4.325461               | -0.312002 | -0.638867 |
| 26               | 6                | 0              | -5.273913               | -2.597425 | 0.555189  |
| 27               | 1                | 0              | -3.139843               | -2.680366 | 0.895432  |
| 28               | 1                | 0              | -3.931488               | -1.294846 | 1.638864  |
| 29               | 1                | 0              | -5.530077               | -3.219276 | 1.415765  |
| 30               | 1                | 0              | -6.066469               | -1.854007 | 0.431798  |
| 31               | 1                | 0              | -5.273590               | -3.236644 | -0.332397 |

**Structure 13l (C<sub>2</sub>H<sub>5</sub>OH)**

Energy (Hartrees): -800.664806763

No imaginary frequencies

Standard orientation:

| Center<br>Number | Atomic<br>Number | Atomic<br>Type | Coordinates (Angstroms) |           |           |
|------------------|------------------|----------------|-------------------------|-----------|-----------|
|                  |                  |                | X                       | Y         | Z         |
| 1                | 6                | 0              | 1.950287                | -0.785764 | -0.958978 |
| 2                | 6                | 0              | 0.715292                | -0.162538 | -1.008117 |
| 3                | 6                | 0              | 0.387062                | 0.857552  | -0.103224 |
| 4                | 6                | 0              | 1.326280                | 1.228065  | 0.867484  |
| 5                | 6                | 0              | 2.571924                | 0.621703  | 0.926747  |
| 6                | 6                | 0              | 2.860236                | -0.379095 | 0.010483  |
| 7                | 1                | 0              | 2.209884                | -1.565251 | -1.663114 |
| 8                | 1                | 0              | 0.001868                | -0.459077 | -1.766027 |
| 9                | 1                | 0              | 1.074988                | 1.991116  | 1.594890  |
| 10               | 1                | 0              | 3.295702                | 0.907887  | 1.678259  |
| 11               | 6                | 0              | -0.917234               | 1.557069  | -0.186177 |
| 12               | 6                | 0              | -0.914547               | 2.903966  | -0.088196 |
| 13               | 1                | 0              | 0.015846                | 3.454995  | 0.002098  |
| 14               | 6                | 0              | -2.163507               | 0.802891  | -0.370291 |
| 15               | 1                | 0              | -3.065299               | 1.384421  | -0.602873 |
| 16               | 7                | 0              | -2.235917               | -0.461276 | -0.270378 |
| 17               | 8                | 0              | -1.964743               | 3.740510  | -0.100121 |
| 18               | 1                | 0              | -2.810498               | 3.274347  | -0.123173 |
| 19               | 7                | 0              | 4.168778                | -1.032256 | 0.068253  |
| 20               | 8                | 0              | 4.985022                | -0.620435 | 0.871137  |
| 21               | 8                | 0              | 4.386696                | -1.958248 | -0.690342 |
| 22               | 6                | 0              | -3.542859               | -1.072640 | -0.462419 |
| 23               | 6                | 0              | -3.931242               | -1.916086 | 0.748615  |
| 24               | 1                | 0              | -3.482033               | -1.724734 | -1.341236 |
| 25               | 1                | 0              | -4.318351               | -0.318263 | -0.658102 |
| 26               | 6                | 0              | -5.288770               | -2.583693 | 0.554880  |
| 27               | 1                | 0              | -3.158616               | -2.672502 | 0.916241  |
| 28               | 1                | 0              | -3.950621               | -1.274613 | 1.635713  |
| 29               | 1                | 0              | -5.554989               | -3.194093 | 1.420746  |
| 30               | 1                | 0              | -6.077476               | -1.838767 | 0.415957  |
| 31               | 1                | 0              | -5.283758               | -3.233931 | -0.324731 |

## Structure 14a (vacuum)

Energy (Hartrees): -953.069476715

No imaginary frequencies

Standard orientation:

| Center<br>Number | Atomic<br>Number | Atomic<br>Type | Coordinates (Angstroms) |           |           |
|------------------|------------------|----------------|-------------------------|-----------|-----------|
|                  |                  |                | X                       | Y         | Z         |
| 1                | 6                | 0              | -2.770801               | 1.444405  | -0.025800 |
| 2                | 6                | 0              | -4.011462               | 0.827875  | -0.003151 |
| 3                | 6                | 0              | -4.064266               | -0.557289 | 0.039166  |
| 4                | 6                | 0              | -2.916965               | -1.337352 | 0.049880  |
| 5                | 6                | 0              | -1.685162               | -0.705164 | 0.007704  |
| 6                | 6                | 0              | -1.584677               | 0.694197  | -0.022058 |
| 7                | 1                | 0              | -2.720909               | 2.526622  | -0.017843 |
| 8                | 1                | 0              | -4.929799               | 1.399431  | -0.000365 |
| 9                | 1                | 0              | -3.003586               | -2.415431 | 0.068665  |
| 10               | 1                | 0              | -0.784774               | -1.307590 | -0.033828 |
| 11               | 6                | 0              | -0.274266               | 1.367142  | -0.057520 |
| 12               | 6                | 0              | 0.783044                | 0.874460  | 0.676918  |
| 13               | 6                | 0              | -0.086333               | 2.539981  | -0.886192 |
| 14               | 1                | 0              | 0.633546                | -0.009490 | 1.295292  |
| 15               | 1                | 0              | -0.957295               | 2.846841  | -1.491817 |
| 16               | 8                | 0              | 0.957996                | 3.172127  | -0.974327 |
| 17               | 7                | 0              | 2.009176                | 1.393869  | 0.734684  |
| 18               | 1                | 0              | 2.181464                | 2.203651  | 0.142315  |
| 19               | 7                | 0              | -5.377931               | -1.221873 | 0.070037  |
| 20               | 8                | 0              | -5.393361               | -2.434420 | 0.100905  |
| 21               | 8                | 0              | -6.364853               | -0.517258 | 0.062935  |
| 22               | 6                | 0              | 3.104137                | 0.742156  | 1.421175  |
| 23               | 1                | 0              | 2.687994                | 0.176742  | 2.260920  |
| 24               | 1                | 0              | 3.752704                | 1.510358  | 1.848228  |
| 25               | 6                | 0              | 3.925875                | -0.186531 | 0.543160  |
| 26               | 6                | 0              | 3.497108                | -0.584131 | -0.719664 |
| 27               | 6                | 0              | 5.139481                | -0.671026 | 1.034081  |
| 28               | 6                | 0              | 4.268867                | -1.461604 | -1.478599 |
| 29               | 1                | 0              | 2.565782                | -0.202718 | -1.123533 |
| 30               | 6                | 0              | 5.907557                | -1.546973 | 0.278996  |
| 31               | 1                | 0              | 5.484839                | -0.357389 | 2.014614  |
| 32               | 6                | 0              | 5.472082                | -1.946111 | -0.982331 |
| 33               | 1                | 0              | 3.927369                | -1.761752 | -2.462104 |
| 34               | 1                | 0              | 6.848499                | -1.914955 | 0.670900  |
| 35               | 1                | 0              | 6.071868                | -2.626089 | -1.575181 |



## Structure 14a (CHCl<sub>3</sub>)

Energy (Hartrees): -953.095846834

No imaginary frequencies

Standard orientation:

| Center<br>Number | Atomic<br>Number | Atomic<br>Type | Coordinates (Angstroms) |           |           |
|------------------|------------------|----------------|-------------------------|-----------|-----------|
|                  |                  |                | X                       | Y         | Z         |
| 1                | 6                | 0              | -2.749144               | 1.352497  | 0.283670  |
| 2                | 6                | 0              | -4.104398               | 1.082800  | 0.373503  |
| 3                | 6                | 0              | -4.553848               | -0.191367 | 0.051199  |
| 4                | 6                | 0              | -3.685921               | -1.192375 | -0.366791 |
| 5                | 6                | 0              | -2.336739               | -0.901049 | -0.466873 |
| 6                | 6                | 0              | -1.835898               | 0.370173  | -0.137657 |
| 7                | 1                | 0              | -2.391548               | 2.333339  | 0.574005  |
| 8                | 1                | 0              | -4.803395               | 1.838741  | 0.706314  |
| 9                | 1                | 0              | -4.067877               | -2.170562 | -0.627191 |
| 10               | 1                | 0              | -1.662452               | -1.665819 | -0.834386 |
| 11               | 6                | 0              | -0.398170               | 0.669278  | -0.228664 |
| 12               | 6                | 0              | 0.533746                | -0.303431 | 0.102141  |
| 13               | 6                | 0              | 0.039457                | 1.969409  | -0.666393 |
| 14               | 1                | 0              | 0.184760                | -1.272309 | 0.455516  |
| 15               | 1                | 0              | -0.755938               | 2.677313  | -0.954627 |
| 16               | 8                | 0              | 1.214638                | 2.320218  | -0.764172 |
| 17               | 7                | 0              | 1.850179                | -0.172126 | 0.059385  |
| 18               | 1                | 0              | 2.223907                | 0.722432  | -0.248723 |
| 19               | 7                | 0              | -5.984314               | -0.487829 | 0.148569  |
| 20               | 8                | 0              | -6.360490               | -1.602512 | -0.159720 |
| 21               | 8                | 0              | -6.727600               | 0.394303  | 0.532966  |
| 22               | 6                | 0              | 2.766833                | -1.240714 | 0.470428  |
| 23               | 1                | 0              | 2.571718                | -2.128391 | -0.137061 |
| 24               | 1                | 0              | 2.577072                | -1.491428 | 1.517305  |
| 25               | 6                | 0              | 4.193903                | -0.789865 | 0.296217  |
| 26               | 6                | 0              | 4.849265                | -0.974834 | -0.921179 |
| 27               | 6                | 0              | 4.857331                | -0.141404 | 1.338072  |
| 28               | 6                | 0              | 6.153264                | -0.521263 | -1.094140 |
| 29               | 1                | 0              | 4.335169                | -1.477713 | -1.734487 |
| 30               | 6                | 0              | 6.161316                | 0.312657  | 1.167282  |
| 31               | 1                | 0              | 4.349381                | 0.006022  | 2.286011  |
| 32               | 6                | 0              | 6.810967                | 0.122346  | -0.049138 |
| 33               | 1                | 0              | 6.656132                | -0.672099 | -2.042547 |
| 34               | 1                | 0              | 6.670260                | 0.812634  | 1.983508  |
| 35               | 1                | 0              | 7.827597                | 0.474315  | -0.181984 |

## Structure 14a (DMSO)

Energy (Hartrees): -953.094319172

No imaginary frequencies

Standard orientation:

| Center<br>Number | Atomic<br>Number | Atomic<br>Type | Coordinates (Angstroms) |           |           |
|------------------|------------------|----------------|-------------------------|-----------|-----------|
|                  |                  |                | X                       | Y         | Z         |
| 1                | 6                | 0              | -2.754107               | 1.360679  | 0.272458  |
| 2                | 6                | 0              | -4.108653               | 1.086064  | 0.353519  |
| 3                | 6                | 0              | -4.550670               | -0.194400 | 0.043460  |
| 4                | 6                | 0              | -3.673153               | -1.197305 | -0.352002 |
| 5                | 6                | 0              | -2.324729               | -0.901797 | -0.444445 |
| 6                | 6                | 0              | -1.832078               | 0.377041  | -0.128778 |
| 7                | 1                | 0              | -2.405867               | 2.346877  | 0.555223  |
| 8                | 1                | 0              | -4.810091               | 1.845778  | 0.672409  |
| 9                | 1                | 0              | -4.044377               | -2.182463 | -0.601632 |
| 10               | 1                | 0              | -1.644712               | -1.671558 | -0.790286 |
| 11               | 6                | 0              | -0.395666               | 0.680226  | -0.211439 |
| 12               | 6                | 0              | 0.535032                | -0.300956 | 0.108637  |
| 13               | 6                | 0              | 0.040103                | 1.985818  | -0.630254 |
| 14               | 1                | 0              | 0.184643                | -1.275197 | 0.444038  |
| 15               | 1                | 0              | -0.756298               | 2.694673  | -0.912409 |
| 16               | 8                | 0              | 1.215177                | 2.343673  | -0.721381 |
| 17               | 7                | 0              | 1.849650                | -0.170089 | 0.074428  |
| 18               | 1                | 0              | 2.228442                | 0.727618  | -0.216027 |
| 19               | 7                | 0              | -5.978392               | -0.495914 | 0.133601  |
| 20               | 8                | 0              | -6.344594               | -1.627141 | -0.128008 |
| 21               | 8                | 0              | -6.735676               | 0.397877  | 0.464842  |
| 22               | 6                | 0              | 2.763327                | -1.242906 | 0.484476  |
| 23               | 1                | 0              | 2.557138                | -2.130351 | -0.118414 |
| 24               | 1                | 0              | 2.579671                | -1.484870 | 1.534036  |
| 25               | 6                | 0              | 4.189244                | -0.795652 | 0.295324  |
| 26               | 6                | 0              | 4.832596                | -0.983777 | -0.928513 |
| 27               | 6                | 0              | 4.863277                | -0.144592 | 1.329176  |
| 28               | 6                | 0              | 6.134910                | -0.529541 | -1.115736 |
| 29               | 1                | 0              | 4.310887                | -1.490921 | -1.734377 |
| 30               | 6                | 0              | 6.165604                | 0.310245  | 1.144003  |
| 31               | 1                | 0              | 4.364979                | 0.002659  | 2.282387  |
| 32               | 6                | 0              | 6.802927                | 0.118440  | -0.079326 |
| 33               | 1                | 0              | 6.628765                | -0.683673 | -2.068599 |
| 34               | 1                | 0              | 6.682895                | 0.811942  | 1.954181  |
| 35               | 1                | 0              | 7.818073                | 0.470716  | -0.223717 |

## Structure 14a (C<sub>2</sub>H<sub>5</sub>OH)

Energy (Hartrees): -953.096123410

No imaginary frequencies

Standard orientation:

| Center<br>Number | Atomic<br>Number | Atomic<br>Type | Coordinates (Angstroms) |           |           |
|------------------|------------------|----------------|-------------------------|-----------|-----------|
|                  |                  |                | X                       | Y         | Z         |
| 1                | 6                | 0              | -2.753793               | 1.362261  | 0.278641  |
| 2                | 6                | 0              | -4.106536               | 1.084627  | 0.369492  |
| 3                | 6                | 0              | -4.548119               | -0.193702 | 0.047770  |
| 4                | 6                | 0              | -3.673875               | -1.191163 | -0.369647 |
| 5                | 6                | 0              | -2.327088               | -0.892417 | -0.468105 |
| 6                | 6                | 0              | -1.834833               | 0.383391  | -0.140450 |
| 7                | 1                | 0              | -2.403673               | 2.345814  | 0.568729  |
| 8                | 1                | 0              | -4.806091               | 1.839690  | 0.703477  |
| 9                | 1                | 0              | -4.045350               | -2.173765 | -0.629171 |
| 10               | 1                | 0              | -1.648204               | -1.656280 | -0.829084 |
| 11               | 6                | 0              | -0.398838               | 0.687540  | -0.230693 |
| 12               | 6                | 0              | 0.533971                | -0.296571 | 0.086662  |
| 13               | 6                | 0              | 0.031595                | 1.986557  | -0.652490 |
| 14               | 1                | 0              | 0.181985                | -1.267800 | 0.429184  |
| 15               | 1                | 0              | -0.762384               | 2.698941  | -0.927496 |
| 16               | 8                | 0              | 1.212245                | 2.343684  | -0.754716 |
| 17               | 7                | 0              | 1.846210                | -0.170355 | 0.043189  |
| 18               | 1                | 0              | 2.228836                | 0.722180  | -0.259209 |
| 19               | 7                | 0              | -5.969311               | -0.499665 | 0.152738  |
| 20               | 8                | 0              | -6.345939               | -1.617507 | -0.151949 |
| 21               | 8                | 0              | -6.724570               | 0.373292  | 0.541956  |
| 22               | 6                | 0              | 2.758692                | -1.250723 | 0.440319  |
| 23               | 1                | 0              | 2.564729                | -2.123735 | -0.187272 |
| 24               | 1                | 0              | 2.556475                | -1.518869 | 1.479852  |
| 25               | 6                | 0              | 4.186571                | -0.797512 | 0.285452  |
| 26               | 6                | 0              | 4.854298                | -0.972168 | -0.926979 |
| 27               | 6                | 0              | 4.839514                | -0.158416 | 1.340145  |
| 28               | 6                | 0              | 6.160174                | -0.516202 | -1.083087 |
| 29               | 1                | 0              | 4.348706                | -1.469918 | -1.748923 |
| 30               | 6                | 0              | 6.145407                | 0.297777  | 1.186155  |
| 31               | 1                | 0              | 4.322384                | -0.021391 | 2.284879  |
| 32               | 6                | 0              | 6.807169                | 0.119393  | -0.026102 |
| 33               | 1                | 0              | 6.672813                | -0.659638 | -2.027724 |
| 34               | 1                | 0              | 6.646614                | 0.789988  | 2.012209  |
| 35               | 1                | 0              | 7.825131                | 0.473135  | -0.145763 |

## Structure 14b (vacuum)

Energy (Hartrees): -953.062952189

No imaginary frequencies

Standard orientation:

| Center<br>Number | Atomic<br>Number | Atomic<br>Type | Coordinates (Angstroms) |           |           |
|------------------|------------------|----------------|-------------------------|-----------|-----------|
|                  |                  |                | X                       | Y         | Z         |
| 1                | 6                | 0              | -2.100008               | 0.893273  | 1.118574  |
| 2                | 6                | 0              | -3.153538               | -0.006354 | 1.167695  |
| 3                | 6                | 0              | -3.467609               | -0.722678 | 0.022174  |
| 4                | 6                | 0              | -2.773521               | -0.556413 | -1.166895 |
| 5                | 6                | 0              | -1.729490               | 0.355087  | -1.201229 |
| 6                | 6                | 0              | -1.367147               | 1.089558  | -0.061093 |
| 7                | 1                | 0              | -1.825161               | 1.438568  | 2.013934  |
| 8                | 1                | 0              | -3.719737               | -0.170829 | 2.074560  |
| 9                | 1                | 0              | -3.065699               | -1.122880 | -2.041016 |
| 10               | 1                | 0              | -1.208270               | 0.531564  | -2.135763 |
| 11               | 6                | 0              | -0.257678               | 2.057406  | -0.097586 |
| 12               | 6                | 0              | 0.963481                | 1.796043  | -0.649590 |
| 13               | 6                | 0              | -0.427778               | 3.381446  | 0.510841  |
| 14               | 1                | 0              | 1.697294                | 2.598762  | -0.609643 |
| 15               | 1                | 0              | -1.436695               | 3.573118  | 0.926070  |
| 16               | 8                | 0              | 0.425024                | 4.239924  | 0.570528  |
| 17               | 7                | 0              | 1.383805                | 0.657925  | -1.227262 |
| 18               | 1                | 0              | 0.778743                | -0.151844 | -1.167294 |
| 19               | 7                | 0              | -4.578603               | -1.691005 | 0.067580  |
| 20               | 8                | 0              | -4.826153               | -2.308558 | -0.946184 |
| 21               | 8                | 0              | -5.175837               | -1.810657 | 1.115664  |
| 22               | 6                | 0              | 2.779974                | 0.399796  | -1.542741 |
| 23               | 1                | 0              | 3.279272                | 1.370273  | -1.607227 |
| 24               | 1                | 0              | 2.846898                | -0.061234 | -2.531208 |
| 25               | 6                | 0              | 3.472624                | -0.480848 | -0.522095 |
| 26               | 6                | 0              | 3.261615                | -0.289997 | 0.843711  |
| 27               | 6                | 0              | 4.350078                | -1.477787 | -0.941670 |
| 28               | 6                | 0              | 3.924884                | -1.081637 | 1.773558  |
| 29               | 1                | 0              | 2.573016                | 0.477034  | 1.183337  |
| 30               | 6                | 0              | 5.016386                | -2.269972 | -0.011679 |
| 31               | 1                | 0              | 4.512713                | -1.638579 | -2.002674 |
| 32               | 6                | 0              | 4.804432                | -2.073086 | 1.347915  |
| 33               | 1                | 0              | 3.754191                | -0.925185 | 2.832047  |
| 34               | 1                | 0              | 5.694223                | -3.044349 | -0.350588 |
| 35               | 1                | 0              | 5.318295                | -2.691553 | 2.073839  |

## Structure 14b (CHCl<sub>3</sub>)

Energy (Hartrees): -953.093237638

No imaginary frequencies

Standard orientation:

| Center<br>Number | Atomic<br>Number | Atomic<br>Type | Coordinates (Angstroms) |           |           |
|------------------|------------------|----------------|-------------------------|-----------|-----------|
|                  |                  |                | X                       | Y         | Z         |
| 1                | 6                | 0              | -2.344037               | 0.990767  | 1.015763  |
| 2                | 6                | 0              | -3.349418               | 0.039095  | 1.052996  |
| 3                | 6                | 0              | -3.456940               | -0.853408 | -0.005443 |
| 4                | 6                | 0              | -2.600998               | -0.809691 | -1.098120 |
| 5                | 6                | 0              | -1.612756               | 0.160592  | -1.127366 |
| 6                | 6                | 0              | -1.458389               | 1.075431  | -0.071680 |
| 7                | 1                | 0              | -2.231321               | 1.670258  | 1.852406  |
| 8                | 1                | 0              | -4.029039               | -0.025048 | 1.892374  |
| 9                | 1                | 0              | -2.724325               | -1.509906 | -1.913671 |
| 10               | 1                | 0              | -0.975479               | 0.231829  | -2.001949 |
| 11               | 6                | 0              | -0.424502               | 2.123108  | -0.099389 |
| 12               | 6                | 0              | 0.876015                | 1.928489  | -0.506920 |
| 13               | 6                | 0              | -0.766613               | 3.466472  | 0.342331  |
| 14               | 1                | 0              | 1.526094                | 2.800129  | -0.489710 |
| 15               | 1                | 0              | -1.828908               | 3.610126  | 0.613835  |
| 16               | 8                | 0              | -0.000299               | 4.414919  | 0.409806  |
| 17               | 7                | 0              | 1.458692                | 0.798737  | -0.896799 |
| 18               | 1                | 0              | 0.931590                | -0.066339 | -0.869350 |
| 19               | 7                | 0              | -4.511485               | -1.872290 | 0.027866  |
| 20               | 8                | 0              | -4.532830               | -2.702510 | -0.859770 |
| 21               | 8                | 0              | -5.311581               | -1.836180 | 0.941784  |
| 22               | 6                | 0              | 2.864997                | 0.686442  | -1.261157 |
| 23               | 1                | 0              | 3.311100                | 1.677304  | -1.145911 |
| 24               | 1                | 0              | 2.949801                | 0.406321  | -2.314236 |
| 25               | 6                | 0              | 3.594679                | -0.326402 | -0.405976 |
| 26               | 6                | 0              | 3.456339                | -0.313980 | 0.983549  |
| 27               | 6                | 0              | 4.424437                | -1.275632 | -0.999074 |
| 28               | 6                | 0              | 4.140805                | -1.236912 | 1.765925  |
| 29               | 1                | 0              | 2.807298                | 0.418919  | 1.452933  |
| 30               | 6                | 0              | 5.113970                | -2.198542 | -0.216203 |
| 31               | 1                | 0              | 4.530564                | -1.294495 | -2.079165 |
| 32               | 6                | 0              | 4.971556                | -2.182000 | 1.167089  |
| 33               | 1                | 0              | 4.026069                | -1.220179 | 2.843761  |
| 34               | 1                | 0              | 5.755882                | -2.933563 | -0.688393 |
| 35               | 1                | 0              | 5.503043                | -2.903283 | 1.777106  |

## Structure 14b (DMSO)

Energy (Hartrees): -953.092842635

No imaginary frequencies

Standard orientation:

| Center<br>Number | Atomic<br>Number | Atomic<br>Type | Coordinates (Angstroms) |           |           |
|------------------|------------------|----------------|-------------------------|-----------|-----------|
|                  |                  |                | X                       | Y         | Z         |
| 1                | 6                | 0              | -2.281477               | 1.015782  | 1.017346  |
| 2                | 6                | 0              | -3.321773               | 0.104594  | 1.083663  |
| 3                | 6                | 0              | -3.497673               | -0.780198 | 0.027029  |
| 4                | 6                | 0              | -2.676093               | -0.764367 | -1.092969 |
| 5                | 6                | 0              | -1.652433               | 0.167027  | -1.151424 |
| 6                | 6                | 0              | -1.426311               | 1.068847  | -0.097500 |
| 7                | 1                | 0              | -2.114870               | 1.683289  | 1.854766  |
| 8                | 1                | 0              | -3.972171               | 0.065566  | 1.947564  |
| 9                | 1                | 0              | -2.849376               | -1.453810 | -1.908738 |
| 10               | 1                | 0              | -1.042959               | 0.214033  | -2.046990 |
| 11               | 6                | 0              | -0.344243               | 2.063397  | -0.147637 |
| 12               | 6                | 0              | 0.928051                | 1.810358  | -0.617774 |
| 13               | 6                | 0              | -0.597157               | 3.403982  | 0.352058  |
| 14               | 1                | 0              | 1.630558                | 2.640521  | -0.600967 |
| 15               | 1                | 0              | -1.641856               | 3.591183  | 0.661734  |
| 16               | 8                | 0              | 0.219155                | 4.310439  | 0.433257  |
| 17               | 7                | 0              | 1.427237                | 0.668162  | -1.072821 |
| 18               | 1                | 0              | 0.854469                | -0.168872 | -1.060099 |
| 19               | 7                | 0              | -4.583433               | -1.760425 | 0.093651  |
| 20               | 8                | 0              | -4.650287               | -2.603150 | -0.781506 |
| 21               | 8                | 0              | -5.366701               | -1.686773 | 1.021790  |
| 22               | 6                | 0              | 2.824780                | 0.486909  | -1.441922 |
| 23               | 1                | 0              | 3.284114                | 1.477613  | -1.465215 |
| 24               | 1                | 0              | 2.879346                | 0.067646  | -2.448558 |
| 25               | 6                | 0              | 3.559909                | -0.413448 | -0.471961 |
| 26               | 6                | 0              | 3.484081                | -0.183501 | 0.903676  |
| 27               | 6                | 0              | 4.333769                | -1.471886 | -0.943406 |
| 28               | 6                | 0              | 4.176050                | -0.998666 | 1.792423  |
| 29               | 1                | 0              | 2.879140                | 0.636238  | 1.279815  |
| 30               | 6                | 0              | 5.030202                | -2.288416 | -0.054398 |
| 31               | 1                | 0              | 4.388757                | -1.659877 | -2.011037 |
| 32               | 6                | 0              | 4.952024                | -2.053747 | 1.314431  |
| 33               | 1                | 0              | 4.111707                | -0.811435 | 2.858450  |
| 34               | 1                | 0              | 5.628416                | -3.110102 | -0.432054 |
| 35               | 1                | 0              | 5.490525                | -2.690296 | 2.007393  |

## Structure 14b (C<sub>2</sub>H<sub>5</sub>OH)

Energy (Hartrees): -953.094950804

No imaginary frequencies

Standard orientation:

| Center<br>Number | Atomic<br>Number | Atomic<br>Type | Coordinates (Angstroms) |           |           |
|------------------|------------------|----------------|-------------------------|-----------|-----------|
|                  |                  |                | X                       | Y         | Z         |
| 1                | 6                | 0              | -2.175159               | 0.942805  | 1.081809  |
| 2                | 6                | 0              | -3.211110               | 0.026549  | 1.144903  |
| 3                | 6                | 0              | -3.464775               | -0.763844 | 0.030592  |
| 4                | 6                | 0              | -2.725078               | -0.654476 | -1.140274 |
| 5                | 6                | 0              | -1.700811               | 0.276801  | -1.189266 |
| 6                | 6                | 0              | -1.401699               | 1.087031  | -0.081470 |
| 7                | 1                | 0              | -1.946393               | 1.541300  | 1.956278  |
| 8                | 1                | 0              | -3.798348               | -0.087069 | 2.046496  |
| 9                | 1                | 0              | -2.959633               | -1.270946 | -1.998192 |
| 10               | 1                | 0              | -1.147283               | 0.398278  | -2.113984 |
| 11               | 6                | 0              | -0.318477               | 2.084179  | -0.127767 |
| 12               | 6                | 0              | 0.946452                | 1.827709  | -0.623089 |
| 13               | 6                | 0              | -0.557129               | 3.399474  | 0.413406  |
| 14               | 1                | 0              | 1.665924                | 2.642907  | -0.593896 |
| 15               | 1                | 0              | -1.580375               | 3.567514  | 0.792451  |
| 16               | 8                | 0              | 0.253936                | 4.323576  | 0.467555  |
| 17               | 7                | 0              | 1.414754                | 0.688667  | -1.109618 |
| 18               | 1                | 0              | 0.819028                | -0.133034 | -1.117134 |
| 19               | 7                | 0              | -4.547847               | -1.743717 | 0.093110  |
| 20               | 8                | 0              | -4.725231               | -2.474079 | -0.864415 |
| 21               | 8                | 0              | -5.227994               | -1.788537 | 1.101308  |
| 22               | 6                | 0              | 2.811246                | 0.477312  | -1.473126 |
| 23               | 1                | 0              | 3.290625                | 1.458200  | -1.499197 |
| 24               | 1                | 0              | 2.857112                | 0.053448  | -2.477953 |
| 25               | 6                | 0              | 3.522042                | -0.434805 | -0.496143 |
| 26               | 6                | 0              | 3.499601                | -0.158219 | 0.873141  |
| 27               | 6                | 0              | 4.218120                | -1.551449 | -0.953696 |
| 28               | 6                | 0              | 4.166481                | -0.985941 | 1.768970  |
| 29               | 1                | 0              | 2.957498                | 0.709208  | 1.238985  |
| 30               | 6                | 0              | 4.889769                | -2.380975 | -0.057309 |
| 31               | 1                | 0              | 4.233797                | -1.774031 | -2.016041 |
| 32               | 6                | 0              | 4.863932                | -2.100494 | 1.304693  |
| 33               | 1                | 0              | 4.144167                | -0.762297 | 2.829815  |
| 34               | 1                | 0              | 5.426951                | -3.248787 | -0.423763 |
| 35               | 1                | 0              | 5.382460                | -2.746944 | 2.003857  |

## Structure 14c (vacuum)

Energy (Hartrees): -953.064696156

No imaginary frequencies

Standard orientation:

| Center<br>Number | Atomic<br>Number | Atomic<br>Type | Coordinates (Angstroms) |           |           |
|------------------|------------------|----------------|-------------------------|-----------|-----------|
|                  |                  |                | X                       | Y         | Z         |
| 1                | 6                | 0              | -1.995676               | 0.859596  | 1.066285  |
| 2                | 6                | 0              | -3.048922               | -0.039099 | 1.135611  |
| 3                | 6                | 0              | -3.398996               | -0.745642 | -0.005994 |
| 4                | 6                | 0              | -2.743766               | -0.571739 | -1.214657 |
| 5                | 6                | 0              | -1.692440               | 0.331596  | -1.268644 |
| 6                | 6                | 0              | -1.292875               | 1.047265  | -0.131310 |
| 7                | 1                | 0              | -1.717596               | 1.431466  | 1.941372  |
| 8                | 1                | 0              | -3.596735               | -0.200060 | 2.054197  |
| 9                | 1                | 0              | -3.065633               | -1.126599 | -2.085546 |
| 10               | 1                | 0              | -1.195811               | 0.511776  | -2.215885 |
| 11               | 6                | 0              | -0.159469               | 1.990287  | -0.195992 |
| 12               | 6                | 0              | 1.030576                | 1.695776  | -0.791479 |
| 13               | 6                | 0              | -0.242137               | 3.303280  | 0.443819  |
| 14               | 1                | 0              | 1.810815                | 2.455185  | -0.777665 |
| 15               | 7                | 0              | 1.391403                | 0.549671  | -1.407546 |
| 16               | 1                | 0              | 0.760976                | -0.237885 | -1.322119 |
| 17               | 8                | 0              | -1.177783               | 3.718648  | 1.086133  |
| 18               | 1                | 0              | 0.660236                | 3.933201  | 0.298669  |
| 19               | 7                | 0              | -4.513618               | -1.710203 | 0.063636  |
| 20               | 8                | 0              | -4.796953               | -2.313934 | -0.949298 |
| 21               | 8                | 0              | -5.076203               | -1.841916 | 1.128850  |
| 22               | 6                | 0              | 2.781317                | 0.237569  | -1.683436 |
| 23               | 1                | 0              | 2.825472                | -0.394530 | -2.573494 |
| 24               | 1                | 0              | 3.283457                | 1.174893  | -1.940899 |
| 25               | 6                | 0              | 3.517966                | -0.441235 | -0.541412 |
| 26               | 6                | 0              | 4.755614                | -1.032741 | -0.799711 |
| 27               | 6                | 0              | 3.005993                | -0.476324 | 0.752788  |
| 28               | 6                | 0              | 5.473611                | -1.643052 | 0.219851  |
| 29               | 1                | 0              | 5.157404                | -1.016499 | -1.808383 |
| 30               | 6                | 0              | 3.724487                | -1.092313 | 1.775424  |
| 31               | 1                | 0              | 2.043251                | -0.028141 | 0.972793  |
| 32               | 6                | 0              | 4.957549                | -1.674669 | 1.513075  |
| 33               | 1                | 0              | 6.432448                | -2.100356 | 0.006266  |
| 34               | 1                | 0              | 3.314629                | -1.116901 | 2.778092  |
| 35               | 1                | 0              | 5.513108                | -2.155553 | 2.309172  |



## Structure 14c (CHCl<sub>3</sub>)

Energy (Hartrees): -953.096035611

No imaginary frequencies

Standard orientation:

| Center<br>Number | Atomic<br>Number | Atomic<br>Type | Coordinates (Angstroms) |           |           |
|------------------|------------------|----------------|-------------------------|-----------|-----------|
|                  |                  |                | X                       | Y         | Z         |
| 1                | 6                | 0              | -2.088521               | 0.860188  | 1.058976  |
| 2                | 6                | 0              | -3.127889               | -0.052883 | 1.133650  |
| 3                | 6                | 0              | -3.434836               | -0.803425 | 0.006020  |
| 4                | 6                | 0              | -2.746495               | -0.661518 | -1.190267 |
| 5                | 6                | 0              | -1.711763               | 0.259698  | -1.248577 |
| 6                | 6                | 0              | -1.359923               | 1.026034  | -0.127775 |
| 7                | 1                | 0              | -1.834445               | 1.452644  | 1.928311  |
| 8                | 1                | 0              | -3.689407               | -0.188958 | 2.048181  |
| 9                | 1                | 0              | -3.024649               | -1.250438 | -2.054004 |
| 10               | 1                | 0              | -1.188254               | 0.406092  | -2.186939 |
| 11               | 6                | 0              | -0.253579               | 2.000311  | -0.195237 |
| 12               | 6                | 0              | 0.980363                | 1.715405  | -0.725555 |
| 13               | 6                | 0              | -0.410013               | 3.339030  | 0.336940  |
| 14               | 1                | 0              | 1.726248                | 2.508458  | -0.733379 |
| 15               | 7                | 0              | 1.406476                | 0.554587  | -1.232003 |
| 16               | 1                | 0              | 0.799766                | -0.254749 | -1.168448 |
| 17               | 8                | 0              | -1.407127               | 3.785547  | 0.877303  |
| 18               | 1                | 0              | 0.481958                | 3.983203  | 0.212004  |
| 19               | 7                | 0              | -4.529792               | -1.780147 | 0.080284  |
| 20               | 8                | 0              | -4.741262               | -2.475833 | -0.893390 |
| 21               | 8                | 0              | -5.166970               | -1.846334 | 1.112143  |
| 22               | 6                | 0              | 2.791133                | 0.306208  | -1.591589 |
| 23               | 1                | 0              | 2.814284                | -0.293927 | -2.503392 |
| 24               | 1                | 0              | 3.247309                | 1.269873  | -1.832066 |
| 25               | 6                | 0              | 3.596488                | -0.388348 | -0.508431 |
| 26               | 6                | 0              | 4.760767                | -1.070072 | -0.868467 |
| 27               | 6                | 0              | 3.226488                | -0.341302 | 0.834471  |
| 28               | 6                | 0              | 5.547348                | -1.686624 | 0.097590  |
| 29               | 1                | 0              | 5.049496                | -1.119387 | -1.913950 |
| 30               | 6                | 0              | 4.012803                | -0.962026 | 1.803173  |
| 31               | 1                | 0              | 2.320352                | 0.174732  | 1.133098  |
| 32               | 6                | 0              | 5.174228                | -1.634355 | 1.438906  |
| 33               | 1                | 0              | 6.447500                | -2.214451 | -0.196092 |
| 34               | 1                | 0              | 3.713057                | -0.920239 | 2.844126  |
| 35               | 1                | 0              | 5.783277                | -2.118890 | 2.193176  |

## Structure 14c (DMSO)

Energy (Hartrees): -953.096068258

No imaginary frequencies

Standard orientation:

| Center<br>Number | Atomic<br>Number | Atomic<br>Type | Coordinates (Angstroms) |           |           |
|------------------|------------------|----------------|-------------------------|-----------|-----------|
|                  |                  |                | X                       | Y         | Z         |
| 1                | 6                | 0              | -2.115888               | 0.867536  | 1.051612  |
| 2                | 6                | 0              | -3.123785               | -0.079590 | 1.124582  |
| 3                | 6                | 0              | -3.388771               | -0.854543 | 0.001797  |
| 4                | 6                | 0              | -2.684864               | -0.705853 | -1.184946 |
| 5                | 6                | 0              | -1.680682               | 0.248722  | -1.240567 |
| 6                | 6                | 0              | -1.374333               | 1.043561  | -0.126156 |
| 7                | 1                | 0              | -1.891190               | 1.475724  | 1.918543  |
| 8                | 1                | 0              | -3.688686               | -0.222946 | 2.036176  |
| 9                | 1                | 0              | -2.925973               | -1.314600 | -2.046295 |
| 10               | 1                | 0              | -1.144025               | 0.393381  | -2.172024 |
| 11               | 6                | 0              | -0.302049               | 2.054303  | -0.183998 |
| 12               | 6                | 0              | 0.956452                | 1.803295  | -0.684394 |
| 13               | 6                | 0              | -0.512787               | 3.389823  | 0.327170  |
| 14               | 1                | 0              | 1.676274                | 2.619980  | -0.681492 |
| 15               | 7                | 0              | 1.429166                | 0.655703  | -1.164612 |
| 16               | 1                | 0              | 0.841935                | -0.170759 | -1.138862 |
| 17               | 8                | 0              | -1.543884               | 3.821793  | 0.820571  |
| 18               | 1                | 0              | 0.367390                | 4.054070  | 0.230625  |
| 19               | 7                | 0              | -4.451565               | -1.863870 | 0.070949  |
| 20               | 8                | 0              | -4.640779               | -2.565181 | -0.904548 |
| 21               | 8                | 0              | -5.091485               | -1.952250 | 1.101357  |
| 22               | 6                | 0              | 2.821019                | 0.451074  | -1.529370 |
| 23               | 1                | 0              | 2.864356                | -0.070097 | -2.487619 |
| 24               | 1                | 0              | 3.271289                | 1.436567  | -1.671006 |
| 25               | 6                | 0              | 3.603457                | -0.330047 | -0.491954 |
| 26               | 6                | 0              | 4.643732                | -1.164401 | -0.902325 |
| 27               | 6                | 0              | 3.330380                | -0.205434 | 0.870670  |
| 28               | 6                | 0              | 5.407231                | -1.856177 | 0.033698  |
| 29               | 1                | 0              | 4.854203                | -1.274684 | -1.961753 |
| 30               | 6                | 0              | 4.091427                | -0.899155 | 1.807835  |
| 31               | 1                | 0              | 2.518651                | 0.432325  | 1.205216  |
| 32               | 6                | 0              | 5.132499                | -1.725164 | 1.392451  |
| 33               | 1                | 0              | 6.211741                | -2.502741 | -0.298571 |
| 34               | 1                | 0              | 3.869176                | -0.794864 | 2.864037  |
| 35               | 1                | 0              | 5.722618                | -2.266777 | 2.122984  |

## Structure 14c (C<sub>2</sub>H<sub>5</sub>OH)

Energy (Hartrees): -953.098525560

No imaginary frequencies

Standard orientation:

| Center<br>Number | Atomic<br>Number | Atomic<br>Type | Coordinates (Angstroms) |           |           |
|------------------|------------------|----------------|-------------------------|-----------|-----------|
|                  |                  |                | X                       | Y         | Z         |
| 1                | 6                | 0              | -2.087637               | 0.841414  | 1.074319  |
| 2                | 6                | 0              | -3.096269               | -0.105170 | 1.145997  |
| 3                | 6                | 0              | -3.389995               | -0.846676 | 0.007924  |
| 4                | 6                | 0              | -2.715607               | -0.667635 | -1.192123 |
| 5                | 6                | 0              | -1.709308               | 0.284072  | -1.244582 |
| 6                | 6                | 0              | -1.374713               | 1.046344  | -0.115941 |
| 7                | 1                | 0              | -1.838556               | 1.421594  | 1.954250  |
| 8                | 1                | 0              | -3.640149               | -0.271537 | 2.066485  |
| 9                | 1                | 0              | -2.977432               | -1.252405 | -2.064089 |
| 10               | 1                | 0              | -1.192010               | 0.451725  | -2.182952 |
| 11               | 6                | 0              | -0.297662               | 2.054065  | -0.175748 |
| 12               | 6                | 0              | 0.959045                | 1.797648  | -0.686451 |
| 13               | 6                | 0              | -0.497108               | 3.382072  | 0.333407  |
| 14               | 1                | 0              | 1.682252                | 2.611364  | -0.690334 |
| 15               | 7                | 0              | 1.419144                | 0.648810  | -1.167166 |
| 16               | 1                | 0              | 0.826196                | -0.173831 | -1.133681 |
| 17               | 8                | 0              | -1.531597               | 3.817878  | 0.835695  |
| 18               | 1                | 0              | 0.378497                | 4.048701  | 0.237574  |
| 19               | 7                | 0              | -4.449093               | -1.855654 | 0.075494  |
| 20               | 8                | 0              | -4.731982               | -2.464541 | -0.938978 |
| 21               | 8                | 0              | -5.001066               | -2.043542 | 1.143143  |
| 22               | 6                | 0              | 2.807506                | 0.433137  | -1.543695 |
| 23               | 1                | 0              | 2.835564                | -0.099780 | -2.495830 |
| 24               | 1                | 0              | 3.260289                | 1.414621  | -1.703700 |
| 25               | 6                | 0              | 3.595859                | -0.338988 | -0.504448 |
| 26               | 6                | 0              | 4.611359                | -1.202644 | -0.915905 |
| 27               | 6                | 0              | 3.354707                | -0.175902 | 0.860292  |
| 28               | 6                | 0              | 5.381437                | -1.886343 | 0.020816  |
| 29               | 1                | 0              | 4.798534                | -1.342384 | -1.976331 |
| 30               | 6                | 0              | 4.121732                | -0.862012 | 1.797909  |
| 31               | 1                | 0              | 2.564174                | 0.486531  | 1.197945  |
| 32               | 6                | 0              | 5.137741                | -1.718042 | 1.381253  |
| 33               | 1                | 0              | 6.166596                | -2.555763 | -0.312770 |
| 34               | 1                | 0              | 3.923653                | -0.727751 | 2.855630  |
| 35               | 1                | 0              | 5.732668                | -2.253583 | 2.112492  |

## Structure 14d (vacuum)

Energy (Hartrees): -953.057158684

No imaginary frequencies

Standard orientation:

| Center<br>Number | Atomic<br>Number | Atomic<br>Type | Coordinates (Angstroms) |           |           |
|------------------|------------------|----------------|-------------------------|-----------|-----------|
|                  |                  |                | X                       | Y         | Z         |
| 1                | 6                | 0              | -2.231216               | 0.802497  | 0.986425  |
| 2                | 6                | 0              | -3.474481               | 0.205671  | 1.117572  |
| 3                | 6                | 0              | -3.984548               | -0.520120 | 0.050745  |
| 4                | 6                | 0              | -3.296866               | -0.653990 | -1.144547 |
| 5                | 6                | 0              | -2.058081               | -0.042472 | -1.263948 |
| 6                | 6                | 0              | -1.494660               | 0.676756  | -0.200583 |
| 7                | 1                | 0              | -1.825528               | 1.372341  | 1.810423  |
| 8                | 1                | 0              | -4.047376               | 0.288617  | 2.031146  |
| 9                | 1                | 0              | -3.740369               | -1.209439 | -1.959780 |
| 10               | 1                | 0              | -1.532486               | -0.099978 | -2.210123 |
| 11               | 6                | 0              | -0.148602               | 1.273403  | -0.327712 |
| 12               | 6                | 0              | 0.822437                | 0.585968  | -1.003727 |
| 13               | 6                | 0              | 0.154597                | 2.558639  | 0.298594  |
| 14               | 1                | 0              | 0.595478                | -0.425818 | -1.335468 |
| 15               | 7                | 0              | 2.066213                | 0.985352  | -1.348352 |
| 16               | 1                | 0              | 2.377856                | 1.902843  | -1.065807 |
| 17               | 1                | 0              | 1.211429                | 2.888325  | 0.224839  |
| 18               | 8                | 0              | -0.630896               | 3.260556  | 0.892662  |
| 19               | 7                | 0              | -5.304639               | -1.161571 | 0.186944  |
| 20               | 8                | 0              | -5.717449               | -1.804212 | -0.755679 |
| 21               | 8                | 0              | -5.897629               | -1.010913 | 1.233717  |
| 22               | 6                | 0              | 3.110615                | 0.039812  | -1.699568 |
| 23               | 1                | 0              | 3.745916                | 0.488222  | -2.466867 |
| 24               | 1                | 0              | 2.623575                | -0.825993 | -2.158577 |
| 25               | 6                | 0              | 3.966574                | -0.409851 | -0.529744 |
| 26               | 6                | 0              | 5.276222                | -0.827302 | -0.763749 |
| 27               | 6                | 0              | 3.463751                | -0.446206 | 0.769696  |
| 28               | 6                | 0              | 6.069493                | -1.285449 | 0.281458  |
| 29               | 1                | 0              | 5.678918                | -0.790994 | -1.771248 |
| 30               | 6                | 0              | 4.259191                | -0.900722 | 1.817497  |
| 31               | 1                | 0              | 2.449627                | -0.119040 | 0.972498  |
| 32               | 6                | 0              | 5.561417                | -1.322717 | 1.576438  |
| 33               | 1                | 0              | 7.086231                | -1.605304 | 0.086544  |
| 34               | 1                | 0              | 3.858610                | -0.923549 | 2.823928  |
| 35               | 1                | 0              | 6.179832                | -1.673666 | 2.393682  |

## Structure 14d (CHCl<sub>3</sub>)

Energy (Hartrees): -953.090070200

No imaginary frequencies

Standard orientation:

| Center<br>Number | Atomic<br>Number | Atomic<br>Type | Coordinates (Angstroms) |           |           |
|------------------|------------------|----------------|-------------------------|-----------|-----------|
|                  |                  |                | X                       | Y         | Z         |
| 1                | 6                | 0              | -2.370074               | 1.010634  | 0.821468  |
| 2                | 6                | 0              | -3.628999               | 0.469771  | 1.020168  |
| 3                | 6                | 0              | -4.095927               | -0.487288 | 0.127399  |
| 4                | 6                | 0              | -3.342309               | -0.907471 | -0.959702 |
| 5                | 6                | 0              | -2.088168               | -0.350469 | -1.148831 |
| 6                | 6                | 0              | -1.568003               | 0.603861  | -0.258568 |
| 7                | 1                | 0              | -1.997991               | 1.750197  | 1.516881  |
| 8                | 1                | 0              | -4.240430               | 0.775388  | 1.858825  |
| 9                | 1                | 0              | -3.739768               | -1.639486 | -1.650085 |
| 10               | 1                | 0              | -1.512712               | -0.644368 | -2.019080 |
| 11               | 6                | 0              | -0.210903               | 1.148933  | -0.450566 |
| 12               | 6                | 0              | 0.778222                | 0.312878  | -0.931047 |
| 13               | 6                | 0              | 0.095080                | 2.524806  | -0.112948 |
| 14               | 1                | 0              | 0.545316                | -0.744498 | -1.041688 |
| 15               | 7                | 0              | 2.026905                | 0.614122  | -1.293949 |
| 16               | 1                | 0              | 2.347414                | 1.572618  | -1.247779 |
| 17               | 1                | 0              | 1.157092                | 2.817262  | -0.211819 |
| 18               | 8                | 0              | -0.701540               | 3.363885  | 0.272946  |
| 19               | 7                | 0              | -5.426734               | -1.064518 | 0.333871  |
| 20               | 8                | 0              | -5.820490               | -1.896633 | -0.460968 |
| 21               | 8                | 0              | -6.073311               | -0.686730 | 1.291469  |
| 22               | 6                | 0              | 3.044785                | -0.388382 | -1.567790 |
| 23               | 1                | 0              | 3.563671                | -0.123147 | -2.491275 |
| 24               | 1                | 0              | 2.529716                | -1.336688 | -1.741792 |
| 25               | 6                | 0              | 4.051552                | -0.536805 | -0.444573 |
| 26               | 6                | 0              | 5.400773                | -0.718851 | -0.743834 |
| 27               | 6                | 0              | 3.646459                | -0.519387 | 0.890938  |
| 28               | 6                | 0              | 6.334245                | -0.889504 | 0.275028  |
| 29               | 1                | 0              | 5.724350                | -0.723759 | -1.780053 |
| 30               | 6                | 0              | 4.578508                | -0.687248 | 1.910156  |
| 31               | 1                | 0              | 2.600114                | -0.368221 | 1.137596  |
| 32               | 6                | 0              | 5.924595                | -0.873344 | 1.604372  |
| 33               | 1                | 0              | 7.381151                | -1.027884 | 0.029878  |
| 34               | 1                | 0              | 4.253708                | -0.671125 | 2.944407  |
| 35               | 1                | 0              | 6.650869                | -1.000517 | 2.398924  |

## Structure 14d (DMSO)

Energy (Hartrees): -953.090381718

No imaginary frequencies

Standard orientation:

| Center<br>Number | Atomic<br>Number | Atomic<br>Type | Coordinates (Angstroms) |           |           |
|------------------|------------------|----------------|-------------------------|-----------|-----------|
|                  |                  |                | X                       | Y         | Z         |
| 1                | 6                | 0              | -2.403507               | -1.072991 | -0.760590 |
| 2                | 6                | 0              | -3.671511               | -0.559858 | -0.972910 |
| 3                | 6                | 0              | -4.129904               | 0.460385  | -0.146746 |
| 4                | 6                | 0              | -3.356166               | 0.969577  | 0.887616  |
| 5                | 6                | 0              | -2.094261               | 0.437913  | 1.093468  |
| 6                | 6                | 0              | -1.581873               | -0.579125 | 0.268823  |
| 7                | 1                | 0              | -2.037528               | -1.856160 | -1.410052 |
| 8                | 1                | 0              | -4.293984               | -0.934014 | -1.775003 |
| 9                | 1                | 0              | -3.741396               | 1.751229  | 1.528698  |
| 10               | 1                | 0              | -1.504487               | 0.806296  | 1.924761  |
| 11               | 6                | 0              | -0.218357               | -1.095615 | 0.476472  |
| 12               | 6                | 0              | 0.765315                | -0.210527 | 0.890873  |
| 13               | 6                | 0              | 0.102568                | -2.484293 | 0.228344  |
| 14               | 1                | 0              | 0.519330                | 0.849018  | 0.919980  |
| 15               | 7                | 0              | 2.012173                | -0.468973 | 1.271563  |
| 16               | 1                | 0              | 2.340868                | -1.425715 | 1.323057  |
| 17               | 1                | 0              | 1.172342                | -2.748399 | 0.311593  |
| 18               | 8                | 0              | -0.689929               | -3.366008 | -0.069788 |
| 19               | 7                | 0              | -5.467110               | 1.009848  | -0.370488 |
| 20               | 8                | 0              | -5.832697               | 1.936053  | 0.329904  |
| 21               | 8                | 0              | -6.151911               | 0.517738  | -1.248363 |
| 22               | 6                | 0              | 3.014188                | 0.563367  | 1.497817  |
| 23               | 1                | 0              | 3.490893                | 0.388889  | 2.464270  |
| 24               | 1                | 0              | 2.490795                | 1.520984  | 1.549544  |
| 25               | 6                | 0              | 4.067208                | 0.596602  | 0.410343  |
| 26               | 6                | 0              | 5.418524                | 0.651326  | 0.746477  |
| 27               | 6                | 0              | 3.699917                | 0.590050  | -0.937094 |
| 28               | 6                | 0              | 6.393133                | 0.704240  | -0.248003 |
| 29               | 1                | 0              | 5.709844                | 0.648995  | 1.792273  |
| 30               | 6                | 0              | 4.671361                | 0.640008  | -1.931000 |
| 31               | 1                | 0              | 2.649895                | 0.542757  | -1.210403 |
| 32               | 6                | 0              | 6.021508                | 0.698020  | -1.588526 |
| 33               | 1                | 0              | 7.441535                | 0.743688  | 0.026096  |
| 34               | 1                | 0              | 4.375756                | 0.634056  | -2.974331 |
| 35               | 1                | 0              | 6.778130                | 0.735509  | -2.364202 |

## Structure 14d (C<sub>2</sub>H<sub>5</sub>OH)

Energy (Hartrees): -953.092522899

No imaginary frequencies

Standard orientation:

| Center<br>Number | Atomic<br>Number | Atomic<br>Type | Coordinates (Angstroms) |           |           |
|------------------|------------------|----------------|-------------------------|-----------|-----------|
|                  |                  |                | X                       | Y         | Z         |
| 1                | 6                | 0              | -2.376400               | 0.886287  | 0.967601  |
| 2                | 6                | 0              | -3.631435               | 0.314118  | 1.077938  |
| 3                | 6                | 0              | -4.081735               | -0.511372 | 0.053657  |
| 4                | 6                | 0              | -3.313260               | -0.771974 | -1.073690 |
| 5                | 6                | 0              | -2.064362               | -0.182515 | -1.172732 |
| 6                | 6                | 0              | -1.563843               | 0.647765  | -0.155096 |
| 7                | 1                | 0              | -2.013286               | 1.511724  | 1.771733  |
| 8                | 1                | 0              | -4.247247               | 0.493793  | 1.949472  |
| 9                | 1                | 0              | -3.692619               | -1.406367 | -1.863864 |
| 10               | 1                | 0              | -1.478667               | -0.354914 | -2.068453 |
| 11               | 6                | 0              | -0.218972               | 1.242689  | -0.256384 |
| 12               | 6                | 0              | 0.795723                | 0.495489  | -0.840095 |
| 13               | 6                | 0              | 0.045415                | 2.568482  | 0.234913  |
| 14               | 1                | 0              | 0.572006                | -0.531554 | -1.120692 |
| 15               | 7                | 0              | 2.043325                | 0.853300  | -1.112664 |
| 16               | 1                | 0              | 2.366190                | 1.788848  | -0.896259 |
| 17               | 1                | 0              | 1.093240                | 2.907043  | 0.172893  |
| 18               | 8                | 0              | -0.783495               | 3.346475  | 0.702314  |
| 19               | 7                | 0              | -5.402732               | -1.120400 | 0.164440  |
| 20               | 8                | 0              | -5.767416               | -1.881481 | -0.714054 |
| 21               | 8                | 0              | -6.088200               | -0.844738 | 1.132566  |
| 22               | 6                | 0              | 3.058252                | -0.076950 | -1.592176 |
| 23               | 1                | 0              | 3.576874                | 0.379046  | -2.437220 |
| 24               | 1                | 0              | 2.537754                | -0.965673 | -1.956696 |
| 25               | 6                | 0              | 4.057593                | -0.454725 | -0.519797 |
| 26               | 6                | 0              | 5.424871                | -0.356445 | -0.769240 |
| 27               | 6                | 0              | 3.622785                | -0.926165 | 0.721295  |
| 28               | 6                | 0              | 6.349500                | -0.730355 | 0.204107  |
| 29               | 1                | 0              | 5.768780                | 0.015123  | -1.729578 |
| 30               | 6                | 0              | 4.543743                | -1.297275 | 1.694361  |
| 31               | 1                | 0              | 2.559205                | -1.002385 | 0.928387  |
| 32               | 6                | 0              | 5.910729                | -1.200992 | 1.437300  |
| 33               | 1                | 0              | 7.411102                | -0.649015 | -0.001466 |
| 34               | 1                | 0              | 4.195832                | -1.663506 | 2.653960  |
| 35               | 1                | 0              | 6.627952                | -1.490894 | 2.196972  |

## Structure 14e (vacuum)

Energy (Hartrees): -953.054860620

No imaginary frequencies

Standard orientation:

| Center<br>Number | Atomic<br>Number | Atomic<br>Type | Coordinates (Angstroms) |           |           |
|------------------|------------------|----------------|-------------------------|-----------|-----------|
|                  |                  |                | X                       | Y         | Z         |
| 1                | 6                | 0              | -4.049647               | 0.900026  | -0.105492 |
| 2                | 6                | 0              | -2.741537               | 1.353601  | -0.138994 |
| 3                | 6                | 0              | -1.665768               | 0.453881  | -0.087249 |
| 4                | 6                | 0              | -1.947755               | -0.914491 | 0.031558  |
| 5                | 6                | 0              | -3.251927               | -1.385509 | 0.057130  |
| 6                | 6                | 0              | -4.284311               | -0.465106 | -0.014694 |
| 7                | 1                | 0              | -4.885879               | 1.584243  | -0.153419 |
| 8                | 1                | 0              | -2.549451               | 2.415087  | -0.204645 |
| 9                | 1                | 0              | -1.132752               | -1.621233 | 0.135490  |
| 10               | 1                | 0              | -3.475697               | -2.439492 | 0.149911  |
| 11               | 6                | 0              | -0.264336               | 0.921967  | -0.177023 |
| 12               | 6                | 0              | 0.618786                | 0.166044  | -0.903610 |
| 13               | 1                | 0              | 0.202242                | -0.633388 | -1.512277 |
| 14               | 6                | 0              | 0.108957                | 2.215989  | 0.398837  |
| 15               | 1                | 0              | 1.106255                | 2.593833  | 0.115267  |
| 16               | 1                | 0              | 2.399730                | -0.388834 | -1.653954 |
| 17               | 7                | 0              | 1.964087                | 0.232780  | -0.989915 |
| 18               | 8                | 0              | -0.606454               | 2.902106  | 1.094838  |
| 19               | 7                | 0              | -5.674838               | -0.952505 | 0.018901  |
| 20               | 8                | 0              | -6.561711               | -0.128180 | -0.043922 |
| 21               | 8                | 0              | -5.849183               | -2.150277 | 0.103758  |
| 22               | 6                | 0              | 2.884069                | 0.884797  | -0.062944 |
| 23               | 1                | 0              | 2.384043                | 0.943648  | 0.909800  |
| 24               | 1                | 0              | 3.114290                | 1.905032  | -0.382536 |
| 25               | 6                | 0              | 4.158114                | 0.082971  | 0.047869  |
| 26               | 6                | 0              | 4.127375                | -1.191018 | 0.617991  |
| 27               | 6                | 0              | 5.366026                | 0.589249  | -0.423949 |
| 28               | 6                | 0              | 5.288760                | -1.945748 | 0.716550  |
| 29               | 1                | 0              | 3.187224                | -1.585400 | 0.991721  |
| 30               | 6                | 0              | 6.532229                | -0.165818 | -0.325982 |
| 31               | 1                | 0              | 5.397056                | 1.579588  | -0.866108 |
| 32               | 6                | 0              | 6.494433                | -1.432608 | 0.243116  |
| 33               | 1                | 0              | 5.256589                | -2.930648 | 1.166829  |
| 34               | 1                | 0              | 7.467955                | 0.236925  | -0.695036 |
| 35               | 1                | 0              | 7.401645                | -2.019844 | 0.319982  |



## Structure 14e (CHCl<sub>3</sub>)

Energy (Hartrees): -953.086801615

No imaginary frequencies

Standard orientation:

| Center<br>Number | Atomic<br>Number | Atomic<br>Type | Coordinates (Angstroms) |           |           |
|------------------|------------------|----------------|-------------------------|-----------|-----------|
|                  |                  |                | X                       | Y         | Z         |
| 1                | 6                | 0              | -4.058971               | 0.912836  | -0.138467 |
| 2                | 6                | 0              | -2.742777               | 1.339345  | -0.160595 |
| 3                | 6                | 0              | -1.681074               | 0.423240  | -0.065898 |
| 4                | 6                | 0              | -1.991054               | -0.938837 | 0.076245  |
| 5                | 6                | 0              | -3.303611               | -1.384573 | 0.089303  |
| 6                | 6                | 0              | -4.320350               | -0.447159 | -0.019046 |
| 7                | 1                | 0              | -4.875014               | 1.618136  | -0.223238 |
| 8                | 1                | 0              | -2.533344               | 2.394939  | -0.263736 |
| 9                | 1                | 0              | -1.192781               | -1.661250 | 0.201764  |
| 10               | 1                | 0              | -3.537663               | -2.434961 | 0.200006  |
| 11               | 6                | 0              | -0.273870               | 0.871114  | -0.144897 |
| 12               | 6                | 0              | 0.611892                | 0.069984  | -0.839431 |
| 13               | 1                | 0              | 0.186395                | -0.741441 | -1.424876 |
| 14               | 6                | 0              | 0.107370                | 2.162894  | 0.401291  |
| 15               | 1                | 0              | 1.105101                | 2.530972  | 0.117912  |
| 16               | 1                | 0              | 2.361687                | -0.554442 | -1.568641 |
| 17               | 7                | 0              | 1.945345                | 0.101601  | -0.921327 |
| 18               | 8                | 0              | -0.603935               | 2.873038  | 1.093690  |
| 19               | 7                | 0              | -5.712803               | -0.904820 | 0.001613  |
| 20               | 8                | 0              | -6.591699               | -0.065599 | -0.025249 |
| 21               | 8                | 0              | -5.921999               | -2.102124 | 0.042045  |
| 22               | 6                | 0              | 2.890044                | 0.848464  | -0.094632 |
| 23               | 1                | 0              | 2.438455                | 0.975228  | 0.894675  |
| 24               | 1                | 0              | 3.077124                | 1.840885  | -0.512943 |
| 25               | 6                | 0              | 4.187985                | 0.086049  | 0.019292  |
| 26               | 6                | 0              | 4.210582                | -1.155857 | 0.658265  |
| 27               | 6                | 0              | 5.368121                | 0.603456  | -0.509889 |
| 28               | 6                | 0              | 5.398773                | -1.868040 | 0.767998  |
| 29               | 1                | 0              | 3.292374                | -1.559658 | 1.074815  |
| 30               | 6                | 0              | 6.560970                | -0.108267 | -0.398660 |
| 31               | 1                | 0              | 5.354369                | 1.567188  | -1.008563 |
| 32               | 6                | 0              | 6.577158                | -1.343593 | 0.239142  |
| 33               | 1                | 0              | 5.409213                | -2.828271 | 1.270832  |
| 34               | 1                | 0              | 7.475121                | 0.303276  | -0.811105 |
| 35               | 1                | 0              | 7.505109                | -1.896931 | 0.327074  |

## Structure 14e (DMSO)

Energy (Hartrees): -953.086782424

No imaginary frequencies

Standard orientation:

| Center<br>Number | Atomic<br>Number | Atomic<br>Type | Coordinates (Angstroms) |           |           |
|------------------|------------------|----------------|-------------------------|-----------|-----------|
|                  |                  |                | X                       | Y         | Z         |
| 1                | 6                | 0              | -4.054643               | 0.914452  | -0.104247 |
| 2                | 6                | 0              | -2.741242               | 1.347810  | -0.140714 |
| 3                | 6                | 0              | -1.671510               | 0.435907  | -0.087249 |
| 4                | 6                | 0              | -1.973957               | -0.931960 | 0.023663  |
| 5                | 6                | 0              | -3.283719               | -1.384031 | 0.051229  |
| 6                | 6                | 0              | -4.308328               | -0.449980 | -0.011487 |
| 7                | 1                | 0              | -4.873109               | 1.620093  | -0.159527 |
| 8                | 1                | 0              | -2.540440               | 2.406633  | -0.226647 |
| 9                | 1                | 0              | -1.170990               | -1.654789 | 0.110809  |
| 10               | 1                | 0              | -3.505650               | -2.439444 | 0.137831  |
| 11               | 6                | 0              | -0.269732               | 0.891478  | -0.174112 |
| 12               | 6                | 0              | 0.616109                | 0.092292  | -0.879545 |
| 13               | 1                | 0              | 0.191195                | -0.712196 | -1.474897 |
| 14               | 6                | 0              | 0.114084                | 2.178303  | 0.375917  |
| 15               | 1                | 0              | 1.103588                | 2.553373  | 0.074397  |
| 16               | 1                | 0              | 2.359190                | -0.529404 | -1.611974 |
| 17               | 7                | 0              | 1.944922                | 0.122525  | -0.957401 |
| 18               | 8                | 0              | -0.585105               | 2.880385  | 1.092695  |
| 19               | 7                | 0              | -5.695916               | -0.914392 | 0.028327  |
| 20               | 8                | 0              | -6.581829               | -0.079906 | 0.014860  |
| 21               | 8                | 0              | -5.900066               | -2.113560 | 0.071431  |
| 22               | 6                | 0              | 2.889013                | 0.864789  | -0.126438 |
| 23               | 1                | 0              | 2.427391                | 1.004683  | 0.856281  |
| 24               | 1                | 0              | 3.093659                | 1.850401  | -0.551639 |
| 25               | 6                | 0              | 4.174303                | 0.085325  | 0.012988  |
| 26               | 6                | 0              | 4.159258                | -1.179447 | 0.606049  |
| 27               | 6                | 0              | 5.380760                | 0.610909  | -0.443977 |
| 28               | 6                | 0              | 5.336020                | -1.906833 | 0.741263  |
| 29               | 1                | 0              | 3.220178                | -1.590305 | 0.965381  |
| 30               | 6                | 0              | 6.562295                | -0.115823 | -0.306520 |
| 31               | 1                | 0              | 5.395567                | 1.591968  | -0.907775 |
| 32               | 6                | 0              | 6.541316                | -1.374502 | 0.284720  |
| 33               | 1                | 0              | 5.315530                | -2.886345 | 1.205510  |
| 34               | 1                | 0              | 7.496555                | 0.301096  | -0.665679 |
| 35               | 1                | 0              | 7.460125                | -1.940193 | 0.390325  |

## Structure 14e (C<sub>2</sub>H<sub>5</sub>OH)

Energy (Hartrees): -953.088676304

No imaginary frequencies

Standard orientation:

| Center<br>Number | Atomic<br>Number | Atomic<br>Type | Coordinates (Angstroms) |           |           |
|------------------|------------------|----------------|-------------------------|-----------|-----------|
|                  |                  |                | X                       | Y         | Z         |
| 1                | 6                | 0              | -4.040118               | 0.903807  | -0.433831 |
| 2                | 6                | 0              | -2.705800               | 1.259609  | -0.350080 |
| 3                | 6                | 0              | -1.732816               | 0.334773  | 0.063083  |
| 4                | 6                | 0              | -2.147142               | -0.959288 | 0.412244  |
| 5                | 6                | 0              | -3.479007               | -1.335361 | 0.333136  |
| 6                | 6                | 0              | -4.406119               | -0.393424 | -0.090819 |
| 7                | 1                | 0              | -4.784471               | 1.613169  | -0.770966 |
| 8                | 1                | 0              | -2.410547               | 2.261904  | -0.632152 |
| 9                | 1                | 0              | -1.419028               | -1.679736 | 0.767959  |
| 10               | 1                | 0              | -3.793101               | -2.334048 | 0.606811  |
| 11               | 6                | 0              | -0.298849               | 0.706824  | 0.097947  |
| 12               | 6                | 0              | 0.593576                | -0.218492 | -0.423570 |
| 13               | 1                | 0              | 0.151231                | -1.096280 | -0.887975 |
| 14               | 6                | 0              | 0.074766                | 1.995420  | 0.628019  |
| 15               | 1                | 0              | 1.127277                | 2.287874  | 0.541301  |
| 16               | 1                | 0              | 2.316548                | -1.045144 | -0.970460 |
| 17               | 7                | 0              | 1.921111                | -0.253343 | -0.478998 |
| 18               | 8                | 0              | -0.705525               | 2.787138  | 1.156231  |
| 19               | 7                | 0              | -5.813156               | -0.776787 | -0.181781 |
| 20               | 8                | 0              | -6.612381               | 0.048050  | -0.585077 |
| 21               | 8                | 0              | -6.129328               | -1.905827 | 0.146202  |
| 22               | 6                | 0              | 2.884592                | 0.677000  | 0.104849  |
| 23               | 1                | 0              | 2.601978                | 0.856799  | 1.147580  |
| 24               | 1                | 0              | 2.859081                | 1.629415  | -0.430740 |
| 25               | 6                | 0              | 4.270488                | 0.088054  | 0.028617  |
| 26               | 6                | 0              | 4.616452                | -1.001026 | 0.832052  |
| 27               | 6                | 0              | 5.209859                | 0.606880  | -0.860754 |
| 28               | 6                | 0              | 5.885498                | -1.563071 | 0.744570  |
| 29               | 1                | 0              | 3.889022                | -1.406029 | 1.529578  |
| 30               | 6                | 0              | 6.482656                | 0.047131  | -0.947060 |
| 31               | 1                | 0              | 4.943873                | 1.453294  | -1.486063 |
| 32               | 6                | 0              | 6.821141                | -1.038867 | -0.146033 |
| 33               | 1                | 0              | 6.147101                | -2.407543 | 1.372414  |
| 34               | 1                | 0              | 7.207107                | 0.458675  | -1.641065 |
| 35               | 1                | 0              | 7.811055                | -1.476145 | -0.213824 |

## Structure 14f (vacuum)

Energy (Hartrees): -953.057282363

No imaginary frequencies

Standard orientation:

| Center<br>Number | Atomic<br>Number | Atomic<br>Type | Coordinates (Angstroms) |           |           |
|------------------|------------------|----------------|-------------------------|-----------|-----------|
|                  |                  |                | X                       | Y         | Z         |
| 1                | 6                | 0              | 4.107051                | 0.964597  | -0.000856 |
| 2                | 6                | 0              | 2.785073                | 1.376892  | 0.031227  |
| 3                | 6                | 0              | 1.730926                | 0.447788  | 0.036703  |
| 4                | 6                | 0              | 2.054898                | -0.918046 | 0.007428  |
| 5                | 6                | 0              | 3.372229                | -1.348200 | -0.001660 |
| 6                | 6                | 0              | 4.379812                | -0.395808 | -0.010931 |
| 7                | 1                | 0              | 4.923376                | 1.674120  | 0.002192  |
| 8                | 1                | 0              | 2.568100                | 2.436757  | 0.087076  |
| 9                | 1                | 0              | 1.259316                | -1.652245 | -0.040384 |
| 10               | 1                | 0              | 3.628269                | -2.398792 | -0.024508 |
| 11               | 6                | 0              | 0.326505                | 0.895444  | 0.080410  |
| 12               | 6                | 0              | -0.557174               | 0.188047  | 0.863456  |
| 13               | 1                | 0              | -0.139006               | -0.533180 | 1.563064  |
| 14               | 6                | 0              | -0.006636               | 2.156698  | -0.580251 |
| 15               | 1                | 0              | 0.742446                | 2.496362  | -1.320599 |
| 16               | 1                | 0              | -2.351591               | -0.314285 | 1.603338  |
| 17               | 7                | 0              | -1.894709               | 0.233012  | 0.888946  |
| 18               | 8                | 0              | -0.977845               | 2.848834  | -0.349528 |
| 19               | 7                | 0              | 5.783099                | -0.842986 | -0.035475 |
| 20               | 8                | 0              | 6.644543                | 0.010224  | -0.053833 |
| 21               | 8                | 0              | 5.992159                | -2.037863 | -0.034881 |
| 22               | 6                | 0              | -2.775352               | 0.755583  | -0.154014 |
| 23               | 1                | 0              | -2.256621               | 0.627832  | -1.109488 |
| 24               | 1                | 0              | -2.938838               | 1.824948  | -0.020080 |
| 25               | 6                | 0              | -4.075038               | -0.010217 | -0.143158 |
| 26               | 6                | 0              | -4.102846               | -1.355266 | -0.518507 |
| 27               | 6                | 0              | -5.257722               | 0.606814  | 0.256957  |
| 28               | 6                | 0              | -5.293448               | -2.070199 | -0.494096 |
| 29               | 1                | 0              | -3.184338               | -1.838127 | -0.838351 |
| 30               | 6                | 0              | -6.453299               | -0.106826 | 0.280795  |
| 31               | 1                | 0              | -5.241942               | 1.652016  | 0.546678  |
| 32               | 6                | 0              | -6.472133               | -1.445088 | -0.093253 |
| 33               | 1                | 0              | -5.305764               | -3.111525 | -0.793208 |
| 34               | 1                | 0              | -7.368063               | 0.383913  | 0.590974  |
| 35               | 1                | 0              | -7.402002               | -2.000825 | -0.076564 |

## Structure 14f (CHCl<sub>3</sub>)

Energy (Hartrees): -953.086794711

No imaginary frequencies

Standard orientation:

| Center<br>Number | Atomic<br>Number | Atomic<br>Type | Coordinates (Angstroms) |           |           |
|------------------|------------------|----------------|-------------------------|-----------|-----------|
|                  |                  |                | X                       | Y         | Z         |
| 1                | 6                | 0              | 4.096493                | 0.952459  | -0.108992 |
| 2                | 6                | 0              | 2.779271                | 1.375815  | -0.073469 |
| 3                | 6                | 0              | 1.718077                | 0.458376  | 0.041627  |
| 4                | 6                | 0              | 2.036019                | -0.909574 | 0.121640  |
| 5                | 6                | 0              | 3.348915                | -1.348570 | 0.107789  |
| 6                | 6                | 0              | 4.363408                | -0.407716 | -0.013346 |
| 7                | 1                | 0              | 4.909371                | 1.662122  | -0.188565 |
| 8                | 1                | 0              | 2.575612                | 2.439463  | -0.100411 |
| 9                | 1                | 0              | 1.239488                | -1.643056 | 0.170153  |
| 10               | 1                | 0              | 3.586966                | -2.402263 | 0.168126  |
| 11               | 6                | 0              | 0.320371                | 0.918929  | 0.089383  |
| 12               | 6                | 0              | -0.568624               | 0.230757  | 0.898505  |
| 13               | 1                | 0              | -0.157322               | -0.466568 | 1.625277  |
| 14               | 6                | 0              | -0.008214               | 2.166586  | -0.582085 |
| 15               | 1                | 0              | 0.717889                | 2.484347  | -1.351890 |
| 16               | 1                | 0              | -2.352542               | -0.251380 | 1.650009  |
| 17               | 7                | 0              | -1.898109               | 0.274980  | 0.914911  |
| 18               | 8                | 0              | -0.964711               | 2.884909  | -0.334580 |
| 19               | 7                | 0              | 5.755157                | -0.862696 | -0.037062 |
| 20               | 8                | 0              | 6.631756                | -0.021871 | -0.090471 |
| 21               | 8                | 0              | 5.967564                | -2.059642 | -0.000546 |
| 22               | 6                | 0              | -2.780540               | 0.792727  | -0.129532 |
| 23               | 1                | 0              | -2.255419               | 0.689405  | -1.083413 |
| 24               | 1                | 0              | -2.974876               | 1.854738  | 0.023374  |
| 25               | 6                | 0              | -4.063540               | -0.000960 | -0.143352 |
| 26               | 6                | 0              | -4.073822               | -1.309063 | -0.632604 |
| 27               | 6                | 0              | -5.244085               | 0.550370  | 0.351135  |
| 28               | 6                | 0              | -5.248401               | -2.052547 | -0.631979 |
| 29               | 1                | 0              | -3.155971               | -1.739563 | -1.022376 |
| 30               | 6                | 0              | -6.422763               | -0.192912 | 0.353252  |
| 31               | 1                | 0              | -5.240846               | 1.567682  | 0.728959  |
| 32               | 6                | 0              | -6.425914               | -1.494245 | -0.137372 |
| 33               | 1                | 0              | -5.248513               | -3.064522 | -1.020477 |
| 34               | 1                | 0              | -7.336840               | 0.245889  | 0.736905  |
| 35               | 1                | 0              | -7.343115               | -2.072046 | -0.139454 |

## Structure 14f (DMSO)

Energy (Hartrees): -953.085631886

No imaginary frequencies

Standard orientation:

| Center<br>Number | Atomic<br>Number | Atomic<br>Type | Coordinates (Angstroms) |           |           |
|------------------|------------------|----------------|-------------------------|-----------|-----------|
|                  |                  |                | X                       | Y         | Z         |
| 1                | 6                | 0              | 4.076308                | 0.952217  | -0.159319 |
| 2                | 6                | 0              | 2.766318                | 1.390521  | -0.077729 |
| 3                | 6                | 0              | 1.698405                | 0.486088  | 0.082145  |
| 4                | 6                | 0              | 2.005849                | -0.885503 | 0.163734  |
| 5                | 6                | 0              | 3.312815                | -1.337783 | 0.112186  |
| 6                | 6                | 0              | 4.333721                | -0.409984 | -0.055941 |
| 7                | 1                | 0              | 4.889360                | 1.656720  | -0.275278 |
| 8                | 1                | 0              | 2.577404                | 2.456625  | -0.105359 |
| 9                | 1                | 0              | 1.205969                | -1.612268 | 0.245217  |
| 10               | 1                | 0              | 3.537141                | -2.394384 | 0.176319  |
| 11               | 6                | 0              | 0.308312                | 0.957627  | 0.172874  |
| 12               | 6                | 0              | -0.568704               | 0.256931  | 0.990204  |
| 13               | 1                | 0              | -0.151428               | -0.443339 | 1.710424  |
| 14               | 6                | 0              | -0.029901               | 2.221244  | -0.460200 |
| 15               | 1                | 0              | 0.679308                | 2.555243  | -1.238530 |
| 16               | 1                | 0              | -2.344574               | -0.233429 | 1.749113  |
| 17               | 7                | 0              | -1.894900               | 0.300381  | 1.014759  |
| 18               | 8                | 0              | -0.977765               | 2.939407  | -0.175184 |
| 19               | 7                | 0              | 5.716093                | -0.880452 | -0.125436 |
| 20               | 8                | 0              | 6.590809                | -0.064829 | -0.352751 |
| 21               | 8                | 0              | 5.929466                | -2.066529 | 0.048151  |
| 22               | 6                | 0              | -2.775168               | 0.819673  | -0.025995 |
| 23               | 1                | 0              | -2.225445               | 0.767915  | -0.970883 |
| 24               | 1                | 0              | -3.014524               | 1.868327  | 0.154409  |
| 25               | 6                | 0              | -4.031050               | -0.014274 | -0.105574 |
| 26               | 6                | 0              | -3.948231               | -1.391652 | -0.325613 |
| 27               | 6                | 0              | -5.284869               | 0.579984  | 0.022831  |
| 28               | 6                | 0              | -5.102453               | -2.161220 | -0.416907 |
| 29               | 1                | 0              | -2.973492               | -1.859487 | -0.429987 |
| 30               | 6                | 0              | -6.443444               | -0.189067 | -0.072282 |
| 31               | 1                | 0              | -5.354076               | 1.648761  | 0.198081  |
| 32               | 6                | 0              | -6.354107               | -1.559893 | -0.290890 |
| 33               | 1                | 0              | -5.027999               | -3.228849 | -0.590660 |
| 34               | 1                | 0              | -7.413864               | 0.283800  | 0.030289  |
| 35               | 1                | 0              | -7.255022               | -2.158975 | -0.361293 |

## Structure 14f (C<sub>2</sub>H<sub>5</sub>OH)

Energy (Hartrees): -953.087908191

No imaginary frequencies

Standard orientation:

| Center<br>Number | Atomic<br>Number | Atomic<br>Type | Coordinates (Angstroms) |           |           |
|------------------|------------------|----------------|-------------------------|-----------|-----------|
|                  |                  |                | X                       | Y         | Z         |
| 1                | 6                | 0              | 4.075178                | 0.942176  | -0.162147 |
| 2                | 6                | 0              | 2.773338                | 1.402580  | -0.082394 |
| 3                | 6                | 0              | 1.692160                | 0.516120  | 0.087112  |
| 4                | 6                | 0              | 1.975977                | -0.859417 | 0.182726  |
| 5                | 6                | 0              | 3.274299                | -1.334678 | 0.129922  |
| 6                | 6                | 0              | 4.308780                | -0.423996 | -0.050088 |
| 7                | 1                | 0              | 4.899932                | 1.631802  | -0.284274 |
| 8                | 1                | 0              | 2.601679                | 2.471255  | -0.118701 |
| 9                | 1                | 0              | 1.163983                | -1.571543 | 0.274026  |
| 10               | 1                | 0              | 3.481192                | -2.394356 | 0.202638  |
| 11               | 6                | 0              | 0.308062                | 1.006114  | 0.174256  |
| 12               | 6                | 0              | -0.573217               | 0.327812  | 1.012089  |
| 13               | 1                | 0              | -0.156255               | -0.343894 | 1.759434  |
| 14               | 6                | 0              | -0.021384               | 2.254291  | -0.474359 |
| 15               | 1                | 0              | 0.698428                | 2.590689  | -1.239358 |
| 16               | 1                | 0              | -2.349997               | -0.147193 | 1.772972  |
| 17               | 7                | 0              | -1.896949               | 0.367018  | 1.026032  |
| 18               | 8                | 0              | -0.984960               | 2.972531  | -0.214580 |
| 19               | 7                | 0              | 5.678794                | -0.915734 | -0.125471 |
| 20               | 8                | 0              | 6.573272                | -0.113893 | -0.328091 |
| 21               | 8                | 0              | 5.875964                | -2.109493 | 0.016716  |
| 22               | 6                | 0              | -2.774153               | 0.840276  | -0.041286 |
| 23               | 1                | 0              | -2.210175               | 0.779544  | -0.976747 |
| 24               | 1                | 0              | -3.043866               | 1.885534  | 0.113689  |
| 25               | 6                | 0              | -4.011040               | -0.022116 | -0.114610 |
| 26               | 6                | 0              | -3.900398               | -1.398804 | -0.326126 |
| 27               | 6                | 0              | -5.276295               | 0.547334  | 0.014078  |
| 28               | 6                | 0              | -5.039087               | -2.192303 | -0.407364 |
| 29               | 1                | 0              | -2.916918               | -1.847841 | -0.431859 |
| 30               | 6                | 0              | -6.419114               | -0.245685 | -0.071473 |
| 31               | 1                | 0              | -5.367030               | 1.615862  | 0.181252  |
| 32               | 6                | 0              | -6.302332               | -1.615827 | -0.280673 |
| 33               | 1                | 0              | -4.943158               | -3.259448 | -0.574120 |
| 34               | 1                | 0              | -7.398689               | 0.208223  | 0.030419  |
| 35               | 1                | 0              | -7.190901               | -2.234036 | -0.343640 |

## Structure 14g (vacuum)

Energy (Hartrees): -953.059292820

No imaginary frequencies

Standard orientation:

| Center<br>Number | Atomic<br>Number | Atomic<br>Type | Coordinates (Angstroms) |           |           |
|------------------|------------------|----------------|-------------------------|-----------|-----------|
|                  |                  |                | X                       | Y         | Z         |
| 1                | 6                | 0              | -2.279267               | -0.125189 | -1.126206 |
| 2                | 6                | 0              | -3.589282               | -0.569505 | -1.041718 |
| 3                | 6                | 0              | -4.303647               | -0.310457 | 0.118294  |
| 4                | 6                | 0              | -3.745811               | 0.367628  | 1.191706  |
| 5                | 6                | 0              | -2.429666               | 0.790850  | 1.096692  |
| 6                | 6                | 0              | -1.676833               | 0.564185  | -0.063927 |
| 7                | 1                | 0              | -1.725647               | -0.290070 | -2.043243 |
| 8                | 1                | 0              | -4.066736               | -1.094097 | -1.858398 |
| 9                | 1                | 0              | -4.333594               | 0.536685  | 2.083786  |
| 10               | 1                | 0              | -1.967928               | 1.280157  | 1.945950  |
| 11               | 6                | 0              | -0.285615               | 1.040297  | -0.171863 |
| 12               | 6                | 0              | 0.072977                | 2.259233  | 0.322228  |
| 13               | 6                | 0              | 0.722427                | 0.210806  | -0.816308 |
| 14               | 1                | 0              | -0.656010               | 2.913621  | 0.793155  |
| 15               | 1                | 0              | 0.417697                | -0.790531 | -1.145257 |
| 16               | 8                | 0              | 1.281627                | 2.768819  | 0.262247  |
| 17               | 1                | 0              | 1.860638                | 2.094893  | -0.207023 |
| 18               | 7                | 0              | 1.928440                | 0.608920  | -0.967864 |
| 19               | 7                | 0              | -5.699303               | -0.774299 | 0.213985  |
| 20               | 8                | 0              | -6.302852               | -0.530930 | 1.237006  |
| 21               | 8                | 0              | -6.158924               | -1.370541 | -0.736623 |
| 22               | 6                | 0              | 2.903597                | -0.295029 | -1.562035 |
| 23               | 1                | 0              | 3.309319                | 0.188838  | -2.454817 |
| 24               | 1                | 0              | 2.429811                | -1.236314 | -1.868595 |
| 25               | 6                | 0              | 4.022609                | -0.569040 | -0.583389 |
| 26               | 6                | 0              | 3.985948                | -1.694808 | 0.236169  |
| 27               | 6                | 0              | 5.079794                | 0.330346  | -0.455239 |
| 28               | 6                | 0              | 4.993062                | -1.922435 | 1.168771  |
| 29               | 1                | 0              | 3.165145                | -2.399150 | 0.143284  |
| 30               | 6                | 0              | 6.086029                | 0.108176  | 0.477529  |
| 31               | 1                | 0              | 5.111589                | 1.210538  | -1.089526 |
| 32               | 6                | 0              | 6.044097                | -1.020001 | 1.291423  |
| 33               | 1                | 0              | 4.958049                | -2.804250 | 1.797707  |
| 34               | 1                | 0              | 6.903462                | 0.813556  | 0.568750  |
| 35               | 1                | 0              | 6.828930                | -1.195349 | 2.017570  |



## Structure 14g (CHCl<sub>3</sub>)

Energy (Hartrees): -953.085372308

No imaginary frequencies

Standard orientation:

| Center<br>Number | Atomic<br>Number | Atomic<br>Type | Coordinates (Angstroms) |           |           |
|------------------|------------------|----------------|-------------------------|-----------|-----------|
|                  |                  |                | X                       | Y         | Z         |
| 1                | 6                | 0              | -2.214381               | -0.000007 | -1.141643 |
| 2                | 6                | 0              | -3.511280               | -0.485468 | -1.098462 |
| 3                | 6                | 0              | -4.236091               | -0.340298 | 0.076487  |
| 4                | 6                | 0              | -3.698451               | 0.264314  | 1.205078  |
| 5                | 6                | 0              | -2.396004               | 0.731101  | 1.149580  |
| 6                | 6                | 0              | -1.633845               | 0.619317  | -0.023964 |
| 7                | 1                | 0              | -1.656594               | -0.080609 | -2.067255 |
| 8                | 1                | 0              | -3.962337               | -0.955725 | -1.962000 |
| 9                | 1                | 0              | -4.283541               | 0.345852  | 2.111489  |
| 10               | 1                | 0              | -1.955211               | 1.166147  | 2.038556  |
| 11               | 6                | 0              | -0.256086               | 1.139619  | -0.084245 |
| 12               | 6                | 0              | 0.081298                | 2.290425  | 0.566641  |
| 13               | 6                | 0              | 0.765335                | 0.430632  | -0.843548 |
| 14               | 1                | 0              | -0.652132               | 2.867432  | 1.123992  |
| 15               | 1                | 0              | 0.483409                | -0.507776 | -1.333642 |
| 16               | 8                | 0              | 1.285066                | 2.820696  | 0.559966  |
| 17               | 1                | 0              | 1.869257                | 2.205075  | 0.003497  |
| 18               | 7                | 0              | 1.966693                | 0.868462  | -0.914323 |
| 19               | 7                | 0              | -5.609494               | -0.852886 | 0.130945  |
| 20               | 8                | 0              | -6.231653               | -0.711579 | 1.165287  |
| 21               | 8                | 0              | -6.057178               | -1.394307 | -0.860790 |
| 22               | 6                | 0              | 2.968428                | 0.082558  | -1.624905 |
| 23               | 1                | 0              | 3.461852                | 0.736515  | -2.347461 |
| 24               | 1                | 0              | 2.496208                | -0.744091 | -2.168755 |
| 25               | 6                | 0              | 3.988544                | -0.454870 | -0.645461 |
| 26               | 6                | 0              | 3.719009                | -1.625839 | 0.064051  |
| 27               | 6                | 0              | 5.177023                | 0.230266  | -0.399015 |
| 28               | 6                | 0              | 4.623356                | -2.106366 | 1.005001  |
| 29               | 1                | 0              | 2.793475                | -2.162739 | -0.122411 |
| 30               | 6                | 0              | 6.084254                | -0.247227 | 0.543818  |
| 31               | 1                | 0              | 5.393010                | 1.141800  | -0.947431 |
| 32               | 6                | 0              | 5.808374                | -1.415585 | 1.247558  |
| 33               | 1                | 0              | 4.404931                | -3.018624 | 1.548645  |
| 34               | 1                | 0              | 7.006157                | 0.292762  | 0.728152  |
| 35               | 1                | 0              | 6.514343                | -1.788949 | 1.980733  |

## Structure 14g (DMSO)

Energy (Hartrees): -953.083332846

No imaginary frequencies

Standard orientation:

| Center<br>Number | Atomic<br>Number | Atomic<br>Type | Coordinates (Angstroms) |           |           |
|------------------|------------------|----------------|-------------------------|-----------|-----------|
|                  |                  |                | X                       | Y         | Z         |
| 1                | 6                | 0              | -2.210836               | -0.190880 | -1.098145 |
| 2                | 6                | 0              | -3.508544               | -0.672612 | -1.042708 |
| 3                | 6                | 0              | -4.287014               | -0.362961 | 0.064857  |
| 4                | 6                | 0              | -3.800225               | 0.405261  | 1.115081  |
| 5                | 6                | 0              | -2.496830               | 0.866747  | 1.050937  |
| 6                | 6                | 0              | -1.680949               | 0.589593  | -0.058351 |
| 7                | 1                | 0              | -1.613995               | -0.409755 | -1.975464 |
| 8                | 1                | 0              | -3.914194               | -1.267957 | -1.849947 |
| 9                | 1                | 0              | -4.423371               | 0.621916  | 1.972545  |
| 10               | 1                | 0              | -2.100817               | 1.432341  | 1.885969  |
| 11               | 6                | 0              | -0.302473               | 1.104974  | -0.131374 |
| 12               | 6                | 0              | 0.019326                | 2.315494  | 0.412559  |
| 13               | 6                | 0              | 0.736891                | 0.334329  | -0.800590 |
| 14               | 1                | 0              | -0.725433               | 2.943058  | 0.895347  |
| 15               | 1                | 0              | 0.470659                | -0.643353 | -1.214476 |
| 16               | 8                | 0              | 1.224740                | 2.840581  | 0.379216  |
| 17               | 1                | 0              | 1.812938                | 2.169288  | -0.112681 |
| 18               | 7                | 0              | 1.938602                | 0.772352  | -0.884338 |
| 19               | 7                | 0              | -5.661670               | -0.865338 | 0.130443  |
| 20               | 8                | 0              | -6.324843               | -0.593216 | 1.113456  |
| 21               | 8                | 0              | -6.075784               | -1.529329 | -0.801064 |
| 22               | 6                | 0              | 2.948825                | -0.054378 | -1.528487 |
| 23               | 1                | 0              | 3.401236                | 0.523964  | -2.337533 |
| 24               | 1                | 0              | 2.488395                | -0.950023 | -1.964091 |
| 25               | 6                | 0              | 4.026876                | -0.457354 | -0.544890 |
| 26               | 6                | 0              | 3.686317                | -1.135936 | 0.627859  |
| 27               | 6                | 0              | 5.367679                | -0.173133 | -0.797770 |
| 28               | 6                | 0              | 4.670594                | -1.526187 | 1.529092  |
| 29               | 1                | 0              | 2.643612                | -1.359012 | 0.834562  |
| 30               | 6                | 0              | 6.356841                | -0.564483 | 0.102949  |
| 31               | 1                | 0              | 5.639310                | 0.358843  | -1.704030 |
| 32               | 6                | 0              | 6.010369                | -1.240912 | 1.268108  |
| 33               | 1                | 0              | 4.394717                | -2.055376 | 2.434485  |
| 34               | 1                | 0              | 7.396445                | -0.336955 | -0.105491 |
| 35               | 1                | 0              | 6.777979                | -1.545731 | 1.970457  |

## Structure 14g (C<sub>2</sub>H<sub>5</sub>OH)

Energy (Hartrees): -953.083854816

No imaginary frequencies

Standard orientation:

| Center<br>Number | Atomic<br>Number | Atomic<br>Type | Coordinates (Angstroms) |           |           |
|------------------|------------------|----------------|-------------------------|-----------|-----------|
|                  |                  |                | X                       | Y         | Z         |
| 1                | 6                | 0              | -2.208130               | -0.168463 | -1.106278 |
| 2                | 6                | 0              | -3.502659               | -0.657293 | -1.052646 |
| 3                | 6                | 0              | -4.276791               | -0.367024 | 0.063492  |
| 4                | 6                | 0              | -3.789814               | 0.386303  | 1.124774  |
| 5                | 6                | 0              | -2.488251               | 0.852151  | 1.062550  |
| 6                | 6                | 0              | -1.677312               | 0.596904  | -0.055616 |
| 7                | 1                | 0              | -1.615578               | -0.367391 | -1.991239 |
| 8                | 1                | 0              | -3.910869               | -1.239026 | -1.868575 |
| 9                | 1                | 0              | -4.408899               | 0.584257  | 1.989905  |
| 10               | 1                | 0              | -2.088685               | 1.402211  | 1.906222  |
| 11               | 6                | 0              | -0.301058               | 1.118777  | -0.127901 |
| 12               | 6                | 0              | 0.013450                | 2.327004  | 0.420055  |
| 13               | 6                | 0              | 0.739878                | 0.350168  | -0.799929 |
| 14               | 1                | 0              | -0.730353               | 2.951694  | 0.907388  |
| 15               | 1                | 0              | 0.473597                | -0.631031 | -1.205720 |
| 16               | 8                | 0              | 1.220708                | 2.860008  | 0.386727  |
| 17               | 1                | 0              | 1.816946                | 2.199608  | -0.106497 |
| 18               | 7                | 0              | 1.939131                | 0.790847  | -0.892950 |
| 19               | 7                | 0              | -5.645023               | -0.874746 | 0.125829  |
| 20               | 8                | 0              | -6.341529               | -0.544985 | 1.068087  |
| 21               | 8                | 0              | -6.032952               | -1.606495 | -0.766452 |
| 22               | 6                | 0              | 2.946155                | -0.045127 | -1.531302 |
| 23               | 1                | 0              | 3.405893                | 0.528117  | -2.339695 |
| 24               | 1                | 0              | 2.481240                | -0.937534 | -1.968870 |
| 25               | 6                | 0              | 4.018032                | -0.456325 | -0.544753 |
| 26               | 6                | 0              | 3.670403                | -1.134654 | 0.626013  |
| 27               | 6                | 0              | 5.361495                | -0.182770 | -0.795264 |
| 28               | 6                | 0              | 4.650384                | -1.535289 | 1.527358  |
| 29               | 1                | 0              | 2.625707                | -1.350111 | 0.831355  |
| 30               | 6                | 0              | 6.346300                | -0.584553 | 0.105525  |
| 31               | 1                | 0              | 5.638947                | 0.348955  | -1.700003 |
| 32               | 6                | 0              | 5.992806                | -1.260892 | 1.268561  |
| 33               | 1                | 0              | 4.369150                | -2.064518 | 2.431195  |
| 34               | 1                | 0              | 7.388076                | -0.365195 | -0.101378 |
| 35               | 1                | 0              | 6.756932                | -1.574468 | 1.971040  |

## Structure 14h (vacuum)

Energy (Hartrees): -953.036981391  
No imaginary frequencies

Standard orientation:

| Center<br>Number | Atomic<br>Number | Atomic<br>Type | Coordinates (Angstroms) |           |           |
|------------------|------------------|----------------|-------------------------|-----------|-----------|
|                  |                  |                | X                       | Y         | Z         |
| 1                | 6                | 0              | 3.551287                | -1.118057 | -0.517004 |
| 2                | 6                | 0              | 2.226191                | -0.742663 | -0.674486 |
| 3                | 6                | 0              | 1.748720                | 0.467095  | -0.151280 |
| 4                | 6                | 0              | 2.637571                | 1.287254  | 0.556832  |
| 5                | 6                | 0              | 3.969040                | 0.935003  | 0.710404  |
| 6                | 6                | 0              | 4.402898                | -0.265765 | 0.169219  |
| 7                | 1                | 0              | 3.933504                | -2.045463 | -0.922087 |
| 8                | 1                | 0              | 1.554532                | -1.384748 | -1.232756 |
| 9                | 1                | 0              | 2.274097                | 2.197527  | 1.018434  |
| 10               | 1                | 0              | 4.664057                | 1.558857  | 1.255977  |
| 11               | 6                | 0              | 0.331485                | 0.841063  | -0.347905 |
| 12               | 6                | 0              | 0.017002                | 2.127110  | -0.579280 |
| 13               | 1                | 0              | 0.804394                | 2.872428  | -0.660010 |
| 14               | 6                | 0              | -0.677645               | -0.233133 | -0.262581 |
| 15               | 1                | 0              | -0.398671               | -1.085485 | 0.376309  |
| 16               | 7                | 0              | -1.788784               | -0.192216 | -0.864771 |
| 17               | 8                | 0              | -1.241991               | 2.575250  | -0.720363 |
| 18               | 1                | 0              | -1.236206               | 3.520647  | -0.886320 |
| 19               | 7                | 0              | 5.815847                | -0.653312 | 0.338285  |
| 20               | 8                | 0              | 6.544891                | 0.124297  | 0.916190  |
| 21               | 8                | 0              | 6.161736                | -1.724541 | -0.111348 |
| 22               | 6                | 0              | -2.710537               | -1.286300 | -0.649165 |
| 23               | 1                | 0              | -2.301669               | -2.047439 | 0.033134  |
| 24               | 1                | 0              | -2.880544               | -1.768294 | -1.618541 |
| 25               | 6                | 0              | -4.047381               | -0.805828 | -0.118097 |
| 26               | 6                | 0              | -5.040372               | -1.746854 | 0.158955  |
| 27               | 6                | 0              | -4.310840               | 0.544212  | 0.099004  |
| 28               | 6                | 0              | -6.278608               | -1.348375 | 0.645133  |
| 29               | 1                | 0              | -4.839845               | -2.801126 | -0.008142 |
| 30               | 6                | 0              | -5.553694               | 0.943029  | 0.586950  |
| 31               | 1                | 0              | -3.540645               | 1.274608  | -0.121104 |
| 32               | 6                | 0              | -6.539136               | 0.002780  | 0.861106  |
| 33               | 1                | 0              | -7.040505               | -2.090233 | 0.854661  |
| 34               | 1                | 0              | -5.750745               | 1.996016  | 0.753188  |
| 35               | 1                | 0              | -7.504166               | 0.317932  | 1.240000  |

## Structure 14h (CHCl<sub>3</sub>)

Energy (Hartrees): -953.068027076

No imaginary frequencies

Standard orientation:

| Center<br>Number | Atomic<br>Number | Atomic<br>Type | Coordinates (Angstroms) |           |           |
|------------------|------------------|----------------|-------------------------|-----------|-----------|
|                  |                  |                | X                       | Y         | Z         |
| 1                | 6                | 0              | 3.518649                | -1.157523 | -0.449872 |
| 2                | 6                | 0              | 2.198856                | -0.769919 | -0.617967 |
| 3                | 6                | 0              | 1.746825                | 0.481108  | -0.171108 |
| 4                | 6                | 0              | 2.659365                | 1.332808  | 0.470340  |
| 5                | 6                | 0              | 3.985095                | 0.968147  | 0.633250  |
| 6                | 6                | 0              | 4.392806                | -0.276243 | 0.170502  |
| 7                | 1                | 0              | 3.870609                | -2.118381 | -0.801204 |
| 8                | 1                | 0              | 1.513658                | -1.440013 | -1.124598 |
| 9                | 1                | 0              | 2.322238                | 2.281835  | 0.869853  |
| 10               | 1                | 0              | 4.690034                | 1.622787  | 1.128231  |
| 11               | 6                | 0              | 0.332448                | 0.861756  | -0.370683 |
| 12               | 6                | 0              | 0.019384                | 2.151986  | -0.598417 |
| 13               | 1                | 0              | 0.799658                | 2.904054  | -0.681735 |
| 14               | 6                | 0              | -0.681422               | -0.205562 | -0.271882 |
| 15               | 1                | 0              | -0.420822               | -1.038951 | 0.396510  |
| 16               | 7                | 0              | -1.784185               | -0.187424 | -0.896297 |
| 17               | 8                | 0              | -1.237701               | 2.596882  | -0.728852 |
| 18               | 1                | 0              | -1.230034               | 3.549354  | -0.879881 |
| 19               | 7                | 0              | 5.793435                | -0.675549 | 0.352061  |
| 20               | 8                | 0              | 6.548206                | 0.115214  | 0.882745  |
| 21               | 8                | 0              | 6.129429                | -1.776230 | -0.037665 |
| 22               | 6                | 0              | -2.700174               | -1.284210 | -0.652776 |
| 23               | 1                | 0              | -2.279724               | -2.026117 | 0.041608  |
| 24               | 1                | 0              | -2.876349               | -1.790548 | -1.607979 |
| 25               | 6                | 0              | -4.035893               | -0.805721 | -0.118111 |
| 26               | 6                | 0              | -5.063116               | -1.736819 | 0.059054  |
| 27               | 6                | 0              | -4.267059               | 0.527933  | 0.213168  |
| 28               | 6                | 0              | -6.298450               | -1.344262 | 0.559123  |
| 29               | 1                | 0              | -4.889780               | -2.777774 | -0.198671 |
| 30               | 6                | 0              | -5.507929               | 0.922500  | 0.713080  |
| 31               | 1                | 0              | -3.476893               | 1.256730  | 0.069148  |
| 32               | 6                | 0              | -6.525211               | -0.008617 | 0.888468  |
| 33               | 1                | 0              | -7.085253               | -2.078781 | 0.690603  |
| 34               | 1                | 0              | -5.677695               | 1.963657  | 0.965004  |
| 35               | 1                | 0              | -7.488902               | 0.301855  | 1.275918  |

## Structure 14h (DMSO)

Energy (Hartrees): -953.065411639

No imaginary frequencies

Standard orientation:

| Center<br>Number | Atomic<br>Number | Atomic<br>Type | Coordinates (Angstroms) |           |           |
|------------------|------------------|----------------|-------------------------|-----------|-----------|
|                  |                  |                | X                       | Y         | Z         |
| 1                | 6                | 0              | 3.490015                | -1.198210 | -0.360638 |
| 2                | 6                | 0              | 2.172421                | -0.807446 | -0.539074 |
| 3                | 6                | 0              | 1.742367                | 0.481209  | -0.186926 |
| 4                | 6                | 0              | 2.675842                | 1.368818  | 0.372378  |
| 5                | 6                | 0              | 3.998583                | 0.999614  | 0.544890  |
| 6                | 6                | 0              | 4.385575                | -0.282651 | 0.174554  |
| 7                | 1                | 0              | 3.818886                | -2.190061 | -0.641029 |
| 8                | 1                | 0              | 1.472928                | -1.510463 | -0.977135 |
| 9                | 1                | 0              | 2.361709                | 2.352372  | 0.700186  |
| 10               | 1                | 0              | 4.714933                | 1.686102  | 0.976634  |
| 11               | 6                | 0              | 0.330621                | 0.864908  | -0.399627 |
| 12               | 6                | 0              | 0.030357                | 2.149930  | -0.673678 |
| 13               | 1                | 0              | 0.817218                | 2.891276  | -0.782797 |
| 14               | 6                | 0              | -0.688224               | -0.192813 | -0.255629 |
| 15               | 1                | 0              | -0.439384               | -0.987685 | 0.461316  |
| 16               | 7                | 0              | -1.782384               | -0.214275 | -0.897352 |
| 17               | 8                | 0              | -1.221734               | 2.604618  | -0.818220 |
| 18               | 1                | 0              | -1.197189               | 3.556651  | -0.975908 |
| 19               | 7                | 0              | 5.783014                | -0.683599 | 0.363815  |
| 20               | 8                | 0              | 6.549481                | 0.124204  | 0.853003  |
| 21               | 8                | 0              | 6.109760                | -1.804102 | 0.021788  |
| 22               | 6                | 0              | -2.694913               | -1.305466 | -0.606347 |
| 23               | 1                | 0              | -2.269961               | -2.011009 | 0.122083  |
| 24               | 1                | 0              | -2.868205               | -1.857440 | -1.535616 |
| 25               | 6                | 0              | -4.032118               | -0.809543 | -0.093831 |
| 26               | 6                | 0              | -5.133002               | -1.670167 | -0.123488 |
| 27               | 6                | 0              | -4.190037               | 0.470339  | 0.436780  |
| 28               | 6                | 0              | -6.365348               | -1.264325 | 0.375864  |
| 29               | 1                | 0              | -5.018982               | -2.665720 | -0.542469 |
| 30               | 6                | 0              | -5.426879               | 0.880061  | 0.934205  |
| 31               | 1                | 0              | -3.346024               | 1.151269  | 0.452456  |
| 32               | 6                | 0              | -6.516228               | 0.015803  | 0.907680  |
| 33               | 1                | 0              | -7.209940               | -1.943901 | 0.346408  |
| 34               | 1                | 0              | -5.537246               | 1.878961  | 1.342157  |
| 35               | 1                | 0              | -7.477406               | 0.336653  | 1.293250  |

## Structure 14h (C<sub>2</sub>H<sub>5</sub>OH)

Energy (Hartrees): -953.071298098

No imaginary frequencies

Standard orientation:

| Center<br>Number | Atomic<br>Number | Atomic<br>Type | Coordinates (Angstroms) |           |           |
|------------------|------------------|----------------|-------------------------|-----------|-----------|
|                  |                  |                | X                       | Y         | Z         |
| 1                | 6                | 0              | 3.478868                | -1.206783 | -0.317503 |
| 2                | 6                | 0              | 2.161439                | -0.826856 | -0.514405 |
| 3                | 6                | 0              | 1.726103                | 0.473346  | -0.213358 |
| 4                | 6                | 0              | 2.654669                | 1.385003  | 0.315502  |
| 5                | 6                | 0              | 3.977204                | 1.026475  | 0.507694  |
| 6                | 6                | 0              | 4.369201                | -0.268045 | 0.186709  |
| 7                | 1                | 0              | 3.811534                | -2.207235 | -0.560872 |
| 8                | 1                | 0              | 1.465621                | -1.547028 | -0.930083 |
| 9                | 1                | 0              | 2.336969                | 2.379859  | 0.603648  |
| 10               | 1                | 0              | 4.689528                | 1.731023  | 0.916437  |
| 11               | 6                | 0              | 0.314572                | 0.839748  | -0.450277 |
| 12               | 6                | 0              | 0.006239                | 2.109661  | -0.783338 |
| 13               | 1                | 0              | 0.783361                | 2.857613  | -0.911067 |
| 14               | 6                | 0              | -0.696678               | -0.219539 | -0.270440 |
| 15               | 1                | 0              | -0.452012               | -0.974775 | 0.489319  |
| 16               | 7                | 0              | -1.781862               | -0.283151 | -0.925664 |
| 17               | 8                | 0              | -1.247576               | 2.542402  | -0.972389 |
| 18               | 1                | 0              | -1.238900               | 3.486394  | -1.173461 |
| 19               | 7                | 0              | 5.763910                | -0.654315 | 0.390102  |
| 20               | 8                | 0              | 6.530774                | 0.169644  | 0.853358  |
| 21               | 8                | 0              | 6.102189                | -1.783061 | 0.085268  |
| 22               | 6                | 0              | -2.696459               | -1.359581 | -0.580992 |
| 23               | 1                | 0              | -2.258552               | -2.041316 | 0.162183  |
| 24               | 1                | 0              | -2.895246               | -1.939708 | -1.486369 |
| 25               | 6                | 0              | -4.014151               | -0.827674 | -0.055397 |
| 26               | 6                | 0              | -5.195357               | -1.530092 | -0.302159 |
| 27               | 6                | 0              | -4.071184               | 0.339978  | 0.707044  |
| 28               | 6                | 0              | -6.409402               | -1.080595 | 0.209087  |
| 29               | 1                | 0              | -5.163566               | -2.434650 | -0.902161 |
| 30               | 6                | 0              | -5.285813               | 0.794102  | 1.215669  |
| 31               | 1                | 0              | -3.163278               | 0.901364  | 0.901382  |
| 32               | 6                | 0              | -6.458481               | 0.085651  | 0.969181  |
| 33               | 1                | 0              | -7.318306               | -1.636357 | 0.005757  |
| 34               | 1                | 0              | -5.314828               | 1.704751  | 1.804146  |
| 35               | 1                | 0              | -7.404386               | 0.441652  | 1.362083  |

## Structure 14i (vacuum)

Energy (Hartrees): -953.042581203

No imaginary frequencies

Standard orientation:

| Center<br>Number | Atomic<br>Number | Atomic<br>Type | Coordinates (Angstroms) |           |           |
|------------------|------------------|----------------|-------------------------|-----------|-----------|
|                  |                  |                | X                       | Y         | Z         |
| 1                | 6                | 0              | 3.461358                | -1.124029 | -0.609265 |
| 2                | 6                | 0              | 2.129801                | -0.752130 | -0.711173 |
| 3                | 6                | 0              | 1.650361                | 0.407764  | -0.087126 |
| 4                | 6                | 0              | 2.544936                | 1.191314  | 0.655044  |
| 5                | 6                | 0              | 3.878404                | 0.832120  | 0.767536  |
| 6                | 6                | 0              | 4.314472                | -0.320485 | 0.130659  |
| 7                | 1                | 0              | 3.845311                | -2.011145 | -1.094323 |
| 8                | 1                | 0              | 1.455245                | -1.360065 | -1.303331 |
| 9                | 1                | 0              | 2.190117                | 2.085492  | 1.148528  |
| 10               | 1                | 0              | 4.578402                | 1.424366  | 1.341116  |
| 11               | 6                | 0              | 0.224071                | 0.762025  | -0.222717 |
| 12               | 6                | 0              | -0.245675               | 2.017962  | -0.282857 |
| 13               | 1                | 0              | -1.314180               | 2.181919  | -0.383653 |
| 14               | 6                | 0              | -0.770654               | -0.330861 | -0.292168 |
| 15               | 1                | 0              | -0.487483               | -1.262904 | 0.218393  |
| 16               | 7                | 0              | -1.889947               | -0.203430 | -0.869305 |
| 17               | 8                | 0              | 0.548460                | 3.107616  | -0.244653 |
| 18               | 1                | 0              | 0.020150                | 3.904451  | -0.329182 |
| 19               | 7                | 0              | 5.733967                | -0.705103 | 0.244085  |
| 20               | 8                | 0              | 6.457693                | 0.007677  | 0.905931  |
| 21               | 8                | 0              | 6.090587                | -1.711093 | -0.331573 |
| 22               | 6                | 0              | -2.833383               | -1.307034 | -0.778129 |
| 23               | 1                | 0              | -2.448773               | -2.137521 | -0.170407 |
| 24               | 1                | 0              | -2.997934               | -1.681421 | -1.794555 |
| 25               | 6                | 0              | -4.153025               | -0.824662 | -0.216020 |
| 26               | 6                | 0              | -4.742915               | -1.451468 | 0.877393  |
| 27               | 6                | 0              | -4.796915               | 0.267264  | -0.801123 |
| 28               | 6                | 0              | -5.963333               | -1.001746 | 1.377861  |
| 29               | 1                | 0              | -4.247227               | -2.296615 | 1.343958  |
| 30               | 6                | 0              | -6.011691               | 0.718785  | -0.302890 |
| 31               | 1                | 0              | -4.331075               | 0.762185  | -1.646140 |
| 32               | 6                | 0              | -6.599222               | 0.084214  | 0.789559  |
| 33               | 1                | 0              | -6.412960               | -1.499124 | 2.229267  |
| 34               | 1                | 0              | -6.503829               | 1.565827  | -0.766721 |
| 35               | 1                | 0              | -7.547354               | 0.436488  | 1.178453  |



## Structure 14i (CHCl<sub>3</sub>)

Energy (Hartrees): -953.071998775

No imaginary frequencies

Standard orientation:

| Center<br>Number | Atomic<br>Number | Atomic<br>Type | Coordinates (Angstroms) |           |           |
|------------------|------------------|----------------|-------------------------|-----------|-----------|
|                  |                  |                | X                       | Y         | Z         |
| 1                | 6                | 0              | 3.445197                | -1.124672 | -0.604862 |
| 2                | 6                | 0              | 2.114779                | -0.752217 | -0.712696 |
| 3                | 6                | 0              | 1.634743                | 0.414774  | -0.099297 |
| 4                | 6                | 0              | 2.529670                | 1.201727  | 0.641725  |
| 5                | 6                | 0              | 3.862198                | 0.842995  | 0.760158  |
| 6                | 6                | 0              | 4.298915                | -0.315286 | 0.130788  |
| 7                | 1                | 0              | 3.819486                | -2.018611 | -1.085562 |
| 8                | 1                | 0              | 1.443646                | -1.368061 | -1.300712 |
| 9                | 1                | 0              | 2.177075                | 2.096006  | 1.137435  |
| 10               | 1                | 0              | 4.553473                | 1.443925  | 1.335835  |
| 11               | 6                | 0              | 0.209479                | 0.771814  | -0.239130 |
| 12               | 6                | 0              | -0.251820               | 2.033916  | -0.308934 |
| 13               | 1                | 0              | -1.318303               | 2.216234  | -0.398420 |
| 14               | 6                | 0              | -0.783605               | -0.321235 | -0.301639 |
| 15               | 1                | 0              | -0.512921               | -1.240921 | 0.234662  |
| 16               | 7                | 0              | -1.892099               | -0.212909 | -0.908038 |
| 17               | 8                | 0              | 0.548365                | 3.112435  | -0.291922 |
| 18               | 1                | 0              | 0.019412                | 3.915943  | -0.362308 |
| 19               | 7                | 0              | 5.711034                | -0.699677 | 0.251338  |
| 20               | 8                | 0              | 6.443118                | 0.014502  | 0.907074  |
| 21               | 8                | 0              | 6.077280                | -1.713212 | -0.310141 |
| 22               | 6                | 0              | -2.828828               | -1.326269 | -0.803912 |
| 23               | 1                | 0              | -2.426429               | -2.147930 | -0.198317 |
| 24               | 1                | 0              | -3.006176               | -1.701987 | -1.816884 |
| 25               | 6                | 0              | -4.139853               | -0.846900 | -0.220839 |
| 26               | 6                | 0              | -4.592411               | -1.310610 | 1.012653  |
| 27               | 6                | 0              | -4.906476               | 0.092925  | -0.914240 |
| 28               | 6                | 0              | -5.795459               | -0.848504 | 1.544935  |
| 29               | 1                | 0              | -4.003423               | -2.039238 | 1.560777  |
| 30               | 6                | 0              | -6.103761               | 0.558327  | -0.384750 |
| 31               | 1                | 0              | -4.555592               | 0.459804  | -1.873622 |
| 32               | 6                | 0              | -6.552207               | 0.087095  | 0.848687  |
| 33               | 1                | 0              | -6.138810               | -1.219628 | 2.504214  |
| 34               | 1                | 0              | -6.690085               | 1.286847  | -0.933524 |
| 35               | 1                | 0              | -7.487366               | 0.448652  | 1.261350  |

## Structure 14i (DMSO)

Energy (Hartrees): -953.068259803

No imaginary frequencies

Standard orientation:

| Center<br>Number | Atomic<br>Number | Atomic<br>Type | Coordinates (Angstroms) |           |           |
|------------------|------------------|----------------|-------------------------|-----------|-----------|
|                  |                  |                | X                       | Y         | Z         |
| 1                | 6                | 0              | 3.440696                | -1.123870 | -0.608236 |
| 2                | 6                | 0              | 2.111336                | -0.748023 | -0.717363 |
| 3                | 6                | 0              | 1.633866                | 0.418032  | -0.100530 |
| 4                | 6                | 0              | 2.527957                | 1.198359  | 0.648430  |
| 5                | 6                | 0              | 3.859695                | 0.836875  | 0.767270  |
| 6                | 6                | 0              | 4.295421                | -0.318682 | 0.131476  |
| 7                | 1                | 0              | 3.809296                | -2.018123 | -1.092865 |
| 8                | 1                | 0              | 1.440186                | -1.362743 | -1.306609 |
| 9                | 1                | 0              | 2.177018                | 2.088730  | 1.152537  |
| 10               | 1                | 0              | 4.547741                | 1.434724  | 1.350114  |
| 11               | 6                | 0              | 0.209990                | 0.780217  | -0.242480 |
| 12               | 6                | 0              | -0.246067               | 2.044532  | -0.313522 |
| 13               | 1                | 0              | -1.312175               | 2.233854  | -0.394936 |
| 14               | 6                | 0              | -0.783728               | -0.312444 | -0.302818 |
| 15               | 1                | 0              | -0.510150               | -1.234923 | 0.225633  |
| 16               | 7                | 0              | -1.894963               | -0.202194 | -0.905735 |
| 17               | 8                | 0              | 0.559056                | 3.119226  | -0.307934 |
| 18               | 1                | 0              | 0.027637                | 3.924019  | -0.353054 |
| 19               | 7                | 0              | 5.706503                | -0.704591 | 0.250260  |
| 20               | 8                | 0              | 6.447676                | 0.023048  | 0.882538  |
| 21               | 8                | 0              | 6.066381                | -1.733073 | -0.289700 |
| 22               | 6                | 0              | -2.826637               | -1.322197 | -0.805519 |
| 23               | 1                | 0              | -2.419760               | -2.141331 | -0.200725 |
| 24               | 1                | 0              | -3.002529               | -1.695056 | -1.819672 |
| 25               | 6                | 0              | -4.138578               | -0.848367 | -0.221180 |
| 26               | 6                | 0              | -4.562479               | -1.277581 | 1.035277  |
| 27               | 6                | 0              | -4.933586               | 0.053758  | -0.933220 |
| 28               | 6                | 0              | -5.765263               | -0.819095 | 1.571973  |
| 29               | 1                | 0              | -3.950169               | -1.975731 | 1.597491  |
| 30               | 6                | 0              | -6.130879               | 0.516037  | -0.399227 |
| 31               | 1                | 0              | -4.608626               | 0.392510  | -1.912141 |
| 32               | 6                | 0              | -6.550486               | 0.079180  | 0.857041  |
| 33               | 1                | 0              | -6.085967               | -1.163925 | 2.548797  |
| 34               | 1                | 0              | -6.740220               | 1.213957  | -0.962757 |
| 35               | 1                | 0              | -7.485511               | 0.437535  | 1.273057  |

## Structure 14i (C<sub>2</sub>H<sub>5</sub>OH)

Energy (Hartrees): -953.073836389

No imaginary frequencies

Standard orientation:

| Center<br>Number | Atomic<br>Number | Atomic<br>Type | Coordinates (Angstroms) |           |           |
|------------------|------------------|----------------|-------------------------|-----------|-----------|
|                  |                  |                | X                       | Y         | Z         |
| 1                | 6                | 0              | 3.382091                | -1.200965 | -0.503847 |
| 2                | 6                | 0              | 2.074172                | -0.812232 | -0.743930 |
| 3                | 6                | 0              | 1.586392                | 0.419893  | -0.281637 |
| 4                | 6                | 0              | 2.447771                | 1.255639  | 0.445915  |
| 5                | 6                | 0              | 3.756566                | 0.881542  | 0.698218  |
| 6                | 6                | 0              | 4.202977                | -0.342221 | 0.214786  |
| 7                | 1                | 0              | 3.758918                | -2.146987 | -0.869743 |
| 8                | 1                | 0              | 1.427833                | -1.468817 | -1.315730 |
| 9                | 1                | 0              | 2.086192                | 2.199212  | 0.832193  |
| 10               | 1                | 0              | 4.417681                | 1.522496  | 1.266357  |
| 11               | 6                | 0              | 0.182815                | 0.790433  | -0.548373 |
| 12               | 6                | 0              | -0.231063               | 2.050822  | -0.784641 |
| 13               | 1                | 0              | -1.283222               | 2.260644  | -0.948707 |
| 14               | 6                | 0              | -0.829577               | -0.283861 | -0.536077 |
| 15               | 1                | 0              | -0.572299               | -1.168679 | 0.060619  |
| 16               | 7                | 0              | -1.940360               | -0.208124 | -1.148086 |
| 17               | 8                | 0              | 0.604169                | 3.098025  | -0.851200 |
| 18               | 1                | 0              | 0.107749                | 3.909180  | -1.017139 |
| 19               | 7                | 0              | 5.587178                | -0.740241 | 0.473559  |
| 20               | 8                | 0              | 6.279147                | -0.011208 | 1.159289  |
| 21               | 8                | 0              | 5.988885                | -1.783268 | -0.007349 |
| 22               | 6                | 0              | -2.883762               | -1.301775 | -0.940641 |
| 23               | 1                | 0              | -2.413272               | -2.136193 | -0.403947 |
| 24               | 1                | 0              | -3.211520               | -1.663374 | -1.917928 |
| 25               | 6                | 0              | -4.089735               | -0.815529 | -0.165868 |
| 26               | 6                | 0              | -3.934371               | -0.363863 | 1.147152  |
| 27               | 6                | 0              | -5.359388               | -0.800288 | -0.739711 |
| 28               | 6                | 0              | -5.029642               | 0.087678  | 1.874800  |
| 29               | 1                | 0              | -2.946542               | -0.367987 | 1.599657  |
| 30               | 6                | 0              | -6.460134               | -0.348160 | -0.013262 |
| 31               | 1                | 0              | -5.488681               | -1.145793 | -1.760613 |
| 32               | 6                | 0              | -6.297623               | 0.096190  | 1.294818  |
| 33               | 1                | 0              | -4.896893               | 0.432655  | 2.894377  |
| 34               | 1                | 0              | -7.443125               | -0.342899 | -0.471288 |
| 35               | 1                | 0              | -7.153076               | 0.446897  | 1.861441  |

## Structure 14j (vacuum)

Energy (Hartrees): -953.044416638

No imaginary frequencies

Standard orientation:

| Center<br>Number | Atomic<br>Number | Atomic<br>Type | Coordinates (Angstroms) |           |           |
|------------------|------------------|----------------|-------------------------|-----------|-----------|
|                  |                  |                | X                       | Y         | Z         |
| 1                | 6                | 0              | 1.796742                | -1.241385 | -0.506928 |
| 2                | 6                | 0              | 0.952970                | -0.142365 | -0.533657 |
| 3                | 6                | 0              | 1.386265                | 1.101569  | -0.059836 |
| 4                | 6                | 0              | 2.681036                | 1.223324  | 0.452698  |
| 5                | 6                | 0              | 3.534731                | 0.130704  | 0.493321  |
| 6                | 6                | 0              | 3.074423                | -1.083643 | 0.009849  |
| 7                | 1                | 0              | 1.481797                | -2.208219 | -0.875132 |
| 8                | 1                | 0              | -0.051755               | -0.246726 | -0.920983 |
| 9                | 1                | 0              | 3.021249                | 2.181001  | 0.824547  |
| 10               | 1                | 0              | 4.537574                | 0.206189  | 0.890810  |
| 11               | 6                | 0              | 0.482457                | 2.274002  | -0.112021 |
| 12               | 6                | 0              | 0.881061                | 3.480375  | -0.545715 |
| 13               | 1                | 0              | 0.181247                | 4.311330  | -0.582154 |
| 14               | 6                | 0              | -0.922376               | 2.160638  | 0.304942  |
| 15               | 1                | 0              | -1.532599               | 3.065529  | 0.157837  |
| 16               | 7                | 0              | -1.410000               | 1.106747  | 0.805178  |
| 17               | 8                | 0              | 2.140145                | 3.735317  | -0.958584 |
| 18               | 1                | 0              | 2.205827                | 4.627866  | -1.305024 |
| 19               | 7                | 0              | 3.976555                | -2.251253 | 0.046686  |
| 20               | 8                | 0              | 5.090735                | -2.086972 | 0.496155  |
| 21               | 8                | 0              | 3.549664                | -3.304947 | -0.374726 |
| 22               | 6                | 0              | -2.815224               | 1.107052  | 1.165733  |
| 23               | 1                | 0              | -3.314048               | 2.054010  | 0.913498  |
| 24               | 1                | 0              | -2.874172               | 0.980927  | 2.253098  |
| 25               | 6                | 0              | -3.540050               | -0.045637 | 0.502906  |
| 26               | 6                | 0              | -4.824686               | 0.125836  | -0.006207 |
| 27               | 6                | 0              | -2.936023               | -1.301045 | 0.414377  |
| 28               | 6                | 0              | -5.503739               | -0.940545 | -0.589878 |
| 29               | 1                | 0              | -5.298843               | 1.100537  | 0.051068  |
| 30               | 6                | 0              | -3.611714               | -2.365262 | -0.170440 |
| 31               | 1                | 0              | -1.932158               | -1.429916 | 0.803406  |
| 32               | 6                | 0              | -4.898371               | -2.188571 | -0.673541 |
| 33               | 1                | 0              | -6.502506               | -0.793237 | -0.984112 |
| 34               | 1                | 0              | -3.134288               | -3.336326 | -0.234531 |
| 35               | 1                | 0              | -5.422578               | -3.018888 | -1.131743 |

## Structure 14j (CHCl<sub>3</sub>)

Energy (Hartrees): -953.074829411

No imaginary frequencies

Standard orientation:

| Center<br>Number | Atomic<br>Number | Atomic<br>Type | Coordinates (Angstroms) |           |           |
|------------------|------------------|----------------|-------------------------|-----------|-----------|
|                  |                  |                | X                       | Y         | Z         |
| 1                | 6                | 0              | 1.851947                | -1.235753 | -0.517926 |
| 2                | 6                | 0              | 0.977422                | -0.161206 | -0.533847 |
| 3                | 6                | 0              | 1.372904                | 1.092502  | -0.050111 |
| 4                | 6                | 0              | 2.666009                | 1.248113  | 0.461383  |
| 5                | 6                | 0              | 3.552579                | 0.182065  | 0.489663  |
| 6                | 6                | 0              | 3.127180                | -1.043024 | -0.003411 |
| 7                | 1                | 0              | 1.555183                | -2.204677 | -0.896398 |
| 8                | 1                | 0              | -0.021741               | -0.292338 | -0.928102 |
| 9                | 1                | 0              | 2.979911                | 2.210496  | 0.845546  |
| 10               | 1                | 0              | 4.551934                | 0.293531  | 0.888302  |
| 11               | 6                | 0              | 0.434551                | 2.237595  | -0.092986 |
| 12               | 6                | 0              | 0.792517                | 3.449848  | -0.554497 |
| 13               | 1                | 0              | 0.071990                | 4.263340  | -0.589742 |
| 14               | 6                | 0              | -0.955055               | 2.096326  | 0.355725  |
| 15               | 1                | 0              | -1.582418               | 2.988747  | 0.220667  |
| 16               | 7                | 0              | -1.412854               | 1.034372  | 0.875527  |
| 17               | 8                | 0              | 2.027267                | 3.722946  | -1.006994 |
| 18               | 1                | 0              | 2.067834                | 4.627417  | -1.338960 |
| 19               | 7                | 0              | 4.061675                | -2.177348 | 0.018538  |
| 20               | 8                | 0              | 5.177980                | -1.990084 | 0.460156  |
| 21               | 8                | 0              | 3.671894                | -3.246916 | -0.405591 |
| 22               | 6                | 0              | -2.814600               | 1.023591  | 1.266384  |
| 23               | 1                | 0              | -3.311328               | 1.982366  | 1.067621  |
| 24               | 1                | 0              | -2.854079               | 0.842403  | 2.346243  |
| 25               | 6                | 0              | -3.555095               | -0.089479 | 0.555530  |
| 26               | 6                | 0              | -4.752857               | 0.164774  | -0.109235 |
| 27               | 6                | 0              | -3.045486               | -1.390699 | 0.559826  |
| 28               | 6                | 0              | -5.438013               | -0.862761 | -0.756320 |
| 29               | 1                | 0              | -5.152645               | 1.173763  | -0.123305 |
| 30               | 6                | 0              | -3.724805               | -2.415944 | -0.088041 |
| 31               | 1                | 0              | -2.110132               | -1.592763 | 1.071155  |
| 32               | 6                | 0              | -4.924546               | -2.154644 | -0.748643 |
| 33               | 1                | 0              | -6.368624               | -0.650166 | -1.270651 |
| 34               | 1                | 0              | -3.319974               | -3.421795 | -0.077660 |
| 35               | 1                | 0              | -5.452699               | -2.954901 | -1.254709 |

## Structure 14j (DMSO)

Energy (Hartrees): -953.072251941  
No imaginary frequencies

Standard orientation:

| Center<br>Number | Atomic<br>Number | Atomic<br>Type | Coordinates (Angstroms) |           |           |
|------------------|------------------|----------------|-------------------------|-----------|-----------|
|                  |                  |                | X                       | Y         | Z         |
| 1                | 6                | 0              | 1.932100                | -1.250415 | -0.493760 |
| 2                | 6                | 0              | 0.993665                | -0.230536 | -0.473719 |
| 3                | 6                | 0              | 1.333632                | 1.046482  | -0.009003 |
| 4                | 6                | 0              | 2.636069                | 1.281901  | 0.445734  |
| 5                | 6                | 0              | 3.587173                | 0.273025  | 0.434421  |
| 6                | 6                | 0              | 3.214844                | -0.977988 | -0.036984 |
| 7                | 1                | 0              | 1.676522                | -2.236154 | -0.858922 |
| 8                | 1                | 0              | -0.011037               | -0.423229 | -0.827686 |
| 9                | 1                | 0              | 2.906063                | 2.262109  | 0.818701  |
| 10               | 1                | 0              | 4.593462                | 0.449679  | 0.790049  |
| 11               | 6                | 0              | 0.331086                | 2.135901  | -0.001195 |
| 12               | 6                | 0              | 0.593475                | 3.363103  | -0.489987 |
| 13               | 1                | 0              | -0.167922               | 4.138900  | -0.474462 |
| 14               | 6                | 0              | -1.016233               | 1.929760  | 0.536915  |
| 15               | 1                | 0              | -1.684544               | 2.798278  | 0.465679  |
| 16               | 7                | 0              | -1.403240               | 0.839163  | 1.061659  |
| 17               | 8                | 0              | 1.775017                | 3.692655  | -1.034579 |
| 18               | 1                | 0              | 1.746304                | 4.603944  | -1.351752 |
| 19               | 7                | 0              | 4.215979                | -2.053506 | -0.052766 |
| 20               | 8                | 0              | 5.349115                | -1.785457 | 0.296798  |
| 21               | 8                | 0              | 3.862908                | -3.158982 | -0.414978 |
| 22               | 6                | 0              | -2.787204               | 0.781897  | 1.525234  |
| 23               | 1                | 0              | -3.262572               | 1.770608  | 1.501985  |
| 24               | 1                | 0              | -2.784439               | 0.419193  | 2.556291  |
| 25               | 6                | 0              | -3.568532               | -0.179214 | 0.656852  |
| 26               | 6                | 0              | -4.215508               | 0.285764  | -0.488953 |
| 27               | 6                | 0              | -3.608380               | -1.542503 | 0.951499  |
| 28               | 6                | 0              | -4.896205               | -0.594952 | -1.324794 |
| 29               | 1                | 0              | -4.187458               | 1.345830  | -0.724063 |
| 30               | 6                | 0              | -4.285965               | -2.427097 | 0.116105  |
| 31               | 1                | 0              | -3.108367               | -1.910693 | 1.842212  |
| 32               | 6                | 0              | -4.931845               | -1.954615 | -1.023744 |
| 33               | 1                | 0              | -5.399766               | -0.220739 | -2.209319 |
| 34               | 1                | 0              | -4.311924               | -3.484324 | 0.356256  |
| 35               | 1                | 0              | -5.462845               | -2.641787 | -1.672880 |

## Structure 14j (C<sub>2</sub>H<sub>5</sub>OH)

Energy (Hartrees): -953.077139267

No imaginary frequencies

Standard orientation:

| Center<br>Number | Atomic<br>Number | Atomic<br>Type | Coordinates (Angstroms) |           |           |
|------------------|------------------|----------------|-------------------------|-----------|-----------|
|                  |                  |                | X                       | Y         | Z         |
| 1                | 6                | 0              | 1.897828                | -1.269785 | -0.518485 |
| 2                | 6                | 0              | 0.999054                | -0.215668 | -0.510240 |
| 3                | 6                | 0              | 1.367097                | 1.036165  | -0.000248 |
| 4                | 6                | 0              | 2.656294                | 1.210446  | 0.516178  |
| 5                | 6                | 0              | 3.566976                | 0.165175  | 0.523320  |
| 6                | 6                | 0              | 3.168381                | -1.058058 | 0.002286  |
| 7                | 1                | 0              | 1.620171                | -2.235773 | -0.918862 |
| 8                | 1                | 0              | 0.003144                | -0.360702 | -0.910008 |
| 9                | 1                | 0              | 2.946684                | 2.171124  | 0.923815  |
| 10               | 1                | 0              | 4.562118                | 0.294504  | 0.927637  |
| 11               | 6                | 0              | 0.406191                | 2.162273  | -0.018026 |
| 12               | 6                | 0              | 0.732590                | 3.378261  | -0.497358 |
| 13               | 1                | 0              | 0.004972                | 4.185553  | -0.513983 |
| 14               | 6                | 0              | -0.964958               | 2.001105  | 0.470057  |
| 15               | 1                | 0              | -1.610449               | 2.880428  | 0.343015  |
| 16               | 7                | 0              | -1.395844               | 0.936664  | 1.015330  |
| 17               | 8                | 0              | 1.945653                | 3.659645  | -0.996689 |
| 18               | 1                | 0              | 1.971377                | 4.569394  | -1.318106 |
| 19               | 7                | 0              | 4.124953                | -2.167907 | 0.002488  |
| 20               | 8                | 0              | 5.221899                | -1.984824 | 0.495369  |
| 21               | 8                | 0              | 3.782648                | -3.225726 | -0.490877 |
| 22               | 6                | 0              | -2.797867               | 0.919500  | 1.415611  |
| 23               | 1                | 0              | -3.258042               | 1.911491  | 1.310601  |
| 24               | 1                | 0              | -2.853697               | 0.627888  | 2.467285  |
| 25               | 6                | 0              | -3.566624               | -0.085618 | 0.584317  |
| 26               | 6                | 0              | -3.678153               | 0.099049  | -0.796299 |
| 27               | 6                | 0              | -4.161467               | -1.203570 | 1.165936  |
| 28               | 6                | 0              | -4.376342               | -0.813392 | -1.579024 |
| 29               | 1                | 0              | -3.213354               | 0.965228  | -1.259050 |
| 30               | 6                | 0              | -4.862305               | -2.121200 | 0.384253  |
| 31               | 1                | 0              | -4.075994               | -1.358352 | 2.237030  |
| 32               | 6                | 0              | -4.971297               | -1.928092 | -0.988837 |
| 33               | 1                | 0              | -4.458391               | -0.656530 | -2.649057 |
| 34               | 1                | 0              | -5.320431               | -2.986943 | 0.849837  |
| 35               | 1                | 0              | -5.515874               | -2.640926 | -1.597955 |

## Structure 14k (vacuum)

Energy (Hartrees): -953.044049711

No imaginary frequencies

Standard orientation:

| Center<br>Number | Atomic<br>Number | Atomic<br>Type | Coordinates (Angstroms) |           |           |
|------------------|------------------|----------------|-------------------------|-----------|-----------|
|                  |                  |                | X                       | Y         | Z         |
| 1                | 6                | 0              | 1.901969                | -1.160636 | -0.525081 |
| 2                | 6                | 0              | 0.997770                | -0.111901 | -0.537843 |
| 3                | 6                | 0              | 1.368537                | 1.158654  | -0.077271 |
| 4                | 6                | 0              | 2.661317                | 1.345914  | 0.422240  |
| 5                | 6                | 0              | 3.581117                | 0.306422  | 0.437759  |
| 6                | 6                | 0              | 3.182329                | -0.930582 | -0.039802 |
| 7                | 1                | 0              | 1.634079                | -2.144429 | -0.885762 |
| 8                | 1                | 0              | -0.005719               | -0.273576 | -0.908476 |
| 9                | 1                | 0              | 2.942930                | 2.310792  | 0.827188  |
| 10               | 1                | 0              | 4.582976                | 0.436385  | 0.823668  |
| 11               | 6                | 0              | 0.417017                | 2.291869  | -0.145685 |
| 12               | 6                | 0              | 0.840879                | 3.478425  | -0.608392 |
| 13               | 1                | 0              | 1.857923                | 3.614608  | -0.964839 |
| 14               | 6                | 0              | -0.989079               | 2.121305  | 0.253592  |
| 15               | 1                | 0              | -1.657070               | 2.961268  | 0.029461  |
| 16               | 7                | 0              | -1.397631               | 1.062945  | 0.816396  |
| 17               | 8                | 0              | 0.030813                | 4.562353  | -0.660325 |
| 18               | 1                | 0              | 0.458799                | 5.277855  | -1.135017 |
| 19               | 7                | 0              | 4.150831                | -2.043499 | -0.024799 |
| 20               | 8                | 0              | 5.266204                | -1.812253 | 0.391603  |
| 21               | 8                | 0              | 3.774017                | -3.121614 | -0.431470 |
| 22               | 6                | 0              | -2.810487               | 0.961372  | 1.133335  |
| 23               | 1                | 0              | -3.380141               | 1.842726  | 0.807568  |
| 24               | 1                | 0              | -2.896826               | 0.891085  | 2.223742  |
| 25               | 6                | 0              | -3.395320               | -0.291250 | 0.515232  |
| 26               | 6                | 0              | -4.625304               | -0.258976 | -0.135475 |
| 27               | 6                | 0              | -2.704327               | -1.501678 | 0.602985  |
| 28               | 6                | 0              | -5.166724               | -1.418946 | -0.684922 |
| 29               | 1                | 0              | -5.164597               | 0.679318  | -0.216618 |
| 30               | 6                | 0              | -3.242363               | -2.658785 | 0.053958  |
| 31               | 1                | 0              | -1.739929               | -1.522422 | 1.098395  |
| 32               | 6                | 0              | -4.476460               | -2.621226 | -0.591032 |
| 33               | 1                | 0              | -6.124827               | -1.379286 | -1.189907 |
| 34               | 1                | 0              | -2.699135               | -3.593770 | 0.128922  |
| 35               | 1                | 0              | -4.894363               | -3.524459 | -1.019543 |



## Structure 14k (CHCl<sub>3</sub>)

Energy (Hartrees): -953.073707763

No imaginary frequencies

Standard orientation:

| Center<br>Number | Atomic<br>Number | Atomic<br>Type | Coordinates (Angstroms) |           |           |
|------------------|------------------|----------------|-------------------------|-----------|-----------|
|                  |                  |                | X                       | Y         | Z         |
| 1                | 6                | 0              | 1.942461                | -1.175121 | -0.509430 |
| 2                | 6                | 0              | 1.014409                | -0.147555 | -0.510756 |
| 3                | 6                | 0              | 1.364261                | 1.138349  | -0.073363 |
| 4                | 6                | 0              | 2.667509                | 1.363238  | 0.387176  |
| 5                | 6                | 0              | 3.612082                | 0.347534  | 0.388295  |
| 6                | 6                | 0              | 3.230429                | -0.907104 | -0.062147 |
| 7                | 1                | 0              | 1.679054                | -2.166142 | -0.854070 |
| 8                | 1                | 0              | 0.008629                | -0.340566 | -0.860296 |
| 9                | 1                | 0              | 2.940729                | 2.340128  | 0.768452  |
| 10               | 1                | 0              | 4.619211                | 0.517184  | 0.744991  |
| 11               | 6                | 0              | 0.383009                | 2.246414  | -0.121784 |
| 12               | 6                | 0              | 0.775515                | 3.449752  | -0.580241 |
| 13               | 1                | 0              | 1.782868                | 3.616176  | -0.950778 |
| 14               | 6                | 0              | -1.009437               | 2.048776  | 0.303511  |
| 15               | 1                | 0              | -1.698720               | 2.871885  | 0.083990  |
| 16               | 7                | 0              | -1.396800               | 0.994544  | 0.894699  |
| 17               | 8                | 0              | -0.055350               | 4.509437  | -0.615893 |
| 18               | 1                | 0              | 0.374766                | 5.254904  | -1.050270 |
| 19               | 7                | 0              | 4.222874                | -1.990034 | -0.062345 |
| 20               | 8                | 0              | 5.357639                | -1.725187 | 0.282529  |
| 21               | 8                | 0              | 3.861353                | -3.096549 | -0.409928 |
| 22               | 6                | 0              | -2.808987               | 0.900213  | 1.240870  |
| 23               | 1                | 0              | -3.364701               | 1.804800  | 0.963125  |
| 24               | 1                | 0              | -2.873917               | 0.777766  | 2.326720  |
| 25               | 6                | 0              | -3.421832               | -0.308856 | 0.568146  |
| 26               | 6                | 0              | -4.386082               | -0.160787 | -0.426716 |
| 27               | 6                | 0              | -3.001402               | -1.593920 | 0.920199  |
| 28               | 6                | 0              | -4.933611               | -1.278539 | -1.054669 |
| 29               | 1                | 0              | -4.713651               | 0.834193  | -0.711238 |
| 30               | 6                | 0              | -3.542836               | -2.710032 | 0.293528  |
| 31               | 1                | 0              | -2.244445               | -1.713143 | 1.689031  |
| 32               | 6                | 0              | -4.512840               | -2.554402 | -0.696174 |
| 33               | 1                | 0              | -5.687236               | -1.150353 | -1.823727 |
| 34               | 1                | 0              | -3.211983               | -3.702749 | 0.577630  |
| 35               | 1                | 0              | -4.938145               | -3.425013 | -1.182375 |

## Structure 14k (DMSO)

Energy (Hartrees): -953.070855638

No imaginary frequencies

Standard orientation:

| Center<br>Number | Atomic<br>Number | Atomic<br>Type | Coordinates (Angstroms) |           |           |
|------------------|------------------|----------------|-------------------------|-----------|-----------|
|                  |                  |                | X                       | Y         | Z         |
| 1                | 6                | 0              | 1.945804                | -1.179771 | -0.501983 |
| 2                | 6                | 0              | 1.010868                | -0.158321 | -0.503384 |
| 3                | 6                | 0              | 1.355567                | 1.133461  | -0.077798 |
| 4                | 6                | 0              | 2.662082                | 1.370894  | 0.368005  |
| 5                | 6                | 0              | 3.613085                | 0.361359  | 0.369299  |
| 6                | 6                | 0              | 3.235417                | -0.900501 | -0.065401 |
| 7                | 1                | 0              | 1.684214                | -2.173675 | -0.839869 |
| 8                | 1                | 0              | 0.005652                | -0.360408 | -0.850450 |
| 9                | 1                | 0              | 2.935239                | 2.354241  | 0.732680  |
| 10               | 1                | 0              | 4.621439                | 0.545606  | 0.715261  |
| 11               | 6                | 0              | 0.367717                | 2.234917  | -0.122412 |
| 12               | 6                | 0              | 0.757983                | 3.443745  | -0.571584 |
| 13               | 1                | 0              | 1.766840                | 3.616488  | -0.935466 |
| 14               | 6                | 0              | -1.021625               | 2.031732  | 0.306505  |
| 15               | 1                | 0              | -1.719157               | 2.844741  | 0.078161  |
| 16               | 7                | 0              | -1.401995               | 0.984226  | 0.916435  |
| 17               | 8                | 0              | -0.075102               | 4.499321  | -0.600968 |
| 18               | 1                | 0              | 0.363190                | 5.251129  | -1.018031 |
| 19               | 7                | 0              | 4.231898                | -1.978457 | -0.060497 |
| 20               | 8                | 0              | 5.367607                | -1.707218 | 0.279164  |
| 21               | 8                | 0              | 3.874124                | -3.090602 | -0.397812 |
| 22               | 6                | 0              | -2.815573               | 0.890624  | 1.265792  |
| 23               | 1                | 0              | -3.367771               | 1.797636  | 0.991585  |
| 24               | 1                | 0              | -2.880616               | 0.758341  | 2.350139  |
| 25               | 6                | 0              | -3.425915               | -0.311853 | 0.580400  |
| 26               | 6                | 0              | -4.311618               | -0.151273 | -0.483769 |
| 27               | 6                | 0              | -3.074365               | -1.603161 | 0.982194  |
| 28               | 6                | 0              | -4.844756               | -1.262466 | -1.135303 |
| 29               | 1                | 0              | -4.587666               | 0.848916  | -0.803109 |
| 30               | 6                | 0              | -3.601216               | -2.713616 | 0.331724  |
| 31               | 1                | 0              | -2.383170               | -1.733707 | 1.809357  |
| 32               | 6                | 0              | -4.489473               | -2.545054 | -0.729870 |
| 33               | 1                | 0              | -5.537791               | -1.124521 | -1.957799 |
| 34               | 1                | 0              | -3.322731               | -3.711115 | 0.653262  |
| 35               | 1                | 0              | -4.903928               | -3.410354 | -1.234842 |

## Structure 14k (C<sub>2</sub>H<sub>5</sub>OH)

Energy (Hartrees): -953.075477634

No imaginary frequencies

Standard orientation:

| Center<br>Number | Atomic<br>Number | Atomic<br>Type | Coordinates (Angstroms) |           |           |
|------------------|------------------|----------------|-------------------------|-----------|-----------|
|                  |                  |                | X                       | Y         | Z         |
| 1                | 6                | 0              | 1.933972                | -1.210867 | -0.489036 |
| 2                | 6                | 0              | 1.013792                | -0.176949 | -0.494714 |
| 3                | 6                | 0              | 1.369669                | 1.106621  | -0.053091 |
| 4                | 6                | 0              | 2.673378                | 1.324224  | 0.411361  |
| 5                | 6                | 0              | 3.611369                | 0.303286  | 0.415465  |
| 6                | 6                | 0              | 3.221488                | -0.950308 | -0.033479 |
| 7                | 1                | 0              | 1.663637                | -2.198258 | -0.839435 |
| 8                | 1                | 0              | 0.010474                | -0.361115 | -0.857729 |
| 9                | 1                | 0              | 2.953278                | 2.300331  | 0.790098  |
| 10               | 1                | 0              | 4.617213                | 0.470403  | 0.777601  |
| 11               | 6                | 0              | 0.394514                | 2.218506  | -0.101124 |
| 12               | 6                | 0              | 0.799542                | 3.423082  | -0.550661 |
| 13               | 1                | 0              | 1.810768                | 3.588703  | -0.910665 |
| 14               | 6                | 0              | -0.999484               | 2.028891  | 0.317645  |
| 15               | 1                | 0              | -1.691138               | 2.839237  | 0.062051  |
| 16               | 7                | 0              | -1.392866               | 0.998113  | 0.949719  |
| 17               | 8                | 0              | -0.021158               | 4.487923  | -0.587415 |
| 18               | 1                | 0              | 0.424729                | 5.236620  | -1.002204 |
| 19               | 7                | 0              | 4.201418                | -2.036751 | -0.022378 |
| 20               | 8                | 0              | 5.350052                | -1.775051 | 0.282320  |
| 21               | 8                | 0              | 3.828292                | -3.155885 | -0.320469 |
| 22               | 6                | 0              | -2.814299               | 0.918323  | 1.268814  |
| 23               | 1                | 0              | -3.342412               | 1.840011  | 0.992768  |
| 24               | 1                | 0              | -2.913781               | 0.772303  | 2.347336  |
| 25               | 6                | 0              | -3.430450               | -0.261742 | 0.549630  |
| 26               | 6                | 0              | -3.670592               | -0.186054 | -0.824357 |
| 27               | 6                | 0              | -3.730425               | -1.443565 | 1.224880  |
| 28               | 6                | 0              | -4.207111               | -1.270687 | -1.509871 |
| 29               | 1                | 0              | -3.436095               | 0.731158  | -1.357780 |
| 30               | 6                | 0              | -4.267177               | -2.533119 | 0.541233  |
| 31               | 1                | 0              | -3.543610               | -1.511071 | 2.292114  |
| 32               | 6                | 0              | -4.506627               | -2.448657 | -0.826832 |
| 33               | 1                | 0              | -4.394710               | -1.198613 | -2.575601 |
| 34               | 1                | 0              | -4.498294               | -3.446320 | 1.078657  |
| 35               | 1                | 0              | -4.926766               | -3.294724 | -1.359265 |

## Structure 14l (vacuum)

Energy (Hartrees): -953.041634846

No imaginary frequencies

Standard orientation:

| Center<br>Number | Atomic<br>Number | Atomic<br>Type | Coordinates (Angstroms) |           |           |
|------------------|------------------|----------------|-------------------------|-----------|-----------|
|                  |                  |                | X                       | Y         | Z         |
| 1                | 6                | 0              | 2.543646                | -0.674185 | -1.147765 |
| 2                | 6                | 0              | 1.565802                | 0.306224  | -1.115257 |
| 3                | 6                | 0              | 1.415976                | 1.131344  | 0.006430  |
| 4                | 6                | 0              | 2.256604                | 0.935166  | 1.107033  |
| 5                | 6                | 0              | 3.244781                | -0.039523 | 1.089177  |
| 6                | 6                | 0              | 3.369181                | -0.827344 | -0.042517 |
| 7                | 1                | 0              | 2.678378                | -1.313882 | -2.009215 |
| 8                | 1                | 0              | 0.910256                | 0.437575  | -1.964946 |
| 9                | 1                | 0              | 2.120386                | 1.538176  | 1.996941  |
| 10               | 1                | 0              | 3.900012                | -0.203123 | 1.933752  |
| 11               | 6                | 0              | 0.400969                | 2.213208  | 0.027395  |
| 12               | 6                | 0              | 0.776022                | 3.432407  | 0.464184  |
| 13               | 1                | 0              | 1.804514                | 3.629648  | 0.743962  |
| 14               | 6                | 0              | -0.971134               | 1.947430  | -0.418017 |
| 15               | 1                | 0              | -1.668281               | 2.800930  | -0.435266 |
| 16               | 7                | 0              | -1.374929               | 0.802402  | -0.775304 |
| 17               | 8                | 0              | 0.023933                | 4.537849  | 0.604677  |
| 18               | 1                | 0              | -0.901822               | 4.362006  | 0.412917  |
| 19               | 7                | 0              | 4.412209                | -1.871509 | -0.070956 |
| 20               | 8                | 0              | 5.125540                | -1.978964 | 0.903477  |
| 21               | 8                | 0              | 4.492619                | -2.556970 | -1.067402 |
| 22               | 6                | 0              | -2.756849               | 0.664037  | -1.186540 |
| 23               | 1                | 0              | -2.755609               | 0.384304  | -2.246804 |
| 24               | 1                | 0              | -3.313828               | 1.608839  | -1.098436 |
| 25               | 6                | 0              | -3.476552               | -0.420205 | -0.408637 |
| 26               | 6                | 0              | -2.780777               | -1.443251 | 0.232536  |
| 27               | 6                | 0              | -4.870481               | -0.411735 | -0.360054 |
| 28               | 6                | 0              | -3.473331               | -2.444461 | 0.907441  |
| 29               | 1                | 0              | -1.698122               | -1.446315 | 0.202690  |
| 30               | 6                | 0              | -5.561881               | -1.413429 | 0.311397  |
| 31               | 1                | 0              | -5.419634               | 0.386035  | -0.850789 |
| 32               | 6                | 0              | -4.863180               | -2.434563 | 0.948289  |
| 33               | 1                | 0              | -2.922510               | -3.234434 | 1.404529  |
| 34               | 1                | 0              | -6.644951               | -1.393689 | 0.342031  |
| 35               | 1                | 0              | -5.399258               | -3.214373 | 1.475868  |

## Structure 14l (CHCl<sub>3</sub>)

Energy (Hartrees): -953.070519880

No imaginary frequencies

Standard orientation:

| Center<br>Number | Atomic<br>Number | Atomic<br>Type | Coordinates (Angstroms) |           |           |
|------------------|------------------|----------------|-------------------------|-----------|-----------|
|                  |                  |                | X                       | Y         | Z         |
| 1                | 6                | 0              | 2.613781                | -0.747425 | -1.056870 |
| 2                | 6                | 0              | 1.592016                | 0.186060  | -1.108022 |
| 3                | 6                | 0              | 1.383908                | 1.081525  | -0.049713 |
| 4                | 6                | 0              | 2.215119                | 1.001125  | 1.074447  |
| 5                | 6                | 0              | 3.247781                | 0.077762  | 1.139894  |
| 6                | 6                | 0              | 3.427858                | -0.783392 | 0.068445  |
| 7                | 1                | 0              | 2.785885                | -1.434737 | -1.874279 |
| 8                | 1                | 0              | 0.953675                | 0.227821  | -1.980180 |
| 9                | 1                | 0              | 2.040826                | 1.659005  | 1.917595  |
| 10               | 1                | 0              | 3.889704                | 0.015570  | 2.008341  |
| 11               | 6                | 0              | 0.331812                | 2.125021  | -0.121287 |
| 12               | 6                | 0              | 0.654187                | 3.370020  | 0.291833  |
| 13               | 1                | 0              | 1.662320                | 3.602800  | 0.618174  |
| 14               | 6                | 0              | -1.008069               | 1.809678  | -0.629592 |
| 15               | 1                | 0              | -1.707087               | 2.649354  | -0.752021 |
| 16               | 7                | 0              | -1.380965               | 0.633596  | -0.927478 |
| 17               | 8                | 0              | -0.125991               | 4.459465  | 0.351541  |
| 18               | 1                | 0              | -1.040780               | 4.268971  | 0.108778  |
| 19               | 7                | 0              | 4.515238                | -1.769730 | 0.126176  |
| 20               | 8                | 0              | 5.216508                | -1.788430 | 1.118099  |
| 21               | 8                | 0              | 4.662062                | -2.515689 | -0.821456 |
| 22               | 6                | 0              | -2.743218               | 0.465493  | -1.420592 |
| 23               | 1                | 0              | -2.681375               | 0.038797  | -2.425533 |
| 24               | 1                | 0              | -3.272270               | 1.425951  | -1.486300 |
| 25               | 6                | 0              | -3.507210               | -0.483400 | -0.524730 |
| 26               | 6                | 0              | -3.575533               | -1.845240 | -0.815005 |
| 27               | 6                | 0              | -4.123331               | -0.005368 | 0.632028  |
| 28               | 6                | 0              | -4.251500               | -2.716259 | 0.035058  |
| 29               | 1                | 0              | -3.096804               | -2.224526 | -1.712273 |
| 30               | 6                | 0              | -4.800574               | -0.871990 | 1.483654  |
| 31               | 1                | 0              | -4.073280               | 1.054298  | 0.865425  |
| 32               | 6                | 0              | -4.865533               | -2.230935 | 1.185821  |
| 33               | 1                | 0              | -4.298974               | -3.773191 | -0.202021 |
| 34               | 1                | 0              | -5.277624               | -0.487912 | 2.378313  |
| 35               | 1                | 0              | -5.393717               | -2.908070 | 1.847401  |

## Structure 14l (DMSO)

Energy (Hartrees): -953.069171902

No imaginary frequencies

Standard orientation:

| Center<br>Number | Atomic<br>Number | Atomic<br>Type | Coordinates (Angstroms) |           |           |
|------------------|------------------|----------------|-------------------------|-----------|-----------|
|                  |                  |                | X                       | Y         | Z         |
| 1                | 6                | 0              | 2.709674                | -0.649689 | -1.118416 |
| 2                | 6                | 0              | 1.694840                | 0.290530  | -1.169927 |
| 3                | 6                | 0              | 1.398927                | 1.090361  | -0.056829 |
| 4                | 6                | 0              | 2.137267                | 0.915657  | 1.118605  |
| 5                | 6                | 0              | 3.161018                | -0.019086 | 1.187342  |
| 6                | 6                | 0              | 3.426537                | -0.787742 | 0.064478  |
| 7                | 1                | 0              | 2.949344                | -1.260847 | -1.978437 |
| 8                | 1                | 0              | 1.134225                | 0.416547  | -2.087498 |
| 9                | 1                | 0              | 1.899540                | 1.506996  | 1.995255  |
| 10               | 1                | 0              | 3.729295                | -0.157022 | 2.097530  |
| 11               | 6                | 0              | 0.338163                | 2.124397  | -0.131307 |
| 12               | 6                | 0              | 0.625538                | 3.361638  | 0.325447  |
| 13               | 1                | 0              | 1.615250                | 3.598138  | 0.702457  |
| 14               | 6                | 0              | -0.980593               | 1.789815  | -0.679823 |
| 15               | 1                | 0              | -1.678390               | 2.617207  | -0.865222 |
| 16               | 7                | 0              | -1.334564               | 0.596749  | -0.936881 |
| 17               | 8                | 0              | -0.178137               | 4.433816  | 0.376857  |
| 18               | 1                | 0              | -1.073754               | 4.227031  | 0.077450  |
| 19               | 7                | 0              | 4.500309                | -1.787831 | 0.127398  |
| 20               | 8                | 0              | 5.145269                | -1.871775 | 1.154630  |
| 21               | 8                | 0              | 4.692034                | -2.484005 | -0.850722 |
| 22               | 6                | 0              | -2.680713               | 0.395094  | -1.460433 |
| 23               | 1                | 0              | -2.595165               | -0.091623 | -2.435575 |
| 24               | 1                | 0              | -3.206465               | 1.349705  | -1.596342 |
| 25               | 6                | 0              | -3.470519               | -0.499661 | -0.530244 |
| 26               | 6                | 0              | -3.863246               | -1.778665 | -0.920318 |
| 27               | 6                | 0              | -3.804271               | -0.048145 | 0.748740  |
| 28               | 6                | 0              | -4.583130               | -2.595204 | -0.049388 |
| 29               | 1                | 0              | -3.604565               | -2.137841 | -1.911309 |
| 30               | 6                | 0              | -4.522760               | -0.859593 | 1.620026  |
| 31               | 1                | 0              | -3.498245               | 0.946418  | 1.060683  |
| 32               | 6                | 0              | -4.914275               | -2.137359 | 1.221584  |
| 33               | 1                | 0              | -4.884025               | -3.587983 | -0.365035 |
| 34               | 1                | 0              | -4.779993               | -0.497186 | 2.609155  |
| 35               | 1                | 0              | -5.475330               | -2.770352 | 1.899905  |

## Structure 14l (C<sub>2</sub>H<sub>5</sub>OH)

Energy (Hartrees): -953.072899211

No imaginary frequencies

Standard orientation:

| Center<br>Number | Atomic<br>Number | Atomic<br>Type | Coordinates (Angstroms) |           |           |
|------------------|------------------|----------------|-------------------------|-----------|-----------|
|                  |                  |                | X                       | Y         | Z         |
| 1                | 6                | 0              | 2.716663                | -0.590483 | -1.119023 |
| 2                | 6                | 0              | 1.693066                | 0.339954  | -1.160717 |
| 3                | 6                | 0              | 1.371399                | 1.106506  | -0.031343 |
| 4                | 6                | 0              | 2.093145                | 0.907866  | 1.150919  |
| 5                | 6                | 0              | 3.122004                | -0.021134 | 1.212897  |
| 6                | 6                | 0              | 3.413317                | -0.755553 | 0.072989  |
| 7                | 1                | 0              | 2.974963                | -1.175341 | -1.991959 |
| 8                | 1                | 0              | 1.145038                | 0.485335  | -2.082985 |
| 9                | 1                | 0              | 1.838099                | 1.476194  | 2.037910  |
| 10               | 1                | 0              | 3.676909                | -0.178244 | 2.128334  |
| 11               | 6                | 0              | 0.302385                | 2.133334  | -0.096571 |
| 12               | 6                | 0              | 0.590620                | 3.366057  | 0.372542  |
| 13               | 1                | 0              | 1.579195                | 3.592890  | 0.758972  |
| 14               | 6                | 0              | -1.012569               | 1.794585  | -0.652100 |
| 15               | 1                | 0              | -1.725557               | 2.616990  | -0.790611 |
| 16               | 7                | 0              | -1.344849               | 0.605920  | -0.957112 |
| 17               | 8                | 0              | -0.202585               | 4.447374  | 0.427986  |
| 18               | 1                | 0              | -1.097081               | 4.270432  | 0.109616  |
| 19               | 7                | 0              | 4.491477                | -1.745388 | 0.127060  |
| 20               | 8                | 0              | 5.045388                | -1.939625 | 1.192645  |
| 21               | 8                | 0              | 4.789118                | -2.331036 | -0.896697 |
| 22               | 6                | 0              | -2.693704               | 0.405459  | -1.479426 |
| 23               | 1                | 0              | -2.605300               | -0.053990 | -2.467544 |
| 24               | 1                | 0              | -3.230581               | 1.356596  | -1.586969 |
| 25               | 6                | 0              | -3.463936               | -0.522087 | -0.567031 |
| 26               | 6                | 0              | -3.551608               | -1.887548 | -0.836025 |
| 27               | 6                | 0              | -4.063465               | -0.018921 | 0.589033  |
| 28               | 6                | 0              | -4.229556               | -2.738053 | 0.034547  |
| 29               | 1                | 0              | -3.088175               | -2.286532 | -1.733086 |
| 30               | 6                | 0              | -4.743180               | -0.864761 | 1.459775  |
| 31               | 1                | 0              | -3.997426               | 1.043685  | 0.805578  |
| 32               | 6                | 0              | -4.827126               | -2.228099 | 1.183569  |
| 33               | 1                | 0              | -4.291579               | -3.798118 | -0.185848 |
| 34               | 1                | 0              | -5.207871               | -0.461271 | 2.352710  |
| 35               | 1                | 0              | -5.357144               | -2.888798 | 1.860584  |

## Structure 26a (vacuum)

Energy (Hartrees): -823.79115479

No imaginary frequencies

Standard orientation:

| Center<br>Number | Atomic<br>Number | Atomic<br>Type | Coordinates (Angstroms) |           |           |
|------------------|------------------|----------------|-------------------------|-----------|-----------|
|                  |                  |                | X                       | Y         | Z         |
| 1                | 6                | 0              | -2.593797               | 1.022985  | 0.582554  |
| 2                | 6                | 0              | -3.870691               | 0.467398  | 0.637988  |
| 3                | 6                | 0              | -4.137339               | -0.712485 | -0.052692 |
| 4                | 6                | 0              | -3.123947               | -1.315458 | -0.801696 |
| 5                | 6                | 0              | -1.867945               | -0.740289 | -0.860589 |
| 6                | 6                | 0              | -1.569706               | 0.438199  | -0.160722 |
| 7                | 1                | 0              | -2.392005               | 1.922758  | 1.154003  |
| 8                | 1                | 0              | -4.633272               | 0.955208  | 1.229949  |
| 9                | 1                | 0              | -3.355805               | -2.223372 | -1.344947 |
| 10               | 1                | 0              | -1.104253               | -1.197372 | -1.481076 |
| 11               | 6                | 0              | -0.220267               | 1.045426  | -0.209624 |
| 12               | 6                | 0              | 0.898096                | 0.266240  | -0.067191 |
| 13               | 6                | 0              | -0.091152               | 2.476753  | -0.411128 |
| 14               | 1                | 0              | 0.777852                | -0.797144 | 0.114691  |
| 15               | 1                | 0              | -1.039436               | 3.021975  | -0.565593 |
| 16               | 8                | 0              | 0.966570                | 3.093055  | -0.432646 |
| 17               | 7                | 0              | 2.167113                | 0.715415  | -0.101121 |
| 18               | 1                | 0              | 2.264752                | 1.724713  | -0.196694 |
| 19               | 6                | 0              | 3.326438                | -0.063830 | 0.032363  |
| 20               | 6                | 0              | 4.517245                | 0.584884  | 0.370709  |
| 21               | 6                | 0              | 3.333042                | -1.444150 | -0.178979 |
| 22               | 6                | 0              | 5.692252                | -0.138831 | 0.508045  |
| 23               | 1                | 0              | 4.509301                | 1.657101  | 0.532753  |
| 24               | 6                | 0              | 4.514187                | -2.160310 | -0.025504 |
| 25               | 1                | 0              | 2.433036                | -1.961936 | -0.485032 |
| 26               | 6                | 0              | 5.698205                | -1.517717 | 0.318058  |
| 27               | 1                | 0              | 6.607003                | 0.378799  | 0.770978  |
| 28               | 1                | 0              | 4.507181                | -3.230891 | -0.192384 |
| 29               | 1                | 0              | 6.615472                | -2.081990 | 0.429055  |
| 30               | 8                | 0              | -5.340824               | -1.343037 | -0.063614 |
| 31               | 6                | 0              | -6.393589               | -0.759662 | 0.674298  |
| 32               | 1                | 0              | -7.256810               | -1.405662 | 0.530689  |
| 33               | 1                | 0              | -6.149708               | -0.709935 | 1.740339  |
| 34               | 1                | 0              | -6.625256               | 0.244778  | 0.305847  |



## Structure 26a (CHCl<sub>3</sub>)

Energy (Hartrees): -823.81550574

No imaginary frequencies

Standard orientation:

| Center<br>Number | Atomic<br>Number | Atomic<br>Type | Coordinates (Angstroms) |           |           |
|------------------|------------------|----------------|-------------------------|-----------|-----------|
|                  |                  |                | X                       | Y         | Z         |
| 1                | 6                | 0              | -2.615119               | 1.043098  | 0.545661  |
| 2                | 6                | 0              | -3.893359               | 0.488460  | 0.594960  |
| 3                | 6                | 0              | -4.142998               | -0.722892 | -0.047477 |
| 4                | 6                | 0              | -3.109742               | -1.359026 | -0.742012 |
| 5                | 6                | 0              | -1.851691               | -0.785012 | -0.796759 |
| 6                | 6                | 0              | -1.571523               | 0.426494  | -0.146264 |
| 7                | 1                | 0              | -2.430696               | 1.969669  | 1.079635  |
| 8                | 1                | 0              | -4.671791               | 1.001526  | 1.144289  |
| 9                | 1                | 0              | -3.321056               | -2.293169 | -1.249847 |
| 10               | 1                | 0              | -1.072528               | -1.275789 | -1.370985 |
| 11               | 6                | 0              | -0.221904               | 1.037515  | -0.193586 |
| 12               | 6                | 0              | 0.900370                | 0.254980  | -0.057941 |
| 13               | 6                | 0              | -0.102060               | 2.463632  | -0.393721 |
| 14               | 1                | 0              | 0.781401                | -0.810949 | 0.109188  |
| 15               | 1                | 0              | -1.048863               | 3.005695  | -0.558338 |
| 16               | 8                | 0              | 0.955497                | 3.091755  | -0.409251 |
| 17               | 7                | 0              | 2.165363                | 0.705019  | -0.089262 |
| 18               | 1                | 0              | 2.271762                | 1.713719  | -0.179680 |
| 19               | 6                | 0              | 3.332260                | -0.068261 | 0.036031  |
| 20               | 6                | 0              | 4.525419                | 0.602432  | 0.320771  |
| 21               | 6                | 0              | 3.342843                | -1.454982 | -0.131177 |
| 22               | 6                | 0              | 5.712004                | -0.106363 | 0.444710  |
| 23               | 1                | 0              | 4.510578                | 1.679687  | 0.449059  |
| 24               | 6                | 0              | 4.536933                | -2.154654 | 0.005532  |
| 25               | 1                | 0              | 2.437872                | -1.992974 | -0.384067 |
| 26               | 6                | 0              | 5.725447                | -1.490703 | 0.292823  |
| 27               | 1                | 0              | 6.629234                | 0.427414  | 0.665541  |
| 28               | 1                | 0              | 4.534846                | -3.230404 | -0.128055 |
| 29               | 1                | 0              | 6.651812                | -2.043516 | 0.391594  |
| 30               | 8                | 0              | -5.346187               | -1.353372 | -0.055510 |
| 31               | 6                | 0              | -6.426285               | -0.720029 | 0.610195  |
| 32               | 1                | 0              | -7.289104               | -1.367742 | 0.467136  |
| 33               | 1                | 0              | -6.224657               | -0.616118 | 1.680674  |
| 34               | 1                | 0              | -6.634417               | 0.262632  | 0.176306  |

## Structure 26a (DMSO)

Energy (Hartrees): -823.81330327

No imaginary frequencies

Standard orientation:

| Center<br>Number | Atomic<br>Number | Atomic<br>Type | Coordinates (Angstroms) |           |           |
|------------------|------------------|----------------|-------------------------|-----------|-----------|
|                  |                  |                | X                       | Y         | Z         |
| 1                | 6                | 0              | -2.623443               | 1.057509  | 0.518177  |
| 2                | 6                | 0              | -3.899568               | 0.497236  | 0.569172  |
| 3                | 6                | 0              | -4.137177               | -0.731529 | -0.045967 |
| 4                | 6                | 0              | -3.091853               | -1.377379 | -0.714788 |
| 5                | 6                | 0              | -1.835550               | -0.798656 | -0.771513 |
| 6                | 6                | 0              | -1.568652               | 0.430650  | -0.148377 |
| 7                | 1                | 0              | -2.451305               | 1.998415  | 1.030986  |
| 8                | 1                | 0              | -4.684644               | 1.020540  | 1.099535  |
| 9                | 1                | 0              | -3.287869               | -2.326727 | -1.200492 |
| 10               | 1                | 0              | -1.047948               | -1.303963 | -1.321435 |
| 11               | 6                | 0              | -0.221204               | 1.047107  | -0.192292 |
| 12               | 6                | 0              | 0.902080                | 0.265396  | -0.055452 |
| 13               | 6                | 0              | -0.108509               | 2.473581  | -0.394873 |
| 14               | 1                | 0              | 0.783702                | -0.802230 | 0.101598  |
| 15               | 1                | 0              | -1.057869               | 3.008510  | -0.567643 |
| 16               | 8                | 0              | 0.944556                | 3.109474  | -0.405262 |
| 17               | 7                | 0              | 2.167131                | 0.715316  | -0.077638 |
| 18               | 1                | 0              | 2.282975                | 1.723551  | -0.155107 |
| 19               | 6                | 0              | 3.330803                | -0.064503 | 0.039673  |
| 20               | 6                | 0              | 4.526795                | 0.598108  | 0.332548  |
| 21               | 6                | 0              | 3.333734                | -1.449530 | -0.143156 |
| 22               | 6                | 0              | 5.709912                | -0.118545 | 0.451133  |
| 23               | 1                | 0              | 4.516624                | 1.674264  | 0.471001  |
| 24               | 6                | 0              | 4.524602                | -2.156534 | -0.012461 |
| 25               | 1                | 0              | 2.425972                | -1.980106 | -0.401816 |
| 26               | 6                | 0              | 5.716403                | -1.501713 | 0.284425  |
| 27               | 1                | 0              | 6.629633                | 0.408270  | 0.678891  |
| 28               | 1                | 0              | 4.517001                | -3.230789 | -0.158280 |
| 29               | 1                | 0              | 6.639912                | -2.060517 | 0.378160  |
| 30               | 8                | 0              | -5.335394               | -1.368019 | -0.049202 |
| 31               | 6                | 0              | -6.420906               | -0.726723 | 0.604500  |
| 32               | 1                | 0              | -7.279642               | -1.382880 | 0.476774  |
| 33               | 1                | 0              | -6.219009               | -0.597207 | 1.671795  |
| 34               | 1                | 0              | -6.635543               | 0.245171  | 0.150721  |

## Structure 26a (C<sub>2</sub>H<sub>5</sub>OH)

Energy (Hartrees): -823.81571433

No imaginary frequencies

Standard orientation:

| Center<br>Number | Atomic<br>Number | Atomic<br>Type | Coordinates (Angstroms) |           |           |
|------------------|------------------|----------------|-------------------------|-----------|-----------|
|                  |                  |                | X                       | Y         | Z         |
| 1                | 6                | 0              | -2.620138               | 1.053266  | 0.532996  |
| 2                | 6                | 0              | -3.895592               | 0.491867  | 0.582373  |
| 3                | 6                | 0              | -4.131014               | -0.730858 | -0.043032 |
| 4                | 6                | 0              | -3.089429               | -1.372530 | -0.719194 |
| 5                | 6                | 0              | -1.833612               | -0.792145 | -0.774472 |
| 6                | 6                | 0              | -1.567646               | 0.432376  | -0.142536 |
| 7                | 1                | 0              | -2.446599               | 1.990014  | 1.052988  |
| 8                | 1                | 0              | -4.680904               | 1.009190  | 1.118219  |
| 9                | 1                | 0              | -3.288369               | -2.317830 | -1.212173 |
| 10               | 1                | 0              | -1.046806               | -1.291050 | -1.331445 |
| 11               | 6                | 0              | -0.221751               | 1.052731  | -0.191329 |
| 12               | 6                | 0              | 0.905416                | 0.271453  | -0.052628 |
| 13               | 6                | 0              | -0.113205               | 2.471373  | -0.399931 |
| 14               | 1                | 0              | 0.786333                | -0.794337 | 0.116613  |
| 15               | 1                | 0              | -1.060660               | 3.008680  | -0.568304 |
| 16               | 8                | 0              | 0.944783                | 3.110607  | -0.419424 |
| 17               | 7                | 0              | 2.167738                | 0.718421  | -0.085481 |
| 18               | 1                | 0              | 2.287555                | 1.725506  | -0.175408 |
| 19               | 6                | 0              | 3.331601                | -0.064460 | 0.036821  |
| 20               | 6                | 0              | 4.524667                | 0.595231  | 0.344061  |
| 21               | 6                | 0              | 3.333089                | -1.447146 | -0.158190 |
| 22               | 6                | 0              | 5.705879                | -0.124045 | 0.467035  |
| 23               | 1                | 0              | 4.514701                | 1.670361  | 0.490434  |
| 24               | 6                | 0              | 4.521534                | -2.157120 | -0.022447 |
| 25               | 1                | 0              | 2.426842                | -1.973644 | -0.430869 |
| 26               | 6                | 0              | 5.711267                | -1.505726 | 0.289950  |
| 27               | 1                | 0              | 6.624592                | 0.399711  | 0.705913  |
| 28               | 1                | 0              | 4.514267                | -3.230148 | -0.177478 |
| 29               | 1                | 0              | 6.633366                | -2.066505 | 0.387244  |
| 30               | 8                | 0              | -5.333889               | -1.370231 | -0.049461 |
| 31               | 6                | 0              | -6.424857               | -0.729758 | 0.599952  |
| 32               | 1                | 0              | -7.282266               | -1.385759 | 0.462195  |
| 33               | 1                | 0              | -6.227620               | -0.606517 | 1.668525  |
| 34               | 1                | 0              | -6.632998               | 0.243309  | 0.146416  |

## Structure 26b (vacuum)

Energy (Hartrees): -823.786478494

No imaginary frequencies

Standard orientation:

| Center<br>Number | Atomic<br>Number | Atomic<br>Type | Coordinates (Angstroms) |           |           |
|------------------|------------------|----------------|-------------------------|-----------|-----------|
|                  |                  |                | X                       | Y         | Z         |
| 1                | 6                | 0              | 2.389092                | 1.161342  | 0.972742  |
| 2                | 6                | 0              | 3.516408                | 0.362010  | 1.030014  |
| 3                | 6                | 0              | 3.672582                | -0.698634 | 0.133702  |
| 4                | 6                | 0              | 2.689131                | -0.941686 | -0.823711 |
| 5                | 6                | 0              | 1.564754                | -0.119782 | -0.874221 |
| 6                | 6                | 0              | 1.384975                | 0.936293  | 0.019120  |
| 7                | 1                | 0              | 2.272693                | 1.969618  | 1.686964  |
| 8                | 1                | 0              | 4.292226                | 0.531434  | 1.766675  |
| 9                | 1                | 0              | 2.789775                | -1.745367 | -1.540500 |
| 10               | 1                | 0              | 0.818904                | -0.294268 | -1.643551 |
| 11               | 6                | 0              | 0.185328                | 1.801219  | -0.048440 |
| 12               | 6                | 0              | -1.083231               | 1.318861  | -0.026207 |
| 13               | 6                | 0              | 0.342565                | 3.258474  | -0.141219 |
| 14               | 1                | 0              | -1.898229               | 2.031007  | -0.101166 |
| 15               | 1                | 0              | 1.394175                | 3.603640  | -0.190731 |
| 16               | 8                | 0              | -0.564184               | 4.061138  | -0.176532 |
| 17               | 8                | 0              | 4.807569                | -1.429622 | 0.271626  |
| 18               | 6                | 0              | 5.004876                | -2.512729 | -0.612943 |
| 19               | 1                | 0              | 5.052253                | -2.171548 | -1.651789 |
| 20               | 1                | 0              | 5.957180                | -2.958635 | -0.335082 |
| 21               | 1                | 0              | 4.210082                | -3.258112 | -0.508344 |
| 22               | 7                | 0              | -1.425479               | 0.015651  | 0.125979  |
| 23               | 1                | 0              | -0.675195               | -0.630065 | 0.336775  |
| 24               | 6                | 0              | -2.723058               | -0.514532 | 0.093041  |
| 25               | 6                | 0              | -2.942849               | -1.775130 | 0.655713  |
| 26               | 6                | 0              | -3.786706               | 0.166267  | -0.503618 |
| 27               | 6                | 0              | -4.208973               | -2.341082 | 0.629160  |
| 28               | 1                | 0              | -2.117753               | -2.301215 | 1.124372  |
| 29               | 6                | 0              | -5.052854               | -0.405841 | -0.510658 |
| 30               | 1                | 0              | -3.629232               | 1.125169  | -0.980614 |
| 31               | 6                | 0              | -5.275099               | -1.658060 | 0.051677  |
| 32               | 1                | 0              | -4.362901               | -3.318437 | 1.071248  |
| 33               | 1                | 0              | -5.870377               | 0.131366  | -0.976839 |
| 34               | 1                | 0              | -6.263980               | -2.098207 | 0.035059  |

## Structure 26b (CHCl<sub>3</sub>)

Energy (Hartrees): -823.812711279

No imaginary frequencies

Standard orientation:

| Center<br>Number | Atomic<br>Number | Atomic<br>Type | Coordinates (Angstroms) |           |           |
|------------------|------------------|----------------|-------------------------|-----------|-----------|
|                  |                  |                | X                       | Y         | Z         |
| 1                | 6                | 0              | 2.396184                | 1.163555  | 0.970750  |
| 2                | 6                | 0              | 3.525905                | 0.365433  | 1.028867  |
| 3                | 6                | 0              | 3.680031                | -0.701985 | 0.139108  |
| 4                | 6                | 0              | 2.691680                | -0.954590 | -0.812000 |
| 5                | 6                | 0              | 1.564161                | -0.136733 | -0.861071 |
| 6                | 6                | 0              | 1.387868                | 0.928299  | 0.023731  |
| 7                | 1                | 0              | 2.285436                | 1.979901  | 1.677367  |
| 8                | 1                | 0              | 4.303131                | 0.546488  | 1.762447  |
| 9                | 1                | 0              | 2.789911                | -1.764734 | -1.522379 |
| 10               | 1                | 0              | 0.812678                | -0.326553 | -1.621496 |
| 11               | 6                | 0              | 0.186270                | 1.793488  | -0.045441 |
| 12               | 6                | 0              | -1.088546               | 1.310311  | -0.031756 |
| 13               | 6                | 0              | 0.351366                | 3.239916  | -0.138378 |
| 14               | 1                | 0              | -1.905039               | 2.019371  | -0.121416 |
| 15               | 1                | 0              | 1.402056                | 3.580670  | -0.196152 |
| 16               | 8                | 0              | -0.549729               | 4.061350  | -0.167970 |
| 17               | 8                | 0              | 4.816149                | -1.430574 | 0.275246  |
| 18               | 6                | 0              | 5.033360                | -2.497208 | -0.634508 |
| 19               | 1                | 0              | 5.077891                | -2.132505 | -1.664911 |
| 20               | 1                | 0              | 5.993634                | -2.931202 | -0.362480 |
| 21               | 1                | 0              | 4.253259                | -3.259058 | -0.544398 |
| 22               | 7                | 0              | -1.434678               | 0.015603  | 0.122543  |
| 23               | 1                | 0              | -0.695372               | -0.640398 | 0.349272  |
| 24               | 6                | 0              | -2.737577               | -0.509010 | 0.087871  |
| 25               | 6                | 0              | -2.963832               | -1.753183 | 0.684538  |
| 26               | 6                | 0              | -3.791590               | 0.157714  | -0.542031 |
| 27               | 6                | 0              | -4.232372               | -2.315915 | 0.663807  |
| 28               | 1                | 0              | -2.141273               | -2.267547 | 1.170520  |
| 29               | 6                | 0              | -5.060119               | -0.411994 | -0.544358 |
| 30               | 1                | 0              | -3.627208               | 1.100753  | -1.048664 |
| 31               | 6                | 0              | -5.291250               | -1.646242 | 0.055364  |
| 32               | 1                | 0              | -4.393357               | -3.279894 | 1.133034  |
| 33               | 1                | 0              | -5.871644               | 0.112219  | -1.036248 |
| 34               | 1                | 0              | -6.281954               | -2.084069 | 0.042534  |

## Structure 26b (DMSO)

Energy (Hartrees): -823.811173854

No imaginary frequencies

Standard orientation:

| Center<br>Number | Atomic<br>Number | Atomic<br>Type | Coordinates (Angstroms) |           |           |
|------------------|------------------|----------------|-------------------------|-----------|-----------|
|                  |                  |                | X                       | Y         | Z         |
| 1                | 6                | 0              | 2.441076                | 1.214220  | 0.905648  |
| 2                | 6                | 0              | 3.581578                | 0.430190  | 0.955156  |
| 3                | 6                | 0              | 3.708258                | -0.683272 | 0.118178  |
| 4                | 6                | 0              | 2.679967                | -0.994370 | -0.772056 |
| 5                | 6                | 0              | 1.543802                | -0.188185 | -0.816474 |
| 6                | 6                | 0              | 1.394440                | 0.921560  | 0.017709  |
| 7                | 1                | 0              | 2.354182                | 2.064910  | 1.574141  |
| 8                | 1                | 0              | 4.386255                | 0.659986  | 1.644364  |
| 9                | 1                | 0              | 2.751677                | -1.842787 | -1.439901 |
| 10               | 1                | 0              | 0.765740                | -0.427588 | -1.534761 |
| 11               | 6                | 0              | 0.188787                | 1.780294  | -0.046358 |
| 12               | 6                | 0              | -1.088802               | 1.300137  | -0.025404 |
| 13               | 6                | 0              | 0.352944                | 3.226149  | -0.147510 |
| 14               | 1                | 0              | -1.900607               | 2.014073  | -0.117063 |
| 15               | 1                | 0              | 1.403066                | 3.565620  | -0.219753 |
| 16               | 8                | 0              | -0.547176               | 4.050032  | -0.171513 |
| 17               | 8                | 0              | 4.855787                | -1.393782 | 0.239699  |
| 18               | 6                | 0              | 5.002831                | -2.554305 | -0.567211 |
| 19               | 1                | 0              | 4.996814                | -2.300051 | -1.630876 |
| 20               | 1                | 0              | 5.968191                | -2.982157 | -0.303732 |
| 21               | 1                | 0              | 4.213672                | -3.281973 | -0.357410 |
| 22               | 7                | 0              | -1.444600               | 0.010743  | 0.135472  |
| 23               | 1                | 0              | -0.713434               | -0.657102 | 0.358211  |
| 24               | 6                | 0              | -2.750699               | -0.503358 | 0.096395  |
| 25               | 6                | 0              | -2.974980               | -1.765946 | 0.654870  |
| 26               | 6                | 0              | -3.808941               | 0.187285  | -0.500523 |
| 27               | 6                | 0              | -4.245905               | -2.323816 | 0.628686  |
| 28               | 1                | 0              | -2.146766               | -2.297707 | 1.111954  |
| 29               | 6                | 0              | -5.079610               | -0.378722 | -0.508586 |
| 30               | 1                | 0              | -3.649393               | 1.146632  | -0.977208 |
| 31               | 6                | 0              | -5.309089               | -1.631500 | 0.052892  |
| 32               | 1                | 0              | -4.404647               | -3.302956 | 1.066604  |
| 33               | 1                | 0              | -5.894004               | 0.163735  | -0.975640 |
| 34               | 1                | 0              | -6.301377               | -2.065997 | 0.034805  |

## Structure 26b (C<sub>2</sub>H<sub>5</sub>OH)

Energy (Hartrees): -823.814163948

No imaginary frequencies

Standard orientation:

| Center<br>Number | Atomic<br>Number | Atomic<br>Type | Coordinates (Angstroms) |           |           |
|------------------|------------------|----------------|-------------------------|-----------|-----------|
|                  |                  |                | X                       | Y         | Z         |
| 1                | 6                | 0              | 2.422525                | 1.201961  | 0.921209  |
| 2                | 6                | 0              | 3.558365                | 0.411478  | 0.975202  |
| 3                | 6                | 0              | 3.692528                | -0.684013 | 0.117690  |
| 4                | 6                | 0              | 2.683137                | -0.971846 | -0.799876 |
| 5                | 6                | 0              | 1.552116                | -0.158674 | -0.848857 |
| 6                | 6                | 0              | 1.392852                | 0.932736  | 0.007190  |
| 7                | 1                | 0              | 2.325282                | 2.038000  | 1.606577  |
| 8                | 1                | 0              | 4.351199                | 0.620691  | 1.684739  |
| 9                | 1                | 0              | 2.765023                | -1.806337 | -1.483901 |
| 10               | 1                | 0              | 0.785978                | -0.377718 | -1.586348 |
| 11               | 6                | 0              | 0.187108                | 1.793096  | -0.053694 |
| 12               | 6                | 0              | -1.091594               | 1.305250  | -0.031422 |
| 13               | 6                | 0              | 0.349605                | 3.230353  | -0.139266 |
| 14               | 1                | 0              | -1.911436               | 2.010909  | -0.117436 |
| 15               | 1                | 0              | 1.395167                | 3.575786  | -0.220934 |
| 16               | 8                | 0              | -0.554212               | 4.062209  | -0.138359 |
| 17               | 8                | 0              | 4.837053                | -1.407356 | 0.249678  |
| 18               | 6                | 0              | 4.993284                | -2.561269 | -0.567399 |
| 19               | 1                | 0              | 5.008744                | -2.293221 | -1.627181 |
| 20               | 1                | 0              | 5.951376                | -2.995472 | -0.287941 |
| 21               | 1                | 0              | 4.195232                | -3.284203 | -0.377425 |
| 22               | 7                | 0              | -1.434685               | 0.016039  | 0.123434  |
| 23               | 1                | 0              | -0.696268               | -0.647362 | 0.336985  |
| 24               | 6                | 0              | -2.740281               | -0.507544 | 0.089593  |
| 25               | 6                | 0              | -2.961920               | -1.754906 | 0.680131  |
| 26               | 6                | 0              | -3.794858               | 0.163778  | -0.533606 |
| 27               | 6                | 0              | -4.231357               | -2.316910 | 0.661741  |
| 28               | 1                | 0              | -2.135218               | -2.271974 | 1.156436  |
| 29               | 6                | 0              | -5.064074               | -0.405162 | -0.533173 |
| 30               | 1                | 0              | -3.632456               | 1.108876  | -1.037469 |
| 31               | 6                | 0              | -5.292567               | -1.642665 | 0.061774  |
| 32               | 1                | 0              | -4.390549               | -3.284285 | 1.125026  |
| 33               | 1                | 0              | -5.877468               | 0.121485  | -1.019790 |
| 34               | 1                | 0              | -6.283740               | -2.080248 | 0.050635  |

## Structure 26c (vacuum)

Energy (Hartrees): -823.787721553

No imaginary frequencies

Standard orientation:

| Center<br>Number | Atomic<br>Number | Atomic<br>Type | Coordinates (Angstroms) |           |           |
|------------------|------------------|----------------|-------------------------|-----------|-----------|
|                  |                  |                | X                       | Y         | Z         |
| 1                | 6                | 0              | -2.369229               | 1.093586  | 0.918384  |
| 2                | 6                | 0              | -3.439435               | 0.223306  | 0.997552  |
| 3                | 6                | 0              | -3.520449               | -0.877269 | 0.139109  |
| 4                | 6                | 0              | -2.518325               | -1.090951 | -0.804645 |
| 5                | 6                | 0              | -1.444003               | -0.204636 | -0.871882 |
| 6                | 6                | 0              | -1.340531               | 0.887528  | -0.012632 |
| 7                | 1                | 0              | -2.325978               | 1.953869  | 1.574672  |
| 8                | 1                | 0              | -4.236738               | 0.375714  | 1.714535  |
| 9                | 1                | 0              | -2.563635               | -1.920844 | -1.496595 |
| 10               | 1                | 0              | -0.682916               | -0.359643 | -1.630498 |
| 11               | 6                | 0              | -0.186024               | 1.809815  | -0.089090 |
| 12               | 6                | 0              | 1.104215                | 1.387929  | -0.072224 |
| 13               | 6                | 0              | -0.384921               | 3.258682  | -0.135009 |
| 14               | 1                | 0              | 1.901311                | 2.121046  | -0.146757 |
| 15               | 8                | 0              | -4.609016               | -1.673113 | 0.295541  |
| 16               | 6                | 0              | -4.747781               | -2.775921 | -0.574865 |
| 17               | 1                | 0              | -3.915257               | -3.477805 | -0.461495 |
| 18               | 1                | 0              | -5.675657               | -3.268239 | -0.292757 |
| 19               | 1                | 0              | -4.810894               | -2.450354 | -1.617998 |
| 20               | 7                | 0              | 1.510441                | 0.100870  | 0.081974  |
| 21               | 1                | 0              | 0.791054                | -0.573915 | 0.309428  |
| 22               | 6                | 0              | 2.833248                | -0.360739 | 0.072189  |
| 23               | 6                | 0              | 3.115547                | -1.589677 | 0.675876  |
| 24               | 6                | 0              | 3.864354                | 0.355031  | -0.540489 |
| 25               | 6                | 0              | 4.409686                | -2.088256 | 0.674304  |
| 26               | 1                | 0              | 2.315646                | -2.143466 | 1.155971  |
| 27               | 6                | 0              | 5.159912                | -0.148313 | -0.521109 |
| 28               | 1                | 0              | 3.659340                | 1.284667  | -1.055901 |
| 29               | 6                | 0              | 5.443390                | -1.367850 | 0.082831  |
| 30               | 1                | 0              | 4.611336                | -3.041801 | 1.147749  |
| 31               | 1                | 0              | 5.951416                | 0.415695  | -1.000395 |
| 32               | 1                | 0              | 6.454212                | -1.755143 | 0.087193  |
| 33               | 8                | 0              | -1.450910               | 3.825293  | -0.078734 |
| 34               | 1                | 0              | 0.555159                | 3.843097  | -0.225226 |



## Structure 26c (CHCl<sub>3</sub>)

Energy (Hartrees): -823.815370540

No imaginary frequencies

Standard orientation:

| Center<br>Number | Atomic<br>Number | Atomic<br>Type | Coordinates (Angstroms) |           |           |
|------------------|------------------|----------------|-------------------------|-----------|-----------|
|                  |                  |                | X                       | Y         | Z         |
| 1                | 6                | 0              | -2.345970               | 1.063796  | 0.966145  |
| 2                | 6                | 0              | -3.424162               | 0.200663  | 1.042283  |
| 3                | 6                | 0              | -3.534392               | -0.871343 | 0.150355  |
| 4                | 6                | 0              | -2.553186               | -1.063681 | -0.821179 |
| 5                | 6                | 0              | -1.471841               | -0.185398 | -0.883395 |
| 6                | 6                | 0              | -1.341173               | 0.882139  | 0.004108  |
| 7                | 1                | 0              | -2.275862               | 1.893440  | 1.660041  |
| 8                | 1                | 0              | -4.199785               | 0.338999  | 1.786774  |
| 9                | 1                | 0              | -2.618716               | -1.874332 | -1.534688 |
| 10               | 1                | 0              | -0.722717               | -0.332541 | -1.655602 |
| 11               | 6                | 0              | -0.180591               | 1.799898  | -0.071251 |
| 12               | 6                | 0              | 1.114390                | 1.371750  | -0.066633 |
| 13               | 6                | 0              | -0.363170               | 3.239697  | -0.125472 |
| 14               | 1                | 0              | 1.909827                | 2.106364  | -0.149148 |
| 15               | 8                | 0              | -4.623612               | -1.665464 | 0.305873  |
| 16               | 6                | 0              | -4.809966               | -2.722617 | -0.621292 |
| 17               | 1                | 0              | -3.986944               | -3.442061 | -0.573614 |
| 18               | 1                | 0              | -5.735668               | -3.216020 | -0.331338 |
| 19               | 1                | 0              | -4.906756               | -2.338024 | -1.640870 |
| 20               | 7                | 0              | 1.517226                | 0.090556  | 0.073780  |
| 21               | 1                | 0              | 0.806769                | -0.597149 | 0.299026  |
| 22               | 6                | 0              | 2.845646                | -0.367275 | 0.063225  |
| 23               | 6                | 0              | 3.132474                | -1.578854 | 0.698876  |
| 24               | 6                | 0              | 3.867766                | 0.335332  | -0.579617 |
| 25               | 6                | 0              | 4.429066                | -2.074185 | 0.701865  |
| 26               | 1                | 0              | 2.334396                | -2.120054 | 1.196443  |
| 27               | 6                | 0              | 5.165324                | -0.165263 | -0.556886 |
| 28               | 1                | 0              | 3.655670                | 1.251100  | -1.117775 |
| 29               | 6                | 0              | 5.455860                | -1.367316 | 0.080687  |
| 30               | 1                | 0              | 4.637527                | -3.013361 | 1.201416  |
| 31               | 1                | 0              | 5.952246                | 0.386063  | -1.058931 |
| 32               | 1                | 0              | 6.468381                | -1.751980 | 0.087977  |
| 33               | 8                | 0              | -1.430773               | 3.824754  | -0.103910 |
| 34               | 1                | 0              | 0.579677                | 3.817275  | -0.192795 |

## Structure 26c (DMSO)

Energy (Hartrees): -823.814916633

No imaginary frequencies

Standard orientation:

| Center<br>Number | Atomic<br>Number | Atomic<br>Type | Coordinates (Angstroms) |           |           |
|------------------|------------------|----------------|-------------------------|-----------|-----------|
|                  |                  |                | X                       | Y         | Z         |
| 1                | 6                | 0              | -2.294348               | 1.043246  | 1.007939  |
| 2                | 6                | 0              | -3.367823               | 0.175488  | 1.106662  |
| 3                | 6                | 0              | -3.515344               | -0.872249 | 0.189960  |
| 4                | 6                | 0              | -2.575085               | -1.034931 | -0.827036 |
| 5                | 6                | 0              | -1.499168               | -0.151211 | -0.911754 |
| 6                | 6                | 0              | -1.333189               | 0.893202  | -0.002765 |
| 7                | 1                | 0              | -2.192281               | 1.848483  | 1.726841  |
| 8                | 1                | 0              | -4.107731               | 0.291721  | 1.890585  |
| 9                | 1                | 0              | -2.666199               | -1.829049 | -1.556320 |
| 10               | 1                | 0              | -0.780242               | -0.280798 | -1.715275 |
| 11               | 6                | 0              | -0.181036               | 1.820412  | -0.103027 |
| 12               | 6                | 0              | 1.119093                | 1.402202  | -0.106116 |
| 13               | 6                | 0              | -0.380197               | 3.254630  | -0.188653 |
| 14               | 1                | 0              | 1.904647                | 2.144651  | -0.201842 |
| 15               | 8                | 0              | -4.594899               | -1.671782 | 0.367689  |
| 16               | 6                | 0              | -4.801931               | -2.717329 | -0.571969 |
| 17               | 1                | 0              | -3.969283               | -3.426416 | -0.564591 |
| 18               | 1                | 0              | -5.711942               | -3.225872 | -0.259386 |
| 19               | 1                | 0              | -4.936814               | -2.317107 | -1.580893 |
| 20               | 7                | 0              | 1.524048                | 0.122950  | 0.023946  |
| 21               | 1                | 0              | 0.807686                | -0.577877 | 0.183850  |
| 22               | 6                | 0              | 2.844978                | -0.351014 | 0.043496  |
| 23               | 6                | 0              | 3.044523                | -1.685951 | 0.411461  |
| 24               | 6                | 0              | 3.943760                | 0.442364  | -0.297980 |
| 25               | 6                | 0              | 4.325958                | -2.217844 | 0.445028  |
| 26               | 1                | 0              | 2.186256                | -2.296322 | 0.673907  |
| 27               | 6                | 0              | 5.223294                | -0.102562 | -0.253064 |
| 28               | 1                | 0              | 3.816182                | 1.471607  | -0.607778 |
| 29               | 6                | 0              | 5.426198                | -1.428623 | 0.116870  |
| 30               | 1                | 0              | 4.463820                | -3.253792 | 0.733311  |
| 31               | 1                | 0              | 6.069021                | 0.521420  | -0.519587 |
| 32               | 1                | 0              | 6.427047                | -1.842287 | 0.146002  |
| 33               | 8                | 0              | -1.456666               | 3.828101  | -0.194363 |
| 34               | 1                | 0              | 0.555923                | 3.841441  | -0.257347 |

## Structure 26c (C<sub>2</sub>H<sub>5</sub>OH)

Energy (Hartrees): -823.818424304

No imaginary frequencies

Standard orientation:

| Center<br>Number | Atomic<br>Number | Atomic<br>Type | Coordinates (Angstroms) |           |           |
|------------------|------------------|----------------|-------------------------|-----------|-----------|
|                  |                  |                | X                       | Y         | Z         |
| 1                | 6                | 0              | -2.311845               | 1.030574  | 1.012966  |
| 2                | 6                | 0              | -3.395117               | 0.172375  | 1.087560  |
| 3                | 6                | 0              | -3.535003               | -0.865336 | 0.160208  |
| 4                | 6                | 0              | -2.581754               | -1.030628 | -0.843108 |
| 5                | 6                | 0              | -1.497116               | -0.156357 | -0.904464 |
| 6                | 6                | 0              | -1.337072               | 0.879276  | 0.015876  |
| 7                | 1                | 0              | -2.213132               | 1.828320  | 1.741233  |
| 8                | 1                | 0              | -4.147127               | 0.289041  | 1.860088  |
| 9                | 1                | 0              | -2.669739               | -1.817814 | -1.580344 |
| 10               | 1                | 0              | -0.767628               | -0.285130 | -1.698421 |
| 11               | 6                | 0              | -0.177457               | 1.799843  | -0.060667 |
| 12               | 6                | 0              | 1.123712                | 1.373453  | -0.057114 |
| 13               | 6                | 0              | -0.361734               | 3.227384  | -0.131572 |
| 14               | 1                | 0              | 1.915805                | 2.111675  | -0.138371 |
| 15               | 8                | 0              | -4.628012               | -1.660156 | 0.314967  |
| 16               | 6                | 0              | -4.834580               | -2.695738 | -0.638365 |
| 17               | 1                | 0              | -4.008366               | -3.411857 | -0.625927 |
| 18               | 1                | 0              | -5.753171               | -3.196992 | -0.339441 |
| 19               | 1                | 0              | -4.954132               | -2.282028 | -1.643367 |
| 20               | 7                | 0              | 1.523583                | 0.097410  | 0.073887  |
| 21               | 1                | 0              | 0.813082                | -0.600506 | 0.271261  |
| 22               | 6                | 0              | 2.853252                | -0.364385 | 0.060224  |
| 23               | 6                | 0              | 3.122715                | -1.600897 | 0.653153  |
| 24               | 6                | 0              | 3.886121                | 0.356764  | -0.542661 |
| 25               | 6                | 0              | 4.416986                | -2.103549 | 0.656886  |
| 26               | 1                | 0              | 2.313127                | -2.156445 | 1.115364  |
| 27               | 6                | 0              | 5.180630                | -0.152788 | -0.520143 |
| 28               | 1                | 0              | 3.690057                | 1.294549  | -1.048350 |
| 29               | 6                | 0              | 5.456053                | -1.379342 | 0.077083  |
| 30               | 1                | 0              | 4.612480                | -3.062875 | 1.122862  |
| 31               | 1                | 0              | 5.977235                | 0.412260  | -0.991074 |
| 32               | 1                | 0              | 6.466818                | -1.769511 | 0.084037  |
| 33               | 8                | 0              | -1.441909               | 3.810990  | -0.142070 |
| 34               | 1                | 0              | 0.572223                | 3.814882  | -0.185117 |

## Structure 26d (vacuum)

Energy (Hartrees): -823.777790106

No imaginary frequencies

Standard orientation:

| Center<br>Number | Atomic<br>Number | Atomic<br>Type | Coordinates (Angstroms) |           |           |
|------------------|------------------|----------------|-------------------------|-----------|-----------|
|                  |                  |                | X                       | Y         | Z         |
| 1                | 6                | 0              | -2.552767               | 1.007633  | 0.529871  |
| 2                | 6                | 0              | -3.776356               | 0.346293  | 0.601788  |
| 3                | 6                | 0              | -3.931502               | -0.892050 | -0.018012 |
| 4                | 6                | 0              | -2.859495               | -1.451050 | -0.716247 |
| 5                | 6                | 0              | -1.653336               | -0.777984 | -0.785818 |
| 6                | 6                | 0              | -1.468110               | 0.457768  | -0.150577 |
| 7                | 1                | 0              | -2.447011               | 1.971612  | 1.010169  |
| 8                | 1                | 0              | -4.592183               | 0.809156  | 1.140449  |
| 9                | 1                | 0              | -3.005161               | -2.404029 | -1.209980 |
| 10               | 1                | 0              | -0.842839               | -1.208667 | -1.364972 |
| 11               | 6                | 0              | -0.156379               | 1.148575  | -0.199476 |
| 12               | 6                | 0              | 0.985638                | 0.430352  | -0.021023 |
| 13               | 6                | 0              | -0.095417               | 2.588842  | -0.455954 |
| 14               | 1                | 0              | 0.896459                | -0.636112 | 0.159478  |
| 15               | 7                | 0              | 2.273556                | 0.880982  | 0.011068  |
| 16               | 1                | 0              | 2.442608                | 1.873184  | 0.058172  |
| 17               | 6                | 0              | 3.411356                | 0.061325  | 0.069647  |
| 18               | 6                | 0              | 4.600395                | 0.597196  | 0.572561  |
| 19               | 6                | 0              | 3.389992                | -1.261182 | -0.377719 |
| 20               | 6                | 0              | 5.745061                | -0.183431 | 0.638321  |
| 21               | 1                | 0              | 4.618201                | 1.624043  | 0.922351  |
| 22               | 6                | 0              | 4.538620                | -2.038976 | -0.288301 |
| 23               | 1                | 0              | 2.493704                | -1.677263 | -0.819935 |
| 24               | 6                | 0              | 5.720411                | -1.509788 | 0.217036  |
| 25               | 1                | 0              | 6.659132                | 0.245830  | 1.031084  |
| 26               | 1                | 0              | 4.509126                | -3.064370 | -0.637252 |
| 27               | 1                | 0              | 6.613388                | -2.119300 | 0.273255  |
| 28               | 8                | 0              | -5.078412               | -1.620947 | -0.007415 |
| 29               | 6                | 0              | -6.188500               | -1.087986 | 0.682784  |
| 30               | 1                | 0              | -6.988843               | -1.816605 | 0.574101  |
| 31               | 1                | 0              | -5.964741               | -0.948745 | 1.745295  |
| 32               | 1                | 0              | -6.503755               | -0.133636 | 0.249022  |
| 33               | 1                | 0              | 0.921948                | 3.008168  | -0.599349 |
| 34               | 8                | 0              | -1.044413               | 3.333028  | -0.542916 |

## Structure 26d (CHCl<sub>3</sub>)

Energy (Hartrees): -823.806246669

No imaginary frequencies

Standard orientation:

| Center<br>Number | Atomic<br>Number | Atomic<br>Type | Coordinates (Angstroms) |           |           |
|------------------|------------------|----------------|-------------------------|-----------|-----------|
|                  |                  |                | X                       | Y         | Z         |
| 1                | 6                | 0              | -2.552906               | 1.001785  | 0.544075  |
| 2                | 6                | 0              | -3.781652               | 0.347314  | 0.609358  |
| 3                | 6                | 0              | -3.937969               | -0.891065 | -0.012096 |
| 4                | 6                | 0              | -2.862184               | -1.454800 | -0.702737 |
| 5                | 6                | 0              | -1.651469               | -0.786342 | -0.767007 |
| 6                | 6                | 0              | -1.465454               | 0.451159  | -0.133961 |
| 7                | 1                | 0              | -2.445368               | 1.960194  | 1.037044  |
| 8                | 1                | 0              | -4.598511               | 0.811830  | 1.146079  |
| 9                | 1                | 0              | -3.002091               | -2.409868 | -1.196090 |
| 10               | 1                | 0              | -0.836889               | -1.226604 | -1.333465 |
| 11               | 6                | 0              | -0.153293               | 1.145316  | -0.179513 |
| 12               | 6                | 0              | 0.992920                | 0.423565  | 0.005791  |
| 13               | 6                | 0              | -0.091559               | 2.569158  | -0.474068 |
| 14               | 1                | 0              | 0.902432                | -0.647721 | 0.159638  |
| 15               | 7                | 0              | 2.269720                | 0.876571  | 0.063305  |
| 16               | 1                | 0              | 2.440226                | 1.869585  | 0.144309  |
| 17               | 6                | 0              | 3.412625                | 0.059609  | 0.094425  |
| 18               | 6                | 0              | 4.600647                | 0.595435  | 0.601150  |
| 19               | 6                | 0              | 3.395854                | -1.251645 | -0.386091 |
| 20               | 6                | 0              | 5.752914                | -0.177707 | 0.637340  |
| 21               | 1                | 0              | 4.610256                | 1.616123  | 0.969236  |
| 22               | 6                | 0              | 4.553351                | -2.021100 | -0.328076 |
| 23               | 1                | 0              | 2.497853                | -1.666964 | -0.826670 |
| 24               | 6                | 0              | 5.735613                | -1.493669 | 0.180917  |
| 25               | 1                | 0              | 6.667490                | 0.249656  | 1.032362  |
| 26               | 1                | 0              | 4.529272                | -3.037745 | -0.703330 |
| 27               | 1                | 0              | 6.635306                | -2.096286 | 0.212093  |
| 28               | 8                | 0              | -5.087656               | -1.614815 | -0.003877 |
| 29               | 6                | 0              | -6.210744               | -1.060601 | 0.660889  |
| 30               | 1                | 0              | -7.014659               | -1.785895 | 0.548911  |
| 31               | 1                | 0              | -6.005957               | -0.908776 | 1.724901  |
| 32               | 1                | 0              | -6.510611               | -0.112797 | 0.203921  |
| 33               | 1                | 0              | 0.921640                | 2.995142  | -0.594383 |
| 34               | 8                | 0              | -1.049667               | 3.304272  | -0.629880 |

## Structure 26d (DMSO)

Energy (Hartrees): -823.806455738

No imaginary frequencies

Standard orientation:

| Center<br>Number | Atomic<br>Number | Atomic<br>Type | Coordinates (Angstroms) |           |           |
|------------------|------------------|----------------|-------------------------|-----------|-----------|
|                  |                  |                | X                       | Y         | Z         |
| 1                | 6                | 0              | -2.543015               | 0.971013  | 0.596785  |
| 2                | 6                | 0              | -3.771992               | 0.314906  | 0.650301  |
| 3                | 6                | 0              | -3.941593               | -0.890478 | -0.032150 |
| 4                | 6                | 0              | -2.874738               | -1.421692 | -0.762679 |
| 5                | 6                | 0              | -1.663676               | -0.750830 | -0.814355 |
| 6                | 6                | 0              | -1.467039               | 0.457209  | -0.128855 |
| 7                | 1                | 0              | -2.425807               | 1.900925  | 1.139922  |
| 8                | 1                | 0              | -4.577885               | 0.749830  | 1.226976  |
| 9                | 1                | 0              | -3.018382               | -2.353278 | -1.298305 |
| 10               | 1                | 0              | -0.856383               | -1.167170 | -1.408505 |
| 11               | 6                | 0              | -0.156689               | 1.153487  | -0.167043 |
| 12               | 6                | 0              | 0.990644                | 0.416120  | -0.035045 |
| 13               | 6                | 0              | -0.095937               | 2.588439  | -0.385044 |
| 14               | 1                | 0              | 0.888640                | -0.655026 | 0.107121  |
| 15               | 7                | 0              | 2.269132                | 0.853498  | -0.030695 |
| 16               | 1                | 0              | 2.452550                | 1.848954  | -0.025350 |
| 17               | 6                | 0              | 3.411105                | 0.038328  | 0.049890  |
| 18               | 6                | 0              | 4.614789                | 0.635408  | 0.439404  |
| 19               | 6                | 0              | 3.385225                | -1.322499 | -0.266855 |
| 20               | 6                | 0              | 5.773385                | -0.124218 | 0.527393  |
| 21               | 1                | 0              | 4.629973                | 1.694298  | 0.676242  |
| 22               | 6                | 0              | 4.551232                | -2.074554 | -0.160590 |
| 23               | 1                | 0              | 2.475524                | -1.796730 | -0.613660 |
| 24               | 6                | 0              | 5.748733                | -1.486517 | 0.235683  |
| 25               | 1                | 0              | 6.698468                | 0.352098  | 0.831607  |
| 26               | 1                | 0              | 4.519927                | -3.129884 | -0.406828 |
| 27               | 1                | 0              | 6.652671                | -2.079203 | 0.308615  |
| 28               | 8                | 0              | -5.094402               | -1.605990 | -0.046528 |
| 29               | 6                | 0              | -6.212454               | -1.059899 | 0.638390  |
| 30               | 1                | 0              | -7.032406               | -1.758582 | 0.483918  |
| 31               | 1                | 0              | -6.013032               | -0.966514 | 1.709609  |
| 32               | 1                | 0              | -6.485560               | -0.083341 | 0.228546  |
| 33               | 1                | 0              | 0.916504                | 3.026411  | -0.440569 |
| 34               | 8                | 0              | -1.055175               | 3.328163  | -0.530453 |

## Structure 26d (C<sub>2</sub>H<sub>5</sub>OH)

Energy (Hartrees): -823.809531464

No imaginary frequencies

Standard orientation:

| Center<br>Number | Atomic<br>Number | Atomic<br>Type | Coordinates (Angstroms) |           |           |
|------------------|------------------|----------------|-------------------------|-----------|-----------|
|                  |                  |                | X                       | Y         | Z         |
| 1                | 6                | 0              | -2.523638               | 0.961376  | 0.617076  |
| 2                | 6                | 0              | -3.749776               | 0.300992  | 0.675341  |
| 3                | 6                | 0              | -3.931208               | -0.875195 | -0.050841 |
| 4                | 6                | 0              | -2.886956               | -1.372694 | -0.833643 |
| 5                | 6                | 0              | -1.677810               | -0.698464 | -0.887611 |
| 6                | 6                | 0              | -1.466589               | 0.478352  | -0.155407 |
| 7                | 1                | 0              | -2.392432               | 1.866860  | 1.198300  |
| 8                | 1                | 0              | -4.541237               | 0.708103  | 1.290907  |
| 9                | 1                | 0              | -3.045264               | -2.283196 | -1.401051 |
| 10               | 1                | 0              | -0.883879               | -1.087521 | -1.517411 |
| 11               | 6                | 0              | -0.154957               | 1.174469  | -0.189195 |
| 12               | 6                | 0              | 0.994430                | 0.433390  | -0.063377 |
| 13               | 6                | 0              | -0.093341               | 2.602736  | -0.390085 |
| 14               | 1                | 0              | 0.890086                | -0.639759 | 0.065379  |
| 15               | 7                | 0              | 2.270140                | 0.866401  | -0.048447 |
| 16               | 1                | 0              | 2.458731                | 1.860961  | -0.026428 |
| 17               | 6                | 0              | 3.406815                | 0.039523  | 0.042962  |
| 18               | 6                | 0              | 4.594688                | 0.606656  | 0.512725  |
| 19               | 6                | 0              | 3.381314                | -1.303697 | -0.338180 |
| 20               | 6                | 0              | 5.740970                | -0.169609 | 0.618801  |
| 21               | 1                | 0              | 4.608127                | 1.653445  | 0.799077  |
| 22               | 6                | 0              | 4.533145                | -2.073759 | -0.212150 |
| 23               | 1                | 0              | 2.483255                | -1.747586 | -0.750552 |
| 24               | 6                | 0              | 5.715734                | -1.516909 | 0.265730  |
| 25               | 1                | 0              | 6.655964                | 0.280507  | 0.987168  |
| 26               | 1                | 0              | 4.504475                | -3.116475 | -0.508248 |
| 27               | 1                | 0              | 6.610212                | -2.122394 | 0.352386  |
| 28               | 8                | 0              | -5.084295               | -1.600089 | -0.060404 |
| 29               | 6                | 0              | -6.159927               | -1.141125 | 0.748529  |
| 30               | 1                | 0              | -6.964160               | -1.862333 | 0.614809  |
| 31               | 1                | 0              | -5.871215               | -1.109132 | 1.802759  |
| 32               | 1                | 0              | -6.499797               | -0.152968 | 0.426419  |
| 33               | 1                | 0              | 0.914072                | 3.048577  | -0.441577 |
| 34               | 8                | 0              | -1.060117               | 3.345322  | -0.529204 |

## Structure 26e (vacuum)

Energy (Hartrees): -823.773378318

No imaginary frequencies

Standard orientation:

| Center<br>Number | Atomic<br>Number | Atomic<br>Type | Coordinates (Angstroms) |           |           |
|------------------|------------------|----------------|-------------------------|-----------|-----------|
|                  |                  |                | X                       | Y         | Z         |
| 1                | 6                | 0              | 2.199962                | 1.307029  | -0.579144 |
| 2                | 6                | 0              | 3.563784                | 1.202424  | -0.394456 |
| 3                | 6                | 0              | 4.125676                | 0.015536  | 0.087519  |
| 4                | 6                | 0              | 3.298544                | -1.060781 | 0.393050  |
| 5                | 6                | 0              | 1.921447                | -0.938062 | 0.206774  |
| 6                | 6                | 0              | 1.346702                | 0.227337  | -0.295669 |
| 7                | 1                | 0              | 1.784604                | 2.234742  | -0.950551 |
| 8                | 1                | 0              | 4.225869                | 2.029805  | -0.618593 |
| 9                | 1                | 0              | 3.698371                | -1.984038 | 0.790058  |
| 10               | 1                | 0              | 1.282682                | -1.769419 | 0.485708  |
| 11               | 6                | 0              | -0.108273               | 0.302880  | -0.552147 |
| 12               | 6                | 0              | -0.744591               | -0.764294 | -1.098412 |
| 13               | 6                | 0              | -0.840880               | 1.562476  | -0.322155 |
| 14               | 1                | 0              | -0.136555               | -1.579592 | -1.484642 |
| 15               | 7                | 0              | -2.096476               | -0.967803 | -1.257181 |
| 16               | 1                | 0              | -2.343196               | -1.662986 | -1.944284 |
| 17               | 6                | 0              | -3.162715               | -0.605768 | -0.403903 |
| 18               | 6                | 0              | -2.970103               | -0.271707 | 0.938513  |
| 19               | 6                | 0              | -4.457484               | -0.642853 | -0.923822 |
| 20               | 6                | 0              | -4.066294               | 0.025399  | 1.737131  |
| 21               | 1                | 0              | -1.970682               | -0.243773 | 1.354540  |
| 22               | 6                | 0              | -5.546909               | -0.353990 | -0.111945 |
| 23               | 1                | 0              | -4.604935               | -0.890771 | -1.969613 |
| 24               | 6                | 0              | -5.358998               | -0.012606 | 1.222220  |
| 25               | 1                | 0              | -3.903569               | 0.285882  | 2.776220  |
| 26               | 1                | 0              | -6.545578               | -0.386608 | -0.531033 |
| 27               | 1                | 0              | -6.206719               | 0.224942  | 1.852437  |
| 28               | 1                | 0              | -1.862491               | 1.597226  | -0.739977 |
| 29               | 8                | 0              | -0.379742               | 2.533485  | 0.229878  |
| 30               | 8                | 0              | 5.476400                | 0.013941  | 0.231228  |
| 31               | 6                | 0              | 6.084584                | -1.169553 | 0.701116  |
| 32               | 1                | 0              | 7.153610                | -0.970539 | 0.726880  |
| 33               | 1                | 0              | 5.737354                | -1.420572 | 1.708526  |
| 34               | 1                | 0              | 5.886593                | -2.009893 | 0.027736  |



## Structure 26e (CHCl<sub>3</sub>)

Energy (Hartrees): -823.800663906

No imaginary frequencies

Standard orientation:

| Center<br>Number | Atomic<br>Number | Atomic<br>Type | Coordinates (Angstroms) |           |           |
|------------------|------------------|----------------|-------------------------|-----------|-----------|
|                  |                  |                | X                       | Y         | Z         |
| 1                | 6                | 0              | 2.193093                | 1.263809  | -0.672349 |
| 2                | 6                | 0              | 3.561309                | 1.184165  | -0.495125 |
| 3                | 6                | 0              | 4.138523                | 0.034386  | 0.056312  |
| 4                | 6                | 0              | 3.323614                | -1.030470 | 0.430801  |
| 5                | 6                | 0              | 1.942962                | -0.931416 | 0.251865  |
| 6                | 6                | 0              | 1.350642                | 0.199117  | -0.309647 |
| 7                | 1                | 0              | 1.767609                | 2.161114  | -1.104615 |
| 8                | 1                | 0              | 4.209533                | 2.004923  | -0.780093 |
| 9                | 1                | 0              | 3.738196                | -1.926470 | 0.873374  |
| 10               | 1                | 0              | 1.315809                | -1.754621 | 0.578307  |
| 11               | 6                | 0              | -0.111680               | 0.255328  | -0.540092 |
| 12               | 6                | 0              | -0.748384               | -0.843029 | -1.040969 |
| 13               | 6                | 0              | -0.843838               | 1.504249  | -0.333101 |
| 14               | 1                | 0              | -0.136747               | -1.656473 | -1.424856 |
| 15               | 7                | 0              | -2.085244               | -1.089372 | -1.157356 |
| 16               | 1                | 0              | -2.324906               | -1.837461 | -1.793815 |
| 17               | 6                | 0              | -3.166130               | -0.641327 | -0.362188 |
| 18               | 6                | 0              | -3.001032               | -0.257874 | 0.971658  |
| 19               | 6                | 0              | -4.443280               | -0.658905 | -0.923287 |
| 20               | 6                | 0              | -4.109077               | 0.113901  | 1.721701  |
| 21               | 1                | 0              | -2.014806               | -0.252882 | 1.420714  |
| 22               | 6                | 0              | -5.546639               | -0.293870 | -0.159322 |
| 23               | 1                | 0              | -4.564524               | -0.957702 | -1.959038 |
| 24               | 6                | 0              | -5.386218               | 0.100612  | 1.164444  |
| 25               | 1                | 0              | -3.970620               | 0.410136  | 2.755206  |
| 26               | 1                | 0              | -6.533366               | -0.311764 | -0.607757 |
| 27               | 1                | 0              | -6.244675               | 0.392895  | 1.757258  |
| 28               | 1                | 0              | -1.866639               | 1.530332  | -0.744111 |
| 29               | 8                | 0              | -0.388632               | 2.499563  | 0.197495  |
| 30               | 8                | 0              | 5.489517                | 0.052040  | 0.192166  |
| 31               | 6                | 0              | 6.106645                | -1.081844 | 0.778260  |
| 32               | 1                | 0              | 7.173684                | -0.868090 | 0.797801  |
| 33               | 1                | 0              | 5.749380                | -1.240333 | 1.800236  |
| 34               | 1                | 0              | 5.928641                | -1.981815 | 0.181835  |

## Structure 26e (DMSO)

Energy (Hartrees): -823.800450544

No imaginary frequencies

Standard orientation:

| Center<br>Number | Atomic<br>Number | Atomic<br>Type | Coordinates (Angstroms) |           |           |
|------------------|------------------|----------------|-------------------------|-----------|-----------|
|                  |                  |                | X                       | Y         | Z         |
| 1                | 6                | 0              | 2.177996                | 1.248653  | -0.697369 |
| 2                | 6                | 0              | 3.548381                | 1.187994  | -0.522274 |
| 3                | 6                | 0              | 4.140946                | 0.055859  | 0.050940  |
| 4                | 6                | 0              | 3.336551                | -1.009931 | 0.448017  |
| 5                | 6                | 0              | 1.954005                | -0.929034 | 0.272273  |
| 6                | 6                | 0              | 1.346253                | 0.184382  | -0.308601 |
| 7                | 1                | 0              | 1.743329                | 2.130817  | -1.151461 |
| 8                | 1                | 0              | 4.183847                | 2.010981  | -0.829601 |
| 9                | 1                | 0              | 3.760461                | -1.894768 | 0.904200  |
| 10               | 1                | 0              | 1.338716                | -1.755844 | 0.612294  |
| 11               | 6                | 0              | -0.117772               | 0.222911  | -0.533258 |
| 12               | 6                | 0              | -0.745874               | -0.901206 | -0.996265 |
| 13               | 6                | 0              | -0.858634               | 1.467070  | -0.356832 |
| 14               | 1                | 0              | -0.127814               | -1.718892 | -1.359790 |
| 15               | 7                | 0              | -2.074223               | -1.171818 | -1.092977 |
| 16               | 1                | 0              | -2.307732               | -1.956428 | -1.688577 |
| 17               | 6                | 0              | -3.160398               | -0.673698 | -0.334803 |
| 18               | 6                | 0              | -3.008259               | -0.268879 | 0.994525  |
| 19               | 6                | 0              | -4.425056               | -0.664778 | -0.922248 |
| 20               | 6                | 0              | -4.117051               | 0.157957  | 1.713396  |
| 21               | 1                | 0              | -2.031320               | -0.293137 | 1.463630  |
| 22               | 6                | 0              | -5.530475               | -0.244180 | -0.189163 |
| 23               | 1                | 0              | -4.534020               | -0.988049 | -1.952027 |
| 24               | 6                | 0              | -5.382622               | 0.175876  | 1.128573  |
| 25               | 1                | 0              | -3.991017               | 0.469178  | 2.744284  |
| 26               | 1                | 0              | -6.508682               | -0.241268 | -0.656523 |
| 27               | 1                | 0              | -6.242873               | 0.508647  | 1.697329  |
| 28               | 1                | 0              | -1.880880               | 1.473251  | -0.769798 |
| 29               | 8                | 0              | -0.417209               | 2.483412  | 0.150507  |
| 30               | 8                | 0              | 5.490436                | 0.088490  | 0.182911  |
| 31               | 6                | 0              | 6.116517                | -1.037098 | 0.781657  |
| 32               | 1                | 0              | 7.182280                | -0.817123 | 0.797407  |
| 33               | 1                | 0              | 5.760356                | -1.186998 | 1.804964  |
| 34               | 1                | 0              | 5.942053                | -1.944242 | 0.195745  |

## Structure 26e (C<sub>2</sub>H<sub>5</sub>OH)

Energy (Hartrees): -823.803629262

No imaginary frequencies

Standard orientation:

| Center<br>Number | Atomic<br>Number | Atomic<br>Type | Coordinates (Angstroms) |           |           |
|------------------|------------------|----------------|-------------------------|-----------|-----------|
|                  |                  |                | X                       | Y         | Z         |
| 1                | 6                | 0              | 2.163100                | 1.248278  | -0.710290 |
| 2                | 6                | 0              | 3.535397                | 1.195026  | -0.546294 |
| 3                | 6                | 0              | 4.133940                | 0.070952  | 0.033771  |
| 4                | 6                | 0              | 3.340595                | -0.994982 | 0.448262  |
| 5                | 6                | 0              | 1.956428                | -0.920755 | 0.284477  |
| 6                | 6                | 0              | 1.340276                | 0.185593  | -0.300392 |
| 7                | 1                | 0              | 1.720568                | 2.121979  | -1.174553 |
| 8                | 1                | 0              | 4.167151                | 2.015754  | -0.867853 |
| 9                | 1                | 0              | 3.773467                | -1.873701 | 0.907814  |
| 10               | 1                | 0              | 1.346352                | -1.746666 | 0.636422  |
| 11               | 6                | 0              | -0.128037               | 0.216432  | -0.507168 |
| 12               | 6                | 0              | -0.745425               | -0.909598 | -0.993812 |
| 13               | 6                | 0              | -0.873813               | 1.436947  | -0.279142 |
| 14               | 1                | 0              | -0.112810               | -1.700178 | -1.390675 |
| 15               | 7                | 0              | -2.060023               | -1.215061 | -1.074836 |
| 16               | 1                | 0              | -2.283702               | -2.006147 | -1.666020 |
| 17               | 6                | 0              | -3.157131               | -0.697185 | -0.337195 |
| 18               | 6                | 0              | -3.033443               | -0.385975 | 1.018972  |
| 19               | 6                | 0              | -4.389474               | -0.572834 | -0.973824 |
| 20               | 6                | 0              | -4.141428               | 0.069506  | 1.720390  |
| 21               | 1                | 0              | -2.077557               | -0.500535 | 1.518069  |
| 22               | 6                | 0              | -5.497321               | -0.127126 | -0.257881 |
| 23               | 1                | 0              | -4.473301               | -0.822219 | -2.026144 |
| 24               | 6                | 0              | -5.377414               | 0.202734  | 1.087503  |
| 25               | 1                | 0              | -4.041334               | 0.310049  | 2.772834  |
| 26               | 1                | 0              | -6.453570               | -0.031759 | -0.759930 |
| 27               | 1                | 0              | -6.238629               | 0.555727  | 1.642778  |
| 28               | 1                | 0              | -1.909486               | 1.450506  | -0.650947 |
| 29               | 8                | 0              | -0.421817               | 2.452230  | 0.239783  |
| 30               | 8                | 0              | 5.489668                | 0.110909  | 0.154949  |
| 31               | 6                | 0              | 6.129002                | -1.005789 | 0.760644  |
| 32               | 1                | 0              | 7.192830                | -0.775898 | 0.766821  |
| 33               | 1                | 0              | 5.779333                | -1.146309 | 1.787125  |
| 34               | 1                | 0              | 5.956532                | -1.917627 | 0.182128  |

## Structure 26f (vacuum)

Energy (Hartrees): -823.772539811

No imaginary frequencies

Standard orientation:

| Center<br>Number | Atomic<br>Number | Atomic<br>Type | Coordinates (Angstroms) |           |           |
|------------------|------------------|----------------|-------------------------|-----------|-----------|
|                  |                  |                | X                       | Y         | Z         |
| 1                | 6                | 0              | 2.281718                | 1.429956  | -0.285353 |
| 2                | 6                | 0              | 3.652309                | 1.313163  | -0.155096 |
| 3                | 6                | 0              | 4.233277                | 0.064328  | 0.083862  |
| 4                | 6                | 0              | 3.420313                | -1.060089 | 0.196437  |
| 5                | 6                | 0              | 2.037747                | -0.921752 | 0.078257  |
| 6                | 6                | 0              | 1.439106                | 0.311346  | -0.173552 |
| 7                | 1                | 0              | 1.855193                | 2.402871  | -0.504078 |
| 8                | 1                | 0              | 4.303299                | 2.173984  | -0.246574 |
| 9                | 1                | 0              | 3.838656                | -2.038183 | 0.392295  |
| 10               | 1                | 0              | 1.410631                | -1.797227 | 0.209111  |
| 11               | 6                | 0              | -0.029381               | 0.437419  | -0.327868 |
| 12               | 6                | 0              | -0.673545               | -0.457635 | -1.132887 |
| 13               | 6                | 0              | -0.680480               | 1.605296  | 0.273330  |
| 14               | 1                | 0              | -0.044644               | -1.105635 | -1.740354 |
| 15               | 1                | 0              | -0.022048               | 2.202801  | 0.933281  |
| 16               | 8                | 0              | -1.822436               | 1.957991  | 0.075245  |
| 17               | 7                | 0              | -1.999799               | -0.675121 | -1.343640 |
| 18               | 1                | 0              | -2.208914               | -1.221152 | -2.165508 |
| 19               | 6                | 0              | -3.107312               | -0.500303 | -0.484735 |
| 20               | 6                | 0              | -2.971625               | -0.482706 | 0.901255  |
| 21               | 6                | 0              | -4.375970               | -0.430061 | -1.058770 |
| 22               | 6                | 0              | -4.102598               | -0.390264 | 1.700722  |
| 23               | 1                | 0              | -1.986911               | -0.546279 | 1.346549  |
| 24               | 6                | 0              | -5.501296               | -0.341416 | -0.250988 |
| 25               | 1                | 0              | -4.474617               | -0.430772 | -2.139105 |
| 26               | 6                | 0              | -5.370826               | -0.318590 | 1.133495  |
| 27               | 1                | 0              | -3.988639               | -0.374032 | 2.778100  |
| 28               | 1                | 0              | -6.482179               | -0.280758 | -0.707271 |
| 29               | 1                | 0              | -6.247951               | -0.242981 | 1.764127  |
| 30               | 8                | 0              | 5.587322                | 0.049942  | 0.193406  |
| 31               | 6                | 0              | 6.209490                | -1.188824 | 0.460021  |
| 32               | 1                | 0              | 6.020171                | -1.908384 | -0.342971 |
| 33               | 1                | 0              | 7.276276                | -0.984955 | 0.518070  |
| 34               | 1                | 0              | 5.865624                | -1.606116 | 1.411829  |

## Structure 26f (CHCl<sub>3</sub>)

Energy (Hartrees): -823.799919847

No imaginary frequencies

Standard orientation:

| Center<br>Number | Atomic<br>Number | Atomic<br>Type | Coordinates (Angstroms) |           |           |
|------------------|------------------|----------------|-------------------------|-----------|-----------|
|                  |                  |                | X                       | Y         | Z         |
| 1                | 6                | 0              | 2.281989                | 1.412726  | -0.357578 |
| 2                | 6                | 0              | 3.653336                | 1.304712  | -0.213026 |
| 3                | 6                | 0              | 4.235165                | 0.069645  | 0.089589  |
| 4                | 6                | 0              | 3.422483                | -1.050039 | 0.251307  |
| 5                | 6                | 0              | 2.039959                | -0.919779 | 0.119442  |
| 6                | 6                | 0              | 1.439110                | 0.300076  | -0.193965 |
| 7                | 1                | 0              | 1.858314                | 2.374359  | -0.627067 |
| 8                | 1                | 0              | 4.299202                | 2.165159  | -0.345450 |
| 9                | 1                | 0              | 3.842768                | -2.016563 | 0.496273  |
| 10               | 1                | 0              | 1.417315                | -1.792465 | 0.287760  |
| 11               | 6                | 0              | -0.030767               | 0.416514  | -0.359858 |
| 12               | 6                | 0              | -0.677830               | -0.544092 | -1.093114 |
| 13               | 6                | 0              | -0.672412               | 1.627323  | 0.137215  |
| 14               | 1                | 0              | -0.055185               | -1.231489 | -1.661743 |
| 15               | 1                | 0              | -0.025358               | 2.265183  | 0.767023  |
| 16               | 8                | 0              | -1.808726               | 1.987824  | -0.114932 |
| 17               | 7                | 0              | -1.998318               | -0.788846 | -1.271601 |
| 18               | 1                | 0              | -2.205111               | -1.407264 | -2.045047 |
| 19               | 6                | 0              | -3.106490               | -0.542302 | -0.435056 |
| 20               | 6                | 0              | -2.976253               | -0.350543 | 0.939770  |
| 21               | 6                | 0              | -4.376952               | -0.579730 | -1.012868 |
| 22               | 6                | 0              | -4.113374               | -0.191674 | 1.722307  |
| 23               | 1                | 0              | -1.994253               | -0.337793 | 1.395527  |
| 24               | 6                | 0              | -5.506967               | -0.419042 | -0.222338 |
| 25               | 1                | 0              | -4.470216               | -0.731043 | -2.083284 |
| 26               | 6                | 0              | -5.381819               | -0.219528 | 1.149888  |
| 27               | 1                | 0              | -4.003025               | -0.042770 | 2.790464  |
| 28               | 1                | 0              | -6.487846               | -0.445298 | -0.682952 |
| 29               | 1                | 0              | -6.263262               | -0.087028 | 1.765871  |
| 30               | 8                | 0              | 5.587598                | 0.060561  | 0.209209  |
| 31               | 6                | 0              | 6.214186                | -1.171706 | 0.524250  |
| 32               | 1                | 0              | 6.034706                | -1.917554 | -0.255841 |
| 33               | 1                | 0              | 7.280487                | -0.960916 | 0.580829  |
| 34               | 1                | 0              | 5.868530                | -1.555048 | 1.488833  |

## Structure 26f (DMSO)

Energy (Hartrees): -823.799638739

No imaginary frequencies

Standard orientation:

| Center<br>Number | Atomic<br>Number | Atomic<br>Type | Coordinates (Angstroms) |           |           |
|------------------|------------------|----------------|-------------------------|-----------|-----------|
|                  |                  |                | X                       | Y         | Z         |
| 1                | 6                | 0              | 2.279399                | 1.412559  | -0.362419 |
| 2                | 6                | 0              | 3.650868                | 1.305658  | -0.211579 |
| 3                | 6                | 0              | 4.233362                | 0.072036  | 0.098173  |
| 4                | 6                | 0              | 3.419439                | -1.048028 | 0.259763  |
| 5                | 6                | 0              | 2.037409                | -0.919264 | 0.120950  |
| 6                | 6                | 0              | 1.436471                | 0.299567  | -0.199470 |
| 7                | 1                | 0              | 1.857526                | 2.374232  | -0.635129 |
| 8                | 1                | 0              | 4.293824                | 2.168400  | -0.344804 |
| 9                | 1                | 0              | 3.838566                | -2.014313 | 0.508362  |
| 10               | 1                | 0              | 1.415574                | -1.793434 | 0.285013  |
| 11               | 6                | 0              | -0.032644               | 0.413457  | -0.373143 |
| 12               | 6                | 0              | -0.677965               | -0.567763 | -1.082549 |
| 13               | 6                | 0              | -0.671324               | 1.636858  | 0.092091  |
| 14               | 1                | 0              | -0.057188               | -1.270886 | -1.633439 |
| 15               | 1                | 0              | -0.029488               | 2.278578  | 0.722860  |
| 16               | 8                | 0              | -1.799295               | 2.008054  | -0.186316 |
| 17               | 7                | 0              | -1.996911               | -0.818821 | -1.252424 |
| 18               | 1                | 0              | -2.202980               | -1.463311 | -2.006376 |
| 19               | 6                | 0              | -3.102444               | -0.551499 | -0.421246 |
| 20               | 6                | 0              | -2.971425               | -0.312312 | 0.946987  |
| 21               | 6                | 0              | -4.374902               | -0.621771 | -0.994064 |
| 22               | 6                | 0              | -4.109080               | -0.139992 | 1.727049  |
| 23               | 1                | 0              | -1.989594               | -0.276200 | 1.402406  |
| 24               | 6                | 0              | -5.505041               | -0.444829 | -0.206259 |
| 25               | 1                | 0              | -4.467388               | -0.818100 | -2.057365 |
| 26               | 6                | 0              | -5.379197               | -0.198834 | 1.159173  |
| 27               | 1                | 0              | -3.997741               | 0.041097  | 2.790335  |
| 28               | 1                | 0              | -6.486819               | -0.500693 | -0.662848 |
| 29               | 1                | 0              | -6.260662               | -0.057738 | 1.773544  |
| 30               | 8                | 0              | 5.583837                | 0.062372  | 0.222724  |
| 31               | 6                | 0              | 6.206126                | -1.176799 | 0.530841  |
| 32               | 1                | 0              | 6.019023                | -1.917608 | -0.251776 |
| 33               | 1                | 0              | 7.273757                | -0.972313 | 0.585111  |
| 34               | 1                | 0              | 5.861327                | -1.563642 | 1.494014  |

## Structure 26f (C<sub>2</sub>H<sub>5</sub>OH)

Energy (Hartrees): -823.803228661

No imaginary frequencies

Standard orientation:

| Center<br>Number | Atomic<br>Number | Atomic<br>Type | Coordinates (Angstroms) |           |           |
|------------------|------------------|----------------|-------------------------|-----------|-----------|
|                  |                  |                | X                       | Y         | Z         |
| 1                | 6                | 0              | 2.280327                | 1.425278  | -0.347234 |
| 2                | 6                | 0              | 3.651086                | 1.311411  | -0.193629 |
| 3                | 6                | 0              | 4.225338                | 0.071798  | 0.102632  |
| 4                | 6                | 0              | 3.409868                | -1.047477 | 0.250970  |
| 5                | 6                | 0              | 2.028840                | -0.911542 | 0.111355  |
| 6                | 6                | 0              | 1.434281                | 0.313405  | -0.197371 |
| 7                | 1                | 0              | 1.862566                | 2.391023  | -0.611750 |
| 8                | 1                | 0              | 4.299259                | 2.172202  | -0.315646 |
| 9                | 1                | 0              | 3.826171                | -2.017516 | 0.489486  |
| 10               | 1                | 0              | 1.402555                | -1.784511 | 0.265483  |
| 11               | 6                | 0              | -0.034881               | 0.429846  | -0.371629 |
| 12               | 6                | 0              | -0.676423               | -0.545385 | -1.099788 |
| 13               | 6                | 0              | -0.676558               | 1.637317  | 0.103986  |
| 14               | 1                | 0              | -0.050863               | -1.225668 | -1.673444 |
| 15               | 1                | 0              | -0.039966               | 2.286509  | 0.729326  |
| 16               | 8                | 0              | -1.818368               | 1.998924  | -0.160854 |
| 17               | 7                | 0              | -1.989327               | -0.810758 | -1.262507 |
| 18               | 1                | 0              | -2.194378               | -1.446379 | -2.024663 |
| 19               | 6                | 0              | -3.096522               | -0.554778 | -0.425645 |
| 20               | 6                | 0              | -2.961886               | -0.344192 | 0.946418  |
| 21               | 6                | 0              | -4.367821               | -0.604271 | -1.000920 |
| 22               | 6                | 0              | -4.097899               | -0.174720 | 1.729501  |
| 23               | 1                | 0              | -1.978959               | -0.326441 | 1.401355  |
| 24               | 6                | 0              | -5.496342               | -0.432246 | -0.209616 |
| 25               | 1                | 0              | -4.461980               | -0.778856 | -2.067823 |
| 26               | 6                | 0              | -5.367807               | -0.211760 | 1.159604  |
| 27               | 1                | 0              | -3.985303               | -0.012716 | 2.795717  |
| 28               | 1                | 0              | -6.478662               | -0.470021 | -0.666827 |
| 29               | 1                | 0              | -6.248142               | -0.072385 | 1.776136  |
| 30               | 8                | 0              | 5.580888                | 0.055101  | 0.229418  |
| 31               | 6                | 0              | 6.202313                | -1.191959 | 0.513928  |
| 32               | 1                | 0              | 6.008996                | -1.915570 | -0.282686 |
| 33               | 1                | 0              | 7.270208                | -0.988685 | 0.567584  |
| 34               | 1                | 0              | 5.858127                | -1.592235 | 1.471420  |

## Structure 26g (vacuum)

Energy (Hartrees): -823.78286338

No imaginary frequencies

Standard orientation:

| Center<br>Number | Atomic<br>Number | Atomic<br>Type | Coordinates (Angstroms) |           |           |
|------------------|------------------|----------------|-------------------------|-----------|-----------|
|                  |                  |                | X                       | Y         | Z         |
| 1                | 6                | 0              | -1.917891               | -0.467806 | -0.733354 |
| 2                | 6                | 0              | -3.200494               | -1.011619 | -0.691717 |
| 3                | 6                | 0              | -4.169862               | -0.423801 | 0.117884  |
| 4                | 6                | 0              | -3.838673               | 0.694502  | 0.886828  |
| 5                | 6                | 0              | -2.556602               | 1.210700  | 0.846920  |
| 6                | 6                | 0              | -1.569173               | 0.646864  | 0.026791  |
| 7                | 1                | 0              | -1.183683               | -0.914950 | -1.395546 |
| 8                | 1                | 0              | -3.428211               | -1.875269 | -1.301863 |
| 9                | 1                | 0              | -4.602050               | 1.127949  | 1.521211  |
| 10               | 1                | 0              | -2.304791               | 2.057053  | 1.476804  |
| 11               | 6                | 0              | -0.204335               | 1.219403  | -0.032995 |
| 12               | 6                | 0              | -0.018493               | 2.566139  | -0.125560 |
| 13               | 6                | 0              | 0.947852                | 0.343699  | -0.001924 |
| 14               | 1                | 0              | -0.864242               | 3.246541  | -0.176896 |
| 15               | 1                | 0              | 0.759464                | -0.731821 | 0.087636  |
| 16               | 8                | 0              | 1.151354                | 3.170204  | -0.179569 |
| 17               | 1                | 0              | 1.849297                | 2.454774  | -0.156751 |
| 18               | 7                | 0              | 2.151644                | 0.794789  | -0.076337 |
| 19               | 6                | 0              | 3.245717                | -0.089044 | 0.018819  |
| 20               | 6                | 0              | 3.264121                | -1.176354 | 0.897256  |
| 21               | 6                | 0              | 4.366395                | 0.171368  | -0.773411 |
| 22               | 6                | 0              | 4.376276                | -2.009164 | 0.949611  |
| 23               | 1                | 0              | 2.423574                | -1.347892 | 1.559942  |
| 24               | 6                | 0              | 5.470231                | -0.667726 | -0.720523 |
| 25               | 1                | 0              | 4.347642                | 1.030905  | -1.432981 |
| 26               | 6                | 0              | 5.479231                | -1.763645 | 0.138834  |
| 27               | 1                | 0              | 4.384980                | -2.845908 | 1.638243  |
| 28               | 1                | 0              | 6.329672                | -0.462107 | -1.347716 |
| 29               | 1                | 0              | 6.345138                | -2.412782 | 0.185307  |
| 30               | 8                | 0              | -5.450148               | -0.863815 | 0.229765  |
| 31               | 6                | 0              | -5.825382               | -1.992345 | -0.530872 |
| 32               | 1                | 0              | -5.233906               | -2.870910 | -0.254085 |
| 33               | 1                | 0              | -6.872936               | -2.175791 | -0.302934 |
| 34               | 1                | 0              | -5.714616               | -1.801441 | -1.603097 |



## Structure 26g (CHCl<sub>3</sub>)

Energy (Hartrees): -823.80509819

No imaginary frequencies

Standard orientation:

| Center<br>Number | Atomic<br>Number | Atomic<br>Type | Coordinates (Angstroms) |           |           |
|------------------|------------------|----------------|-------------------------|-----------|-----------|
|                  |                  |                | X                       | Y         | Z         |
| 1                | 6                | 0              | -1.922148               | -0.484888 | -0.715198 |
| 2                | 6                | 0              | -3.207783               | -1.022274 | -0.671317 |
| 3                | 6                | 0              | -4.178925               | -0.417340 | 0.125116  |
| 4                | 6                | 0              | -3.845613               | 0.710998  | 0.880122  |
| 5                | 6                | 0              | -2.560469               | 1.222970  | 0.837084  |
| 6                | 6                | 0              | -1.572666               | 0.642493  | 0.028139  |
| 7                | 1                | 0              | -1.187197               | -0.949883 | -1.364613 |
| 8                | 1                | 0              | -3.437181               | -1.895122 | -1.268273 |
| 9                | 1                | 0              | -4.606947               | 1.161880  | 1.506311  |
| 10               | 1                | 0              | -2.311049               | 2.081504  | 1.452121  |
| 11               | 6                | 0              | -0.204934               | 1.210961  | -0.037597 |
| 12               | 6                | 0              | -0.017009               | 2.557242  | -0.124392 |
| 13               | 6                | 0              | 0.944524                | 0.329307  | -0.012452 |
| 14               | 1                | 0              | -0.856320               | 3.246145  | -0.169684 |
| 15               | 1                | 0              | 0.753337                | -0.745206 | 0.068116  |
| 16               | 8                | 0              | 1.161908                | 3.152793  | -0.178503 |
| 17               | 1                | 0              | 1.854760                | 2.427485  | -0.158609 |
| 18               | 7                | 0              | 2.148660                | 0.782730  | -0.081389 |
| 19               | 6                | 0              | 3.248410                | -0.095624 | 0.013510  |
| 20               | 6                | 0              | 3.254437                | -1.211862 | 0.856810  |
| 21               | 6                | 0              | 4.388287                | 0.204278  | -0.738111 |
| 22               | 6                | 0              | 4.374956                | -2.034093 | 0.912260  |
| 23               | 1                | 0              | 2.395320                | -1.420515 | 1.484802  |
| 24               | 6                | 0              | 5.501107                | -0.624693 | -0.681512 |
| 25               | 1                | 0              | 4.380214                | 1.084648  | -1.371167 |
| 26               | 6                | 0              | 5.499061                | -1.748528 | 0.142315  |
| 27               | 1                | 0              | 4.373564                | -2.894489 | 1.572036  |
| 28               | 1                | 0              | 6.375660                | -0.388342 | -1.277067 |
| 29               | 1                | 0              | 6.371284                | -2.389879 | 0.191352  |
| 30               | 8                | 0              | -5.460921               | -0.851137 | 0.234093  |
| 31               | 6                | 0              | -5.845015               | -1.975947 | -0.539731 |
| 32               | 1                | 0              | -5.271289               | -2.864075 | -0.258340 |
| 33               | 1                | 0              | -6.898118               | -2.145309 | -0.323211 |
| 34               | 1                | 0              | -5.721862               | -1.779190 | -1.609037 |

## Structure 26g (DMSO)

Energy (Hartrees): -823.80209392

No imaginary frequencies

Standard orientation:

| Center<br>Number | Atomic<br>Number | Atomic<br>Type | Coordinates (Angstroms) |           |           |
|------------------|------------------|----------------|-------------------------|-----------|-----------|
|                  |                  |                | X                       | Y         | Z         |
| 1                | 6                | 0              | -1.920461               | -0.500536 | -0.695928 |
| 2                | 6                | 0              | -3.207942               | -1.034153 | -0.652924 |
| 3                | 6                | 0              | -4.185638               | -0.411848 | 0.123154  |
| 4                | 6                | 0              | -3.855928               | 0.732539  | 0.856809  |
| 5                | 6                | 0              | -2.569267               | 1.242151  | 0.813931  |
| 6                | 6                | 0              | -1.575004               | 0.641548  | 0.027467  |
| 7                | 1                | 0              | -1.180592               | -0.984111 | -1.325914 |
| 8                | 1                | 0              | -3.432122               | -1.919128 | -1.233973 |
| 9                | 1                | 0              | -4.619708               | 1.201071  | 1.467252  |
| 10               | 1                | 0              | -2.325178               | 2.114926  | 1.410962  |
| 11               | 6                | 0              | -0.205564               | 1.205918  | -0.036609 |
| 12               | 6                | 0              | -0.013915               | 2.552689  | -0.122296 |
| 13               | 6                | 0              | 0.941613                | 0.321921  | -0.010719 |
| 14               | 1                | 0              | -0.851034               | 3.244616  | -0.165727 |
| 15               | 1                | 0              | 0.751683                | -0.752419 | 0.067009  |
| 16               | 8                | 0              | 1.168240                | 3.140881  | -0.176701 |
| 17               | 1                | 0              | 1.853305                | 2.404997  | -0.158050 |
| 18               | 7                | 0              | 2.146063                | 0.778517  | -0.076076 |
| 19               | 6                | 0              | 3.248472                | -0.097057 | 0.015485  |
| 20               | 6                | 0              | 3.252220                | -1.227100 | 0.841009  |
| 21               | 6                | 0              | 4.393088                | 0.219667  | -0.722521 |
| 22               | 6                | 0              | 4.377548                | -2.043278 | 0.894153  |
| 23               | 1                | 0              | 2.387874                | -1.452751 | 1.455873  |
| 24               | 6                | 0              | 5.510925                | -0.603494 | -0.667937 |
| 25               | 1                | 0              | 4.387560                | 1.109151  | -1.343198 |
| 26               | 6                | 0              | 5.507227                | -1.740467 | 0.138021  |
| 27               | 1                | 0              | 4.373929                | -2.914744 | 1.539485  |
| 28               | 1                | 0              | 6.389227                | -0.353894 | -1.252719 |
| 29               | 1                | 0              | 6.382210                | -2.378446 | 0.185073  |
| 30               | 8                | 0              | -5.466870               | -0.843115 | 0.230302  |
| 31               | 6                | 0              | -5.842936               | -1.981420 | -0.531748 |
| 32               | 1                | 0              | -5.270706               | -2.864628 | -0.233177 |
| 33               | 1                | 0              | -6.897898               | -2.149002 | -0.323176 |
| 34               | 1                | 0              | -5.708581               | -1.799858 | -1.602082 |

## Structure 26g (C<sub>2</sub>H<sub>5</sub>OH)

Energy (Hartrees): -823.81571433

No imaginary frequencies

Standard orientation:

| Center<br>Number | Atomic<br>Number | Atomic<br>Type | Coordinates (Angstroms) |           |           |
|------------------|------------------|----------------|-------------------------|-----------|-----------|
|                  |                  |                | X                       | Y         | Z         |
| 1                | 6                | 0              | -1.913554               | -0.492671 | -0.700888 |
| 2                | 6                | 0              | -3.198389               | -1.032173 | -0.658154 |
| 3                | 6                | 0              | -4.174787               | -0.417033 | 0.123341  |
| 4                | 6                | 0              | -3.851062               | 0.723768  | 0.863031  |
| 5                | 6                | 0              | -2.566452               | 1.239006  | 0.820820  |
| 6                | 6                | 0              | -1.572229               | 0.646984  | 0.028482  |
| 7                | 1                | 0              | -1.172954               | -0.968648 | -1.335958 |
| 8                | 1                | 0              | -3.420985               | -1.914909 | -1.243215 |
| 9                | 1                | 0              | -4.616667               | 1.185100  | 1.477010  |
| 10               | 1                | 0              | -2.324767               | 2.108993  | 1.422889  |
| 11               | 6                | 0              | -0.204863               | 1.217042  | -0.036439 |
| 12               | 6                | 0              | -0.021124               | 2.562296  | -0.122379 |
| 13               | 6                | 0              | 0.944490                | 0.332718  | -0.010828 |
| 14               | 1                | 0              | -0.858746               | 3.253001  | -0.166096 |
| 15               | 1                | 0              | 0.752682                | -0.741150 | 0.070494  |
| 16               | 8                | 0              | 1.163089                | 3.159703  | -0.176898 |
| 17               | 1                | 0              | 1.857495                | 2.435219  | -0.159657 |
| 18               | 7                | 0              | 2.148248                | 0.786697  | -0.079962 |
| 19               | 6                | 0              | 3.246219                | -0.095320 | 0.013604  |
| 20               | 6                | 0              | 3.249734                | -1.210359 | 0.858712  |
| 21               | 6                | 0              | 4.385287                | 0.200175  | -0.741064 |
| 22               | 6                | 0              | 4.369193                | -2.034389 | 0.915071  |
| 23               | 1                | 0              | 2.390025                | -1.417017 | 1.486873  |
| 24               | 6                | 0              | 5.496919                | -0.631167 | -0.683906 |
| 25               | 1                | 0              | 4.380821                | 1.079283  | -1.376394 |
| 26               | 6                | 0              | 5.492988                | -1.753638 | 0.142098  |
| 27               | 1                | 0              | 4.365958                | -2.893906 | 1.576346  |
| 28               | 1                | 0              | 6.371296                | -0.398285 | -1.281487 |
| 29               | 1                | 0              | 6.363763                | -2.397340 | 0.191685  |
| 30               | 8                | 0              | -5.459312               | -0.856086 | 0.230626  |
| 31               | 6                | 0              | -5.833914               | -1.992928 | -0.537670 |
| 32               | 1                | 0              | -5.257632               | -2.873905 | -0.241668 |
| 33               | 1                | 0              | -6.888165               | -2.163189 | -0.327537 |
| 34               | 1                | 0              | -5.700822               | -1.802934 | -1.606362 |

## Structure 27a (vacuum)

Energy (Hartrees): -938.302373751

No imaginary frequencies

Standard orientation:

| Center<br>Number | Atomic<br>Number | Atomic<br>Type | Coordinates (Angstroms) |           |           |
|------------------|------------------|----------------|-------------------------|-----------|-----------|
|                  |                  |                | X                       | Y         | Z         |
| 1                | 6                | 0              | -3.479855               | 0.925267  | 0.621016  |
| 2                | 6                | 0              | -4.694460               | 0.245758  | 0.698027  |
| 3                | 6                | 0              | -4.859103               | -0.948454 | 0.000721  |
| 4                | 6                | 0              | -3.808809               | -1.440474 | -0.777697 |
| 5                | 6                | 0              | -2.617883               | -0.742569 | -0.859067 |
| 6                | 6                | 0              | -2.420450               | 0.453180  | -0.152464 |
| 7                | 1                | 0              | -3.355178               | 1.834346  | 1.199555  |
| 8                | 1                | 0              | -5.486792               | 0.649780  | 1.313438  |
| 9                | 1                | 0              | -3.961997               | -2.363107 | -1.324093 |
| 10               | 1                | 0              | -1.828000               | -1.116807 | -1.501869 |
| 11               | 6                | 0              | -1.139309               | 1.191297  | -0.222500 |
| 12               | 6                | 0              | 0.055564                | 0.521696  | -0.131793 |
| 13               | 6                | 0              | -1.151006               | 2.630522  | -0.383894 |
| 14               | 1                | 0              | 0.048536                | -0.553933 | 0.020559  |
| 15               | 1                | 0              | -2.149011               | 3.088965  | -0.502247 |
| 16               | 8                | 0              | -0.155543               | 3.345416  | -0.409396 |
| 17               | 7                | 0              | 1.271714                | 1.090372  | -0.183389 |
| 18               | 1                | 0              | 1.272970                | 2.106836  | -0.247746 |
| 19               | 6                | 0              | 2.498616                | 0.403704  | -0.109123 |
| 20               | 6                | 0              | 3.614556                | 1.069832  | 0.384704  |
| 21               | 6                | 0              | 2.635900                | -0.919965 | -0.539413 |
| 22               | 6                | 0              | 4.850724                | 0.435298  | 0.465453  |
| 23               | 1                | 0              | 3.515845                | 2.096027  | 0.720585  |
| 24               | 6                | 0              | 3.857226                | -1.561299 | -0.443527 |
| 25               | 1                | 0              | 1.794673                | -1.444305 | -0.976119 |
| 26               | 6                | 0              | 4.974697                | -0.891599 | 0.059112  |
| 27               | 1                | 0              | 5.696792                | 0.985120  | 0.854450  |
| 28               | 1                | 0              | 3.977053                | -2.584645 | -0.776746 |
| 29               | 8                | 0              | -5.993109               | -1.697666 | 0.011341  |
| 30               | 6                | 0              | -7.084513               | -1.223790 | 0.770629  |
| 31               | 1                | 0              | -7.880593               | -1.953838 | 0.642446  |
| 32               | 1                | 0              | -6.826793               | -1.150400 | 1.832114  |
| 33               | 1                | 0              | -7.424098               | -0.247722 | 0.409532  |
| 34               | 8                | 0              | 6.128291                | -1.607800 | 0.102830  |
| 35               | 6                | 0              | 7.283325                | -0.960059 | 0.592284  |
| 36               | 1                | 0              | 7.148800                | -0.643751 | 1.631671  |
| 37               | 1                | 0              | 8.085533                | -1.692494 | 0.538214  |
| 38               | 1                | 0              | 7.541845                | -0.092345 | -0.023037 |

## Structure 27a (CHCl<sub>3</sub>)

Energy (Hartrees): -938.327778814

No imaginary frequencies

Standard orientation:

| Center<br>Number | Atomic<br>Number | Atomic<br>Type | Coordinates (Angstroms) |           |           |
|------------------|------------------|----------------|-------------------------|-----------|-----------|
|                  |                  |                | X                       | Y         | Z         |
| 1                | 6                | 0              | -3.478975               | 0.928495  | 0.611219  |
| 2                | 6                | 0              | -4.690069               | 0.242906  | 0.697481  |
| 3                | 6                | 0              | -4.854481               | -0.951627 | -0.001088 |
| 4                | 6                | 0              | -3.808204               | -1.434924 | -0.792038 |
| 5                | 6                | 0              | -2.619266               | -0.731689 | -0.881418 |
| 6                | 6                | 0              | -2.421973               | 0.463316  | -0.172434 |
| 7                | 1                | 0              | -3.356576               | 1.837977  | 1.190111  |
| 8                | 1                | 0              | -5.479220               | 0.641336  | 1.321308  |
| 9                | 1                | 0              | -3.955179               | -2.358874 | -1.339748 |
| 10               | 1                | 0              | -1.830819               | -1.107466 | -1.525531 |
| 11               | 6                | 0              | -1.140697               | 1.205977  | -0.239756 |
| 12               | 6                | 0              | 0.058021                | 0.530160  | -0.173460 |
| 13               | 6                | 0              | -1.160861               | 2.641606  | -0.367695 |
| 14               | 1                | 0              | 0.050102                | -0.549648 | -0.054354 |
| 15               | 1                | 0              | -2.159369               | 3.100016  | -0.470439 |
| 16               | 8                | 0              | -0.165634               | 3.367257  | -0.385440 |
| 17               | 7                | 0              | 1.271676                | 1.095780  | -0.211566 |
| 18               | 1                | 0              | 1.288482                | 2.113223  | -0.240227 |
| 19               | 6                | 0              | 2.500128                | 0.405285  | -0.136067 |
| 20               | 6                | 0              | 3.600422                | 1.055894  | 0.412283  |
| 21               | 6                | 0              | 2.648088                | -0.900915 | -0.612568 |
| 22               | 6                | 0              | 4.835269                | 0.419638  | 0.504239  |
| 23               | 1                | 0              | 3.491121                | 2.070252  | 0.780852  |
| 24               | 6                | 0              | 3.869306                | -1.543691 | -0.508338 |
| 25               | 1                | 0              | 1.818686                | -1.411781 | -1.087552 |
| 26               | 6                | 0              | 4.971639                | -0.891973 | 0.051310  |
| 27               | 1                | 0              | 5.669433                | 0.953675  | 0.939315  |
| 28               | 1                | 0              | 3.994129                | -2.555146 | -0.876725 |
| 29               | 8                | 0              | -5.983602               | -1.706966 | 0.022543  |
| 30               | 6                | 0              | -7.057282               | -1.262815 | 0.835039  |
| 31               | 1                | 0              | -7.844651               | -2.006590 | 0.726634  |
| 32               | 1                | 0              | -6.758560               | -1.203314 | 1.886009  |
| 33               | 1                | 0              | -7.430363               | -0.289991 | 0.501291  |
| 34               | 8                | 0              | 6.125052                | -1.606241 | 0.102676  |
| 35               | 6                | 0              | 7.264209                | -0.979583 | 0.669527  |
| 36               | 1                | 0              | 7.087236                | -0.713684 | 1.716107  |
| 37               | 1                | 0              | 8.067608                | -1.711842 | 0.614979  |
| 38               | 1                | 0              | 7.548035                | -0.087362 | 0.103289  |

## Structure 27a (DMSO)

Energy (Hartrees): -938.326416165

No imaginary frequencies

Standard orientation:

| Center<br>Number | Atomic<br>Number | Atomic<br>Type | Coordinates (Angstroms) |           |           |
|------------------|------------------|----------------|-------------------------|-----------|-----------|
|                  |                  |                | X                       | Y         | Z         |
| 1                | 6                | 0              | -3.492059               | 0.943252  | 0.585683  |
| 2                | 6                | 0              | -4.702972               | 0.256456  | 0.671282  |
| 3                | 6                | 0              | -4.856368               | -0.954371 | -0.002837 |
| 4                | 6                | 0              | -3.795827               | -1.453549 | -0.765884 |
| 5                | 6                | 0              | -2.606311               | -0.750110 | -0.854495 |
| 6                | 6                | 0              | -2.422284               | 0.462906  | -0.172062 |
| 7                | 1                | 0              | -3.382714               | 1.866742  | 1.144861  |
| 8                | 1                | 0              | -5.500716               | 0.668253  | 1.275468  |
| 9                | 1                | 0              | -3.927955               | -2.391274 | -1.293939 |
| 10               | 1                | 0              | -1.806225               | -1.143574 | -1.473322 |
| 11               | 6                | 0              | -1.140994               | 1.205577  | -0.237136 |
| 12               | 6                | 0              | 0.056550                | 0.525076  | -0.178299 |
| 13               | 6                | 0              | -1.162826               | 2.641759  | -0.356400 |
| 14               | 1                | 0              | 0.044478                | -0.556005 | -0.073033 |
| 15               | 1                | 0              | -2.162020               | 3.098142  | -0.460225 |
| 16               | 8                | 0              | -0.169532               | 3.370619  | -0.366798 |
| 17               | 7                | 0              | 1.271023                | 1.087515  | -0.213028 |
| 18               | 1                | 0              | 1.296401                | 2.104839  | -0.230442 |
| 19               | 6                | 0              | 2.499402                | 0.396440  | -0.140631 |
| 20               | 6                | 0              | 3.604623                | 1.061267  | 0.380922  |
| 21               | 6                | 0              | 2.643861                | -0.919243 | -0.591944 |
| 22               | 6                | 0              | 4.841966                | 0.429965  | 0.474295  |
| 23               | 1                | 0              | 3.496727                | 2.084111  | 0.726460  |
| 24               | 6                | 0              | 3.868973                | -1.556154 | -0.487276 |
| 25               | 1                | 0              | 1.810792                | -1.444857 | -1.044014 |
| 26               | 6                | 0              | 4.976751                | -0.891180 | 0.047148  |
| 27               | 1                | 0              | 5.679263                | 0.976216  | 0.887934  |
| 28               | 1                | 0              | 3.988494                | -2.575346 | -0.836349 |
| 29               | 8                | 0              | -5.984541               | -1.708346 | 0.021681  |
| 30               | 6                | 0              | -7.061481               | -1.251067 | 0.826633  |
| 31               | 1                | 0              | -7.849113               | -1.995896 | 0.728753  |
| 32               | 1                | 0              | -6.763508               | -1.174762 | 1.876501  |
| 33               | 1                | 0              | -7.433579               | -0.282940 | 0.479063  |
| 34               | 8                | 0              | 6.132152                | -1.599358 | 0.102169  |
| 35               | 6                | 0              | 7.264386                | -0.962854 | 0.677625  |
| 36               | 1                | 0              | 7.071355                | -0.685449 | 1.718076  |
| 37               | 1                | 0              | 8.070355                | -1.693369 | 0.642224  |
| 38               | 1                | 0              | 7.553808                | -0.075766 | 0.107033  |

## Structure 27a (C<sub>2</sub>H<sub>5</sub>OH)

Energy (Hartrees): -938.329178386

No imaginary frequencies

Standard orientation:

| Center<br>Number | Atomic<br>Number | Atomic<br>Type | Coordinates (Angstroms) |           |           |
|------------------|------------------|----------------|-------------------------|-----------|-----------|
|                  |                  |                | X                       | Y         | Z         |
| 1                | 6                | 0              | -3.491428               | 0.941390  | 0.594627  |
| 2                | 6                | 0              | -4.699489               | 0.249378  | 0.676416  |
| 3                | 6                | 0              | -4.845048               | -0.957238 | -0.004559 |
| 4                | 6                | 0              | -3.785126               | -1.449698 | -0.770808 |
| 5                | 6                | 0              | -2.598573               | -0.740635 | -0.855885 |
| 6                | 6                | 0              | -2.420887               | 0.468867  | -0.166558 |
| 7                | 1                | 0              | -3.384939               | 1.862385  | 1.158486  |
| 8                | 1                | 0              | -5.499659               | 0.653357  | 1.282687  |
| 9                | 1                | 0              | -3.915212               | -2.385266 | -1.303654 |
| 10               | 1                | 0              | -1.797095               | -1.126070 | -1.478082 |
| 11               | 6                | 0              | -1.142557               | 1.217773  | -0.231413 |
| 12               | 6                | 0              | 0.058533                | 0.538777  | -0.161901 |
| 13               | 6                | 0              | -1.169665               | 2.645327  | -0.366162 |
| 14               | 1                | 0              | 0.045954                | -0.541387 | -0.047165 |
| 15               | 1                | 0              | -2.167416               | 3.101067  | -0.473632 |
| 16               | 8                | 0              | -0.173495               | 3.380896  | -0.386552 |
| 17               | 7                | 0              | 1.270470                | 1.099402  | -0.196402 |
| 18               | 1                | 0              | 1.299479                | 2.116597  | -0.220326 |
| 19               | 6                | 0              | 2.498140                | 0.403695  | -0.128111 |
| 20               | 6                | 0              | 3.603324                | 1.058514  | 0.405245  |
| 21               | 6                | 0              | 2.637631                | -0.904885 | -0.599428 |
| 22               | 6                | 0              | 4.838230                | 0.421751  | 0.491449  |
| 23               | 1                | 0              | 3.498093                | 2.076480  | 0.765602  |
| 24               | 6                | 0              | 3.860161                | -1.547567 | -0.502066 |
| 25               | 1                | 0              | 1.803579                | -1.418902 | -1.063093 |
| 26               | 6                | 0              | 4.966837                | -0.892289 | 0.044026  |
| 27               | 1                | 0              | 5.677188                | 0.957757  | 0.914999  |
| 28               | 1                | 0              | 3.978801                | -2.561628 | -0.866531 |
| 29               | 8                | 0              | -5.974467               | -1.719316 | 0.015902  |
| 30               | 6                | 0              | -7.057898               | -1.271907 | 0.820969  |
| 31               | 1                | 0              | -7.839080               | -2.022774 | 0.716920  |
| 32               | 1                | 0              | -6.760721               | -1.199086 | 1.870933  |
| 33               | 1                | 0              | -7.433433               | -0.305451 | 0.473559  |
| 34               | 8                | 0              | 6.124171                | -1.607373 | 0.088589  |
| 35               | 6                | 0              | 7.264183                | -0.982700 | 0.666128  |
| 36               | 1                | 0              | 7.076768                | -0.720019 | 1.711060  |
| 37               | 1                | 0              | 8.065435                | -1.717578 | 0.614603  |
| 38               | 1                | 0              | 7.551096                | -0.090274 | 0.103134  |

## Structure 27b (vacuum)

Energy (Hartrees): -938.297520617  
No imaginary frequencies

Standard orientation:

| Center<br>Number | Atomic<br>Number | Atomic<br>Type | Coordinates (Angstroms) |           |           |
|------------------|------------------|----------------|-------------------------|-----------|-----------|
|                  |                  |                | X                       | Y         | Z         |
| 1                | 6                | 0              | 3.258885                | 0.996789  | 0.984219  |
| 2                | 6                | 0              | 4.309898                | 0.100866  | 1.053363  |
| 3                | 6                | 0              | 4.395438                | -0.952882 | 0.139623  |
| 4                | 6                | 0              | 3.418885                | -1.090345 | -0.845382 |
| 5                | 6                | 0              | 2.371650                | -0.171958 | -0.907003 |
| 6                | 6                | 0              | 2.263655                | 0.880469  | 0.001887  |
| 7                | 1                | 0              | 3.194982                | 1.799570  | 1.711192  |
| 8                | 1                | 0              | 5.078390                | 0.189705  | 1.811520  |
| 9                | 1                | 0              | 3.466547                | -1.886857 | -1.575594 |
| 10               | 1                | 0              | 1.634272                | -0.267181 | -1.698148 |
| 11               | 6                | 0              | 1.153830                | 1.857815  | -0.065313 |
| 12               | 6                | 0              | -0.157794               | 1.504505  | -0.057526 |
| 13               | 6                | 0              | 1.453280                | 3.293077  | -0.108531 |
| 14               | 1                | 0              | -0.894186               | 2.300291  | -0.106204 |
| 15               | 1                | 0              | 2.534649                | 3.534226  | -0.126831 |
| 16               | 8                | 0              | 0.631126                | 4.183676  | -0.133713 |
| 17               | 8                | 0              | 5.457788                | -1.784785 | 0.288607  |
| 18               | 6                | 0              | 5.591229                | -2.850618 | -0.628230 |
| 19               | 1                | 0              | 5.702009                | -2.478968 | -1.651799 |
| 20               | 1                | 0              | 6.491823                | -3.387223 | -0.338938 |
| 21               | 1                | 0              | 4.732480                | -3.527577 | -0.576691 |
| 22               | 7                | 0              | -0.637117               | 0.243447  | 0.045004  |
| 23               | 1                | 0              | 0.038906                | -0.490572 | 0.213246  |
| 24               | 6                | 0              | -1.993890               | -0.128099 | 0.064080  |
| 25               | 6                | 0              | -2.346974               | -1.355860 | 0.635804  |
| 26               | 6                | 0              | -2.993284               | 0.672446  | -0.476341 |
| 27               | 6                | 0              | -3.666148               | -1.762021 | 0.674115  |
| 28               | 1                | 0              | -1.576618               | -1.989103 | 1.062958  |
| 29               | 6                | 0              | -4.328786               | 0.274973  | -0.421391 |
| 30               | 1                | 0              | -2.747392               | 1.608030  | -0.962341 |
| 31               | 6                | 0              | -4.672579               | -0.944217 | 0.154416  |
| 32               | 1                | 0              | -3.947292               | -2.709597 | 1.116551  |
| 33               | 1                | 0              | -5.080365               | 0.925963  | -0.846676 |
| 34               | 8                | 0              | -5.940417               | -1.424708 | 0.251698  |
| 35               | 6                | 0              | -6.983613               | -0.627251 | -0.266883 |
| 36               | 1                | 0              | -6.861185               | -0.466304 | -1.342859 |
| 37               | 1                | 0              | -7.903762               | -1.178149 | -0.086111 |
| 38               | 1                | 0              | -7.033507               | 0.340012  | 0.243526  |



## Structure 27b (CHCl<sub>3</sub>)

Energy (Hartrees): -938.324955991

No imaginary frequencies

Standard orientation:

| Center<br>Number | Atomic<br>Number | Atomic<br>Type | Coordinates (Angstroms) |           |           |
|------------------|------------------|----------------|-------------------------|-----------|-----------|
|                  |                  |                | X                       | Y         | Z         |
| 1                | 6                | 0              | 3.271307                | 1.015065  | 0.973481  |
| 2                | 6                | 0              | 4.329968                | 0.126853  | 1.049094  |
| 3                | 6                | 0              | 4.411380                | -0.946755 | 0.157278  |
| 4                | 6                | 0              | 3.422244                | -1.112909 | -0.812022 |
| 5                | 6                | 0              | 2.367284                | -0.203798 | -0.879490 |
| 6                | 6                | 0              | 2.264387                | 0.869791  | 0.006503  |
| 7                | 1                | 0              | 3.214186                | 1.835276  | 1.681971  |
| 8                | 1                | 0              | 5.105078                | 0.242393  | 1.798024  |
| 9                | 1                | 0              | 3.464257                | -1.927121 | -1.523427 |
| 10               | 1                | 0              | 1.620649                | -0.327395 | -1.658203 |
| 11               | 6                | 0              | 1.153222                | 1.847103  | -0.073668 |
| 12               | 6                | 0              | -0.166260               | 1.497066  | -0.076594 |
| 13               | 6                | 0              | 1.462041                | 3.269894  | -0.119743 |
| 14               | 1                | 0              | -0.899639               | 2.294408  | -0.137431 |
| 15               | 1                | 0              | 2.542955                | 3.504710  | -0.138324 |
| 16               | 8                | 0              | 0.649584                | 4.180619  | -0.149385 |
| 17               | 8                | 0              | 5.479962                | -1.769289 | 0.309631  |
| 18               | 6                | 0              | 5.635840                | -2.829476 | -0.619869 |
| 19               | 1                | 0              | 5.738016                | -2.445773 | -1.639286 |
| 20               | 1                | 0              | 6.549774                | -3.347076 | -0.335110 |
| 21               | 1                | 0              | 4.795167                | -3.527863 | -0.570038 |
| 22               | 7                | 0              | -0.652109               | 0.246251  | 0.022059  |
| 23               | 1                | 0              | 0.012380                | -0.502173 | 0.184487  |
| 24               | 6                | 0              | -2.011882               | -0.123146 | 0.040152  |
| 25               | 6                | 0              | -2.348691               | -1.377990 | 0.560876  |
| 26               | 6                | 0              | -3.022758               | 0.698607  | -0.447029 |
| 27               | 6                | 0              | -3.666933               | -1.789832 | 0.607008  |
| 28               | 1                | 0              | -1.565675               | -2.026982 | 0.939460  |
| 29               | 6                | 0              | -4.356050               | 0.292840  | -0.386643 |
| 30               | 1                | 0              | -2.794189               | 1.657951  | -0.894840 |
| 31               | 6                | 0              | -4.685431               | -0.952026 | 0.143252  |
| 32               | 1                | 0              | -3.931708               | -2.759610 | 1.011869  |
| 33               | 1                | 0              | -5.117905               | 0.958196  | -0.770664 |
| 34               | 8                | 0              | -5.950742               | -1.437053 | 0.243218  |
| 35               | 6                | 0              | -7.010796               | -0.603312 | -0.194180 |
| 36               | 1                | 0              | -6.928007               | -0.385877 | -1.263369 |
| 37               | 1                | 0              | -7.927424               | -1.160841 | -0.010731 |
| 38               | 1                | 0              | -7.036809               | 0.331958  | 0.373054  |

## Structure 27b (DMSO)

Energy (Hartrees): -938.324354927

No imaginary frequencies

Standard orientation:

| Center<br>Number | Atomic<br>Number | Atomic<br>Type | Coordinates (Angstroms) |           |           |
|------------------|------------------|----------------|-------------------------|-----------|-----------|
|                  |                  |                | X                       | Y         | Z         |
| 1                | 6                | 0              | 3.264809                | 1.008918  | 0.978998  |
| 2                | 6                | 0              | 4.318923                | 0.114603  | 1.058058  |
| 3                | 6                | 0              | 4.402371                | -0.956071 | 0.161828  |
| 4                | 6                | 0              | 3.418789                | -1.112672 | -0.815623 |
| 5                | 6                | 0              | 2.367671                | -0.199225 | -0.884803 |
| 6                | 6                | 0              | 2.263277                | 0.871231  | 0.005223  |
| 7                | 1                | 0              | 3.208979                | 1.827247  | 1.690058  |
| 8                | 1                | 0              | 5.088375                | 0.226647  | 1.813647  |
| 9                | 1                | 0              | 3.460010                | -1.924405 | -1.530056 |
| 10               | 1                | 0              | 1.622489                | -0.321688 | -1.665159 |
| 11               | 6                | 0              | 1.156011                | 1.853270  | -0.077940 |
| 12               | 6                | 0              | -0.166173               | 1.506512  | -0.089315 |
| 13               | 6                | 0              | 1.476998                | 3.272052  | -0.114429 |
| 14               | 1                | 0              | -0.899928               | 2.303321  | -0.155996 |
| 15               | 1                | 0              | 2.560899                | 3.494251  | -0.120947 |
| 16               | 8                | 0              | 0.677144                | 4.194841  | -0.146913 |
| 17               | 8                | 0              | 5.463777                | -1.784793 | 0.317083  |
| 18               | 6                | 0              | 5.616046                | -2.841285 | -0.620777 |
| 19               | 1                | 0              | 5.727831                | -2.450871 | -1.636415 |
| 20               | 1                | 0              | 6.523163                | -3.369718 | -0.333957 |
| 21               | 1                | 0              | 4.768119                | -3.531008 | -0.582412 |
| 22               | 7                | 0              | -0.652106               | 0.257270  | 0.007169  |
| 23               | 1                | 0              | 0.009604                | -0.495563 | 0.166239  |
| 24               | 6                | 0              | -2.011456               | -0.113387 | 0.031772  |
| 25               | 6                | 0              | -2.339420               | -1.373227 | 0.546948  |
| 26               | 6                | 0              | -3.029189               | 0.708438  | -0.441861 |
| 27               | 6                | 0              | -3.656395               | -1.789658 | 0.601188  |
| 28               | 1                | 0              | -1.550203               | -2.022552 | 0.912003  |
| 29               | 6                | 0              | -4.360798               | 0.296756  | -0.375120 |
| 30               | 1                | 0              | -2.808992               | 1.673231  | -0.882463 |
| 31               | 6                | 0              | -4.682295               | -0.953628 | 0.148848  |
| 32               | 1                | 0              | -3.910566               | -2.764344 | 1.001527  |
| 33               | 1                | 0              | -5.127553               | 0.961995  | -0.749838 |
| 34               | 8                | 0              | -5.944340               | -1.442790 | 0.252576  |
| 35               | 6                | 0              | -7.006225               | -0.610622 | -0.190300 |
| 36               | 1                | 0              | -6.914587               | -0.386895 | -1.257120 |
| 37               | 1                | 0              | -7.922155               | -1.172679 | -0.017836 |
| 38               | 1                | 0              | -7.041048               | 0.322027  | 0.380390  |

## Structure 27b (C<sub>2</sub>H<sub>5</sub>OH)

Energy (Hartrees): -938.327682027

No imaginary frequencies

Standard orientation:

| Center<br>Number | Atomic<br>Number | Atomic<br>Type | Coordinates (Angstroms) |           |           |
|------------------|------------------|----------------|-------------------------|-----------|-----------|
|                  |                  |                | X                       | Y         | Z         |
| 1                | 6                | 0              | 3.252893                | 1.000407  | 0.994194  |
| 2                | 6                | 0              | 4.309203                | 0.108319  | 1.071116  |
| 3                | 6                | 0              | 4.401508                | -0.949204 | 0.161868  |
| 4                | 6                | 0              | 3.428649                | -1.098691 | -0.825882 |
| 5                | 6                | 0              | 2.376183                | -0.186835 | -0.893651 |
| 6                | 6                | 0              | 2.262122                | 0.871954  | 0.008977  |
| 7                | 1                | 0              | 3.187386                | 1.809357  | 1.715115  |
| 8                | 1                | 0              | 5.072402                | 0.211900  | 1.834529  |
| 9                | 1                | 0              | 3.479477                | -1.901600 | -1.549684 |
| 10               | 1                | 0              | 1.639116                | -0.300384 | -1.682978 |
| 11               | 6                | 0              | 1.152523                | 1.852640  | -0.072564 |
| 12               | 6                | 0              | -0.171724               | 1.499182  | -0.084024 |
| 13               | 6                | 0              | 1.465952                | 3.263503  | -0.104821 |
| 14               | 1                | 0              | -0.911078               | 2.291201  | -0.146167 |
| 15               | 1                | 0              | 2.545407                | 3.496849  | -0.109173 |
| 16               | 8                | 0              | 0.657407                | 4.189723  | -0.136308 |
| 17               | 8                | 0              | 5.468898                | -1.779160 | 0.315835  |
| 18               | 6                | 0              | 5.636894                | -2.823139 | -0.635684 |
| 19               | 1                | 0              | 5.754539                | -2.416058 | -1.643658 |
| 20               | 1                | 0              | 6.545499                | -3.347951 | -0.346955 |
| 21               | 1                | 0              | 4.792920                | -3.517839 | -0.611055 |
| 22               | 7                | 0              | -0.649615               | 0.251004  | 0.007805  |
| 23               | 1                | 0              | 0.015696                | -0.500394 | 0.161362  |
| 24               | 6                | 0              | -2.010223               | -0.123415 | 0.027097  |
| 25               | 6                | 0              | -2.341585               | -1.367659 | 0.574320  |
| 26               | 6                | 0              | -3.020239               | 0.685177  | -0.483078 |
| 27               | 6                | 0              | -3.659832               | -1.780600 | 0.628921  |
| 28               | 1                | 0              | -1.556567               | -2.006393 | 0.965932  |
| 29               | 6                | 0              | -4.352733               | 0.278661  | -0.414963 |
| 30               | 1                | 0              | -2.792107               | 1.634017  | -0.953633 |
| 31               | 6                | 0              | -4.677733               | -0.954205 | 0.145024  |
| 32               | 1                | 0              | -3.920954               | -2.742193 | 1.056049  |
| 33               | 1                | 0              | -5.116028               | 0.932263  | -0.816172 |
| 34               | 8                | 0              | -5.946278               | -1.437734 | 0.255631  |
| 35               | 6                | 0              | -7.009634               | -0.603263 | -0.185950 |
| 36               | 1                | 0              | -6.931974               | -0.401805 | -1.257959 |
| 37               | 1                | 0              | -7.925995               | -1.155886 | 0.013003  |
| 38               | 1                | 0              | -7.023994               | 0.338272  | 0.370148  |

## Structure 27c (vacuum)

Energy (Hartrees): -938.298623435  
No imaginary frequencies

Standard orientation:

| Center<br>Number | Atomic<br>Number | Atomic<br>Type | Coordinates (Angstroms) |           |           |
|------------------|------------------|----------------|-------------------------|-----------|-----------|
|                  |                  |                | X                       | Y         | Z         |
| 1                | 6                | 0              | -3.238699               | 0.976675  | 0.922682  |
| 2                | 6                | 0              | -4.259080               | 0.048750  | 0.998162  |
| 3                | 6                | 0              | -4.284263               | -1.045037 | 0.127678  |
| 4                | 6                | 0              | -3.275161               | -1.194694 | -0.820789 |
| 5                | 6                | 0              | -2.250729               | -0.250000 | -0.884079 |
| 6                | 6                | 0              | -2.205626               | 0.839224  | -0.016268 |
| 7                | 1                | 0              | -3.239239               | 1.831885  | 1.586831  |
| 8                | 1                | 0              | -5.060359               | 0.150528  | 1.719701  |
| 9                | 1                | 0              | -3.277589               | -2.019669 | -1.520104 |
| 10               | 1                | 0              | -1.485670               | -0.356346 | -1.647128 |
| 11               | 6                | 0              | -1.115005               | 1.836550  | -0.086059 |
| 12               | 6                | 0              | 0.202436                | 1.505419  | -0.073610 |
| 13               | 6                | 0              | -1.410885               | 3.267793  | -0.105608 |
| 14               | 1                | 0              | 0.944818                | 2.296197  | -0.131487 |
| 15               | 8                | 0              | -5.328556               | -1.900013 | 0.277814  |
| 16               | 6                | 0              | -5.424211               | -2.984081 | -0.621319 |
| 17               | 1                | 0              | -4.559555               | -3.650114 | -0.534555 |
| 18               | 1                | 0              | -6.325808               | -3.526652 | -0.346345 |
| 19               | 1                | 0              | -5.511091               | -2.632866 | -1.654468 |
| 20               | 7                | 0              | 0.708470                | 0.253615  | 0.051177  |
| 21               | 1                | 0              | 0.049406                | -0.485881 | 0.258509  |
| 22               | 6                | 0              | 2.076154                | -0.075296 | 0.074415  |
| 23               | 6                | 0              | 2.490057                | -1.218366 | 0.768261  |
| 24               | 6                | 0              | 3.029984                | 0.692679  | -0.582865 |
| 25               | 6                | 0              | 3.824532                | -1.570334 | 0.811300  |
| 26               | 1                | 0              | 1.755192                | -1.823975 | 1.287561  |
| 27               | 6                | 0              | 4.381477                | 0.353651  | -0.523324 |
| 28               | 1                | 0              | 2.731833                | 1.553104  | -1.169328 |
| 29               | 6                | 0              | 4.785483                | -0.780756 | 0.173885  |
| 30               | 1                | 0              | 4.152908                | -2.451574 | 1.348312  |
| 31               | 1                | 0              | 5.097005                | 0.975980  | -1.042865 |
| 32               | 8                | 0              | -2.512180               | 3.763040  | -0.040297 |
| 33               | 1                | 0              | -0.511774               | 3.915422  | -0.182975 |
| 34               | 8                | 0              | 6.072620                | -1.202080 | 0.286267  |
| 35               | 6                | 0              | 7.072339                | -0.424087 | -0.336875 |
| 36               | 1                | 0              | 8.017195                | -0.918013 | -0.122364 |
| 37               | 1                | 0              | 6.922801                | -0.381861 | -1.420529 |
| 38               | 1                | 0              | 7.092757                | 0.592423  | 0.069203  |

## Structure 27c (CHCl<sub>3</sub>)

Energy (Hartrees): -938.327310149

No imaginary frequencies

Standard orientation:

| Center<br>Number | Atomic<br>Number | Atomic<br>Type | Coordinates (Angstroms) |           |           |
|------------------|------------------|----------------|-------------------------|-----------|-----------|
|                  |                  |                | X                       | Y         | Z         |
| 1                | 6                | 0              | -3.218069               | 0.942224  | 0.974210  |
| 2                | 6                | 0              | -4.249107               | 0.022680  | 1.038067  |
| 3                | 6                | 0              | -4.297137               | -1.044792 | 0.135231  |
| 4                | 6                | 0              | -3.297152               | -1.180480 | -0.826575 |
| 5                | 6                | 0              | -2.263605               | -0.244900 | -0.876465 |
| 6                | 6                | 0              | -2.200913               | 0.824757  | 0.015623  |
| 7                | 1                | 0              | -3.197459               | 1.771178  | 1.672336  |
| 8                | 1                | 0              | -5.036432               | 0.115129  | 1.777395  |
| 9                | 1                | 0              | -3.313707               | -1.989337 | -1.545191 |
| 10               | 1                | 0              | -1.503806               | -0.345499 | -1.645799 |
| 11               | 6                | 0              | -1.113125               | 1.828054  | -0.054689 |
| 12               | 6                | 0              | 0.213067                | 1.505466  | -0.027815 |
| 13               | 6                | 0              | -1.412303               | 3.245544  | -0.128676 |
| 14               | 1                | 0              | 0.945492                | 2.304339  | -0.098251 |
| 15               | 8                | 0              | -5.348956               | -1.892370 | 0.268446  |
| 16               | 6                | 0              | -5.486655               | -2.926993 | -0.691747 |
| 17               | 1                | 0              | -4.638332               | -3.617014 | -0.657277 |
| 18               | 1                | 0              | -6.395812               | -3.464170 | -0.428723 |
| 19               | 1                | 0              | -5.587123               | -2.515325 | -1.700469 |
| 20               | 7                | 0              | 0.722973                | 0.266612  | 0.114576  |
| 21               | 1                | 0              | 0.074921                | -0.488765 | 0.307624  |
| 22               | 6                | 0              | 2.093903                | -0.062175 | 0.116005  |
| 23               | 6                | 0              | 2.507752                | -1.219845 | 0.784577  |
| 24               | 6                | 0              | 3.042327                | 0.715714  | -0.538650 |
| 25               | 6                | 0              | 3.842598                | -1.577834 | 0.805978  |
| 26               | 1                | 0              | 1.773324                | -1.834127 | 1.294894  |
| 27               | 6                | 0              | 4.392527                | 0.368060  | -0.504145 |
| 28               | 1                | 0              | 2.743596                | 1.593173  | -1.099439 |
| 29               | 6                | 0              | 4.799053                | -0.781313 | 0.168833  |
| 30               | 1                | 0              | 4.168070                | -2.472815 | 1.323197  |
| 31               | 1                | 0              | 5.105195                | 0.995626  | -1.022121 |
| 32               | 8                | 0              | -2.525499               | 3.741179  | -0.141273 |
| 33               | 1                | 0              | -0.519403               | 3.899710  | -0.180951 |
| 34               | 8                | 0              | 6.086171                | -1.207911 | 0.253637  |
| 35               | 6                | 0              | 7.077620                | -0.441982 | -0.410243 |
| 36               | 1                | 0              | 8.022889                | -0.950236 | -0.229511 |
| 37               | 1                | 0              | 6.889026                | -0.401973 | -1.487381 |
| 38               | 1                | 0              | 7.130334                | 0.573517  | -0.005961 |

## Structure 27c (DMSO)

Energy (Hartrees): -938.327860739

No imaginary frequencies

Standard orientation:

| Center<br>Number | Atomic<br>Number | Atomic<br>Type | Coordinates (Angstroms) |           |           |
|------------------|------------------|----------------|-------------------------|-----------|-----------|
|                  |                  |                | X                       | Y         | Z         |
| 1                | 6                | 0              | -3.178053               | 0.926584  | 1.007228  |
| 2                | 6                | 0              | -4.198989               | -0.003029 | 1.095588  |
| 3                | 6                | 0              | -4.280655               | -1.050492 | 0.170410  |
| 4                | 6                | 0              | -3.326343               | -1.150939 | -0.841406 |
| 5                | 6                | 0              | -2.303637               | -0.204331 | -0.915968 |
| 6                | 6                | 0              | -2.205864               | 0.843035  | -0.000709 |
| 7                | 1                | 0              | -3.127181               | 1.732332  | 1.731010  |
| 8                | 1                | 0              | -4.947603               | 0.064400  | 1.876995  |
| 9                | 1                | 0              | -3.365990               | -1.944647 | -1.575899 |
| 10               | 1                | 0              | -1.575728               | -0.285793 | -1.717749 |
| 11               | 6                | 0              | -1.120959               | 1.849093  | -0.082026 |
| 12               | 6                | 0              | 0.208329                | 1.527949  | -0.086110 |
| 13               | 6                | 0              | -1.419266               | 3.265692  | -0.127892 |
| 14               | 1                | 0              | 0.934219                | 2.332863  | -0.146418 |
| 15               | 8                | 0              | -5.313347               | -1.913074 | 0.334000  |
| 16               | 6                | 0              | -5.458510               | -2.952207 | -0.624029 |
| 17               | 1                | 0              | -4.593035               | -3.620820 | -0.617209 |
| 18               | 1                | 0              | -6.346372               | -3.509890 | -0.332281 |
| 19               | 1                | 0              | -5.600471               | -2.542964 | -1.628423 |
| 20               | 7                | 0              | 0.719584                | 0.287856  | 0.006771  |
| 21               | 1                | 0              | 0.073182                | -0.479970 | 0.156784  |
| 22               | 6                | 0              | 2.088041                | -0.048917 | 0.032177  |
| 23               | 6                | 0              | 2.449612                | -1.299867 | 0.546241  |
| 24               | 6                | 0              | 3.083897                | 0.800142  | -0.440094 |
| 25               | 6                | 0              | 3.777484                | -1.680883 | 0.599854  |
| 26               | 1                | 0              | 1.678348                | -1.970744 | 0.910682  |
| 27               | 6                | 0              | 4.426035                | 0.424699  | -0.373305 |
| 28               | 1                | 0              | 2.839021                | 1.758948  | -0.880621 |
| 29               | 6                | 0              | 4.780906                | -0.817382 | 0.148580  |
| 30               | 1                | 0              | 4.057796                | -2.649178 | 0.998230  |
| 31               | 1                | 0              | 5.174166                | 1.111126  | -0.747528 |
| 32               | 8                | 0              | -2.532829               | 3.766100  | -0.127192 |
| 33               | 1                | 0              | -0.525622               | 3.917838  | -0.173095 |
| 34               | 8                | 0              | 6.055997                | -1.272450 | 0.250751  |
| 35               | 6                | 0              | 7.092960                | -0.417906 | -0.208475 |
| 36               | 1                | 0              | 8.023976                | -0.957727 | -0.046076 |
| 37               | 1                | 0              | 6.982021                | -0.200517 | -1.274773 |
| 38               | 1                | 0              | 7.113695                | 0.517695  | 0.358115  |

## Structure 27c (C<sub>2</sub>H<sub>5</sub>OH)

Energy (Hartrees): -938.331708004

No imaginary frequencies

Standard orientation:

| Center<br>Number | Atomic<br>Number | Atomic<br>Type | Coordinates (Angstroms) |           |           |
|------------------|------------------|----------------|-------------------------|-----------|-----------|
|                  |                  |                | X                       | Y         | Z         |
| 1                | 6                | 0              | -3.175704               | 0.907698  | 1.018256  |
| 2                | 6                | 0              | -4.204331               | -0.015528 | 1.087394  |
| 3                | 6                | 0              | -4.287487               | -1.045640 | 0.144947  |
| 4                | 6                | 0              | -3.329400               | -1.141616 | -0.862601 |
| 5                | 6                | 0              | -2.300037               | -0.201789 | -0.918342 |
| 6                | 6                | 0              | -2.201567               | 0.831936  | 0.012369  |
| 7                | 1                | 0              | -3.121889               | 1.702101  | 1.755063  |
| 8                | 1                | 0              | -4.957730               | 0.044938  | 1.865018  |
| 9                | 1                | 0              | -3.372836               | -1.923523 | -1.609581 |
| 10               | 1                | 0              | -1.569241               | -0.275134 | -1.718201 |
| 11               | 6                | 0              | -1.114290               | 1.837290  | -0.058076 |
| 12               | 6                | 0              | 0.217508                | 1.512764  | -0.045759 |
| 13               | 6                | 0              | -1.408105               | 3.244379  | -0.114446 |
| 14               | 1                | 0              | 0.949213                | 2.312879  | -0.109768 |
| 15               | 8                | 0              | -5.333870               | -1.903591 | 0.287644  |
| 16               | 6                | 0              | -5.488522               | -2.922937 | -0.692487 |
| 17               | 1                | 0              | -4.629798               | -3.599704 | -0.694540 |
| 18               | 1                | 0              | -6.383253               | -3.475654 | -0.412691 |
| 19               | 1                | 0              | -5.623433               | -2.489891 | -1.687417 |
| 20               | 7                | 0              | 0.720749                | 0.275875  | 0.071167  |
| 21               | 1                | 0              | 0.072891                | -0.488190 | 0.236098  |
| 22               | 6                | 0              | 2.093235                | -0.056222 | 0.088191  |
| 23               | 6                | 0              | 2.486934                | -1.227992 | 0.742396  |
| 24               | 6                | 0              | 3.054419                | 0.731754  | -0.534937 |
| 25               | 6                | 0              | 3.820528                | -1.591214 | 0.783226  |
| 26               | 1                | 0              | 1.739141                | -1.849261 | 1.224279  |
| 27               | 6                | 0              | 4.402141                | 0.377368  | -0.482530 |
| 28               | 1                | 0              | 2.769886                | 1.621780  | -1.083592 |
| 29               | 6                | 0              | 4.789442                | -0.786234 | 0.177318  |
| 30               | 1                | 0              | 4.131251                | -2.497563 | 1.290381  |
| 31               | 1                | 0              | 5.127382                | 1.011123  | -0.975275 |
| 32               | 8                | 0              | -2.531343               | 3.743705  | -0.125631 |
| 33               | 1                | 0              | -0.522916               | 3.904375  | -0.155773 |
| 34               | 8                | 0              | 6.077261                | -1.219106 | 0.276680  |
| 35               | 6                | 0              | 7.079213                | -0.461795 | -0.390144 |
| 36               | 1                | 0              | 8.018156                | -0.981856 | -0.209971 |
| 37               | 1                | 0              | 6.885879                | -0.420851 | -1.465764 |
| 38               | 1                | 0              | 7.141799                | 0.551907  | 0.015361  |

## Structure 27d (vacuum)

Energy (Hartrees): -938.288802913

No imaginary frequencies

Standard orientation:

| Center<br>Number | Atomic<br>Number | Atomic<br>Type | Coordinates (Angstroms) |           |           |
|------------------|------------------|----------------|-------------------------|-----------|-----------|
|                  |                  |                | X                       | Y         | Z         |
| 1                | 6                | 0              | -3.436671               | 0.874923  | 0.611351  |
| 2                | 6                | 0              | -4.581176               | 0.084625  | 0.687157  |
| 3                | 6                | 0              | -4.631453               | -1.129650 | 0.005842  |
| 4                | 6                | 0              | -3.534881               | -1.536631 | -0.756041 |
| 5                | 6                | 0              | -2.409144               | -0.735924 | -0.828917 |
| 6                | 6                | 0              | -2.327764               | 0.478461  | -0.134255 |
| 7                | 1                | 0              | -3.413434               | 1.818588  | 1.140604  |
| 8                | 1                | 0              | -5.418457               | 0.429699  | 1.278430  |
| 9                | 1                | 0              | -3.599622               | -2.472362 | -1.297595 |
| 10               | 1                | 0              | -1.581857               | -1.047174 | -1.458605 |
| 11               | 6                | 0              | -1.097443               | 1.304341  | -0.194873 |
| 12               | 6                | 0              | 0.118539                | 0.696697  | -0.095243 |
| 13               | 6                | 0              | -1.194794               | 2.751718  | -0.370916 |
| 14               | 1                | 0              | 0.138330                | -0.378662 | 0.052448  |
| 15               | 7                | 0              | 1.357101                | 1.260156  | -0.118554 |
| 16               | 1                | 0              | 1.438796                | 2.264211  | -0.100223 |
| 17               | 6                | 0              | 2.568427                | 0.541049  | -0.078940 |
| 18               | 6                | 0              | 3.700282                | 1.143550  | 0.458768  |
| 19               | 6                | 0              | 2.672024                | -0.758049 | -0.587361 |
| 20               | 6                | 0              | 4.919304                | 0.472738  | 0.502888  |
| 21               | 1                | 0              | 3.631465                | 2.148636  | 0.861039  |
| 22               | 6                | 0              | 3.874714                | -1.437740 | -0.523199 |
| 23               | 1                | 0              | 1.819253                | -1.232430 | -1.057222 |
| 24               | 6                | 0              | 5.008767                | -0.830903 | 0.020164  |
| 25               | 1                | 0              | 5.777913                | 0.974400  | 0.927646  |
| 26               | 1                | 0              | 3.966889                | -2.443435 | -0.914171 |
| 27               | 8                | 0              | -5.698265               | -1.972923 | 0.013621  |
| 28               | 6                | 0              | -6.841561               | -1.573956 | 0.738880  |
| 29               | 1                | 0              | -7.575721               | -2.365561 | 0.606287  |
| 30               | 1                | 0              | -6.616157               | -1.462132 | 1.804319  |
| 31               | 1                | 0              | -7.246784               | -0.633392 | 0.352351  |
| 32               | 1                | 0              | -0.230282               | 3.286082  | -0.500339 |
| 33               | 8                | 0              | -2.218507               | 3.396157  | -0.399236 |
| 34               | 8                | 0              | 6.141344                | -1.580680 | 0.024865  |
| 35               | 6                | 0              | 7.314689                | -0.991639 | 0.544413  |
| 36               | 1                | 0              | 7.191322                | -0.728827 | 1.599944  |
| 37               | 1                | 0              | 8.096573                | -1.741366 | 0.447660  |
| 38               | 1                | 0              | 7.594345                | -0.099445 | -0.025004 |



## Structure 27d (CHCl<sub>3</sub>)

Energy (Hartrees): -938.318523165

No imaginary frequencies

Standard orientation:

| Center<br>Number | Atomic<br>Number | Atomic<br>Type | Coordinates (Angstroms) |           |           |
|------------------|------------------|----------------|-------------------------|-----------|-----------|
|                  |                  |                | X                       | Y         | Z         |
| 1                | 6                | 0              | -3.426619               | 0.859058  | 0.641914  |
| 2                | 6                | 0              | -4.570702               | 0.066053  | 0.712435  |
| 3                | 6                | 0              | -4.629309               | -1.127935 | -0.005194 |
| 4                | 6                | 0              | -3.541551               | -1.510579 | -0.793734 |
| 5                | 6                | 0              | -2.416286               | -0.705974 | -0.860176 |
| 6                | 6                | 0              | -2.326931               | 0.489815  | -0.133784 |
| 7                | 1                | 0              | -3.394856               | 1.781717  | 1.208446  |
| 8                | 1                | 0              | -5.399340               | 0.388789  | 1.329052  |
| 9                | 1                | 0              | -3.604965               | -2.433077 | -1.359338 |
| 10               | 1                | 0              | -1.592940               | -1.004691 | -1.501294 |
| 11               | 6                | 0              | -1.097952               | 1.322148  | -0.184566 |
| 12               | 6                | 0              | 0.123353                | 0.706776  | -0.096084 |
| 13               | 6                | 0              | -1.197110               | 2.759070  | -0.364979 |
| 14               | 1                | 0              | 0.135836                | -0.372932 | 0.019428  |
| 15               | 7                | 0              | 1.354719                | 1.262406  | -0.100539 |
| 16               | 1                | 0              | 1.448266                | 2.267843  | -0.055373 |
| 17               | 6                | 0              | 2.565799                | 0.536915  | -0.073717 |
| 18               | 6                | 0              | 3.695285                | 1.134321  | 0.476342  |
| 19               | 6                | 0              | 2.669250                | -0.753396 | -0.603642 |
| 20               | 6                | 0              | 4.914540                | 0.463573  | 0.515595  |
| 21               | 1                | 0              | 3.622820                | 2.135994  | 0.887057  |
| 22               | 6                | 0              | 3.874416                | -1.432307 | -0.547423 |
| 23               | 1                | 0              | 1.818245                | -1.224630 | -1.081020 |
| 24               | 6                | 0              | 5.006101                | -0.833017 | 0.011414  |
| 25               | 1                | 0              | 5.771446                | 0.958884  | 0.952154  |
| 26               | 1                | 0              | 3.963555                | -2.432259 | -0.955728 |
| 27               | 8                | 0              | -5.694844               | -1.971644 | -0.004115 |
| 28               | 6                | 0              | -6.823026               | -1.605069 | 0.772163  |
| 29               | 1                | 0              | -7.556939               | -2.396299 | 0.630800  |
| 30               | 1                | 0              | -6.566748               | -1.535988 | 1.833716  |
| 31               | 1                | 0              | -7.245259               | -0.654838 | 0.431795  |
| 32               | 1                | 0              | -0.238989               | 3.302607  | -0.466018 |
| 33               | 8                | 0              | -2.232542               | 3.398675  | -0.435101 |
| 34               | 8                | 0              | 6.140410                | -1.579938 | 0.010274  |
| 35               | 6                | 0              | 7.311473                | -1.000183 | 0.561261  |
| 36               | 1                | 0              | 7.171697                | -0.759624 | 1.619506  |
| 37               | 1                | 0              | 8.093488                | -1.750851 | 0.463283  |
| 38               | 1                | 0              | 7.603067                | -0.099850 | 0.011881  |

## Structure 27d (DMSO)

Energy (Hartrees): -938.319521200

No imaginary frequencies

Standard orientation:

| Center<br>Number | Atomic<br>Number | Atomic<br>Type | Coordinates (Angstroms) |           |           |
|------------------|------------------|----------------|-------------------------|-----------|-----------|
|                  |                  |                | X                       | Y         | Z         |
| 1                | 6                | 0              | -3.424062               | 0.854883  | 0.648542  |
| 2                | 6                | 0              | -4.571447               | 0.065201  | 0.715043  |
| 3                | 6                | 0              | -4.633794               | -1.125344 | -0.010005 |
| 4                | 6                | 0              | -3.544339               | -1.506365 | -0.798284 |
| 5                | 6                | 0              | -2.415477               | -0.705293 | -0.859633 |
| 6                | 6                | 0              | -2.324218               | 0.488722  | -0.129494 |
| 7                | 1                | 0              | -3.389519               | 1.772555  | 1.223410  |
| 8                | 1                | 0              | -5.398103               | 0.386174  | 1.335635  |
| 9                | 1                | 0              | -3.604766               | -2.427061 | -1.367636 |
| 10               | 1                | 0              | -1.589787               | -1.008647 | -1.495686 |
| 11               | 6                | 0              | -1.096360               | 1.322675  | -0.177940 |
| 12               | 6                | 0              | 0.126225                | 0.703183  | -0.099828 |
| 13               | 6                | 0              | -1.198292               | 2.758456  | -0.354021 |
| 14               | 1                | 0              | 0.135733                | -0.378335 | -0.000752 |
| 15               | 7                | 0              | 1.354904                | 1.256229  | -0.102261 |
| 16               | 1                | 0              | 1.454004                | 2.262166  | -0.047258 |
| 17               | 6                | 0              | 2.565223                | 0.529931  | -0.077026 |
| 18               | 6                | 0              | 3.699012                | 1.139643  | 0.451581  |
| 19               | 6                | 0              | 2.665405                | -0.769342 | -0.585636 |
| 20               | 6                | 0              | 4.919451                | 0.470877  | 0.494513  |
| 21               | 1                | 0              | 3.628188                | 2.150379  | 0.840069  |
| 22               | 6                | 0              | 3.873388                | -1.444579 | -0.528059 |
| 23               | 1                | 0              | 1.811403                | -1.252508 | -1.045791 |
| 24               | 6                | 0              | 5.009488                | -0.834656 | 0.011244  |
| 25               | 1                | 0              | 5.778749                | 0.976662  | 0.914536  |
| 26               | 1                | 0              | 3.956743                | -2.451408 | -0.920939 |
| 27               | 8                | 0              | -5.701385               | -1.963462 | -0.014585 |
| 28               | 6                | 0              | -6.824905               | -1.597863 | 0.772951  |
| 29               | 1                | 0              | -7.562076               | -2.386094 | 0.632247  |
| 30               | 1                | 0              | -6.560704               | -1.534604 | 1.832571  |
| 31               | 1                | 0              | -7.246554               | -0.644359 | 0.441702  |
| 32               | 1                | 0              | -0.242829               | 3.306471  | -0.439913 |
| 33               | 8                | 0              | -2.238359               | 3.392939  | -0.439067 |
| 34               | 8                | 0              | 6.145082                | -1.577825 | 0.014014  |
| 35               | 6                | 0              | 7.313353                | -0.986557 | 0.563942  |
| 36               | 1                | 0              | 7.168459                | -0.736574 | 1.619060  |
| 37               | 1                | 0              | 8.099865                | -1.733743 | 0.475433  |
| 38               | 1                | 0              | 7.602269                | -0.089339 | 0.008909  |

## Structure 27d (C<sub>2</sub>H<sub>5</sub>OH)

Energy (Hartrees): -938.323037423

No imaginary frequencies

Standard orientation:

| Center<br>Number | Atomic<br>Number | Atomic<br>Type | Coordinates (Angstroms) |           |           |
|------------------|------------------|----------------|-------------------------|-----------|-----------|
|                  |                  |                | X                       | Y         | Z         |
| 1                | 6                | 0              | -3.412514               | 0.838985  | 0.683348  |
| 2                | 6                | 0              | -4.558299               | 0.046747  | 0.742517  |
| 3                | 6                | 0              | -4.622532               | -1.125523 | -0.009359 |
| 4                | 6                | 0              | -3.541207               | -1.489959 | -0.814675 |
| 5                | 6                | 0              | -2.414930               | -0.684905 | -0.869965 |
| 6                | 6                | 0              | -2.321623               | 0.493315  | -0.115823 |
| 7                | 1                | 0              | -3.372310               | 1.740231  | 1.284501  |
| 8                | 1                | 0              | -5.379953               | 0.351449  | 1.377668  |
| 9                | 1                | 0              | -3.606201               | -2.399657 | -1.401335 |
| 10               | 1                | 0              | -1.593847               | -0.971997 | -1.519309 |
| 11               | 6                | 0              | -1.097032               | 1.333943  | -0.163827 |
| 12               | 6                | 0              | 0.129628                | 0.717295  | -0.072005 |
| 13               | 6                | 0              | -1.200732               | 2.756988  | -0.368130 |
| 14               | 1                | 0              | 0.138405                | -0.363301 | 0.037944  |
| 15               | 7                | 0              | 1.354683                | 1.269056  | -0.074113 |
| 16               | 1                | 0              | 1.455377                | 2.275941  | -0.035800 |
| 17               | 6                | 0              | 2.564861                | 0.538401  | -0.058594 |
| 18               | 6                | 0              | 3.698478                | 1.134085  | 0.484879  |
| 19               | 6                | 0              | 2.659314                | -0.749154 | -0.595499 |
| 20               | 6                | 0              | 4.916292                | 0.460140  | 0.515135  |
| 21               | 1                | 0              | 3.630407                | 2.136301  | 0.895176  |
| 22               | 6                | 0              | 3.864301                | -1.430365 | -0.550493 |
| 23               | 1                | 0              | 1.803752                | -1.217085 | -1.068530 |
| 24               | 6                | 0              | 4.999334                | -0.834028 | 0.003835  |
| 25               | 1                | 0              | 5.777638                | 0.952392  | 0.946710  |
| 26               | 1                | 0              | 3.947143                | -2.428779 | -0.964911 |
| 27               | 8                | 0              | -5.693036               | -1.968290 | -0.024509 |
| 28               | 6                | 0              | -6.823100               | -1.612346 | 0.761847  |
| 29               | 1                | 0              | -7.559923               | -2.397036 | 0.600995  |
| 30               | 1                | 0              | -6.564372               | -1.569276 | 1.823424  |
| 31               | 1                | 0              | -7.237058               | -0.652498 | 0.440721  |
| 32               | 1                | 0              | -0.252507               | 3.315672  | -0.438798 |
| 33               | 8                | 0              | -2.248596               | 3.385608  | -0.496198 |
| 34               | 8                | 0              | 6.136161                | -1.583844 | -0.008388 |
| 35               | 6                | 0              | 7.311747                | -1.007713 | 0.547071  |
| 36               | 1                | 0              | 7.169415                | -0.774052 | 1.605841  |
| 37               | 1                | 0              | 8.091582                | -1.759973 | 0.443564  |
| 38               | 1                | 0              | 7.601535                | -0.104943 | 0.002126  |

## Structure 27g (vacuum)

Energy (Hartrees): -938.294907935

No imaginary frequencies

Standard orientation:

| Center<br>Number | Atomic<br>Number | Atomic<br>Type | Coordinates (Angstroms) |           |           |
|------------------|------------------|----------------|-------------------------|-----------|-----------|
|                  |                  |                | X                       | Y         | Z         |
| 1                | 6                | 0              | -2.634063               | -0.512780 | -0.728895 |
| 2                | 6                | 0              | -3.840877               | -1.209254 | -0.694777 |
| 3                | 6                | 0              | -4.882677               | -0.738329 | 0.100905  |
| 4                | 6                | 0              | -4.698154               | 0.416894  | 0.864012  |
| 5                | 6                | 0              | -3.488286               | 1.085927  | 0.831752  |
| 6                | 6                | 0              | -2.431805               | 0.641981  | 0.023951  |
| 7                | 1                | 0              | -1.843835               | -0.871892 | -1.379950 |
| 8                | 1                | 0              | -3.954546               | -2.099222 | -1.298833 |
| 9                | 1                | 0              | -5.515103               | 0.756998  | 1.488601  |
| 10               | 1                | 0              | -3.347488               | 1.960072  | 1.458172  |
| 11               | 6                | 0              | -1.146566               | 1.375794  | -0.035201 |
| 12               | 6                | 0              | -1.123422               | 2.733377  | -0.136462 |
| 13               | 6                | 0              | 0.102284                | 0.642349  | 0.007859  |
| 14               | 1                | 0              | -2.044018               | 3.308559  | -0.185909 |
| 15               | 1                | 0              | 0.039503                | -0.444830 | 0.128591  |
| 16               | 8                | 0              | -0.032086               | 3.471755  | -0.197992 |
| 17               | 1                | 0              | 0.744794                | 2.843477  | -0.175039 |
| 18               | 7                | 0              | 1.244878                | 1.227967  | -0.084408 |
| 19               | 6                | 0              | 2.433270                | 0.478565  | 0.040894  |
| 20               | 6                | 0              | 2.566212                | -0.590486 | 0.936888  |
| 21               | 6                | 0              | 3.532464                | 0.843537  | -0.730282 |
| 22               | 6                | 0              | 3.755338                | -1.290757 | 1.025121  |
| 23               | 1                | 0              | 1.742183                | -0.850691 | 1.591352  |
| 24               | 6                | 0              | 4.730377                | 0.139098  | -0.655469 |
| 25               | 1                | 0              | 3.437117                | 1.683263  | -1.408537 |
| 26               | 6                | 0              | 4.843617                | -0.937089 | 0.223703  |
| 27               | 1                | 0              | 3.874927                | -2.109307 | 1.724114  |
| 28               | 1                | 0              | 5.560209                | 0.442286  | -1.279358 |
| 29               | 8                | 0              | -6.100592               | -1.331988 | 0.204763  |
| 30               | 6                | 0              | -6.325478               | -2.502995 | -0.550721 |
| 31               | 1                | 0              | -5.632667               | -3.299765 | -0.261388 |
| 32               | 1                | 0              | -7.344730               | -2.812871 | -0.331040 |
| 33               | 1                | 0              | -6.228243               | -2.306955 | -1.623351 |
| 34               | 8                | 0              | 5.966537                | -1.685587 | 0.382183  |
| 35               | 6                | 0              | 7.096422                | -1.344818 | -0.392525 |
| 36               | 1                | 0              | 7.876243                | -2.050851 | -0.116203 |
| 37               | 1                | 0              | 6.885034                | -1.436969 | -1.462679 |
| 38               | 1                | 0              | 7.433664                | -0.326591 | -0.173836 |

## Structure 27g (CHCl<sub>3</sub>)

Energy (Hartrees): -938.318215649

No imaginary frequencies

Standard orientation:

| Center<br>Number | Atomic<br>Number | Atomic<br>Type | Coordinates (Angstroms) |           |           |
|------------------|------------------|----------------|-------------------------|-----------|-----------|
|                  |                  |                | X                       | Y         | Z         |
| 1                | 6                | 0              | -2.642373               | -0.530467 | -0.709783 |
| 2                | 6                | 0              | -3.855599               | -1.216630 | -0.674471 |
| 3                | 6                | 0              | -4.902036               | -0.721380 | 0.101628  |
| 4                | 6                | 0              | -4.716279               | 0.449105  | 0.842654  |
| 5                | 6                | 0              | -3.500486               | 1.109467  | 0.808811  |
| 6                | 6                | 0              | -2.439159               | 0.639955  | 0.021071  |
| 7                | 1                | 0              | -1.846851               | -0.913795 | -1.340678 |
| 8                | 1                | 0              | -3.970561               | -2.120155 | -1.258651 |
| 9                | 1                | 0              | -5.534251               | 0.812919  | 1.453808  |
| 10               | 1                | 0              | -3.363673               | 1.998376  | 1.415486  |
| 11               | 6                | 0              | -1.145892               | 1.362654  | -0.037177 |
| 12               | 6                | 0              | -1.111926               | 2.720733  | -0.125175 |
| 13               | 6                | 0              | 0.097880                | 0.617129  | -0.000660 |
| 14               | 1                | 0              | -2.023908               | 3.310314  | -0.165199 |
| 15               | 1                | 0              | 0.032365                | -0.468926 | 0.118242  |
| 16               | 8                | 0              | -0.006242               | 3.445292  | -0.182401 |
| 17               | 1                | 0              | 0.762750                | 2.800041  | -0.170065 |
| 18               | 7                | 0              | 1.241505                | 1.202369  | -0.093419 |
| 19               | 6                | 0              | 2.434623                | 0.459022  | 0.032431  |
| 20               | 6                | 0              | 2.564906                | -0.624729 | 0.911352  |
| 21               | 6                | 0              | 3.540042                | 0.848393  | -0.719646 |
| 22               | 6                | 0              | 3.761722                | -1.313061 | 1.003474  |
| 23               | 1                | 0              | 1.733497                | -0.909642 | 1.546389  |
| 24               | 6                | 0              | 4.745460                | 0.156189  | -0.640935 |
| 25               | 1                | 0              | 3.447388                | 1.698475  | -1.386479 |
| 26               | 6                | 0              | 4.857921                | -0.933544 | 0.222660  |
| 27               | 1                | 0              | 3.875454                | -2.142967 | 1.691218  |
| 28               | 1                | 0              | 5.580910                | 0.477555  | -1.248605 |
| 29               | 8                | 0              | -6.123358               | -1.305978 | 0.204171  |
| 30               | 6                | 0              | -6.351880               | -2.488772 | -0.543720 |
| 31               | 1                | 0              | -5.673812               | -3.289445 | -0.233503 |
| 32               | 1                | 0              | -7.378133               | -2.784129 | -0.333334 |
| 33               | 1                | 0              | -6.239896               | -2.304694 | -1.616395 |
| 34               | 8                | 0              | 5.986936                | -1.670342 | 0.382406  |
| 35               | 6                | 0              | 7.124460                | -1.307515 | -0.382849 |
| 36               | 1                | 0              | 7.910540                | -2.006658 | -0.104171 |
| 37               | 1                | 0              | 6.923436                | -1.396639 | -1.454642 |
| 38               | 1                | 0              | 7.447218                | -0.288288 | -0.150901 |

## Structure 27g (DMSO)

Energy (Hartrees): -938.316108508

No imaginary frequencies

Standard orientation:

| Center<br>Number | Atomic<br>Number | Atomic<br>Type | Coordinates (Angstroms) |           |           |
|------------------|------------------|----------------|-------------------------|-----------|-----------|
|                  |                  |                | X                       | Y         | Z         |
| 1                | 6                | 0              | -2.634536               | -0.554323 | -0.677388 |
| 2                | 6                | 0              | -3.850730               | -1.235902 | -0.642440 |
| 3                | 6                | 0              | -4.912547               | -0.711369 | 0.094126  |
| 4                | 6                | 0              | -4.736619               | 0.485021  | 0.796763  |
| 5                | 6                | 0              | -3.518000               | 1.141133  | 0.764454  |
| 6                | 6                | 0              | -2.441784               | 0.640917  | 0.016392  |
| 7                | 1                | 0              | -1.828630               | -0.965602 | -1.276803 |
| 8                | 1                | 0              | -3.954824               | -2.159381 | -1.197061 |
| 9                | 1                | 0              | -5.563488               | 0.877520  | 1.377771  |
| 10               | 1                | 0              | -3.394102               | 2.052465  | 1.340097  |
| 11               | 6                | 0              | -1.145480               | 1.358135  | -0.037860 |
| 12               | 6                | 0              | -1.106021               | 2.716685  | -0.128423 |
| 13               | 6                | 0              | 0.095255                | 0.608277  | 0.005852  |
| 14               | 1                | 0              | -2.015119               | 3.310367  | -0.176369 |
| 15               | 1                | 0              | 0.026768                | -0.478246 | 0.113361  |
| 16               | 8                | 0              | 0.004714                | 3.433723  | -0.176693 |
| 17               | 1                | 0              | 0.766756                | 2.777113  | -0.156501 |
| 18               | 7                | 0              | 1.240169                | 1.195354  | -0.072825 |
| 19               | 6                | 0              | 2.434667                | 0.452745  | 0.046439  |
| 20               | 6                | 0              | 2.557654                | -0.663404 | 0.885497  |
| 21               | 6                | 0              | 3.549419                | 0.875942  | -0.673304 |
| 22               | 6                | 0              | 3.756355                | -1.350499 | 0.966629  |
| 23               | 1                | 0              | 1.719306                | -0.979102 | 1.496593  |
| 24               | 6                | 0              | 4.757414                | 0.186259  | -0.604593 |
| 25               | 1                | 0              | 3.464706                | 1.751698  | -1.307707 |
| 26               | 6                | 0              | 4.862777                | -0.937630 | 0.216077  |
| 27               | 1                | 0              | 3.859041                | -2.207483 | 1.622489  |
| 28               | 1                | 0              | 5.599491                | 0.536001  | -1.187237 |
| 29               | 8                | 0              | -6.135615               | -1.289622 | 0.191497  |
| 30               | 6                | 0              | -6.347121               | -2.498648 | -0.523564 |
| 31               | 1                | 0              | -5.674913               | -3.286745 | -0.172349 |
| 32               | 1                | 0              | -7.377303               | -2.789249 | -0.326770 |
| 33               | 1                | 0              | -6.210411               | -2.349777 | -1.598540 |
| 34               | 8                | 0              | 5.990784                | -1.676311 | 0.358520  |
| 35               | 6                | 0              | 7.132119                | -1.281683 | -0.389489 |
| 36               | 1                | 0              | 7.916190                | -1.995171 | -0.143530 |
| 37               | 1                | 0              | 6.931729                | -1.318967 | -1.464073 |
| 38               | 1                | 0              | 7.457634                | -0.275181 | -0.111208 |

## Structure 27g (C<sub>2</sub>H<sub>5</sub>OH)

Energy (Hartrees): -938.317957677

No imaginary frequencies

Standard orientation:

| Center<br>Number | Atomic<br>Number | Atomic<br>Type | Coordinates (Angstroms) |           |           |
|------------------|------------------|----------------|-------------------------|-----------|-----------|
|                  |                  |                | X                       | Y         | Z         |
| 1                | 6                | 0              | -2.626468               | -0.546032 | -0.685084 |
| 2                | 6                | 0              | -3.838422               | -1.234876 | -0.651873 |
| 3                | 6                | 0              | -4.897081               | -0.721963 | 0.095106  |
| 4                | 6                | 0              | -4.727154               | 0.466090  | 0.810924  |
| 5                | 6                | 0              | -3.512497               | 1.129913  | 0.779530  |
| 6                | 6                | 0              | -2.438484               | 0.643313  | 0.020059  |
| 7                | 1                | 0              | -1.820542               | -0.945220 | -1.292712 |
| 8                | 1                | 0              | -3.941431               | -2.153333 | -1.214966 |
| 9                | 1                | 0              | -5.554812               | 0.844606  | 1.400545  |
| 10               | 1                | 0              | -3.390142               | 2.035499  | 1.364447  |
| 11               | 6                | 0              | -1.146636               | 1.368962  | -0.036364 |
| 12               | 6                | 0              | -1.118908               | 2.725064  | -0.131715 |
| 13               | 6                | 0              | 0.098416                | 0.623269  | 0.008830  |
| 14               | 1                | 0              | -2.030051               | 3.314755  | -0.180721 |
| 15               | 1                | 0              | 0.032283                | -0.462669 | 0.124321  |
| 16               | 8                | 0              | -0.009064               | 3.453681  | -0.185277 |
| 17               | 1                | 0              | 0.762658                | 2.810717  | -0.164300 |
| 18               | 7                | 0              | 1.241215                | 1.211115  | -0.077008 |
| 19               | 6                | 0              | 2.433734                | 0.464527  | 0.044840  |
| 20               | 6                | 0              | 2.558943                | -0.629342 | 0.911626  |
| 21               | 6                | 0              | 3.541916                | 0.861830  | -0.699606 |
| 22               | 6                | 0              | 3.754408                | -1.322070 | 0.997176  |
| 23               | 1                | 0              | 1.725158                | -0.922110 | 1.540281  |
| 24               | 6                | 0              | 4.745691                | 0.165493  | -0.627772 |
| 25               | 1                | 0              | 3.455486                | 1.720599  | -1.356421 |
| 26               | 6                | 0              | 4.851644                | -0.935238 | 0.221936  |
| 27               | 1                | 0              | 3.861760                | -2.161986 | 1.674369  |
| 28               | 1                | 0              | 5.583231                | 0.492434  | -1.229899 |
| 29               | 8                | 0              | -6.122005               | -1.308850 | 0.190850  |
| 30               | 6                | 0              | -6.333531               | -2.513928 | -0.534190 |
| 31               | 1                | 0              | -5.657572               | -3.301243 | -0.189449 |
| 32               | 1                | 0              | -7.362789               | -2.806538 | -0.335107 |
| 33               | 1                | 0              | -6.200269               | -2.352842 | -1.607451 |
| 34               | 8                | 0              | 5.981372                | -1.679479 | 0.371386  |
| 35               | 6                | 0              | 7.119335                | -1.312785 | -0.398845 |
| 36               | 1                | 0              | 7.902284                | -2.020261 | -0.132675 |
| 37               | 1                | 0              | 6.907796                | -1.388068 | -1.469044 |
| 38               | 1                | 0              | 7.446584                | -0.298327 | -0.155293 |

## Structure 28a (vacuum)

Energy (Hartrees): -913.769748913

No imaginary frequencies

Standard orientation:

| Center<br>Number | Atomic<br>Number | Atomic<br>Type | Coordinates (Angstroms) |           |           |
|------------------|------------------|----------------|-------------------------|-----------|-----------|
|                  |                  |                | X                       | Y         | Z         |
| 1                | 6                | 0              | -2.319443               | 1.335734  | 0.555380  |
| 2                | 6                | 0              | -3.608300               | 0.833280  | 0.642919  |
| 3                | 6                | 0              | -3.883459               | -0.395673 | 0.062271  |
| 4                | 6                | 0              | -2.914968               | -1.126046 | -0.610242 |
| 5                | 6                | 0              | -1.636455               | -0.600729 | -0.703681 |
| 6                | 6                | 0              | -1.309733               | 0.630316  | -0.116315 |
| 7                | 1                | 0              | -2.086717               | 2.275435  | 1.041989  |
| 8                | 1                | 0              | -4.391633               | 1.366289  | 1.164868  |
| 9                | 1                | 0              | -3.175884               | -2.072677 | -1.063742 |
| 10               | 1                | 0              | -0.884601               | -1.139021 | -1.269115 |
| 11               | 6                | 0              | 0.057797                | 1.173894  | -0.205072 |
| 12               | 6                | 0              | 1.141554                | 0.338799  | -0.067230 |
| 13               | 6                | 0              | 0.254950                | 2.592407  | -0.440261 |
| 14               | 1                | 0              | 0.972531                | -0.711630 | 0.148287  |
| 15               | 1                | 0              | -0.662984               | 3.189164  | -0.583388 |
| 16               | 8                | 0              | 1.345350                | 3.141910  | -0.509675 |
| 17               | 7                | 0              | 2.424169                | 0.719117  | -0.134633 |
| 18               | 1                | 0              | 2.573068                | 1.718766  | -0.267521 |
| 19               | 6                | 0              | 3.545476                | -0.119465 | 0.012619  |
| 20               | 6                | 0              | 4.766211                | 0.471632  | 0.343241  |
| 21               | 6                | 0              | 3.475391                | -1.499317 | -0.181642 |
| 22               | 6                | 0              | 5.900396                | -0.313053 | 0.493455  |
| 23               | 1                | 0              | 4.815101                | 1.544960  | 0.489840  |
| 24               | 6                | 0              | 4.615013                | -2.276623 | -0.014162 |
| 25               | 1                | 0              | 2.549761                | -1.970710 | -0.486821 |
| 26               | 6                | 0              | 5.830447                | -1.692442 | 0.323708  |
| 27               | 1                | 0              | 6.841850                | 0.157225  | 0.750372  |
| 28               | 1                | 0              | 4.551475                | -3.347391 | -0.166551 |
| 29               | 1                | 0              | 6.715523                | -2.304048 | 0.444979  |
| 30               | 7                | 0              | -5.248757               | -0.941567 | 0.158909  |
| 31               | 8                | 0              | -5.460550               | -2.017381 | -0.359219 |
| 32               | 8                | 0              | -6.076631               | -0.282719 | 0.751011  |



## Structure 28a (CHCl<sub>3</sub>)

Energy (Hartrees): -913.795948036

No imaginary frequencies

Standard orientation:

| Center<br>Number | Atomic<br>Number | Atomic<br>Type | Coordinates (Angstroms) |           |           |
|------------------|------------------|----------------|-------------------------|-----------|-----------|
|                  |                  |                | X                       | Y         | Z         |
| 1                | 6                | 0              | -2.325654               | 1.334033  | 0.554914  |
| 2                | 6                | 0              | -3.616245               | 0.836782  | 0.635735  |
| 3                | 6                | 0              | -3.892520               | -0.393234 | 0.053666  |
| 4                | 6                | 0              | -2.920721               | -1.129229 | -0.611566 |
| 5                | 6                | 0              | -1.640004               | -0.609960 | -0.697048 |
| 6                | 6                | 0              | -1.313658               | 0.623772  | -0.111697 |
| 7                | 1                | 0              | -2.094844               | 2.273391  | 1.043761  |
| 8                | 1                | 0              | -4.393383               | 1.380702  | 1.156170  |
| 9                | 1                | 0              | -3.172370               | -2.077106 | -1.068227 |
| 10               | 1                | 0              | -0.887354               | -1.159410 | -1.250753 |
| 11               | 6                | 0              | 0.055020                | 1.166485  | -0.192759 |
| 12               | 6                | 0              | 1.138483                | 0.320774  | -0.071073 |
| 13               | 6                | 0              | 0.245326                | 2.583711  | -0.405967 |
| 14               | 1                | 0              | 0.962694                | -0.734041 | 0.113318  |
| 15               | 1                | 0              | -0.671172               | 3.180073  | -0.547947 |
| 16               | 8                | 0              | 1.337424                | 3.143058  | -0.465875 |
| 17               | 7                | 0              | 2.418419                | 0.699819  | -0.124656 |
| 18               | 1                | 0              | 2.578426                | 1.699392  | -0.242899 |
| 19               | 6                | 0              | 3.547926                | -0.131310 | 0.016155  |
| 20               | 6                | 0              | 4.776510                | 0.487557  | 0.258728  |
| 21               | 6                | 0              | 3.481348                | -1.521211 | -0.094799 |
| 22               | 6                | 0              | 5.925754                | -0.278137 | 0.398784  |
| 23               | 1                | 0              | 4.820242                | 1.568489  | 0.341178  |
| 24               | 6                | 0              | 4.638224                | -2.277382 | 0.057302  |
| 25               | 1                | 0              | 2.547055                | -2.021927 | -0.314416 |
| 26               | 6                | 0              | 5.863262                | -1.665778 | 0.304368  |
| 27               | 1                | 0              | 6.872881                | 0.214467  | 0.586049  |
| 28               | 1                | 0              | 4.577913                | -3.356129 | -0.030756 |
| 29               | 1                | 0              | 6.760446                | -2.262653 | 0.415587  |
| 30               | 7                | 0              | -5.253147               | -0.932803 | 0.142458  |
| 31               | 8                | 0              | -5.470996               | -2.017861 | -0.360138 |
| 32               | 8                | 0              | -6.095894               | -0.269648 | 0.714244  |

## Structure 28a (DMSO)

Energy (Hartrees): -913.794681634

No imaginary frequencies

Standard orientation:

| Center<br>Number | Atomic<br>Number | Atomic<br>Type | Coordinates (Angstroms) |           |           |
|------------------|------------------|----------------|-------------------------|-----------|-----------|
|                  |                  |                | X                       | Y         | Z         |
| 1                | 6                | 0              | 2.345481                | 1.337973  | -0.556334 |
| 2                | 6                | 0              | 3.635865                | 0.837339  | -0.607625 |
| 3                | 6                | 0              | 3.894814                | -0.397777 | -0.027087 |
| 4                | 6                | 0              | 2.903000                | -1.135588 | 0.607344  |
| 5                | 6                | 0              | 1.622561                | -0.612923 | 0.665316  |
| 6                | 6                | 0              | 1.314456                | 0.626752  | 0.080533  |
| 7                | 1                | 0              | 2.132343                | 2.282352  | -1.043131 |
| 8                | 1                | 0              | 4.424769                | 1.385029  | -1.105988 |
| 9                | 1                | 0              | 3.135238                | -2.088523 | 1.063959  |
| 10               | 1                | 0              | 0.855720                | -1.166746 | 1.194627  |
| 11               | 6                | 0              | -0.053111               | 1.173531  | 0.131606  |
| 12               | 6                | 0              | -1.134519               | 0.320665  | 0.036381  |
| 13               | 6                | 0              | -0.241273               | 2.596923  | 0.302705  |
| 14               | 1                | 0              | -0.953228               | -0.738902 | -0.106876 |
| 15               | 1                | 0              | 0.676259                | 3.194854  | 0.426989  |
| 16               | 8                | 0              | -1.332321               | 3.160687  | 0.347250  |
| 17               | 7                | 0              | -2.415233               | 0.696067  | 0.083012  |
| 18               | 1                | 0              | -2.583733               | 1.694678  | 0.195007  |
| 19               | 6                | 0              | -3.545431               | -0.137608 | -0.027637 |
| 20               | 6                | 0              | -4.797136               | 0.483967  | -0.021339 |
| 21               | 6                | 0              | -3.462698               | -1.527633 | -0.135160 |
| 22               | 6                | 0              | -5.954440               | -0.276025 | -0.124933 |
| 23               | 1                | 0              | -4.852397               | 1.564300  | 0.063962  |
| 24               | 6                | 0              | -4.630178               | -2.276420 | -0.240749 |
| 25               | 1                | 0              | -2.509385               | -2.040006 | -0.134437 |
| 26               | 6                | 0              | -5.878921               | -1.661957 | -0.236875 |
| 27               | 1                | 0              | -6.917978               | 0.220526  | -0.118381 |
| 28               | 1                | 0              | -4.555976               | -3.354900 | -0.323576 |
| 29               | 1                | 0              | -6.781942               | -2.255313 | -0.317013 |
| 30               | 7                | 0              | 5.254648                | -0.937913 | -0.082209 |
| 31               | 8                | 0              | 5.453030                | -2.041102 | 0.391322  |
| 32               | 8                | 0              | 6.122239                | -0.258553 | -0.598276 |

## Structure 28a (C<sub>2</sub>H<sub>5</sub>OH)

Energy (Hartrees): -913.795195207

No imaginary frequencies

Standard orientation:

| Center<br>Number | Atomic<br>Number | Atomic<br>Type | Coordinates (Angstroms) |           |           |
|------------------|------------------|----------------|-------------------------|-----------|-----------|
|                  |                  |                | X                       | Y         | Z         |
| 1                | 6                | 0              | 2.339512                | 1.336132  | -0.552217 |
| 2                | 6                | 0              | 3.630180                | 0.839532  | -0.613290 |
| 3                | 6                | 0              | 3.895511                | -0.394187 | -0.031442 |
| 4                | 6                | 0              | 2.911286                | -1.133370 | 0.614261  |
| 5                | 6                | 0              | 1.630488                | -0.613919 | 0.681386  |
| 6                | 6                | 0              | 1.315443                | 0.623772  | 0.095168  |
| 7                | 1                | 0              | 2.118939                | 2.277768  | -1.040766 |
| 8                | 1                | 0              | 4.412931                | 1.388568  | -1.119628 |
| 9                | 1                | 0              | 3.150325                | -2.084336 | 1.071549  |
| 10               | 1                | 0              | 0.869673                | -1.167805 | 1.219165  |
| 11               | 6                | 0              | -0.051885               | 1.169306  | 0.152789  |
| 12               | 6                | 0              | -1.135866               | 0.314856  | 0.056350  |
| 13               | 6                | 0              | -0.237253               | 2.587710  | 0.318914  |
| 14               | 1                | 0              | -0.954814               | -0.744095 | -0.091504 |
| 15               | 1                | 0              | 0.677260                | 3.187780  | 0.443922  |
| 16               | 8                | 0              | -1.332063               | 3.155830  | 0.358002  |
| 17               | 7                | 0              | -2.413720               | 0.689679  | 0.102642  |
| 18               | 1                | 0              | -2.584373               | 1.687930  | 0.216774  |
| 19               | 6                | 0              | -3.546169               | -0.141522 | -0.020798 |
| 20               | 6                | 0              | -4.792002               | 0.489363  | -0.064306 |
| 21               | 6                | 0              | -3.468681               | -1.533621 | -0.091140 |
| 22               | 6                | 0              | -5.951399               | -0.265102 | -0.183196 |
| 23               | 1                | 0              | -4.840790               | 1.571739  | -0.006258 |
| 24               | 6                | 0              | -4.638059               | -2.277093 | -0.212747 |
| 25               | 1                | 0              | -2.518815               | -2.050640 | -0.046755 |
| 26               | 6                | 0              | -5.881744               | -1.653662 | -0.260497 |
| 27               | 1                | 0              | -6.911380               | 0.237143  | -0.217187 |
| 28               | 1                | 0              | -4.570130               | -3.357715 | -0.266226 |
| 29               | 1                | 0              | -6.786039               | -2.243078 | -0.354450 |
| 30               | 7                | 0              | 5.250920                | -0.932210 | -0.099662 |
| 31               | 8                | 0              | 5.464989                | -2.024806 | 0.393099  |
| 32               | 8                | 0              | 6.112154                | -0.267862 | -0.646714 |

## Structure 28b (vacuum)

Energy (Hartrees): -913.763477532

No imaginary frequencies

Standard orientation:

| Center<br>Number | Atomic<br>Number | Atomic<br>Type | Coordinates (Angstroms) |           |           |
|------------------|------------------|----------------|-------------------------|-----------|-----------|
|                  |                  |                | X                       | Y         | Z         |
| 1                | 6                | 0              | 2.189917                | 1.288556  | -0.809318 |
| 2                | 6                | 0              | 3.356493                | 0.537992  | -0.809783 |
| 3                | 6                | 0              | 3.448255                | -0.543930 | 0.052387  |
| 4                | 6                | 0              | 2.422513                | -0.888783 | 0.919993  |
| 5                | 6                | 0              | 1.267665                | -0.121818 | 0.914796  |
| 6                | 6                | 0              | 1.126492                | 0.972082  | 0.047206  |
| 7                | 1                | 0              | 2.092703                | 2.121606  | -1.495859 |
| 8                | 1                | 0              | 4.182252                | 0.769295  | -1.469165 |
| 9                | 1                | 0              | 2.545817                | -1.728981 | 1.589899  |
| 10               | 1                | 0              | 0.473305                | -0.349778 | 1.617065  |
| 11               | 6                | 0              | -0.100277               | 1.790088  | 0.052165  |
| 12               | 6                | 0              | -1.357984               | 1.270794  | 0.017108  |
| 13               | 6                | 0              | 0.005726                | 3.256379  | 0.090413  |
| 14               | 1                | 0              | -2.185358               | 1.973054  | 0.045234  |
| 15               | 1                | 0              | 1.040565                | 3.644720  | 0.159581  |
| 16               | 8                | 0              | -0.931604               | 4.021275  | 0.072285  |
| 17               | 7                | 0              | -1.685195               | -0.033713 | -0.102549 |
| 18               | 1                | 0              | -0.936529               | -0.688902 | -0.287051 |
| 19               | 6                | 0              | -2.990963               | -0.560201 | -0.095637 |
| 20               | 6                | 0              | -3.213021               | -1.801562 | -0.694797 |
| 21               | 6                | 0              | -4.049637               | 0.115301  | 0.512562  |
| 22               | 6                | 0              | -4.485063               | -2.355764 | -0.694204 |
| 23               | 1                | 0              | -2.388852               | -2.322276 | -1.170939 |
| 24               | 6                | 0              | -5.321792               | -0.442993 | 0.491717  |
| 25               | 1                | 0              | -3.883658               | 1.057113  | 1.020150  |
| 26               | 6                | 0              | -5.548809               | -1.676792 | -0.108135 |
| 27               | 1                | 0              | -4.645152               | -3.319247 | -1.163175 |
| 28               | 1                | 0              | -6.138527               | 0.088038  | 0.965926  |
| 29               | 1                | 0              | -6.541947               | -2.107539 | -0.113098 |
| 30               | 7                | 0              | 4.681010                | -1.355023 | 0.049827  |
| 31               | 8                | 0              | 4.721293                | -2.313893 | 0.790435  |
| 32               | 8                | 0              | 5.575007                | -1.013888 | -0.693764 |

## Structure 28b (CHCl<sub>3</sub>)

Energy (Hartrees): -913.791655336

No imaginary frequencies

Standard orientation:

| Center<br>Number | Atomic<br>Number | Atomic<br>Type | Coordinates (Angstroms) |           |           |
|------------------|------------------|----------------|-------------------------|-----------|-----------|
|                  |                  |                | X                       | Y         | Z         |
| 1                | 6                | 0              | 2.235346                | 1.326368  | -0.746970 |
| 2                | 6                | 0              | 3.404946                | 0.582379  | -0.740503 |
| 3                | 6                | 0              | 3.463067                | -0.553642 | 0.054820  |
| 4                | 6                | 0              | 2.397890                | -0.957617 | 0.848761  |
| 5                | 6                | 0              | 1.240422                | -0.196265 | 0.838944  |
| 6                | 6                | 0              | 1.133372                | 0.952175  | 0.037521  |
| 7                | 1                | 0              | 2.170661                | 2.201507  | -1.383299 |
| 8                | 1                | 0              | 4.253367                | 0.865727  | -1.349279 |
| 9                | 1                | 0              | 2.483814                | -1.838107 | 1.471382  |
| 10               | 1                | 0              | 0.418909                | -0.480125 | 1.487043  |
| 11               | 6                | 0              | -0.092263               | 1.771317  | 0.039208  |
| 12               | 6                | 0              | -1.360587               | 1.260184  | 0.000903  |
| 13               | 6                | 0              | 0.026718                | 3.226528  | 0.100627  |
| 14               | 1                | 0              | -2.183680               | 1.966153  | 0.055685  |
| 15               | 1                | 0              | 1.059284                | 3.605012  | 0.210594  |
| 16               | 8                | 0              | -0.901903               | 4.013640  | 0.063034  |
| 17               | 7                | 0              | -1.703132               | -0.029774 | -0.146098 |
| 18               | 1                | 0              | -0.972298               | -0.697286 | -0.366999 |
| 19               | 6                | 0              | -3.015854               | -0.542701 | -0.111753 |
| 20               | 6                | 0              | -3.263983               | -1.765522 | -0.739441 |
| 21               | 6                | 0              | -4.048792               | 0.122771  | 0.551210  |
| 22               | 6                | 0              | -4.540457               | -2.310820 | -0.716166 |
| 23               | 1                | 0              | -2.455274               | -2.278160 | -1.249849 |
| 24               | 6                | 0              | -5.325732               | -0.427646 | 0.554247  |
| 25               | 1                | 0              | -3.860548               | 1.047627  | 1.082909  |
| 26               | 6                | 0              | -5.580589               | -1.641818 | -0.075931 |
| 27               | 1                | 0              | -4.722245               | -3.259442 | -1.208037 |
| 28               | 1                | 0              | -6.123515               | 0.093629  | 1.070850  |
| 29               | 1                | 0              | -6.577091               | -2.066216 | -0.060994 |
| 30               | 7                | 0              | 4.693923                | -1.354462 | 0.058932  |
| 31               | 8                | 0              | 4.700530                | -2.385473 | 0.701662  |
| 32               | 8                | 0              | 5.642881                | -0.946268 | -0.580033 |

## Structure 28b (DMSO)

Energy (Hartrees): -913.791200679

No imaginary frequencies

Standard orientation:

| Center<br>Number | Atomic<br>Number | Atomic<br>Type | Coordinates (Angstroms) |           |           |
|------------------|------------------|----------------|-------------------------|-----------|-----------|
|                  |                  |                | X                       | Y         | Z         |
| 1                | 6                | 0              | 2.243535                | 1.339944  | -0.726610 |
| 2                | 6                | 0              | 3.412285                | 0.595189  | -0.721950 |
| 3                | 6                | 0              | 3.462005                | -0.555586 | 0.053419  |
| 4                | 6                | 0              | 2.388043                | -0.972726 | 0.829144  |
| 5                | 6                | 0              | 1.231733                | -0.210307 | 0.822116  |
| 6                | 6                | 0              | 1.133703                | 0.952995  | 0.041282  |
| 7                | 1                | 0              | 2.187503                | 2.225515  | -1.349173 |
| 8                | 1                | 0              | 4.264124                | 0.891885  | -1.319695 |
| 9                | 1                | 0              | 2.461626                | -1.865689 | 1.435439  |
| 10               | 1                | 0              | 0.403890                | -0.509819 | 1.454939  |
| 11               | 6                | 0              | -0.090939               | 1.772574  | 0.044590  |
| 12               | 6                | 0              | -1.361520               | 1.262789  | 0.006038  |
| 13               | 6                | 0              | 0.030613                | 3.226496  | 0.107382  |
| 14               | 1                | 0              | -2.182630               | 1.970269  | 0.067395  |
| 15               | 1                | 0              | 1.062860                | 3.601289  | 0.229913  |
| 16               | 8                | 0              | -0.895072               | 4.018290  | 0.056882  |
| 17               | 7                | 0              | -1.706038               | -0.024146 | -0.146541 |
| 18               | 1                | 0              | -0.978310               | -0.695782 | -0.370196 |
| 19               | 6                | 0              | -3.017202               | -0.536880 | -0.111401 |
| 20               | 6                | 0              | -3.253988               | -1.774465 | -0.715554 |
| 21               | 6                | 0              | -4.059698               | 0.137681  | 0.528011  |
| 22               | 6                | 0              | -4.528822               | -2.324285 | -0.694182 |
| 23               | 1                | 0              | -2.435219               | -2.293587 | -1.203075 |
| 24               | 6                | 0              | -5.334591               | -0.418470 | 0.529567  |
| 25               | 1                | 0              | -3.882639               | 1.073968  | 1.043230  |
| 26               | 6                | 0              | -5.578754               | -1.646577 | -0.078396 |
| 27               | 1                | 0              | -4.701012               | -3.284634 | -1.166897 |
| 28               | 1                | 0              | -6.139267               | 0.109608  | 1.028682  |
| 29               | 1                | 0              | -6.573833               | -2.074875 | -0.064417 |
| 30               | 7                | 0              | 4.690525                | -1.356925 | 0.055519  |
| 31               | 8                | 0              | 4.691088                | -2.401277 | 0.678828  |
| 32               | 8                | 0              | 5.649370                | -0.938372 | -0.564425 |

## Structure 28b (C<sub>2</sub>H<sub>5</sub>OH)

Energy (Hartrees): -913.792200281

No imaginary frequencies

Standard orientation:

| Center<br>Number | Atomic<br>Number | Atomic<br>Type | Coordinates (Angstroms) |           |           |
|------------------|------------------|----------------|-------------------------|-----------|-----------|
|                  |                  |                | X                       | Y         | Z         |
| 1                | 6                | 0              | 2.236668                | 1.331489  | -0.742959 |
| 2                | 6                | 0              | 3.403483                | 0.584304  | -0.737733 |
| 3                | 6                | 0              | 3.456444                | -0.554351 | 0.055647  |
| 4                | 6                | 0              | 2.389039                | -0.957666 | 0.848072  |
| 5                | 6                | 0              | 1.234550                | -0.193247 | 0.838350  |
| 6                | 6                | 0              | 1.133124                | 0.957783  | 0.040127  |
| 7                | 1                | 0              | 2.176520                | 2.207918  | -1.378008 |
| 8                | 1                | 0              | 4.250555                | 0.869403  | -1.347860 |
| 9                | 1                | 0              | 2.465825                | -1.840418 | 1.468819  |
| 10               | 1                | 0              | 0.411720                | -0.480778 | 1.483086  |
| 11               | 6                | 0              | -0.091381               | 1.778922  | 0.042044  |
| 12               | 6                | 0              | -1.364017               | 1.264465  | 0.004749  |
| 13               | 6                | 0              | 0.032707                | 3.223785  | 0.100855  |
| 14               | 1                | 0              | -2.190058               | 1.966151  | 0.066424  |
| 15               | 1                | 0              | 1.063734                | 3.601243  | 0.209389  |
| 16               | 8                | 0              | -0.895171               | 4.024596  | 0.061221  |
| 17               | 7                | 0              | -1.701059               | -0.020762 | -0.146198 |
| 18               | 1                | 0              | -0.968971               | -0.691185 | -0.360589 |
| 19               | 6                | 0              | -3.012920               | -0.539051 | -0.111824 |
| 20               | 6                | 0              | -3.249822               | -1.766229 | -0.734897 |
| 21               | 6                | 0              | -4.050475               | 0.123605  | 0.546309  |
| 22               | 6                | 0              | -4.523845               | -2.318291 | -0.714437 |
| 23               | 1                | 0              | -2.433856               | -2.276270 | -1.236530 |
| 24               | 6                | 0              | -5.324612               | -0.433987 | 0.546696  |
| 25               | 1                | 0              | -3.869843               | 1.051095  | 1.076417  |
| 26               | 6                | 0              | -5.570156               | -1.652094 | -0.080530 |
| 27               | 1                | 0              | -4.698254               | -3.270798 | -1.202002 |
| 28               | 1                | 0              | -6.127078               | 0.084285  | 1.059554  |
| 29               | 1                | 0              | -6.564584               | -2.082232 | -0.067389 |
| 30               | 7                | 0              | 4.679831                | -1.356926 | 0.058230  |
| 31               | 8                | 0              | 4.698839                | -2.377571 | 0.720412  |
| 32               | 8                | 0              | 5.626352                | -0.970929 | -0.601427 |

## Structure 28c (vacuum)

Energy (Hartrees): -913.765236685

No imaginary frequencies

Standard orientation:

| Center<br>Number | Atomic<br>Number | Atomic<br>Type | Coordinates (Angstroms) |           |           |
|------------------|------------------|----------------|-------------------------|-----------|-----------|
|                  |                  |                | X                       | Y         | Z         |
| 1                | 6                | 0              | 2.150906                | 1.228315  | -0.787012 |
| 2                | 6                | 0              | 3.265732                | 0.403722  | -0.802456 |
| 3                | 6                | 0              | 3.300729                | -0.685092 | 0.055922  |
| 4                | 6                | 0              | 2.269742                | -0.967652 | 0.938264  |
| 5                | 6                | 0              | 1.161511                | -0.133541 | 0.942401  |
| 6                | 6                | 0              | 1.078117                | 0.962697  | 0.072723  |
| 7                | 1                | 0              | 2.110383                | 2.090535  | -1.438961 |
| 8                | 1                | 0              | 4.100183                | 0.591553  | -1.464504 |
| 9                | 1                | 0              | 2.350657                | -1.813205 | 1.607762  |
| 10               | 1                | 0              | 0.361098                | -0.316307 | 1.651120  |
| 11               | 6                | 0              | -0.115610               | 1.832333  | 0.076002  |
| 12               | 6                | 0              | -1.389081               | 1.355806  | 0.038798  |
| 13               | 6                | 0              | 0.024667                | 3.290005  | 0.070186  |
| 14               | 1                | 0              | -2.210440               | 2.065988  | 0.058642  |
| 15               | 7                | 0              | -1.758621               | 0.059154  | -0.078430 |
| 16               | 1                | 0              | -1.027827               | -0.614866 | -0.266839 |
| 17               | 6                | 0              | -3.079726               | -0.424004 | -0.086071 |
| 18               | 6                | 0              | -3.339134               | -1.648980 | -0.704051 |
| 19               | 6                | 0              | -4.120423               | 0.275643  | 0.526199  |
| 20               | 6                | 0              | -4.628351               | -2.161363 | -0.718206 |
| 21               | 1                | 0              | -2.529257               | -2.189658 | -1.182283 |
| 22               | 6                | 0              | -5.410757               | -0.239648 | 0.489271  |
| 23               | 1                | 0              | -3.926544               | 1.200191  | 1.055408  |
| 24               | 6                | 0              | -5.673868               | -1.456260 | -0.129782 |
| 25               | 1                | 0              | -4.816257               | -3.112758 | -1.201144 |
| 26               | 1                | 0              | -6.212690               | 0.310034  | 0.967542  |
| 27               | 1                | 0              | -6.680344               | -1.854394 | -0.147026 |
| 28               | 8                | 0              | 1.068712                | 3.895168  | 0.020037  |
| 29               | 1                | 0              | -0.939545               | 3.837241  | 0.119341  |
| 30               | 7                | 0              | 4.480977                | -1.571724 | 0.037567  |
| 31               | 8                | 0              | 4.476084                | -2.526636 | 0.784858  |
| 32               | 8                | 0              | 5.379876                | -1.293313 | -0.725664 |



## Structure 28c (CHCl<sub>3</sub>)

Energy (Hartrees): -913.794322506

No imaginary frequencies

Standard orientation:

| Center<br>Number | Atomic<br>Number | Atomic<br>Type | Coordinates (Angstroms) |           |           |
|------------------|------------------|----------------|-------------------------|-----------|-----------|
|                  |                  |                | X                       | Y         | Z         |
| 1                | 6                | 0              | 2.137808                | 1.201865  | -0.821839 |
| 2                | 6                | 0              | 3.257683                | 0.385203  | -0.833456 |
| 3                | 6                | 0              | 3.310122                | -0.681054 | 0.054182  |
| 4                | 6                | 0              | 2.290916                | -0.947986 | 0.956924  |
| 5                | 6                | 0              | 1.177767                | -0.121046 | 0.955182  |
| 6                | 6                | 0              | 1.079242                | 0.955332  | 0.062365  |
| 7                | 1                | 0              | 2.079018                | 2.038016  | -1.506761 |
| 8                | 1                | 0              | 4.074676                | 0.565106  | -1.519346 |
| 9                | 1                | 0              | 2.375794                | -1.775021 | 1.648999  |
| 10               | 1                | 0              | 0.385275                | -0.299763 | 1.673637  |
| 11               | 6                | 0              | -0.116148               | 1.823094  | 0.058547  |
| 12               | 6                | 0              | -1.396751               | 1.346078  | 0.028716  |
| 13               | 6                | 0              | 0.018403                | 3.270659  | 0.059853  |
| 14               | 1                | 0              | -2.214206               | 2.061033  | 0.055253  |
| 15               | 7                | 0              | -1.765742               | 0.056983  | -0.083162 |
| 16               | 1                | 0              | -1.043131               | -0.629268 | -0.271035 |
| 17               | 6                | 0              | -3.091087               | -0.422505 | -0.085248 |
| 18               | 6                | 0              | -3.354388               | -1.637397 | -0.722020 |
| 19               | 6                | 0              | -4.124415               | 0.269024  | 0.549409  |
| 20               | 6                | 0              | -4.644850               | -2.149137 | -0.733789 |
| 21               | 1                | 0              | -2.545918               | -2.169706 | -1.212223 |
| 22               | 6                | 0              | -5.415614               | -0.246847 | 0.516484  |
| 23               | 1                | 0              | -3.925051               | 1.186727  | 1.089487  |
| 24               | 6                | 0              | -5.684524               | -1.453558 | -0.121795 |
| 25               | 1                | 0              | -4.837904               | -3.092185 | -1.232042 |
| 26               | 1                | 0              | -6.213433               | 0.294407  | 1.012029  |
| 27               | 1                | 0              | -6.691838               | -1.851539 | -0.135646 |
| 28               | 8                | 0              | 1.067260                | 3.887168  | 0.048829  |
| 29               | 1                | 0              | -0.943841               | 3.817210  | 0.081124  |
| 30               | 7                | 0              | 4.492387                | -1.554558 | 0.044817  |
| 31               | 8                | 0              | 4.512358                | -2.495561 | 0.812959  |
| 32               | 8                | 0              | 5.389014                | -1.293151 | -0.731309 |

## Structure 28c (DMSO)

Energy (Hartrees): -913.795816754

No imaginary frequencies

Standard orientation:

| Center<br>Number | Atomic<br>Number | Atomic<br>Type | Coordinates (Angstroms) |           |           |
|------------------|------------------|----------------|-------------------------|-----------|-----------|
|                  |                  |                | X                       | Y         | Z         |
| 1                | 6                | 0              | 2.126631                | 1.183146  | -0.847604 |
| 2                | 6                | 0              | 3.250931                | 0.373597  | -0.855028 |
| 3                | 6                | 0              | 3.313461                | -0.678398 | 0.049923  |
| 4                | 6                | 0              | 2.298911                | -0.940900 | 0.960176  |
| 5                | 6                | 0              | 1.183481                | -0.117784 | 0.955975  |
| 6                | 6                | 0              | 1.077265                | 0.947387  | 0.050950  |
| 7                | 1                | 0              | 2.055372                | 2.001210  | -1.553766 |
| 8                | 1                | 0              | 4.058874                | 0.547696  | -1.553255 |
| 9                | 1                | 0              | 2.386145                | -1.758410 | 1.663387  |
| 10               | 1                | 0              | 0.395518                | -0.293555 | 1.680077  |
| 11               | 6                | 0              | -0.115164               | 1.819386  | 0.048697  |
| 12               | 6                | 0              | -1.403043               | 1.347009  | 0.018509  |
| 13               | 6                | 0              | 0.021658                | 3.256366  | 0.069403  |
| 14               | 1                | 0              | -2.215254               | 2.067656  | 0.047337  |
| 15               | 7                | 0              | -1.772789               | 0.064191  | -0.090450 |
| 16               | 1                | 0              | -1.052177               | -0.631523 | -0.257130 |
| 17               | 6                | 0              | -3.099339               | -0.415852 | -0.086452 |
| 18               | 6                | 0              | -3.350043               | -1.654000 | -0.681918 |
| 19               | 6                | 0              | -4.140681               | 0.294456  | 0.513042  |
| 20               | 6                | 0              | -4.639310               | -2.169826 | -0.692472 |
| 21               | 1                | 0              | -2.531985               | -2.200677 | -1.139597 |
| 22               | 6                | 0              | -5.429926               | -0.227306 | 0.482458  |
| 23               | 1                | 0              | -3.953945               | 1.231867  | 1.023168  |
| 24               | 6                | 0              | -5.688292               | -1.456112 | -0.117821 |
| 25               | 1                | 0              | -4.822878               | -3.131134 | -1.159066 |
| 26               | 1                | 0              | -6.234813               | 0.328214  | 0.950476  |
| 27               | 1                | 0              | -6.694811               | -1.857052 | -0.130148 |
| 28               | 8                | 0              | 1.080062                | 3.874555  | 0.090927  |
| 29               | 1                | 0              | -0.933040               | 3.810987  | 0.077923  |
| 30               | 7                | 0              | 4.496682                | -1.542413 | 0.046734  |
| 31               | 8                | 0              | 4.512454                | -2.501385 | 0.794632  |
| 32               | 8                | 0              | 5.412047                | -1.265013 | -0.704364 |

## Structure 28c (C<sub>2</sub>H<sub>5</sub>OH)

Energy (Hartrees): -913.795816754

No imaginary frequencies

Standard orientation:

| Center<br>Number | Atomic<br>Number | Atomic<br>Type | Coordinates (Angstroms) |           |           |
|------------------|------------------|----------------|-------------------------|-----------|-----------|
|                  |                  |                | X                       | Y         | Z         |
| 1                | 6                | 0              | 2.126631                | 1.183146  | -0.847604 |
| 2                | 6                | 0              | 3.250931                | 0.373597  | -0.855028 |
| 3                | 6                | 0              | 3.313461                | -0.678398 | 0.049923  |
| 4                | 6                | 0              | 2.298911                | -0.940900 | 0.960176  |
| 5                | 6                | 0              | 1.183481                | -0.117784 | 0.955975  |
| 6                | 6                | 0              | 1.077265                | 0.947387  | 0.050950  |
| 7                | 1                | 0              | 2.055372                | 2.001210  | -1.553766 |
| 8                | 1                | 0              | 4.058874                | 0.547696  | -1.553255 |
| 9                | 1                | 0              | 2.386145                | -1.758410 | 1.663387  |
| 10               | 1                | 0              | 0.395518                | -0.293555 | 1.680077  |
| 11               | 6                | 0              | -0.115164               | 1.819386  | 0.048697  |
| 12               | 6                | 0              | -1.403043               | 1.347009  | 0.018509  |
| 13               | 6                | 0              | 0.021658                | 3.256366  | 0.069403  |
| 14               | 1                | 0              | -2.215254               | 2.067656  | 0.047337  |
| 15               | 7                | 0              | -1.772789               | 0.064191  | -0.090450 |
| 16               | 1                | 0              | -1.052177               | -0.631523 | -0.257130 |
| 17               | 6                | 0              | -3.099339               | -0.415852 | -0.086452 |
| 18               | 6                | 0              | -3.350043               | -1.654000 | -0.681918 |
| 19               | 6                | 0              | -4.140681               | 0.294456  | 0.513042  |
| 20               | 6                | 0              | -4.639310               | -2.169826 | -0.692472 |
| 21               | 1                | 0              | -2.531985               | -2.200677 | -1.139597 |
| 22               | 6                | 0              | -5.429926               | -0.227306 | 0.482458  |
| 23               | 1                | 0              | -3.953945               | 1.231867  | 1.023168  |
| 24               | 6                | 0              | -5.688292               | -1.456112 | -0.117821 |
| 25               | 1                | 0              | -4.822878               | -3.131134 | -1.159066 |
| 26               | 1                | 0              | -6.234813               | 0.328214  | 0.950476  |
| 27               | 1                | 0              | -6.694811               | -1.857052 | -0.130148 |
| 28               | 8                | 0              | 1.080062                | 3.874555  | 0.090927  |
| 29               | 1                | 0              | -0.933040               | 3.810987  | 0.077923  |
| 30               | 7                | 0              | 4.496682                | -1.542413 | 0.046734  |
| 31               | 8                | 0              | 4.512454                | -2.501385 | 0.794632  |
| 32               | 8                | 0              | 5.412047                | -1.265013 | -0.704364 |

## Structure 28d (vacuum)

Energy (Hartrees): -913.756795244

No imaginary frequencies

Standard orientation:

| Center<br>Number | Atomic<br>Number | Atomic<br>Type | Coordinates (Angstroms) |           |           |
|------------------|------------------|----------------|-------------------------|-----------|-----------|
|                  |                  |                | X                       | Y         | Z         |
| 1                | 6                | 0              | -2.270306               | 1.302826  | 0.546128  |
| 2                | 6                | 0              | -3.515146               | 0.702740  | 0.654268  |
| 3                | 6                | 0              | -3.707225               | -0.546474 | 0.083041  |
| 4                | 6                | 0              | -2.700248               | -1.206565 | -0.603635 |
| 5                | 6                | 0              | -1.463436               | -0.589890 | -0.709618 |
| 6                | 6                | 0              | -1.221262               | 0.660432  | -0.125208 |
| 7                | 1                | 0              | -2.108414               | 2.277900  | 0.983937  |
| 8                | 1                | 0              | -4.331320               | 1.184609  | 1.175440  |
| 9                | 1                | 0              | -2.897527               | -2.170018 | -1.053812 |
| 10               | 1                | 0              | -0.680251               | -1.076168 | -1.280166 |
| 11               | 6                | 0              | 0.118999                | 1.282524  | -0.214781 |
| 12               | 6                | 0              | 1.225311                | 0.499910  | -0.057863 |
| 13               | 6                | 0              | 0.243263                | 2.717243  | -0.477992 |
| 14               | 1                | 0              | 1.080077                | -0.557291 | 0.139946  |
| 15               | 7                | 0              | 2.529901                | 0.873114  | -0.065277 |
| 16               | 1                | 0              | 2.758838                | 1.854909  | -0.083720 |
| 17               | 6                | 0              | 3.623915                | -0.008997 | 0.033272  |
| 18               | 6                | 0              | 4.834852                | 0.481795  | 0.525864  |
| 19               | 6                | 0              | 3.530323                | -1.341986 | -0.367090 |
| 20               | 6                | 0              | 5.934998                | -0.357193 | 0.628903  |
| 21               | 1                | 0              | 4.905705                | 1.517932  | 0.839363  |
| 22               | 6                | 0              | 4.633794                | -2.177679 | -0.240561 |
| 23               | 1                | 0              | 2.615379                | -1.724782 | -0.801692 |
| 24               | 6                | 0              | 5.839013                | -1.694148 | 0.255357  |
| 25               | 1                | 0              | 6.868857                | 0.035328  | 1.013206  |
| 26               | 1                | 0              | 4.551240                | -3.211770 | -0.552859 |
| 27               | 1                | 0              | 6.696376                | -2.349473 | 0.341264  |
| 28               | 1                | 0              | 1.277262                | 3.090261  | -0.626123 |
| 29               | 8                | 0              | -0.673212               | 3.499821  | -0.566758 |
| 30               | 7                | 0              | -5.028576               | -1.190597 | 0.199471  |
| 31               | 8                | 0              | -5.170426               | -2.278831 | -0.317232 |
| 32               | 8                | 0              | -5.892184               | -0.595527 | 0.807158  |

## Structure 28d (CHCl<sub>3</sub>)

Energy (Hartrees): -913.787072534

No imaginary frequencies

Standard orientation:

| Center<br>Number | Atomic<br>Number | Atomic<br>Type | Coordinates (Angstroms) |           |           |
|------------------|------------------|----------------|-------------------------|-----------|-----------|
|                  |                  |                | X                       | Y         | Z         |
| 1                | 6                | 0              | -2.277302               | 1.307044  | 0.538661  |
| 2                | 6                | 0              | -3.524022               | 0.711664  | 0.641170  |
| 3                | 6                | 0              | -3.712542               | -0.545014 | 0.080904  |
| 4                | 6                | 0              | -2.695499               | -1.216033 | -0.584179 |
| 5                | 6                | 0              | -1.457464               | -0.602802 | -0.684969 |
| 6                | 6                | 0              | -1.219559               | 0.658042  | -0.116831 |
| 7                | 1                | 0              | -2.119299               | 2.281394  | 0.980491  |
| 8                | 1                | 0              | -4.337526               | 1.206963  | 1.154474  |
| 9                | 1                | 0              | -2.877539               | -2.186982 | -1.025431 |
| 10               | 1                | 0              | -0.668598               | -1.104603 | -1.233791 |
| 11               | 6                | 0              | 0.117730                | 1.283570  | -0.200432 |
| 12               | 6                | 0              | 1.229901                | 0.491969  | -0.061007 |
| 13               | 6                | 0              | 0.247344                | 2.710213  | -0.453546 |
| 14               | 1                | 0              | 1.081452                | -0.569482 | 0.111863  |
| 15               | 7                | 0              | 2.523959                | 0.864943  | -0.067562 |
| 16               | 1                | 0              | 2.757959                | 1.849149  | -0.084468 |
| 17               | 6                | 0              | 3.622747                | -0.014333 | 0.030058  |
| 18               | 6                | 0              | 4.829130                | 0.489201  | 0.522042  |
| 19               | 6                | 0              | 3.536196                | -1.348491 | -0.369488 |
| 20               | 6                | 0              | 5.935960                | -0.342369 | 0.626373  |
| 21               | 1                | 0              | 4.888479                | 1.528180  | 0.829287  |
| 22               | 6                | 0              | 4.647467                | -2.175122 | -0.243866 |
| 23               | 1                | 0              | 2.620993                | -1.740142 | -0.796701 |
| 24               | 6                | 0              | 5.849679                | -1.680824 | 0.252238  |
| 25               | 1                | 0              | 6.867497                | 0.057281  | 1.010320  |
| 26               | 1                | 0              | 4.572959                | -3.210679 | -0.555120 |
| 27               | 1                | 0              | 6.712729                | -2.329826 | 0.337876  |
| 28               | 1                | 0              | 1.281086                | 3.088628  | -0.550110 |
| 29               | 8                | 0              | -0.672444               | 3.494759  | -0.592503 |
| 30               | 7                | 0              | -5.028170               | -1.184205 | 0.193398  |
| 31               | 8                | 0              | -5.171088               | -2.288526 | -0.294404 |
| 32               | 8                | 0              | -5.910131               | -0.580649 | 0.771620  |

## Structure 28d (DMSO)

Energy (Hartrees): -913.787929590

No imaginary frequencies

Standard orientation:

| Center<br>Number | Atomic<br>Number | Atomic<br>Type | Coordinates (Angstroms) |           |           |
|------------------|------------------|----------------|-------------------------|-----------|-----------|
|                  |                  |                | X                       | Y         | Z         |
| 1                | 6                | 0              | -2.277982               | 1.306408  | 0.538030  |
| 2                | 6                | 0              | -3.524590               | 0.711651  | 0.640284  |
| 3                | 6                | 0              | -3.713387               | -0.544865 | 0.078248  |
| 4                | 6                | 0              | -2.694218               | -1.215594 | -0.585112 |
| 5                | 6                | 0              | -1.455663               | -0.603510 | -0.684890 |
| 6                | 6                | 0              | -1.218135               | 0.658698  | -0.117418 |
| 7                | 1                | 0              | -2.120155               | 2.278168  | 0.985434  |
| 8                | 1                | 0              | -4.335830               | 1.208214  | 1.156204  |
| 9                | 1                | 0              | -2.871423               | -2.187597 | -1.026254 |
| 10               | 1                | 0              | -0.666035               | -1.109599 | -1.228635 |
| 11               | 6                | 0              | 0.117305                | 1.285115  | -0.197376 |
| 12               | 6                | 0              | 1.229809                | 0.486882  | -0.070572 |
| 13               | 6                | 0              | 0.250457                | 2.712997  | -0.433192 |
| 14               | 1                | 0              | 1.078217                | -0.576209 | 0.088523  |
| 15               | 7                | 0              | 2.520977                | 0.858076  | -0.077956 |
| 16               | 1                | 0              | 2.758533                | 1.842857  | -0.093076 |
| 17               | 6                | 0              | 3.619123                | -0.020372 | 0.023498  |
| 18               | 6                | 0              | 4.832075                | 0.498310  | 0.483759  |
| 19               | 6                | 0              | 3.528777                | -1.365222 | -0.340159 |
| 20               | 6                | 0              | 5.941639                | -0.328983 | 0.596955  |
| 21               | 1                | 0              | 4.893086                | 1.546658  | 0.757033  |
| 22               | 6                | 0              | 4.643944                | -2.186131 | -0.206879 |
| 23               | 1                | 0              | 2.609101                | -1.771417 | -0.743866 |
| 24               | 6                | 0              | 5.852360                | -1.677740 | 0.260662  |
| 25               | 1                | 0              | 6.877637                | 0.082569  | 0.957271  |
| 26               | 1                | 0              | 4.566954                | -3.229930 | -0.489377 |
| 27               | 1                | 0              | 6.717406                | -2.323582 | 0.352755  |
| 28               | 1                | 0              | 1.284659                | 3.090667  | -0.512474 |
| 29               | 8                | 0              | -0.667946               | 3.502105  | -0.575442 |
| 30               | 7                | 0              | -5.028136               | -1.181622 | 0.187924  |
| 31               | 8                | 0              | -5.175848               | -2.283049 | -0.307523 |
| 32               | 8                | 0              | -5.910097               | -0.580536 | 0.771922  |

## Structure 28d (C<sub>2</sub>H<sub>5</sub>OH)

Energy (Hartrees): -913.789002672

No imaginary frequencies

Standard orientation:

| Center<br>Number | Atomic<br>Number | Atomic<br>Type | Coordinates (Angstroms) |           |           |
|------------------|------------------|----------------|-------------------------|-----------|-----------|
|                  |                  |                | X                       | Y         | Z         |
| 1                | 6                | 0              | -2.268073               | 1.292176  | 0.572364  |
| 2                | 6                | 0              | -3.515761               | 0.700153  | 0.671004  |
| 3                | 6                | 0              | -3.710302               | -0.545150 | 0.085238  |
| 4                | 6                | 0              | -2.697014               | -1.209222 | -0.594342 |
| 5                | 6                | 0              | -1.457929               | -0.598422 | -0.690704 |
| 6                | 6                | 0              | -1.216563               | 0.654222  | -0.105143 |
| 7                | 1                | 0              | -2.102356               | 2.252344  | 1.042959  |
| 8                | 1                | 0              | -4.321687               | 1.190023  | 1.201463  |
| 9                | 1                | 0              | -2.879046               | -2.172574 | -1.052363 |
| 10               | 1                | 0              | -0.671527               | -1.095625 | -1.247456 |
| 11               | 6                | 0              | 0.116971                | 1.284230  | -0.191942 |
| 12               | 6                | 0              | 1.234520                | 0.489090  | -0.062056 |
| 13               | 6                | 0              | 0.241819                | 2.701413  | -0.448300 |
| 14               | 1                | 0              | 1.084241                | -0.573024 | 0.106084  |
| 15               | 7                | 0              | 2.521671                | 0.862035  | -0.077847 |
| 16               | 1                | 0              | 2.758214                | 1.847100  | -0.104464 |
| 17               | 6                | 0              | 3.622591                | -0.016488 | 0.024454  |
| 18               | 6                | 0              | 4.830257                | 0.499342  | 0.499141  |
| 19               | 6                | 0              | 3.534744                | -1.356291 | -0.355279 |
| 20               | 6                | 0              | 5.939645                | -0.328571 | 0.611397  |
| 21               | 1                | 0              | 4.888205                | 1.544559  | 0.784976  |
| 22               | 6                | 0              | 4.649223                | -2.178103 | -0.222973 |
| 23               | 1                | 0              | 2.617771                | -1.757029 | -0.770816 |
| 24               | 6                | 0              | 5.853389                | -1.673314 | 0.259247  |
| 25               | 1                | 0              | 6.872884                | 0.079266  | 0.983079  |
| 26               | 1                | 0              | 4.575732                | -3.218685 | -0.518173 |
| 27               | 1                | 0              | 6.718466                | -2.319438 | 0.350329  |
| 28               | 1                | 0              | 1.269316                | 3.093203  | -0.523912 |
| 29               | 8                | 0              | -0.688233               | 3.481263  | -0.615919 |
| 30               | 7                | 0              | -5.024741               | -1.175727 | 0.185400  |
| 31               | 8                | 0              | -5.178968               | -2.275860 | -0.312603 |
| 32               | 8                | 0              | -5.912027               | -0.575988 | 0.763870  |

## Structure 28e (vacuum)

Energy (Hartrees): -913.752369425

No imaginary frequencies

Standard orientation:

| Center<br>Number | Atomic<br>Number | Atomic<br>Type | Coordinates (Angstroms) |           |           |
|------------------|------------------|----------------|-------------------------|-----------|-----------|
|                  |                  |                | X                       | Y         | Z         |
| 1                | 6                | 0              | 1.921966                | 1.144751  | -0.627087 |
| 2                | 6                | 0              | 3.291570                | 1.055158  | -0.442766 |
| 3                | 6                | 0              | 3.820133                | -0.107937 | 0.099967  |
| 4                | 6                | 0              | 3.020950                | -1.175185 | 0.474949  |
| 5                | 6                | 0              | 1.650402                | -1.067041 | 0.292286  |
| 6                | 6                | 0              | 1.078411                | 0.079069  | -0.277613 |
| 7                | 1                | 0              | 1.501022                | 2.047778  | -1.046242 |
| 8                | 1                | 0              | 3.952392                | 1.866391  | -0.716413 |
| 9                | 1                | 0              | 3.470041                | -2.055367 | 0.914477  |
| 10               | 1                | 0              | 1.009875                | -1.875417 | 0.625075  |
| 11               | 6                | 0              | -0.377747               | 0.139895  | -0.521055 |
| 12               | 6                | 0              | -1.020347               | -0.985617 | -0.941579 |
| 13               | 6                | 0              | -1.094002               | 1.424900  | -0.424033 |
| 14               | 1                | 0              | -0.412765               | -1.835205 | -1.245040 |
| 15               | 7                | 0              | -2.360094               | -1.217256 | -1.065238 |
| 16               | 1                | 0              | -2.610630               | -2.017389 | -1.625800 |
| 17               | 6                | 0              | -3.434412               | -0.661141 | -0.322688 |
| 18               | 6                | 0              | -3.268428               | -0.248034 | 1.000084  |
| 19               | 6                | 0              | -4.689520               | -0.589448 | -0.921827 |
| 20               | 6                | 0              | -4.356171               | 0.247741  | 1.704165  |
| 21               | 1                | 0              | -2.293811               | -0.311289 | 1.469241  |
| 22               | 6                | 0              | -5.776222               | -0.105838 | -0.201401 |
| 23               | 1                | 0              | -4.808430               | -0.903174 | -1.953107 |
| 24               | 6                | 0              | -5.614142               | 0.320983  | 1.110633  |
| 25               | 1                | 0              | -4.219807               | 0.572146  | 2.728709  |
| 26               | 1                | 0              | -6.748810               | -0.052590 | -0.675740 |
| 27               | 1                | 0              | -6.458088               | 0.708379  | 1.667375  |
| 28               | 1                | 0              | -2.116587               | 1.430087  | -0.838214 |
| 29               | 8                | 0              | -0.618078               | 2.442298  | 0.022024  |
| 30               | 7                | 0              | 5.278067                | -0.208427 | 0.295368  |
| 31               | 8                | 0              | 5.711490                | -1.236883 | 0.770711  |
| 32               | 8                | 0              | 5.955981                | 0.741072  | -0.033666 |



## Structure 28e (CHCl<sub>3</sub>)

Energy (Hartrees): -913.781281111

No imaginary frequencies

Standard orientation:

| Center<br>Number | Atomic<br>Number | Atomic<br>Type | Coordinates (Angstroms) |           |           |
|------------------|------------------|----------------|-------------------------|-----------|-----------|
|                  |                  |                | X                       | Y         | Z         |
| 1                | 6                | 0              | 1.907870                | 1.115574  | -0.656253 |
| 2                | 6                | 0              | 3.279817                | 1.051556  | -0.485651 |
| 3                | 6                | 0              | 3.830732                | -0.089218 | 0.086248  |
| 4                | 6                | 0              | 3.048208                | -1.158571 | 0.496138  |
| 5                | 6                | 0              | 1.675273                | -1.075287 | 0.324921  |
| 6                | 6                | 0              | 1.078950                | 0.050377  | -0.265160 |
| 7                | 1                | 0              | 1.474548                | 1.997871  | -1.106707 |
| 8                | 1                | 0              | 3.918131                | 1.868354  | -0.795082 |
| 9                | 1                | 0              | 3.504631                | -2.025446 | 0.954994  |
| 10               | 1                | 0              | 1.052900                | -1.888174 | 0.680328  |
| 11               | 6                | 0              | -0.379974               | 0.092784  | -0.485017 |
| 12               | 6                | 0              | -1.020967               | -1.064360 | -0.849670 |
| 13               | 6                | 0              | -1.101979               | 1.362622  | -0.419639 |
| 14               | 1                | 0              | -0.408614               | -1.913961 | -1.141542 |
| 15               | 7                | 0              | -2.344000               | -1.331837 | -0.930749 |
| 16               | 1                | 0              | -2.583224               | -2.174544 | -1.436677 |
| 17               | 6                | 0              | -3.435235               | -0.702693 | -0.272645 |
| 18               | 6                | 0              | -3.313942               | -0.243096 | 1.040105  |
| 19               | 6                | 0              | -4.654156               | -0.609342 | -0.938856 |
| 20               | 6                | 0              | -4.410831               | 0.331822  | 1.666858  |
| 21               | 1                | 0              | -2.367235               | -0.330939 | 1.561091  |
| 22               | 6                | 0              | -5.751531               | -0.044025 | -0.295657 |
| 23               | 1                | 0              | -4.735268               | -0.971740 | -1.957888 |
| 24               | 6                | 0              | -5.632800               | 0.435500  | 1.003923  |
| 25               | 1                | 0              | -4.312260               | 0.692997  | 2.683977  |
| 26               | 1                | 0              | -6.697731               | 0.028353  | -0.819401 |
| 27               | 1                | 0              | -6.484462               | 0.886109  | 1.499343  |
| 28               | 1                | 0              | -2.121577               | 1.353466  | -0.836525 |
| 29               | 8                | 0              | -0.642890               | 2.404534  | 0.008783  |
| 30               | 7                | 0              | 5.283567                | -0.160794 | 0.274025  |
| 31               | 8                | 0              | 5.744642                | -1.156439 | 0.797729  |
| 32               | 8                | 0              | 5.956570                | 0.777433  | -0.104851 |

## Structure 28e (DMSO)

Energy (Hartrees): -913.781632659

No imaginary frequencies

Standard orientation:

| Center<br>Number | Atomic<br>Number | Atomic<br>Type | Coordinates (Angstroms) |           |           |
|------------------|------------------|----------------|-------------------------|-----------|-----------|
|                  |                  |                | X                       | Y         | Z         |
| 1                | 6                | 0              | 1.898828                | 1.101643  | -0.678181 |
| 2                | 6                | 0              | 3.269776                | 1.048450  | -0.499054 |
| 3                | 6                | 0              | 3.825134                | -0.084083 | 0.086364  |
| 4                | 6                | 0              | 3.046279                | -1.157539 | 0.495071  |
| 5                | 6                | 0              | 1.673937                | -1.085369 | 0.314980  |
| 6                | 6                | 0              | 1.072766                | 0.034624  | -0.282565 |
| 7                | 1                | 0              | 1.464845                | 1.976067  | -1.143407 |
| 8                | 1                | 0              | 3.901853                | 1.867662  | -0.814912 |
| 9                | 1                | 0              | 3.501899                | -2.021621 | 0.960241  |
| 10               | 1                | 0              | 1.056483                | -1.903878 | 0.666149  |
| 11               | 6                | 0              | -0.383998               | 0.071524  | -0.504570 |
| 12               | 6                | 0              | -1.026483               | -1.094915 | -0.849014 |
| 13               | 6                | 0              | -1.108975               | 1.337007  | -0.456289 |
| 14               | 1                | 0              | -0.418786               | -1.948974 | -1.137064 |
| 15               | 7                | 0              | -2.346791               | -1.360518 | -0.910430 |
| 16               | 1                | 0              | -2.594816               | -2.210984 | -1.401690 |
| 17               | 6                | 0              | -3.427991               | -0.710088 | -0.258043 |
| 18               | 6                | 0              | -3.294950               | -0.235749 | 1.048948  |
| 19               | 6                | 0              | -4.648958               | -0.611564 | -0.919654 |
| 20               | 6                | 0              | -4.381242               | 0.362106  | 1.673293  |
| 21               | 1                | 0              | -2.348146               | -0.334191 | 1.568254  |
| 22               | 6                | 0              | -5.735691               | -0.022218 | -0.278963 |
| 23               | 1                | 0              | -4.740528               | -0.991946 | -1.931189 |
| 24               | 6                | 0              | -5.604661               | 0.474960  | 1.013284  |
| 25               | 1                | 0              | -4.274516               | 0.732716  | 2.686431  |
| 26               | 1                | 0              | -6.683718               | 0.053680  | -0.799224 |
| 27               | 1                | 0              | -6.448515               | 0.942781  | 1.506619  |
| 28               | 1                | 0              | -2.120361               | 1.319824  | -0.892799 |
| 29               | 8                | 0              | -0.666293               | 2.386043  | -0.022744 |
| 30               | 7                | 0              | 5.274929                | -0.141636 | 0.286903  |
| 31               | 8                | 0              | 5.743589                | -1.135231 | 0.810286  |
| 32               | 8                | 0              | 5.943294                | 0.806839  | -0.079587 |

## Structure 28e (C<sub>2</sub>H<sub>5</sub>OH)

Energy (Hartrees): -913.782933983

No imaginary frequencies

Standard orientation:

| Center<br>Number | Atomic<br>Number | Atomic<br>Type | Coordinates (Angstroms) |           |           |
|------------------|------------------|----------------|-------------------------|-----------|-----------|
|                  |                  |                | X                       | Y         | Z         |
| 1                | 6                | 0              | 1.897802                | 1.109534  | -0.672638 |
| 2                | 6                | 0              | 3.268988                | 1.054210  | -0.499003 |
| 3                | 6                | 0              | 3.823039                | -0.080005 | 0.084998  |
| 4                | 6                | 0              | 3.044408                | -1.151792 | 0.499818  |
| 5                | 6                | 0              | 1.671886                | -1.075385 | 0.327202  |
| 6                | 6                | 0              | 1.071699                | 0.045401  | -0.269710 |
| 7                | 1                | 0              | 1.464659                | 1.981195  | -1.144415 |
| 8                | 1                | 0              | 3.901331                | 1.871113  | -0.820628 |
| 9                | 1                | 0              | 3.499883                | -2.016720 | 0.963719  |
| 10               | 1                | 0              | 1.053349                | -1.891118 | 0.683229  |
| 11               | 6                | 0              | -0.386852               | 0.083437  | -0.484832 |
| 12               | 6                | 0              | -1.023626               | -1.085756 | -0.845659 |
| 13               | 6                | 0              | -1.111914               | 1.337932  | -0.408870 |
| 14               | 1                | 0              | -0.405958               | -1.926174 | -1.152205 |
| 15               | 7                | 0              | -2.335286               | -1.370915 | -0.902366 |
| 16               | 1                | 0              | -2.572693               | -2.228432 | -1.387064 |
| 17               | 6                | 0              | -3.426789               | -0.718963 | -0.262657 |
| 18               | 6                | 0              | -3.316455               | -0.284936 | 1.059474  |
| 19               | 6                | 0              | -4.626328               | -0.579684 | -0.953312 |
| 20               | 6                | 0              | -4.406481               | 0.316891  | 1.673123  |
| 21               | 1                | 0              | -2.383343               | -0.415683 | 1.596439  |
| 22               | 6                | 0              | -5.718191               | 0.012282  | -0.323284 |
| 23               | 1                | 0              | -4.698584               | -0.929587 | -1.977349 |
| 24               | 6                | 0              | -5.609944               | 0.470376  | 0.985198  |
| 25               | 1                | 0              | -4.319425               | 0.657770  | 2.698537  |
| 26               | 1                | 0              | -6.651833               | 0.120517  | -0.863481 |
| 27               | 1                | 0              | -6.457681               | 0.939870  | 1.470501  |
| 28               | 1                | 0              | -2.134484               | 1.329532  | -0.813854 |
| 29               | 8                | 0              | -0.657124               | 2.389796  | 0.023418  |
| 30               | 7                | 0              | 5.270139                | -0.144354 | 0.271615  |
| 31               | 8                | 0              | 5.747030                | -1.151466 | 0.762359  |
| 32               | 8                | 0              | 5.941763                | 0.810840  | -0.072936 |

## Structure 28f (vacuum)

Energy (Hartrees): -913.751187170

No imaginary frequencies

Standard orientation:

| Center<br>Number | Atomic<br>Number | Atomic<br>Type | Coordinates (Angstroms) |           |           |
|------------------|------------------|----------------|-------------------------|-----------|-----------|
|                  |                  |                | X                       | Y         | Z         |
| 1                | 6                | 0              | 2.021483                | 1.270848  | -0.393578 |
| 2                | 6                | 0              | 3.394096                | 1.153181  | -0.247466 |
| 3                | 6                | 0              | 3.923014                | -0.082680 | 0.095533  |
| 4                | 6                | 0              | 3.122176                | -1.194376 | 0.305026  |
| 5                | 6                | 0              | 1.749430                | -1.054650 | 0.173160  |
| 6                | 6                | 0              | 1.172094                | 0.171386  | -0.189426 |
| 7                | 1                | 0              | 1.606803                | 2.222187  | -0.704483 |
| 8                | 1                | 0              | 4.057230                | 1.991797  | -0.411848 |
| 9                | 1                | 0              | 3.574872                | -2.135876 | 0.585525  |
| 10               | 1                | 0              | 1.108502                | -1.902593 | 0.384796  |
| 11               | 6                | 0              | -0.288545               | 0.298336  | -0.360509 |
| 12               | 6                | 0              | -0.949637               | -0.712441 | -1.007123 |
| 13               | 6                | 0              | -0.919889               | 1.564069  | 0.028232  |
| 14               | 1                | 0              | -0.333179               | -1.462135 | -1.499300 |
| 15               | 1                | 0              | -0.269316               | 2.240483  | 0.614935  |
| 16               | 8                | 0              | -2.044474               | 1.904232  | -0.262216 |
| 17               | 7                | 0              | -2.271383               | -0.939105 | -1.181788 |
| 18               | 1                | 0              | -2.491666               | -1.625950 | -1.887530 |
| 19               | 6                | 0              | -3.383204               | -0.558737 | -0.390752 |
| 20               | 6                | 0              | -3.262358               | -0.333670 | 0.977504  |
| 21               | 6                | 0              | -4.633552               | -0.501393 | -1.001398 |
| 22               | 6                | 0              | -4.394571               | -0.042192 | 1.725668  |
| 23               | 1                | 0              | -2.289721               | -0.392204 | 1.450444  |
| 24               | 6                | 0              | -5.761155               | -0.214715 | -0.243861 |
| 25               | 1                | 0              | -4.716095               | -0.667086 | -2.070134 |
| 26               | 6                | 0              | -5.646396               | 0.019715  | 1.122140  |
| 27               | 1                | 0              | -4.295514               | 0.136387  | 2.789596  |
| 28               | 1                | 0              | -6.729928               | -0.165030 | -0.726150 |
| 29               | 1                | 0              | -6.524845               | 0.252570  | 1.711105  |
| 30               | 7                | 0              | 5.382922                | -0.218111 | 0.246183  |
| 31               | 8                | 0              | 5.816281                | -1.308163 | 0.554034  |
| 32               | 8                | 0              | 6.061214                | 0.767916  | 0.052353  |

## Structure 28f (CHCl<sub>3</sub>)

Energy (Hartrees): -913.780309429

No imaginary frequencies

Standard orientation:

| Center<br>Number | Atomic<br>Number | Atomic<br>Type | Coordinates (Angstroms) |           |           |
|------------------|------------------|----------------|-------------------------|-----------|-----------|
|                  |                  |                | X                       | Y         | Z         |
| 1                | 6                | 0              | 2.029405                | 1.262060  | -0.436891 |
| 2                | 6                | 0              | 3.399569                | 1.144690  | -0.274905 |
| 3                | 6                | 0              | 3.923236                | -0.086550 | 0.097820  |
| 4                | 6                | 0              | 3.116365                | -1.194093 | 0.319227  |
| 5                | 6                | 0              | 1.746261                | -1.054111 | 0.171525  |
| 6                | 6                | 0              | 1.173876                | 0.168282  | -0.216962 |
| 7                | 1                | 0              | 1.624383                | 2.210144  | -0.770112 |
| 8                | 1                | 0              | 4.057675                | 1.984899  | -0.452475 |
| 9                | 1                | 0              | 3.554108                | -2.135489 | 0.623868  |
| 10               | 1                | 0              | 1.104746                | -1.899645 | 0.390970  |
| 11               | 6                | 0              | -0.285650               | 0.294869  | -0.392098 |
| 12               | 6                | 0              | -0.956928               | -0.753370 | -0.979685 |
| 13               | 6                | 0              | -0.902350               | 1.578769  | -0.076112 |
| 14               | 1                | 0              | -0.351786               | -1.525467 | -1.449733 |
| 15               | 1                | 0              | -0.258210               | 2.277406  | 0.487664  |
| 16               | 8                | 0              | -2.022517               | 1.924665  | -0.402279 |
| 17               | 7                | 0              | -2.274321               | -0.993494 | -1.119415 |
| 18               | 1                | 0              | -2.496958               | -1.722323 | -1.785796 |
| 19               | 6                | 0              | -3.383630               | -0.573517 | -0.348737 |
| 20               | 6                | 0              | -3.258670               | -0.222669 | 0.994042  |
| 21               | 6                | 0              | -4.642334               | -0.612036 | -0.947434 |
| 22               | 6                | 0              | -4.395215               | 0.096950  | 1.726646  |
| 23               | 1                | 0              | -2.283507               | -0.210877 | 1.465282  |
| 24               | 6                | 0              | -5.772365               | -0.290239 | -0.206496 |
| 25               | 1                | 0              | -4.726905               | -0.889942 | -1.992744 |
| 26               | 6                | 0              | -5.653915               | 0.069327  | 1.133110  |
| 27               | 1                | 0              | -4.293112               | 0.368861  | 2.770919  |
| 28               | 1                | 0              | -6.746659               | -0.318046 | -0.680500 |
| 29               | 1                | 0              | -6.534953               | 0.324558  | 1.709964  |
| 30               | 7                | 0              | 5.373134                | -0.219309 | 0.272432  |
| 31               | 8                | 0              | 5.813624                | -1.308560 | 0.583921  |
| 32               | 8                | 0              | 6.063088                | 0.765816  | 0.097518  |

## Structure 28f (DMSO)

Energy (Hartrees): -913.780864937

No imaginary frequencies

Standard orientation:

| Center<br>Number | Atomic<br>Number | Atomic<br>Type | Coordinates (Angstroms) |           |           |
|------------------|------------------|----------------|-------------------------|-----------|-----------|
|                  |                  |                | X                       | Y         | Z         |
| 1                | 6                | 0              | 2.029955                | 1.272408  | -0.427115 |
| 2                | 6                | 0              | 3.397906                | 1.147609  | -0.253570 |
| 3                | 6                | 0              | 3.914530                | -0.090963 | 0.106693  |
| 4                | 6                | 0              | 3.100610                | -1.198634 | 0.304687  |
| 5                | 6                | 0              | 1.732924                | -1.051867 | 0.146181  |
| 6                | 6                | 0              | 1.168046                | 0.178339  | -0.231253 |
| 7                | 1                | 0              | 1.634088                | 2.227557  | -0.750633 |
| 8                | 1                | 0              | 4.057459                | 1.990290  | -0.413503 |
| 9                | 1                | 0              | 3.527720                | -2.148424 | 0.598132  |
| 10               | 1                | 0              | 1.087714                | -1.899957 | 0.343608  |
| 11               | 6                | 0              | -0.288425               | 0.307879  | -0.419149 |
| 12               | 6                | 0              | -0.958160               | -0.752653 | -0.990338 |
| 13               | 6                | 0              | -0.902879               | 1.596992  | -0.128597 |
| 14               | 1                | 0              | -0.355532               | -1.531171 | -1.452406 |
| 15               | 1                | 0              | -0.263773               | 2.298701  | 0.436149  |
| 16               | 8                | 0              | -2.016868               | 1.948275  | -0.475757 |
| 17               | 7                | 0              | -2.274407               | -0.996209 | -1.117219 |
| 18               | 1                | 0              | -2.499588               | -1.741607 | -1.766354 |
| 19               | 6                | 0              | -3.374753               | -0.573190 | -0.339202 |
| 20               | 6                | 0              | -3.235377               | -0.172642 | 0.989085  |
| 21               | 6                | 0              | -4.644116               | -0.662784 | -0.912447 |
| 22               | 6                | 0              | -4.367317               | 0.141391  | 1.732124  |
| 23               | 1                | 0              | -2.253601               | -0.119651 | 1.443457  |
| 24               | 6                | 0              | -5.768747               | -0.342128 | -0.162187 |
| 25               | 1                | 0              | -4.739466               | -0.987201 | -1.943453 |
| 26               | 6                | 0              | -5.636100               | 0.064482  | 1.163281  |
| 27               | 1                | 0              | -4.253433               | 0.447915  | 2.765770  |
| 28               | 1                | 0              | -6.750609               | -0.413393 | -0.616206 |
| 29               | 1                | 0              | -6.513035               | 0.315974  | 1.748369  |
| 30               | 7                | 0              | 5.360844                | -0.232424 | 0.288072  |
| 31               | 8                | 0              | 5.795742                | -1.325620 | 0.598706  |
| 32               | 8                | 0              | 6.059678                | 0.749341  | 0.119794  |

## Structure 28f (C<sub>2</sub>H<sub>5</sub>OH)

Energy (Hartrees): -913.782601479

No imaginary frequencies

Standard orientation:

| Center<br>Number | Atomic<br>Number | Atomic<br>Type | Coordinates (Angstroms) |           |           |
|------------------|------------------|----------------|-------------------------|-----------|-----------|
|                  |                  |                | X                       | Y         | Z         |
| 1                | 6                | 0              | 2.023968                | 1.273260  | -0.426684 |
| 2                | 6                | 0              | 3.392382                | 1.154086  | -0.258192 |
| 3                | 6                | 0              | 3.913547                | -0.081736 | 0.106655  |
| 4                | 6                | 0              | 3.104648                | -1.191540 | 0.315880  |
| 5                | 6                | 0              | 1.736274                | -1.049291 | 0.162521  |
| 6                | 6                | 0              | 1.166973                | 0.177231  | -0.220493 |
| 7                | 1                | 0              | 1.624044                | 2.224634  | -0.756351 |
| 8                | 1                | 0              | 4.048116                | 1.997712  | -0.428664 |
| 9                | 1                | 0              | 3.535610                | -2.138216 | 0.614163  |
| 10               | 1                | 0              | 1.094263                | -1.897951 | 0.368532  |
| 11               | 6                | 0              | -0.290439               | 0.299260  | -0.406834 |
| 12               | 6                | 0              | -0.954346               | -0.769918 | -0.977762 |
| 13               | 6                | 0              | -0.909152               | 1.579076  | -0.123227 |
| 14               | 1                | 0              | -0.344348               | -1.540002 | -1.444319 |
| 15               | 1                | 0              | -0.275799               | 2.295355  | 0.426298  |
| 16               | 8                | 0              | -2.036165               | 1.918126  | -0.461914 |
| 17               | 7                | 0              | -2.264622               | -1.028363 | -1.098759 |
| 18               | 1                | 0              | -2.485746               | -1.779842 | -1.742755 |
| 19               | 6                | 0              | -3.371619               | -0.589912 | -0.333448 |
| 20               | 6                | 0              | -3.240123               | -0.218015 | 1.003332  |
| 21               | 6                | 0              | -4.631251               | -0.630710 | -0.929945 |
| 22               | 6                | 0              | -4.373043               | 0.122106  | 1.732982  |
| 23               | 1                | 0              | -2.263824               | -0.206987 | 1.473275  |
| 24               | 6                | 0              | -5.757573               | -0.287310 | -0.191800 |
| 25               | 1                | 0              | -4.719662               | -0.932390 | -1.968380 |
| 26               | 6                | 0              | -5.633470               | 0.093720  | 1.141675  |
| 27               | 1                | 0              | -4.267101               | 0.408029  | 2.773350  |
| 28               | 1                | 0              | -6.733558               | -0.319018 | -0.662568 |
| 29               | 1                | 0              | -6.511859               | 0.362691  | 1.716890  |
| 30               | 7                | 0              | 5.357334                | -0.218548 | 0.277009  |
| 31               | 8                | 0              | 5.803889                | -1.312348 | 0.571329  |
| 32               | 8                | 0              | 6.056056                | 0.765788  | 0.117439  |

## Structure 28g (vacuum)

Energy (Hartrees): -913.761064382

No imaginary frequencies

Standard orientation:

| Center<br>Number | Atomic<br>Number | Atomic<br>Type | Coordinates (Angstroms) |           |           |
|------------------|------------------|----------------|-------------------------|-----------|-----------|
|                  |                  |                | X                       | Y         | Z         |
| 1                | 6                | 0              | -1.593567               | -0.526378 | -0.750556 |
| 2                | 6                | 0              | -2.871377               | -1.063226 | -0.752558 |
| 3                | 6                | 0              | -3.864736               | -0.412243 | -0.036718 |
| 4                | 6                | 0              | -3.616776               | 0.747100  | 0.682573  |
| 5                | 6                | 0              | -2.329594               | 1.260064  | 0.689015  |
| 6                | 6                | 0              | -1.299531               | 0.641981  | -0.033589 |
| 7                | 1                | 0              | -0.820082               | -1.006409 | -1.338656 |
| 8                | 1                | 0              | -3.111212               | -1.960206 | -1.307483 |
| 9                | 1                | 0              | -4.418723               | 1.215969  | 1.236766  |
| 10               | 1                | 0              | -2.112097               | 2.138224  | 1.285387  |
| 11               | 6                | 0              | 0.063685                | 1.206911  | -0.042534 |
| 12               | 6                | 0              | 0.253266                | 2.558171  | -0.104075 |
| 13               | 6                | 0              | 1.216439                | 0.328905  | -0.011938 |
| 14               | 1                | 0              | -0.588477               | 3.243269  | -0.161651 |
| 15               | 1                | 0              | 1.034425                | -0.748874 | 0.052233  |
| 16               | 8                | 0              | 1.421734                | 3.152614  | -0.130360 |
| 17               | 1                | 0              | 2.118625                | 2.429331  | -0.105129 |
| 18               | 7                | 0              | 2.416217                | 0.790300  | -0.050118 |
| 19               | 6                | 0              | 3.518832                | -0.085393 | 0.046007  |
| 20               | 6                | 0              | 3.525615                | -1.198105 | 0.891451  |
| 21               | 6                | 0              | 4.653117                | 0.210316  | -0.712869 |
| 22               | 6                | 0              | 4.643542                | -2.022881 | 0.943033  |
| 23               | 1                | 0              | 2.672795                | -1.397268 | 1.530416  |
| 24               | 6                | 0              | 5.762643                | -0.621388 | -0.661067 |
| 25               | 1                | 0              | 4.641559                | 1.089053  | -1.346881 |
| 26               | 6                | 0              | 5.761372                | -1.743129 | 0.164196  |
| 27               | 1                | 0              | 4.644674                | -2.880389 | 1.605526  |
| 28               | 1                | 0              | 6.633990                | -0.389921 | -1.262115 |
| 29               | 1                | 0              | 6.631425                | -2.386675 | 0.209581  |
| 30               | 7                | 0              | -5.228320               | -0.972629 | -0.037559 |
| 31               | 8                | 0              | -6.081416               | -0.372947 | 0.580747  |
| 32               | 8                | 0              | -5.412788               | -1.998922 | -0.656195 |



## Structure 28g (CHCl<sub>3</sub>)

Energy (Hartrees): -913.784878794

No imaginary frequencies

Standard orientation:

| Center<br>Number | Atomic<br>Number | Atomic<br>Type | Coordinates (Angstroms) |           |           |
|------------------|------------------|----------------|-------------------------|-----------|-----------|
|                  |                  |                | X                       | Y         | Z         |
| 1                | 6                | 0              | -1.594015               | -0.566072 | -0.709670 |
| 2                | 6                | 0              | -2.875461               | -1.092841 | -0.713148 |
| 3                | 6                | 0              | -3.874718               | -0.411979 | -0.031344 |
| 4                | 6                | 0              | -3.627940               | 0.767388  | 0.658579  |
| 5                | 6                | 0              | -2.337807               | 1.270600  | 0.666860  |
| 6                | 6                | 0              | -1.302302               | 0.622717  | -0.024048 |
| 7                | 1                | 0              | -0.819172               | -1.073705 | -1.272286 |
| 8                | 1                | 0              | -3.105242               | -2.003798 | -1.249673 |
| 9                | 1                | 0              | -4.427450               | 1.265826  | 1.190518  |
| 10               | 1                | 0              | -2.123726               | 2.167420  | 1.236191  |
| 11               | 6                | 0              | 0.061501                | 1.185760  | -0.037040 |
| 12               | 6                | 0              | 0.246022                | 2.538364  | -0.093317 |
| 13               | 6                | 0              | 1.216420                | 0.309540  | -0.012559 |
| 14               | 1                | 0              | -0.593055               | 3.227289  | -0.142323 |
| 15               | 1                | 0              | 1.041533                | -0.768038 | 0.051151  |
| 16               | 8                | 0              | 1.419659                | 3.129020  | -0.123792 |
| 17               | 1                | 0              | 2.115618                | 2.398153  | -0.105246 |
| 18               | 7                | 0              | 2.413535                | 0.780963  | -0.054109 |
| 19               | 6                | 0              | 3.525926                | -0.083335 | 0.039648  |
| 20               | 6                | 0              | 3.536689                | -1.210464 | 0.867369  |
| 21               | 6                | 0              | 4.665610                | 0.239929  | -0.701529 |
| 22               | 6                | 0              | 4.665164                | -2.021933 | 0.918144  |
| 23               | 1                | 0              | 2.675412                | -1.436666 | 1.486334  |
| 24               | 6                | 0              | 5.786118                | -0.579055 | -0.650035 |
| 25               | 1                | 0              | 4.652177                | 1.128446  | -1.322924 |
| 26               | 6                | 0              | 5.790035                | -1.714297 | 0.157866  |
| 27               | 1                | 0              | 4.668640                | -2.891787 | 1.565277  |
| 28               | 1                | 0              | 6.661317                | -0.326904 | -1.238002 |
| 29               | 1                | 0              | 6.668085                | -2.347948 | 0.202123  |
| 30               | 7                | 0              | -5.237634               | -0.955843 | -0.042119 |
| 31               | 8                | 0              | -6.113178               | -0.312761 | 0.502117  |
| 32               | 8                | 0              | -5.423093               | -2.021265 | -0.596102 |

## Structure 28g (DMSO)

Energy (Hartrees): -913.782699947

No imaginary frequencies

Standard orientation:

| Center<br>Number | Atomic<br>Number | Atomic<br>Type | Coordinates (Angstroms) |           |           |
|------------------|------------------|----------------|-------------------------|-----------|-----------|
|                  |                  |                | X                       | Y         | Z         |
| 1                | 6                | 0              | -1.586232               | -0.580699 | -0.675245 |
| 2                | 6                | 0              | -2.866892               | -1.108828 | -0.681095 |
| 3                | 6                | 0              | -3.877064               | -0.409579 | -0.034044 |
| 4                | 6                | 0              | -3.639798               | 0.791791  | 0.621799  |
| 5                | 6                | 0              | -2.351372               | 1.298391  | 0.631428  |
| 6                | 6                | 0              | -1.304932               | 0.629767  | -0.023381 |
| 7                | 1                | 0              | -0.802240               | -1.107909 | -1.206195 |
| 8                | 1                | 0              | -3.082577               | -2.038103 | -1.191364 |
| 9                | 1                | 0              | -4.443740               | 1.308365  | 1.129048  |
| 10               | 1                | 0              | -2.152024               | 2.215585  | 1.172963  |
| 11               | 6                | 0              | 0.060441                | 1.187305  | -0.032130 |
| 12               | 6                | 0              | 0.254031                | 2.540042  | -0.085738 |
| 13               | 6                | 0              | 1.210217                | 0.305417  | -0.009024 |
| 14               | 1                | 0              | -0.579859               | 3.235509  | -0.131214 |
| 15               | 1                | 0              | 1.032685                | -0.771172 | 0.050059  |
| 16               | 8                | 0              | 1.433418                | 3.117987  | -0.116827 |
| 17               | 1                | 0              | 2.118643                | 2.372292  | -0.101450 |
| 18               | 7                | 0              | 2.409094                | 0.776470  | -0.048023 |
| 19               | 6                | 0              | 3.522401                | -0.086899 | 0.040210  |
| 20               | 6                | 0              | 3.528692                | -1.231823 | 0.844021  |
| 21               | 6                | 0              | 4.668700                | 0.255931  | -0.682373 |
| 22               | 6                | 0              | 4.661375                | -2.038015 | 0.891165  |
| 23               | 1                | 0              | 2.661110                | -1.477115 | 1.446687  |
| 24               | 6                | 0              | 5.793848                | -0.557654 | -0.633852 |
| 25               | 1                | 0              | 4.659054                | 1.156426  | -1.286792 |
| 26               | 6                | 0              | 5.793961                | -1.709751 | 0.150167  |
| 27               | 1                | 0              | 4.660869                | -2.921821 | 1.519417  |
| 28               | 1                | 0              | 6.674191                | -0.289542 | -1.207166 |
| 29               | 1                | 0              | 6.674487                | -2.340427 | 0.191810  |
| 30               | 7                | 0              | -5.236734               | -0.957134 | -0.042653 |
| 31               | 8                | 0              | -6.116834               | -0.314916 | 0.498302  |
| 32               | 8                | 0              | -5.420503               | -2.026798 | -0.591790 |

## Structure 28g (C<sub>2</sub>H<sub>5</sub>OH)

Energy (Hartrees): -913.782594512

No imaginary frequencies

Standard orientation:

| Center<br>Number | Atomic<br>Number | Atomic<br>Type | Coordinates (Angstroms) |           |           |
|------------------|------------------|----------------|-------------------------|-----------|-----------|
|                  |                  |                | X                       | Y         | Z         |
| 1                | 6                | 0              | -1.579442               | -0.568095 | -0.687139 |
| 2                | 6                | 0              | -2.856647               | -1.103037 | -0.692981 |
| 3                | 6                | 0              | -3.868066               | -0.412291 | -0.037876 |
| 4                | 6                | 0              | -3.637290               | 0.788014  | 0.623108  |
| 5                | 6                | 0              | -2.351711               | 1.300584  | 0.632242  |
| 6                | 6                | 0              | -1.303155               | 0.639555  | -0.027391 |
| 7                | 1                | 0              | -0.794372               | -1.087474 | -1.224283 |
| 8                | 1                | 0              | -3.068858               | -2.029746 | -1.209618 |
| 9                | 1                | 0              | -4.442708               | 1.297494  | 1.135680  |
| 10               | 1                | 0              | -2.154950               | 2.215457  | 1.178632  |
| 11               | 6                | 0              | 0.060472                | 1.201513  | -0.032791 |
| 12               | 6                | 0              | 0.246928                | 2.553262  | -0.081375 |
| 13               | 6                | 0              | 1.211918                | 0.319022  | -0.010292 |
| 14               | 1                | 0              | -0.587361               | 3.247833  | -0.125770 |
| 15               | 1                | 0              | 1.032184                | -0.757254 | 0.049761  |
| 16               | 8                | 0              | 1.427432                | 3.139450  | -0.109149 |
| 17               | 1                | 0              | 2.121861                | 2.405742  | -0.096438 |
| 18               | 7                | 0              | 2.410817                | 0.786668  | -0.049758 |
| 19               | 6                | 0              | 3.518169                | -0.085238 | 0.039710  |
| 20               | 6                | 0              | 3.520894                | -1.218144 | 0.860022  |
| 21               | 6                | 0              | 4.661210                | 0.236972  | -0.697049 |
| 22               | 6                | 0              | 4.646210                | -2.034526 | 0.909170  |
| 23               | 1                | 0              | 2.656231                | -1.445482 | 1.474100  |
| 24               | 6                | 0              | 5.778593                | -0.587145 | -0.647250 |
| 25               | 1                | 0              | 4.655497                | 1.129279  | -1.313611 |
| 26               | 6                | 0              | 5.774882                | -1.727865 | 0.153289  |
| 27               | 1                | 0              | 4.643270                | -2.908958 | 1.550566  |
| 28               | 1                | 0              | 6.656556                | -0.335392 | -1.231718 |
| 29               | 1                | 0              | 6.649935                | -2.366197 | 0.196394  |
| 30               | 7                | 0              | -5.219271               | -0.968618 | -0.041671 |
| 31               | 8                | 0              | -6.109400               | -0.329830 | 0.488268  |
| 32               | 8                | 0              | -5.398770               | -2.048014 | -0.574627 |

## Structure 29a (vacuum)

Energy (Hartrees): -1028.28159041

No imaginary frequencies

Standard orientation:

| Center<br>Number | Atomic<br>Number | Atomic<br>Type | Coordinates (Angstroms) |           |           |
|------------------|------------------|----------------|-------------------------|-----------|-----------|
|                  |                  |                | X                       | Y         | Z         |
| 1                | 6                | 0              | -3.225624               | 1.251910  | 0.581115  |
| 2                | 6                | 0              | -4.456164               | 0.625455  | 0.693757  |
| 3                | 6                | 0              | -4.622843               | -0.622060 | 0.110762  |
| 4                | 6                | 0              | -3.601824               | -1.249672 | -0.587915 |
| 5                | 6                | 0              | -2.384048               | -0.600371 | -0.707633 |
| 6                | 6                | 0              | -2.166018               | 0.655030  | -0.119441 |
| 7                | 1                | 0              | -3.075190               | 2.206780  | 1.070465  |
| 8                | 1                | 0              | -5.275333               | 1.077209  | 1.236854  |
| 9                | 1                | 0              | -3.778028               | -2.216174 | -1.040864 |
| 10               | 1                | 0              | -1.596792               | -1.060805 | -1.293320 |
| 11               | 6                | 0              | -0.865125               | 1.337002  | -0.229778 |
| 12               | 6                | 0              | 0.306869                | 0.616999  | -0.148722 |
| 13               | 6                | 0              | -0.819642               | 2.773725  | -0.413092 |
| 14               | 1                | 0              | 0.262510                | -0.454540 | 0.025558  |
| 15               | 1                | 0              | -1.796205               | 3.276605  | -0.523725 |
| 16               | 8                | 0              | 0.206793                | 3.438381  | -0.473844 |
| 17               | 7                | 0              | 1.536343                | 1.135484  | -0.225408 |
| 18               | 1                | 0              | 1.575807                | 2.150418  | -0.316138 |
| 19               | 6                | 0              | 2.740160                | 0.403256  | -0.136952 |
| 20               | 6                | 0              | 3.870850                | 1.030330  | 0.371493  |
| 21               | 6                | 0              | 2.831271                | -0.923310 | -0.567800 |
| 22               | 6                | 0              | 5.081168                | 0.350509  | 0.468428  |
| 23               | 1                | 0              | 3.804859                | 2.059374  | 0.706732  |
| 24               | 6                | 0              | 4.026187                | -1.609390 | -0.456612 |
| 25               | 1                | 0              | 1.976415                | -1.414292 | -1.017095 |
| 26               | 6                | 0              | 5.161005                | -0.980141 | 0.061535  |
| 27               | 1                | 0              | 5.942060                | 0.867313  | 0.869516  |
| 28               | 1                | 0              | 4.113876                | -2.635744 | -0.790310 |
| 29               | 8                | 0              | 6.285040                | -1.736365 | 0.117567  |
| 30               | 6                | 0              | 7.462874                | -1.128774 | 0.607792  |
| 31               | 1                | 0              | 7.338665                | -0.808475 | 1.646993  |
| 32               | 1                | 0              | 8.238486                | -1.889049 | 0.553480  |
| 33               | 1                | 0              | 7.750252                | -0.271149 | -0.008436 |
| 34               | 7                | 0              | -5.924406               | -1.299699 | 0.234104  |
| 35               | 8                | 0              | -6.040421               | -2.392164 | -0.279934 |
| 36               | 8                | 0              | -6.801351               | -0.724972 | 0.843436  |

## Structure 29a (CHCl<sub>3</sub>)

Energy (Hartrees): -1028.30877342

No imaginary frequencies

Standard orientation:

| Center<br>Number | Atomic<br>Number | Atomic<br>Type | Coordinates (Angstroms) |           |           |
|------------------|------------------|----------------|-------------------------|-----------|-----------|
|                  |                  |                | X                       | Y         | Z         |
| 1                | 6                | 0              | -3.247461               | 1.276409  | 0.525403  |
| 2                | 6                | 0              | -4.475262               | 0.646710  | 0.637340  |
| 3                | 6                | 0              | -4.619868               | -0.629711 | 0.109598  |
| 4                | 6                | 0              | -3.574212               | -1.282142 | -0.532114 |
| 5                | 6                | 0              | -2.359061               | -0.630313 | -0.652376 |
| 6                | 6                | 0              | -2.164655               | 0.656386  | -0.121584 |
| 7                | 1                | 0              | -3.119682               | 2.253677  | 0.975452  |
| 8                | 1                | 0              | -5.303689               | 1.125299  | 1.142592  |
| 9                | 1                | 0              | -3.720592               | -2.271979 | -0.944063 |
| 10               | 1                | 0              | -1.555185               | -1.121081 | -1.188557 |
| 11               | 6                | 0              | -0.867750               | 1.345688  | -0.227774 |
| 12               | 6                | 0              | 0.310512                | 0.623701  | -0.159074 |
| 13               | 6                | 0              | -0.833013               | 2.778427  | -0.399935 |
| 14               | 1                | 0              | 0.268683                | -0.451707 | -0.011943 |
| 15               | 1                | 0              | -1.808190               | 3.278074  | -0.522616 |
| 16               | 8                | 0              | 0.192522                | 3.455815  | -0.446760 |
| 17               | 7                | 0              | 1.535319                | 1.143588  | -0.219188 |
| 18               | 1                | 0              | 1.588678                | 2.159477  | -0.283148 |
| 19               | 6                | 0              | 2.741026                | 0.408546  | -0.142317 |
| 20               | 6                | 0              | 3.864794                | 1.024690  | 0.395738  |
| 21               | 6                | 0              | 2.835467                | -0.904937 | -0.609747 |
| 22               | 6                | 0              | 5.075052                | 0.343610  | 0.488338  |
| 23               | 1                | 0              | 3.793974                | 2.045610  | 0.755410  |
| 24               | 6                | 0              | 4.031917                | -1.591760 | -0.505786 |
| 25               | 1                | 0              | 1.984432                | -1.385772 | -1.077400 |
| 26               | 6                | 0              | 5.160163                | -0.975841 | 0.044288  |
| 27               | 1                | 0              | 5.930469                | 0.849278  | 0.915718  |
| 28               | 1                | 0              | 4.118991                | -2.609359 | -0.867857 |
| 29               | 8                | 0              | 6.285183                | -1.731042 | 0.094640  |
| 30               | 6                | 0              | 7.455273                | -1.139755 | 0.637639  |
| 31               | 1                | 0              | 7.304517                | -0.858291 | 1.684118  |
| 32               | 1                | 0              | 8.231456                | -1.900306 | 0.577438  |
| 33               | 1                | 0              | 7.760235                | -0.263486 | 0.057867  |
| 34               | 7                | 0              | -5.911394               | -1.308637 | 0.235469  |
| 35               | 8                | 0              | -6.015072               | -2.431606 | -0.219230 |
| 36               | 8                | 0              | -6.817521               | -0.717209 | 0.789750  |

## Structure 29a (DMSO)

Energy (Hartrees): -1028.30837106

No imaginary frequencies

Standard orientation:

| Center<br>Number | Atomic<br>Number | Atomic<br>Type | Coordinates (Angstroms) |           |           |
|------------------|------------------|----------------|-------------------------|-----------|-----------|
|                  |                  |                | X                       | Y         | Z         |
| 1                | 6                | 0              | -3.256469               | 1.279230  | 0.529433  |
| 2                | 6                | 0              | -4.491192               | 0.660546  | 0.623410  |
| 3                | 6                | 0              | -4.641001               | -0.612874 | 0.088426  |
| 4                | 6                | 0              | -3.592788               | -1.272879 | -0.542254 |
| 5                | 6                | 0              | -2.370074               | -0.632545 | -0.645019 |
| 6                | 6                | 0              | -2.171547               | 0.651081  | -0.107153 |
| 7                | 1                | 0              | -3.126578               | 2.254221  | 0.984153  |
| 8                | 1                | 0              | -5.319644               | 1.147446  | 1.120760  |
| 9                | 1                | 0              | -3.739399               | -2.259788 | -0.961196 |
| 10               | 1                | 0              | -1.563948               | -1.130374 | -1.171379 |
| 11               | 6                | 0              | -0.867978               | 1.328607  | -0.198503 |
| 12               | 6                | 0              | 0.301006                | 0.590503  | -0.127160 |
| 13               | 6                | 0              | -0.823914               | 2.761621  | -0.364217 |
| 14               | 1                | 0              | 0.240587                | -0.483635 | 0.018986  |
| 15               | 1                | 0              | -1.796724               | 3.265394  | -0.486622 |
| 16               | 8                | 0              | 0.204549                | 3.435811  | -0.403927 |
| 17               | 7                | 0              | 1.531343                | 1.095862  | -0.189260 |
| 18               | 1                | 0              | 1.600212                | 2.109845  | -0.264497 |
| 19               | 6                | 0              | 2.737085                | 0.364306  | -0.108256 |
| 20               | 6                | 0              | 3.896464                | 1.050123  | 0.238104  |
| 21               | 6                | 0              | 2.806926                | -1.004336 | -0.383638 |
| 22               | 6                | 0              | 5.119091                | 0.390453  | 0.326752  |
| 23               | 1                | 0              | 3.844381                | 2.113695  | 0.446917  |
| 24               | 6                | 0              | 4.018140                | -1.666794 | -0.284488 |
| 25               | 1                | 0              | 1.927872                | -1.558080 | -0.690760 |
| 26               | 6                | 0              | 5.183286                | -0.979398 | 0.071174  |
| 27               | 1                | 0              | 6.000924                | 0.955699  | 0.598172  |
| 28               | 1                | 0              | 4.080736                | -2.727586 | -0.498203 |
| 29               | 8                | 0              | 6.317847                | -1.717862 | 0.132174  |
| 30               | 6                | 0              | 7.520849                | -1.046851 | 0.480404  |
| 31               | 1                | 0              | 7.452434                | -0.612490 | 1.481919  |
| 32               | 1                | 0              | 8.302403                | -1.804186 | 0.467466  |
| 33               | 1                | 0              | 7.760242                | -0.264706 | -0.245720 |
| 34               | 7                | 0              | -5.939462               | -1.278393 | 0.193587  |
| 35               | 8                | 0              | -6.044601               | -2.407283 | -0.249244 |
| 36               | 8                | 0              | -6.854540               | -0.672229 | 0.719450  |

## Structure 29a (C<sub>2</sub>H<sub>5</sub>OH)

Energy (Hartrees): -1028.30919811

No imaginary frequencies

Standard orientation:

| Center<br>Number | Atomic<br>Number | Atomic<br>Type | Coordinates (Angstroms) |           |           |
|------------------|------------------|----------------|-------------------------|-----------|-----------|
|                  |                  |                | X                       | Y         | Z         |
| 1                | 6                | 0              | -3.248676               | 1.276737  | 0.536295  |
| 2                | 6                | 0              | -4.472769               | 0.640809  | 0.645245  |
| 3                | 6                | 0              | -4.611238               | -0.632763 | 0.106148  |
| 4                | 6                | 0              | -3.562958               | -1.276227 | -0.542402 |
| 5                | 6                | 0              | -2.350867               | -0.619085 | -0.656985 |
| 6                | 6                | 0              | -2.163806               | 0.665058  | -0.115990 |
| 7                | 1                | 0              | -3.126045               | 2.251907  | 0.992734  |
| 8                | 1                | 0              | -5.300181               | 1.115194  | 1.156340  |
| 9                | 1                | 0              | -3.700597               | -2.263163 | -0.964522 |
| 10               | 1                | 0              | -1.544552               | -1.104049 | -1.195039 |
| 11               | 6                | 0              | -0.869888               | 1.359525  | -0.218756 |
| 12               | 6                | 0              | 0.309769                | 0.632924  | -0.154949 |
| 13               | 6                | 0              | -0.843545               | 2.786524  | -0.385352 |
| 14               | 1                | 0              | 0.262307                | -0.442735 | -0.013590 |
| 15               | 1                | 0              | -1.819389               | 3.284235  | -0.498850 |
| 16               | 8                | 0              | 0.182907                | 3.472714  | -0.438218 |
| 17               | 7                | 0              | 1.533876                | 1.146591  | -0.215153 |
| 18               | 1                | 0              | 1.601491                | 2.161676  | -0.274684 |
| 19               | 6                | 0              | 2.737214                | 0.405752  | -0.142800 |
| 20               | 6                | 0              | 3.873035                | 1.035088  | 0.353519  |
| 21               | 6                | 0              | 2.815949                | -0.920995 | -0.573820 |
| 22               | 6                | 0              | 5.082357                | 0.352179  | 0.445966  |
| 23               | 1                | 0              | 3.813188                | 2.068051  | 0.680053  |
| 24               | 6                | 0              | 4.012864                | -1.608425 | -0.470972 |
| 25               | 1                | 0              | 1.954780                | -1.414665 | -1.008895 |
| 26               | 6                | 0              | 5.151747                | -0.980159 | 0.040794  |
| 27               | 1                | 0              | 5.948257                | 0.867626  | 0.839701  |
| 28               | 1                | 0              | 4.086968                | -2.637371 | -0.803995 |
| 29               | 8                | 0              | 6.278690                | -1.739343 | 0.095586  |
| 30               | 6                | 0              | 7.451212                | -1.142973 | 0.637405  |
| 31               | 1                | 0              | 7.289538                | -0.838871 | 1.675309  |
| 32               | 1                | 0              | 8.221982                | -1.910512 | 0.599231  |
| 33               | 1                | 0              | 7.764363                | -0.281442 | 0.041468  |
| 34               | 7                | 0              | -5.894595               | -1.315255 | 0.227028  |
| 35               | 8                | 0              | -6.003755               | -2.434767 | -0.240349 |
| 36               | 8                | 0              | -6.806527               | -0.738485 | 0.791924  |

## Structure 29b (vacuum)

Energy (Hartrees): -1028.27502628

No imaginary frequencies

Standard orientation:

| Center<br>Number | Atomic<br>Number | Atomic<br>Type | Coordinates (Angstroms) |           |           |
|------------------|------------------|----------------|-------------------------|-----------|-----------|
|                  |                  |                | X                       | Y         | Z         |
| 1                | 6                | 0              | -3.070535               | 1.177997  | -0.811635 |
| 2                | 6                | 0              | -4.164104               | 0.325868  | -0.824346 |
| 3                | 6                | 0              | -4.178167               | -0.746345 | 0.054980  |
| 4                | 6                | 0              | -3.145697               | -0.982078 | 0.950773  |
| 5                | 6                | 0              | -2.064466               | -0.114047 | 0.957294  |
| 6                | 6                | 0              | -2.001447               | 0.973451  | 0.072235  |
| 7                | 1                | 0              | -3.031491               | 2.003533  | -1.512743 |
| 8                | 1                | 0              | -4.990205               | 0.470578  | -1.507384 |
| 9                | 1                | 0              | -3.208740               | -1.819644 | 1.632497  |
| 10               | 1                | 0              | -1.270698               | -0.257721 | 1.682325  |
| 11               | 6                | 0              | -0.852502               | 1.896238  | 0.070701  |
| 12               | 6                | 0              | 0.448386                | 1.490571  | 0.048688  |
| 13               | 6                | 0              | -1.087067               | 3.346046  | 0.049928  |
| 14               | 1                | 0              | 1.206964                | 2.267869  | 0.041230  |
| 15               | 1                | 0              | -2.153213               | 3.643173  | 0.090771  |
| 16               | 8                | 0              | -0.221597               | 4.191939  | 0.012073  |
| 17               | 7                | 0              | 0.898263                | 0.222410  | -0.016678 |
| 18               | 1                | 0              | 0.215141                | -0.512371 | -0.147670 |
| 19               | 6                | 0              | 2.255253                | -0.166344 | -0.054305 |
| 20               | 6                | 0              | 2.591291                | -1.379455 | -0.663341 |
| 21               | 6                | 0              | 3.260163                | 0.611586  | 0.505470  |
| 22               | 6                | 0              | 3.907068                | -1.793810 | -0.720782 |
| 23               | 1                | 0              | 1.813550                | -1.993295 | -1.105115 |
| 24               | 6                | 0              | 4.592217                | 0.207599  | 0.430463  |
| 25               | 1                | 0              | 3.019797                | 1.532207  | 1.022576  |
| 26               | 6                | 0              | 4.922346                | -0.997522 | -0.183611 |
| 27               | 1                | 0              | 4.179112                | -2.729829 | -1.192199 |
| 28               | 1                | 0              | 5.351632                | 0.838591  | 0.871283  |
| 29               | 8                | 0              | 6.183249                | -1.483233 | -0.303132 |
| 30               | 6                | 0              | 7.239518                | -0.709040 | 0.227224  |
| 31               | 1                | 0              | 7.129567                | -0.579035 | 1.308546  |
| 32               | 1                | 0              | 8.152074                | -1.263047 | 0.020454  |
| 33               | 1                | 0              | 7.292132                | 0.271481  | -0.256503 |
| 34               | 7                | 0              | -5.330514               | -1.666778 | 0.040643  |
| 35               | 8                | 0              | -5.303275               | -2.610983 | 0.800782  |
| 36               | 8                | 0              | -6.232553               | -1.423498 | -0.731503 |



## Structure 29b (CHCl<sub>3</sub>)

Energy (Hartrees): -1028.30410560

No imaginary frequencies

Standard orientation:

| Center<br>Number | Atomic<br>Number | Atomic<br>Type | Coordinates (Angstroms) |           |           |
|------------------|------------------|----------------|-------------------------|-----------|-----------|
|                  |                  |                | X                       | Y         | Z         |
| 1                | 6                | 0              | -3.073305               | 1.187989  | -0.802050 |
| 2                | 6                | 0              | -4.168208               | 0.339172  | -0.825667 |
| 3                | 6                | 0              | -4.185931               | -0.742033 | 0.045046  |
| 4                | 6                | 0              | -3.157073               | -0.986482 | 0.944752  |
| 5                | 6                | 0              | -2.074562               | -0.121261 | 0.961819  |
| 6                | 6                | 0              | -2.007077               | 0.972860  | 0.084667  |
| 7                | 1                | 0              | -3.032133               | 2.018464  | -1.497808 |
| 8                | 1                | 0              | -4.985341               | 0.498127  | -1.516636 |
| 9                | 1                | 0              | -3.214249               | -1.827600 | 1.622907  |
| 10               | 1                | 0              | -1.282974               | -0.278940 | 1.686340  |
| 11               | 6                | 0              | -0.853678               | 1.891349  | 0.085835  |
| 12               | 6                | 0              | 0.454524                | 1.484655  | 0.079844  |
| 13               | 6                | 0              | -1.094022               | 3.329556  | 0.047665  |
| 14               | 1                | 0              | 1.212861                | 2.262078  | 0.073888  |
| 15               | 1                | 0              | -2.158947               | 3.623237  | 0.090594  |
| 16               | 8                | 0              | -0.234290               | 4.192187  | -0.006553 |
| 17               | 7                | 0              | 0.907159                | 0.224731  | 0.031022  |
| 18               | 1                | 0              | 0.232825                | -0.522548 | -0.089570 |
| 19               | 6                | 0              | 2.265253                | -0.164624 | -0.010330 |
| 20               | 6                | 0              | 2.580893                | -1.407883 | -0.567708 |
| 21               | 6                | 0              | 3.285660                | 0.636372  | 0.488086  |
| 22               | 6                | 0              | 3.895182                | -1.827559 | -0.643661 |
| 23               | 1                | 0              | 1.787219                | -2.039628 | -0.952965 |
| 24               | 6                | 0              | 4.614673                | 0.224229  | 0.396805  |
| 25               | 1                | 0              | 3.065728                | 1.582965  | 0.966991  |
| 26               | 6                | 0              | 4.926105                | -1.007996 | -0.173773 |
| 27               | 1                | 0              | 4.147237                | -2.787086 | -1.079624 |
| 28               | 1                | 0              | 5.387634                | 0.871770  | 0.788594  |
| 29               | 8                | 0              | 6.184577                | -1.496965 | -0.308366 |
| 30               | 6                | 0              | 7.259924                | -0.678601 | 0.122972  |
| 31               | 1                | 0              | 7.204605                | -0.486634 | 1.198689  |
| 32               | 1                | 0              | 8.168060                | -1.236691 | -0.096741 |
| 33               | 1                | 0              | 7.276325                | 0.269324  | -0.423033 |
| 34               | 7                | 0              | -5.332564               | -1.658636 | 0.014388  |
| 35               | 8                | 0              | -5.299969               | -2.638086 | 0.732505  |
| 36               | 8                | 0              | -6.255462               | -1.393131 | -0.729498 |

## Structure 29b (DMSO)

Energy (Hartrees): -1028.30448153

No imaginary frequencies

Standard orientation:

| Center<br>Number | Atomic<br>Number | Atomic<br>Type | Coordinates (Angstroms) |           |           |
|------------------|------------------|----------------|-------------------------|-----------|-----------|
|                  |                  |                | X                       | Y         | Z         |
| 1                | 6                | 0              | -3.136954               | 1.242000  | -0.709661 |
| 2                | 6                | 0              | -4.238232               | 0.402160  | -0.722117 |
| 3                | 6                | 0              | -4.203720               | -0.748013 | 0.055844  |
| 4                | 6                | 0              | -3.111501               | -1.070125 | 0.851148  |
| 5                | 6                | 0              | -2.022717               | -0.213827 | 0.859849  |
| 6                | 6                | 0              | -2.008578               | 0.951466  | 0.075264  |
| 7                | 1                | 0              | -3.143640               | 2.125916  | -1.337213 |
| 8                | 1                | 0              | -5.101449               | 0.626148  | -1.334975 |
| 9                | 1                | 0              | -3.120909               | -1.964586 | 1.459753  |
| 10               | 1                | 0              | -1.183082               | -0.443887 | 1.506231  |
| 11               | 6                | 0              | -0.857178               | 1.870180  | 0.074220  |
| 12               | 6                | 0              | 0.456834                | 1.475163  | 0.039219  |
| 13               | 6                | 0              | -1.105021               | 3.307076  | 0.091997  |
| 14               | 1                | 0              | 1.207412                | 2.259526  | 0.063905  |
| 15               | 1                | 0              | -2.166066               | 3.591910  | 0.212910  |
| 16               | 8                | 0              | -0.255386               | 4.178711  | 0.005647  |
| 17               | 7                | 0              | 0.923457                | 0.226312  | -0.063702 |
| 18               | 1                | 0              | 0.262175                | -0.527979 | -0.216927 |
| 19               | 6                | 0              | 2.284330                | -0.151464 | -0.078404 |
| 20               | 6                | 0              | 2.617791                | -1.387626 | -0.642226 |
| 21               | 6                | 0              | 3.289465                | 0.645148  | 0.458252  |
| 22               | 6                | 0              | 3.934646                | -1.805834 | -0.683004 |
| 23               | 1                | 0              | 1.835166                | -2.016059 | -1.054630 |
| 24               | 6                | 0              | 4.620997                | 0.233700  | 0.403391  |
| 25               | 1                | 0              | 3.057045                | 1.586330  | 0.941952  |
| 26               | 6                | 0              | 4.950875                | -0.993713 | -0.168806 |
| 27               | 1                | 0              | 4.196581                | -2.762252 | -1.120507 |
| 28               | 1                | 0              | 5.380316                | 0.877420  | 0.827261  |
| 29               | 8                | 0              | 6.212803                | -1.481816 | -0.261230 |
| 30               | 6                | 0              | 7.267750                | -0.663245 | 0.223683  |
| 31               | 1                | 0              | 7.160007                | -0.473089 | 1.295410  |
| 32               | 1                | 0              | 8.186477                | -1.219310 | 0.047209  |
| 33               | 1                | 0              | 7.308826                | 0.286475  | -0.317563 |
| 34               | 7                | 0              | -5.357538               | -1.652080 | 0.037935  |
| 35               | 8                | 0              | -5.298989               | -2.669688 | 0.701761  |
| 36               | 8                | 0              | -6.317554               | -1.342765 | -0.641721 |

## Structure 29b (C<sub>2</sub>H<sub>5</sub>OH)

Energy (Hartrees): -1028.30575914

No imaginary frequencies

Standard orientation:

| Center<br>Number | Atomic<br>Number | Atomic<br>Type | Coordinates (Angstroms) |           |           |
|------------------|------------------|----------------|-------------------------|-----------|-----------|
|                  |                  |                | X                       | Y         | Z         |
| 1                | 6                | 0              | -3.123377               | 1.226142  | -0.741259 |
| 2                | 6                | 0              | -4.226615               | 0.389558  | -0.750717 |
| 3                | 6                | 0              | -4.204433               | -0.744478 | 0.051584  |
| 4                | 6                | 0              | -3.122237               | -1.056484 | 0.864853  |
| 5                | 6                | 0              | -2.031734               | -0.202756 | 0.869652  |
| 6                | 6                | 0              | -2.007142               | 0.948211  | 0.064652  |
| 7                | 1                | 0              | -3.119504               | 2.097604  | -1.385996 |
| 8                | 1                | 0              | -5.081431               | 0.604114  | -1.378417 |
| 9                | 1                | 0              | -3.140117               | -1.938834 | 1.490809  |
| 10               | 1                | 0              | -1.200492               | -0.421118 | 1.530845  |
| 11               | 6                | 0              | -0.855107               | 1.867314  | 0.067699  |
| 12               | 6                | 0              | 0.461482                | 1.468264  | 0.044194  |
| 13               | 6                | 0              | -1.102331               | 3.295495  | 0.079473  |
| 14               | 1                | 0              | 1.216471                | 2.248427  | 0.070523  |
| 15               | 1                | 0              | -2.163155               | 3.586270  | 0.166978  |
| 16               | 8                | 0              | -0.246389               | 4.173342  | 0.021411  |
| 17               | 7                | 0              | 0.922168                | 0.220119  | -0.050133 |
| 18               | 1                | 0              | 0.258601                | -0.533803 | -0.197595 |
| 19               | 6                | 0              | 2.284341                | -0.159911 | -0.065632 |
| 20               | 6                | 0              | 2.617991                | -1.387893 | -0.644965 |
| 21               | 6                | 0              | 3.285766                | 0.631680  | 0.484374  |
| 22               | 6                | 0              | 3.935915                | -1.802642 | -0.690872 |
| 23               | 1                | 0              | 1.836840                | -2.011599 | -1.067215 |
| 24               | 6                | 0              | 4.617843                | 0.224485  | 0.424378  |
| 25               | 1                | 0              | 3.049315                | 1.564904  | 0.981555  |
| 26               | 6                | 0              | 4.947578                | -0.993400 | -0.165938 |
| 27               | 1                | 0              | 4.201928                | -2.751517 | -1.142499 |
| 28               | 1                | 0              | 5.376598                | 0.862821  | 0.857230  |
| 29               | 8                | 0              | 6.215238                | -1.477868 | -0.266774 |
| 30               | 6                | 0              | 7.275177                | -0.652843 | 0.201605  |
| 31               | 1                | 0              | 7.186779                | -0.471541 | 1.276297  |
| 32               | 1                | 0              | 8.192745                | -1.202928 | 0.001575  |
| 33               | 1                | 0              | 7.295212                | 0.298639  | -0.337004 |
| 34               | 7                | 0              | -5.361472               | -1.638527 | 0.041635  |
| 35               | 8                | 0              | -5.323684               | -2.641927 | 0.729245  |
| 36               | 8                | 0              | -6.314336               | -1.341925 | -0.654643 |

## Structure 29c (vacuum)

Energy (Hartrees): -1028.27652650

No imaginary frequencies

Standard orientation:

| Center<br>Number | Atomic<br>Number | Atomic<br>Type | Coordinates (Angstroms) |           |           |
|------------------|------------------|----------------|-------------------------|-----------|-----------|
|                  |                  |                | X                       | Y         | Z         |
| 1                | 6                | 0              | 3.029481                | 1.136938  | -0.787588 |
| 2                | 6                | 0              | 4.088510                | 0.242775  | -0.802652 |
| 3                | 6                | 0              | 4.058469                | -0.839176 | 0.064915  |
| 4                | 6                | 0              | 3.015904                | -1.047839 | 0.954121  |
| 5                | 6                | 0              | 1.963117                | -0.144427 | 0.957493  |
| 6                | 6                | 0              | 1.946674                | 0.949493  | 0.080829  |
| 7                | 1                | 0              | 3.039907                | 1.994381  | -1.446766 |
| 8                | 1                | 0              | 4.928587                | 0.370298  | -1.471706 |
| 9                | 1                | 0              | 3.046413                | -1.892624 | 1.628880  |
| 10               | 1                | 0              | 1.157308                | -0.269724 | 1.672630  |
| 11               | 6                | 0              | 0.817111                | 1.900410  | 0.077315  |
| 12               | 6                | 0              | -0.489222               | 1.517628  | 0.049105  |
| 13               | 6                | 0              | 1.059062                | 3.342863  | 0.035945  |
| 14               | 1                | 0              | -1.254419               | 2.289231  | 0.048901  |
| 15               | 7                | 0              | -0.962745               | 0.255299  | -0.032074 |
| 16               | 1                | 0              | -0.292129               | -0.485753 | -0.189215 |
| 17               | 6                | 0              | -2.328324               | -0.100451 | -0.069220 |
| 18               | 6                | 0              | -2.709696               | -1.258049 | -0.755400 |
| 19               | 6                | 0              | -3.300530               | 0.659231  | 0.568160  |
| 20               | 6                | 0              | -4.037059               | -1.633301 | -0.811543 |
| 21               | 1                | 0              | -1.957607               | -1.856998 | -1.257504 |
| 22               | 6                | 0              | -4.645090               | 0.297650  | 0.493992  |
| 23               | 1                | 0              | -3.022229               | 1.529447  | 1.150357  |
| 24               | 6                | 0              | -5.019586               | -0.851909 | -0.196127 |
| 25               | 1                | 0              | -4.343887               | -2.526165 | -1.341793 |
| 26               | 1                | 0              | -5.378284               | 0.912567  | 0.997281  |
| 27               | 8                | 0              | 2.141870                | 3.875298  | -0.030599 |
| 28               | 1                | 0              | 0.135123                | 3.956731  | 0.072351  |
| 29               | 8                | 0              | -6.295098               | -1.295940 | -0.320809 |
| 30               | 6                | 0              | -7.319579               | -0.531463 | 0.280971  |
| 31               | 1                | 0              | -8.250540               | -1.047295 | 0.058379  |
| 32               | 1                | 0              | -7.185374               | -0.475812 | 1.365840  |
| 33               | 1                | 0              | -7.354862               | 0.479682  | -0.136879 |
| 34               | 7                | 0              | 5.179319                | -1.799307 | 0.049926  |
| 35               | 8                | 0              | 5.121529                | -2.740927 | 0.812092  |
| 36               | 8                | 0              | 6.086764                | -1.589949 | -0.725389 |

## Structure 29c (CHCl<sub>3</sub>)

Energy (Hartrees): -1028.30637666

No imaginary frequencies

Standard orientation:

| Center<br>Number | Atomic<br>Number | Atomic<br>Type | Coordinates (Angstroms) |           |           |
|------------------|------------------|----------------|-------------------------|-----------|-----------|
|                  |                  |                | X                       | Y         | Z         |
| 1                | 6                | 0              | 3.053177                | 1.047367  | -0.854565 |
| 2                | 6                | 0              | 4.076127                | 0.113150  | -0.853871 |
| 3                | 6                | 0              | 4.010049                | -0.941724 | 0.046646  |
| 4                | 6                | 0              | 2.967425                | -1.082533 | 0.951313  |
| 5                | 6                | 0              | 1.954660                | -0.135676 | 0.941105  |
| 6                | 6                | 0              | 1.975298                | 0.934932  | 0.035043  |
| 7                | 1                | 0              | 3.085586                | 1.874004  | -1.552268 |
| 8                | 1                | 0              | 4.906918                | 0.190948  | -1.542448 |
| 9                | 1                | 0              | 2.960278                | -1.907022 | 1.651859  |
| 10               | 1                | 0              | 1.150491                | -0.213959 | 1.664815  |
| 11               | 6                | 0              | 0.891859                | 1.937860  | 0.018588  |
| 12               | 6                | 0              | -0.440506               | 1.622981  | 0.039348  |
| 13               | 6                | 0              | 1.193339                | 3.357401  | -0.052108 |
| 14               | 1                | 0              | -1.157354               | 2.439565  | 0.042519  |
| 15               | 7                | 0              | -0.981779               | 0.395342  | 0.011866  |
| 16               | 1                | 0              | -0.368827               | -0.397114 | -0.142975 |
| 17               | 6                | 0              | -2.368456               | 0.119586  | 0.041682  |
| 18               | 6                | 0              | -2.848719               | -1.013407 | -0.605096 |
| 19               | 6                | 0              | -3.262760               | 0.950677  | 0.722298  |
| 20               | 6                | 0              | -4.207783               | -1.317461 | -0.596200 |
| 21               | 1                | 0              | -2.157672               | -1.663427 | -1.131267 |
| 22               | 6                | 0              | -4.616278               | 0.663284  | 0.716845  |
| 23               | 1                | 0              | -2.904675               | 1.812156  | 1.274125  |
| 24               | 6                | 0              | -5.100890               | -0.469941 | 0.058098  |
| 25               | 1                | 0              | -4.549178               | -2.205722 | -1.110771 |
| 26               | 1                | 0              | -5.318695               | 1.301314  | 1.240008  |
| 27               | 8                | 0              | 2.305138                | 3.850554  | -0.106383 |
| 28               | 1                | 0              | 0.300216                | 4.011824  | -0.045343 |
| 29               | 8                | 0              | -6.442216               | -0.664969 | 0.117351  |
| 30               | 6                | 0              | -6.971005               | -1.817058 | -0.519368 |
| 31               | 1                | 0              | -8.045430               | -1.788076 | -0.349108 |
| 32               | 1                | 0              | -6.773568               | -1.799233 | -1.595338 |
| 33               | 1                | 0              | -6.560263               | -2.732080 | -0.082289 |
| 34               | 7                | 0              | 5.083451                | -1.945183 | 0.043882  |
| 35               | 8                | 0              | 4.960726                | -2.914049 | 0.766970  |
| 36               | 8                | 0              | 6.037259                | -1.757898 | -0.684225 |

## Structure 29c (DMSO)

Energy (Hartrees): -1028.30767651

No imaginary frequencies

Standard orientation:

| Center<br>Number | Atomic<br>Number | Atomic<br>Type | Coordinates (Angstroms) |           |           |
|------------------|------------------|----------------|-------------------------|-----------|-----------|
|                  |                  |                | X                       | Y         | Z         |
| 1                | 6                | 0              | 3.009057                | 1.118420  | -0.823478 |
| 2                | 6                | 0              | 4.074397                | 0.233883  | -0.850060 |
| 3                | 6                | 0              | 4.073115                | -0.831801 | 0.041365  |
| 4                | 6                | 0              | 3.049984                | -1.032556 | 0.957148  |
| 5                | 6                | 0              | 1.992150                | -0.135651 | 0.971421  |
| 6                | 6                | 0              | 1.949080                | 0.944034  | 0.077953  |
| 7                | 1                | 0              | 2.990823                | 1.950326  | -1.515647 |
| 8                | 1                | 0              | 4.887126                | 0.361491  | -1.552567 |
| 9                | 1                | 0              | 3.086694                | -1.864189 | 1.648271  |
| 10               | 1                | 0              | 1.200089                | -0.266396 | 1.700712  |
| 11               | 6                | 0              | 0.819855                | 1.894665  | 0.077530  |
| 12               | 6                | 0              | -0.499459               | 1.520475  | 0.069539  |
| 13               | 6                | 0              | 1.058150                | 3.325287  | 0.047506  |
| 14               | 1                | 0              | -1.248662               | 2.307103  | 0.066172  |
| 15               | 7                | 0              | -0.980344               | 0.271237  | 0.022214  |
| 16               | 1                | 0              | -0.324684               | -0.495027 | -0.089629 |
| 17               | 6                | 0              | -2.346177               | -0.086638 | -0.018743 |
| 18               | 6                | 0              | -2.684642               | -1.336321 | -0.548689 |
| 19               | 6                | 0              | -3.353822               | 0.746192  | 0.454805  |
| 20               | 6                | 0              | -4.007485               | -1.730930 | -0.621564 |
| 21               | 1                | 0              | -1.901045               | -1.993813 | -0.910916 |
| 22               | 6                | 0              | -4.690879               | 0.358447  | 0.366804  |
| 23               | 1                | 0              | -3.120296               | 1.700090  | 0.912359  |
| 24               | 6                | 0              | -5.025013               | -0.881201 | -0.175192 |
| 25               | 1                | 0              | -4.273149               | -2.697675 | -1.033358 |
| 26               | 1                | 0              | -5.451533               | 1.031096  | 0.740610  |
| 27               | 8                | 0              | 2.148593                | 3.871570  | 0.035527  |
| 28               | 1                | 0              | 0.136606                | 3.937449  | 0.049870  |
| 29               | 8                | 0              | -6.292667               | -1.347359 | -0.300665 |
| 30               | 6                | 0              | -7.347557               | -0.502141 | 0.135439  |
| 31               | 1                | 0              | -8.269596               | -1.047472 | -0.056707 |
| 32               | 1                | 0              | -7.268313               | -0.291090 | 1.205750  |
| 33               | 1                | 0              | -7.358480               | 0.436677  | -0.425959 |
| 34               | 7                | 0              | 5.195548                | -1.777628 | 0.017713  |
| 35               | 8                | 0              | 5.162869                | -2.725189 | 0.779067  |
| 36               | 8                | 0              | 6.104139                | -1.567625 | -0.762574 |

## Structure 29c (C<sub>2</sub>H<sub>5</sub>OH)

Energy (Hartrees): -1028.30929611

No imaginary frequencies

Standard orientation:

| Center<br>Number | Atomic<br>Number | Atomic<br>Type | Coordinates (Angstroms) |           |           |
|------------------|------------------|----------------|-------------------------|-----------|-----------|
|                  |                  |                | X                       | Y         | Z         |
| 1                | 6                | 0              | 2.985272                | 1.089807  | -0.860765 |
| 2                | 6                | 0              | 4.049674                | 0.204242  | -0.881867 |
| 3                | 6                | 0              | 4.064409                | -0.831927 | 0.043345  |
| 4                | 6                | 0              | 3.061589                | -1.003861 | 0.987467  |
| 5                | 6                | 0              | 2.007412                | -0.102947 | 0.998182  |
| 6                | 6                | 0              | 1.948204                | 0.947676  | 0.072053  |
| 7                | 1                | 0              | 2.948251                | 1.894356  | -1.584983 |
| 8                | 1                | 0              | 4.845898                | 0.306018  | -1.607436 |
| 9                | 1                | 0              | 3.112814                | -1.812452 | 1.704790  |
| 10               | 1                | 0              | 1.230714                | -0.207476 | 1.748194  |
| 11               | 6                | 0              | 0.821118                | 1.902946  | 0.069218  |
| 12               | 6                | 0              | -0.500671               | 1.528114  | 0.061367  |
| 13               | 6                | 0              | 1.058850                | 3.324887  | 0.042469  |
| 14               | 1                | 0              | -1.251257               | 2.313259  | 0.053921  |
| 15               | 7                | 0              | -0.974961               | 0.279503  | 0.019951  |
| 16               | 1                | 0              | -0.314644               | -0.484819 | -0.080548 |
| 17               | 6                | 0              | -2.340822               | -0.084727 | -0.016872 |
| 18               | 6                | 0              | -2.675666               | -1.333128 | -0.550249 |
| 19               | 6                | 0              | -3.347534               | 0.743963  | 0.464908  |
| 20               | 6                | 0              | -3.997985               | -1.730113 | -0.621727 |
| 21               | 1                | 0              | -1.891545               | -1.987416 | -0.917055 |
| 22               | 6                | 0              | -4.683755               | 0.354545  | 0.378008  |
| 23               | 1                | 0              | -3.113430               | 1.695257  | 0.927767  |
| 24               | 6                | 0              | -5.013660               | -0.882513 | -0.170141 |
| 25               | 1                | 0              | -4.264329               | -2.695489 | -1.036782 |
| 26               | 1                | 0              | -5.445778               | 1.022922  | 0.756611  |
| 27               | 8                | 0              | 2.158050                | 3.870267  | 0.041473  |
| 28               | 1                | 0              | 0.145099                | 3.944990  | 0.037040  |
| 29               | 8                | 0              | -6.285219               | -1.350871 | -0.298307 |
| 30               | 6                | 0              | -7.346104               | -0.505186 | 0.128592  |
| 31               | 1                | 0              | -8.264706               | -1.052074 | -0.075537 |
| 32               | 1                | 0              | -7.276190               | -0.298283 | 1.200039  |
| 33               | 1                | 0              | -7.348219               | 0.433053  | -0.433149 |
| 34               | 7                | 0              | 5.180760                | -1.779864 | 0.022206  |
| 35               | 8                | 0              | 5.124968                | -2.754657 | 0.747538  |
| 36               | 8                | 0              | 6.115294                | -1.552238 | -0.722191 |

## Structure 29d (vacuum)

Energy (Hartrees): -1028.26811538

No imaginary frequencies

Standard orientation:

| Center<br>Number | Atomic<br>Number | Atomic<br>Type | Coordinates (Angstroms) |           |           |
|------------------|------------------|----------------|-------------------------|-----------|-----------|
|                  |                  |                | X                       | Y         | Z         |
| 1                | 6                | 0              | -3.178647               | 1.195662  | 0.599784  |
| 2                | 6                | 0              | -4.342179               | 0.453036  | 0.725106  |
| 3                | 6                | 0              | -4.408781               | -0.792326 | 0.118352  |
| 4                | 6                | 0              | -3.356447               | -1.310531 | -0.619923 |
| 5                | 6                | 0              | -2.202691               | -0.552708 | -0.742245 |
| 6                | 6                | 0              | -2.085144               | 0.699202  | -0.122808 |
| 7                | 1                | 0              | -3.113665               | 2.169771  | 1.063802  |
| 8                | 1                | 0              | -5.190520               | 0.820313  | 1.286538  |
| 9                | 1                | 0              | -3.458747               | -2.276664 | -1.095308 |
| 10               | 1                | 0              | -1.389165               | -0.927675 | -1.352702 |
| 11               | 6                | 0              | -0.828967               | 1.474799  | -0.225741 |
| 12               | 6                | 0              | 0.366138                | 0.819327  | -0.131248 |
| 13               | 6                | 0              | -0.875261               | 2.922341  | -0.424406 |
| 14               | 1                | 0              | 0.351536                | -0.255911 | 0.021078  |
| 15               | 7                | 0              | 1.617056                | 1.336513  | -0.153350 |
| 16               | 1                | 0              | 1.737059                | 2.337419  | -0.147577 |
| 17               | 6                | 0              | 2.801547                | 0.565513  | -0.109578 |
| 18               | 6                | 0              | 3.930424                | 1.083093  | 0.512829  |
| 19               | 6                | 0              | 2.867708                | -0.700520 | -0.697817 |
| 20               | 6                | 0              | 5.115835                | 0.354785  | 0.563054  |
| 21               | 1                | 0              | 3.885694                | 2.062346  | 0.977101  |
| 22               | 6                | 0              | 4.034582                | -1.438904 | -0.628626 |
| 23               | 1                | 0              | 2.013973                | -1.100164 | -1.231938 |
| 24               | 6                | 0              | 5.168544                | -0.918845 | 0.000225  |
| 25               | 1                | 0              | 5.976670                | 0.788161  | 1.053101  |
| 26               | 1                | 0              | 4.101682                | -2.421378 | -1.079089 |
| 27               | 1                | 0              | 0.105794                | 3.414544  | -0.585510 |
| 28               | 8                | 0              | -1.874651               | 3.602854  | -0.448960 |
| 29               | 8                | 0              | 6.264450                | -1.716889 | 0.002308  |
| 30               | 6                | 0              | 7.429954                | -1.233217 | 0.638383  |
| 31               | 1                | 0              | 7.248045                | -1.041396 | 1.700458  |
| 32               | 1                | 0              | 8.177083                | -2.016285 | 0.534169  |
| 33               | 1                | 0              | 7.792319                | -0.319278 | 0.157179  |
| 34               | 7                | 0              | -5.642588               | -1.588297 | 0.251677  |
| 35               | 8                | 0              | -5.675918               | -2.669528 | -0.297553 |
| 36               | 8                | 0              | -6.548721               | -1.115881 | 0.904000  |



## Structure 29d (CHCl<sub>3</sub>)

Energy (Hartrees): -1028.29934584

No imaginary frequencies

Standard orientation:

| Center<br>Number | Atomic<br>Number | Atomic<br>Type | Coordinates (Angstroms) |           |           |
|------------------|------------------|----------------|-------------------------|-----------|-----------|
|                  |                  |                | X                       | Y         | Z         |
| 1                | 6                | 0              | -3.164155               | 1.181253  | 0.633703  |
| 2                | 6                | 0              | -4.333208               | 0.449453  | 0.760614  |
| 3                | 6                | 0              | -4.425481               | -0.777635 | 0.116700  |
| 4                | 6                | 0              | -3.389706               | -1.285847 | -0.654774 |
| 5                | 6                | 0              | -2.230434               | -0.537550 | -0.777296 |
| 6                | 6                | 0              | -2.088674               | 0.698247  | -0.127779 |
| 7                | 1                | 0              | -3.078384               | 2.133461  | 1.138850  |
| 8                | 1                | 0              | -5.159470               | 0.815143  | 1.355605  |
| 9                | 1                | 0              | -3.500238               | -2.237132 | -1.158102 |
| 10               | 1                | 0              | -1.429055               | -0.908529 | -1.405842 |
| 11               | 6                | 0              | -0.829062               | 1.465657  | -0.229436 |
| 12               | 6                | 0              | 0.365219                | 0.786067  | -0.179812 |
| 13               | 6                | 0              | -0.862650               | 2.909055  | -0.391658 |
| 14               | 1                | 0              | 0.332404                | -0.294209 | -0.073338 |
| 15               | 7                | 0              | 1.610762                | 1.289197  | -0.198791 |
| 16               | 1                | 0              | 1.742771                | 2.291393  | -0.162434 |
| 17               | 6                | 0              | 2.797645                | 0.521983  | -0.135538 |
| 18               | 6                | 0              | 3.936028                | 1.098406  | 0.416453  |
| 19               | 6                | 0              | 2.862475                | -0.784131 | -0.628263 |
| 20               | 6                | 0              | 5.130210                | 0.387902  | 0.496414  |
| 21               | 1                | 0              | 3.891211                | 2.113356  | 0.797225  |
| 22               | 6                | 0              | 4.042321                | -1.501460 | -0.532962 |
| 23               | 1                | 0              | 2.002196                | -1.238718 | -1.104734 |
| 24               | 6                | 0              | 5.184695                | -0.924579 | 0.029129  |
| 25               | 1                | 0              | 5.996359                | 0.865851  | 0.933766  |
| 26               | 1                | 0              | 4.104099                | -2.514911 | -0.911600 |
| 27               | 1                | 0              | 0.116788                | 3.401516  | -0.533036 |
| 28               | 8                | 0              | -1.865650               | 3.599782  | -0.416667 |
| 29               | 8                | 0              | 6.291865                | -1.707753 | 0.067942  |
| 30               | 6                | 0              | 7.474702                | -1.150800 | 0.619010  |
| 31               | 1                | 0              | 7.330294                | -0.881056 | 1.669487  |
| 32               | 1                | 0              | 8.234245                | -1.927029 | 0.547874  |
| 33               | 1                | 0              | 7.798832                | -0.273041 | 0.051909  |
| 34               | 7                | 0              | -5.660174               | -1.558335 | 0.248546  |
| 35               | 8                | 0              | -5.710327               | -2.645942 | -0.292436 |
| 36               | 8                | 0              | -6.572852               | -1.080870 | 0.893542  |

## Structure 29d (DMSO)

Energy (Hartrees): -1028.30108677

No imaginary frequencies

Standard orientation:

| Center<br>Number | Atomic<br>Number | Atomic<br>Type | Coordinates (Angstroms) |           |           |
|------------------|------------------|----------------|-------------------------|-----------|-----------|
|                  |                  |                | X                       | Y         | Z         |
| 1                | 6                | 0              | -3.166893               | 1.183133  | 0.631481  |
| 2                | 6                | 0              | -4.337753               | 0.453709  | 0.753040  |
| 3                | 6                | 0              | -4.426877               | -0.777300 | 0.114975  |
| 4                | 6                | 0              | -3.382577               | -1.291905 | -0.641966 |
| 5                | 6                | 0              | -2.221443               | -0.545824 | -0.759727 |
| 6                | 6                | 0              | -2.084515               | 0.696337  | -0.119229 |
| 7                | 1                | 0              | -3.084120               | 2.135303  | 1.137124  |
| 8                | 1                | 0              | -5.165909               | 0.825475  | 1.341592  |
| 9                | 1                | 0              | -3.483949               | -2.247054 | -1.140131 |
| 10               | 1                | 0              | -1.414529               | -0.926837 | -1.375106 |
| 11               | 6                | 0              | -0.828357               | 1.466962  | -0.219054 |
| 12               | 6                | 0              | 0.367802                | 0.784982  | -0.168766 |
| 13               | 6                | 0              | -0.862660               | 2.907788  | -0.389598 |
| 14               | 1                | 0              | 0.332390                | -0.295838 | -0.068969 |
| 15               | 7                | 0              | 1.610048                | 1.286864  | -0.182859 |
| 16               | 1                | 0              | 1.746849                | 2.289701  | -0.143614 |
| 17               | 6                | 0              | 2.796032                | 0.518206  | -0.128444 |
| 18               | 6                | 0              | 3.942139                | 1.102537  | 0.400196  |
| 19               | 6                | 0              | 2.854066                | -0.794427 | -0.605404 |
| 20               | 6                | 0              | 5.137132                | 0.392511  | 0.476285  |
| 21               | 1                | 0              | 3.902148                | 2.124085  | 0.763677  |
| 22               | 6                | 0              | 4.036405                | -1.509780 | -0.515788 |
| 23               | 1                | 0              | 1.988260                | -1.257816 | -1.063487 |
| 24               | 6                | 0              | 5.186300                | -0.926611 | 0.025083  |
| 25               | 1                | 0              | 6.008495                | 0.877845  | 0.895209  |
| 26               | 1                | 0              | 4.089300                | -2.527884 | -0.883722 |
| 27               | 1                | 0              | 0.116903                | 3.400320  | -0.519883 |
| 28               | 8                | 0              | -1.868265               | 3.597994  | -0.435399 |
| 29               | 8                | 0              | 6.294609                | -1.707412 | 0.060806  |
| 30               | 6                | 0              | 7.476610                | -1.140964 | 0.608751  |
| 31               | 1                | 0              | 7.329841                | -0.862497 | 1.656427  |
| 32               | 1                | 0              | 8.240034                | -1.914014 | 0.544569  |
| 33               | 1                | 0              | 7.797598                | -0.265891 | 0.036530  |
| 34               | 7                | 0              | -5.662838               | -1.553644 | 0.240461  |
| 35               | 8                | 0              | -5.714044               | -2.643614 | -0.298005 |
| 36               | 8                | 0              | -6.580580               | -1.072412 | 0.878291  |

## Structure 29d (C<sub>2</sub>H<sub>5</sub>OH)

Energy (Hartrees): -1028.30242553

No imaginary frequencies

Standard orientation:

| Center<br>Number | Atomic<br>Number | Atomic<br>Type | Coordinates (Angstroms) |           |           |
|------------------|------------------|----------------|-------------------------|-----------|-----------|
|                  |                  |                | X                       | Y         | Z         |
| 1                | 6                | 0              | -3.168698               | 1.182473  | 0.639166  |
| 2                | 6                | 0              | -4.337869               | 0.450508  | 0.757516  |
| 3                | 6                | 0              | -4.421394               | -0.778844 | 0.114847  |
| 4                | 6                | 0              | -3.375738               | -1.289941 | -0.643225 |
| 5                | 6                | 0              | -2.217290               | -0.540198 | -0.757798 |
| 6                | 6                | 0              | -2.085457               | 0.699961  | -0.112895 |
| 7                | 1                | 0              | -3.086965               | 2.130672  | 1.153353  |
| 8                | 1                | 0              | -5.166532               | 0.818095  | 1.348331  |
| 9                | 1                | 0              | -3.474403               | -2.243645 | -1.144975 |
| 10               | 1                | 0              | -1.408530               | -0.915591 | -1.374287 |
| 11               | 6                | 0              | -0.830358               | 1.473284  | -0.211133 |
| 12               | 6                | 0              | 0.369400                | 0.792577  | -0.152166 |
| 13               | 6                | 0              | -0.866259               | 2.904435  | -0.396232 |
| 14               | 1                | 0              | 0.334106                | -0.287617 | -0.044829 |
| 15               | 7                | 0              | 1.608317                | 1.294569  | -0.166699 |
| 16               | 1                | 0              | 1.745843                | 2.297980  | -0.138939 |
| 17               | 6                | 0              | 2.795223                | 0.524090  | -0.117789 |
| 18               | 6                | 0              | 3.938565                | 1.099849  | 0.424975  |
| 19               | 6                | 0              | 2.852084                | -0.779414 | -0.617511 |
| 20               | 6                | 0              | 5.132479                | 0.387566  | 0.493288  |
| 21               | 1                | 0              | 3.897808                | 2.115131  | 0.805435  |
| 22               | 6                | 0              | 4.033170                | -1.497599 | -0.535879 |
| 23               | 1                | 0              | 1.986937                | -1.231727 | -1.087883 |
| 24               | 6                | 0              | 5.179268                | -0.922626 | 0.019457  |
| 25               | 1                | 0              | 6.003474                | 0.863644  | 0.923379  |
| 26               | 1                | 0              | 4.089123                | -2.509462 | -0.920777 |
| 27               | 1                | 0              | 0.107872                | 3.406959  | -0.514169 |
| 28               | 8                | 0              | -1.880608               | 3.590435  | -0.468676 |
| 29               | 8                | 0              | 6.290513                | -1.707698 | 0.045405  |
| 30               | 6                | 0              | 7.476026                | -1.153244 | 0.602927  |
| 31               | 1                | 0              | 7.327274                | -0.892178 | 1.654382  |
| 32               | 1                | 0              | 8.234871                | -1.929666 | 0.525913  |
| 33               | 1                | 0              | 7.797606                | -0.271472 | 0.041973  |
| 34               | 7                | 0              | -5.650722               | -1.558415 | 0.238586  |
| 35               | 8                | 0              | -5.700023               | -2.651776 | -0.294735 |
| 36               | 8                | 0              | -6.576201               | -1.083643 | 0.871081  |

## Structure 29g (vacuum)

Energy (Hartrees): -1028.27343382

No imaginary frequencies

Standard orientation:

| Center<br>Number | Atomic<br>Number | Atomic<br>Type | Coordinates (Angstroms) |           |           |
|------------------|------------------|----------------|-------------------------|-----------|-----------|
|                  |                  |                | X                       | Y         | Z         |
| 1                | 6                | 0              | -2.316087               | -0.513769 | -0.747689 |
| 2                | 6                | 0              | -3.527494               | -1.186569 | -0.757524 |
| 3                | 6                | 0              | -4.589937               | -0.648847 | -0.047063 |
| 4                | 6                | 0              | -4.472950               | 0.528917  | 0.675537  |
| 5                | 6                | 0              | -3.249808               | 1.180383  | 0.688310  |
| 6                | 6                | 0              | -2.155284               | 0.680277  | -0.030460 |
| 7                | 1                | 0              | -1.491076               | -0.905881 | -1.330900 |
| 8                | 1                | 0              | -3.664487               | -2.104614 | -1.312823 |
| 9                | 1                | 0              | -5.323657               | 0.904705  | 1.227955  |
| 10               | 1                | 0              | -3.134080               | 2.076760  | 1.285929  |
| 11               | 6                | 0              | -0.861431               | 1.389252  | -0.040227 |
| 12               | 6                | 0              | -0.816294               | 2.751787  | -0.105340 |
| 13               | 6                | 0              | 0.377873                | 0.635957  | -0.004875 |
| 14               | 1                | 0              | -1.725471               | 3.345179  | -0.154328 |
| 15               | 1                | 0              | 0.306161                | -0.452748 | 0.087875  |
| 16               | 8                | 0              | 0.285353                | 3.464616  | -0.141743 |
| 17               | 1                | 0              | 1.052890                | 2.816578  | -0.122132 |
| 18               | 7                | 0              | 1.523518                | 1.216566  | -0.063452 |
| 19               | 6                | 0              | 2.710238                | 0.462074  | 0.057658  |
| 20               | 6                | 0              | 2.822437                | -0.644723 | 0.909263  |
| 21               | 6                | 0              | 3.824444                | 0.860927  | -0.673241 |
| 22               | 6                | 0              | 4.008954                | -1.348971 | 0.991872  |
| 23               | 1                | 0              | 1.986011                | -0.932027 | 1.536204  |
| 24               | 6                | 0              | 5.020104                | 0.152532  | -0.604368 |
| 25               | 1                | 0              | 3.744381                | 1.729903  | -1.315765 |
| 26               | 6                | 0              | 5.114119                | -0.961788 | 0.228715  |
| 27               | 1                | 0              | 4.113810                | -2.197180 | 1.656950  |
| 28               | 1                | 0              | 5.862909                | 0.481499  | -1.196819 |
| 29               | 8                | 0              | 6.230907                | -1.717489 | 0.377029  |
| 30               | 6                | 0              | 7.381535                | -1.340388 | -0.350737 |
| 31               | 1                | 0              | 8.153754                | -2.059648 | -0.087987 |
| 32               | 1                | 0              | 7.198019                | -1.381612 | -1.428940 |
| 33               | 1                | 0              | 7.711314                | -0.334152 | -0.073837 |
| 34               | 7                | 0              | -5.883857               | -1.354980 | -0.056005 |
| 35               | 8                | 0              | -6.796578               | -0.861608 | 0.571230  |
| 36               | 8                | 0              | -5.956009               | -2.385542 | -0.690789 |

## Structure 29g (CHCl<sub>3</sub>)

Energy (Hartrees): -1028.29826692

No imaginary frequencies

Standard orientation:

| Center<br>Number | Atomic<br>Number | Atomic<br>Type | Coordinates (Angstroms) |           |           |
|------------------|------------------|----------------|-------------------------|-----------|-----------|
|                  |                  |                | X                       | Y         | Z         |
| 1                | 6                | 0              | -2.308221               | -0.573481 | -0.664594 |
| 2                | 6                | 0              | -3.527325               | -1.231101 | -0.684125 |
| 3                | 6                | 0              | -4.610206               | -0.640680 | -0.046943 |
| 4                | 6                | 0              | -4.504131               | 0.575073  | 0.615473  |
| 5                | 6                | 0              | -3.274928               | 1.212348  | 0.637563  |
| 6                | 6                | 0              | -2.159851               | 0.659182  | -0.010508 |
| 7                | 1                | 0              | -1.468551               | -1.013454 | -1.189792 |
| 8                | 1                | 0              | -3.644769               | -2.177302 | -1.195392 |
| 9                | 1                | 0              | -5.364600               | 1.000782  | 1.114240  |
| 10               | 1                | 0              | -3.175227               | 2.143275  | 1.182958  |
| 11               | 6                | 0              | -0.861546               | 1.359141  | -0.020265 |
| 12               | 6                | 0              | -0.811324               | 2.721435  | -0.104009 |
| 13               | 6                | 0              | 0.375886                | 0.601898  | 0.022527  |
| 14               | 1                | 0              | -1.714491               | 3.323482  | -0.159181 |
| 15               | 1                | 0              | 0.308800                | -0.483940 | 0.135055  |
| 16               | 8                | 0              | 0.300565                | 3.422172  | -0.151514 |
| 17               | 1                | 0              | 1.063390                | 2.758518  | -0.130234 |
| 18               | 7                | 0              | 1.518680                | 1.188269  | -0.055225 |
| 19               | 6                | 0              | 2.715538                | 0.448933  | 0.064649  |
| 20               | 6                | 0              | 2.845884                | -0.651201 | 0.922228  |
| 21               | 6                | 0              | 3.819677                | 0.857512  | -0.678204 |
| 22               | 6                | 0              | 4.044106                | -1.338161 | 1.001436  |
| 23               | 1                | 0              | 2.014282                | -0.951076 | 1.550084  |
| 24               | 6                | 0              | 5.026298                | 0.166523  | -0.612786 |
| 25               | 1                | 0              | 3.725410                | 1.720795  | -1.327634 |
| 26               | 6                | 0              | 5.139778                | -0.940905 | 0.228153  |
| 27               | 1                | 0              | 4.159189                | -2.182051 | 1.671655  |
| 28               | 1                | 0              | 5.861508                | 0.502296  | -1.212826 |
| 29               | 8                | 0              | 6.268509                | -1.679343 | 0.371995  |
| 30               | 6                | 0              | 7.404295                | -1.304160 | -0.390606 |
| 31               | 1                | 0              | 8.188802                | -2.012164 | -0.130767 |
| 32               | 1                | 0              | 7.197848                | -1.369059 | -1.463015 |
| 33               | 1                | 0              | 7.731718                | -0.291484 | -0.137718 |
| 34               | 7                | 0              | -5.907225               | -1.325999 | -0.070015 |
| 35               | 8                | 0              | -6.837398               | -0.808510 | 0.516124  |
| 36               | 8                | 0              | -5.987560               | -2.376650 | -0.675442 |

## Structure 29g (DMSO)

Energy (Hartrees): -1028.29689417

No imaginary frequencies

Standard orientation:

| Center<br>Number | Atomic<br>Number | Atomic<br>Type | Coordinates (Angstroms) |           |           |
|------------------|------------------|----------------|-------------------------|-----------|-----------|
|                  |                  |                | X                       | Y         | Z         |
| 1                | 6                | 0              | -2.346018               | -0.585259 | -0.682385 |
| 2                | 6                | 0              | -3.577144               | -1.220462 | -0.686741 |
| 3                | 6                | 0              | -4.643226               | -0.609231 | -0.039799 |
| 4                | 6                | 0              | -4.509152               | 0.608669  | 0.614719  |
| 5                | 6                | 0              | -3.269326               | 1.224330  | 0.620704  |
| 6                | 6                | 0              | -2.170008               | 0.647408  | -0.034535 |
| 7                | 1                | 0              | -1.519658               | -1.046319 | -1.210684 |
| 8                | 1                | 0              | -3.712623               | -2.167612 | -1.191982 |
| 9                | 1                | 0              | -5.354179               | 1.055773  | 1.121071  |
| 10               | 1                | 0              | -3.149455               | 2.156844  | 1.159394  |
| 11               | 6                | 0              | -0.859792               | 1.323679  | -0.045444 |
| 12               | 6                | 0              | -0.788719               | 2.687632  | -0.106537 |
| 13               | 6                | 0              | 0.364831                | 0.547239  | -0.011183 |
| 14               | 1                | 0              | -1.682724               | 3.303601  | -0.159544 |
| 15               | 1                | 0              | 0.279960                | -0.540258 | 0.053749  |
| 16               | 8                | 0              | 0.335986                | 3.367650  | -0.133006 |
| 17               | 1                | 0              | 1.083018                | 2.679956  | -0.105737 |
| 18               | 7                | 0              | 1.514570                | 1.127863  | -0.043414 |
| 19               | 6                | 0              | 2.714245                | 0.391111  | 0.058047  |
| 20               | 6                | 0              | 2.824012                | -0.815709 | 0.762920  |
| 21               | 6                | 0              | 3.852658                | 0.921744  | -0.543877 |
| 22               | 6                | 0              | 4.036123                | -1.479919 | 0.826622  |
| 23               | 1                | 0              | 1.967098                | -1.226076 | 1.285311  |
| 24               | 6                | 0              | 5.075185                | 0.257674  | -0.490469 |
| 25               | 1                | 0              | 3.774575                | 1.865599  | -1.072665 |
| 26               | 6                | 0              | 5.169144                | -0.954306 | 0.194972  |
| 27               | 1                | 0              | 4.128891                | -2.409045 | 1.377319  |
| 28               | 1                | 0              | 5.935895                | 0.695731  | -0.978010 |
| 29               | 8                | 0              | 6.308338                | -1.678547 | 0.312199  |
| 30               | 6                | 0              | 7.483317                | -1.152025 | -0.289084 |
| 31               | 1                | 0              | 8.276799                | -1.866816 | -0.079871 |
| 32               | 1                | 0              | 7.360174                | -1.052182 | -1.371330 |
| 33               | 1                | 0              | 7.744614                | -0.181686 | 0.142769  |
| 34               | 7                | 0              | -5.949800               | -1.272954 | -0.042206 |
| 35               | 8                | 0              | -6.860693               | -0.747618 | 0.569389  |
| 36               | 8                | 0              | -6.061449               | -2.317399 | -0.655836 |

## Structure 29g (C<sub>2</sub>H<sub>5</sub>OH)

Energy (Hartrees): -1028.29694477

No imaginary frequencies

Standard orientation:

| Center<br>Number | Atomic<br>Number | Atomic<br>Type | Coordinates (Angstroms) |           |           |
|------------------|------------------|----------------|-------------------------|-----------|-----------|
|                  |                  |                | X                       | Y         | Z         |
| 1                | 6                | 0              | -2.309017               | -0.570847 | -0.677694 |
| 2                | 6                | 0              | -3.527108               | -1.229495 | -0.691849 |
| 3                | 6                | 0              | -4.606505               | -0.641125 | -0.045056 |
| 4                | 6                | 0              | -4.499053               | 0.574304  | 0.619625  |
| 5                | 6                | 0              | -3.271138               | 1.212777  | 0.634920  |
| 6                | 6                | 0              | -2.159785               | 0.660954  | -0.021454 |
| 7                | 1                | 0              | -1.471759               | -1.010783 | -1.206912 |
| 8                | 1                | 0              | -3.642351               | -2.174678 | -1.205768 |
| 9                | 1                | 0              | -5.354247               | 1.001476  | 1.126386  |
| 10               | 1                | 0              | -3.170357               | 2.143519  | 1.180607  |
| 11               | 6                | 0              | -0.862093               | 1.361308  | -0.031352 |
| 12               | 6                | 0              | -0.816933               | 2.723180  | -0.105119 |
| 13               | 6                | 0              | 0.374833                | 0.601995  | 0.009831  |
| 14               | 1                | 0              | -1.719239               | 3.326131  | -0.158806 |
| 15               | 1                | 0              | 0.304530                | -0.485055 | 0.102867  |
| 16               | 8                | 0              | 0.299086                | 3.426307  | -0.144007 |
| 17               | 1                | 0              | 1.063902                | 2.763695  | -0.120097 |
| 18               | 7                | 0              | 1.517948                | 1.191022  | -0.047404 |
| 19               | 6                | 0              | 2.713325                | 0.447721  | 0.068559  |
| 20               | 6                | 0              | 2.830581                | -0.678132 | 0.894082  |
| 21               | 6                | 0              | 3.829852                | 0.881299  | -0.641652 |
| 22               | 6                | 0              | 4.028435                | -1.367301 | 0.970402  |
| 23               | 1                | 0              | 1.989524                | -0.999518 | 1.498555  |
| 24               | 6                | 0              | 5.036499                | 0.189347  | -0.578466 |
| 25               | 1                | 0              | 3.748483                | 1.765830  | -1.264059 |
| 26               | 6                | 0              | 5.135053                | -0.944306 | 0.227800  |
| 27               | 1                | 0              | 4.130108                | -2.233851 | 1.614111  |
| 28               | 1                | 0              | 5.881503                | 0.544940  | -1.153199 |
| 29               | 8                | 0              | 6.265371                | -1.688943 | 0.364196  |
| 30               | 6                | 0              | 7.407740                | -1.299015 | -0.388071 |
| 31               | 1                | 0              | 8.185100                | -2.022289 | -0.149439 |
| 32               | 1                | 0              | 7.198034                | -1.328683 | -1.460757 |
| 33               | 1                | 0              | 7.741660                | -0.297722 | -0.102411 |
| 34               | 7                | 0              | -5.898467               | -1.323906 | -0.063569 |
| 35               | 8                | 0              | -6.838005               | -0.800023 | 0.505813  |
| 36               | 8                | 0              | -5.982623               | -2.387192 | -0.649915 |

### Structure 30a (vacuum)

Energy (Hartrees): -1124.90165526  
No imaginary frequencies

Standard orientation:

| Center<br>Number | Atomic<br>Number | Atomic<br>Type | Coordinates (Angstroms) |           |           |
|------------------|------------------|----------------|-------------------------|-----------|-----------|
|                  |                  |                | X                       | Y         | Z         |
| 1                | 6                | 0              | 2.536010                | 0.809990  | -0.792404 |
| 2                | 6                | 0              | 3.921146                | 0.791957  | -0.802575 |
| 3                | 6                | 0              | 4.579188                | -0.152849 | -0.029064 |
| 4                | 6                | 0              | 3.892832                | -1.067015 | 0.756574  |
| 5                | 6                | 0              | 2.508196                | -1.024126 | 0.768239  |
| 6                | 6                | 0              | 1.801393                | -0.096081 | -0.011725 |
| 7                | 1                | 0              | 2.014334                | 1.518727  | -1.424547 |
| 8                | 1                | 0              | 4.494569                | 1.481140  | -1.407746 |
| 9                | 1                | 0              | 4.445451                | -1.776159 | 1.358024  |
| 10               | 1                | 0              | 1.964853                | -1.699528 | 1.418620  |
| 11               | 6                | 0              | 0.326400                | -0.065813 | -0.017843 |
| 12               | 6                | 0              | -0.371222               | -1.248026 | 0.008258  |
| 13               | 6                | 0              | -0.341548               | 1.217762  | -0.043337 |
| 14               | 1                | 0              | 0.180940                | -2.180962 | 0.022861  |
| 15               | 1                | 0              | 0.305812                | 2.101316  | -0.002476 |
| 16               | 1                | 0              | -2.202327               | -0.452625 | 0.002384  |
| 17               | 7                | 0              | -1.619604               | 1.357599  | -0.085963 |
| 18               | 7                | 0              | -1.709890               | -1.350067 | 0.004466  |
| 19               | 7                | 0              | 6.051087                | -0.182976 | -0.037581 |
| 20               | 8                | 0              | 6.599678                | -1.039532 | 0.623445  |
| 21               | 8                | 0              | 6.626606                | 0.650073  | -0.705389 |
| 22               | 6                | 0              | -2.161260               | 2.655614  | 0.005943  |
| 23               | 6                | 0              | -3.262266               | 2.974351  | -0.793937 |
| 24               | 6                | 0              | -1.666012               | 3.611259  | 0.899350  |
| 25               | 6                | 0              | -3.829225               | 4.239608  | -0.731331 |
| 26               | 1                | 0              | -3.649173               | 2.221126  | -1.470362 |
| 27               | 6                | 0              | -2.244734               | 4.873503  | 0.963409  |
| 28               | 1                | 0              | -0.850909               | 3.350531  | 1.564811  |
| 29               | 6                | 0              | -3.322273               | 5.195861  | 0.145720  |
| 30               | 1                | 0              | -4.674269               | 4.480653  | -1.365622 |
| 31               | 1                | 0              | -1.857983               | 5.603409  | 1.665165  |
| 32               | 1                | 0              | -3.772822               | 6.179295  | 0.200968  |
| 33               | 6                | 0              | -2.461571               | -2.534763 | -0.015444 |
| 34               | 6                | 0              | -3.832381               | -2.434981 | 0.239234  |
| 35               | 6                | 0              | -1.904074               | -3.785435 | -0.289175 |
| 36               | 6                | 0              | -4.629922               | -3.569485 | 0.231046  |
| 37               | 1                | 0              | -4.262738               | -1.461971 | 0.450282  |
| 38               | 6                | 0              | -2.712214               | -4.916523 | -0.283645 |
| 39               | 1                | 0              | -0.853470               | -3.888739 | -0.527479 |
| 40               | 6                | 0              | -4.074582               | -4.819760 | -0.024509 |
| 41               | 1                | 0              | -5.690520               | -3.474842 | 0.431037  |
| 42               | 1                | 0              | -2.268052               | -5.881776 | -0.496233 |
| 43               | 1                | 0              | -4.696406               | -5.706103 | -0.027287 |



### Structure 30a (CHCl<sub>3</sub>)

Energy (Hartrees): -1124.93460596  
No imaginary frequencies

Standard orientation:

| Center<br>Number | Atomic<br>Number | Atomic<br>Type | Coordinates (Angstroms) |           |           |
|------------------|------------------|----------------|-------------------------|-----------|-----------|
|                  |                  |                | X                       | Y         | Z         |
| 1                | 6                | 0              | 2.541228                | 0.845238  | -0.759328 |
| 2                | 6                | 0              | 3.925666                | 0.828086  | -0.769000 |
| 3                | 6                | 0              | 4.584735                | -0.147406 | -0.032233 |
| 4                | 6                | 0              | 3.896472                | -1.094468 | 0.715324  |
| 5                | 6                | 0              | 2.512875                | -1.054641 | 0.724868  |
| 6                | 6                | 0              | 1.804858                | -0.094264 | -0.017622 |
| 7                | 1                | 0              | 2.024560                | 1.583465  | -1.361077 |
| 8                | 1                | 0              | 4.489843                | 1.546482  | -1.348686 |
| 9                | 1                | 0              | 4.438963                | -1.831439 | 1.292412  |
| 10               | 1                | 0              | 1.974082                | -1.762890 | 1.343131  |
| 11               | 6                | 0              | 0.330389                | -0.063462 | -0.022955 |
| 12               | 6                | 0              | -0.366432               | -1.250478 | 0.000833  |
| 13               | 6                | 0              | -0.334978               | 1.220333  | -0.043816 |
| 14               | 1                | 0              | 0.186823                | -2.182528 | 0.012893  |
| 15               | 1                | 0              | 0.311946                | 2.102405  | 0.009395  |
| 16               | 1                | 0              | -2.206634               | -0.464619 | -0.009774 |
| 17               | 7                | 0              | -1.614423               | 1.359902  | -0.095747 |
| 18               | 7                | 0              | -1.702722               | -1.355213 | -0.005241 |
| 19               | 7                | 0              | 6.049010                | -0.175898 | -0.039655 |
| 20               | 8                | 0              | 6.607899                | -1.053212 | 0.590084  |
| 21               | 8                | 0              | 6.635350                | 0.678582  | -0.675552 |
| 22               | 6                | 0              | -2.161107               | 2.654766  | 0.004367  |
| 23               | 6                | 0              | -3.281135               | 2.962246  | -0.775652 |
| 24               | 6                | 0              | -1.657775               | 3.618781  | 0.886264  |
| 25               | 6                | 0              | -3.860584               | 4.222542  | -0.704631 |
| 26               | 1                | 0              | -3.676428               | 2.204902  | -1.443664 |
| 27               | 6                | 0              | -2.248658               | 4.875795  | 0.958390  |
| 28               | 1                | 0              | -0.823936               | 3.370680  | 1.533685  |
| 29               | 6                | 0              | -3.346669               | 5.186194  | 0.161382  |
| 30               | 1                | 0              | -4.721012               | 4.453337  | -1.322824 |
| 31               | 1                | 0              | -1.854833               | 5.611350  | 1.651052  |
| 32               | 1                | 0              | -3.806632               | 6.165452  | 0.224104  |
| 33               | 6                | 0              | -2.455629               | -2.540897 | -0.017975 |
| 34               | 6                | 0              | -3.835740               | -2.425268 | 0.175660  |
| 35               | 6                | 0              | -1.892151               | -3.802743 | -0.223965 |
| 36               | 6                | 0              | -4.639285               | -3.556774 | 0.174924  |
| 37               | 1                | 0              | -4.267941               | -1.442040 | 0.330974  |
| 38               | 6                | 0              | -2.707933               | -4.929275 | -0.215282 |
| 39               | 1                | 0              | -0.831079               | -3.920406 | -0.403944 |
| 40               | 6                | 0              | -4.080378               | -4.818078 | -0.016096 |
| 41               | 1                | 0              | -5.707056               | -3.450370 | 0.328340  |
| 42               | 1                | 0              | -2.259746               | -5.903573 | -0.374291 |
| 43               | 1                | 0              | -4.706592               | -5.702068 | -0.014243 |

## Structure 30a (DMSO)

Energy (Hartrees): -1124.92889797

No imaginary frequencies

Standard orientation:

| Center<br>Number | Atomic<br>Number | Atomic<br>Type | Coordinates (Angstroms) |           |           |
|------------------|------------------|----------------|-------------------------|-----------|-----------|
|                  |                  |                | X                       | Y         | Z         |
| 1                | 6                | 0              | 2.540020                | 0.862401  | -0.734155 |
| 2                | 6                | 0              | 3.924261                | 0.845078  | -0.744695 |
| 3                | 6                | 0              | 4.584012                | -0.149803 | -0.033934 |
| 4                | 6                | 0              | 3.894363                | -1.116832 | 0.687675  |
| 5                | 6                | 0              | 2.511000                | -1.077268 | 0.698784  |
| 6                | 6                | 0              | 1.802886                | -0.095730 | -0.016644 |
| 7                | 1                | 0              | 2.025795                | 1.618196  | -1.315688 |
| 8                | 1                | 0              | 4.484033                | 1.580959  | -1.306549 |
| 9                | 1                | 0              | 4.432453                | -1.872498 | 1.244563  |
| 10               | 1                | 0              | 1.974386                | -1.805742 | 1.294969  |
| 11               | 6                | 0              | 0.328759                | -0.062652 | -0.020031 |
| 12               | 6                | 0              | -0.368075               | -1.251158 | 0.000801  |
| 13               | 6                | 0              | -0.333798               | 1.221945  | -0.038130 |
| 14               | 1                | 0              | 0.185881                | -2.182697 | 0.010881  |
| 15               | 1                | 0              | 0.313439                | 2.103142  | 0.017380  |
| 16               | 1                | 0              | -2.213760               | -0.469098 | -0.008710 |
| 17               | 7                | 0              | -1.614137               | 1.362682  | -0.092843 |
| 18               | 7                | 0              | -1.703905               | -1.356241 | -0.007046 |
| 19               | 7                | 0              | 6.046640                | -0.177809 | -0.042403 |
| 20               | 8                | 0              | 6.608288                | -1.066534 | 0.571054  |
| 21               | 8                | 0              | 6.634350                | 0.688877  | -0.662830 |
| 22               | 6                | 0              | -2.158002               | 2.658786  | 0.006063  |
| 23               | 6                | 0              | -3.289570               | 2.960594  | -0.760517 |
| 24               | 6                | 0              | -1.642969               | 3.630226  | 0.873930  |
| 25               | 6                | 0              | -3.868957               | 4.221548  | -0.690744 |
| 26               | 1                | 0              | -3.696343               | 2.198815  | -1.416841 |
| 27               | 6                | 0              | -2.233562               | 4.887770  | 0.944745  |
| 28               | 1                | 0              | -0.798364               | 3.389869  | 1.510378  |
| 29               | 6                | 0              | -3.343069               | 5.192217  | 0.160436  |
| 30               | 1                | 0              | -4.738082               | 4.446867  | -1.298931 |
| 31               | 1                | 0              | -1.830087               | 5.628771  | 1.626137  |
| 32               | 1                | 0              | -3.802379               | 6.172026  | 0.221971  |
| 33               | 6                | 0              | -2.456055               | -2.543005 | -0.019534 |
| 34               | 6                | 0              | -3.839506               | -2.424763 | 0.151520  |
| 35               | 6                | 0              | -1.889044               | -3.807477 | -0.201704 |
| 36               | 6                | 0              | -4.643078               | -3.556764 | 0.153384  |
| 37               | 1                | 0              | -4.274169               | -1.439441 | 0.286879  |
| 38               | 6                | 0              | -2.705606               | -4.933774 | -0.191470 |
| 39               | 1                | 0              | -0.825310               | -3.929247 | -0.362648 |
| 40               | 6                | 0              | -4.081236               | -4.820681 | -0.012878 |
| 41               | 1                | 0              | -5.713174               | -3.448236 | 0.289528  |
| 42               | 1                | 0              | -2.254800               | -5.909896 | -0.331858 |
| 43               | 1                | 0              | -4.707462               | -5.704908 | -0.008630 |

## Structure 30a (C<sub>2</sub>H<sub>5</sub>OH)

Energy (Hartrees): -1124.93066285

No imaginary frequencies

Standard orientation:

| Center<br>Number | Atomic<br>Number | Atomic<br>Type | Coordinates (Angstroms) |           |           |
|------------------|------------------|----------------|-------------------------|-----------|-----------|
|                  |                  |                | X                       | Y         | Z         |
| 1                | 6                | 0              | 2.537625                | 0.867925  | -0.727776 |
| 2                | 6                | 0              | 3.921165                | 0.851590  | -0.737621 |
| 3                | 6                | 0              | 4.580518                | -0.149036 | -0.033193 |
| 4                | 6                | 0              | 3.891075                | -1.121370 | 0.682784  |
| 5                | 6                | 0              | 2.508595                | -1.080293 | 0.695415  |
| 6                | 6                | 0              | 1.800133                | -0.094606 | -0.015232 |
| 7                | 1                | 0              | 2.023519                | 1.625184  | -1.307534 |
| 8                | 1                | 0              | 4.480783                | 1.589874  | -1.296734 |
| 9                | 1                | 0              | 4.428460                | -1.879486 | 1.237114  |
| 10               | 1                | 0              | 1.972431                | -1.809524 | 1.291023  |
| 11               | 6                | 0              | 0.327163                | -0.061711 | -0.018772 |
| 12               | 6                | 0              | -0.368727               | -1.251100 | 0.002937  |
| 13               | 6                | 0              | -0.336000               | 1.222844  | -0.038154 |
| 14               | 1                | 0              | 0.185701                | -2.182274 | 0.013586  |
| 15               | 1                | 0              | 0.310771                | 2.103898  | 0.024083  |
| 16               | 1                | 0              | -2.214800               | -0.471549 | -0.010232 |
| 17               | 7                | 0              | -1.615840               | 1.364162  | -0.100701 |
| 18               | 7                | 0              | -1.704014               | -1.357885 | -0.006326 |
| 19               | 7                | 0              | 6.037912                | -0.177433 | -0.042279 |
| 20               | 8                | 0              | 6.604018                | -1.102181 | 0.513307  |
| 21               | 8                | 0              | 6.632260                | 0.724511  | -0.605649 |
| 22               | 6                | 0              | -2.157871               | 2.661484  | 0.000411  |
| 23               | 6                | 0              | -3.279640               | 2.972093  | -0.776559 |
| 24               | 6                | 0              | -1.650473               | 3.624453  | 0.881769  |
| 25               | 6                | 0              | -3.856527               | 4.233994  | -0.703477 |
| 26               | 1                | 0              | -3.681234               | 2.216756  | -1.443564 |
| 27               | 6                | 0              | -2.238446               | 4.883074  | 0.955755  |
| 28               | 1                | 0              | -0.814416               | 3.376548  | 1.526683  |
| 29               | 6                | 0              | -3.337985               | 5.196655  | 0.161256  |
| 30               | 1                | 0              | -4.718402               | 4.466197  | -1.319542 |
| 31               | 1                | 0              | -1.840775               | 5.617649  | 1.647643  |
| 32               | 1                | 0              | -3.795708               | 6.177162  | 0.225423  |
| 33               | 6                | 0              | -2.454576               | -2.546450 | -0.018297 |
| 34               | 6                | 0              | -3.836829               | -2.431276 | 0.161568  |
| 35               | 6                | 0              | -1.886070               | -3.808681 | -0.208866 |
| 36               | 6                | 0              | -4.638260               | -3.564817 | 0.163703  |
| 37               | 1                | 0              | -4.272809               | -1.447381 | 0.303311  |
| 38               | 6                | 0              | -2.700194               | -4.936722 | -0.197851 |
| 39               | 1                | 0              | -0.823192               | -3.927565 | -0.377827 |
| 40               | 6                | 0              | -4.074924               | -4.826901 | -0.010699 |
| 41               | 1                | 0              | -5.707803               | -3.458989 | 0.306706  |
| 42               | 1                | 0              | -2.248266               | -5.911465 | -0.344714 |
| 43               | 1                | 0              | -4.699418               | -5.712468 | -0.006153 |

## Structure 30b (vacuum)

Energy (Hartrees): -1124.89269357

No imaginary frequencies

Standard orientation:

| Center<br>Number | Atomic<br>Number | Atomic<br>Type | Coordinates (Angstroms) |           |           |
|------------------|------------------|----------------|-------------------------|-----------|-----------|
|                  |                  |                | X                       | Y         | Z         |
| 1                | 6                | 0              | 0.902482                | -2.145609 | -0.838499 |
| 2                | 6                | 0              | 1.967805                | -3.033102 | -0.824079 |
| 3                | 6                | 0              | 3.041550                | -2.767041 | 0.012090  |
| 4                | 6                | 0              | 3.076091                | -1.653643 | 0.839236  |
| 5                | 6                | 0              | 2.000283                | -0.780369 | 0.817152  |
| 6                | 6                | 0              | 0.899337                | -1.003266 | -0.024709 |
| 7                | 1                | 0              | 0.065229                | -2.329822 | -1.501933 |
| 8                | 1                | 0              | 1.983382                | -3.913943 | -1.451967 |
| 9                | 1                | 0              | 3.923589                | -1.496444 | 1.492739  |
| 10               | 1                | 0              | 1.992701                | 0.070772  | 1.488756  |
| 11               | 6                | 0              | -0.253304               | -0.081210 | -0.033763 |
| 12               | 6                | 0              | -0.125879               | 1.272396  | -0.056659 |
| 13               | 6                | 0              | -1.600756               | -0.651323 | -0.024875 |
| 14               | 1                | 0              | -1.659183               | -1.727572 | 0.185435  |
| 15               | 1                | 0              | -1.035509               | 1.862906  | -0.025189 |
| 16               | 7                | 0              | -2.655899               | 0.035770  | -0.230883 |
| 17               | 7                | 0              | 1.033108                | 1.966592  | -0.180553 |
| 18               | 1                | 0              | 1.869390                | 1.446984  | -0.411307 |
| 19               | 7                | 0              | 4.181473                | -3.702044 | 0.028431  |
| 20               | 8                | 0              | 5.117192                | -3.431701 | 0.750755  |
| 21               | 8                | 0              | 4.113842                | -4.682401 | -0.681200 |
| 22               | 6                | 0              | 1.172769                | 3.359949  | -0.086561 |
| 23               | 6                | 0              | 2.312783                | 3.953959  | -0.634569 |
| 24               | 6                | 0              | 0.223050                | 4.155159  | 0.557589  |
| 25               | 6                | 0              | 2.494867                | 5.326109  | -0.546185 |
| 26               | 1                | 0              | 3.048387                | 3.335898  | -1.138434 |
| 27               | 6                | 0              | 0.409796                | 5.530796  | 0.624358  |
| 28               | 1                | 0              | -0.643789               | 3.707307  | 1.026388  |
| 29               | 6                | 0              | 1.541391                | 6.125275  | 0.077590  |
| 30               | 1                | 0              | 3.383809                | 5.772573  | -0.975371 |
| 31               | 1                | 0              | -0.333458               | 6.138828  | 1.126111  |
| 32               | 1                | 0              | 1.682629                | 7.196655  | 0.142037  |
| 33               | 6                | 0              | -3.906095               | -0.588648 | -0.065607 |
| 34               | 6                | 0              | -4.923600               | -0.280816 | -0.973587 |
| 35               | 6                | 0              | -4.178394               | -1.462753 | 0.992536  |
| 36               | 6                | 0              | -6.171690               | -0.875574 | -0.854594 |
| 37               | 1                | 0              | -4.708925               | 0.419209  | -1.772205 |
| 38               | 6                | 0              | -5.435111               | -2.045717 | 1.113162  |
| 39               | 1                | 0              | -3.413864               | -1.655901 | 1.736805  |
| 40               | 6                | 0              | -6.433327               | -1.762067 | 0.188045  |
| 41               | 1                | 0              | -6.948223               | -0.641402 | -1.573442 |
| 42               | 1                | 0              | -5.637178               | -2.715171 | 1.941280  |
| 43               | 1                | 0              | -7.412318               | -2.215324 | 0.286472  |

## Structure 30b (CHCl<sub>3</sub>)

Energy (Hartrees): -1124.92736721

No imaginary frequencies

Standard orientation:

| Center<br>Number | Atomic<br>Number | Atomic<br>Type | Coordinates (Angstroms) |           |           |
|------------------|------------------|----------------|-------------------------|-----------|-----------|
|                  |                  |                | X                       | Y         | Z         |
| 1                | 6                | 0              | 0.850392                | -2.199914 | -0.744204 |
| 2                | 6                | 0              | 1.906728                | -3.096512 | -0.734932 |
| 3                | 6                | 0              | 3.033138                | -2.787538 | 0.015598  |
| 4                | 6                | 0              | 3.125534                | -1.620983 | 0.763946  |
| 5                | 6                | 0              | 2.057633                | -0.739739 | 0.749192  |
| 6                | 6                | 0              | 0.904998                | -1.004147 | -0.010346 |
| 7                | 1                | 0              | -0.025217               | -2.423623 | -1.342845 |
| 8                | 1                | 0              | 1.868414                | -4.014229 | -1.306636 |
| 9                | 1                | 0              | 4.008158                | -1.420221 | 1.356660  |
| 10               | 1                | 0              | 2.103766                | 0.151739  | 1.364336  |
| 11               | 6                | 0              | -0.241320               | -0.075699 | -0.014734 |
| 12               | 6                | 0              | -0.115336               | 1.283614  | -0.043712 |
| 13               | 6                | 0              | -1.587291               | -0.640431 | 0.008495  |
| 14               | 1                | 0              | -1.654637               | -1.698633 | 0.289963  |
| 15               | 1                | 0              | -1.021573               | 1.876419  | 0.025521  |
| 16               | 7                | 0              | -2.641438               | 0.028849  | -0.272019 |
| 17               | 7                | 0              | 1.030673                | 1.980275  | -0.202868 |
| 18               | 1                | 0              | 1.864056                | 1.474195  | -0.478906 |
| 19               | 7                | 0              | 4.158152                | -3.729129 | 0.027173  |
| 20               | 8                | 0              | 5.146341                | -3.429466 | 0.667993  |
| 21               | 8                | 0              | 4.047107                | -4.760917 | -0.604952 |
| 22               | 6                | 0              | 1.168330                | 3.373617  | -0.097807 |
| 23               | 6                | 0              | 2.299540                | 3.970413  | -0.662631 |
| 24               | 6                | 0              | 0.229964                | 4.162019  | 0.572183  |
| 25               | 6                | 0              | 2.482518                | 5.342725  | -0.566851 |
| 26               | 1                | 0              | 3.025689                | 3.353179  | -1.181350 |
| 27               | 6                | 0              | 0.418816                | 5.537857  | 0.647411  |
| 28               | 1                | 0              | -0.629142               | 3.709525  | 1.051901  |
| 29               | 6                | 0              | 1.540583                | 6.136835  | 0.082833  |
| 30               | 1                | 0              | 3.363595                | 5.793412  | -1.009032 |
| 31               | 1                | 0              | -0.314762               | 6.141921  | 1.168965  |
| 32               | 1                | 0              | 1.683650                | 7.208258  | 0.153732  |
| 33               | 6                | 0              | -3.894374               | -0.586035 | -0.086356 |
| 34               | 6                | 0              | -4.887510               | -0.363086 | -1.047114 |
| 35               | 6                | 0              | -4.194936               | -1.367965 | 1.035526  |
| 36               | 6                | 0              | -6.139341               | -0.948632 | -0.911583 |
| 37               | 1                | 0              | -4.653215               | 0.263227  | -1.900768 |
| 38               | 6                | 0              | -5.455575               | -1.941779 | 1.171142  |
| 39               | 1                | 0              | -3.447953               | -1.501553 | 1.810633  |
| 40               | 6                | 0              | -6.429814               | -1.741615 | 0.197690  |
| 41               | 1                | 0              | -6.895101               | -0.780863 | -1.670820 |
| 42               | 1                | 0              | -5.680062               | -2.539143 | 2.047931  |
| 43               | 1                | 0              | -7.411017               | -2.188535 | 0.307917  |

## Structure 30b (DMSO)

Energy (Hartrees): -1124.92247776

No imaginary frequencies

Standard orientation:

| Center<br>Number | Atomic<br>Number | Atomic<br>Type | Coordinates (Angstroms) |           |           |
|------------------|------------------|----------------|-------------------------|-----------|-----------|
|                  |                  |                | X                       | Y         | Z         |
| 1                | 6                | 0              | 0.862764                | -2.170023 | -0.764747 |
| 2                | 6                | 0              | 1.916013                | -3.069629 | -0.770067 |
| 3                | 6                | 0              | 3.034155                | -2.785304 | 0.002808  |
| 4                | 6                | 0              | 3.120765                | -1.641238 | 0.786020  |
| 5                | 6                | 0              | 2.056616                | -0.754841 | 0.783383  |
| 6                | 6                | 0              | 0.912408                | -0.996137 | 0.004362  |
| 7                | 1                | 0              | -0.006799               | -2.374257 | -1.378773 |
| 8                | 1                | 0              | 1.877788                | -3.969073 | -1.369889 |
| 9                | 1                | 0              | 3.996135                | -1.457595 | 1.394533  |
| 10               | 1                | 0              | 2.103069                | 0.119843  | 1.422166  |
| 11               | 6                | 0              | -0.233885               | -0.068028 | 0.007936  |
| 12               | 6                | 0              | -0.110299               | 1.293453  | -0.000307 |
| 13               | 6                | 0              | -1.574921               | -0.638467 | 0.011973  |
| 14               | 1                | 0              | -1.634427               | -1.704858 | 0.258794  |
| 15               | 1                | 0              | -1.019327               | 1.881292  | 0.063135  |
| 16               | 7                | 0              | -2.637898               | 0.029385  | -0.248771 |
| 17               | 7                | 0              | 1.033029                | 1.995914  | -0.125932 |
| 18               | 1                | 0              | 1.883918                | 1.494809  | -0.358411 |
| 19               | 7                | 0              | 4.157243                | -3.727958 | -0.002503 |
| 20               | 8                | 0              | 5.129334                | -3.465251 | 0.679705  |
| 21               | 8                | 0              | 4.062621                | -4.727827 | -0.688588 |
| 22               | 6                | 0              | 1.154838                | 3.393022  | -0.060492 |
| 23               | 6                | 0              | 2.333934                | 3.970317  | -0.543633 |
| 24               | 6                | 0              | 0.156768                | 4.206685  | 0.482713  |
| 25               | 6                | 0              | 2.504749                | 5.347144  | -0.496607 |
| 26               | 1                | 0              | 3.107331                | 3.331967  | -0.958111 |
| 27               | 6                | 0              | 0.337129                | 5.585834  | 0.511775  |
| 28               | 1                | 0              | -0.745751               | 3.777233  | 0.898968  |
| 29               | 6                | 0              | 1.505093                | 6.165692  | 0.025194  |
| 30               | 1                | 0              | 3.423060                | 5.781208  | -0.875285 |
| 31               | 1                | 0              | -0.443063               | 6.208988  | 0.933995  |
| 32               | 1                | 0              | 1.638393                | 7.240297  | 0.058386  |
| 33               | 6                | 0              | -3.882981               | -0.605654 | -0.077265 |
| 34               | 6                | 0              | -4.896398               | -0.333950 | -1.004600 |
| 35               | 6                | 0              | -4.158993               | -1.454496 | 1.002825  |
| 36               | 6                | 0              | -6.144278               | -0.931255 | -0.877942 |
| 37               | 1                | 0              | -4.684788               | 0.340724  | -1.827007 |
| 38               | 6                | 0              | -5.414147               | -2.042488 | 1.128409  |
| 39               | 1                | 0              | -3.397669               | -1.630572 | 1.754955  |
| 40               | 6                | 0              | -6.409479               | -1.789907 | 0.188384  |
| 41               | 1                | 0              | -6.915553               | -0.721546 | -1.610648 |
| 42               | 1                | 0              | -5.616969               | -2.692619 | 1.972309  |
| 43               | 1                | 0              | -7.386713               | -2.246988 | 0.291650  |

## Structure 30b (C<sub>2</sub>H<sub>5</sub>OH)

Energy (Hartrees): -1124.92447459

No imaginary frequencies

Standard orientation:

| Center<br>Number | Atomic<br>Number | Atomic<br>Type | Coordinates (Angstroms) |           |           |
|------------------|------------------|----------------|-------------------------|-----------|-----------|
|                  |                  |                | X                       | Y         | Z         |
| 1                | 6                | 0              | 0.831746                | -2.197959 | -0.779248 |
| 2                | 6                | 0              | 1.876716                | -3.106919 | -0.761907 |
| 3                | 6                | 0              | 2.991631                | -2.819877 | 0.015451  |
| 4                | 6                | 0              | 3.083343                | -1.663994 | 0.781940  |
| 5                | 6                | 0              | 2.028297                | -0.769029 | 0.755078  |
| 6                | 6                | 0              | 0.888181                | -1.011409 | -0.030158 |
| 7                | 1                | 0              | -0.035669               | -2.405384 | -1.395622 |
| 8                | 1                | 0              | 1.834934                | -4.015567 | -1.347945 |
| 9                | 1                | 0              | 3.954968                | -1.476656 | 1.394946  |
| 10               | 1                | 0              | 2.076460                | 0.116230  | 1.379026  |
| 11               | 6                | 0              | -0.245463               | -0.068044 | -0.042001 |
| 12               | 6                | 0              | -0.098053               | 1.291454  | -0.058372 |
| 13               | 6                | 0              | -1.595231               | -0.616531 | -0.023736 |
| 14               | 1                | 0              | -1.670901               | -1.680005 | 0.232028  |
| 15               | 1                | 0              | -0.993949               | 1.898983  | 0.017536  |
| 16               | 7                | 0              | -2.648692               | 0.068177  | -0.279876 |
| 17               | 7                | 0              | 1.056176                | 1.970910  | -0.210759 |
| 18               | 1                | 0              | 1.889038                | 1.456634  | -0.476949 |
| 19               | 7                | 0              | 4.103500                | -3.768220 | 0.034051  |
| 20               | 8                | 0              | 5.066909                | -3.514212 | 0.733358  |
| 21               | 8                | 0              | 4.021541                | -4.771745 | -0.649854 |
| 22               | 6                | 0              | 1.212305                | 3.361922  | -0.096436 |
| 23               | 6                | 0              | 2.360445                | 3.942131  | -0.644846 |
| 24               | 6                | 0              | 0.277808                | 4.162532  | 0.564848  |
| 25               | 6                | 0              | 2.562932                | 5.311660  | -0.543817 |
| 26               | 1                | 0              | 3.085073                | 3.312804  | -1.151311 |
| 27               | 6                | 0              | 0.487203                | 5.535488  | 0.646048  |
| 28               | 1                | 0              | -0.594433               | 3.724003  | 1.033857  |
| 29               | 6                | 0              | 1.624662                | 6.118997  | 0.095959  |
| 30               | 1                | 0              | 3.457279                | 5.749405  | -0.972825 |
| 31               | 1                | 0              | -0.243219               | 6.149457  | 1.160957  |
| 32               | 1                | 0              | 1.783148                | 7.188217  | 0.171582  |
| 33               | 6                | 0              | -3.902313               | -0.544587 | -0.087765 |
| 34               | 6                | 0              | -4.924498               | -0.258827 | -1.000439 |
| 35               | 6                | 0              | -4.176927               | -1.382963 | 1.000384  |
| 36               | 6                | 0              | -6.179844               | -0.835802 | -0.854114 |
| 37               | 1                | 0              | -4.714290               | 0.409733  | -1.828337 |
| 38               | 6                | 0              | -5.439299               | -1.950579 | 1.146078  |
| 39               | 1                | 0              | -3.408390               | -1.566244 | 1.743805  |
| 40               | 6                | 0              | -6.443374               | -1.686327 | 0.218786  |
| 41               | 1                | 0              | -6.958251               | -0.617060 | -1.576873 |
| 42               | 1                | 0              | -5.641536               | -2.593224 | 1.996113  |
| 43               | 1                | 0              | -7.426354               | -2.127752 | 0.337664  |

### Structure 30c (vacuum)

Energy (Hartrees): -1124.89426737  
No imaginary frequencies

Standard orientation:

| Center<br>Number | Atomic<br>Number | Atomic<br>Type | Coordinates (Angstroms) |           |           |
|------------------|------------------|----------------|-------------------------|-----------|-----------|
|                  |                  |                | X                       | Y         | Z         |
| 1                | 6                | 0              | 0.775181                | 1.702573  | -0.859143 |
| 2                | 6                | 0              | 0.698454                | 3.086194  | -0.886550 |
| 3                | 6                | 0              | -0.157737               | 3.722556  | 0.000176  |
| 4                | 6                | 0              | -0.928457               | 3.025045  | 0.916742  |
| 5                | 6                | 0              | -0.842129               | 1.640158  | 0.929420  |
| 6                | 6                | 0              | -0.001657               | 0.960173  | 0.038619  |
| 7                | 1                | 0              | 1.448359                | 1.187274  | -1.530733 |
| 8                | 1                | 0              | 1.286720                | 3.674446  | -1.577692 |
| 9                | 1                | 0              | -1.566608               | 3.564219  | 1.603623  |
| 10               | 1                | 0              | -1.414991               | 1.076746  | 1.657795  |
| 11               | 6                | 0              | 0.062956                | -0.518858 | 0.050732  |
| 12               | 6                | 0              | -1.050737               | -1.296077 | 0.019196  |
| 13               | 6                | 0              | 1.344659                | -1.209573 | 0.057986  |
| 14               | 1                | 0              | -0.935996               | -2.374807 | 0.040841  |
| 15               | 1                | 0              | 1.286233                | -2.307337 | 0.060285  |
| 16               | 7                | 0              | 2.468715                | -0.609857 | 0.083744  |
| 17               | 7                | 0              | -2.334923               | -0.862730 | -0.096479 |
| 18               | 1                | 0              | -2.479064               | 0.116285  | -0.304741 |
| 19               | 7                | 0              | -0.248552               | 5.195639  | -0.027435 |
| 20               | 8                | 0              | -1.004508               | 5.725325  | 0.759072  |
| 21               | 8                | 0              | 0.434708                | 5.785234  | -0.836361 |
| 22               | 6                | 0              | 3.642388                | -1.385658 | 0.038738  |
| 23               | 6                | 0              | 4.707399                | -1.026692 | 0.870069  |
| 24               | 6                | 0              | 3.796089                | -2.462448 | -0.840913 |
| 25               | 6                | 0              | 5.884339                | -1.762053 | 0.854913  |
| 26               | 1                | 0              | 4.585626                | -0.174063 | 1.527285  |
| 27               | 6                | 0              | 4.983838                | -3.185451 | -0.861520 |
| 28               | 1                | 0              | 2.995899                | -2.707692 | -1.530366 |
| 29               | 6                | 0              | 6.028525                | -2.845013 | -0.009708 |
| 30               | 1                | 0              | 6.698391                | -1.483663 | 1.513922  |
| 31               | 1                | 0              | 5.095725                | -4.010580 | -1.555339 |
| 32               | 1                | 0              | 6.953119                | -3.408946 | -0.028559 |
| 33               | 6                | 0              | -3.477411               | -1.675843 | -0.055810 |
| 34               | 6                | 0              | -4.656604               | -1.208981 | -0.642932 |
| 35               | 6                | 0              | -3.470132               | -2.921370 | 0.575449  |
| 36               | 6                | 0              | -5.806694               | -1.984059 | -0.607930 |
| 37               | 1                | 0              | -4.662406               | -0.242613 | -1.135708 |
| 38               | 6                | 0              | -4.624386               | -3.696011 | 0.587373  |
| 39               | 1                | 0              | -2.582084               | -3.275978 | 1.083186  |
| 40               | 6                | 0              | -5.796787               | -3.236466 | -0.000992 |
| 41               | 1                | 0              | -6.713576               | -1.608896 | -1.066921 |
| 42               | 1                | 0              | -4.606348               | -4.660901 | 1.079995  |
| 43               | 1                | 0              | -6.693878               | -3.842205 | 0.019133  |



## Structure 30c (CHCl<sub>3</sub>)

Energy (Hartrees): -1124.92964833

No imaginary frequencies

Standard orientation:

| Center<br>Number | Atomic<br>Number | Atomic<br>Type | Coordinates (Angstroms) |           |           |
|------------------|------------------|----------------|-------------------------|-----------|-----------|
|                  |                  |                | X                       | Y         | Z         |
| 1                | 6                | 0              | -0.726562               | 1.658389  | 0.912045  |
| 2                | 6                | 0              | -0.666316               | 3.041255  | 0.963272  |
| 3                | 6                | 0              | 0.124267                | 3.704706  | 0.033828  |
| 4                | 6                | 0              | 0.846182                | 3.034266  | -0.942231 |
| 5                | 6                | 0              | 0.775218                | 1.648841  | -0.977200 |
| 6                | 6                | 0              | -0.001560               | 0.942513  | -0.049902 |
| 7                | 1                | 0              | -1.340120               | 1.123069  | 1.625258  |
| 8                | 1                | 0              | -1.216844               | 3.599819  | 1.708307  |
| 9                | 1                | 0              | 1.437389                | 3.585284  | -1.661344 |
| 10               | 1                | 0              | 1.312120                | 1.110309  | -1.750692 |
| 11               | 6                | 0              | -0.059246               | -0.537383 | -0.082844 |
| 12               | 6                | 0              | 1.057069                | -1.320634 | -0.080336 |
| 13               | 6                | 0              | -1.335984               | -1.226200 | -0.086824 |
| 14               | 1                | 0              | 0.929627                | -2.397142 | -0.111731 |
| 15               | 1                | 0              | -1.276867               | -2.321759 | -0.068649 |
| 16               | 7                | 0              | -2.464747               | -0.626225 | -0.135279 |
| 17               | 7                | 0              | 2.336735                | -0.886311 | -0.003375 |
| 18               | 1                | 0              | 2.487524                | 0.107048  | 0.125385  |
| 19               | 7                | 0              | 0.194656                | 5.172525  | 0.083478  |
| 20               | 8                | 0              | 0.887466                | 5.738773  | -0.738267 |
| 21               | 8                | 0              | -0.441467               | 5.745173  | 0.944959  |
| 22               | 6                | 0              | -3.639534               | -1.398998 | -0.074284 |
| 23               | 6                | 0              | -4.723684               | -1.021223 | -0.875006 |
| 24               | 6                | 0              | -3.782700               | -2.488154 | 0.794312  |
| 25               | 6                | 0              | -5.908867               | -1.744616 | -0.839106 |
| 26               | 1                | 0              | -4.614419               | -0.162157 | -1.527506 |
| 27               | 6                | 0              | -4.976826               | -3.200970 | 0.833858  |
| 28               | 1                | 0              | -2.967136               | -2.754805 | 1.457493  |
| 29               | 6                | 0              | -6.041971               | -2.838202 | 0.014899  |
| 30               | 1                | 0              | -6.736737               | -1.448951 | -1.473842 |
| 31               | 1                | 0              | -5.077610               | -4.035930 | 1.518368  |
| 32               | 1                | 0              | -6.971863               | -3.393526 | 0.050508  |
| 33               | 6                | 0              | 3.494947                | -1.677817 | 0.012856  |
| 34               | 6                | 0              | 4.708866                | -1.043531 | 0.298103  |
| 35               | 6                | 0              | 3.483129                | -3.049280 | -0.254684 |
| 36               | 6                | 0              | 5.890419                | -1.770296 | 0.322815  |
| 37               | 1                | 0              | 4.716883                | 0.022416  | 0.501690  |
| 38               | 6                | 0              | 4.674509                | -3.766719 | -0.219383 |
| 39               | 1                | 0              | 2.564377                | -3.564617 | -0.502469 |
| 40               | 6                | 0              | 5.882206                | -3.139528 | 0.068558  |
| 41               | 1                | 0              | 6.821278                | -1.261210 | 0.545025  |
| 42               | 1                | 0              | 4.652394                | -4.830144 | -0.428877 |
| 43               | 1                | 0              | 6.804135                | -3.707696 | 0.089310  |

## Structure 30c (DMSO)

Energy (Hartrees): -1124.92612573

No imaginary frequencies

Standard orientation:

| Center<br>Number | Atomic<br>Number | Atomic<br>Type | Coordinates (Angstroms) |           |           |
|------------------|------------------|----------------|-------------------------|-----------|-----------|
|                  |                  |                | X                       | Y         | Z         |
| 1                | 6                | 0              | -0.716620               | 1.672591  | 0.931606  |
| 2                | 6                | 0              | -0.664310               | 3.055862  | 0.977364  |
| 3                | 6                | 0              | 0.109813                | 3.720501  | 0.034117  |
| 4                | 6                | 0              | 0.825299                | 3.049844  | -0.946773 |
| 5                | 6                | 0              | 0.762535                | 1.663958  | -0.975788 |
| 6                | 6                | 0              | -0.000819               | 0.957021  | -0.038191 |
| 7                | 1                | 0              | -1.311679               | 1.137153  | 1.660885  |
| 8                | 1                | 0              | -1.207042               | 3.610456  | 1.731215  |
| 9                | 1                | 0              | 1.409474                | 3.597287  | -1.674273 |
| 10               | 1                | 0              | 1.300089                | 1.127127  | -1.749898 |
| 11               | 6                | 0              | -0.055173               | -0.522564 | -0.066646 |
| 12               | 6                | 0              | 1.062683                | -1.307849 | -0.068248 |
| 13               | 6                | 0              | -1.325899               | -1.215548 | -0.070734 |
| 14               | 1                | 0              | 0.930628                | -2.383868 | -0.095119 |
| 15               | 1                | 0              | -1.260489               | -2.309910 | -0.042052 |
| 16               | 7                | 0              | -2.461536               | -0.623078 | -0.135501 |
| 17               | 7                | 0              | 2.340168                | -0.875835 | -0.002679 |
| 18               | 1                | 0              | 2.501678                | 0.118660  | 0.113221  |
| 19               | 7                | 0              | 0.171871                | 5.187768  | 0.076540  |
| 20               | 8                | 0              | 0.840665                | 5.756928  | -0.764100 |
| 21               | 8                | 0              | -0.447870               | 5.761404  | 0.951022  |
| 22               | 6                | 0              | -3.627096               | -1.409904 | -0.075173 |
| 23               | 6                | 0              | -4.713657               | -1.050327 | -0.882118 |
| 24               | 6                | 0              | -3.760754               | -2.497868 | 0.797792  |
| 25               | 6                | 0              | -5.890058               | -1.789175 | -0.848694 |
| 26               | 1                | 0              | -4.615459               | -0.194312 | -1.540958 |
| 27               | 6                | 0              | -4.945623               | -3.226699 | 0.833820  |
| 28               | 1                | 0              | -2.944002               | -2.754599 | 1.463665  |
| 29               | 6                | 0              | -6.012451               | -2.882191 | 0.008063  |
| 30               | 1                | 0              | -6.718228               | -1.506771 | -1.489316 |
| 31               | 1                | 0              | -5.037290               | -4.061828 | 1.519628  |
| 32               | 1                | 0              | -6.934438               | -3.451052 | 0.039881  |
| 33               | 6                | 0              | 3.494278                | -1.674157 | 0.009229  |
| 34               | 6                | 0              | 4.712889                | -1.046135 | 0.290149  |
| 35               | 6                | 0              | 3.471467                | -3.045998 | -0.257049 |
| 36               | 6                | 0              | 5.889691                | -1.781651 | 0.313461  |
| 37               | 1                | 0              | 4.725822                | 0.020205  | 0.491331  |
| 38               | 6                | 0              | 4.658312                | -3.771512 | -0.223432 |
| 39               | 1                | 0              | 2.547872                | -3.555073 | -0.500251 |
| 40               | 6                | 0              | 5.871249                | -3.151768 | 0.061366  |
| 41               | 1                | 0              | 6.824833                | -1.278912 | 0.532966  |
| 42               | 1                | 0              | 4.628384                | -4.835266 | -0.430958 |
| 43               | 1                | 0              | 6.789412                | -3.726526 | 0.081415  |

## Structure 30c (C<sub>2</sub>H<sub>5</sub>OH)

Energy (Hartrees): -1124.92763776

No imaginary frequencies

Standard orientation:

| Center<br>Number | Atomic<br>Number | Atomic<br>Type | Coordinates (Angstroms) |           |           |
|------------------|------------------|----------------|-------------------------|-----------|-----------|
|                  |                  |                | X                       | Y         | Z         |
| 1                | 6                | 0              | -0.710869               | 1.683021  | 0.923314  |
| 2                | 6                | 0              | -0.647772               | 3.065358  | 0.969184  |
| 3                | 6                | 0              | 0.141593                | 3.722077  | 0.032614  |
| 4                | 6                | 0              | 0.857691                | 3.046045  | -0.944720 |
| 5                | 6                | 0              | 0.778098                | 1.661554  | -0.977392 |
| 6                | 6                | 0              | 0.003398                | 0.961362  | -0.043446 |
| 7                | 1                | 0              | -1.312786               | 1.152702  | 1.650633  |
| 8                | 1                | 0              | -1.189296               | 3.624363  | 1.720765  |
| 9                | 1                | 0              | 1.449827                | 3.588371  | -1.669932 |
| 10               | 1                | 0              | 1.310587                | 1.120263  | -1.751996 |
| 11               | 6                | 0              | -0.063137               | -0.517284 | -0.070897 |
| 12               | 6                | 0              | 1.048500                | -1.311069 | -0.068554 |
| 13               | 6                | 0              | -1.339317               | -1.201003 | -0.073846 |
| 14               | 1                | 0              | 0.907934                | -2.386058 | -0.093080 |
| 15               | 1                | 0              | -1.281591               | -2.295581 | -0.038931 |
| 16               | 7                | 0              | -2.470972               | -0.602398 | -0.145605 |
| 17               | 7                | 0              | 2.329782                | -0.889962 | 0.000919  |
| 18               | 1                | 0              | 2.498827                | 0.103424  | 0.114244  |
| 19               | 7                | 0              | 0.220575                | 5.183978  | 0.079012  |
| 20               | 8                | 0              | 0.994330                | 5.744445  | -0.673931 |
| 21               | 8                | 0              | -0.489251               | 5.775245  | 0.869966  |
| 22               | 6                | 0              | -3.639716               | -1.385010 | -0.080485 |
| 23               | 6                | 0              | -4.718967               | -1.040700 | -0.903162 |
| 24               | 6                | 0              | -3.781867               | -2.453793 | 0.814117  |
| 25               | 6                | 0              | -5.896950               | -1.776615 | -0.862820 |
| 26               | 1                | 0              | -4.614397               | -0.199439 | -1.579768 |
| 27               | 6                | 0              | -4.968294               | -3.179749 | 0.856973  |
| 28               | 1                | 0              | -2.970479               | -2.696365 | 1.492026  |
| 29               | 6                | 0              | -6.028102               | -2.850802 | 0.016207  |
| 30               | 1                | 0              | -6.719835               | -1.506305 | -1.515489 |
| 31               | 1                | 0              | -5.067052               | -3.999575 | 1.560198  |
| 32               | 1                | 0              | -6.951789               | -3.416767 | 0.053509  |
| 33               | 6                | 0              | 3.477357                | -1.698324 | 0.012504  |
| 34               | 6                | 0              | 4.701558                | -1.080689 | 0.291122  |
| 35               | 6                | 0              | 3.442432                | -3.069991 | -0.252566 |
| 36               | 6                | 0              | 5.872108                | -1.826178 | 0.313386  |
| 37               | 1                | 0              | 4.724452                | -0.014248 | 0.491269  |
| 38               | 6                | 0              | 4.623016                | -3.805766 | -0.219752 |
| 39               | 1                | 0              | 2.514439                | -3.571725 | -0.494604 |
| 40               | 6                | 0              | 5.841583                | -3.196247 | 0.062696  |
| 41               | 1                | 0              | 6.811935                | -1.330954 | 0.530548  |
| 42               | 1                | 0              | 4.583764                | -4.869470 | -0.426563 |
| 43               | 1                | 0              | 6.755075                | -3.778674 | 0.081739  |

### Structure 30d (vacuum)

Energy (Hartrees): -1124.88957826

No imaginary frequencies

Standard orientation:

| Center<br>Number | Atomic<br>Number | Atomic<br>Type | Coordinates (Angstroms) |           |           |
|------------------|------------------|----------------|-------------------------|-----------|-----------|
|                  |                  |                | X                       | Y         | Z         |
| 1                | 6                | 0              | -2.212126               | -0.310655 | 0.722044  |
| 2                | 6                | 0              | -3.443637               | -0.939900 | 0.780507  |
| 3                | 6                | 0              | -3.644899               | -2.084901 | 0.021727  |
| 4                | 6                | 0              | -2.658157               | -2.610661 | -0.795601 |
| 5                | 6                | 0              | -1.431524               | -1.964648 | -0.847433 |
| 6                | 6                | 0              | -1.181026               | -0.818473 | -0.081389 |
| 7                | 1                | 0              | -2.042783               | 0.584302  | 1.304336  |
| 8                | 1                | 0              | -4.243579               | -0.562937 | 1.402997  |
| 9                | 1                | 0              | -2.864110               | -3.493585 | -1.385475 |
| 10               | 1                | 0              | -0.666194               | -2.338697 | -1.517146 |
| 11               | 6                | 0              | 0.152109                | -0.179322 | -0.104153 |
| 12               | 6                | 0              | 1.260832                | -0.966740 | -0.149794 |
| 13               | 6                | 0              | 0.291260                | 1.271519  | -0.054202 |
| 14               | 1                | 0              | 1.298255                | 1.656421  | 0.158738  |
| 15               | 1                | 0              | 2.700610                | 0.369358  | -0.730220 |
| 16               | 1                | 0              | 1.153889                | -2.042742 | -0.050722 |
| 17               | 7                | 0              | -0.678982               | 2.080092  | -0.229394 |
| 18               | 7                | 0              | 2.545922                | -0.546118 | -0.336705 |
| 19               | 7                | 0              | -4.954920               | -2.758324 | 0.078317  |
| 20               | 8                | 0              | -5.103849               | -3.756777 | -0.594506 |
| 21               | 8                | 0              | -5.804634               | -2.275419 | 0.796062  |
| 22               | 6                | 0              | -0.440036               | 3.459046  | -0.077590 |
| 23               | 6                | 0              | -1.059849               | 4.332383  | -0.976145 |
| 24               | 6                | 0              | 0.346552                | 3.982689  | 0.954162  |
| 25               | 6                | 0              | -0.850935               | 5.700349  | -0.876646 |
| 26               | 1                | 0              | -1.692293               | 3.913599  | -1.749611 |
| 27               | 6                | 0              | 0.538286                | 5.356190  | 1.057157  |
| 28               | 1                | 0              | 0.774699                | 3.315162  | 1.693806  |
| 29               | 6                | 0              | -0.050214               | 6.218696  | 0.138952  |
| 30               | 1                | 0              | -1.323174               | 6.368060  | -1.587711 |
| 31               | 1                | 0              | 1.140395                | 5.753096  | 1.866195  |
| 32               | 1                | 0              | 0.099752                | 7.288175  | 0.222918  |
| 33               | 6                | 0              | 3.689481                | -1.327374 | -0.113169 |
| 34               | 6                | 0              | 4.879599                | -0.976141 | -0.756503 |
| 35               | 6                | 0              | 3.668079                | -2.430422 | 0.742375  |
| 36               | 6                | 0              | 6.027708                | -1.726649 | -0.555456 |
| 37               | 1                | 0              | 4.895633                | -0.118574 | -1.420898 |
| 38               | 6                | 0              | 4.821378                | -3.186593 | 0.919555  |
| 39               | 1                | 0              | 2.769254                | -2.680911 | 1.291919  |
| 40               | 6                | 0              | 6.004549                | -2.842949 | 0.276654  |
| 41               | 1                | 0              | 6.943445                | -1.442614 | -1.059936 |
| 42               | 1                | 0              | 4.794399                | -4.042265 | 1.583723  |
| 43               | 1                | 0              | 6.900950                | -3.430494 | 0.428803  |

## Structure 30d (CHCl<sub>3</sub>)

Energy (Hartrees): -1124.92613701

No imaginary frequencies

Standard orientation:

| Center<br>Number | Atomic<br>Number | Atomic<br>Type | Coordinates (Angstroms) |           |           |
|------------------|------------------|----------------|-------------------------|-----------|-----------|
|                  |                  |                | X                       | Y         | Z         |
| 1                | 6                | 0              | -2.214847               | -0.334161 | 0.723998  |
| 2                | 6                | 0              | -3.437215               | -0.980165 | 0.775311  |
| 3                | 6                | 0              | -3.613999               | -2.134635 | 0.021756  |
| 4                | 6                | 0              | -2.609248               | -2.650319 | -0.783315 |
| 5                | 6                | 0              | -1.393153               | -1.985933 | -0.829275 |
| 6                | 6                | 0              | -1.166359               | -0.828737 | -0.068820 |
| 7                | 1                | 0              | -2.065743               | 0.561324  | 1.311894  |
| 8                | 1                | 0              | -4.241686               | -0.606056 | 1.394296  |
| 9                | 1                | 0              | -2.785093               | -3.540920 | -1.371976 |
| 10               | 1                | 0              | -0.617015               | -2.358859 | -1.487370 |
| 11               | 6                | 0              | 0.154306                | -0.166008 | -0.079888 |
| 12               | 6                | 0              | 1.278503                | -0.942345 | -0.116669 |
| 13               | 6                | 0              | 0.267532                | 1.283100  | -0.024895 |
| 14               | 1                | 0              | 1.260830                | 1.686121  | 0.208636  |
| 15               | 1                | 0              | 2.722147                | 0.438681  | -0.562509 |
| 16               | 1                | 0              | 1.173299                | -2.019523 | -0.039507 |
| 17               | 7                | 0              | -0.711754               | 2.078210  | -0.234935 |
| 18               | 7                | 0              | 2.556657                | -0.511493 | -0.257724 |
| 19               | 7                | 0              | -4.906436               | -2.825674 | 0.074293  |
| 20               | 8                | 0              | -5.032935               | -3.853646 | -0.562592 |
| 21               | 8                | 0              | -5.788065               | -2.338566 | 0.754599  |
| 22               | 6                | 0              | -0.496916               | 3.462118  | -0.087150 |
| 23               | 6                | 0              | -1.123326               | 4.321816  | -0.996056 |
| 24               | 6                | 0              | 0.273046                | 4.005572  | 0.948498  |
| 25               | 6                | 0              | -0.940149               | 5.694973  | -0.901613 |
| 26               | 1                | 0              | -1.740630               | 3.892042  | -1.776919 |
| 27               | 6                | 0              | 0.441325                | 5.383302  | 1.044485  |
| 28               | 1                | 0              | 0.712288                | 3.349550  | 1.692188  |
| 29               | 6                | 0              | -0.155602               | 6.232507  | 0.117529  |
| 30               | 1                | 0              | -1.418067               | 6.350408  | -1.621048 |
| 31               | 1                | 0              | 1.032845                | 5.794406  | 1.854988  |
| 32               | 1                | 0              | -0.023443               | 7.305287  | 0.196300  |
| 33               | 6                | 0              | 3.708055                | -1.296183 | -0.082690 |
| 34               | 6                | 0              | 4.914136                | -0.817683 | -0.605594 |
| 35               | 6                | 0              | 3.687423                | -2.512855 | 0.603433  |
| 36               | 6                | 0              | 6.080922                | -1.551979 | -0.451816 |
| 37               | 1                | 0              | 4.924846                | 0.128013  | -1.137570 |
| 38               | 6                | 0              | 4.861980                | -3.246985 | 0.735150  |
| 39               | 1                | 0              | 2.775362                | -2.880135 | 1.057374  |
| 40               | 6                | 0              | 6.062101                | -2.775973 | 0.213259  |
| 41               | 1                | 0              | 7.008595                | -1.167503 | -0.860167 |
| 42               | 1                | 0              | 4.835472                | -4.189734 | 1.269549  |
| 43               | 1                | 0              | 6.973623                | -3.349277 | 0.330499  |

## Structure 30d (DMSO)

Energy (Hartrees): -1124.92255469

No imaginary frequencies

Standard orientation:

| Center<br>Number | Atomic<br>Number | Atomic<br>Type | Coordinates (Angstroms) |           |           |
|------------------|------------------|----------------|-------------------------|-----------|-----------|
|                  |                  |                | X                       | Y         | Z         |
| 1                | 6                | 0              | -2.220852               | -0.337638 | 0.710123  |
| 2                | 6                | 0              | -3.436857               | -0.995722 | 0.757701  |
| 3                | 6                | 0              | -3.592820               | -2.165246 | 0.021837  |
| 4                | 6                | 0              | -2.569423               | -2.686736 | -0.756676 |
| 5                | 6                | 0              | -1.359901               | -2.010915 | -0.799047 |
| 6                | 6                | 0              | -1.155837               | -0.834175 | -0.060782 |
| 7                | 1                | 0              | -2.088645               | 0.565862  | 1.290081  |
| 8                | 1                | 0              | -4.250206               | -0.617475 | 1.362552  |
| 9                | 1                | 0              | -2.721610               | -3.592115 | -1.329215 |
| 10               | 1                | 0              | -0.569376               | -2.394010 | -1.433688 |
| 11               | 6                | 0              | 0.155913                | -0.156755 | -0.070016 |
| 12               | 6                | 0              | 1.288688                | -0.926206 | -0.101512 |
| 13               | 6                | 0              | 0.257262                | 1.291158  | -0.020176 |
| 14               | 1                | 0              | 1.244162                | 1.703363  | 0.220438  |
| 15               | 1                | 0              | 2.723318                | 0.467756  | -0.532652 |
| 16               | 1                | 0              | 1.188616                | -2.003560 | -0.019752 |
| 17               | 7                | 0              | -0.726971               | 2.079700  | -0.246200 |
| 18               | 7                | 0              | 2.560015                | -0.488188 | -0.240612 |
| 19               | 7                | 0              | -4.878904               | -2.864937 | 0.065791  |
| 20               | 8                | 0              | -4.991054               | -3.901550 | -0.561697 |
| 21               | 8                | 0              | -5.775033               | -2.377014 | 0.728851  |
| 22               | 6                | 0              | -0.522164               | 3.464843  | -0.095304 |
| 23               | 6                | 0              | -1.147190               | 4.323321  | -1.007297 |
| 24               | 6                | 0              | 0.234817                | 4.012042  | 0.948828  |
| 25               | 6                | 0              | -0.978292               | 5.698420  | -0.906287 |
| 26               | 1                | 0              | -1.751393               | 3.893494  | -1.798898 |
| 27               | 6                | 0              | 0.389323                | 5.391145  | 1.050697  |
| 28               | 1                | 0              | 0.678238                | 3.357841  | 1.691834  |
| 29               | 6                | 0              | -0.208250               | 6.239410  | 0.122376  |
| 30               | 1                | 0              | -1.454809               | 6.351844  | -1.628700 |
| 31               | 1                | 0              | 0.972154                | 5.804202  | 1.866666  |
| 32               | 1                | 0              | -0.085945               | 7.313134  | 0.206235  |
| 33               | 6                | 0              | 3.714614                | -1.270610 | -0.074700 |
| 34               | 6                | 0              | 4.915676                | -0.785825 | -0.603858 |
| 35               | 6                | 0              | 3.700774                | -2.489767 | 0.607925  |
| 36               | 6                | 0              | 6.084556                | -1.520841 | -0.464134 |
| 37               | 1                | 0              | 4.919140                | 0.164196  | -1.128112 |
| 38               | 6                | 0              | 4.877652                | -3.222824 | 0.727320  |
| 39               | 1                | 0              | 2.792324                | -2.861925 | 1.065493  |
| 40               | 6                | 0              | 6.072739                | -2.748362 | 0.195623  |
| 41               | 1                | 0              | 7.008537                | -1.133264 | -0.878319 |
| 42               | 1                | 0              | 4.856732                | -4.167415 | 1.258969  |
| 43               | 1                | 0              | 6.985927                | -3.321747 | 0.301148  |

## Structure 30d (C<sub>2</sub>H<sub>5</sub>OH)

Energy (Hartrees): -1124.92429665

No imaginary frequencies

Standard orientation:

| Center<br>Number | Atomic<br>Number | Atomic<br>Type | Coordinates (Angstroms) |           |           |
|------------------|------------------|----------------|-------------------------|-----------|-----------|
|                  |                  |                | X                       | Y         | Z         |
| 1                | 6                | 0              | -2.222232               | -0.337238 | 0.718834  |
| 2                | 6                | 0              | -3.441249               | -0.988530 | 0.761660  |
| 3                | 6                | 0              | -3.599525               | -2.156650 | 0.022941  |
| 4                | 6                | 0              | -2.575835               | -2.683956 | -0.752353 |
| 5                | 6                | 0              | -1.364370               | -2.012747 | -0.791400 |
| 6                | 6                | 0              | -1.158081               | -0.836586 | -0.052013 |
| 7                | 1                | 0              | -2.086247               | 0.563826  | 1.301696  |
| 8                | 1                | 0              | -4.254291               | -0.607899 | 1.365729  |
| 9                | 1                | 0              | -2.730588               | -3.587150 | -1.327973 |
| 10               | 1                | 0              | -0.574892               | -2.396681 | -1.426910 |
| 11               | 6                | 0              | 0.153510                | -0.160721 | -0.061786 |
| 12               | 6                | 0              | 1.285790                | -0.930663 | -0.095539 |
| 13               | 6                | 0              | 0.256040                | 1.287485  | -0.013283 |
| 14               | 1                | 0              | 1.242189                | 1.697706  | 0.233411  |
| 15               | 1                | 0              | 2.719706                | 0.461940  | -0.533991 |
| 16               | 1                | 0              | 1.186243                | -2.007985 | -0.012757 |
| 17               | 7                | 0              | -0.724316               | 2.078008  | -0.248451 |
| 18               | 7                | 0              | 2.557023                | -0.492889 | -0.238069 |
| 19               | 7                | 0              | -4.886345               | -2.844935 | 0.058271  |
| 20               | 8                | 0              | -4.996638               | -3.901225 | -0.537852 |
| 21               | 8                | 0              | -5.798776               | -2.334939 | 0.682992  |
| 22               | 6                | 0              | -0.513492               | 3.462946  | -0.097073 |
| 23               | 6                | 0              | -1.124109               | 4.324638  | -1.015503 |
| 24               | 6                | 0              | 0.235425                | 4.006068  | 0.954695  |
| 25               | 6                | 0              | -0.947235               | 5.698674  | -0.913603 |
| 26               | 1                | 0              | -1.723920               | 3.899165  | -1.812752 |
| 27               | 6                | 0              | 0.398213                | 5.384186  | 1.057329  |
| 28               | 1                | 0              | 0.665606                | 3.349549  | 1.703583  |
| 29               | 6                | 0              | -0.183935               | 6.235532  | 0.122128  |
| 30               | 1                | 0              | -1.412519               | 6.354760  | -1.641076 |
| 31               | 1                | 0              | 0.974794                | 5.794042  | 1.879475  |
| 32               | 1                | 0              | -0.055391               | 7.308597  | 0.206314  |
| 33               | 6                | 0              | 3.711742                | -1.276980 | -0.074986 |
| 34               | 6                | 0              | 4.909554                | -0.799767 | -0.617346 |
| 35               | 6                | 0              | 3.699784                | -2.489753 | 0.618451  |
| 36               | 6                | 0              | 6.077751                | -1.536268 | -0.479884 |
| 37               | 1                | 0              | 4.911723                | 0.145548  | -1.150199 |
| 38               | 6                | 0              | 4.875567                | -3.225018 | 0.735064  |
| 39               | 1                | 0              | 2.793903                | -2.854666 | 1.087063  |
| 40               | 6                | 0              | 6.067668                | -2.758069 | 0.190319  |
| 41               | 1                | 0              | 6.999709                | -1.154406 | -0.903989 |
| 42               | 1                | 0              | 4.856521                | -4.165061 | 1.274959  |
| 43               | 1                | 0              | 6.980354                | -3.332765 | 0.294143  |

**Structure 30e (vacuum)**

Energy (Hartrees): -1124.88497700  
 No imaginary frequencies

Standard orientation:

| Center<br>Number | Atomic<br>Number | Atomic<br>Type | Coordinates (Angstroms) |           |           |
|------------------|------------------|----------------|-------------------------|-----------|-----------|
|                  |                  |                | X                       | Y         | Z         |
| 1                | 6                | 0              | 2.325764                | 0.619256  | -0.729492 |
| 2                | 6                | 0              | 3.669654                | 0.899515  | -0.553536 |
| 3                | 6                | 0              | 4.471063                | -0.040814 | 0.080693  |
| 4                | 6                | 0              | 3.966186                | -1.241909 | 0.549900  |
| 5                | 6                | 0              | 2.615562                | -1.504737 | 0.370908  |
| 6                | 6                | 0              | 1.777899                | -0.593949 | -0.286373 |
| 7                | 1                | 0              | 1.690580                | 1.344486  | -1.219047 |
| 8                | 1                | 0              | 4.104175                | 1.826738  | -0.901672 |
| 9                | 1                | 0              | 4.619736                | -1.938226 | 1.057501  |
| 10               | 1                | 0              | 2.198452                | -2.420165 | 0.773583  |
| 11               | 6                | 0              | 0.360248                | -0.928100 | -0.536934 |
| 12               | 6                | 0              | 0.038397                | -2.204581 | -0.872552 |
| 13               | 6                | 0              | -0.674216               | 0.107516  | -0.499817 |
| 14               | 1                | 0              | -1.613479               | -0.131348 | -1.010599 |
| 15               | 1                | 0              | -1.260944               | -3.602306 | -1.542896 |
| 16               | 1                | 0              | 0.842614                | -2.900472 | -1.096503 |
| 17               | 7                | 0              | -0.509374               | 1.227654  | 0.084537  |
| 18               | 7                | 0              | -1.215257               | -2.750097 | -1.006038 |
| 19               | 7                | 0              | 5.902899                | 0.252216  | 0.270790  |
| 20               | 8                | 0              | 6.579095                | -0.585171 | 0.830745  |
| 21               | 8                | 0              | 6.320081                | 1.311782  | -0.145731 |
| 22               | 6                | 0              | -1.541382               | 2.183485  | -0.002417 |
| 23               | 6                | 0              | -1.830237               | 2.936660  | 1.139024  |
| 24               | 6                | 0              | -2.246304               | 2.432169  | -1.184382 |
| 25               | 6                | 0              | -2.841690               | 3.886259  | 1.111215  |
| 26               | 1                | 0              | -1.254550               | 2.752106  | 2.038124  |
| 27               | 6                | 0              | -3.246673               | 3.397238  | -1.209644 |
| 28               | 1                | 0              | -1.986646               | 1.891317  | -2.087485 |
| 29               | 6                | 0              | -3.554818               | 4.120367  | -0.062394 |
| 30               | 1                | 0              | -3.068945               | 4.454716  | 2.005505  |
| 31               | 1                | 0              | -3.780139               | 3.591094  | -2.132898 |
| 32               | 1                | 0              | -4.334406               | 4.872090  | -0.086293 |
| 33               | 6                | 0              | -2.386951               | -2.462367 | -0.266875 |
| 34               | 6                | 0              | -3.619980               | -2.801655 | -0.823582 |
| 35               | 6                | 0              | -2.337152               | -1.897138 | 1.009422  |
| 36               | 6                | 0              | -4.792731               | -2.575550 | -0.113427 |
| 37               | 1                | 0              | -3.656117               | -3.232016 | -1.818668 |
| 38               | 6                | 0              | -3.516964               | -1.658637 | 1.701350  |
| 39               | 1                | 0              | -1.383565               | -1.643612 | 1.455493  |
| 40               | 6                | 0              | -4.749425               | -1.994082 | 1.148286  |
| 41               | 1                | 0              | -5.743712               | -2.843681 | -0.557997 |
| 42               | 1                | 0              | -3.467606               | -1.212862 | 2.687696  |
| 43               | 1                | 0              | -5.664237               | -1.802838 | 1.694780  |



## Structure 30e (CHCl<sub>3</sub>)

Energy (Hartrees): -1124.92005343

No imaginary frequencies

Standard orientation:

| Center<br>Number | Atomic<br>Number | Atomic<br>Type | Coordinates (Angstroms) |           |           |
|------------------|------------------|----------------|-------------------------|-----------|-----------|
|                  |                  |                | X                       | Y         | Z         |
| 1                | 6                | 0              | 2.328788                | 0.616187  | -0.726787 |
| 2                | 6                | 0              | 3.669863                | 0.914268  | -0.564554 |
| 3                | 6                | 0              | 4.488650                | -0.013399 | 0.070086  |
| 4                | 6                | 0              | 4.001088                | -1.220566 | 0.547923  |
| 5                | 6                | 0              | 2.653329                | -1.500658 | 0.382137  |
| 6                | 6                | 0              | 1.796034                | -0.601539 | -0.270333 |
| 7                | 1                | 0              | 1.686429                | 1.330546  | -1.224342 |
| 8                | 1                | 0              | 4.081810                | 1.846664  | -0.927328 |
| 9                | 1                | 0              | 4.659841                | -1.913664 | 1.054016  |
| 10               | 1                | 0              | 2.255059                | -2.423141 | 0.787933  |
| 11               | 6                | 0              | 0.379073                | -0.948148 | -0.498313 |
| 12               | 6                | 0              | 0.061385                | -2.240362 | -0.802178 |
| 13               | 6                | 0              | -0.657958               | 0.079669  | -0.473685 |
| 14               | 1                | 0              | -1.587187               | -0.161025 | -0.999548 |
| 15               | 1                | 0              | -1.203038               | -3.690163 | -1.399855 |
| 16               | 1                | 0              | 0.866895                | -2.934250 | -1.026480 |
| 17               | 7                | 0              | -0.516306               | 1.204071  | 0.115932  |
| 18               | 7                | 0              | -1.174399               | -2.807181 | -0.908187 |
| 19               | 7                | 0              | 5.910404                | 0.297080  | 0.247871  |
| 20               | 8                | 0              | 6.609175                | -0.521712 | 0.813420  |
| 21               | 8                | 0              | 6.322903                | 1.357170  | -0.180397 |
| 22               | 6                | 0              | -1.560020               | 2.146298  | 0.009765  |
| 23               | 6                | 0              | -1.880096               | 2.900150  | 1.144061  |
| 24               | 6                | 0              | -2.251653               | 2.379483  | -1.184468 |
| 25               | 6                | 0              | -2.905797               | 3.835240  | 1.095734  |
| 26               | 1                | 0              | -1.322231               | 2.729008  | 2.057966  |
| 27               | 6                | 0              | -3.268057               | 3.328125  | -1.229178 |
| 28               | 1                | 0              | -1.974091               | 1.835807  | -2.080890 |
| 29               | 6                | 0              | -3.604684               | 4.053851  | -0.090209 |
| 30               | 1                | 0              | -3.155458               | 4.403578  | 1.984783  |
| 31               | 1                | 0              | -3.791744               | 3.506554  | -2.161722 |
| 32               | 1                | 0              | -4.396281               | 4.793108  | -0.129468 |
| 33               | 6                | 0              | -2.372147               | -2.469037 | -0.232827 |
| 34               | 6                | 0              | -3.588500               | -2.778607 | -0.841100 |
| 35               | 6                | 0              | -2.358617               | -1.886932 | 1.037564  |
| 36               | 6                | 0              | -4.784187               | -2.499575 | -0.187568 |
| 37               | 1                | 0              | -3.591065               | -3.230590 | -1.827398 |
| 38               | 6                | 0              | -3.559009               | -1.598460 | 1.673763  |
| 39               | 1                | 0              | -1.416052               | -1.661447 | 1.522568  |
| 40               | 6                | 0              | -4.776791               | -1.898808 | 1.066791  |
| 41               | 1                | 0              | -5.723535               | -2.742677 | -0.670908 |
| 42               | 1                | 0              | -3.539672               | -1.142726 | 2.657130  |
| 43               | 1                | 0              | -5.708365               | -1.670117 | 1.570294  |

## Structure 30e (DMSO)

Energy (Hartrees): -1124.91640249

No imaginary frequencies

Standard orientation:

| Center<br>Number | Atomic<br>Number | Atomic<br>Type | Coordinates (Angstroms) |           |           |
|------------------|------------------|----------------|-------------------------|-----------|-----------|
|                  |                  |                | X                       | Y         | Z         |
| 1                | 6                | 0              | 2.321007                | 0.632880  | -0.697288 |
| 2                | 6                | 0              | 3.660013                | 0.940156  | -0.536730 |
| 3                | 6                | 0              | 4.492819                | 0.005224  | 0.069777  |
| 4                | 6                | 0              | 4.019249                | -1.219144 | 0.519345  |
| 5                | 6                | 0              | 2.672831                | -1.507310 | 0.359689  |
| 6                | 6                | 0              | 1.800998                | -0.599671 | -0.263292 |
| 7                | 1                | 0              | 1.671348                | 1.349841  | -1.182028 |
| 8                | 1                | 0              | 4.058164                | 1.884081  | -0.884965 |
| 9                | 1                | 0              | 4.685441                | -1.922792 | 1.000603  |
| 10               | 1                | 0              | 2.288663                | -2.444997 | 0.743674  |
| 11               | 6                | 0              | 0.386838                | -0.952283 | -0.486388 |
| 12               | 6                | 0              | 0.074380                | -2.248827 | -0.793050 |
| 13               | 6                | 0              | -0.655184               | 0.066453  | -0.464923 |
| 14               | 1                | 0              | -1.574737               | -0.175869 | -1.006349 |
| 15               | 1                | 0              | -1.184300               | -3.705281 | -1.377214 |
| 16               | 1                | 0              | 0.880157                | -2.938038 | -1.029642 |
| 17               | 7                | 0              | -0.533575               | 1.189634  | 0.136009  |
| 18               | 7                | 0              | -1.154486               | -2.820486 | -0.885831 |
| 19               | 7                | 0              | 5.911637                | 0.323684  | 0.241650  |
| 20               | 8                | 0              | 6.632777                | -0.517500 | 0.745114  |
| 21               | 8                | 0              | 6.304200                | 1.414100  | -0.129404 |
| 22               | 6                | 0              | -1.582652               | 2.124146  | 0.014583  |
| 23               | 6                | 0              | -1.915116               | 2.886315  | 1.140578  |
| 24               | 6                | 0              | -2.267387               | 2.345025  | -1.186942 |
| 25               | 6                | 0              | -2.942127               | 3.820046  | 1.077390  |
| 26               | 1                | 0              | -1.366734               | 2.725191  | 2.062370  |
| 27               | 6                | 0              | -3.286398               | 3.290724  | -1.245702 |
| 28               | 1                | 0              | -1.982942               | 1.795811  | -2.077959 |
| 29               | 6                | 0              | -3.633542               | 4.026089  | -0.115459 |
| 30               | 1                | 0              | -3.199565               | 4.394338  | 1.960508  |
| 31               | 1                | 0              | -3.804198               | 3.459181  | -2.183527 |
| 32               | 1                | 0              | -4.426909               | 4.762822  | -0.167162 |
| 33               | 6                | 0              | -2.354528               | -2.471146 | -0.221613 |
| 34               | 6                | 0              | -3.568488               | -2.770033 | -0.839850 |
| 35               | 6                | 0              | -2.344903               | -1.892438 | 1.050912  |
| 36               | 6                | 0              | -4.766779               | -2.476330 | -0.196897 |
| 37               | 1                | 0              | -3.566003               | -3.225671 | -1.824287 |
| 38               | 6                | 0              | -3.547567               | -1.591238 | 1.677496  |
| 39               | 1                | 0              | -1.403432               | -1.682615 | 1.545499  |
| 40               | 6                | 0              | -4.763728               | -1.876462 | 1.058510  |
| 41               | 1                | 0              | -5.704690               | -2.710581 | -0.687633 |
| 42               | 1                | 0              | -3.532174               | -1.141959 | 2.664147  |
| 43               | 1                | 0              | -5.697355               | -1.639135 | 1.554619  |

## Structure 30e (C<sub>2</sub>H<sub>5</sub>OH)

Energy (Hartrees): -1124.91857659

No imaginary frequencies

Standard orientation:

| Center<br>Number | Atomic<br>Number | Atomic<br>Type | Coordinates (Angstroms) |           |           |
|------------------|------------------|----------------|-------------------------|-----------|-----------|
|                  |                  |                | X                       | Y         | Z         |
| 1                | 6                | 0              | 2.325246                | 0.622719  | -0.723423 |
| 2                | 6                | 0              | 3.663402                | 0.931061  | -0.563186 |
| 3                | 6                | 0              | 4.491182                | 0.005552  | 0.065533  |
| 4                | 6                | 0              | 4.015694                | -1.212712 | 0.531222  |
| 5                | 6                | 0              | 2.671341                | -1.503768 | 0.365038  |
| 6                | 6                | 0              | 1.802805                | -0.603340 | -0.273267 |
| 7                | 1                | 0              | 1.677384                | 1.333452  | -1.219761 |
| 8                | 1                | 0              | 4.063541                | 1.870109  | -0.922648 |
| 9                | 1                | 0              | 4.678927                | -1.910430 | 1.025357  |
| 10               | 1                | 0              | 2.284843                | -2.436971 | 0.757673  |
| 11               | 6                | 0              | 0.388893                | -0.956095 | -0.493564 |
| 12               | 6                | 0              | 0.076528                | -2.254641 | -0.791193 |
| 13               | 6                | 0              | -0.652572               | 0.063811  | -0.470755 |
| 14               | 1                | 0              | -1.572446               | -0.176790 | -1.012262 |
| 15               | 1                | 0              | -1.181830               | -3.717410 | -1.362880 |
| 16               | 1                | 0              | 0.882432                | -2.944891 | -1.024563 |
| 17               | 7                | 0              | -0.530068               | 1.184539  | 0.134318  |
| 18               | 7                | 0              | -1.151842               | -2.828089 | -0.880005 |
| 19               | 7                | 0              | 5.902851                | 0.327915  | 0.246118  |
| 20               | 8                | 0              | 6.599730                | -0.448949 | 0.874110  |
| 21               | 8                | 0              | 6.328595                | 1.360680  | -0.238848 |
| 22               | 6                | 0              | -1.581457               | 2.117861  | 0.018016  |
| 23               | 6                | 0              | -1.915037               | 2.873644  | 1.147694  |
| 24               | 6                | 0              | -2.266554               | 2.343562  | -1.182112 |
| 25               | 6                | 0              | -2.944723               | 3.804710  | 1.089691  |
| 26               | 1                | 0              | -1.365646               | 2.709990  | 2.068519  |
| 27               | 6                | 0              | -3.288299               | 3.286563  | -1.235890 |
| 28               | 1                | 0              | -1.980030               | 1.800481  | -2.076317 |
| 29               | 6                | 0              | -3.637300               | 4.014855  | -0.101694 |
| 30               | 1                | 0              | -3.203012               | 4.374219  | 1.975783  |
| 31               | 1                | 0              | -3.806818               | 3.458563  | -2.172785 |
| 32               | 1                | 0              | -4.432771               | 4.749778  | -0.149138 |
| 33               | 6                | 0              | -2.353146               | -2.468607 | -0.221820 |
| 34               | 6                | 0              | -3.566719               | -2.758815 | -0.844354 |
| 35               | 6                | 0              | -2.343434               | -1.890437 | 1.050705  |
| 36               | 6                | 0              | -4.765125               | -2.456588 | -0.205440 |
| 37               | 1                | 0              | -3.564676               | -3.213956 | -1.829129 |
| 38               | 6                | 0              | -3.545876               | -1.580278 | 1.673183  |
| 39               | 1                | 0              | -1.401826               | -1.687170 | 1.548157  |
| 40               | 6                | 0              | -4.761851               | -1.856767 | 1.049885  |
| 41               | 1                | 0              | -5.703162               | -2.683746 | -0.699504 |
| 42               | 1                | 0              | -3.530665               | -1.130721 | 2.659785  |
| 43               | 1                | 0              | -5.695425               | -1.612658 | 1.543007  |

## Structure 30f (vacuum)

Energy (Hartrees): -1124.88052872

No imaginary frequencies

Standard orientation:

| Center<br>Number | Atomic<br>Number | Atomic<br>Type | Coordinates (Angstroms) |           |           |
|------------------|------------------|----------------|-------------------------|-----------|-----------|
|                  |                  |                | X                       | Y         | Z         |
| 1                | 6                | 0              | -2.532078               | 0.451685  | 0.856881  |
| 2                | 6                | 0              | -3.878312               | 0.754584  | 0.988802  |
| 3                | 6                | 0              | -4.771499               | 0.220158  | 0.072368  |
| 4                | 6                | 0              | -4.356321               | -0.594051 | -0.970734 |
| 5                | 6                | 0              | -3.005450               | -0.876713 | -1.092991 |
| 6                | 6                | 0              | -2.069802               | -0.373268 | -0.177725 |
| 7                | 1                | 0              | -1.831465               | 0.841359  | 1.586062  |
| 8                | 1                | 0              | -4.244330               | 1.381065  | 1.790969  |
| 9                | 1                | 0              | -5.083753               | -0.975141 | -1.674946 |
| 10               | 1                | 0              | -2.665022               | -1.477037 | -1.928549 |
| 11               | 6                | 0              | -0.625112               | -0.695068 | -0.300794 |
| 12               | 6                | 0              | -0.288475               | -1.991588 | -0.558715 |
| 13               | 6                | 0              | 0.313749                | 0.419221  | -0.212003 |
| 14               | 1                | 0              | -1.109097               | -2.679137 | -0.745589 |
| 15               | 1                | 0              | -0.071679               | 1.352287  | 0.218695  |
| 16               | 1                | 0              | 0.899430                | -3.549924 | -0.991030 |
| 17               | 7                | 0              | 1.499952                | 0.351535  | -0.675217 |
| 18               | 7                | 0              | 0.921835                | -2.614398 | -0.615679 |
| 19               | 7                | 0              | -6.205121               | 0.529878  | 0.209128  |
| 20               | 8                | 0              | -6.963252               | 0.055856  | -0.610259 |
| 21               | 8                | 0              | -6.540643               | 1.239066  | 1.133873  |
| 22               | 6                | 0              | 2.374546                | 1.434728  | -0.498045 |
| 23               | 6                | 0              | 3.235881                | 1.766194  | -1.548292 |
| 24               | 6                | 0              | 2.460016                | 2.143356  | 0.705368  |
| 25               | 6                | 0              | 4.126535                | 2.821284  | -1.415112 |
| 26               | 1                | 0              | 3.181762                | 1.186897  | -2.462258 |
| 27               | 6                | 0              | 3.365421                | 3.190640  | 0.837216  |
| 28               | 1                | 0              | 1.839937                | 1.846311  | 1.544314  |
| 29               | 6                | 0              | 4.195016                | 3.539496  | -0.222690 |
| 30               | 1                | 0              | 4.778277                | 3.080279  | -2.241353 |
| 31               | 1                | 0              | 3.429391                | 3.728518  | 1.776117  |
| 32               | 1                | 0              | 4.901168                | 4.353998  | -0.116551 |
| 33               | 6                | 0              | 2.136309                | -2.274653 | 0.029059  |
| 34               | 6                | 0              | 3.338802                | -2.599725 | -0.591971 |
| 35               | 6                | 0              | 2.141387                | -1.671335 | 1.284226  |
| 36               | 6                | 0              | 4.543498                | -2.298480 | 0.030840  |
| 37               | 1                | 0              | 3.324328                | -3.058522 | -1.574388 |
| 38               | 6                | 0              | 3.349103                | -1.361757 | 1.894634  |
| 39               | 1                | 0              | 1.200032                | -1.437101 | 1.767803  |
| 40               | 6                | 0              | 4.554666                | -1.668477 | 1.270657  |
| 41               | 1                | 0              | 5.475929                | -2.542481 | -0.463924 |
| 42               | 1                | 0              | 3.348132                | -0.878713 | 2.864704  |
| 43               | 1                | 0              | 5.494171                | -1.418526 | 1.747522  |

## Structure 30f (CHCl<sub>3</sub>)

Energy (Hartrees): -1124.91564468

No imaginary frequencies

Standard orientation:

| Center<br>Number | Atomic<br>Number | Atomic<br>Type | Coordinates (Angstroms) |           |           |
|------------------|------------------|----------------|-------------------------|-----------|-----------|
|                  |                  |                | X                       | Y         | Z         |
| 1                | 6                | 0              | -2.515967               | 0.450708  | 0.852987  |
| 2                | 6                | 0              | -3.864485               | 0.735865  | 0.994860  |
| 3                | 6                | 0              | -4.759022               | 0.187977  | 0.085393  |
| 4                | 6                | 0              | -4.340061               | -0.622917 | -0.961325 |
| 5                | 6                | 0              | -2.987881               | -0.889498 | -1.092522 |
| 6                | 6                | 0              | -2.050304               | -0.371198 | -0.184834 |
| 7                | 1                | 0              | -1.818211               | 0.854367  | 1.577364  |
| 8                | 1                | 0              | -4.222361               | 1.359811  | 1.803077  |
| 9                | 1                | 0              | -5.059791               | -1.018796 | -1.665661 |
| 10               | 1                | 0              | -2.652373               | -1.490313 | -1.929559 |
| 11               | 6                | 0              | -0.602459               | -0.675173 | -0.316908 |
| 12               | 6                | 0              | -0.255542               | -1.961513 | -0.628846 |
| 13               | 6                | 0              | 0.319793                | 0.446050  | -0.197212 |
| 14               | 1                | 0              | -1.066178               | -2.643343 | -0.869358 |
| 15               | 1                | 0              | -0.078855               | 1.361855  | 0.254818  |
| 16               | 1                | 0              | 0.927890                | -3.495242 | -1.121255 |
| 17               | 7                | 0              | 1.508035                | 0.415053  | -0.667955 |
| 18               | 7                | 0              | 0.951181                | -2.581029 | -0.689574 |
| 19               | 7                | 0              | -6.188227               | 0.478273  | 0.231695  |
| 20               | 8                | 0              | -6.956609               | -0.007694 | -0.575197 |
| 21               | 8                | 0              | -6.535724               | 1.190291  | 1.153603  |
| 22               | 6                | 0              | 2.347931                | 1.526328  | -0.483909 |
| 23               | 6                | 0              | 3.179503                | 1.906196  | -1.543632 |
| 24               | 6                | 0              | 2.427613                | 2.220491  | 0.729437  |
| 25               | 6                | 0              | 4.037380                | 2.989051  | -1.407947 |
| 26               | 1                | 0              | 3.131575                | 1.343099  | -2.468922 |
| 27               | 6                | 0              | 3.300502                | 3.296116  | 0.862902  |
| 28               | 1                | 0              | 1.826875                | 1.896424  | 1.572789  |
| 29               | 6                | 0              | 4.101938                | 3.690054  | -0.204335 |
| 30               | 1                | 0              | 4.666036                | 3.282095  | -2.241333 |
| 31               | 1                | 0              | 3.361206                | 3.821545  | 1.809610  |
| 32               | 1                | 0              | 4.783086                | 4.525902  | -0.095961 |
| 33               | 6                | 0              | 2.158587                | -2.296991 | -0.014669 |
| 34               | 6                | 0              | 3.353276                | -2.742453 | -0.580543 |
| 35               | 6                | 0              | 2.173900                | -1.651894 | 1.221262  |
| 36               | 6                | 0              | 4.557643                | -2.520670 | 0.076177  |
| 37               | 1                | 0              | 3.332107                | -3.247319 | -1.540702 |
| 38               | 6                | 0              | 3.383376                | -1.429241 | 1.867978  |
| 39               | 1                | 0              | 1.243248                | -1.329935 | 1.673259  |
| 40               | 6                | 0              | 4.580331                | -1.855624 | 1.299040  |
| 41               | 1                | 0              | 5.481970                | -2.863347 | -0.374800 |
| 42               | 1                | 0              | 3.388233                | -0.919579 | 2.824890  |
| 43               | 1                | 0              | 5.520981                | -1.674074 | 1.805204  |

## Structure 30f (DMSO)

Energy (Hartrees): -1124.91315682

No imaginary frequencies

Standard orientation:

| Center<br>Number | Atomic<br>Number | Atomic<br>Type | Coordinates (Angstroms) |           |           |
|------------------|------------------|----------------|-------------------------|-----------|-----------|
|                  |                  |                | X                       | Y         | Z         |
| 1                | 6                | 0              | -2.515757               | 0.476418  | 0.836189  |
| 2                | 6                | 0              | -3.862621               | 0.768880  | 0.976804  |
| 3                | 6                | 0              | -4.763658               | 0.202045  | 0.084808  |
| 4                | 6                | 0              | -4.351632               | -0.637531 | -0.942615 |
| 5                | 6                | 0              | -3.001194               | -0.912243 | -1.073389 |
| 6                | 6                | 0              | -2.057605               | -0.372116 | -0.184043 |
| 7                | 1                | 0              | -1.815349               | 0.894976  | 1.549340  |
| 8                | 1                | 0              | -4.210806               | 1.413410  | 1.773039  |
| 9                | 1                | 0              | -5.072419               | -1.051638 | -1.635420 |
| 10               | 1                | 0              | -2.674353               | -1.540210 | -1.893810 |
| 11               | 6                | 0              | -0.611598               | -0.681692 | -0.316799 |
| 12               | 6                | 0              | -0.268099               | -1.974813 | -0.611495 |
| 13               | 6                | 0              | 0.315742                | 0.434304  | -0.205931 |
| 14               | 1                | 0              | -1.076628               | -2.659655 | -0.849643 |
| 15               | 1                | 0              | -0.061531               | 1.343902  | 0.274510  |
| 16               | 1                | 0              | 0.916413                | -3.518281 | -1.071011 |
| 17               | 7                | 0              | 1.492587                | 0.404480  | -0.710049 |
| 18               | 7                | 0              | 0.936613                | -2.596181 | -0.652835 |
| 19               | 7                | 0              | -6.189543               | 0.501074  | 0.229909  |
| 20               | 8                | 0              | -6.966421               | -0.008570 | -0.555812 |
| 21               | 8                | 0              | -6.531032               | 1.244918  | 1.130351  |
| 22               | 6                | 0              | 2.351126                | 1.499076  | -0.512648 |
| 23               | 6                | 0              | 3.182813                | 1.886197  | -1.570649 |
| 24               | 6                | 0              | 2.454782                | 2.164355  | 0.716075  |
| 25               | 6                | 0              | 4.064291                | 2.948522  | -1.417552 |
| 26               | 1                | 0              | 3.117023                | 1.349024  | -2.510666 |
| 27               | 6                | 0              | 3.349515                | 3.220250  | 0.865429  |
| 28               | 1                | 0              | 1.851918                | 1.835441  | 1.556217  |
| 29               | 6                | 0              | 4.151990                | 3.621483  | -0.199155 |
| 30               | 1                | 0              | 4.692391                | 3.247310  | -2.249502 |
| 31               | 1                | 0              | 3.426866                | 3.723499  | 1.823044  |
| 32               | 1                | 0              | 4.850568                | 4.441112  | -0.077612 |
| 33               | 6                | 0              | 2.143253                | -2.290437 | 0.010931  |
| 34               | 6                | 0              | 3.339043                | -2.738822 | -0.552440 |
| 35               | 6                | 0              | 2.161252                | -1.614067 | 1.231039  |
| 36               | 6                | 0              | 4.546757                | -2.482811 | 0.086638  |
| 37               | 1                | 0              | 3.314478                | -3.276341 | -1.494663 |
| 38               | 6                | 0              | 3.373815                | -1.358088 | 1.860348  |
| 39               | 1                | 0              | 1.231609                | -1.290667 | 1.684533  |
| 40               | 6                | 0              | 4.572155                | -1.782174 | 1.290308  |
| 41               | 1                | 0              | 5.471128                | -2.828727 | -0.362154 |
| 42               | 1                | 0              | 3.379415                | -0.823983 | 2.804062  |
| 43               | 1                | 0              | 5.515086                | -1.575979 | 1.783129  |

## Structure 30f (C<sub>2</sub>H<sub>5</sub>OH)

Energy (Hartrees): -1124.91485130

No imaginary frequencies

Standard orientation:

| Center<br>Number | Atomic<br>Number | Atomic<br>Type | Coordinates (Angstroms) |           |           |
|------------------|------------------|----------------|-------------------------|-----------|-----------|
|                  |                  |                | X                       | Y         | Z         |
| 1                | 6                | 0              | -2.517491               | 0.475963  | 0.843922  |
| 2                | 6                | 0              | -3.863552               | 0.771924  | 0.978886  |
| 3                | 6                | 0              | -4.762401               | 0.204450  | 0.084041  |
| 4                | 6                | 0              | -4.348926               | -0.639574 | -0.940004 |
| 5                | 6                | 0              | -2.999316               | -0.916988 | -1.064610 |
| 6                | 6                | 0              | -2.057307               | -0.376335 | -0.173081 |
| 7                | 1                | 0              | -1.818999               | 0.894085  | 1.559210  |
| 8                | 1                | 0              | -4.213132               | 1.419134  | 1.772543  |
| 9                | 1                | 0              | -5.066869               | -1.053363 | -1.635920 |
| 10               | 1                | 0              | -2.670286               | -1.545320 | -1.883849 |
| 11               | 6                | 0              | -0.612722               | -0.688578 | -0.303590 |
| 12               | 6                | 0              | -0.272464               | -1.983020 | -0.596680 |
| 13               | 6                | 0              | 0.317189                | 0.425977  | -0.193761 |
| 14               | 1                | 0              | -1.083009               | -2.667180 | -0.830081 |
| 15               | 1                | 0              | -0.053541               | 1.331887  | 0.298526  |
| 16               | 1                | 0              | 0.907878                | -3.532842 | -1.048646 |
| 17               | 7                | 0              | 1.486654                | 0.400464  | -0.714694 |
| 18               | 7                | 0              | 0.930213                | -2.607557 | -0.638129 |
| 19               | 7                | 0              | -6.183016               | 0.508154  | 0.220558  |
| 20               | 8                | 0              | -6.964370               | -0.010790 | -0.556166 |
| 21               | 8                | 0              | -6.531177               | 1.267767  | 1.106534  |
| 22               | 6                | 0              | 2.348611                | 1.492574  | -0.514588 |
| 23               | 6                | 0              | 3.171921                | 1.887971  | -1.575826 |
| 24               | 6                | 0              | 2.463165                | 2.147603  | 0.718550  |
| 25               | 6                | 0              | 4.055411                | 2.948378  | -1.421262 |
| 26               | 1                | 0              | 3.098534                | 1.358830  | -2.519874 |
| 27               | 6                | 0              | 3.359806                | 3.201583  | 0.869493  |
| 28               | 1                | 0              | 1.868280                | 1.811864  | 1.561743  |
| 29               | 6                | 0              | 4.153655                | 3.611288  | -0.198247 |
| 30               | 1                | 0              | 4.677213                | 3.253229  | -2.255893 |
| 31               | 1                | 0              | 3.445791                | 3.696454  | 1.830887  |
| 32               | 1                | 0              | 4.854123                | 4.429283  | -0.075597 |
| 33               | 6                | 0              | 2.142002                | -2.291792 | 0.014145  |
| 34               | 6                | 0              | 3.337493                | -2.717849 | -0.565404 |
| 35               | 6                | 0              | 2.162008                | -1.626114 | 1.239671  |
| 36               | 6                | 0              | 4.547870                | -2.450102 | 0.064093  |
| 37               | 1                | 0              | 3.311812                | -3.246352 | -1.512753 |
| 38               | 6                | 0              | 3.376752                | -1.357501 | 1.859062  |
| 39               | 1                | 0              | 1.231720                | -1.321161 | 1.705102  |
| 40               | 6                | 0              | 4.575089                | -1.759576 | 1.273320  |
| 41               | 1                | 0              | 5.472666                | -2.778058 | -0.397374 |
| 42               | 1                | 0              | 3.384597                | -0.831614 | 2.807479  |
| 43               | 1                | 0              | 5.519894                | -1.543801 | 1.758622  |

### Structure 31a (vacuum)

Energy (Hartrees): -517.564821965  
No imaginary frequencies

Standard orientation:

| Center<br>Number | Atomic<br>Number | Atomic<br>Type | Coordinates (Angstroms) |           |           |
|------------------|------------------|----------------|-------------------------|-----------|-----------|
|                  |                  |                | X                       | Y         | Z         |
| 1                | 6                | 0              | 3.118577                | 0.688634  | 0.659265  |
| 2                | 6                | 0              | 1.756707                | 0.959387  | 0.602519  |
| 3                | 6                | 0              | 0.873571                | 0.081580  | -0.038303 |
| 4                | 6                | 0              | 1.403087                | -1.076822 | -0.619258 |
| 5                | 6                | 0              | 2.762192                | -1.358858 | -0.544939 |
| 6                | 6                | 0              | 3.627645                | -0.474651 | 0.090749  |
| 7                | 1                | 0              | 3.782653                | 1.382084  | 1.162144  |
| 8                | 1                | 0              | 1.367266                | 1.850680  | 1.082305  |
| 9                | 1                | 0              | 0.743615                | -1.749236 | -1.157914 |
| 10               | 1                | 0              | 3.149049                | -2.262760 | -1.001293 |
| 11               | 1                | 0              | 4.688524                | -0.688372 | 0.140021  |
| 12               | 6                | 0              | -0.574530               | 0.377365  | -0.095687 |
| 13               | 6                | 0              | -1.496677               | -0.616808 | 0.144331  |
| 14               | 1                | 0              | -1.141182               | -1.611460 | 0.408301  |
| 15               | 6                | 0              | -1.027857               | 1.713324  | -0.403851 |
| 16               | 1                | 0              | -0.233711               | 2.454472  | -0.604819 |
| 17               | 1                | 0              | -3.163914               | 0.448746  | -0.119036 |
| 18               | 7                | 0              | -2.823405               | -0.484903 | 0.098863  |
| 19               | 6                | 0              | -3.749970               | -1.536857 | 0.458878  |
| 20               | 1                | 0              | -4.508914               | -1.657599 | -0.315801 |
| 21               | 1                | 0              | -3.206361               | -2.476798 | 0.558533  |
| 22               | 1                | 0              | -4.247650               | -1.320644 | 1.407696  |
| 23               | 8                | 0              | -2.202750               | 2.060930  | -0.471800 |

### Structure 31a (CHCl<sub>3</sub>)

Energy (Hartrees): -517.582821953  
No imaginary frequencies

Standard orientation:

| Center<br>Number | Atomic<br>Number | Atomic<br>Type | Coordinates (Angstroms) |           |           |
|------------------|------------------|----------------|-------------------------|-----------|-----------|
|                  |                  |                | X                       | Y         | Z         |
| 1                | 6                | 0              | 3.132541                | 0.699316  | 0.611454  |
| 2                | 6                | 0              | 1.770201                | 0.975512  | 0.566599  |
| 3                | 6                | 0              | 0.871065                | 0.080608  | -0.030476 |
| 4                | 6                | 0              | 1.387031                | -1.103436 | -0.575255 |
| 5                | 6                | 0              | 2.746470                | -1.389920 | -0.510860 |
| 6                | 6                | 0              | 3.627905                | -0.487251 | 0.078016  |
| 7                | 1                | 0              | 3.807890                | 1.408335  | 1.077458  |
| 8                | 1                | 0              | 1.395357                | 1.887647  | 1.018867  |
| 9                | 1                | 0              | 0.718452                | -1.797108 | -1.074699 |
| 10               | 1                | 0              | 3.120901                | -2.313816 | -0.938063 |
| 11               | 1                | 0              | 4.688824                | -0.705317 | 0.118509  |
| 12               | 6                | 0              | -0.576035               | 0.388323  | -0.084019 |
| 13               | 6                | 0              | -1.507280               | -0.610223 | 0.153867  |
| 14               | 1                | 0              | -1.156189               | -1.609668 | 0.403659  |
| 15               | 6                | 0              | -1.012275               | 1.719701  | -0.393119 |
| 16               | 1                | 0              | -0.214232               | 2.449649  | -0.614010 |
| 17               | 1                | 0              | -3.182006               | 0.451350  | -0.093925 |
| 18               | 7                | 0              | -2.825934               | -0.474841 | 0.127386  |
| 19               | 6                | 0              | -3.757203               | -1.550902 | 0.409054  |
| 20               | 1                | 0              | -4.381086               | -1.755147 | -0.463374 |
| 21               | 1                | 0              | -3.199014               | -2.451489 | 0.664037  |
| 22               | 1                | 0              | -4.400783               | -1.285542 | 1.249887  |
| 23               | 8                | 0              | -2.188887               | 2.089328  | -0.448953 |



### Structure 31a (DMSO)

Energy (Hartrees): -517.581584171  
No imaginary frequencies

Standard orientation:

| Center Number | Atomic Number | Atomic Type | Coordinates (Angstroms) |           |           |
|---------------|---------------|-------------|-------------------------|-----------|-----------|
|               |               |             | X                       | Y         | Z         |
| 1             | 6             | 0           | 3.148422                | 0.716798  | 0.546416  |
| 2             | 6             | 0           | 1.786214                | 0.998169  | 0.514147  |
| 3             | 6             | 0           | 0.869702                | 0.080063  | -0.021266 |
| 4             | 6             | 0           | 1.371377                | -1.133525 | -0.515356 |
| 5             | 6             | 0           | 2.730604                | -1.423723 | -0.461977 |
| 6             | 6             | 0           | 3.628877                | -0.497715 | 0.063459  |
| 7             | 1             | 0           | 3.835435                | 1.444553  | 0.964604  |
| 8             | 1             | 0           | 1.426918                | 1.934552  | 0.928063  |
| 9             | 1             | 0           | 0.691844                | -1.851885 | -0.962195 |
| 10            | 1             | 0           | 3.091239                | -2.370794 | -0.848771 |
| 11            | 1             | 0           | 4.689474                | -0.719549 | 0.094613  |
| 12            | 6             | 0           | -0.576054               | 0.393330  | -0.066644 |
| 13            | 6             | 0           | -1.511970               | -0.609326 | 0.154333  |
| 14            | 1             | 0           | -1.166494               | -1.614644 | 0.386991  |
| 15            | 6             | 0           | -1.006073               | 1.727701  | -0.366506 |
| 16            | 1             | 0           | -0.204544               | 2.452625  | -0.590286 |
| 17            | 1             | 0           | -3.185916               | 0.458367  | -0.080986 |
| 18            | 7             | 0           | -2.827541               | -0.470085 | 0.125731  |
| 19            | 6             | 0           | -3.764144               | -1.553493 | 0.364821  |
| 20            | 1             | 0           | -4.373869               | -1.729390 | -0.523412 |
| 21            | 1             | 0           | -3.209797               | -2.460700 | 0.603218  |
| 22            | 1             | 0           | -4.420123               | -1.306400 | 1.201306  |
| 23            | 8             | 0           | -2.180389               | 2.108024  | -0.415229 |

### Structure 31a (C<sub>2</sub>H<sub>5</sub>OH)

Energy (Hartrees): -517.584239656  
No imaginary frequencies

Standard orientation:

| Center Number | Atomic Number | Atomic Type | Coordinates (Angstroms) |           |           |
|---------------|---------------|-------------|-------------------------|-----------|-----------|
|               |               |             | X                       | Y         | Z         |
| 1             | 6             | 0           | 3.140965                | 0.702757  | 0.582743  |
| 2             | 6             | 0           | 1.779164                | 0.985420  | 0.545442  |
| 3             | 6             | 0           | 0.869543                | 0.083225  | -0.025458 |
| 4             | 6             | 0           | 1.373720                | -1.116107 | -0.548823 |
| 5             | 6             | 0           | 2.732571                | -1.408070 | -0.491396 |
| 6             | 6             | 0           | 3.625150                | -0.497495 | 0.069046  |
| 7             | 1             | 0           | 3.824470                | 1.417775  | 1.027852  |
| 8             | 1             | 0           | 1.414476                | 1.909216  | 0.982612  |
| 9             | 1             | 0           | 0.697541                | -1.820481 | -1.022591 |
| 10            | 1             | 0           | 3.097349                | -2.343838 | -0.901332 |
| 11            | 1             | 0           | 4.685491                | -0.720657 | 0.103834  |
| 12            | 6             | 0           | -0.576850               | 0.398339  | -0.076409 |
| 13            | 6             | 0           | -1.511984               | -0.606480 | 0.155112  |
| 14            | 1             | 0           | -1.159768               | -1.606708 | 0.399197  |
| 15            | 6             | 0           | -1.001734               | 1.725209  | -0.379896 |
| 16            | 1             | 0           | -0.202804               | 2.451999  | -0.600448 |
| 17            | 1             | 0           | -3.193012               | 0.446784  | -0.093894 |
| 18            | 7             | 0           | -2.825929               | -0.475381 | 0.124844  |
| 19            | 6             | 0           | -3.755484               | -1.560146 | 0.389969  |
| 20            | 1             | 0           | -4.371401               | -1.752803 | -0.490258 |
| 21            | 1             | 0           | -3.194985               | -2.460474 | 0.639110  |
| 22            | 1             | 0           | -4.405526               | -1.301375 | 1.227438  |
| 23            | 8             | 0           | -2.182586               | 2.108540  | -0.433426 |

### Structure 31b (vacuum)

Energy (Hartrees): -517.558987889  
No imaginary frequencies

Standard orientation:

| Center Number | Atomic Number | Atomic Type | Coordinates (Angstroms) |           |           |
|---------------|---------------|-------------|-------------------------|-----------|-----------|
|               |               |             | X                       | Y         | Z         |
| 1             | 6             | 0           | 2.880759                | 0.478647  | 0.836225  |
| 2             | 6             | 0           | 1.553849                | 0.890419  | 0.786024  |
| 3             | 6             | 0           | 0.637979                | 0.260881  | -0.064814 |
| 4             | 6             | 0           | 1.096252                | -0.791928 | -0.867546 |
| 5             | 6             | 0           | 2.420122                | -1.212675 | -0.808686 |
| 6             | 6             | 0           | 3.317905                | -0.578162 | 0.043812  |
| 7             | 1             | 0           | 3.573459                | 0.978921  | 1.502975  |
| 8             | 1             | 0           | 1.215215                | 1.699977  | 1.423759  |
| 9             | 1             | 0           | 0.410637                | -1.260654 | -1.566623 |
| 10            | 1             | 0           | 2.754652                | -2.026242 | -1.441993 |
| 11            | 1             | 0           | 4.350972                | -0.901800 | 0.087160  |
| 12            | 6             | 0           | -0.769886               | 0.709517  | -0.124710 |
| 13            | 6             | 0           | -1.832502               | -0.136137 | -0.016642 |
| 14            | 1             | 0           | -2.825063               | 0.305513  | -0.072919 |
| 15            | 6             | 0           | -1.073875               | 2.132982  | -0.283915 |
| 16            | 1             | 0           | -0.181984               | 2.784779  | -0.372015 |
| 17            | 1             | 0           | -0.895042               | -1.894856 | 0.314478  |
| 18            | 7             | 0           | -1.799107               | -1.471601 | 0.153816  |
| 19            | 6             | 0           | -2.975135               | -2.249226 | 0.496639  |
| 20            | 1             | 0           | -3.121004               | -2.322698 | 1.578659  |
| 21            | 1             | 0           | -3.853241               | -1.775828 | 0.057544  |
| 22            | 1             | 0           | -2.887347               | -3.253905 | 0.082685  |
| 23            | 8             | 0           | -2.185040               | 2.617761  | -0.331093 |

### Structure 31b (CHCl<sub>3</sub>)

Energy (Hartrees): -517.579053273  
No imaginary frequencies

Standard orientation:

| Center Number | Atomic Number | Atomic Type | Coordinates (Angstroms) |           |           |
|---------------|---------------|-------------|-------------------------|-----------|-----------|
|               |               |             | X                       | Y         | Z         |
| 1             | 6             | 0           | 2.899476                | 0.474048  | 0.810265  |
| 2             | 6             | 0           | 1.573228                | 0.891897  | 0.765751  |
| 3             | 6             | 0           | 0.642727                | 0.248078  | -0.060128 |
| 4             | 6             | 0           | 1.085595                | -0.828912 | -0.840562 |
| 5             | 6             | 0           | 2.408495                | -1.255534 | -0.786832 |
| 6             | 6             | 0           | 3.321776                | -0.604500 | 0.037976  |
| 7             | 1             | 0           | 3.602620                | 0.987231  | 1.456841  |
| 8             | 1             | 0           | 1.248518                | 1.720633  | 1.386803  |
| 9             | 1             | 0           | 0.390886                | -1.318639 | -1.516309 |
| 10            | 1             | 0           | 2.729085                | -2.088607 | -1.402514 |
| 11            | 1             | 0           | 4.354060                | -0.932910 | 0.076219  |
| 12            | 6             | 0           | -0.761101               | 0.715109  | -0.120336 |
| 13            | 6             | 0           | -1.844681               | -0.119873 | 0.005622  |
| 14            | 1             | 0           | -2.831849               | 0.332156  | -0.056452 |
| 15            | 6             | 0           | -1.033384               | 2.128083  | -0.295247 |
| 16            | 1             | 0           | -0.130620               | 2.757828  | -0.410487 |
| 17            | 1             | 0           | -0.944023               | -1.899514 | 0.332448  |
| 18            | 7             | 0           | -1.836258               | -1.436443 | 0.211051  |
| 19            | 6             | 0           | -3.031405               | -2.225695 | 0.452716  |
| 20            | 1             | 0           | -3.101498               | -2.517597 | 1.503456  |
| 21            | 1             | 0           | -3.907674               | -1.632914 | 0.191788  |
| 22            | 1             | 0           | -3.020360               | -3.125299 | -0.164510 |
| 23            | 8             | 0           | -2.137462               | 2.654566  | -0.336249 |

### Structure 31b (DMSO)

Energy (Hartrees): -517.578486433  
No imaginary frequencies

Standard orientation:

| Center<br>Number | Atomic<br>Number | Atomic<br>Type | Coordinates (Angstroms) |           |           |
|------------------|------------------|----------------|-------------------------|-----------|-----------|
|                  |                  |                | X                       | Y         | Z         |
| 1                | 6                | 0              | 2.920496                | 0.489931  | 0.762995  |
| 2                | 6                | 0              | 1.595882                | 0.914595  | 0.723463  |
| 3                | 6                | 0              | 0.645325                | 0.241365  | -0.056534 |
| 4                | 6                | 0              | 1.068441                | -0.873517 | -0.795031 |
| 5                | 6                | 0              | 2.389727                | -1.306265 | -0.745309 |
| 6                | 6                | 0              | 3.322792                | -0.625494 | 0.032914  |
| 7                | 1                | 0              | 3.637767                | 1.026892  | 1.373974  |
| 8                | 1                | 0              | 1.289926                | 1.772324  | 1.314158  |
| 9                | 1                | 0              | 0.360557                | -1.394390 | -1.432672 |
| 10               | 1                | 0              | 2.692458                | -2.170221 | -1.326866 |
| 11               | 1                | 0              | 4.353309                | -0.960088 | 0.068583  |
| 12               | 6                | 0              | -0.754874               | 0.718516  | -0.113103 |
| 13               | 6                | 0              | -1.849683               | -0.107786 | 0.019481  |
| 14               | 1                | 0              | -2.832753               | 0.351649  | -0.051830 |
| 15               | 6                | 0              | -1.012542               | 2.130171  | -0.299802 |
| 16               | 1                | 0              | -0.102673               | 2.745629  | -0.435672 |
| 17               | 1                | 0              | -0.973347               | -1.898857 | 0.357944  |
| 18               | 7                | 0              | -1.856901               | -1.416246 | 0.244519  |
| 19               | 6                | 0              | -3.063347               | -2.206447 | 0.420002  |
| 20               | 1                | 0              | -3.119246               | -2.601085 | 1.436565  |
| 21               | 1                | 0              | -3.931228               | -1.574418 | 0.235155  |
| 22               | 1                | 0              | -3.074056               | -3.039148 | -0.285385 |
| 23               | 8                | 0              | -2.109463               | 2.675628  | -0.332507 |

### Structure 31b (C<sub>2</sub>H<sub>5</sub>OH)

Energy (Hartrees): -517.581906803  
No imaginary frequencies

Standard orientation:

| Center<br>Number | Atomic<br>Number | Atomic<br>Type | Coordinates (Angstroms) |           |           |
|------------------|------------------|----------------|-------------------------|-----------|-----------|
|                  |                  |                | X                       | Y         | Z         |
| 1                | 6                | 0              | 2.909525                | 0.479056  | 0.786746  |
| 2                | 6                | 0              | 1.584005                | 0.901459  | 0.748732  |
| 3                | 6                | 0              | 0.642874                | 0.246795  | -0.056442 |
| 4                | 6                | 0              | 1.072557                | -0.846849 | -0.821363 |
| 5                | 6                | 0              | 2.394319                | -1.278095 | -0.772904 |
| 6                | 6                | 0              | 3.319369                | -0.615579 | 0.030173  |
| 7                | 1                | 0              | 3.621324                | 1.001458  | 1.416560  |
| 8                | 1                | 0              | 1.270377                | 1.743189  | 1.358225  |
| 9                | 1                | 0              | 0.369749                | -1.350648 | -1.478298 |
| 10               | 1                | 0              | 2.703925                | -2.125614 | -1.374719 |
| 11               | 1                | 0              | 4.350635                | -0.948405 | 0.064454  |
| 12               | 6                | 0              | -0.759599               | 0.721934  | -0.113625 |
| 13               | 6                | 0              | -1.851984               | -0.113434 | 0.024588  |
| 14               | 1                | 0              | -2.840907               | 0.331944  | -0.053083 |
| 15               | 6                | 0              | -1.018463               | 2.121694  | -0.303529 |
| 16               | 1                | 0              | -0.115960               | 2.743444  | -0.442188 |
| 17               | 1                | 0              | -0.951348               | -1.886927 | 0.371915  |
| 18               | 7                | 0              | -1.842325               | -1.415630 | 0.263446  |
| 19               | 6                | 0              | -3.038630               | -2.227825 | 0.415439  |
| 20               | 1                | 0              | -3.089098               | -2.647363 | 1.421852  |
| 21               | 1                | 0              | -3.915545               | -1.604719 | 0.244258  |
| 22               | 1                | 0              | -3.033661               | -3.042568 | -0.310725 |
| 23               | 8                | 0              | -2.124632               | 2.670087  | -0.336159 |

### Structure 31c (vacuum)

Energy (Hartrees): -517.559860179  
No imaginary frequencies

Standard orientation:

| Center<br>Number | Atomic<br>Number | Atomic<br>Type | Coordinates (Angstroms) |           |           |
|------------------|------------------|----------------|-------------------------|-----------|-----------|
|                  |                  |                | X                       | Y         | Z         |
| 1                | 6                | 0              | 2.755543                | -0.080005 | 0.850411  |
| 2                | 6                | 0              | 1.545813                | 0.597302  | 0.765885  |
| 3                | 6                | 0              | 0.528507                | 0.131398  | -0.073851 |
| 4                | 6                | 0              | 0.765845                | -1.014585 | -0.841467 |
| 5                | 6                | 0              | 1.977305                | -1.693014 | -0.754378 |
| 6                | 6                | 0              | 2.974488                | -1.229670 | 0.096624  |
| 7                | 1                | 0              | 3.533330                | 0.293845  | 1.505965  |
| 8                | 1                | 0              | 1.384077                | 1.501125  | 1.339482  |
| 9                | 1                | 0              | 0.005276                | -1.356608 | -1.536504 |
| 10               | 1                | 0              | 2.146501                | -2.574712 | -1.361689 |
| 11               | 1                | 0              | 3.920260                | -1.754187 | 0.164201  |
| 12               | 6                | 0              | -0.765836               | 0.843566  | -0.155003 |
| 13               | 6                | 0              | -1.970597               | 0.216028  | -0.067688 |
| 14               | 1                | 0              | -2.873597               | 0.820013  | -0.136622 |
| 15               | 6                | 0              | -0.816093               | 2.297057  | -0.284718 |
| 16               | 1                | 0              | -1.845356               | 2.707858  | -0.364336 |
| 17               | 1                | 0              | -1.393975               | -1.683818 | 0.294735  |
| 18               | 7                | 0              | -2.199594               | -1.105726 | 0.095879  |
| 19               | 6                | 0              | -3.500310               | -1.617877 | 0.485846  |
| 20               | 1                | 0              | -3.673643               | -1.540339 | 1.564025  |
| 21               | 1                | 0              | -4.277432               | -1.056906 | -0.034689 |
| 22               | 1                | 0              | -3.584210               | -2.663034 | 0.189415  |
| 23               | 8                | 0              | 0.135993                | 3.043206  | -0.303137 |

### Structure 31c (CHCl<sub>3</sub>)

Energy (Hartrees): -517.581162894  
No imaginary frequencies

Standard orientation:

| Center<br>Number | Atomic<br>Number | Atomic<br>Type | Coordinates (Angstroms) |           |           |
|------------------|------------------|----------------|-------------------------|-----------|-----------|
|                  |                  |                | X                       | Y         | Z         |
| 1                | 6                | 0              | 2.770890                | -0.096475 | 0.851980  |
| 2                | 6                | 0              | 1.556497                | 0.576903  | 0.787465  |
| 3                | 6                | 0              | 0.533033                | 0.126521  | -0.055216 |
| 4                | 6                | 0              | 0.766586                | -1.010612 | -0.838529 |
| 5                | 6                | 0              | 1.980969                | -1.687643 | -0.770094 |
| 6                | 6                | 0              | 2.987013                | -1.233498 | 0.077232  |
| 7                | 1                | 0              | 3.551471                | 0.267976  | 1.510479  |
| 8                | 1                | 0              | 1.394576                | 1.462749  | 1.390055  |
| 9                | 1                | 0              | -0.000321               | -1.353693 | -1.526356 |
| 10               | 1                | 0              | 2.144952                | -2.563633 | -1.387898 |
| 11               | 1                | 0              | 3.934774                | -1.757210 | 0.129003  |
| 12               | 6                | 0              | -0.758350               | 0.849017  | -0.122148 |
| 13               | 6                | 0              | -1.978867               | 0.228847  | -0.019000 |
| 14               | 1                | 0              | -2.874416               | 0.843388  | -0.087101 |
| 15               | 6                | 0              | -0.804292               | 2.284972  | -0.278824 |
| 16               | 1                | 0              | -1.829410               | 2.703379  | -0.329829 |
| 17               | 1                | 0              | -1.428291               | -1.686880 | 0.315606  |
| 18               | 7                | 0              | -2.218128               | -1.070936 | 0.169514  |
| 19               | 6                | 0              | -3.542922               | -1.614883 | 0.412761  |
| 20               | 1                | 0              | -3.719482               | -1.774851 | 1.479698  |
| 21               | 1                | 0              | -4.288951               | -0.917727 | 0.031099  |
| 22               | 1                | 0              | -3.654905               | -2.564544 | -0.111213 |
| 23               | 8                | 0              | 0.154195                | 3.037339  | -0.359237 |

### Structure 31c (DMSO)

Energy (Hartrees): -517.581616964  
No imaginary frequencies

Standard orientation:

| Center<br>Number | Atomic<br>Number | Atomic<br>Type | Coordinates (Angstroms) |           |           |
|------------------|------------------|----------------|-------------------------|-----------|-----------|
|                  |                  |                | X                       | Y         | Z         |
| 1                | 6                | 0              | 2.774445                | -0.097923 | 0.852076  |
| 2                | 6                | 0              | 1.559287                | 0.575596  | 0.790299  |
| 3                | 6                | 0              | 0.533912                | 0.128640  | -0.053110 |
| 4                | 6                | 0              | 0.766714                | -1.007502 | -0.838729 |
| 5                | 6                | 0              | 1.981623                | -1.684742 | -0.773620 |
| 6                | 6                | 0              | 2.989911                | -1.232616 | 0.072612  |
| 7                | 1                | 0              | 3.554845                | 0.262164  | 1.513539  |
| 8                | 1                | 0              | 1.396820                | 1.456428  | 1.400421  |
| 9                | 1                | 0              | -0.002989               | -1.355074 | -1.521131 |
| 10               | 1                | 0              | 2.142317                | -2.561452 | -1.391381 |
| 11               | 1                | 0              | 3.936752                | -1.758331 | 0.123260  |
| 12               | 6                | 0              | -0.757421               | 0.850902  | -0.115904 |
| 13               | 6                | 0              | -1.980943               | 0.227300  | -0.008345 |
| 14               | 1                | 0              | -2.876284               | 0.842490  | -0.073531 |
| 15               | 6                | 0              | -0.807154               | 2.282855  | -0.275387 |
| 16               | 1                | 0              | -1.834026               | 2.696600  | -0.317323 |
| 17               | 1                | 0              | -1.430099               | -1.692436 | 0.310022  |
| 18               | 7                | 0              | -2.217144               | -1.067426 | 0.183119  |
| 19               | 6                | 0              | -3.543532               | -1.620992 | 0.399642  |
| 20               | 1                | 0              | -3.719753               | -1.818245 | 1.459869  |
| 21               | 1                | 0              | -4.288000               | -0.911146 | 0.039989  |
| 22               | 1                | 0              | -3.647548               | -2.552865 | -0.156689 |
| 23               | 8                | 0              | 0.148366                | 3.041842  | -0.370761 |

### Structure 31c (C<sub>2</sub>H<sub>5</sub>OH)

Energy (Hartrees): -517.585476984  
No imaginary frequencies

Standard orientation:

| Center<br>Number | Atomic<br>Number | Atomic<br>Type | Coordinates (Angstroms) |           |           |
|------------------|------------------|----------------|-------------------------|-----------|-----------|
|                  |                  |                | X                       | Y         | Z         |
| 1                | 6                | 0              | 2.754491                | -0.123694 | 0.890824  |
| 2                | 6                | 0              | 1.536603                | 0.545879  | 0.836962  |
| 3                | 6                | 0              | 0.531556                | 0.132691  | -0.045886 |
| 4                | 6                | 0              | 0.781569                | -0.967597 | -0.875000 |
| 5                | 6                | 0              | 1.998230                | -1.641988 | -0.816714 |
| 6                | 6                | 0              | 2.989071                | -1.221437 | 0.065867  |
| 7                | 1                | 0              | 3.521287                | 0.211226  | 1.580861  |
| 8                | 1                | 0              | 1.356919                | 1.394708  | 1.487533  |
| 9                | 1                | 0              | 0.023150                | -1.288505 | -1.582848 |
| 10               | 1                | 0              | 2.174907                | -2.490542 | -1.468571 |
| 11               | 1                | 0              | 3.938042                | -1.744087 | 0.109933  |
| 12               | 6                | 0              | -0.761667               | 0.854835  | -0.106594 |
| 13               | 6                | 0              | -1.985669               | 0.224782  | 0.002533  |
| 14               | 1                | 0              | -2.885285               | 0.833394  | -0.062845 |
| 15               | 6                | 0              | -0.815175               | 2.274921  | -0.275093 |
| 16               | 1                | 0              | -1.835851               | 2.697357  | -0.312060 |
| 17               | 1                | 0              | -1.413558               | -1.688022 | 0.306666  |
| 18               | 7                | 0              | -2.207661               | -1.068446 | 0.194096  |
| 19               | 6                | 0              | -3.530464               | -1.641400 | 0.387353  |
| 20               | 1                | 0              | -3.713830               | -1.855569 | 1.442774  |
| 21               | 1                | 0              | -4.279545               | -0.935599 | 0.029719  |
| 22               | 1                | 0              | -3.616402               | -2.566529 | -0.182950 |
| 23               | 8                | 0              | 0.149065                | 3.036168  | -0.386549 |

### Structure 31d (vacuum)

Energy (Hartrees): -517.551218220  
No imaginary frequencies

Standard orientation:

| Center<br>Number | Atomic<br>Number | Atomic<br>Type | Coordinates (Angstroms) |           |           |
|------------------|------------------|----------------|-------------------------|-----------|-----------|
|                  |                  |                | X                       | Y         | Z         |
| 1                | 6                | 0              | 2.995038                | 0.351002  | 0.722393  |
| 2                | 6                | 0              | 1.676128                | 0.777570  | 0.639584  |
| 3                | 6                | 0              | 0.720466                | 0.009337  | -0.036081 |
| 4                | 6                | 0              | 1.134593                | -1.179402 | -0.646116 |
| 5                | 6                | 0              | 2.453838                | -1.610253 | -0.555282 |
| 6                | 6                | 0              | 3.389840                | -0.846148 | 0.131284  |
| 7                | 1                | 0              | 3.719892                | 0.957696  | 1.252570  |
| 8                | 1                | 0              | 1.380184                | 1.712681  | 1.096982  |
| 9                | 1                | 0              | 0.420650                | -1.759859 | -1.220910 |
| 10               | 1                | 0              | 2.752296                | -2.533989 | -1.037404 |
| 11               | 1                | 0              | 4.420467                | -1.174240 | 0.196545  |
| 12               | 6                | 0              | -0.699497               | 0.429405  | -0.093463 |
| 13               | 6                | 0              | -1.677698               | -0.509577 | 0.067238  |
| 14               | 1                | 0              | -1.371634               | -1.519322 | 0.335201  |
| 15               | 6                | 0              | -1.047967               | 1.833124  | -0.289977 |
| 16               | 1                | 0              | -2.132632               | 2.066603  | -0.244561 |
| 17               | 1                | 0              | -3.398254               | 0.511348  | -0.330566 |
| 18               | 7                | 0              | -3.018553               | -0.390519 | -0.091196 |
| 19               | 6                | 0              | -3.940257               | -1.355844 | 0.479328  |
| 20               | 1                | 0              | -4.872364               | -1.347927 | -0.084939 |
| 21               | 1                | 0              | -3.503770               | -2.352535 | 0.399345  |
| 22               | 1                | 0              | -4.159769               | -1.154271 | 1.532556  |
| 23               | 8                | 0              | -0.269012               | 2.741520  | -0.471238 |

### Structure 31d (CHCl<sub>3</sub>)

Energy (Hartrees): -517.573600113  
No imaginary frequencies

Standard orientation:

| Center<br>Number | Atomic<br>Number | Atomic<br>Type | Coordinates (Angstroms) |           |           |
|------------------|------------------|----------------|-------------------------|-----------|-----------|
|                  |                  |                | X                       | Y         | Z         |
| 1                | 6                | 0              | 3.004285                | 0.334546  | 0.715256  |
| 2                | 6                | 0              | 1.685754                | 0.768291  | 0.645210  |
| 3                | 6                | 0              | 0.716078                | 0.012070  | -0.027791 |
| 4                | 6                | 0              | 1.119019                | -1.181563 | -0.639814 |
| 5                | 6                | 0              | 2.437296                | -1.621032 | -0.560861 |
| 6                | 6                | 0              | 3.387246                | -0.863569 | 0.116168  |
| 7                | 1                | 0              | 3.736721                | 0.934351  | 1.244161  |
| 8                | 1                | 0              | 1.399925                | 1.698757  | 1.119781  |
| 9                | 1                | 0              | 0.395760                | -1.764265 | -1.201111 |
| 10               | 1                | 0              | 2.723595                | -2.548392 | -1.044543 |
| 11               | 1                | 0              | 4.416834                | -1.198337 | 0.170752  |
| 12               | 6                | 0              | -0.699487               | 0.450431  | -0.078671 |
| 13               | 6                | 0              | -1.691419               | -0.490461 | 0.091175  |
| 14               | 1                | 0              | -1.387842               | -1.500172 | 0.362069  |
| 15               | 6                | 0              | -1.034164               | 1.842844  | -0.282355 |
| 16               | 1                | 0              | -2.111106               | 2.090809  | -0.226602 |
| 17               | 1                | 0              | -3.414586               | 0.527119  | -0.300764 |
| 18               | 7                | 0              | -3.017810               | -0.365072 | -0.042427 |
| 19               | 6                | 0              | -3.946487               | -1.377022 | 0.433374  |
| 20               | 1                | 0              | -4.837943               | -1.376750 | -0.193119 |
| 21               | 1                | 0              | -3.472746               | -2.356840 | 0.363782  |
| 22               | 1                | 0              | -4.240671               | -1.198530 | 1.471404  |
| 23               | 8                | 0              | -0.244000               | 2.750068  | -0.492371 |

### Structure 31d (DMSO)

Energy (Hartrees): -517.574577397  
No imaginary frequencies

Standard orientation:

| Center<br>Number | Atomic<br>Number | Atomic<br>Type | Coordinates (Angstroms) |           |           |
|------------------|------------------|----------------|-------------------------|-----------|-----------|
|                  |                  |                | X                       | Y         | Z         |
| 1                | 6                | 0              | 3.009759                | 0.327152  | 0.711583  |
| 2                | 6                | 0              | 1.691923                | 0.765980  | 0.648008  |
| 3                | 6                | 0              | 0.714857                | 0.016244  | -0.023599 |
| 4                | 6                | 0              | 1.111074                | -1.179649 | -0.637646 |
| 5                | 6                | 0              | 2.428576                | -1.624248 | -0.565489 |
| 6                | 6                | 0              | 3.385876                | -0.871294 | 0.107369  |
| 7                | 1                | 0              | 3.746491                | 0.920964  | 1.241788  |
| 8                | 1                | 0              | 1.411295                | 1.693141  | 1.132377  |
| 9                | 1                | 0              | 0.381488                | -1.762876 | -1.190400 |
| 10               | 1                | 0              | 2.708006                | -2.553740 | -1.049467 |
| 11               | 1                | 0              | 4.414085                | -1.211253 | 0.158072  |
| 12               | 6                | 0              | -0.698538               | 0.460183  | -0.069376 |
| 13               | 6                | 0              | -1.691903               | -0.486384 | 0.105907  |
| 14               | 1                | 0              | -1.383613               | -1.494197 | 0.378607  |
| 15               | 6                | 0              | -1.032097               | 1.848352  | -0.279204 |
| 16               | 1                | 0              | -2.108171               | 2.094975  | -0.220229 |
| 17               | 1                | 0              | -3.413691               | 0.525959  | -0.294491 |
| 18               | 7                | 0              | -3.012486               | -0.360977 | -0.019649 |
| 19               | 6                | 0              | -3.948375               | -1.386572 | 0.411170  |
| 20               | 1                | 0              | -4.754758               | -1.477915 | -0.316720 |
| 21               | 1                | 0              | -3.423881               | -2.339401 | 0.480067  |
| 22               | 1                | 0              | -4.375667               | -1.145026 | 1.387651  |
| 23               | 8                | 0              | -0.242636               | 2.757204  | -0.502756 |

### Structure 31d (C<sub>2</sub>H<sub>5</sub>OH)

Energy (Hartrees): -517.578041441  
No imaginary frequencies

Standard orientation:

| Center<br>Number | Atomic<br>Number | Atomic<br>Type | Coordinates (Angstroms) |           |           |
|------------------|------------------|----------------|-------------------------|-----------|-----------|
|                  |                  |                | X                       | Y         | Z         |
| 1                | 6                | 0              | 3.007392                | 0.312540  | 0.728302  |
| 2                | 6                | 0              | 1.690069                | 0.753903  | 0.670666  |
| 3                | 6                | 0              | 0.715052                | 0.018328  | -0.018089 |
| 4                | 6                | 0              | 1.109020                | -1.166890 | -0.652565 |
| 5                | 6                | 0              | 2.425531                | -1.614756 | -0.585539 |
| 6                | 6                | 0              | 3.382207                | -0.874935 | 0.102647  |
| 7                | 1                | 0              | 3.743930                | 0.895273  | 1.270950  |
| 8                | 1                | 0              | 1.409232                | 1.669990  | 1.177072  |
| 9                | 1                | 0              | 0.378713                | -1.738283 | -1.216934 |
| 10               | 1                | 0              | 2.704753                | -2.535893 | -1.085409 |
| 11               | 1                | 0              | 4.409942                | -1.217209 | 0.149057  |
| 12               | 6                | 0              | -0.698163               | 0.466813  | -0.062661 |
| 13               | 6                | 0              | -1.694831               | -0.480320 | 0.121080  |
| 14               | 1                | 0              | -1.384607               | -1.485020 | 0.402434  |
| 15               | 6                | 0              | -1.028429               | 1.843654  | -0.284259 |
| 16               | 1                | 0              | -2.099872               | 2.101688  | -0.227486 |
| 17               | 1                | 0              | -3.412997               | 0.528361  | -0.290546 |
| 18               | 7                | 0              | -3.011443               | -0.355380 | -0.004655 |
| 19               | 6                | 0              | -3.950934               | -1.389381 | 0.400819  |
| 20               | 1                | 0              | -4.736876               | -1.485460 | -0.348492 |
| 21               | 1                | 0              | -3.421957               | -2.338249 | 0.483958  |
| 22               | 1                | 0              | -4.405425               | -1.149171 | 1.364869  |
| 23               | 8                | 0              | -0.230778               | 2.753486  | -0.521161 |

### Structure 31e (vacuum)

Energy (Hartrees): -517.548977006  
No imaginary frequencies

Standard orientation:

| Center<br>Number | Atomic<br>Number | Atomic<br>Type | Coordinates (Angstroms) |           |           |
|------------------|------------------|----------------|-------------------------|-----------|-----------|
|                  |                  |                | X                       | Y         | Z         |
| 1                | 6                | 0              | -2.958566               | 0.734700  | -0.520680 |
| 2                | 6                | 0              | -1.584787               | 0.933206  | -0.539047 |
| 3                | 6                | 0              | -0.716847               | -0.039247 | -0.026994 |
| 4                | 6                | 0              | -1.272358               | -1.197963 | 0.524773  |
| 5                | 6                | 0              | -2.648932               | -1.400376 | 0.536407  |
| 6                | 6                | 0              | -3.497867               | -0.433589 | 0.012060  |
| 7                | 1                | 0              | -3.614079               | 1.497221  | -0.925106 |
| 8                | 1                | 0              | -1.177449               | 1.847834  | -0.949644 |
| 9                | 1                | 0              | -0.618137               | -1.938719 | 0.972646  |
| 10               | 1                | 0              | -3.056269               | -2.306328 | 0.970161  |
| 11               | 1                | 0              | -4.570937               | -0.583153 | 0.026138  |
| 12               | 6                | 0              | 0.757764                | 0.134894  | -0.087297 |
| 13               | 6                | 0              | 1.506169                | -0.941388 | -0.477044 |
| 14               | 1                | 0              | 0.956004                | -1.800951 | -0.852839 |
| 15               | 6                | 0              | 1.333032                | 1.453846  | 0.182195  |
| 16               | 1                | 0              | 2.409080                | 1.566251  | -0.031249 |
| 17               | 1                | 0              | 3.146834                | -2.023899 | -0.874472 |
| 18               | 7                | 0              | 2.843349                | -1.158189 | -0.463215 |
| 19               | 6                | 0              | 3.851006                | -0.392842 | 0.243036  |
| 20               | 1                | 0              | 4.693454                | -1.047554 | 0.465445  |
| 21               | 1                | 0              | 4.217652                | 0.456969  | -0.337977 |
| 22               | 1                | 0              | 3.436072                | -0.023384 | 1.184422  |
| 23               | 8                | 0              | 0.707831                | 2.419449  | 0.563816  |

### Structure 31e (CHCl<sub>3</sub>)

Energy (Hartrees): -517.571578077  
No imaginary frequencies

Standard orientation:

| Center<br>Number | Atomic<br>Number | Atomic<br>Type | Coordinates (Angstroms) |           |           |
|------------------|------------------|----------------|-------------------------|-----------|-----------|
|                  |                  |                | X                       | Y         | Z         |
| 1                | 6                | 0              | -2.960996               | 0.733079  | -0.536358 |
| 2                | 6                | 0              | -1.585509               | 0.926892  | -0.556466 |
| 3                | 6                | 0              | -0.716182               | -0.039467 | -0.030716 |
| 4                | 6                | 0              | -1.276152               | -1.193544 | 0.529836  |
| 5                | 6                | 0              | -2.654279               | -1.392498 | 0.542482  |
| 6                | 6                | 0              | -3.503365               | -0.428561 | 0.010177  |
| 7                | 1                | 0              | -3.614584               | 1.491714  | -0.952603 |
| 8                | 1                | 0              | -1.177309               | 1.832108  | -0.988508 |
| 9                | 1                | 0              | -0.624528               | -1.937016 | 0.977494  |
| 10               | 1                | 0              | -3.063268               | -2.295579 | 0.981969  |
| 11               | 1                | 0              | -4.577102               | -0.576494 | 0.025181  |
| 12               | 6                | 0              | 0.759291                | 0.138425  | -0.086167 |
| 13               | 6                | 0              | 1.516062                | -0.952027 | -0.459185 |
| 14               | 1                | 0              | 0.968846                | -1.814829 | -0.831693 |
| 15               | 6                | 0              | 1.329908                | 1.443555  | 0.189915  |
| 16               | 1                | 0              | 2.403739                | 1.560565  | -0.017028 |
| 17               | 1                | 0              | 3.139243                | -2.051818 | -0.823323 |
| 18               | 7                | 0              | 2.837576                | -1.172947 | -0.431004 |
| 19               | 6                | 0              | 3.865434                | -0.369719 | 0.202918  |
| 20               | 1                | 0              | 4.723875                | -1.010600 | 0.400495  |
| 21               | 1                | 0              | 4.190152                | 0.462051  | -0.426745 |
| 22               | 1                | 0              | 3.493769                | 0.024709  | 1.152102  |
| 23               | 8                | 0              | 0.703606                | 2.416127  | 0.585133  |



### Structure 31e (DMSO)

Energy (Hartrees): -517.572616403  
No imaginary frequencies

Standard orientation:

| Center<br>Number | Atomic<br>Number | Atomic<br>Type | Coordinates (Angstroms) |           |           |
|------------------|------------------|----------------|-------------------------|-----------|-----------|
|                  |                  |                | X                       | Y         | Z         |
| 1                | 6                | 0              | -2.950984               | 0.726440  | -0.579426 |
| 2                | 6                | 0              | -1.573800               | 0.914007  | -0.585408 |
| 3                | 6                | 0              | -0.713776               | -0.042169 | -0.025032 |
| 4                | 6                | 0              | -1.286336               | -1.182959 | 0.551088  |
| 5                | 6                | 0              | -2.665924               | -1.376307 | 0.549808  |
| 6                | 6                | 0              | -3.505345               | -0.420782 | -0.013371 |
| 7                | 1                | 0              | -3.596148               | 1.476782  | -1.023633 |
| 8                | 1                | 0              | -1.156013               | 1.806339  | -1.035371 |
| 9                | 1                | 0              | -0.644142               | -1.924044 | 1.016288  |
| 10               | 1                | 0              | -3.083170               | -2.270355 | 1.000107  |
| 11               | 1                | 0              | -4.579776               | -0.565378 | -0.010051 |
| 12               | 6                | 0              | 0.762993                | 0.135577  | -0.062192 |
| 13               | 6                | 0              | 1.519573                | -0.970142 | -0.406432 |
| 14               | 1                | 0              | 0.965318                | -1.844805 | -0.738556 |
| 15               | 6                | 0              | 1.322032                | 1.440476  | 0.227234  |
| 16               | 1                | 0              | 2.400417                | 1.561928  | 0.058437  |
| 17               | 1                | 0              | 3.124643                | -2.096531 | -0.746531 |
| 18               | 7                | 0              | 2.834964                | -1.194883 | -0.395869 |
| 19               | 6                | 0              | 3.888362                | -0.338001 | 0.112766  |
| 20               | 1                | 0              | 4.784483                | -0.943889 | 0.236059  |
| 21               | 1                | 0              | 4.112500                | 0.482818  | -0.572635 |
| 22               | 1                | 0              | 3.599868                | 0.073142  | 1.083813  |
| 23               | 8                | 0              | 0.680812                | 2.411416  | 0.611120  |

### Structure 31e (C<sub>2</sub>H<sub>5</sub>OH)

Energy (Hartrees): -517.576248345  
No imaginary frequencies

Standard orientation:

| Center<br>Number | Atomic<br>Number | Atomic<br>Type | Coordinates (Angstroms) |           |           |
|------------------|------------------|----------------|-------------------------|-----------|-----------|
|                  |                  |                | X                       | Y         | Z         |
| 1                | 6                | 0              | -2.949454               | 0.706932  | -0.614408 |
| 2                | 6                | 0              | -1.572470               | 0.896399  | -0.623515 |
| 3                | 6                | 0              | -0.714029               | -0.038627 | -0.028016 |
| 4                | 6                | 0              | -1.283392               | -1.162145 | 0.582430  |
| 5                | 6                | 0              | -2.662519               | -1.357728 | 0.584438  |
| 6                | 6                | 0              | -3.501720               | -0.422206 | -0.011738 |
| 7                | 1                | 0              | -3.595007               | 1.440708  | -1.084884 |
| 8                | 1                | 0              | -1.154067               | 1.772578  | -1.105505 |
| 9                | 1                | 0              | -0.639150               | -1.886377 | 1.071074  |
| 10               | 1                | 0              | -3.080092               | -2.237535 | 1.061781  |
| 11               | 1                | 0              | -4.575950               | -0.568916 | -0.006190 |
| 12               | 6                | 0              | 0.763655                | 0.140783  | -0.064290 |
| 13               | 6                | 0              | 1.520204                | -0.963999 | -0.423570 |
| 14               | 1                | 0              | 0.963370                | -1.831063 | -0.771011 |
| 15               | 6                | 0              | 1.322238                | 1.430912  | 0.242272  |
| 16               | 1                | 0              | 2.399553                | 1.559712  | 0.084285  |
| 17               | 1                | 0              | 3.121922                | -2.088692 | -0.771500 |
| 18               | 7                | 0              | 2.832019                | -1.190816 | -0.410520 |
| 19               | 6                | 0              | 3.884468                | -0.340216 | 0.112606  |
| 20               | 1                | 0              | 4.780511                | -0.947242 | 0.229678  |
| 21               | 1                | 0              | 4.110130                | 0.488613  | -0.562341 |
| 22               | 1                | 0              | 3.593206                | 0.056612  | 1.088584  |
| 23               | 8                | 0              | 0.676194                | 2.404587  | 0.637801  |

### Structure 31f (vacuum)

Energy (Hartrees): -517.552301808  
No imaginary frequencies

Standard orientation:

| Center<br>Number | Atomic<br>Number | Atomic<br>Type | Coordinates (Angstroms) |           |           |
|------------------|------------------|----------------|-------------------------|-----------|-----------|
|                  |                  |                | X                       | Y         | Z         |
| 1                | 6                | 0              | -3.036015               | 1.002709  | -0.296005 |
| 2                | 6                | 0              | -1.651354               | 1.112520  | -0.324176 |
| 3                | 6                | 0              | -0.833940               | 0.022281  | 0.005035  |
| 4                | 6                | 0              | -1.456812               | -1.179071 | 0.365532  |
| 5                | 6                | 0              | -2.842076               | -1.296164 | 0.373198  |
| 6                | 6                | 0              | -3.638639               | -0.203779 | 0.047124  |
| 7                | 1                | 0              | -3.646451               | 1.858874  | -0.559256 |
| 8                | 1                | 0              | -1.196938               | 2.047212  | -0.634440 |
| 9                | 1                | 0              | -0.844953               | -2.022218 | 0.668177  |
| 10               | 1                | 0              | -3.300183               | -2.237700 | 0.653459  |
| 11               | 1                | 0              | -4.718426               | -0.290552 | 0.062461  |
| 12               | 6                | 0              | 0.642383                | 0.137925  | -0.037440 |
| 13               | 6                | 0              | 1.359049                | -0.896384 | -0.583969 |
| 14               | 1                | 0              | 0.798945                | -1.656338 | -1.125728 |
| 15               | 6                | 0              | 1.231209                | 1.409968  | 0.374789  |
| 16               | 1                | 0              | 0.556345                | 2.047762  | 0.977427  |
| 17               | 1                | 0              | 2.997047                | -1.931314 | -1.075797 |
| 18               | 7                | 0              | 2.678123                | -1.148874 | -0.529790 |
| 19               | 6                | 0              | 3.621976                | -0.600291 | 0.428325  |
| 20               | 1                | 0              | 4.424733                | -1.324896 | 0.563913  |
| 21               | 1                | 0              | 4.022925                | 0.359687  | 0.105604  |
| 22               | 1                | 0              | 3.112359                | -0.449454 | 1.382996  |
| 23               | 8                | 0              | 2.334130                | 1.822846  | 0.071904  |

### Structure 31f (CHCl<sub>3</sub>)

Energy (Hartrees): -517.571906192  
No imaginary frequencies

Standard orientation:

| Center<br>Number | Atomic<br>Number | Atomic<br>Type | Coordinates (Angstroms) |           |           |
|------------------|------------------|----------------|-------------------------|-----------|-----------|
|                  |                  |                | X                       | Y         | Z         |
| 1                | 6                | 0              | -3.038290               | 1.010285  | -0.256457 |
| 2                | 6                | 0              | -1.652936               | 1.122343  | -0.289787 |
| 3                | 6                | 0              | -0.830331               | 0.023889  | 0.004798  |
| 4                | 6                | 0              | -1.452103               | -1.189855 | 0.331378  |
| 5                | 6                | 0              | -2.838045               | -1.308209 | 0.342431  |
| 6                | 6                | 0              | -3.638860               | -0.206947 | 0.053942  |
| 7                | 1                | 0              | -3.650377               | 1.873776  | -0.492746 |
| 8                | 1                | 0              | -1.203321               | 2.067020  | -0.576979 |
| 9                | 1                | 0              | -0.841297               | -2.045167 | 0.601283  |
| 10               | 1                | 0              | -3.293487               | -2.259557 | 0.594368  |
| 11               | 1                | 0              | -4.718939               | -0.295804 | 0.071644  |
| 12               | 6                | 0              | 0.645978                | 0.143307  | -0.043043 |
| 13               | 6                | 0              | 1.368689                | -0.899592 | -0.587151 |
| 14               | 1                | 0              | 0.820555                | -1.655100 | -1.146581 |
| 15               | 6                | 0              | 1.230580                | 1.412337  | 0.349778  |
| 16               | 1                | 0              | 0.568602                | 2.052669  | 0.961736  |
| 17               | 1                | 0              | 3.002622                | -1.949091 | -1.035504 |
| 18               | 7                | 0              | 2.675961                | -1.156850 | -0.502584 |
| 19               | 6                | 0              | 3.608610                | -0.603137 | 0.461848  |
| 20               | 1                | 0              | 4.400335                | -1.334927 | 0.619662  |
| 21               | 1                | 0              | 4.033078                | 0.342892  | 0.126143  |
| 22               | 1                | 0              | 3.087842                | -0.426708 | 1.406382  |
| 23               | 8                | 0              | 2.330364                | 1.837677  | 0.022782  |

### Structure 31f (DMSO)

Energy (Hartrees): -517.574736227  
No imaginary frequencies

Standard orientation:

| Center<br>Number | Atomic<br>Number | Atomic<br>Type | Coordinates (Angstroms) |           |           |
|------------------|------------------|----------------|-------------------------|-----------|-----------|
|                  |                  |                | X                       | Y         | Z         |
| 1                | 6                | 0              | -3.048095               | 1.004898  | -0.229202 |
| 2                | 6                | 0              | -1.663885               | 1.129835  | -0.280088 |
| 3                | 6                | 0              | -0.828262               | 0.034918  | -0.008304 |
| 4                | 6                | 0              | -1.434723               | -1.189690 | 0.307966  |
| 5                | 6                | 0              | -2.819673               | -1.320100 | 0.335964  |
| 6                | 6                | 0              | -3.634097               | -0.221605 | 0.074560  |
| 7                | 1                | 0              | -3.670932               | 1.865883  | -0.446808 |
| 8                | 1                | 0              | -1.227447               | 2.082688  | -0.561050 |
| 9                | 1                | 0              | -0.813288               | -2.044641 | 0.554802  |
| 10               | 1                | 0              | -3.262991               | -2.279498 | 0.579848  |
| 11               | 1                | 0              | -4.713289               | -0.320219 | 0.105706  |
| 12               | 6                | 0              | 0.647124                | 0.163073  | -0.062827 |
| 13               | 6                | 0              | 1.373027                | -0.883109 | -0.614918 |
| 14               | 1                | 0              | 0.833788                | -1.619734 | -1.207159 |
| 15               | 6                | 0              | 1.229696                | 1.420659  | 0.327308  |
| 16               | 1                | 0              | 0.564972                | 2.076266  | 0.916545  |
| 17               | 1                | 0              | 3.002435                | -1.943812 | -1.032408 |
| 18               | 7                | 0              | 2.668352                | -1.153680 | -0.497443 |
| 19               | 6                | 0              | 3.579679                | -0.627965 | 0.503343  |
| 20               | 1                | 0              | 4.319307                | -1.399024 | 0.716377  |
| 21               | 1                | 0              | 4.081229                | 0.279705  | 0.167455  |
| 22               | 1                | 0              | 3.022175                | -0.398368 | 1.414123  |
| 23               | 8                | 0              | 2.347604                | 1.838879  | 0.018982  |

### Structure 31f (C<sub>2</sub>H<sub>5</sub>OH)

Energy (Hartrees): -517.574736227  
No imaginary frequencies

Standard orientation:

| Center<br>Number | Atomic<br>Number | Atomic<br>Type | Coordinates (Angstroms) |           |           |
|------------------|------------------|----------------|-------------------------|-----------|-----------|
|                  |                  |                | X                       | Y         | Z         |
| 1                | 6                | 0              | -3.048095               | 1.004898  | -0.229202 |
| 2                | 6                | 0              | -1.663885               | 1.129835  | -0.280088 |
| 3                | 6                | 0              | -0.828262               | 0.034918  | -0.008304 |
| 4                | 6                | 0              | -1.434723               | -1.189690 | 0.307966  |
| 5                | 6                | 0              | -2.819673               | -1.320100 | 0.335964  |
| 6                | 6                | 0              | -3.634097               | -0.221605 | 0.074560  |
| 7                | 1                | 0              | -3.670932               | 1.865883  | -0.446808 |
| 8                | 1                | 0              | -1.227447               | 2.082688  | -0.561050 |
| 9                | 1                | 0              | -0.813288               | -2.044641 | 0.554802  |
| 10               | 1                | 0              | -3.262991               | -2.279498 | 0.579848  |
| 11               | 1                | 0              | -4.713289               | -0.320219 | 0.105706  |
| 12               | 6                | 0              | 0.647124                | 0.163073  | -0.062827 |
| 13               | 6                | 0              | 1.373027                | -0.883109 | -0.614918 |
| 14               | 1                | 0              | 0.833788                | -1.619734 | -1.207159 |
| 15               | 6                | 0              | 1.229696                | 1.420659  | 0.327308  |
| 16               | 1                | 0              | 0.564972                | 2.076266  | 0.916545  |
| 17               | 1                | 0              | 3.002435                | -1.943812 | -1.032408 |
| 18               | 7                | 0              | 2.668352                | -1.153680 | -0.497443 |
| 19               | 6                | 0              | 3.579679                | -0.627965 | 0.503343  |
| 20               | 1                | 0              | 4.319307                | -1.399024 | 0.716377  |
| 21               | 1                | 0              | 4.081229                | 0.279705  | 0.167455  |
| 22               | 1                | 0              | 3.022175                | -0.398368 | 1.414123  |
| 23               | 8                | 0              | 2.347604                | 1.838879  | 0.018982  |

### Structure 31g (vacuum)

Energy (Hartrees): -517.556667801  
No imaginary frequencies

Standard orientation:

| Center Number | Atomic Number | Atomic Type | Coordinates (Angstroms) |           |           |
|---------------|---------------|-------------|-------------------------|-----------|-----------|
|               |               |             | X                       | Y         | Z         |
| 1             | 6             | 0           | 2.751661                | -1.354921 | -0.540097 |
| 2             | 6             | 0           | 1.390815                | -1.077060 | -0.588569 |
| 3             | 6             | 0           | 0.876561                | 0.096142  | -0.024813 |
| 4             | 6             | 0           | 1.767512                | 0.979760  | 0.593751  |
| 5             | 6             | 0           | 3.130742                | 0.710605  | 0.627628  |
| 6             | 6             | 0           | 3.628605                | -0.459418 | 0.063893  |
| 7             | 1             | 0           | 3.129893                | -2.267541 | -0.985975 |
| 8             | 1             | 0           | 0.720927                | -1.765930 | -1.092336 |
| 9             | 1             | 0           | 1.382305                | 1.874272  | 1.070595  |
| 10            | 1             | 0           | 3.804040                | 1.409519  | 1.110167  |
| 11            | 1             | 0           | 4.690036                | -0.673436 | 0.097596  |
| 12            | 6             | 0           | -0.572103               | 0.392092  | -0.087410 |
| 13            | 6             | 0           | -1.017248               | 1.640476  | -0.392114 |
| 14            | 1             | 0           | -0.323867               | 2.447019  | -0.614732 |
| 15            | 6             | 0           | -1.539181               | -0.662296 | 0.178569  |
| 16            | 1             | 0           | -1.141423               | -1.646145 | 0.459535  |
| 17            | 7             | 0           | -2.801854               | -0.463884 | 0.119819  |
| 18            | 6             | 0           | -3.698643               | -1.556910 | 0.433427  |
| 19            | 1             | 0           | -4.329630               | -1.277523 | 1.280218  |
| 20            | 1             | 0           | -4.356727               | -1.743713 | -0.417996 |
| 21            | 1             | 0           | -3.161098               | -2.480260 | 0.679585  |
| 22            | 8             | 0           | -2.286001               | 1.993333  | -0.467802 |
| 23            | 1             | 0           | -2.825790               | 1.173446  | -0.268561 |

### Structure 31g (CHCl<sub>3</sub>)

Energy (Hartrees): -517.571313023  
No imaginary frequencies

Standard orientation:

| Center Number | Atomic Number | Atomic Type | Coordinates (Angstroms) |           |           |
|---------------|---------------|-------------|-------------------------|-----------|-----------|
|               |               |             | X                       | Y         | Z         |
| 1             | 6             | 0           | 2.748309                | -1.376290 | -0.506769 |
| 2             | 6             | 0           | 1.386315                | -1.098523 | -0.550690 |
| 3             | 6             | 0           | 0.878995                | 0.094323  | -0.020110 |
| 4             | 6             | 0           | 1.778083                | 0.998232  | 0.559316  |
| 5             | 6             | 0           | 3.141823                | 0.727702  | 0.587897  |
| 6             | 6             | 0           | 3.633282                | -0.462177 | 0.058397  |
| 7             | 1             | 0           | 3.120428                | -2.304875 | -0.925261 |
| 8             | 1             | 0           | 0.712253                | -1.805933 | -1.022305 |
| 9             | 1             | 0           | 1.401895                | 1.911993  | 1.006780  |
| 10            | 1             | 0           | 3.821129                | 1.442578  | 1.038659  |
| 11            | 1             | 0           | 4.695208                | -0.676799 | 0.088595  |
| 12            | 6             | 0           | -0.570399               | 0.391481  | -0.080563 |
| 13            | 6             | 0           | -1.013538               | 1.641589  | -0.378270 |
| 14            | 1             | 0           | -0.326811               | 2.454616  | -0.598368 |
| 15            | 6             | 0           | -1.541367               | -0.665588 | 0.175519  |
| 16            | 1             | 0           | -1.153505               | -1.654499 | 0.447093  |
| 17            | 7             | 0           | -2.802344               | -0.454962 | 0.116455  |
| 18            | 6             | 0           | -3.711635               | -1.544661 | 0.412313  |
| 19            | 1             | 0           | -4.358031               | -1.261536 | 1.246381  |
| 20            | 1             | 0           | -4.353394               | -1.726943 | -0.452900 |
| 21            | 1             | 0           | -3.181665               | -2.468673 | 0.668251  |
| 22            | 8             | 0           | -2.289837               | 1.985800  | -0.450260 |
| 23            | 1             | 0           | -2.821620               | 1.151882  | -0.252273 |

### Structure 31g (DMSO)

Energy (Hartrees): -517.568963630  
No imaginary frequencies

Standard orientation:

| Center Number | Atomic Number | Atomic Type | Coordinates (Angstroms) |           |           |
|---------------|---------------|-------------|-------------------------|-----------|-----------|
|               |               |             | X                       | Y         | Z         |
| 1             | 6             | 0           | 2.741489                | -1.404738 | -0.458053 |
| 2             | 6             | 0           | 1.378526                | -1.127546 | -0.493343 |
| 3             | 6             | 0           | 0.880327                | 0.090921  | -0.012690 |
| 4             | 6             | 0           | 1.790793                | 1.020258  | 0.508900  |
| 5             | 6             | 0           | 3.154740                | 0.748909  | 0.528064  |
| 6             | 6             | 0           | 3.637177                | -0.466281 | 0.047925  |
| 7             | 1             | 0           | 3.104984                | -2.353425 | -0.837630 |
| 8             | 1             | 0           | 0.697714                | -1.858511 | -0.916513 |
| 9             | 1             | 0           | 1.425042                | 1.956803  | 0.916697  |
| 10            | 1             | 0           | 3.841614                | 1.483433  | 0.934085  |
| 11            | 1             | 0           | 4.699486                | -0.680852 | 0.070925  |
| 12            | 6             | 0           | -0.568648               | 0.389394  | -0.067605 |
| 13            | 6             | 0           | -1.010883               | 1.644629  | -0.352143 |
| 14            | 1             | 0           | -0.322911               | 2.459847  | -0.560973 |
| 15            | 6             | 0           | -1.543964               | -0.668673 | 0.169327  |
| 16            | 1             | 0           | -1.167806               | -1.667274 | 0.416808  |
| 17            | 7             | 0           | -2.803688               | -0.444726 | 0.113129  |
| 18            | 6             | 0           | -3.726321               | -1.532604 | 0.374941  |
| 19            | 1             | 0           | -4.364631               | -1.271722 | 1.222673  |
| 20            | 1             | 0           | -4.375246               | -1.672864 | -0.492851 |
| 21            | 1             | 0           | -3.206476               | -2.471673 | 0.592119  |
| 22            | 8             | 0           | -2.286657               | 1.985504  | -0.422206 |
| 23            | 1             | 0           | -2.812116               | 1.139685  | -0.231540 |

### Structure 31g (C<sub>2</sub>H<sub>5</sub>OH)

Energy (Hartrees): -517.570503198  
No imaginary frequencies

Standard orientation:

| Center Number | Atomic Number | Atomic Type | Coordinates (Angstroms) |           |           |
|---------------|---------------|-------------|-------------------------|-----------|-----------|
|               |               |             | X                       | Y         | Z         |
| 1             | 6             | 0           | 2.738969                | -1.398088 | -0.473919 |
| 2             | 6             | 0           | 1.376768                | -1.117836 | -0.511415 |
| 3             | 6             | 0           | 0.879426                | 0.094551  | -0.015434 |
| 4             | 6             | 0           | 1.788086                | 1.014820  | 0.523878  |
| 5             | 6             | 0           | 3.151454                | 0.740355  | 0.545990  |
| 6             | 6             | 0           | 3.633530                | -0.468565 | 0.050308  |
| 7             | 1             | 0           | 3.103030                | -2.341890 | -0.865242 |
| 8             | 1             | 0           | 0.695938                | -1.840944 | -0.948231 |
| 9             | 1             | 0           | 1.421452                | 1.945932  | 0.943287  |
| 10            | 1             | 0           | 3.838062                | 1.467509  | 0.965702  |
| 11            | 1             | 0           | 4.695411                | -0.685678 | 0.075420  |
| 12            | 6             | 0           | -0.569689               | 0.394760  | -0.072686 |
| 13            | 6             | 0           | -1.008376               | 1.648033  | -0.358087 |
| 14            | 1             | 0           | -0.323672               | 2.465397  | -0.567026 |
| 15            | 6             | 0           | -1.542914               | -0.665134 | 0.172202  |
| 16            | 1             | 0           | -1.159982               | -1.656606 | 0.437532  |
| 17            | 7             | 0           | -2.803311               | -0.451027 | 0.106645  |
| 18            | 6             | 0           | -3.713960               | -1.545055 | 0.388335  |
| 19            | 1             | 0           | -4.365419               | -1.270140 | 1.221339  |
| 20            | 1             | 0           | -4.351344               | -1.719410 | -0.481800 |
| 21            | 1             | 0           | -3.184148               | -2.470177 | 0.638113  |
| 22            | 8             | 0           | -2.290555               | 1.990865  | -0.427416 |
| 23            | 1             | 0           | -2.821465               | 1.149219  | -0.241323 |

### Structure 31h (vacuum)

Energy (Hartrees): -517.532613746  
No imaginary frequencies

Standard orientation:

| Center<br>Number | Atomic<br>Number | Atomic<br>Type | Coordinates (Angstroms) |           |           |
|------------------|------------------|----------------|-------------------------|-----------|-----------|
|                  |                  |                | X                       | Y         | Z         |
| 1                | 6                | 0              | 2.634584                | -1.416386 | -0.540609 |
| 2                | 6                | 0              | 1.284014                | -1.089350 | -0.542832 |
| 3                | 6                | 0              | 0.836664                | 0.120647  | 0.000403  |
| 4                | 6                | 0              | 1.782782                | 0.983729  | 0.563623  |
| 5                | 6                | 0              | 3.135444                | 0.663201  | 0.554756  |
| 6                | 6                | 0              | 3.567205                | -0.538277 | 0.002745  |
| 7                | 1                | 0              | 2.961013                | -2.355673 | -0.971847 |
| 8                | 1                | 0              | 0.566007                | -1.768644 | -0.990204 |
| 9                | 1                | 0              | 1.450663                | 1.901460  | 1.036424  |
| 10               | 1                | 0              | 3.852035                | 1.346334  | 0.996065  |
| 11               | 1                | 0              | 4.620595                | -0.792021 | 0.003243  |
| 12               | 6                | 0              | -0.608466               | 0.456190  | -0.030249 |
| 13               | 6                | 0              | -0.978122               | 1.712226  | -0.328886 |
| 14               | 1                | 0              | -0.219899               | 2.451761  | -0.574973 |
| 15               | 6                | 0              | -1.559419               | -0.625806 | 0.286357  |
| 16               | 1                | 0              | -1.127388               | -1.457728 | 0.865224  |
| 17               | 7                | 0              | -2.776853               | -0.632133 | -0.060239 |
| 18               | 6                | 0              | -3.579270               | -1.758906 | 0.365269  |
| 19               | 1                | 0              | -4.027799               | -2.228572 | -0.513338 |
| 20               | 1                | 0              | -3.012161               | -2.513152 | 0.928279  |
| 21               | 1                | 0              | -4.401303               | -1.394801 | 0.986468  |
| 22               | 8                | 0              | -2.254557               | 2.140216  | -0.343863 |
| 23               | 1                | 0              | -2.279831               | 3.070641  | -0.576225 |

### Structure 31h (CHCl<sub>3</sub>)

Energy (Hartrees): -517.553424866  
No imaginary frequencies

Standard orientation:

| Center<br>Number | Atomic<br>Number | Atomic<br>Type | Coordinates (Angstroms) |           |           |
|------------------|------------------|----------------|-------------------------|-----------|-----------|
|                  |                  |                | X                       | Y         | Z         |
| 1                | 6                | 0              | 2.624116                | -1.437315 | -0.513638 |
| 2                | 6                | 0              | 1.273869                | -1.103923 | -0.516222 |
| 3                | 6                | 0              | 0.834135                | 0.121145  | 0.001751  |
| 4                | 6                | 0              | 1.789372                | 0.995897  | 0.534676  |
| 5                | 6                | 0              | 3.140955                | 0.668696  | 0.524628  |
| 6                | 6                | 0              | 3.564804                | -0.549835 | 0.001558  |
| 7                | 1                | 0              | 2.943310                | -2.389263 | -0.923137 |
| 8                | 1                | 0              | 0.553088                | -1.793538 | -0.943685 |
| 9                | 1                | 0              | 1.467937                | 1.930813  | 0.981013  |
| 10               | 1                | 0              | 3.863086                | 1.361464  | 0.942464  |
| 11               | 1                | 0              | 4.617598                | -0.808211 | 0.001810  |
| 12               | 6                | 0              | -0.611198               | 0.462659  | -0.028145 |
| 13               | 6                | 0              | -0.973729               | 1.726842  | -0.311746 |
| 14               | 1                | 0              | -0.217514               | 2.473037  | -0.540760 |
| 15               | 6                | 0              | -1.562255               | -0.621598 | 0.277125  |
| 16               | 1                | 0              | -1.131020               | -1.459930 | 0.843989  |
| 17               | 7                | 0              | -2.783999               | -0.631652 | -0.064276 |
| 18               | 6                | 0              | -3.574410               | -1.774429 | 0.350456  |
| 19               | 1                | 0              | -4.014166               | -2.243971 | -0.533381 |
| 20               | 1                | 0              | -2.998326               | -2.525024 | 0.907428  |
| 21               | 1                | 0              | -4.404166               | -1.429817 | 0.973349  |
| 22               | 8                | 0              | -2.245837               | 2.159464  | -0.330927 |
| 23               | 1                | 0              | -2.259094               | 3.101457  | -0.534402 |

### Structure 31h (DMSO)

Energy (Hartrees): -517.551193572  
No imaginary frequencies

Standard orientation:

| Center<br>Number | Atomic<br>Number | Atomic<br>Type | Coordinates (Angstroms) |           |           |
|------------------|------------------|----------------|-------------------------|-----------|-----------|
|                  |                  |                | X                       | Y         | Z         |
| 1                | 6                | 0              | 2.597112                | -1.468925 | -0.469823 |
| 2                | 6                | 0              | 1.249542                | -1.122389 | -0.465207 |
| 3                | 6                | 0              | 0.830044                | 0.129331  | 0.004397  |
| 4                | 6                | 0              | 1.801870                | 1.017797  | 0.484026  |
| 5                | 6                | 0              | 3.149814                | 0.675966  | 0.467116  |
| 6                | 6                | 0              | 3.554124                | -0.569134 | -0.008872 |
| 7                | 1                | 0              | 2.900348                | -2.441434 | -0.841508 |
| 8                | 1                | 0              | 0.515932                | -1.825213 | -0.847607 |
| 9                | 1                | 0              | 1.498492                | 1.977189  | 0.889309  |
| 10               | 1                | 0              | 3.884840                | 1.378912  | 0.843688  |
| 11               | 1                | 0              | 4.604527                | -0.837550 | -0.013718 |
| 12               | 6                | 0              | -0.613410               | 0.479329  | -0.017823 |
| 13               | 6                | 0              | -0.973790               | 1.746315  | -0.292093 |
| 14               | 1                | 0              | -0.217637               | 2.492252  | -0.521390 |
| 15               | 6                | 0              | -1.563605               | -0.603516 | 0.300172  |
| 16               | 1                | 0              | -1.155796               | -1.395995 | 0.944189  |
| 17               | 7                | 0              | -2.760222               | -0.663025 | -0.117710 |
| 18               | 6                | 0              | -3.555717               | -1.795667 | 0.320595  |
| 19               | 1                | 0              | -3.915693               | -2.339391 | -0.557106 |
| 20               | 1                | 0              | -3.004411               | -2.486269 | 0.971138  |
| 21               | 1                | 0              | -4.437938               | -1.430956 | 0.853760  |
| 22               | 8                | 0              | -2.244846               | 2.185199  | -0.294948 |
| 23               | 1                | 0              | -2.248252               | 3.133396  | -0.472134 |

### Structure 31h (C<sub>2</sub>H<sub>5</sub>OH)

Energy (Hartrees): -517.557992963  
No imaginary frequencies

Standard orientation:

| Center<br>Number | Atomic<br>Number | Atomic<br>Type | Coordinates (Angstroms) |           |           |
|------------------|------------------|----------------|-------------------------|-----------|-----------|
|                  |                  |                | X                       | Y         | Z         |
| 1                | 6                | 0              | 2.623194                | -1.433638 | -0.521972 |
| 2                | 6                | 0              | 1.272921                | -1.098692 | -0.529087 |
| 3                | 6                | 0              | 0.832606                | 0.123092  | -0.003377 |
| 4                | 6                | 0              | 1.784972                | 0.993351  | 0.542174  |
| 5                | 6                | 0              | 3.136448                | 0.663595  | 0.537943  |
| 6                | 6                | 0              | 3.561751                | -0.551575 | 0.007101  |
| 7                | 1                | 0              | 2.943651                | -2.382803 | -0.937521 |
| 8                | 1                | 0              | 0.553530                | -1.785702 | -0.963831 |
| 9                | 1                | 0              | 1.462710                | 1.927479  | 0.990135  |
| 10               | 1                | 0              | 3.857292                | 1.352385  | 0.964976  |
| 11               | 1                | 0              | 4.614438                | -0.811404 | 0.011400  |
| 12               | 6                | 0              | -0.613357               | 0.465050  | -0.035541 |
| 13               | 6                | 0              | -0.972017               | 1.733111  | -0.311515 |
| 14               | 1                | 0              | -0.218098               | 2.484669  | -0.528020 |
| 15               | 6                | 0              | -1.559129               | -0.623916 | 0.263948  |
| 16               | 1                | 0              | -1.117343               | -1.475275 | 0.800220  |
| 17               | 7                | 0              | -2.790530               | -0.629380 | -0.048439 |
| 18               | 6                | 0              | -3.564038               | -1.788961 | 0.359048  |
| 19               | 1                | 0              | -4.017922               | -2.245126 | -0.524651 |
| 20               | 1                | 0              | -2.968881               | -2.544533 | 0.886545  |
| 21               | 1                | 0              | -4.383680               | -1.466626 | 1.006729  |
| 22               | 8                | 0              | -2.244778               | 2.168434  | -0.337871 |
| 23               | 1                | 0              | -2.253874               | 3.116612  | -0.516274 |

### Structure 3li (vacuum)

Energy (Hartrees): -517.538941162  
No imaginary frequencies

Standard orientation:

| Center<br>Number | Atomic<br>Number | Atomic<br>Type | Coordinates (Angstroms) |           |           |
|------------------|------------------|----------------|-------------------------|-----------|-----------|
|                  |                  |                | X                       | Y         | Z         |
| 1                | 6                | 0              | 2.323466                | -1.711482 | -0.515623 |
| 2                | 6                | 0              | 1.013548                | -1.246793 | -0.526062 |
| 3                | 6                | 0              | 0.688123                | 0.001091  | 0.017125  |
| 4                | 6                | 0              | 1.713967                | 0.772988  | 0.573508  |
| 5                | 6                | 0              | 3.022944                | 0.307679  | 0.583766  |
| 6                | 6                | 0              | 3.334117                | -0.935078 | 0.040308  |
| 7                | 1                | 0              | 2.554298                | -2.678168 | -0.947830 |
| 8                | 1                | 0              | 0.235292                | -1.852073 | -0.978876 |
| 9                | 1                | 0              | 1.479783                | 1.739304  | 1.001251  |
| 10               | 1                | 0              | 3.803856                | 0.917927  | 1.022495  |
| 11               | 1                | 0              | 4.356088                | -1.294926 | 0.050349  |
| 12               | 6                | 0              | -0.718678               | 0.460898  | 0.002042  |
| 13               | 6                | 0              | -1.097806               | 1.730171  | -0.203416 |
| 14               | 1                | 0              | -2.154337               | 1.979493  | -0.199469 |
| 15               | 6                | 0              | -1.783151               | -0.541327 | 0.227769  |
| 16               | 1                | 0              | -1.447865               | -1.482114 | 0.688999  |
| 17               | 7                | 0              | -3.001078               | -0.349365 | -0.060671 |
| 18               | 6                | 0              | -3.944395               | -1.395521 | 0.273657  |
| 19               | 1                | 0              | -4.490078               | -1.688145 | -0.626398 |
| 20               | 1                | 0              | -3.469991               | -2.283879 | 0.711744  |
| 21               | 1                | 0              | -4.679841               | -1.003462 | 0.980822  |
| 22               | 8                | 0              | -0.223760               | 2.735560  | -0.439672 |
| 23               | 1                | 0              | -0.702393               | 3.551372  | -0.599456 |

### Structure 3li (CHCl<sub>3</sub>)

Energy (Hartrees): -517.557739606  
No imaginary frequencies

Standard orientation:

| Center<br>Number | Atomic<br>Number | Atomic<br>Type | Coordinates (Angstroms) |           |           |
|------------------|------------------|----------------|-------------------------|-----------|-----------|
|                  |                  |                | X                       | Y         | Z         |
| 1                | 6                | 0              | 2.298542                | -1.730836 | -0.505136 |
| 2                | 6                | 0              | 0.991562                | -1.255039 | -0.504929 |
| 3                | 6                | 0              | 0.683722                | 0.005172  | 0.023217  |
| 4                | 6                | 0              | 1.724763                | 0.774287  | 0.558411  |
| 5                | 6                | 0              | 3.030833                | 0.297883  | 0.557594  |
| 6                | 6                | 0              | 3.324480                | -0.954941 | 0.025285  |
| 7                | 1                | 0              | 2.514540                | -2.706457 | -0.926066 |
| 8                | 1                | 0              | 0.202061                | -1.863131 | -0.934797 |
| 9                | 1                | 0              | 1.506340                | 1.746062  | 0.983413  |
| 10               | 1                | 0              | 3.822581                | 0.906930  | 0.979316  |
| 11               | 1                | 0              | 4.343966                | -1.323068 | 0.025116  |
| 12               | 6                | 0              | -0.720271               | 0.477627  | 0.017830  |
| 13               | 6                | 0              | -1.089069               | 1.753326  | -0.184233 |
| 14               | 1                | 0              | -2.139141               | 2.027063  | -0.158207 |
| 15               | 6                | 0              | -1.785633               | -0.518201 | 0.259126  |
| 16               | 1                | 0              | -1.472525               | -1.414883 | 0.812222  |
| 17               | 7                | 0              | -2.988354               | -0.371530 | -0.116140 |
| 18               | 6                | 0              | -3.936058               | -1.402049 | 0.263317  |
| 19               | 1                | 0              | -4.437650               | -1.777981 | -0.631864 |
| 20               | 1                | 0              | -3.470625               | -2.241568 | 0.794852  |
| 21               | 1                | 0              | -4.707621               | -0.964100 | 0.902602  |
| 22               | 8                | 0              | -0.211737               | 2.744342  | -0.441458 |
| 23               | 1                | 0              | -0.686775               | 3.573734  | -0.564839 |



### Structure 3li (DMSO)

Energy (Hartrees): -517.554686748  
No imaginary frequencies

Standard orientation:

| Center<br>Number | Atomic<br>Number | Atomic<br>Type | Coordinates (Angstroms) |           |           |
|------------------|------------------|----------------|-------------------------|-----------|-----------|
|                  |                  |                | X                       | Y         | Z         |
| 1                | 6                | 0              | 2.291361                | -1.731359 | -0.510766 |
| 2                | 6                | 0              | 0.985772                | -1.250366 | -0.509633 |
| 3                | 6                | 0              | 0.683131                | 0.010093  | 0.021633  |
| 4                | 6                | 0              | 1.726559                | 0.773306  | 0.561514  |
| 5                | 6                | 0              | 3.031088                | 0.291354  | 0.560312  |
| 6                | 6                | 0              | 3.320282                | -0.960893 | 0.022897  |
| 7                | 1                | 0              | 2.503174                | -2.707609 | -0.932613 |
| 8                | 1                | 0              | 0.193226                | -1.856486 | -0.937044 |
| 9                | 1                | 0              | 1.513384                | 1.743496  | 0.993160  |
| 10               | 1                | 0              | 3.824608                | 0.894795  | 0.987044  |
| 11               | 1                | 0              | 4.338370                | -1.333219 | 0.023529  |
| 12               | 6                | 0              | -0.720487               | 0.484484  | 0.019786  |
| 13               | 6                | 0              | -1.090356               | 1.761000  | -0.178544 |
| 14               | 1                | 0              | -2.138998               | 2.039309  | -0.136902 |
| 15               | 6                | 0              | -1.782609               | -0.512376 | 0.271233  |
| 16               | 1                | 0              | -1.474201               | -1.391523 | 0.853224  |
| 17               | 7                | 0              | -2.979217               | -0.384940 | -0.131590 |
| 18               | 6                | 0              | -3.928024               | -1.410162 | 0.265076  |
| 19               | 1                | 0              | -4.410564               | -1.819265 | -0.626225 |
| 20               | 1                | 0              | -3.465611               | -2.227152 | 0.832029  |
| 21               | 1                | 0              | -4.714051               | -0.955956 | 0.874853  |
| 22               | 8                | 0              | -0.215516               | 2.749253  | -0.451183 |
| 23               | 1                | 0              | -0.690996               | 3.583677  | -0.541519 |

### Structure 3li (C<sub>2</sub>H<sub>5</sub>OH)

Energy (Hartrees): -517.560405069  
No imaginary frequencies

Standard orientation:

| Center<br>Number | Atomic<br>Number | Atomic<br>Type | Coordinates (Angstroms) |           |           |
|------------------|------------------|----------------|-------------------------|-----------|-----------|
|                  |                  |                | X                       | Y         | Z         |
| 1                | 6                | 0              | 2.292566                | -1.713028 | -0.549381 |
| 2                | 6                | 0              | 0.987343                | -1.231024 | -0.549405 |
| 3                | 6                | 0              | 0.678654                | 0.009552  | 0.022899  |
| 4                | 6                | 0              | 1.713720                | 0.750702  | 0.607018  |
| 5                | 6                | 0              | 3.018174                | 0.268280  | 0.606464  |
| 6                | 6                | 0              | 3.314074                | -0.963272 | 0.026575  |
| 7                | 1                | 0              | 2.510454                | -2.672980 | -1.004473 |
| 8                | 1                | 0              | 0.199769                | -1.818841 | -1.010829 |
| 9                | 1                | 0              | 1.492839                | 1.702415  | 1.075700  |
| 10               | 1                | 0              | 3.806017                | 0.853841  | 1.067600  |
| 11               | 1                | 0              | 4.332110                | -1.336043 | 0.027259  |
| 12               | 6                | 0              | -0.724320               | 0.488166  | 0.016269  |
| 13               | 6                | 0              | -1.080795               | 1.766399  | -0.195150 |
| 14               | 1                | 0              | -2.123824               | 2.064123  | -0.161869 |
| 15               | 6                | 0              | -1.786609               | -0.505639 | 0.271479  |
| 16               | 1                | 0              | -1.473209               | -1.386309 | 0.848596  |
| 17               | 7                | 0              | -2.987024               | -0.379844 | -0.122069 |
| 18               | 6                | 0              | -3.926667               | -1.411053 | 0.281767  |
| 19               | 1                | 0              | -4.423708               | -1.814617 | -0.603793 |
| 20               | 1                | 0              | -3.453449               | -2.231602 | 0.834129  |
| 21               | 1                | 0              | -4.703358               | -0.965030 | 0.909112  |
| 22               | 8                | 0              | -0.190269               | 2.740869  | -0.472203 |
| 23               | 1                | 0              | -0.649157               | 3.582496  | -0.580532 |

### Structure 31j (vacuum)

Energy (Hartrees): -517.538843644  
No imaginary frequencies

Standard orientation:

| Center<br>Number | Atomic<br>Number | Atomic<br>Type | Coordinates (Angstroms) |           |           |
|------------------|------------------|----------------|-------------------------|-----------|-----------|
|                  |                  |                | X                       | Y         | Z         |
| 1                | 6                | 0              | 1.870768                | -1.808292 | -0.707593 |
| 2                | 6                | 0              | 0.664678                | -1.119383 | -0.739277 |
| 3                | 6                | 0              | 0.510757                | 0.072410  | -0.025779 |
| 4                | 6                | 0              | 1.585243                | 0.549606  | 0.729188  |
| 5                | 6                | 0              | 2.788514                | -0.144991 | 0.766086  |
| 6                | 6                | 0              | 2.936177                | -1.325174 | 0.045472  |
| 7                | 1                | 0              | 1.976403                | -2.729412 | -1.268782 |
| 8                | 1                | 0              | -0.167294               | -1.506699 | -1.311884 |
| 9                | 1                | 0              | 1.475006                | 1.470699  | 1.288102  |
| 10               | 1                | 0              | 3.610818                | 0.236401  | 1.360122  |
| 11               | 1                | 0              | 3.874260                | -1.867183 | 0.072704  |
| 12               | 6                | 0              | -0.765814               | 0.825273  | -0.075593 |
| 13               | 6                | 0              | -0.820006               | 2.157770  | -0.231175 |
| 14               | 1                | 0              | -1.777545               | 2.671389  | -0.261744 |
| 15               | 6                | 0              | -2.066529               | 0.150864  | 0.047209  |
| 16               | 1                | 0              | -2.941809               | 0.818345  | -0.014497 |
| 17               | 7                | 0              | -2.208545               | -1.094096 | 0.220403  |
| 18               | 6                | 0              | -3.557683               | -1.604166 | 0.341046  |
| 19               | 1                | 0              | -3.723783               | -2.367097 | -0.423337 |
| 20               | 1                | 0              | -3.668158               | -2.094448 | 1.311308  |
| 21               | 1                | 0              | -4.328706               | -0.827139 | 0.243699  |
| 22               | 8                | 0              | 0.279068                | 2.935909  | -0.362299 |
| 23               | 1                | 0              | 0.021442                | 3.843045  | -0.537628 |

### Structure 31j (CHCl<sub>3</sub>)

Energy (Hartrees): -517.559548899  
No imaginary frequencies

Standard orientation:

| Center<br>Number | Atomic<br>Number | Atomic<br>Type | Coordinates (Angstroms) |           |           |
|------------------|------------------|----------------|-------------------------|-----------|-----------|
|                  |                  |                | X                       | Y         | Z         |
| 1                | 6                | 0              | 1.911836                | -1.760640 | -0.753551 |
| 2                | 6                | 0              | 0.699016                | -1.081637 | -0.790074 |
| 3                | 6                | 0              | 0.509163                | 0.076894  | -0.029847 |
| 4                | 6                | 0              | 1.557622                | 0.530711  | 0.776246  |
| 5                | 6                | 0              | 2.769105                | -0.151752 | 0.816380  |
| 6                | 6                | 0              | 2.950954                | -1.299119 | 0.050332  |
| 7                | 1                | 0              | 2.044482                | -2.655376 | -1.351528 |
| 8                | 1                | 0              | -0.108970               | -1.448511 | -1.411001 |
| 9                | 1                | 0              | 1.419772                | 1.422947  | 1.375831  |
| 10               | 1                | 0              | 3.570186                | 0.212514  | 1.449786  |
| 11               | 1                | 0              | 3.894630                | -1.831984 | 0.081008  |
| 12               | 6                | 0              | -0.775948               | 0.817690  | -0.083714 |
| 13               | 6                | 0              | -0.838844               | 2.152461  | -0.238757 |
| 14               | 1                | 0              | -1.797571               | 2.663299  | -0.275257 |
| 15               | 6                | 0              | -2.068178               | 0.131915  | 0.034745  |
| 16               | 1                | 0              | -2.948923               | 0.785136  | -0.054510 |
| 17               | 7                | 0              | -2.198395               | -1.112774 | 0.239537  |
| 18               | 6                | 0              | -3.548201               | -1.630399 | 0.351991  |
| 19               | 1                | 0              | -3.703688               | -2.403932 | -0.404831 |
| 20               | 1                | 0              | -3.669314               | -2.109887 | 1.327022  |
| 21               | 1                | 0              | -4.320583               | -0.858716 | 0.236667  |
| 22               | 8                | 0              | 0.252791                | 2.931135  | -0.368984 |
| 23               | 1                | 0              | -0.012734               | 3.848108  | -0.500577 |

### Structure 31j (DMSO)

Energy (Hartrees): -517.558271033  
No imaginary frequencies

Standard orientation:

| Center<br>Number | Atomic<br>Number | Atomic<br>Type | Coordinates (Angstroms) |           |           |
|------------------|------------------|----------------|-------------------------|-----------|-----------|
|                  |                  |                | X                       | Y         | Z         |
| 1                | 6                | 0              | 1.955325                | -1.683965 | -0.826911 |
| 2                | 6                | 0              | 0.738519                | -1.011169 | -0.867289 |
| 3                | 6                | 0              | 0.503916                | 0.085946  | -0.031720 |
| 4                | 6                | 0              | 1.511969                | 0.489466  | 0.848696  |
| 5                | 6                | 0              | 2.728331                | -0.186131 | 0.892052  |
| 6                | 6                | 0              | 2.953996                | -1.274384 | 0.053859  |
| 7                | 1                | 0              | 2.124631                | -2.529167 | -1.484827 |
| 8                | 1                | 0              | -0.035656               | -1.333650 | -1.554077 |
| 9                | 1                | 0              | 1.338556                | 1.334413  | 1.505619  |
| 10               | 1                | 0              | 3.498972                | 0.138220  | 1.582569  |
| 11               | 1                | 0              | 3.900772                | -1.801672 | 0.087297  |
| 12               | 6                | 0              | -0.787568               | 0.815934  | -0.087427 |
| 13               | 6                | 0              | -0.857715               | 2.150309  | -0.241859 |
| 14               | 1                | 0              | -1.818275               | 2.657826  | -0.280774 |
| 15               | 6                | 0              | -2.069402               | 0.114193  | 0.031373  |
| 16               | 1                | 0              | -2.960029               | 0.750358  | -0.068583 |
| 17               | 7                | 0              | -2.176082               | -1.132332 | 0.249044  |
| 18               | 6                | 0              | -3.518745               | -1.673959 | 0.356575  |
| 19               | 1                | 0              | -3.656161               | -2.455531 | -0.395736 |
| 20               | 1                | 0              | -3.640030               | -2.147663 | 1.334679  |
| 21               | 1                | 0              | -4.301581               | -0.915852 | 0.229277  |
| 22               | 8                | 0              | 0.233383                | 2.928317  | -0.370361 |
| 23               | 1                | 0              | -0.037435               | 3.845063  | -0.499966 |

### Structure 31j (C<sub>2</sub>H<sub>5</sub>OH)

Energy (Hartrees): -517.563722162  
No imaginary frequencies

Standard orientation:

| Center<br>Number | Atomic<br>Number | Atomic<br>Type | Coordinates (Angstroms) |           |           |
|------------------|------------------|----------------|-------------------------|-----------|-----------|
|                  |                  |                | X                       | Y         | Z         |
| 1                | 6                | 0              | 1.976478                | -1.653564 | -0.853483 |
| 2                | 6                | 0              | 0.757208                | -0.985424 | -0.893919 |
| 3                | 6                | 0              | 0.503167                | 0.084647  | -0.029805 |
| 4                | 6                | 0              | 1.494564                | 0.466641  | 0.878480  |
| 5                | 6                | 0              | 2.714151                | -0.203305 | 0.920911  |
| 6                | 6                | 0              | 2.958771                | -1.265179 | 0.054799  |
| 7                | 1                | 0              | 2.160445                | -2.478400 | -1.533125 |
| 8                | 1                | 0              | -0.003782               | -1.289983 | -1.603587 |
| 9                | 1                | 0              | 1.305811                | 1.291413  | 1.557271  |
| 10               | 1                | 0              | 3.472461                | 0.105002  | 1.632274  |
| 11               | 1                | 0              | 3.907960                | -1.788374 | 0.087669  |
| 12               | 6                | 0              | -0.790733               | 0.811698  | -0.085962 |
| 13               | 6                | 0              | -0.857832               | 2.146005  | -0.242879 |
| 14               | 1                | 0              | -1.813518               | 2.661450  | -0.284671 |
| 15               | 6                | 0              | -2.071614               | 0.109688  | 0.031824  |
| 16               | 1                | 0              | -2.961480               | 0.746521  | -0.070082 |
| 17               | 7                | 0              | -2.181101               | -1.137001 | 0.249920  |
| 18               | 6                | 0              | -3.526369               | -1.673505 | 0.351997  |
| 19               | 1                | 0              | -3.665714               | -2.451104 | -0.403912 |
| 20               | 1                | 0              | -3.652227               | -2.151489 | 1.327265  |
| 21               | 1                | 0              | -4.306549               | -0.912560 | 0.226542  |
| 22               | 8                | 0              | 0.237585                | 2.920221  | -0.370884 |
| 23               | 1                | 0              | -0.023125               | 3.838552  | -0.509793 |

### Structure 31k (vacuum)

Energy (Hartrees): -517.538957001  
No imaginary frequencies

Standard orientation:

| Center<br>Number | Atomic<br>Number | Atomic<br>Type | Coordinates (Angstroms) |           |           |
|------------------|------------------|----------------|-------------------------|-----------|-----------|
|                  |                  |                | X                       | Y         | Z         |
| 1                | 6                | 0              | 2.443168                | -1.225642 | -0.754808 |
| 2                | 6                | 0              | 1.101223                | -0.870393 | -0.772238 |
| 3                | 6                | 0              | 0.648568                | 0.230057  | -0.037159 |
| 4                | 6                | 0              | 1.570331                | 0.945865  | 0.730780  |
| 5                | 6                | 0              | 2.915968                | 0.591412  | 0.745634  |
| 6                | 6                | 0              | 3.357171                | -0.495076 | 0.000530  |
| 7                | 1                | 0              | 2.777727                | -2.078330 | -1.334317 |
| 8                | 1                | 0              | 0.393642                | -1.445758 | -1.354400 |
| 9                | 1                | 0              | 1.224614                | 1.773177  | 1.341147  |
| 10               | 1                | 0              | 3.614479                | 1.157768  | 1.350578  |
| 11               | 1                | 0              | 4.403271                | -0.777947 | 0.014215  |
| 12               | 6                | 0              | -0.772373               | 0.654041  | -0.092600 |
| 13               | 6                | 0              | -1.057026               | 1.951362  | -0.283337 |
| 14               | 1                | 0              | -0.268115               | 2.681943  | -0.436746 |
| 15               | 6                | 0              | -1.872702               | -0.310272 | 0.059785  |
| 16               | 1                | 0              | -2.882583               | 0.111629  | -0.016791 |
| 17               | 7                | 0              | -1.680054               | -1.544680 | 0.271752  |
| 18               | 6                | 0              | -2.849819               | -2.385316 | 0.416034  |
| 19               | 1                | 0              | -2.817390               | -3.176490 | -0.337244 |
| 20               | 1                | 0              | -2.816024               | -2.874351 | 1.392607  |
| 21               | 1                | 0              | -3.796970               | -1.837507 | 0.321125  |
| 22               | 8                | 0              | -2.330424               | 2.427165  | -0.293470 |
| 23               | 1                | 0              | -2.335938               | 3.345081  | -0.570392 |

### Structure 31k (CHCl<sub>3</sub>)

Energy (Hartrees): -517.558668101  
No imaginary frequencies

Standard orientation:

| Center<br>Number | Atomic<br>Number | Atomic<br>Type | Coordinates (Angstroms) |           |           |
|------------------|------------------|----------------|-------------------------|-----------|-----------|
|                  |                  |                | X                       | Y         | Z         |
| 1                | 6                | 0              | 2.451690                | -1.215390 | -0.774433 |
| 2                | 6                | 0              | 1.109499                | -0.857248 | -0.792019 |
| 3                | 6                | 0              | 0.650348                | 0.227988  | -0.036066 |
| 4                | 6                | 0              | 1.569647                | 0.929725  | 0.749589  |
| 5                | 6                | 0              | 2.915909                | 0.573359  | 0.764287  |
| 6                | 6                | 0              | 3.361951                | -0.500078 | 0.001335  |
| 7                | 1                | 0              | 2.788837                | -2.055263 | -1.371684 |
| 8                | 1                | 0              | 0.408888                | -1.417084 | -1.399390 |
| 9                | 1                | 0              | 1.223514                | 1.751737  | 1.367320  |
| 10               | 1                | 0              | 3.612127                | 1.130243  | 1.381447  |
| 11               | 1                | 0              | 4.408570                | -0.782716 | 0.014456  |
| 12               | 6                | 0              | -0.772005               | 0.652101  | -0.095580 |
| 13               | 6                | 0              | -1.055231               | 1.954093  | -0.278328 |
| 14               | 1                | 0              | -0.268697               | 2.690002  | -0.418667 |
| 15               | 6                | 0              | -1.871660               | -0.312564 | 0.041462  |
| 16               | 1                | 0              | -2.879449               | 0.097715  | -0.093686 |
| 17               | 7                | 0              | -1.691379               | -1.540756 | 0.306878  |
| 18               | 6                | 0              | -2.870178               | -2.377495 | 0.416082  |
| 19               | 1                | 0              | -2.805608               | -3.185048 | -0.318378 |
| 20               | 1                | 0              | -2.886858               | -2.845831 | 1.403673  |
| 21               | 1                | 0              | -3.808822               | -1.829722 | 0.263555  |
| 22               | 8                | 0              | -2.322031               | 2.427508  | -0.303293 |
| 23               | 1                | 0              | -2.316420               | 3.364239  | -0.528417 |

### Structure 31k (DMSO)

Energy (Hartrees): -517.556629655  
No imaginary frequencies

Standard orientation:

| Center<br>Number | Atomic<br>Number | Atomic<br>Type | Coordinates (Angstroms) |           |           |
|------------------|------------------|----------------|-------------------------|-----------|-----------|
|                  |                  |                | X                       | Y         | Z         |
| 1                | 6                | 0              | 2.452653                | -1.212256 | -0.776056 |
| 2                | 6                | 0              | 1.110519                | -0.852032 | -0.798510 |
| 3                | 6                | 0              | 0.648559                | 0.231660  | -0.040606 |
| 4                | 6                | 0              | 1.565861                | 0.933152  | 0.748152  |
| 5                | 6                | 0              | 2.912153                | 0.575409  | 0.766492  |
| 6                | 6                | 0              | 3.360476                | -0.498914 | 0.005333  |
| 7                | 1                | 0              | 2.792100                | -2.050147 | -1.375065 |
| 8                | 1                | 0              | 0.413668                | -1.407191 | -1.415510 |
| 9                | 1                | 0              | 1.220808                | 1.759353  | 1.360987  |
| 10               | 1                | 0              | 3.606777                | 1.133730  | 1.384295  |
| 11               | 1                | 0              | 4.407040                | -0.781857 | 0.021707  |
| 12               | 6                | 0              | -0.774281               | 0.652328  | -0.102893 |
| 13               | 6                | 0              | -1.061533               | 1.956205  | -0.273047 |
| 14               | 1                | 0              | -0.276791               | 2.696645  | -0.400886 |
| 15               | 6                | 0              | -1.867704               | -0.319650 | 0.020968  |
| 16               | 1                | 0              | -2.875174               | 0.070961  | -0.163249 |
| 17               | 7                | 0              | -1.684440               | -1.538013 | 0.331577  |
| 18               | 6                | 0              | -2.859885               | -2.384709 | 0.418837  |
| 19               | 1                | 0              | -2.752958               | -3.220261 | -0.278412 |
| 20               | 1                | 0              | -2.921669               | -2.812053 | 1.423374  |
| 21               | 1                | 0              | -3.793022               | -1.852016 | 0.198393  |
| 22               | 8                | 0              | -2.328590               | 2.422155  | -0.298214 |
| 23               | 1                | 0              | -2.321898               | 3.364537  | -0.502997 |

### Structure 31k (C<sub>2</sub>H<sub>5</sub>OH)

Energy (Hartrees): -517.561767139  
No imaginary frequencies

Standard orientation:

| Center<br>Number | Atomic<br>Number | Atomic<br>Type | Coordinates (Angstroms) |           |           |
|------------------|------------------|----------------|-------------------------|-----------|-----------|
|                  |                  |                | X                       | Y         | Z         |
| 1                | 6                | 0              | 2.460065                | -1.201511 | -0.787783 |
| 2                | 6                | 0              | 1.117797                | -0.842186 | -0.812191 |
| 3                | 6                | 0              | 0.650783                | 0.230548  | -0.042226 |
| 4                | 6                | 0              | 1.563241                | 0.922568  | 0.760141  |
| 5                | 6                | 0              | 2.909896                | 0.566068  | 0.780576  |
| 6                | 6                | 0              | 3.363078                | -0.497656 | 0.007576  |
| 7                | 1                | 0              | 2.803578                | -2.030949 | -1.396298 |
| 8                | 1                | 0              | 0.424880                | -1.389227 | -1.440920 |
| 9                | 1                | 0              | 1.213525                | 1.739511  | 1.382776  |
| 10               | 1                | 0              | 3.600990                | 1.116682  | 1.409383  |
| 11               | 1                | 0              | 4.409959                | -0.779785 | 0.025634  |
| 12               | 6                | 0              | -0.772767               | 0.649524  | -0.105357 |
| 13               | 6                | 0              | -1.060645               | 1.953551  | -0.275249 |
| 14               | 1                | 0              | -0.279376               | 2.697241  | -0.402183 |
| 15               | 6                | 0              | -1.866070               | -0.322097 | 0.018120  |
| 16               | 1                | 0              | -2.872420               | 0.068630  | -0.172203 |
| 17               | 7                | 0              | -1.688069               | -1.539622 | 0.337131  |
| 18               | 6                | 0              | -2.870064               | -2.378607 | 0.420568  |
| 19               | 1                | 0              | -2.766301               | -3.216924 | -0.273646 |
| 20               | 1                | 0              | -2.940703               | -2.803588 | 1.425329  |
| 21               | 1                | 0              | -3.798666               | -1.840993 | 0.193999  |
| 22               | 8                | 0              | -2.328230               | 2.421231  | -0.300293 |
| 23               | 1                | 0              | -2.325029               | 3.365695  | -0.494488 |

### Structure 311 (vacuum)

Energy (Hartrees): -517.537977589  
No imaginary frequencies

Standard orientation:

| Center<br>Number | Atomic<br>Number | Atomic<br>Type | Coordinates (Angstroms) |           |           |
|------------------|------------------|----------------|-------------------------|-----------|-----------|
|                  |                  |                | X                       | Y         | Z         |
| 1                | 6                | 0              | 2.433970                | -1.219221 | -0.766245 |
| 2                | 6                | 0              | 1.094517                | -0.855880 | -0.790672 |
| 3                | 6                | 0              | 0.640906                | 0.235762  | -0.043898 |
| 4                | 6                | 0              | 1.558813                | 0.937380  | 0.740536  |
| 5                | 6                | 0              | 2.902522                | 0.575747  | 0.761904  |
| 6                | 6                | 0              | 3.344593                | -0.503659 | 0.007318  |
| 7                | 1                | 0              | 2.769446                | -2.065109 | -1.355021 |
| 8                | 1                | 0              | 0.390901                | -1.419220 | -1.389794 |
| 9                | 1                | 0              | 1.212574                | 1.761668  | 1.354560  |
| 10               | 1                | 0              | 3.598856                | 1.132198  | 1.378303  |
| 11               | 1                | 0              | 4.389127                | -0.791804 | 0.026083  |
| 12               | 6                | 0              | -0.779855               | 0.667340  | -0.103467 |
| 13               | 6                | 0              | -1.044959               | 1.974303  | -0.293486 |
| 14               | 1                | 0              | -0.243504               | 2.686485  | -0.451909 |
| 15               | 6                | 0              | -1.861883               | -0.312987 | 0.040229  |
| 16               | 1                | 0              | -2.892927               | 0.055545  | -0.097824 |
| 17               | 7                | 0              | -1.670209               | -1.536896 | 0.301132  |
| 18               | 6                | 0              | -2.829511               | -2.393646 | 0.419276  |
| 19               | 1                | 0              | -2.748803               | -3.207147 | -0.305588 |
| 20               | 1                | 0              | -2.833503               | -2.849831 | 1.411946  |
| 21               | 1                | 0              | -3.781564               | -1.867546 | 0.262228  |
| 22               | 8                | 0              | -2.245942               | 2.589674  | -0.330287 |
| 23               | 1                | 0              | -2.956289               | 1.974817  | -0.127576 |

### Structure 311 (CHCl<sub>3</sub>)

Energy (Hartrees): -517.556901991  
No imaginary frequencies

Standard orientation:

| Center<br>Number | Atomic<br>Number | Atomic<br>Type | Coordinates (Angstroms) |           |           |
|------------------|------------------|----------------|-------------------------|-----------|-----------|
|                  |                  |                | X                       | Y         | Z         |
| 1                | 6                | 0              | 2.442002                | -1.200045 | -0.786120 |
| 2                | 6                | 0              | 1.101853                | -0.836293 | -0.813014 |
| 3                | 6                | 0              | 0.638792                | 0.240156  | -0.047236 |
| 4                | 6                | 0              | 1.551442                | 0.928988  | 0.756185  |
| 5                | 6                | 0              | 2.896331                | 0.566950  | 0.780619  |
| 6                | 6                | 0              | 3.346235                | -0.498587 | 0.009377  |
| 7                | 1                | 0              | 2.782654                | -2.033065 | -1.390864 |
| 8                | 1                | 0              | 0.406213                | -1.386384 | -1.435380 |
| 9                | 1                | 0              | 1.201892                | 1.745649  | 1.378969  |
| 10               | 1                | 0              | 3.588013                | 1.113573  | 1.411826  |
| 11               | 1                | 0              | 4.391436                | -0.785881 | 0.030478  |
| 12               | 6                | 0              | -0.785153               | 0.665221  | -0.111519 |
| 13               | 6                | 0              | -1.053407               | 1.974272  | -0.289998 |
| 14               | 1                | 0              | -0.253156               | 2.690940  | -0.440211 |
| 15               | 6                | 0              | -1.861540               | -0.325016 | 0.013144  |
| 16               | 1                | 0              | -2.883178               | 0.014231  | -0.211674 |
| 17               | 7                | 0              | -1.663853               | -1.532806 | 0.347500  |
| 18               | 6                | 0              | -2.818859               | -2.404904 | 0.419707  |
| 19               | 1                | 0              | -2.682397               | -3.238742 | -0.274021 |
| 20               | 1                | 0              | -2.882766               | -2.832046 | 1.423660  |
| 21               | 1                | 0              | -3.762765               | -1.896074 | 0.185656  |
| 22               | 8                | 0              | -2.253877               | 2.586425  | -0.323758 |
| 23               | 1                | 0              | -2.974120               | 1.981592  | -0.107734 |

### Structure 31l (DMSO)

Energy (Hartrees): -517.555316209  
No imaginary frequencies

Standard orientation:

| Center<br>Number | Atomic<br>Number | Atomic<br>Type | Coordinates (Angstroms) |           |           |
|------------------|------------------|----------------|-------------------------|-----------|-----------|
|                  |                  |                | X                       | Y         | Z         |
| 1                | 6                | 0              | 2.443321                | -1.193249 | -0.795631 |
| 2                | 6                | 0              | 1.102792                | -0.828472 | -0.823158 |
| 3                | 6                | 0              | 0.637353                | 0.240414  | -0.046980 |
| 4                | 6                | 0              | 1.548089                | 0.922797  | 0.764616  |
| 5                | 6                | 0              | 2.893328                | 0.560372  | 0.788587  |
| 6                | 6                | 0              | 3.345478                | -0.499111 | 0.009543  |
| 7                | 1                | 0              | 2.786532                | -2.019196 | -1.408813 |
| 8                | 1                | 0              | 0.409839                | -1.369210 | -1.457477 |
| 9                | 1                | 0              | 1.199058                | 1.737506  | 1.390349  |
| 10               | 1                | 0              | 3.583636                | 1.103498  | 1.424468  |
| 11               | 1                | 0              | 4.390972                | -0.785692 | 0.030115  |
| 12               | 6                | 0              | -0.786351               | 0.665276  | -0.112978 |
| 13               | 6                | 0              | -1.052449               | 1.976461  | -0.281821 |
| 14               | 1                | 0              | -0.250458               | 2.695421  | -0.411944 |
| 15               | 6                | 0              | -1.863128               | -0.325447 | 0.005782  |
| 16               | 1                | 0              | -2.885374               | 0.007111  | -0.224789 |
| 17               | 7                | 0              | -1.662392               | -1.530642 | 0.351893  |
| 18               | 6                | 0              | -2.816753               | -2.406308 | 0.424722  |
| 19               | 1                | 0              | -2.668757               | -3.251353 | -0.253173 |
| 20               | 1                | 0              | -2.892008               | -2.816266 | 1.435335  |
| 21               | 1                | 0              | -3.757419               | -1.903135 | 0.169970  |
| 22               | 8                | 0              | -2.252012               | 2.584410  | -0.324772 |
| 23               | 1                | 0              | -2.973255               | 1.964119  | -0.155214 |

### Structure 31l (C<sub>2</sub>H<sub>5</sub>OH)

Energy (Hartrees): -517.559800602  
No imaginary frequencies

Standard orientation:

| Center<br>Number | Atomic<br>Number | Atomic<br>Type | Coordinates (Angstroms) |           |           |
|------------------|------------------|----------------|-------------------------|-----------|-----------|
|                  |                  |                | X                       | Y         | Z         |
| 1                | 6                | 0              | 2.450003                | -1.180648 | -0.806300 |
| 2                | 6                | 0              | 1.109540                | -0.816416 | -0.837147 |
| 3                | 6                | 0              | 0.638410                | 0.241990  | -0.050268 |
| 4                | 6                | 0              | 1.543763                | 0.915605  | 0.774316  |
| 5                | 6                | 0              | 2.889268                | 0.553951  | 0.801818  |
| 6                | 6                | 0              | 3.346670                | -0.495819 | 0.012894  |
| 7                | 1                | 0              | 2.797747                | -1.998790 | -1.427500 |
| 8                | 1                | 0              | 0.420852                | -1.349060 | -1.483151 |
| 9                | 1                | 0              | 1.189724                | 1.721632  | 1.408539  |
| 10               | 1                | 0              | 3.575588                | 1.089481  | 1.448606  |
| 11               | 1                | 0              | 4.392251                | -0.782303 | 0.036640  |
| 12               | 6                | 0              | -0.787033               | 0.662067  | -0.116621 |
| 13               | 6                | 0              | -1.055370               | 1.972503  | -0.285634 |
| 14               | 1                | 0              | -0.254054               | 2.691268  | -0.422161 |
| 15               | 6                | 0              | -1.859619               | -0.333543 | -0.002273 |
| 16               | 1                | 0              | -2.874787               | -0.004256 | -0.260792 |
| 17               | 7                | 0              | -1.661228               | -1.533027 | 0.366691  |
| 18               | 6                | 0              | -2.818125               | -2.407702 | 0.424011  |
| 19               | 1                | 0              | -2.658873               | -3.258477 | -0.243990 |
| 20               | 1                | 0              | -2.914063               | -2.811012 | 1.435384  |
| 21               | 1                | 0              | -3.753449               | -1.906759 | 0.147032  |
| 22               | 8                | 0              | -2.256536               | 2.585390  | -0.321846 |
| 23               | 1                | 0              | -2.985095               | 1.984417  | -0.119447 |

**Structure 32a (vacuum)**

Energy (Hartrees): -632.076987300

No imaginary frequencies

Standard orientation:

| Center<br>Number | Atomic<br>Number | Atomic<br>Type | Coordinates (Angstroms) |           |           |
|------------------|------------------|----------------|-------------------------|-----------|-----------|
|                  |                  |                | X                       | Y         | Z         |
| 1                | 6                | 0              | 2.262297                | 0.791247  | 0.502311  |
| 2                | 6                | 0              | 0.886611                | 1.016295  | 0.496377  |
| 3                | 6                | 0              | -0.001443               | 0.132453  | -0.115575 |
| 4                | 6                | 0              | 0.541540                | -1.004666 | -0.731839 |
| 5                | 6                | 0              | 1.901952                | -1.254886 | -0.716970 |
| 6                | 6                | 0              | 2.774207                | -0.354578 | -0.101399 |
| 7                | 1                | 0              | 2.911356                | 1.505132  | 0.991240  |
| 8                | 1                | 0              | 0.500192                | 1.894653  | 1.002156  |
| 9                | 1                | 0              | -0.117777               | -1.692714 | -1.250630 |
| 10               | 1                | 0              | 2.320403                | -2.133069 | -1.193397 |
| 11               | 6                | 0              | -1.459253               | 0.389606  | -0.113222 |
| 12               | 6                | 0              | -2.343914               | -0.621856 | 0.184643  |
| 13               | 1                | 0              | -1.951522               | -1.602632 | 0.448968  |
| 14               | 6                | 0              | -1.960783               | 1.705549  | -0.430391 |
| 15               | 1                | 0              | -1.194175               | 2.460544  | -0.683089 |
| 16               | 1                | 0              | -4.050157               | 0.394568  | -0.025388 |
| 17               | 7                | 0              | -3.675729               | -0.526049 | 0.191714  |
| 18               | 6                | 0              | -4.557207               | -1.599248 | 0.598476  |
| 19               | 1                | 0              | -5.346363               | -1.744091 | -0.141157 |
| 20               | 1                | 0              | -3.985227               | -2.524358 | 0.677028  |
| 21               | 1                | 0              | -5.017803               | -1.391876 | 1.567912  |
| 22               | 8                | 0              | -3.145960               | 2.024396  | -0.451001 |
| 23               | 8                | 0              | 4.094399                | -0.679201 | -0.145203 |
| 24               | 6                | 0              | 5.006480                | 0.211013  | 0.460539  |
| 25               | 1                | 0              | 4.809174                | 0.311667  | 1.532710  |
| 26               | 1                | 0              | 5.993904                | -0.221247 | 0.314095  |
| 27               | 1                | 0              | 4.967654                | 1.198632  | -0.010504 |

**Structure 32a (CHCl<sub>3</sub>)**

Energy (Hartrees): -632.095877894

No imaginary frequencies

Standard orientation:

| Center<br>Number | Atomic<br>Number | Atomic<br>Type | Coordinates (Angstroms) |           |           |
|------------------|------------------|----------------|-------------------------|-----------|-----------|
|                  |                  |                | X                       | Y         | Z         |
| 1                | 6                | 0              | 2.274453                | 0.806025  | 0.469117  |
| 2                | 6                | 0              | 0.899457                | 1.040499  | 0.468684  |
| 3                | 6                | 0              | -0.004093               | 0.136849  | -0.094202 |
| 4                | 6                | 0              | 0.525283                | -1.032424 | -0.663203 |
| 5                | 6                | 0              | 1.885087                | -1.291731 | -0.651066 |
| 6                | 6                | 0              | 2.772107                | -0.370426 | -0.087340 |
| 7                | 1                | 0              | 2.934924                | 1.536170  | 0.918060  |
| 8                | 1                | 0              | 0.528791                | 1.945359  | 0.938926  |
| 9                | 1                | 0              | -0.141463               | -1.743733 | -1.139836 |
| 10               | 1                | 0              | 2.286628                | -2.197093 | -1.091883 |
| 11               | 6                | 0              | -1.461546               | 0.405711  | -0.093819 |
| 12               | 6                | 0              | -2.354417               | -0.612625 | 0.196866  |
| 13               | 1                | 0              | -1.965485               | -1.596418 | 0.453402  |
| 14               | 6                | 0              | -1.947720               | 1.716072  | -0.414167 |
| 15               | 1                | 0              | -1.178518               | 2.462729  | -0.679178 |
| 16               | 1                | 0              | -4.068458               | 0.393240  | -0.020395 |
| 17               | 7                | 0              | -3.678103               | -0.517404 | 0.207300  |
| 18               | 6                | 0              | -4.566831               | -1.619771 | 0.520972  |
| 19               | 1                | 0              | -5.199037               | -1.858253 | -0.336906 |
| 20               | 1                | 0              | -3.974482               | -2.497823 | 0.777752  |
| 21               | 1                | 0              | -5.204604               | -1.364650 | 1.369401  |
| 22               | 8                | 0              | -3.135779               | 2.053452  | -0.430875 |
| 23               | 8                | 0              | 4.089160                | -0.706149 | -0.128814 |
| 24               | 6                | 0              | 5.022545                | 0.224116  | 0.393242  |
| 25               | 1                | 0              | 4.853395                | 0.399117  | 1.459963  |
| 26               | 1                | 0              | 6.005017                | -0.223490 | 0.253939  |
| 27               | 1                | 0              | 4.977015                | 1.174480  | -0.147338 |



**Structure 32a (DMSO)**

Energy (Hartrees): -632.095486858

No imaginary frequencies

Standard orientation:

| Center<br>Number | Atomic<br>Number | Atomic<br>Type | Coordinates (Angstroms) |           |           |
|------------------|------------------|----------------|-------------------------|-----------|-----------|
|                  |                  |                | X                       | Y         | Z         |
| 1                | 6                | 0              | 2.279722                | 0.815552  | 0.440981  |
| 2                | 6                | 0              | 0.904632                | 1.052286  | 0.443605  |
| 3                | 6                | 0              | -0.005548               | 0.136279  | -0.090141 |
| 4                | 6                | 0              | 0.519062                | -1.049006 | -0.631626 |
| 5                | 6                | 0              | 1.879179                | -1.309663 | -0.622099 |
| 6                | 6                | 0              | 2.773163                | -0.375947 | -0.088474 |
| 7                | 1                | 0              | 2.943493                | 1.556344  | 0.867337  |
| 8                | 1                | 0              | 0.540581                | 1.970693  | 0.892666  |
| 9                | 1                | 0              | -0.150425               | -1.775229 | -1.081334 |
| 10               | 1                | 0              | 2.271677                | -2.229130 | -1.042053 |
| 11               | 6                | 0              | -1.462437               | 0.409184  | -0.088667 |
| 12               | 6                | 0              | -2.358521               | -0.613130 | 0.190268  |
| 13               | 1                | 0              | -1.972421               | -1.600926 | 0.435098  |
| 14               | 6                | 0              | -1.941296               | 1.723722  | -0.398464 |
| 15               | 1                | 0              | -1.166409               | 2.466953  | -0.656811 |
| 16               | 1                | 0              | -4.076764               | 0.391819  | -0.018211 |
| 17               | 7                | 0              | -3.680037               | -0.517684 | 0.200917  |
| 18               | 6                | 0              | -4.568598               | -1.625574 | 0.501486  |
| 19               | 1                | 0              | -5.192344               | -1.859077 | -0.363702 |
| 20               | 1                | 0              | -3.974653               | -2.502017 | 0.759150  |
| 21               | 1                | 0              | -5.214372               | -1.373154 | 1.344375  |
| 22               | 8                | 0              | -3.127103               | 2.071021  | -0.414169 |
| 23               | 8                | 0              | 4.088445                | -0.712269 | -0.129072 |
| 24               | 6                | 0              | 5.020097                | 0.226736  | 0.386588  |
| 25               | 1                | 0              | 4.844992                | 0.414451  | 1.449980  |
| 26               | 1                | 0              | 6.003945                | -0.220459 | 0.256621  |
| 27               | 1                | 0              | 4.975491                | 1.170865  | -0.164341 |

**Structure 32a (C<sub>2</sub>H<sub>5</sub>OH)**

Energy (Hartrees): -632.098457608

No imaginary frequencies

Standard orientation:

| Center<br>Number | Atomic<br>Number | Atomic<br>Type | Coordinates (Angstroms) |           |           |
|------------------|------------------|----------------|-------------------------|-----------|-----------|
|                  |                  |                | X                       | Y         | Z         |
| 1                | 6                | 0              | 2.276326                | 0.809027  | 0.458713  |
| 2                | 6                | 0              | 0.901569                | 1.046076  | 0.460558  |
| 3                | 6                | 0              | -0.005708               | 0.138472  | -0.091331 |
| 4                | 6                | 0              | 0.517910                | -1.039224 | -0.648384 |
| 5                | 6                | 0              | 1.878036                | -1.300564 | -0.638477 |
| 6                | 6                | 0              | 2.767717                | -0.374006 | -0.088317 |
| 7                | 1                | 0              | 2.940013                | 1.542176  | 0.898219  |
| 8                | 1                | 0              | 0.535401                | 1.957222  | 0.922530  |
| 9                | 1                | 0              | -0.151155               | -1.757606 | -1.111281 |
| 10               | 1                | 0              | 2.273863                | -2.213354 | -1.070231 |
| 11               | 6                | 0              | -1.462799               | 0.413488  | -0.092896 |
| 12               | 6                | 0              | -2.359333               | -0.610975 | 0.193395  |
| 13               | 1                | 0              | -1.968829               | -1.595316 | 0.444885  |
| 14               | 6                | 0              | -1.936643               | 1.720179  | -0.406897 |
| 15               | 1                | 0              | -1.165735               | 2.464091  | -0.668637 |
| 16               | 1                | 0              | -4.081181               | 0.385117  | -0.022788 |
| 17               | 7                | 0              | -3.678194               | -0.519913 | 0.204135  |
| 18               | 6                | 0              | -4.563262               | -1.629725 | 0.511804  |
| 19               | 1                | 0              | -5.189434               | -1.864643 | -0.351005 |
| 20               | 1                | 0              | -3.966975               | -2.504483 | 0.769043  |
| 21               | 1                | 0              | -5.205883               | -1.375245 | 1.356292  |
| 22               | 8                | 0              | -3.129352               | 2.070628  | -0.422541 |
| 23               | 8                | 0              | 4.088080                | -0.711602 | -0.130718 |
| 24               | 6                | 0              | 5.023770                | 0.224159  | 0.388845  |
| 25               | 1                | 0              | 4.850033                | 0.403107  | 1.453543  |
| 26               | 1                | 0              | 6.005709                | -0.225454 | 0.252516  |
| 27               | 1                | 0              | 4.976212                | 1.170114  | -0.158030 |

**Structure 32b (vacuum)**

Energy (Hartrees): -632.071648570

No imaginary frequencies

Standard orientation:

| Center<br>Number | Atomic<br>Number | Atomic<br>Type | Coordinates (Angstroms) |           |           |
|------------------|------------------|----------------|-------------------------|-----------|-----------|
|                  |                  |                | X                       | Y         | Z         |
| 1                | 6                | 0              | -2.053171               | 0.740599  | -0.657763 |
| 2                | 6                | 0              | -0.689708               | 1.031062  | -0.676904 |
| 3                | 6                | 0              | 0.217694                | 0.354318  | 0.136380  |
| 4                | 6                | 0              | -0.291030               | -0.639195 | 0.988343  |
| 5                | 6                | 0              | -1.638635               | -0.950512 | 1.010006  |
| 6                | 6                | 0              | -2.530665               | -0.260752 | 0.184776  |
| 7                | 1                | 0              | -2.719666               | 1.293285  | -1.306050 |
| 8                | 1                | 0              | -0.325957               | 1.797362  | -1.353341 |
| 9                | 1                | 0              | 0.385158                | -1.154983 | 1.663009  |
| 10               | 1                | 0              | -2.032953               | -1.711865 | 1.672020  |
| 11               | 6                | 0              | 1.659111                | 0.687098  | 0.117048  |
| 12               | 6                | 0              | 2.639749                | -0.242669 | -0.047688 |
| 13               | 1                | 0              | 3.668324                | 0.110784  | -0.042153 |
| 14               | 6                | 0              | 2.086869                | 2.079290  | 0.264319  |
| 15               | 1                | 0              | 1.256997                | 2.798407  | 0.416136  |
| 16               | 1                | 0              | 1.536204                | -1.910964 | -0.333143 |
| 17               | 7                | 0              | 2.480761                | -1.571126 | -0.213192 |
| 18               | 6                | 0              | 3.565402                | -2.445540 | -0.617147 |
| 19               | 1                | 0              | 3.646323                | -2.529783 | -1.705351 |
| 20               | 1                | 0              | 4.503102                | -2.048440 | -0.228199 |
| 21               | 1                | 0              | 3.416758                | -3.440045 | -0.195743 |
| 22               | 8                | 0              | 3.233550                | 2.475672  | 0.236752  |
| 23               | 8                | 0              | -3.833988               | -0.632723 | 0.276180  |
| 24               | 6                | 0              | -4.769126               | 0.048295  | -0.533532 |
| 25               | 1                | 0              | -4.546923               | -0.089923 | -1.596506 |
| 26               | 1                | 0              | -5.739080               | -0.389201 | -0.307929 |
| 27               | 1                | 0              | -4.789041               | 1.117683  | -0.300893 |

**Structure 32b (CHCl<sub>3</sub>)**

Energy (Hartrees): -632.092588569

No imaginary frequencies

Standard orientation:

| Center<br>Number | Atomic<br>Number | Atomic<br>Type | Coordinates (Angstroms) |           |           |
|------------------|------------------|----------------|-------------------------|-----------|-----------|
|                  |                  |                | X                       | Y         | Z         |
| 1                | 6                | 0              | -2.071347               | 0.764716  | -0.616953 |
| 2                | 6                | 0              | -0.708545               | 1.061746  | -0.636740 |
| 3                | 6                | 0              | 0.214041                | 0.347899  | 0.129229  |
| 4                | 6                | 0              | -0.280627               | -0.693845 | 0.931306  |
| 5                | 6                | 0              | -1.627311               | -1.013044 | 0.951215  |
| 6                | 6                | 0              | -2.534000               | -0.284410 | 0.175191  |
| 7                | 1                | 0              | -2.748684               | 1.348080  | -1.226804 |
| 8                | 1                | 0              | -0.359003               | 1.866536  | -1.275637 |
| 9                | 1                | 0              | 0.400909                | -1.248490 | 1.569386  |
| 10               | 1                | 0              | -2.003705               | -1.814434 | 1.576651  |
| 11               | 6                | 0              | 1.653628                | 0.697431  | 0.111538  |
| 12               | 6                | 0              | 2.653544                | -0.223341 | -0.086826 |
| 13               | 1                | 0              | 3.679368                | 0.136434  | -0.064699 |
| 14               | 6                | 0              | 2.055809                | 2.077393  | 0.291492  |
| 15               | 1                | 0              | 1.220504                | 2.774972  | 0.494366  |
| 16               | 1                | 0              | 1.577729                | -1.907427 | -0.386574 |
| 17               | 7                | 0              | 2.513695                | -1.526577 | -0.327166 |
| 18               | 6                | 0              | 3.620458                | -2.444238 | -0.528114 |
| 19               | 1                | 0              | 3.522902                | -2.953484 | -1.488688 |
| 20               | 1                | 0              | 4.552501                | -1.880250 | -0.523589 |
| 21               | 1                | 0              | 3.655109                | -3.191508 | 0.268019  |
| 22               | 8                | 0              | 3.199255                | 2.513544  | 0.248173  |
| 23               | 8                | 0              | -3.833915               | -0.668653 | 0.258727  |
| 24               | 6                | 0              | -4.787634               | 0.059218  | -0.497335 |
| 25               | 1                | 0              | -4.583778               | -0.016978 | -1.569777 |
| 26               | 1                | 0              | -5.752961               | -0.395360 | -0.282331 |
| 27               | 1                | 0              | -4.807575               | 1.111656  | -0.199372 |

**Structure 32b (DMSO)**

Energy (Hartrees): -632.092922719

No imaginary frequencies

Standard orientation:

| Center<br>Number | Atomic<br>Number | Atomic<br>Type | Coordinates (Angstroms) |           |           |
|------------------|------------------|----------------|-------------------------|-----------|-----------|
|                  |                  |                | X                       | Y         | Z         |
| 1                | 6                | 0              | -2.080327               | 0.771978  | -0.598222 |
| 2                | 6                | 0              | -0.717380               | 1.069639  | -0.620647 |
| 3                | 6                | 0              | 0.212050                | 0.340191  | 0.123391  |
| 4                | 6                | 0              | -0.276890               | -0.720643 | 0.904303  |
| 5                | 6                | 0              | -1.623924               | -1.039807 | 0.927002  |
| 6                | 6                | 0              | -2.538074               | -0.294232 | 0.175008  |
| 7                | 1                | 0              | -2.761139               | 1.367948  | -1.192123 |
| 8                | 1                | 0              | -0.375079               | 1.889592  | -1.244279 |
| 9                | 1                | 0              | 0.407723                | -1.295331 | 1.521061  |
| 10               | 1                | 0              | -1.990911               | -1.859131 | 1.534963  |
| 11               | 6                | 0              | 1.649724                | 0.698182  | 0.107446  |
| 12               | 6                | 0              | 2.659784                | -0.216469 | -0.091627 |
| 13               | 1                | 0              | 3.682909                | 0.150603  | -0.063460 |
| 14               | 6                | 0              | 2.037409                | 2.079162  | 0.295065  |
| 15               | 1                | 0              | 1.193126                | 2.764829  | 0.502620  |
| 16               | 1                | 0              | 1.604279                | -1.913668 | -0.396206 |
| 17               | 7                | 0              | 2.534202                | -1.516199 | -0.337990 |
| 18               | 6                | 0              | 3.651707                | -2.427245 | -0.513707 |
| 19               | 1                | 0              | 3.561755                | -2.954087 | -1.465069 |
| 20               | 1                | 0              | 4.578680                | -1.854994 | -0.511389 |
| 21               | 1                | 0              | 3.681899                | -3.159507 | 0.296117  |
| 22               | 8                | 0              | 3.175573                | 2.533024  | 0.255753  |
| 23               | 8                | 0              | -3.836388               | -0.678383 | 0.258935  |
| 24               | 6                | 0              | -4.789150               | 0.060542  | -0.491712 |
| 25               | 1                | 0              | -4.577272               | 0.004497  | -1.563538 |
| 26               | 1                | 0              | -5.754796               | -0.399929 | -0.291485 |
| 27               | 1                | 0              | -4.813635               | 1.107652  | -0.176592 |

**Structure 32b (C<sub>2</sub>H<sub>5</sub>OH)**

Energy (Hartrees): -632.096571804

No imaginary frequencies

Standard orientation:

| Center<br>Number | Atomic<br>Number | Atomic<br>Type | Coordinates (Angstroms) |           |           |
|------------------|------------------|----------------|-------------------------|-----------|-----------|
|                  |                  |                | X                       | Y         | Z         |
| 1                | 6                | 0              | -2.069791               | 0.759510  | -0.620978 |
| 2                | 6                | 0              | -0.706531               | 1.054680  | -0.642243 |
| 3                | 6                | 0              | 0.214627                | 0.345893  | 0.130658  |
| 4                | 6                | 0              | -0.279215               | -0.690839 | 0.939157  |
| 5                | 6                | 0              | -1.626952               | -1.007692 | 0.961358  |
| 6                | 6                | 0              | -2.531500               | -0.282772 | 0.180118  |
| 7                | 1                | 0              | -2.746239               | 1.338401  | -1.236292 |
| 8                | 1                | 0              | -0.356888               | 1.854882  | -1.287070 |
| 9                | 1                | 0              | 0.401044                | -1.246875 | 1.577481  |
| 10               | 1                | 0              | -2.001624               | -1.807022 | 1.591120  |
| 11               | 6                | 0              | 1.654413                | 0.699398  | 0.114000  |
| 12               | 6                | 0              | 2.659760                | -0.226303 | -0.087893 |
| 13               | 1                | 0              | 3.687772                | 0.126685  | -0.063403 |
| 14               | 6                | 0              | 2.045133                | 2.069229  | 0.291168  |
| 15               | 1                | 0              | 1.210466                | 2.765174  | 0.490763  |
| 16               | 1                | 0              | 1.579626                | -1.905035 | -0.383355 |
| 17               | 7                | 0              | 2.516003                | -1.520420 | -0.331829 |
| 18               | 6                | 0              | 3.621009                | -2.443801 | -0.530965 |
| 19               | 1                | 0              | 3.517103                | -2.951706 | -1.491063 |
| 20               | 1                | 0              | 4.555445                | -1.884391 | -0.523504 |
| 21               | 1                | 0              | 3.643397                | -3.190503 | 0.265437  |
| 22               | 8                | 0              | 3.193938                | 2.522291  | 0.249106  |
| 23               | 8                | 0              | -3.835789               | -0.664590 | 0.265504  |
| 24               | 6                | 0              | -4.786896               | 0.056319  | -0.508098 |
| 25               | 1                | 0              | -4.573441               | -0.036548 | -1.576736 |
| 26               | 1                | 0              | -5.753368               | -0.395211 | -0.291892 |
| 27               | 1                | 0              | -4.804854               | 1.111763  | -0.223249 |

**Structure 32c (vacuum)**

Energy (Hartrees): -632.072980383

No imaginary frequencies

Standard orientation:

| Center<br>Number | Atomic<br>Number | Atomic<br>Type | Coordinates (Angstroms) |           |           |
|------------------|------------------|----------------|-------------------------|-----------|-----------|
|                  |                  |                | X                       | Y         | Z         |
| 1                | 6                | 0              | -1.966355               | 0.631229  | -0.631759 |
| 2                | 6                | 0              | -0.626361               | 1.009512  | -0.635458 |
| 3                | 6                | 0              | 0.320059                | 0.340214  | 0.138623  |
| 4                | 6                | 0              | -0.123870               | -0.715968 | 0.947925  |
| 5                | 6                | 0              | -1.451792               | -1.105655 | 0.959911  |
| 6                | 6                | 0              | -2.382492               | -0.435005 | 0.163972  |
| 7                | 1                | 0              | -2.668581               | 1.178775  | -1.245595 |
| 8                | 1                | 0              | -0.315332               | 1.851017  | -1.241745 |
| 9                | 1                | 0              | 0.581802                | -1.219947 | 1.600993  |
| 10               | 1                | 0              | -1.798492               | -1.915264 | 1.590373  |
| 11               | 6                | 0              | 1.742921                | 0.742549  | 0.124151  |
| 12               | 6                | 0              | 2.767172                | -0.142881 | -0.015133 |
| 13               | 1                | 0              | 3.786883                | 0.237339  | -0.002972 |
| 14               | 6                | 0              | 2.129574                | 2.146952  | 0.216249  |
| 15               | 1                | 0              | 3.228163                | 2.312932  | 0.230131  |
| 16               | 1                | 0              | 1.749043                | -1.858227 | -0.317571 |
| 17               | 7                | 0              | 2.675770                | -1.484272 | -0.162356 |
| 18               | 6                | 0              | 3.800261                | -2.286735 | -0.606201 |
| 19               | 1                | 0              | 3.924930                | -2.267669 | -1.693787 |
| 20               | 1                | 0              | 4.713192                | -1.909684 | -0.143617 |
| 21               | 1                | 0              | 3.661836                | -3.318809 | -0.285126 |
| 22               | 8                | 0              | 1.374881                | 3.091781  | 0.265449  |
| 23               | 8                | 0              | -3.662365               | -0.885216 | 0.237956  |
| 24               | 6                | 0              | -4.639030               | -0.215611 | -0.531195 |
| 25               | 1                | 0              | -4.416475               | -0.284368 | -1.600840 |
| 26               | 1                | 0              | -5.581707               | -0.717589 | -0.325270 |
| 27               | 1                | 0              | -4.716306               | 0.837271  | -0.242239 |

**Structure 32c (CHCl<sub>3</sub>)**

Energy (Hartrees): -632.095054360

No imaginary frequencies

Standard orientation:

| Center<br>Number | Atomic<br>Number | Atomic<br>Type | Coordinates (Angstroms) |           |           |
|------------------|------------------|----------------|-------------------------|-----------|-----------|
|                  |                  |                | X                       | Y         | Z         |
| 1                | 6                | 0              | -1.973449               | 0.594089  | -0.667765 |
| 2                | 6                | 0              | -0.632094               | 0.970384  | -0.682311 |
| 3                | 6                | 0              | 0.316145                | 0.333996  | 0.118473  |
| 4                | 6                | 0              | -0.126493               | -0.699852 | 0.957136  |
| 5                | 6                | 0              | -1.455104               | -1.091369 | 0.978970  |
| 6                | 6                | 0              | -2.388558               | -0.445145 | 0.164605  |
| 7                | 1                | 0              | -2.675960               | 1.117776  | -1.302568 |
| 8                | 1                | 0              | -0.320794               | 1.783232  | -1.328003 |
| 9                | 1                | 0              | 0.578541                | -1.189912 | 1.621969  |
| 10               | 1                | 0              | -1.795515               | -1.885659 | 1.633384  |
| 11               | 6                | 0              | 1.735870                | 0.754664  | 0.097785  |
| 12               | 6                | 0              | 2.780325                | -0.122002 | -0.059876 |
| 13               | 1                | 0              | 3.793034                | 0.276191  | -0.052551 |
| 14               | 6                | 0              | 2.105216                | 2.146192  | 0.215922  |
| 15               | 1                | 0              | 3.198083                | 2.330205  | 0.196542  |
| 16               | 1                | 0              | 1.792441                | -1.867028 | -0.314147 |
| 17               | 7                | 0              | 2.708897                | -1.445195 | -0.229816 |
| 18               | 6                | 0              | 3.857364                | -2.280721 | -0.533596 |
| 19               | 1                | 0              | 3.904256                | -2.519899 | -1.599285 |
| 20               | 1                | 0              | 4.767489                | -1.752020 | -0.250641 |
| 21               | 1                | 0              | 3.804093                | -3.209564 | 0.035472  |
| 22               | 8                | 0              | 1.340175                | 3.091985  | 0.329261  |
| 23               | 8                | 0              | -3.668670               | -0.890478 | 0.253462  |
| 24               | 6                | 0              | -4.654581               | -0.223699 | -0.517800 |
| 25               | 1                | 0              | -4.452104               | -0.321536 | -1.588636 |
| 26               | 1                | 0              | -5.599253               | -0.711611 | -0.284956 |
| 27               | 1                | 0              | -4.716475               | 0.834910  | -0.248910 |

**Structure 32c (DMSO)**

Energy (Hartrees): -632.096281838

No imaginary frequencies

Standard orientation:

| Center<br>Number | Atomic<br>Number | Atomic<br>Type | Coordinates (Angstroms) |           |           |
|------------------|------------------|----------------|-------------------------|-----------|-----------|
|                  |                  |                | X                       | Y         | Z         |
| 1                | 6                | 0              | -1.979933               | 0.594460  | -0.667635 |
| 2                | 6                | 0              | -0.637463               | 0.969247  | -0.694893 |
| 3                | 6                | 0              | 0.318042                | 0.340276  | 0.103888  |
| 4                | 6                | 0              | -0.119170               | -0.688645 | 0.952055  |
| 5                | 6                | 0              | -1.448183               | -1.078834 | 0.987516  |
| 6                | 6                | 0              | -2.389872               | -0.438551 | 0.176444  |
| 7                | 1                | 0              | -2.685942               | 1.110767  | -1.304944 |
| 8                | 1                | 0              | -0.331643               | 1.773368  | -1.354563 |
| 9                | 1                | 0              | 0.591538                | -1.182898 | 1.607831  |
| 10               | 1                | 0              | -1.777990               | -1.873174 | 1.647560  |
| 11               | 6                | 0              | 1.738047                | 0.761655  | 0.070882  |
| 12               | 6                | 0              | 2.782574                | -0.119667 | -0.101187 |
| 13               | 1                | 0              | 3.797066                | 0.273922  | -0.088993 |
| 14               | 6                | 0              | 2.109398                | 2.146381  | 0.210919  |
| 15               | 1                | 0              | 3.201480                | 2.329024  | 0.172052  |
| 16               | 1                | 0              | 1.782796                | -1.859402 | -0.344140 |
| 17               | 7                | 0              | 2.700145                | -1.432042 | -0.301986 |
| 18               | 6                | 0              | 3.845036                | -2.310460 | -0.466503 |
| 19               | 1                | 0              | 3.775758                | -2.848647 | -1.413393 |
| 20               | 1                | 0              | 4.755846                | -1.712417 | -0.465629 |
| 21               | 1                | 0              | 3.894204                | -3.033988 | 0.350046  |
| 22               | 8                | 0              | 1.348599                | 3.093177  | 0.368216  |
| 23               | 8                | 0              | -3.668086               | -0.881530 | 0.277670  |
| 24               | 6                | 0              | -4.651001               | -0.239463 | -0.521939 |
| 25               | 1                | 0              | -4.433680               | -0.360122 | -1.587230 |
| 26               | 1                | 0              | -5.595193               | -0.728343 | -0.289580 |
| 27               | 1                | 0              | -4.724194               | 0.824639  | -0.279492 |

**Structure 32c (C<sub>2</sub>H<sub>5</sub>OH)**

Energy (Hartrees): -632.100543597

No imaginary frequencies

Standard orientation:

| Center<br>Number | Atomic<br>Number | Atomic<br>Type | Coordinates (Angstroms) |           |           |
|------------------|------------------|----------------|-------------------------|-----------|-----------|
|                  |                  |                | X                       | Y         | Z         |
| 1                | 6                | 0              | -1.963117               | 0.564945  | -0.708609 |
| 2                | 6                | 0              | -0.618807               | 0.932081  | -0.738951 |
| 3                | 6                | 0              | 0.321187                | 0.347007  | 0.109774  |
| 4                | 6                | 0              | -0.128733               | -0.630529 | 1.009618  |
| 5                | 6                | 0              | -1.459724               | -1.013179 | 1.048580  |
| 6                | 6                | 0              | -2.384666               | -0.415732 | 0.188375  |
| 7                | 1                | 0              | -2.659402               | 1.043920  | -1.384645 |
| 8                | 1                | 0              | -0.298152               | 1.692433  | -1.443222 |
| 9                | 1                | 0              | 0.572773                | -1.087546 | 1.701273  |
| 10               | 1                | 0              | -1.805945               | -1.766638 | 1.747503  |
| 11               | 6                | 0              | 1.744791                | 0.759416  | 0.070607  |
| 12               | 6                | 0              | 2.782753                | -0.134930 | -0.103292 |
| 13               | 1                | 0              | 3.801267                | 0.247584  | -0.102098 |
| 14               | 6                | 0              | 2.126865                | 2.130685  | 0.200498  |
| 15               | 1                | 0              | 3.215468                | 2.315729  | 0.155371  |
| 16               | 1                | 0              | 1.754363                | -1.856864 | -0.315814 |
| 17               | 7                | 0              | 2.679467                | -1.443461 | -0.291732 |
| 18               | 6                | 0              | 3.810175                | -2.338037 | -0.478325 |
| 19               | 1                | 0              | 3.724897                | -2.859804 | -1.433016 |
| 20               | 1                | 0              | 4.730146                | -1.754639 | -0.473958 |
| 21               | 1                | 0              | 3.850516                | -3.074702 | 0.326404  |
| 22               | 8                | 0              | 1.365270                | 3.089396  | 0.358703  |
| 23               | 8                | 0              | -3.669963               | -0.850249 | 0.298871  |
| 24               | 6                | 0              | -4.644632               | -0.259013 | -0.551794 |
| 25               | 1                | 0              | -4.408530               | -0.439922 | -1.604003 |
| 26               | 1                | 0              | -5.588808               | -0.740563 | -0.304339 |
| 27               | 1                | 0              | -4.723864               | 0.815778  | -0.366802 |

**Structure 32d (vacuum)**

Energy (Hartrees): -632.063876786

No imaginary frequencies

Standard orientation:

| Center<br>Number | Atomic<br>Number | Atomic<br>Type | Coordinates (Angstroms) |           |           |
|------------------|------------------|----------------|-------------------------|-----------|-----------|
|                  |                  |                | X                       | Y         | Z         |
| 1                | 6                | 0              | 2.151987                | 0.675535  | 0.530938  |
| 2                | 6                | 0              | 0.791678                | 0.970536  | 0.513923  |
| 3                | 6                | 0              | -0.128491               | 0.132433  | -0.115384 |
| 4                | 6                | 0              | 0.366385                | -1.011178 | -0.756799 |
| 5                | 6                | 0              | 1.714768                | -1.323566 | -0.740339 |
| 6                | 6                | 0              | 2.618201                | -0.480272 | -0.093291 |
| 7                | 1                | 0              | 2.829948                | 1.353722  | 1.031199  |
| 8                | 1                | 0              | 0.444777                | 1.875093  | 0.996450  |
| 9                | 1                | 0              | -0.316570               | -1.655373 | -1.300637 |
| 10               | 1                | 0              | 2.097126                | -2.205442 | -1.239523 |
| 11               | 6                | 0              | -1.580228               | 0.428244  | -0.098930 |
| 12               | 6                | 0              | -2.468722               | -0.588794 | 0.098886  |
| 13               | 1                | 0              | -2.069664               | -1.570689 | 0.347964  |
| 14               | 6                | 0              | -2.054896               | 1.798657  | -0.263305 |
| 15               | 1                | 0              | -3.150846               | 1.941114  | -0.156664 |
| 16               | 1                | 0              | -4.281283               | 0.288150  | -0.225037 |
| 17               | 7                | 0              | -3.821994               | -0.581969 | -0.008309 |
| 18               | 6                | 0              | -4.633768               | -1.604164 | 0.626356  |
| 19               | 1                | 0              | -5.598562               | -1.667687 | 0.123921  |
| 20               | 1                | 0              | -4.134110               | -2.568704 | 0.523495  |
| 21               | 1                | 0              | -4.799227               | -1.409150 | 1.690868  |
| 22               | 8                | 0              | -1.364726               | 2.771002  | -0.473210 |
| 23               | 8                | 0              | 3.923732                | -0.860444 | -0.133890 |
| 24               | 6                | 0              | 4.869157                | -0.021235 | 0.493287  |
| 25               | 1                | 0              | 4.668671                | 0.069542  | 1.565716  |
| 26               | 1                | 0              | 5.837973                | -0.493523 | 0.345554  |
| 27               | 1                | 0              | 4.877246                | 0.975090  | 0.039599  |

**Structure 32d (CHCl<sub>3</sub>)**

Energy (Hartrees): -632.086944133

No imaginary frequencies

Standard orientation:

| Center<br>Number | Atomic<br>Number | Atomic<br>Type | Coordinates (Angstroms) |           |           |
|------------------|------------------|----------------|-------------------------|-----------|-----------|
|                  |                  |                | X                       | Y         | Z         |
| 1                | 6                | 0              | 2.170322                | 0.683660  | 0.510007  |
| 2                | 6                | 0              | 0.811156                | 0.989571  | 0.501887  |
| 3                | 6                | 0              | -0.130087               | 0.143379  | -0.089371 |
| 4                | 6                | 0              | 0.348394                | -1.028589 | -0.695151 |
| 5                | 6                | 0              | 1.694892                | -1.354733 | -0.683560 |
| 6                | 6                | 0              | 2.617699                | -0.498060 | -0.080361 |
| 7                | 1                | 0              | 2.861535                | 1.369634  | 0.981736  |
| 8                | 1                | 0              | 0.481849                | 1.908447  | 0.970590  |
| 9                | 1                | 0              | -0.346159               | -1.690818 | -1.201664 |
| 10               | 1                | 0              | 2.055608                | -2.261322 | -1.155795 |
| 11               | 6                | 0              | -1.579613               | 0.454149  | -0.065856 |
| 12               | 6                | 0              | -2.478376               | -0.569329 | 0.140921  |
| 13               | 1                | 0              | -2.081157               | -1.545823 | 0.412364  |
| 14               | 6                | 0              | -2.051448               | 1.810029  | -0.236196 |
| 15               | 1                | 0              | -3.138366               | 1.960153  | -0.090983 |
| 16               | 1                | 0              | -4.284657               | 0.287482  | -0.255501 |
| 17               | 7                | 0              | -3.813655               | -0.558792 | 0.031216  |
| 18               | 6                | 0              | -4.652685               | -1.637005 | 0.525546  |
| 19               | 1                | 0              | -5.517601               | -1.755023 | -0.126806 |
| 20               | 1                | 0              | -4.081245               | -2.565717 | 0.518562  |
| 21               | 1                | 0              | -4.998800               | -1.444402 | 1.544648  |
| 22               | 8                | 0              | -1.365011               | 2.787475  | -0.494184 |
| 23               | 8                | 0              | 3.918817                | -0.891513 | -0.123257 |
| 24               | 6                | 0              | 4.890754                | -0.012531 | 0.417416  |
| 25               | 1                | 0              | 4.730281                | 0.146169  | 1.487814  |
| 26               | 1                | 0              | 5.853329                | -0.498004 | 0.267143  |
| 27               | 1                | 0              | 4.884470                | 0.949853  | -0.102796 |

**Structure 32d (DMSO)**

Energy (Hartrees): -632.088672113

No imaginary frequencies

Standard orientation:

| Center<br>Number | Atomic<br>Number | Atomic<br>Type | Coordinates (Angstroms) |           |           |
|------------------|------------------|----------------|-------------------------|-----------|-----------|
|                  |                  |                | X                       | Y         | Z         |
| 1                | 6                | 0              | 2.167047                | 0.675783  | 0.523685  |
| 2                | 6                | 0              | 0.805327                | 0.972476  | 0.523935  |
| 3                | 6                | 0              | -0.131186               | 0.146145  | -0.102759 |
| 4                | 6                | 0              | 0.354682                | -1.000087 | -0.750291 |
| 5                | 6                | 0              | 1.704623                | -1.316379 | -0.751058 |
| 6                | 6                | 0              | 2.623144                | -0.478782 | -0.114072 |
| 7                | 1                | 0              | 2.853261                | 1.344900  | 1.026571  |
| 8                | 1                | 0              | 0.469894                | 1.868564  | 1.031920  |
| 9                | 1                | 0              | -0.336799               | -1.653724 | -1.272487 |
| 10               | 1                | 0              | 2.067028                | -2.206403 | -1.253306 |
| 11               | 6                | 0              | -1.581547               | 0.454922  | -0.067888 |
| 12               | 6                | 0              | -2.477809               | -0.574704 | 0.148710  |
| 13               | 1                | 0              | -2.073190               | -1.555393 | 0.393959  |
| 14               | 6                | 0              | -2.054491               | 1.805665  | -0.246623 |
| 15               | 1                | 0              | -3.141778               | 1.952982  | -0.108041 |
| 16               | 1                | 0              | -4.289543               | 0.298329  | -0.161648 |
| 17               | 7                | 0              | -3.810146               | -0.557541 | 0.083477  |
| 18               | 6                | 0              | -4.643420               | -1.657514 | 0.539818  |
| 19               | 1                | 0              | -5.472932               | -1.800622 | -0.152836 |
| 20               | 1                | 0              | -4.046328               | -2.569017 | 0.569228  |
| 21               | 1                | 0              | -5.043161               | -1.463692 | 1.538546  |
| 22               | 8                | 0              | -1.370419               | 2.784541  | -0.519174 |
| 23               | 8                | 0              | 3.925749                | -0.859261 | -0.170525 |
| 24               | 6                | 0              | 4.874099                | -0.051420 | 0.510297  |
| 25               | 1                | 0              | 4.655062                | -0.004593 | 1.581126  |
| 26               | 1                | 0              | 5.841046                | -0.528435 | 0.360787  |
| 27               | 1                | 0              | 4.903006                | 0.961021  | 0.096907  |

**Structure 32d (C<sub>2</sub>H<sub>5</sub>OH)**

Energy (Hartrees): -632.092460920

No imaginary frequencies

Standard orientation:

| Center<br>Number | Atomic<br>Number | Atomic<br>Type | Coordinates (Angstroms) |           |           |
|------------------|------------------|----------------|-------------------------|-----------|-----------|
|                  |                  |                | X                       | Y         | Z         |
| 1                | 6                | 0              | 2.162437                | 0.659057  | 0.557288  |
| 2                | 6                | 0              | 0.800777                | 0.955336  | 0.563618  |
| 3                | 6                | 0              | -0.131739               | 0.151769  | -0.097073 |
| 4                | 6                | 0              | 0.353591                | -0.972700 | -0.780659 |
| 5                | 6                | 0              | 1.703282                | -1.289302 | -0.787371 |
| 6                | 6                | 0              | 2.616895                | -0.472574 | -0.119127 |
| 7                | 1                | 0              | 2.847569                | 1.308133  | 1.087032  |
| 8                | 1                | 0              | 0.463684                | 1.829707  | 1.108738  |
| 9                | 1                | 0              | -0.337755               | -1.607255 | -1.326226 |
| 10               | 1                | 0              | 2.068620                | -2.162175 | -1.317272 |
| 11               | 6                | 0              | -1.582955               | 0.460887  | -0.062857 |
| 12               | 6                | 0              | -2.478955               | -0.572053 | 0.163148  |
| 13               | 1                | 0              | -2.069249               | -1.546142 | 0.425407  |
| 14               | 6                | 0              | -2.053938               | 1.799848  | -0.254593 |
| 15               | 1                | 0              | -3.137691               | 1.958628  | -0.118591 |
| 16               | 1                | 0              | -4.289374               | 0.286589  | -0.179449 |
| 17               | 7                | 0              | -3.806874               | -0.561155 | 0.089011  |
| 18               | 6                | 0              | -4.640264               | -1.663864 | 0.542337  |
| 19               | 1                | 0              | -5.459646               | -1.815815 | -0.160170 |
| 20               | 1                | 0              | -4.039072               | -2.571880 | 0.586698  |
| 21               | 1                | 0              | -5.053974               | -1.463076 | 1.533623  |
| 22               | 8                | 0              | -1.361955               | 2.780031  | -0.540165 |
| 23               | 8                | 0              | 3.923976                | -0.854387 | -0.183516 |
| 24               | 6                | 0              | 4.876727                | -0.065971 | 0.517937  |
| 25               | 1                | 0              | 4.657570                | -0.048891 | 1.589204  |
| 26               | 1                | 0              | 5.841257                | -0.542920 | 0.353107  |
| 27               | 1                | 0              | 4.904858                | 0.955425  | 0.128383  |

**Structure 32e (vacuum)**

Energy (Hartrees): -632.061674106

No imaginary frequencies

Standard orientation:

| Center<br>Number | Atomic<br>Number | Atomic<br>Type | Coordinates (Angstroms) |           |           |
|------------------|------------------|----------------|-------------------------|-----------|-----------|
|                  |                  |                | X                       | Y         | Z         |
| 1                | 6                | 0              | 2.124069                | 0.786910  | 0.417435  |
| 2                | 6                | 0              | 0.744441                | 0.963853  | 0.461627  |
| 3                | 6                | 0              | -0.132703               | -0.019614 | 0.003429  |
| 4                | 6                | 0              | 0.426322                | -1.188184 | -0.531215 |
| 5                | 6                | 0              | 1.796327                | -1.383955 | -0.574234 |
| 6                | 6                | 0              | 2.656095                | -0.394761 | -0.097141 |
| 7                | 1                | 0              | 2.765958                | 1.575669  | 0.785549  |
| 8                | 1                | 0              | 0.347830                | 1.889480  | 0.858128  |
| 9                | 1                | 0              | -0.227695               | -1.949627 | -0.943267 |
| 10               | 1                | 0              | 2.225883                | -2.286146 | -0.992150 |
| 11               | 6                | 0              | -1.606002               | 0.145215  | 0.093291  |
| 12               | 6                | 0              | -2.341066               | -0.926685 | 0.518314  |
| 13               | 1                | 0              | -1.780717               | -1.773753 | 0.907444  |
| 14               | 6                | 0              | -2.199285               | 1.454034  | -0.183895 |
| 15               | 1                | 0              | -3.272754               | 1.557394  | 0.047509  |
| 16               | 1                | 0              | -3.970937               | -2.012369 | 0.953763  |
| 17               | 7                | 0              | -3.677987               | -1.153222 | 0.521879  |
| 18               | 6                | 0              | -4.693845               | -0.420544 | -0.206742 |
| 19               | 1                | 0              | -5.525833               | -1.092710 | -0.416706 |
| 20               | 1                | 0              | -5.075786               | 0.438098  | 0.351053  |
| 21               | 1                | 0              | -4.279592               | -0.067783 | -1.154956 |
| 22               | 8                | 0              | -1.591087               | 2.423292  | -0.584702 |
| 23               | 8                | 0              | 3.986166                | -0.666383 | -0.184354 |
| 24               | 6                | 0              | 4.887607                | 0.323220  | 0.262674  |
| 25               | 1                | 0              | 4.747617                | 0.534614  | 1.327714  |
| 26               | 1                | 0              | 5.884466                | -0.082234 | 0.103338  |
| 27               | 1                | 0              | 4.775080                | 1.249718  | -0.309378 |

**Structure 32e (CHCl<sub>3</sub>)**

Energy (Hartrees): -632.085087469

No imaginary frequencies

Standard orientation:

| Center<br>Number | Atomic<br>Number | Atomic<br>Type | Coordinates (Angstroms) |           |           |
|------------------|------------------|----------------|-------------------------|-----------|-----------|
|                  |                  |                | X                       | Y         | Z         |
| 1                | 6                | 0              | 2.126907                | 0.780458  | 0.436454  |
| 2                | 6                | 0              | 0.746018                | 0.954124  | 0.482202  |
| 3                | 6                | 0              | -0.133898               | -0.015605 | -0.004109 |
| 4                | 6                | 0              | 0.426815                | -1.172574 | -0.563505 |
| 5                | 6                | 0              | 1.798574                | -1.366516 | -0.608793 |
| 6                | 6                | 0              | 2.659469                | -0.388862 | -0.107460 |
| 7                | 1                | 0              | 2.769752                | 1.557555  | 0.828314  |
| 8                | 1                | 0              | 0.349382                | 1.865749  | 0.912236  |
| 9                | 1                | 0              | -0.225805               | -1.930186 | -0.985322 |
| 10               | 1                | 0              | 2.223946                | -2.263436 | -1.044280 |
| 11               | 6                | 0              | -1.608690               | 0.151353  | 0.086864  |
| 12               | 6                | 0              | -2.345546               | -0.934024 | 0.509092  |
| 13               | 1                | 0              | -1.781806               | -1.778926 | 0.898028  |
| 14               | 6                | 0              | -2.200598               | 1.443717  | -0.200487 |
| 15               | 1                | 0              | -3.271520               | 1.551498  | 0.027623  |
| 16               | 1                | 0              | -3.950756               | -2.041641 | 0.929378  |
| 17               | 7                | 0              | -3.665990               | -1.170292 | 0.509106  |
| 18               | 6                | 0              | -4.709410               | -0.406583 | -0.147624 |
| 19               | 1                | 0              | -5.555801               | -1.069320 | -0.324594 |
| 20               | 1                | 0              | -5.049666               | 0.438343  | 0.455898  |
| 21               | 1                | 0              | -4.345230               | -0.033860 | -1.108594 |
| 22               | 8                | 0              | -1.594511               | 2.418682  | -0.621907 |
| 23               | 8                | 0              | 3.989394                | -0.657761 | -0.195948 |
| 24               | 6                | 0              | 4.892922                | 0.313916  | 0.302775  |
| 25               | 1                | 0              | 4.737038                | 0.487212  | 1.371931  |
| 26               | 1                | 0              | 5.890148                | -0.093643 | 0.146464  |
| 27               | 1                | 0              | 4.797810                | 1.258918  | -0.240429 |



**Structure 32e (DMSO)**

Energy (Hartrees): -632.086839648

No imaginary frequencies

Standard orientation:

| Center<br>Number | Atomic<br>Number | Atomic<br>Type | Coordinates (Angstroms) |           |           |
|------------------|------------------|----------------|-------------------------|-----------|-----------|
|                  |                  |                | X                       | Y         | Z         |
| 1                | 6                | 0              | 2.122597                | 0.772016  | 0.453354  |
| 2                | 6                | 0              | 0.740011                | 0.939614  | 0.489894  |
| 3                | 6                | 0              | -0.135016               | -0.024415 | -0.017952 |
| 4                | 6                | 0              | 0.434984                | -1.173284 | -0.585752 |
| 5                | 6                | 0              | 1.808523                | -1.362418 | -0.621289 |
| 6                | 6                | 0              | 2.664416                | -0.388780 | -0.101484 |
| 7                | 1                | 0              | 2.759007                | 1.545222  | 0.863685  |
| 8                | 1                | 0              | 0.338269                | 1.843178  | 0.932296  |
| 9                | 1                | 0              | -0.210096               | -1.932364 | -1.016827 |
| 10               | 1                | 0              | 2.235917                | -2.256446 | -1.061314 |
| 11               | 6                | 0              | -1.611316               | 0.144694  | 0.062320  |
| 12               | 6                | 0              | -2.351359               | -0.956305 | 0.451724  |
| 13               | 1                | 0              | -1.783607               | -1.819865 | 0.790340  |
| 14               | 6                | 0              | -2.190524               | 1.439882  | -0.228855 |
| 15               | 1                | 0              | -3.262937               | 1.555903  | -0.021163 |
| 16               | 1                | 0              | -3.941823               | -2.086736 | 0.849416  |
| 17               | 7                | 0              | -3.666311               | -1.191426 | 0.472618  |
| 18               | 6                | 0              | -4.735222               | -0.357437 | -0.040948 |
| 19               | 1                | 0              | -5.625236               | -0.976269 | -0.143373 |
| 20               | 1                | 0              | -4.963408               | 0.474171  | 0.630102  |
| 21               | 1                | 0              | -4.461615               | 0.038623  | -1.022737 |
| 22               | 8                | 0              | -1.572150               | 2.411232  | -0.648587 |
| 23               | 8                | 0              | 3.994471                | -0.650530 | -0.180789 |
| 24               | 6                | 0              | 4.886988                | 0.327876  | 0.331183  |
| 25               | 1                | 0              | 4.720809                | 0.495029  | 1.399446  |
| 26               | 1                | 0              | 5.889059                | -0.069595 | 0.180918  |
| 27               | 1                | 0              | 4.786775                | 1.274862  | -0.207283 |

**Structure 32e (C<sub>2</sub>H<sub>5</sub>OH)**

Energy (Hartrees): -632.090821326

No imaginary frequencies

Standard orientation:

| Center<br>Number | Atomic<br>Number | Atomic<br>Type | Coordinates (Angstroms) |           |           |
|------------------|------------------|----------------|-------------------------|-----------|-----------|
|                  |                  |                | X                       | Y         | Z         |
| 1                | 6                | 0              | -2.121730               | 0.759324  | -0.484838 |
| 2                | 6                | 0              | -0.739642               | 0.927851  | -0.526626 |
| 3                | 6                | 0              | 0.135260                | -0.018244 | 0.013285  |
| 4                | 6                | 0              | -0.429779               | -1.151646 | 0.614322  |
| 5                | 6                | 0              | -1.802826               | -1.341950 | 0.655614  |
| 6                | 6                | 0              | -2.657502               | -0.384719 | 0.106487  |
| 7                | 1                | 0              | -2.760770               | 1.517287  | -0.918815 |
| 8                | 1                | 0              | -0.338839               | 1.815901  | -1.001815 |
| 9                | 1                | 0              | 0.218606                | -1.895549 | 1.066561  |
| 10               | 1                | 0              | -2.231090               | -2.222393 | 1.121796  |
| 11               | 6                | 0              | 1.612063                | 0.151255  | -0.067596 |
| 12               | 6                | 0              | 2.350082                | -0.947409 | -0.478618 |
| 13               | 1                | 0              | 1.779156                | -1.798614 | -0.842315 |
| 14               | 6                | 0              | 2.193239                | 1.429931  | 0.241562  |
| 15               | 1                | 0              | 3.264825                | 1.552100  | 0.042576  |
| 16               | 1                | 0              | 3.936813                | -2.073295 | -0.890587 |
| 17               | 7                | 0              | 3.660761                | -1.186422 | -0.493658 |
| 18               | 6                | 0              | 4.727630                | -0.369084 | 0.052538  |
| 19               | 1                | 0              | 5.611618                | -0.995802 | 0.157837  |
| 20               | 1                | 0              | 4.972329                | 0.472338  | -0.599916 |
| 21               | 1                | 0              | 4.439889                | 0.009174  | 1.037054  |
| 22               | 8                | 0              | 1.571723                | 2.404232  | 0.674573  |
| 23               | 8                | 0              | -3.991908               | -0.648230 | 0.194445  |
| 24               | 6                | 0              | -4.891436               | 0.316148  | -0.337359 |
| 25               | 1                | 0              | -4.729378               | 0.454519  | -1.409929 |
| 26               | 1                | 0              | -5.890725               | -0.081929 | -0.170839 |
| 27               | 1                | 0              | -4.788450               | 1.274467  | 0.179231  |

**Structure 32f (vacuum)**

Energy (Hartrees): -632.064678260

No imaginary frequencies

Standard orientation:

| Center<br>Number | Atomic<br>Number | Atomic<br>Type | Coordinates (Angstroms) |           |           |
|------------------|------------------|----------------|-------------------------|-----------|-----------|
|                  |                  |                | X                       | Y         | Z         |
| 1                | 6                | 0              | 2.203775                | 0.909160  | 0.265560  |
| 2                | 6                | 0              | 0.817336                | 1.042888  | 0.302527  |
| 3                | 6                | 0              | -0.034993               | -0.015980 | -0.014757 |
| 4                | 6                | 0              | 0.560300                | -1.233927 | -0.377578 |
| 5                | 6                | 0              | 1.934533                | -1.390963 | -0.398371 |
| 6                | 6                | 0              | 2.767849                | -0.316686 | -0.080233 |
| 7                | 1                | 0              | 2.821925                | 1.758313  | 0.524414  |
| 8                | 1                | 0              | 0.396855                | 1.993133  | 0.613946  |
| 9                | 1                | 0              | -0.071636               | -2.065543 | -0.670674 |
| 10               | 1                | 0              | 2.391787                | -2.331910 | -0.679433 |
| 11               | 6                | 0              | -1.508123               | 0.139868  | 0.037587  |
| 12               | 6                | 0              | -2.248695               | -0.859252 | 0.614749  |
| 13               | 1                | 0              | -1.706204               | -1.621882 | 1.170547  |
| 14               | 6                | 0              | -2.064729               | 1.415606  | -0.405402 |
| 15               | 1                | 0              | -1.376513               | 2.015957  | -1.031588 |
| 16               | 1                | 0              | -3.912719               | -1.839809 | 1.135317  |
| 17               | 7                | 0              | -3.575527               | -1.078127 | 0.571571  |
| 18               | 6                | 0              | -4.506322               | -0.526466 | -0.396575 |
| 19               | 1                | 0              | -5.332338               | -1.228454 | -0.509718 |
| 20               | 1                | 0              | -4.875500               | 0.454103  | -0.098391 |
| 21               | 1                | 0              | -3.996784               | -0.416548 | -1.357203 |
| 22               | 8                | 0              | -3.150866               | 1.871667  | -0.102245 |
| 23               | 8                | 0              | 4.103846                | -0.561355 | -0.139209 |
| 24               | 6                | 0              | 4.979490                | 0.507599  | 0.148454  |
| 25               | 1                | 0              | 5.986368                | 0.111406  | 0.036937  |
| 26               | 1                | 0              | 4.834530                | 1.336269  | -0.552120 |
| 27               | 1                | 0              | 4.842543                | 0.868270  | 1.172830  |

**Structure 32f (CHCl<sub>3</sub>)**

Energy (Hartrees): -632.085194200

No imaginary frequencies

Standard orientation:

| Center<br>Number | Atomic<br>Number | Atomic<br>Type | Coordinates (Angstroms) |           |           |
|------------------|------------------|----------------|-------------------------|-----------|-----------|
|                  |                  |                | X                       | Y         | Z         |
| 1                | 6                | 0              | 2.206656                | 0.914663  | 0.242226  |
| 2                | 6                | 0              | 0.819883                | 1.051989  | 0.280832  |
| 3                | 6                | 0              | -0.038405               | -0.011512 | -0.012692 |
| 4                | 6                | 0              | 0.553953                | -1.239651 | -0.349332 |
| 5                | 6                | 0              | 1.929083                | -1.399596 | -0.370772 |
| 6                | 6                | 0              | 2.767074                | -0.320447 | -0.078482 |
| 7                | 1                | 0              | 2.828802                | 1.766609  | 0.483601  |
| 8                | 1                | 0              | 0.404930                | 2.010601  | 0.574858  |
| 9                | 1                | 0              | -0.076929               | -2.080765 | -0.617892 |
| 10               | 1                | 0              | 2.378411                | -2.351248 | -0.630963 |
| 11               | 6                | 0              | -1.512079               | 0.148418  | 0.042989  |
| 12               | 6                | 0              | -2.257736               | -0.860033 | 0.617561  |
| 13               | 1                | 0              | -1.724678               | -1.616650 | 1.190015  |
| 14               | 6                | 0              | -2.064180               | 1.420585  | -0.382997 |
| 15               | 1                | 0              | -1.384656               | 2.026358  | -1.011450 |
| 16               | 1                | 0              | -3.914999               | -1.860682 | 1.095976  |
| 17               | 7                | 0              | -3.573044               | -1.086742 | 0.546461  |
| 18               | 6                | 0              | -4.495053               | -0.534199 | -0.428295 |
| 19               | 1                | 0              | -5.306937               | -1.248224 | -0.563742 |
| 20               | 1                | 0              | -4.892250               | 0.431769  | -0.116671 |
| 21               | 1                | 0              | -3.974856               | -0.396976 | -1.379811 |
| 22               | 8                | 0              | -3.150527               | 1.886694  | -0.064855 |
| 23               | 8                | 0              | 4.102025                | -0.568824 | -0.132216 |
| 24               | 6                | 0              | 4.986013                | 0.508094  | 0.130034  |
| 25               | 1                | 0              | 5.991117                | 0.103274  | 0.026310  |
| 26               | 1                | 0              | 4.845989                | 1.318650  | -0.591631 |
| 27               | 1                | 0              | 4.854133                | 0.891651  | 1.146304  |

**Structure 32f (DMSO)**

Energy (Hartrees): -632.085480567

No imaginary frequencies

Standard orientation:

| Center<br>Number | Atomic<br>Number | Atomic<br>Type | Coordinates (Angstroms) |           |           |
|------------------|------------------|----------------|-------------------------|-----------|-----------|
|                  |                  |                | X                       | Y         | Z         |
| 1                | 6                | 0              | 2.209352                | 0.917297  | 0.225560  |
| 2                | 6                | 0              | 0.822585                | 1.057041  | 0.272842  |
| 3                | 6                | 0              | -0.040841               | -0.010260 | 0.005274  |
| 4                | 6                | 0              | 0.548301                | -1.246429 | -0.310091 |
| 5                | 6                | 0              | 1.923469                | -1.408318 | -0.338945 |
| 6                | 6                | 0              | 2.766945                | -0.324505 | -0.077093 |
| 7                | 1                | 0              | 2.833433                | 1.773976  | 0.444961  |
| 8                | 1                | 0              | 0.413806                | 2.023309  | 0.550020  |
| 9                | 1                | 0              | -0.084647               | -2.093672 | -0.553772 |
| 10               | 1                | 0              | 2.365582                | -2.367927 | -0.582661 |
| 11               | 6                | 0              | -1.514052               | 0.152298  | 0.058885  |
| 12               | 6                | 0              | -2.265221               | -0.865917 | 0.615851  |
| 13               | 1                | 0              | -1.741742               | -1.628192 | 1.189457  |
| 14               | 6                | 0              | -2.062762               | 1.427151  | -0.358173 |
| 15               | 1                | 0              | -1.381654               | 2.034488  | -0.983541 |
| 16               | 1                | 0              | -3.924202               | -1.881622 | 1.045434  |
| 17               | 7                | 0              | -3.575888               | -1.092596 | 0.519522  |
| 18               | 6                | 0              | -4.478412               | -0.532993 | -0.468539 |
| 19               | 1                | 0              | -5.285532               | -1.247431 | -0.625587 |
| 20               | 1                | 0              | -4.884591               | 0.429061  | -0.156028 |
| 21               | 1                | 0              | -3.938767               | -0.384409 | -1.407845 |
| 22               | 8                | 0              | -3.147365               | 1.898176  | -0.037056 |
| 23               | 8                | 0              | 4.099763                | -0.572827 | -0.140928 |
| 24               | 6                | 0              | 4.983678                | 0.511217  | 0.103915  |
| 25               | 1                | 0              | 5.989500                | 0.107967  | 0.001623  |
| 26               | 1                | 0              | 4.838585                | 1.312312  | -0.626783 |
| 27               | 1                | 0              | 4.854011                | 0.908034  | 1.115024  |

**Structure 32f (C<sub>2</sub>H<sub>5</sub>OH)**

Energy (Hartrees): -632.089112465

No imaginary frequencies

Standard orientation:

| Center<br>Number | Atomic<br>Number | Atomic<br>Type | Coordinates (Angstroms) |           |           |
|------------------|------------------|----------------|-------------------------|-----------|-----------|
|                  |                  |                | X                       | Y         | Z         |
| 1                | 6                | 0              | 2.212931                | 0.919538  | 0.228677  |
| 2                | 6                | 0              | 0.827302                | 1.066130  | 0.279833  |
| 3                | 6                | 0              | -0.040526               | 0.002910  | 0.011212  |
| 4                | 6                | 0              | 0.539868                | -1.236175 | -0.306614 |
| 5                | 6                | 0              | 1.914238                | -1.404975 | -0.338865 |
| 6                | 6                | 0              | 2.760465                | -0.324716 | -0.077359 |
| 7                | 1                | 0              | 2.843324                | 1.771473  | 0.448333  |
| 8                | 1                | 0              | 0.423085                | 2.033128  | 0.561065  |
| 9                | 1                | 0              | -0.098481               | -2.079535 | -0.550196 |
| 10               | 1                | 0              | 2.352884                | -2.366041 | -0.584208 |
| 11               | 6                | 0              | -1.513509               | 0.168810  | 0.065869  |
| 12               | 6                | 0              | -2.263916               | -0.847287 | 0.638374  |
| 13               | 1                | 0              | -1.742047               | -1.586165 | 1.243283  |
| 14               | 6                | 0              | -2.064728               | 1.430573  | -0.353267 |
| 15               | 1                | 0              | -1.383300               | 2.054525  | -0.958171 |
| 16               | 1                | 0              | -3.917833               | -1.866353 | 1.068033  |
| 17               | 7                | 0              | -3.565976               | -1.091666 | 0.522421  |
| 18               | 6                | 0              | -4.461848               | -0.562676 | -0.489869 |
| 19               | 1                | 0              | -5.223883               | -1.316172 | -0.686186 |
| 20               | 1                | 0              | -4.937074               | 0.366617  | -0.175071 |
| 21               | 1                | 0              | -3.898485               | -0.369229 | -1.405742 |
| 22               | 8                | 0              | -3.169557               | 1.888051  | -0.050833 |
| 23               | 8                | 0              | 4.097126                | -0.581014 | -0.143988 |
| 24               | 6                | 0              | 4.991953                | 0.498530  | 0.091484  |
| 25               | 1                | 0              | 5.993278                | 0.085992  | -0.018308 |
| 26               | 1                | 0              | 4.844983                | 1.297030  | -0.641178 |
| 27               | 1                | 0              | 4.871445                | 0.896114  | 1.103130  |

**Structure 32g (vacuum)**

Energy (Hartrees): -632.069047103

No imaginary frequencies

Standard orientation:

| Center<br>Number | Atomic<br>Number | Atomic<br>Type | Coordinates (Angstroms) |           |           |
|------------------|------------------|----------------|-------------------------|-----------|-----------|
|                  |                  |                | X                       | Y         | Z         |
| 1                | 6                | 0              | 1.892896                | -1.251395 | -0.703800 |
| 2                | 6                | 0              | 0.532930                | -1.002588 | -0.704837 |
| 3                | 6                | 0              | 0.000700                | 0.147566  | -0.103468 |
| 4                | 6                | 0              | 0.891446                | 1.031617  | 0.500744  |
| 5                | 6                | 0              | 2.267223                | 0.804966  | 0.496453  |
| 6                | 6                | 0              | 2.771964                | -0.344855 | -0.105161 |
| 7                | 1                | 0              | 2.306287                | -2.136704 | -1.171136 |
| 8                | 1                | 0              | -0.131931               | -1.702287 | -1.200555 |
| 9                | 1                | 0              | 0.505637                | 1.910901  | 1.005006  |
| 10               | 1                | 0              | 2.921242                | 1.518997  | 0.978388  |
| 11               | 6                | 0              | -1.456906               | 0.406558  | -0.115615 |
| 12               | 6                | 0              | -1.948412               | 1.635288  | -0.424980 |
| 13               | 1                | 0              | -1.287147               | 2.454019  | -0.695438 |
| 14               | 6                | 0              | -2.382063               | -0.667912 | 0.213121  |
| 15               | 1                | 0              | -1.943418               | -1.636527 | 0.487428  |
| 16               | 7                | 0              | -3.651308               | -0.506495 | 0.209698  |
| 17               | 6                | 0              | -4.500324               | -1.621189 | 0.575464  |
| 18               | 1                | 0              | -5.108879               | -1.346260 | 1.439951  |
| 19               | 1                | 0              | -5.182929               | -1.843912 | -0.247648 |
| 20               | 1                | 0              | -3.925217               | -2.522811 | 0.817450  |
| 21               | 8                | 0              | -3.229665               | 1.956513  | -0.445312 |
| 22               | 1                | 0              | -3.737995               | 1.129265  | -0.204468 |
| 23               | 8                | 0              | 4.089917                | -0.672891 | -0.156560 |
| 24               | 6                | 0              | 5.009878                | 0.218669  | 0.436312  |
| 25               | 1                | 0              | 4.821019                | 0.326285  | 1.509230  |
| 26               | 1                | 0              | 5.994510                | -0.217892 | 0.284613  |
| 27               | 1                | 0              | 4.969981                | 1.203054  | -0.041125 |

**Structure 32g (CHCl<sub>3</sub>)**

Energy (Hartrees): -632.084725068

No imaginary frequencies

Standard orientation:

| Center<br>Number | Atomic<br>Number | Atomic<br>Type | Coordinates (Angstroms) |           |           |
|------------------|------------------|----------------|-------------------------|-----------|-----------|
|                  |                  |                | X                       | Y         | Z         |
| 1                | 6                | 0              | 1.884889                | -1.286471 | -0.640834 |
| 2                | 6                | 0              | 0.524680                | -1.031776 | -0.643492 |
| 3                | 6                | 0              | 0.002212                | 0.147924  | -0.091175 |
| 4                | 6                | 0              | 0.903639                | 1.056369  | 0.463893  |
| 5                | 6                | 0              | 2.278386                | 0.822801  | 0.459909  |
| 6                | 6                | 0              | 2.773619                | -0.357578 | -0.091156 |
| 7                | 1                | 0              | 2.285134                | -2.197499 | -1.070767 |
| 8                | 1                | 0              | -0.144640               | -1.754076 | -1.099393 |
| 9                | 1                | 0              | 0.529747                | 1.963107  | 0.927622  |
| 10               | 1                | 0              | 2.940596                | 1.555002  | 0.902698  |
| 11               | 6                | 0              | -1.455635               | 0.410954  | -0.104867 |
| 12               | 6                | 0              | -1.944991               | 1.642843  | -0.403064 |
| 13               | 1                | 0              | -1.290278               | 2.470567  | -0.662427 |
| 14               | 6                | 0              | -2.385835               | -0.667813 | 0.207731  |
| 15               | 1                | 0              | -1.958009               | -1.640181 | 0.479622  |
| 16               | 7                | 0              | -3.654365               | -0.497301 | 0.191330  |
| 17               | 6                | 0              | -4.516826               | -1.611005 | 0.533774  |
| 18               | 1                | 0              | -5.150759               | -1.333402 | 1.379235  |
| 19               | 1                | 0              | -5.174933               | -1.833129 | -0.309823 |
| 20               | 1                | 0              | -3.949129               | -2.511490 | 0.792856  |
| 21               | 8                | 0              | -3.233410               | 1.953580  | -0.423604 |
| 22               | 1                | 0              | -3.733414               | 1.109464  | -0.194601 |
| 23               | 8                | 0              | 4.089084                | -0.693411 | -0.133960 |
| 24               | 6                | 0              | 5.025226                | 0.237453  | 0.383223  |
| 25               | 1                | 0              | 4.857722                | 0.416149  | 1.449517  |
| 26               | 1                | 0              | 6.006453                | -0.212693 | 0.243881  |
| 27               | 1                | 0              | 4.980487                | 1.185736  | -0.160874 |

**Structure 32g (DMSO)**

Energy (Hartrees): -632.083281951

No imaginary frequencies

Standard orientation:

| Center<br>Number | Atomic<br>Number | Atomic<br>Type | Coordinates (Angstroms) |           |           |
|------------------|------------------|----------------|-------------------------|-----------|-----------|
|                  |                  |                | X                       | Y         | Z         |
| 1                | 6                | 0              | 1.884278                | -1.302194 | -0.617212 |
| 2                | 6                | 0              | 0.523207                | -1.048246 | -0.618414 |
| 3                | 6                | 0              | 0.003221                | 0.143649  | -0.089614 |
| 4                | 6                | 0              | 0.908045                | 1.064392  | 0.441076  |
| 5                | 6                | 0              | 2.282923                | 0.830787  | 0.435815  |
| 6                | 6                | 0              | 2.776842                | -0.361870 | -0.091936 |
| 7                | 1                | 0              | 2.278138                | -2.224245 | -1.029812 |
| 8                | 1                | 0              | -0.147205               | -1.782931 | -1.052437 |
| 9                | 1                | 0              | 0.538073                | 1.983043  | 0.884579  |
| 10               | 1                | 0              | 2.946378                | 1.573268  | 0.859422  |
| 11               | 6                | 0              | -1.454420               | 0.408119  | -0.103207 |
| 12               | 6                | 0              | -1.941250               | 1.643846  | -0.393048 |
| 13               | 1                | 0              | -1.284781               | 2.472999  | -0.643850 |
| 14               | 6                | 0              | -2.388462               | -0.670197 | 0.201342  |
| 15               | 1                | 0              | -1.968881               | -1.648553 | 0.461939  |
| 16               | 7                | 0              | -3.656318               | -0.489336 | 0.188194  |
| 17               | 6                | 0              | -4.527123               | -1.600502 | 0.521764  |
| 18               | 1                | 0              | -5.162349               | -1.323574 | 1.366574  |
| 19               | 1                | 0              | -5.183879               | -1.814064 | -0.325241 |
| 20               | 1                | 0              | -3.964214               | -2.504513 | 0.777267  |
| 21               | 8                | 0              | -3.229713               | 1.953091  | -0.412782 |
| 22               | 1                | 0              | -3.724666               | 1.101300  | -0.187154 |
| 23               | 8                | 0              | 4.091197                | -0.695399 | -0.133033 |
| 24               | 6                | 0              | 5.023204                | 0.244497  | 0.381895  |
| 25               | 1                | 0              | 4.847261                | 0.433260  | 1.444868  |
| 26               | 1                | 0              | 6.006756                | -0.203442 | 0.252825  |
| 27               | 1                | 0              | 4.978935                | 1.187591  | -0.170579 |

**Structure 32g (C<sub>2</sub>H<sub>5</sub>OH)**

Energy (Hartrees): -632.085059759

No imaginary frequencies

Standard orientation:

| Center<br>Number | Atomic<br>Number | Atomic<br>Type | Coordinates (Angstroms) |           |           |
|------------------|------------------|----------------|-------------------------|-----------|-----------|
|                  |                  |                | X                       | Y         | Z         |
| 1                | 6                | 0              | 1.883111                | -1.297858 | -0.625227 |
| 2                | 6                | 0              | 0.521953                | -1.043755 | -0.627194 |
| 3                | 6                | 0              | 0.002587                | 0.144583  | -0.090752 |
| 4                | 6                | 0              | 0.905648                | 1.061612  | 0.449140  |
| 5                | 6                | 0              | 2.280292                | 0.827801  | 0.445094  |
| 6                | 6                | 0              | 2.771997                | -0.360463 | -0.091415 |
| 7                | 1                | 0              | 2.279919                | -2.216385 | -1.043432 |
| 8                | 1                | 0              | -0.148103               | -1.774570 | -1.068362 |
| 9                | 1                | 0              | 0.534481                | 1.976578  | 0.899136  |
| 10               | 1                | 0              | 2.944059                | 1.566152  | 0.875385  |
| 11               | 6                | 0              | -1.455059               | 0.410163  | -0.105552 |
| 12               | 6                | 0              | -1.937588               | 1.644700  | -0.396717 |
| 13               | 1                | 0              | -1.284088               | 2.474921  | -0.650031 |
| 14               | 6                | 0              | -2.388631               | -0.669446 | 0.202387  |
| 15               | 1                | 0              | -1.965529               | -1.644725 | 0.468533  |
| 16               | 7                | 0              | -3.656341               | -0.492248 | 0.187661  |
| 17               | 6                | 0              | -4.521669               | -1.606313 | 0.527071  |
| 18               | 1                | 0              | -5.158409               | -1.328162 | 1.370248  |
| 19               | 1                | 0              | -5.177589               | -1.827028 | -0.318647 |
| 20               | 1                | 0              | -3.955316               | -2.506622 | 0.787439  |
| 21               | 8                | 0              | -3.232001               | 1.956083  | -0.414919 |
| 22               | 1                | 0              | -3.732175               | 1.107594  | -0.188999 |
| 23               | 8                | 0              | 4.091484                | -0.695306 | -0.133127 |
| 24               | 6                | 0              | 5.027267                | 0.243287  | 0.382256  |
| 25               | 1                | 0              | 4.851937                | 0.427952  | 1.445648  |
| 26               | 1                | 0              | 6.008874                | -0.207967 | 0.249496  |
| 27               | 1                | 0              | 4.981006                | 1.185920  | -0.170223 |

**Structure 32h (vacuum)**

Energy (Hartrees): -632.045063017

No imaginary frequencies

Standard orientation:

| Center<br>Number | Atomic<br>Number | Atomic<br>Type | Coordinates (Angstroms) |           |           |
|------------------|------------------|----------------|-------------------------|-----------|-----------|
|                  |                  |                | X                       | Y         | Z         |
| 1                | 6                | 0              | 1.814404                | -1.259240 | -0.676858 |
| 2                | 6                | 0              | 0.460086                | -0.984592 | -0.647152 |
| 3                | 6                | 0              | -0.034050               | 0.190719  | -0.061286 |
| 4                | 6                | 0              | 0.887987                | 1.065554  | 0.508208  |
| 5                | 6                | 0              | 2.258591                | 0.810159  | 0.477420  |
| 6                | 6                | 0              | 2.725533                | -0.358794 | -0.117655 |
| 7                | 1                | 0              | 2.198578                | -2.163113 | -1.133610 |
| 8                | 1                | 0              | -0.234071               | -1.683314 | -1.102440 |
| 9                | 1                | 0              | 0.532697                | 1.958427  | 1.010988  |
| 10               | 1                | 0              | 2.938234                | 1.516651  | 0.934527  |
| 11               | 6                | 0              | -1.492219               | 0.466614  | -0.055412 |
| 12               | 6                | 0              | -1.923193               | 1.701636  | -0.358330 |
| 13               | 1                | 0              | -1.204585               | 2.466084  | -0.644426 |
| 14               | 6                | 0              | -2.385030               | -0.649405 | 0.308687  |
| 15               | 1                | 0              | -1.893150               | -1.461476 | 0.867635  |
| 16               | 7                | 0              | -3.616220               | -0.706545 | 0.019210  |
| 17               | 6                | 0              | -4.351269               | -1.863178 | 0.484162  |
| 18               | 1                | 0              | -4.819382               | -2.356105 | -0.371228 |
| 19               | 1                | 0              | -3.728831               | -2.590235 | 1.024249  |
| 20               | 1                | 0              | -5.158827               | -1.529726 | 1.140690  |
| 21               | 8                | 0              | -3.216140               | 2.080901  | -0.325289 |
| 22               | 1                | 0              | -3.289072               | 2.999680  | -0.590649 |
| 23               | 8                | 0              | 4.035308                | -0.713553 | -0.194849 |
| 24               | 6                | 0              | 4.986009                | 0.165331  | 0.366726  |
| 25               | 1                | 0              | 4.821700                | 0.291485  | 1.441711  |
| 26               | 1                | 0              | 5.957897                | -0.294249 | 0.201313  |
| 27               | 1                | 0              | 4.957925                | 1.144102  | -0.123179 |

**Structure 32h (CHCl<sub>3</sub>)**

Energy (Hartrees): -632.066894100

No imaginary frequencies

Standard orientation:

| Center<br>Number | Atomic<br>Number | Atomic<br>Type | Coordinates (Angstroms) |           |           |
|------------------|------------------|----------------|-------------------------|-----------|-----------|
|                  |                  |                | X                       | Y         | Z         |
| 1                | 6                | 0              | 1.800636                | -1.295361 | -0.611320 |
| 2                | 6                | 0              | 0.446445                | -1.011816 | -0.585006 |
| 3                | 6                | 0              | -0.037653               | 0.193266  | -0.052003 |
| 4                | 6                | 0              | 0.896227                | 1.092199  | 0.463530  |
| 5                | 6                | 0              | 2.264991                | 0.828337  | 0.433299  |
| 6                | 6                | 0              | 2.721901                | -0.373187 | -0.105437 |
| 7                | 1                | 0              | 2.171072                | -2.225407 | -1.027256 |
| 8                | 1                | 0              | -0.251310               | -1.731089 | -1.001833 |
| 9                | 1                | 0              | 0.554512                | 2.014837  | 0.920602  |
| 10               | 1                | 0              | 2.952778                | 1.553410  | 0.848095  |
| 11               | 6                | 0              | -1.495894               | 0.477004  | -0.048084 |
| 12               | 6                | 0              | -1.918864               | 1.721374  | -0.333626 |
| 13               | 1                | 0              | -1.201633               | 2.492566  | -0.602458 |
| 14               | 6                | 0              | -2.391103               | -0.640690 | 0.304355  |
| 15               | 1                | 0              | -1.910599               | -1.445046 | 0.880770  |
| 16               | 7                | 0              | -3.617063               | -0.716489 | -0.013451 |
| 17               | 6                | 0              | -4.345654               | -1.883425 | 0.444467  |
| 18               | 1                | 0              | -4.785988               | -2.391341 | -0.417604 |
| 19               | 1                | 0              | -3.723104               | -2.595012 | 1.002509  |
| 20               | 1                | 0              | -5.174423               | -1.561746 | 1.080938  |
| 21               | 8                | 0              | -3.207958               | 2.106940  | -0.301078 |
| 22               | 1                | 0              | -3.266020               | 3.044003  | -0.517733 |
| 23               | 8                | 0              | 4.028845                | -0.736304 | -0.173240 |
| 24               | 6                | 0              | 4.994437                | 0.176412  | 0.321764  |
| 25               | 1                | 0              | 4.846240                | 0.368589  | 1.388549  |
| 26               | 1                | 0              | 5.962492                | -0.298536 | 0.173233  |
| 27               | 1                | 0              | 4.965513                | 1.120424  | -0.230747 |

**Structure 32h (DMSO)**

Energy (Hartrees): -632.065628884

No imaginary frequencies

Standard orientation:

| Center<br>Number | Atomic<br>Number | Atomic<br>Type | Coordinates (Angstroms) |           |           |
|------------------|------------------|----------------|-------------------------|-----------|-----------|
|                  |                  |                | X                       | Y         | Z         |
| 1                | 6                | 0              | 1.786186                | -1.317176 | -0.567078 |
| 2                | 6                | 0              | 0.432766                | -1.025929 | -0.540530 |
| 3                | 6                | 0              | -0.040629               | 0.203360  | -0.055120 |
| 4                | 6                | 0              | 0.902586                | 1.119190  | 0.413791  |
| 5                | 6                | 0              | 2.269359                | 0.847028  | 0.382755  |
| 6                | 6                | 0              | 2.717069                | -0.379794 | -0.107918 |
| 7                | 1                | 0              | 2.144005                | -2.267855 | -0.946211 |
| 8                | 1                | 0              | -0.270909               | -1.761325 | -0.918066 |
| 9                | 1                | 0              | 0.571339                | 2.064446  | 0.830890  |
| 10               | 1                | 0              | 2.963427                | 1.586390  | 0.760517  |
| 11               | 6                | 0              | -1.498111               | 0.490433  | -0.045175 |
| 12               | 6                | 0              | -1.922680               | 1.737522  | -0.316808 |
| 13               | 1                | 0              | -1.208600               | 2.512129  | -0.583633 |
| 14               | 6                | 0              | -2.389971               | -0.626756 | 0.320651  |
| 15               | 1                | 0              | -1.930908               | -1.384758 | 0.971907  |
| 16               | 7                | 0              | -3.591734               | -0.752830 | -0.067775 |
| 17               | 6                | 0              | -4.322777               | -1.908420 | 0.420643  |
| 18               | 1                | 0              | -4.686722               | -2.488427 | -0.431741 |
| 19               | 1                | 0              | -3.721132               | -2.558701 | 1.067957  |
| 20               | 1                | 0              | -5.202544               | -1.569501 | 0.974631  |
| 21               | 8                | 0              | -3.211199               | 2.125221  | -0.262232 |
| 22               | 1                | 0              | -3.262399               | 3.070116  | -0.447808 |
| 23               | 8                | 0              | 4.020723                | -0.748453 | -0.169517 |
| 24               | 6                | 0              | 4.986596                | 0.172195  | 0.317545  |
| 25               | 1                | 0              | 4.826201                | 0.386616  | 1.378063  |
| 26               | 1                | 0              | 5.954519                | -0.308490 | 0.188535  |
| 27               | 1                | 0              | 4.967297                | 1.105118  | -0.253168 |

**Structure 32h (C<sub>2</sub>H<sub>5</sub>OH)**

Energy (Hartrees): -632.072677545

No imaginary frequencies

Standard orientation:

| Center<br>Number | Atomic<br>Number | Atomic<br>Type | Coordinates (Angstroms) |           |           |
|------------------|------------------|----------------|-------------------------|-----------|-----------|
|                  |                  |                | X                       | Y         | Z         |
| 1                | 6                | 0              | 1.805579                | -1.289718 | -0.634335 |
| 2                | 6                | 0              | 0.449802                | -1.009116 | -0.612163 |
| 3                | 6                | 0              | -0.038619               | 0.186190  | -0.062227 |
| 4                | 6                | 0              | 0.889963                | 1.078909  | 0.474684  |
| 5                | 6                | 0              | 2.259375                | 0.817823  | 0.449697  |
| 6                | 6                | 0              | 2.720175                | -0.374016 | -0.106180 |
| 7                | 1                | 0              | 2.178456                | -2.212924 | -1.064135 |
| 8                | 1                | 0              | -0.242994               | -1.724261 | -1.044558 |
| 9                | 1                | 0              | 0.544664                | 1.995762  | 0.940941  |
| 10               | 1                | 0              | 2.943335                | 1.538083  | 0.879275  |
| 11               | 6                | 0              | -1.497733               | 0.470986  | -0.061288 |
| 12               | 6                | 0              | -1.910509               | 1.722802  | -0.335070 |
| 13               | 1                | 0              | -1.189870               | 2.496789  | -0.583839 |
| 14               | 6                | 0              | -2.391256               | -0.649980 | 0.278691  |
| 15               | 1                | 0              | -1.896072               | -1.485269 | 0.792957  |
| 16               | 7                | 0              | -3.634966               | -0.700119 | 0.022741  |
| 17               | 6                | 0              | -4.347303               | -1.885335 | 0.465895  |
| 18               | 1                | 0              | -4.842520               | -2.348891 | -0.391258 |
| 19               | 1                | 0              | -3.697974               | -2.626242 | 0.948225  |
| 20               | 1                | 0              | -5.133464               | -1.591824 | 1.166761  |
| 21               | 8                | 0              | -3.198065               | 2.118227  | -0.315435 |
| 22               | 1                | 0              | -3.243290               | 3.064228  | -0.499693 |
| 23               | 8                | 0              | 4.032212                | -0.733057 | -0.170389 |
| 24               | 6                | 0              | 4.992973                | 0.182774  | 0.340322  |
| 25               | 1                | 0              | 4.834773                | 0.362195  | 1.407237  |
| 26               | 1                | 0              | 5.963773                | -0.286470 | 0.191759  |
| 27               | 1                | 0              | 4.958082                | 1.130393  | -0.204421 |

**Structure 32i (vacuum)**

Energy (Hartrees): -632.051681198

No imaginary frequencies

Standard orientation:

| Center<br>Number | Atomic<br>Number | Atomic<br>Type | Coordinates (Angstroms) |           |           |
|------------------|------------------|----------------|-------------------------|-----------|-----------|
|                  |                  |                | X                       | Y         | Z         |
| 1                | 6                | 0              | 1.625315                | -1.403110 | -0.591465 |
| 2                | 6                | 0              | 0.283232                | -1.072744 | -0.554026 |
| 3                | 6                | 0              | -0.155558               | 0.148850  | -0.021115 |
| 4                | 6                | 0              | 0.810445                | 1.024126  | 0.473608  |
| 5                | 6                | 0              | 2.165921                | 0.706262  | 0.442596  |
| 6                | 6                | 0              | 2.578075                | -0.513248 | -0.091300 |
| 7                | 1                | 0              | 1.965761                | -2.342935 | -1.008678 |
| 8                | 1                | 0              | -0.441005               | -1.768876 | -0.964154 |
| 9                | 1                | 0              | 0.502640                | 1.973346  | 0.892873  |
| 10               | 1                | 0              | 2.881121                | 1.413918  | 0.840031  |
| 11               | 6                | 0              | -1.600514               | 0.463390  | 0.008359  |
| 12               | 6                | 0              | -2.117774               | 1.685641  | -0.176932 |
| 13               | 1                | 0              | -3.193134               | 1.825165  | -0.135004 |
| 14               | 6                | 0              | -2.549164               | -0.642180 | 0.266069  |
| 15               | 1                | 0              | -2.113550               | -1.526825 | 0.754305  |
| 16               | 7                | 0              | -3.780351               | -0.594651 | -0.026715 |
| 17               | 6                | 0              | -4.603121               | -1.727165 | 0.343376  |
| 18               | 1                | 0              | -5.102761               | -2.114130 | -0.547863 |
| 19               | 1                | 0              | -4.036388               | -2.538883 | 0.818917  |
| 20               | 1                | 0              | -5.385559               | -1.393859 | 1.029890  |
| 21               | 8                | 0              | -1.360548               | 2.779581  | -0.434065 |
| 22               | 1                | 0              | -1.927886               | 3.540723  | -0.570557 |
| 23               | 8                | 0              | 3.872420                | -0.921398 | -0.167520 |
| 24               | 6                | 0              | 4.865155                | -0.047600 | 0.325267  |
| 25               | 1                | 0              | 4.724592                | 0.149111  | 1.392940  |
| 26               | 1                | 0              | 5.816120                | -0.553192 | 0.172900  |
| 27               | 1                | 0              | 4.865450                | 0.900194  | -0.222531 |

**Structure 32i (CHCl<sub>3</sub>)**

Energy (Hartrees): -632.071615107

No imaginary frequencies

Standard orientation:

| Center<br>Number | Atomic<br>Number | Atomic<br>Type | Coordinates (Angstroms) |           |           |
|------------------|------------------|----------------|-------------------------|-----------|-----------|
|                  |                  |                | X                       | Y         | Z         |
| 1                | 6                | 0              | 1.612157                | -1.406845 | -0.584212 |
| 2                | 6                | 0              | 0.270566                | -1.069344 | -0.544468 |
| 3                | 6                | 0              | -0.160110               | 0.158512  | -0.017671 |
| 4                | 6                | 0              | 0.814668                | 1.031977  | 0.467911  |
| 5                | 6                | 0              | 2.168993                | 0.707638  | 0.433933  |
| 6                | 6                | 0              | 2.572938                | -0.518403 | -0.093906 |
| 7                | 1                | 0              | 1.940792                | -2.354222 | -0.995930 |
| 8                | 1                | 0              | -0.458120               | -1.767255 | -0.944465 |
| 9                | 1                | 0              | 0.516404                | 1.983746  | 0.889565  |
| 10               | 1                | 0              | 2.889788                | 1.413053  | 0.826188  |
| 11               | 6                | 0              | -1.605551               | 0.477649  | 0.021471  |
| 12               | 6                | 0              | -2.117104               | 1.705454  | -0.162036 |
| 13               | 1                | 0              | -3.188231               | 1.867687  | -0.099733 |
| 14               | 6                | 0              | -2.548640               | -0.629256 | 0.287546  |
| 15               | 1                | 0              | -2.122359               | -1.488063 | 0.825177  |
| 16               | 7                | 0              | -3.769227               | -0.616532 | -0.057641 |
| 17               | 6                | 0              | -4.587980               | -1.748473 | 0.332137  |
| 18               | 1                | 0              | -5.050414               | -2.180939 | -0.558795 |
| 19               | 1                | 0              | -4.026242               | -2.529432 | 0.860088  |
| 20               | 1                | 0              | -5.400029               | -1.401334 | 0.976833  |
| 21               | 8                | 0              | -1.356890               | 2.786083  | -0.440496 |
| 22               | 1                | 0              | -1.920092               | 3.559855  | -0.551469 |
| 23               | 8                | 0              | 3.864139                | -0.931963 | -0.169699 |
| 24               | 6                | 0              | 4.867502                | -0.055930 | 0.317116  |
| 25               | 1                | 0              | 4.730096                | 0.147759  | 1.383156  |
| 26               | 1                | 0              | 5.814895                | -0.570786 | 0.168751  |
| 27               | 1                | 0              | 4.875474                | 0.884819  | -0.241244 |



**Structure 32i (DMSO)**

Energy (Hartrees): -632.069584610

No imaginary frequencies

Standard orientation:

| Center<br>Number | Atomic<br>Number | Atomic<br>Type | Coordinates (Angstroms) |           |           |
|------------------|------------------|----------------|-------------------------|-----------|-----------|
|                  |                  |                | X                       | Y         | Z         |
| 1                | 6                | 0              | 1.607587                | -1.408792 | -0.581873 |
| 2                | 6                | 0              | 0.266113                | -1.069244 | -0.539114 |
| 3                | 6                | 0              | -0.160665               | 0.162788  | -0.018125 |
| 4                | 6                | 0              | 0.817500                | 1.035906  | 0.462585  |
| 5                | 6                | 0              | 2.171534                | 0.709700  | 0.425698  |
| 6                | 6                | 0              | 2.572808                | -0.520027 | -0.098414 |
| 7                | 1                | 0              | 1.929251                | -2.360780 | -0.988832 |
| 8                | 1                | 0              | -0.464787               | -1.770945 | -0.928861 |
| 9                | 1                | 0              | 0.524551                | 1.989113  | 0.884883  |
| 10               | 1                | 0              | 2.893777                | 1.415605  | 0.814724  |
| 11               | 6                | 0              | -1.605854               | 0.482979  | 0.024815  |
| 12               | 6                | 0              | -2.119984               | 1.711144  | -0.154201 |
| 13               | 1                | 0              | -3.189892               | 1.876991  | -0.075861 |
| 14               | 6                | 0              | -2.545226               | -0.625341 | 0.298722  |
| 15               | 1                | 0              | -2.124938               | -1.469268 | 0.862805  |
| 16               | 7                | 0              | -3.758735               | -0.629017 | -0.072635 |
| 17               | 6                | 0              | -4.578615               | -1.757785 | 0.329180  |
| 18               | 1                | 0              | -5.027657               | -2.209778 | -0.559017 |
| 19               | 1                | 0              | -4.019072               | -2.524303 | 0.879189  |
| 20               | 1                | 0              | -5.400275               | -1.401339 | 0.956689  |
| 21               | 8                | 0              | -1.363835               | 2.790109  | -0.446527 |
| 22               | 1                | 0              | -1.928454               | 3.568821  | -0.517530 |
| 23               | 8                | 0              | 3.861332                | -0.934032 | -0.174662 |
| 24               | 6                | 0              | 4.863732                | -0.057501 | 0.320937  |
| 25               | 1                | 0              | 4.716054                | 0.147881  | 1.384936  |
| 26               | 1                | 0              | 5.811924                | -0.573163 | 0.181313  |
| 27               | 1                | 0              | 4.877105                | 0.882700  | -0.237724 |

**Structure 32i (C<sub>2</sub>H<sub>5</sub>OH)**

Energy (Hartrees): -632.075386353

No imaginary frequencies

Standard orientation:

| Center<br>Number | Atomic<br>Number | Atomic<br>Type | Coordinates (Angstroms) |           |           |
|------------------|------------------|----------------|-------------------------|-----------|-----------|
|                  |                  |                | X                       | Y         | Z         |
| 1                | 6                | 0              | 1.604560                | -1.396472 | -0.608488 |
| 2                | 6                | 0              | 0.262916                | -1.056874 | -0.564111 |
| 3                | 6                | 0              | -0.164166               | 0.161329  | -0.012852 |
| 4                | 6                | 0              | 0.811037                | 1.019022  | 0.500009  |
| 5                | 6                | 0              | 2.165143                | 0.693100  | 0.461611  |
| 6                | 6                | 0              | 2.565214                | -0.520517 | -0.096349 |
| 7                | 1                | 0              | 1.929805                | -2.336591 | -1.040186 |
| 8                | 1                | 0              | -0.467433               | -1.746040 | -0.976936 |
| 9                | 1                | 0              | 0.515138                | 1.958047  | 0.952272  |
| 10               | 1                | 0              | 2.886653                | 1.385892  | 0.874715  |
| 11               | 6                | 0              | -1.608947               | 0.486196  | 0.026308  |
| 12               | 6                | 0              | -2.110680               | 1.717570  | -0.165348 |
| 13               | 1                | 0              | -3.177591               | 1.901514  | -0.094968 |
| 14               | 6                | 0              | -2.550267               | -0.618290 | 0.302700  |
| 15               | 1                | 0              | -2.129279               | -1.459936 | 0.869589  |
| 16               | 7                | 0              | -3.764126               | -0.626152 | -0.069327 |
| 17               | 6                | 0              | -4.577628               | -1.757796 | 0.338698  |
| 18               | 1                | 0              | -5.024466               | -2.217649 | -0.546396 |
| 19               | 1                | 0              | -4.014471               | -2.518733 | 0.892342  |
| 20               | 1                | 0              | -5.401535               | -1.403882 | 0.964329  |
| 21               | 8                | 0              | -1.341172               | 2.785929  | -0.465439 |
| 22               | 1                | 0              | -1.895044               | 3.568748  | -0.569002 |
| 23               | 8                | 0              | 3.859336                | -0.934360 | -0.179655 |
| 24               | 6                | 0              | 4.865359                | -0.060748 | 0.318255  |
| 25               | 1                | 0              | 4.728314                | 0.125420  | 1.386886  |
| 26               | 1                | 0              | 5.812732                | -0.572118 | 0.158410  |
| 27               | 1                | 0              | 4.865515                | 0.886711  | -0.227605 |

**Structure 32j (vacuum)**

Energy (Hartrees): -632.051879836

No imaginary frequencies

Standard orientation:

| Center<br>Number | Atomic<br>Number | Atomic<br>Type | Coordinates (Angstroms) |           |           |
|------------------|------------------|----------------|-------------------------|-----------|-----------|
|                  |                  |                | X                       | Y         | Z         |
| 1                | 6                | 0              | 1.416737                | -1.198398 | -0.863548 |
| 2                | 6                | 0              | 0.087107                | -0.824940 | -0.821923 |
| 3                | 6                | 0              | -0.324825               | 0.294025  | -0.084589 |
| 4                | 6                | 0              | 0.641616                | 1.010340  | 0.615290  |
| 5                | 6                | 0              | 1.984678                | 0.639785  | 0.590865  |
| 6                | 6                | 0              | 2.375125                | -0.469701 | -0.154761 |
| 7                | 1                | 0              | 1.741843                | -2.059585 | -1.434379 |
| 8                | 1                | 0              | -0.649465               | -1.408007 | -1.358221 |
| 9                | 1                | 0              | 0.347399                | 1.875936  | 1.196174  |
| 10               | 1                | 0              | 2.702574                | 1.220531  | 1.153660  |
| 11               | 6                | 0              | -1.746428               | 0.707412  | -0.055972 |
| 12               | 6                | 0              | -2.141067               | 1.985268  | -0.177013 |
| 13               | 1                | 0              | -3.196458               | 2.243263  | -0.143089 |
| 14               | 6                | 0              | -2.829787               | -0.270980 | 0.118335  |
| 15               | 1                | 0              | -3.845850               | 0.157111  | 0.120664  |
| 16               | 7                | 0              | -2.647583               | -1.514219 | 0.266140  |
| 17               | 6                | 0              | -3.818393               | -2.345811 | 0.446527  |
| 18               | 1                | 0              | -3.847456               | -3.104242 | -0.339696 |
| 19               | 1                | 0              | -3.736188               | -2.875252 | 1.398729  |
| 20               | 1                | 0              | -4.760961               | -1.780881 | 0.432335  |
| 21               | 8                | 0              | -1.279250               | 3.016512  | -0.343857 |
| 22               | 1                | 0              | -1.764778               | 3.829670  | -0.494903 |
| 23               | 8                | 0              | 3.655150                | -0.919067 | -0.250429 |
| 24               | 6                | 0              | 4.650379                | -0.216530 | 0.460923  |
| 25               | 1                | 0              | 4.453422                | -0.232418 | 1.537741  |
| 26               | 1                | 0              | 5.587427                | -0.730307 | 0.257460  |
| 27               | 1                | 0              | 4.723510                | 0.821340  | 0.120022  |

**Structure 32j (CHCl<sub>3</sub>)**

Energy (Hartrees): -632.073564481

No imaginary frequencies

Standard orientation:

| Center<br>Number | Atomic<br>Number | Atomic<br>Type | Coordinates (Angstroms) |           |           |
|------------------|------------------|----------------|-------------------------|-----------|-----------|
|                  |                  |                | X                       | Y         | Z         |
| 1                | 6                | 0              | -1.430957               | -1.153490 | 0.925073  |
| 2                | 6                | 0              | -0.099355               | -0.781292 | 0.883119  |
| 3                | 6                | 0              | 0.327465                | 0.290426  | 0.086233  |
| 4                | 6                | 0              | -0.628942               | 0.964477  | -0.669401 |
| 5                | 6                | 0              | -1.974242               | 0.598760  | -0.642751 |
| 6                | 6                | 0              | -2.378423               | -0.466198 | 0.160108  |
| 7                | 1                | 0              | -1.761596               | -1.979035 | 1.544813  |
| 8                | 1                | 0              | 0.623588                | -1.325886 | 1.477818  |
| 9                | 1                | 0              | -0.323919               | 1.794854  | -1.295904 |
| 10               | 1                | 0              | -2.683953               | 1.147419  | -1.247487 |
| 11               | 6                | 0              | 1.751006                | 0.704042  | 0.059706  |
| 12               | 6                | 0              | 2.139201                | 1.986085  | 0.183129  |
| 13               | 1                | 0              | 3.192149                | 2.254361  | 0.156010  |
| 14               | 6                | 0              | 2.834063                | -0.271290 | -0.112442 |
| 15               | 1                | 0              | 3.848926                | 0.153010  | -0.082579 |
| 16               | 7                | 0              | 2.651965                | -1.513188 | -0.294327 |
| 17               | 6                | 0              | 3.829769                | -2.342800 | -0.457950 |
| 18               | 1                | 0              | 3.845055                | -3.106765 | 0.324305  |
| 19               | 1                | 0              | 3.769802                | -2.867727 | -1.414896 |
| 20               | 1                | 0              | 4.769207                | -1.775707 | -0.420477 |
| 21               | 8                | 0              | 1.270356                | 3.003409  | 0.353162  |
| 22               | 1                | 0              | 1.752788                | 3.829396  | 0.469186  |
| 23               | 8                | 0              | -3.659678               | -0.906209 | 0.261528  |
| 24               | 6                | 0              | -4.654154               | -0.218931 | -0.478930 |
| 25               | 1                | 0              | -4.462328               | -0.283358 | -1.554282 |
| 26               | 1                | 0              | -5.595689               | -0.715621 | -0.251760 |
| 27               | 1                | 0              | -4.715801               | 0.831034  | -0.177339 |

**Structure 32j (DMSO)**

Energy (Hartrees): -632.073289352

No imaginary frequencies

Standard orientation:

| Center<br>Number | Atomic<br>Number | Atomic<br>Type | Coordinates (Angstroms) |           |           |
|------------------|------------------|----------------|-------------------------|-----------|-----------|
|                  |                  |                | X                       | Y         | Z         |
| 1                | 6                | 0              | -1.446024               | -1.058050 | 1.023088  |
| 2                | 6                | 0              | -0.111280               | -0.696104 | 0.971661  |
| 3                | 6                | 0              | 0.334183                | 0.301858  | 0.093345  |
| 4                | 6                | 0              | -0.605399               | 0.914388  | -0.731982 |
| 5                | 6                | 0              | -1.954009               | 0.558877  | -0.696889 |
| 6                | 6                | 0              | -2.378125               | -0.433458 | 0.186332  |
| 7                | 1                | 0              | -1.789679               | -1.825849 | 1.707060  |
| 8                | 1                | 0              | 0.599402                | -1.188650 | 1.625653  |
| 9                | 1                | 0              | -0.284614               | 1.685843  | -1.423430 |
| 10               | 1                | 0              | -2.650166               | 1.056955  | -1.358888 |
| 11               | 6                | 0              | 1.762613                | 0.698469  | 0.054012  |
| 12               | 6                | 0              | 2.166362                | 1.976419  | 0.169981  |
| 13               | 1                | 0              | 3.221631                | 2.234071  | 0.132816  |
| 14               | 6                | 0              | 2.824419                | -0.296946 | -0.120950 |
| 15               | 1                | 0              | 3.848495                | 0.100944  | -0.088288 |
| 16               | 7                | 0              | 2.607955                | -1.534457 | -0.307547 |
| 17               | 6                | 0              | 3.765350                | -2.395570 | -0.468373 |
| 18               | 1                | 0              | 3.756388                | -3.161944 | 0.311903  |
| 19               | 1                | 0              | 3.697741                | -2.915648 | -1.427782 |
| 20               | 1                | 0              | 4.717325                | -1.852067 | -0.422924 |
| 21               | 8                | 0              | 1.307265                | 2.998325  | 0.349961  |
| 22               | 1                | 0              | 1.799771                | 3.823283  | 0.435349  |
| 23               | 8                | 0              | -3.661489               | -0.855319 | 0.302536  |
| 24               | 6                | 0              | -4.632837               | -0.245574 | -0.535821 |
| 25               | 1                | 0              | -4.405000               | -0.415191 | -1.592100 |
| 26               | 1                | 0              | -5.581793               | -0.719028 | -0.291316 |
| 27               | 1                | 0              | -4.702918               | 0.828593  | -0.341635 |

**Structure 32j (C<sub>2</sub>H<sub>5</sub>OH)**

Energy (Hartrees): -632.078887657

No imaginary frequencies

Standard orientation:

| Center<br>Number | Atomic<br>Number | Atomic<br>Type | Coordinates (Angstroms) |           |           |
|------------------|------------------|----------------|-------------------------|-----------|-----------|
|                  |                  |                | X                       | Y         | Z         |
| 1                | 6                | 0              | -1.457125               | -1.021322 | 1.059913  |
| 2                | 6                | 0              | -0.121021               | -0.663690 | 1.009733  |
| 3                | 6                | 0              | 0.334122                | 0.302444  | 0.101763  |
| 4                | 6                | 0              | -0.595631               | 0.888882  | -0.753463 |
| 5                | 6                | 0              | -1.945393               | 0.537841  | -0.719538 |
| 6                | 6                | 0              | -2.376709               | -0.422794 | 0.192612  |
| 7                | 1                | 0              | -1.812248               | -1.764965 | 1.764901  |
| 8                | 1                | 0              | 0.582462                | -1.134600 | 1.687388  |
| 9                | 1                | 0              | -0.264681               | 1.634187  | -1.469015 |
| 10               | 1                | 0              | -2.635151               | 1.013065  | -1.404722 |
| 11               | 6                | 0              | 1.764718                | 0.693442  | 0.059689  |
| 12               | 6                | 0              | 2.166590                | 1.972603  | 0.167763  |
| 13               | 1                | 0              | 3.219419                | 2.238739  | 0.131571  |
| 14               | 6                | 0              | 2.824246                | -0.303004 | -0.115895 |
| 15               | 1                | 0              | 3.848072                | 0.095242  | -0.081478 |
| 16               | 7                | 0              | 2.609888                | -1.540329 | -0.309712 |
| 17               | 6                | 0              | 3.773260                | -2.393670 | -0.475451 |
| 18               | 1                | 0              | 3.773053                | -3.162064 | 0.302660  |
| 19               | 1                | 0              | 3.707461                | -2.912837 | -1.435245 |
| 20               | 1                | 0              | 4.721737                | -1.844352 | -0.432015 |
| 21               | 8                | 0              | 1.301937                | 2.993490  | 0.335941  |
| 22               | 1                | 0              | 1.784511                | 3.824609  | 0.420452  |
| 23               | 8                | 0              | -3.666809               | -0.841060 | 0.311255  |
| 24               | 6                | 0              | -4.632901               | -0.263545 | -0.558088 |
| 25               | 1                | 0              | -4.391519               | -0.469279 | -1.604565 |
| 26               | 1                | 0              | -5.581516               | -0.733687 | -0.305657 |
| 27               | 1                | 0              | -4.706769               | 0.815680  | -0.398082 |

**Structure 32k (vacuum)**

Energy (Hartrees): -632.051738231

No imaginary frequencies

Standard orientation:

| Center<br>Number | Atomic<br>Number | Atomic<br>Type | Coordinates (Angstroms) |           |           |
|------------------|------------------|----------------|-------------------------|-----------|-----------|
|                  |                  |                | X                       | Y         | Z         |
| 1                | 6                | 0              | -1.842949               | 0.714341  | -0.592926 |
| 2                | 6                | 0              | -0.457025               | 0.603374  | -0.656171 |
| 3                | 6                | 0              | 0.219911                | -0.428082 | -0.007618 |
| 4                | 6                | 0              | -0.537493               | -1.342149 | 0.735299  |
| 5                | 6                | 0              | -1.916883               | -1.247832 | 0.805150  |
| 6                | 6                | 0              | -2.579396               | -0.217380 | 0.137451  |
| 7                | 1                | 0              | -2.329492               | 1.528586  | -1.112813 |
| 8                | 1                | 0              | 0.107328                | 1.337418  | -1.215841 |
| 9                | 1                | 0              | -0.031577               | -2.126833 | 1.287590  |
| 10               | 1                | 0              | -2.503451               | -1.949111 | 1.385791  |
| 11               | 6                | 0              | 1.691320                | -0.576886 | -0.115937 |
| 12               | 6                | 0              | 2.210190                | -1.790319 | -0.359971 |
| 13               | 1                | 0              | 1.569140                | -2.650852 | -0.528153 |
| 14               | 6                | 0              | 2.600012                | 0.568892  | 0.045741  |
| 15               | 1                | 0              | 3.668198                | 0.339099  | -0.053968 |
| 16               | 7                | 0              | 2.193037                | 1.745151  | 0.285574  |
| 17               | 6                | 0              | 3.197872                | 2.777507  | 0.431464  |
| 18               | 1                | 0              | 3.020250                | 3.559272  | -0.311446 |
| 19               | 1                | 0              | 3.089440                | 3.241727  | 1.414710  |
| 20               | 1                | 0              | 4.225263                | 2.405460  | 0.321301  |
| 21               | 8                | 0              | 3.550521                | -2.018416 | -0.409457 |
| 22               | 1                | 0              | 3.719860                | -2.915110 | -0.702850 |
| 23               | 8                | 0              | -3.933338               | -0.197924 | 0.265003  |
| 24               | 6                | 0              | -4.637782               | 0.843403  | -0.376160 |
| 25               | 1                | 0              | -4.492446               | 0.811045  | -1.460745 |
| 26               | 1                | 0              | -5.689081               | 0.682017  | -0.147891 |
| 27               | 1                | 0              | -4.328811               | 1.822725  | 0.002997  |

**Structure 32k (CHCl<sub>3</sub>)**

Energy (Hartrees): -632.072286824

No imaginary frequencies

Standard orientation:

| Center<br>Number | Atomic<br>Number | Atomic<br>Type | Coordinates (Angstroms) |           |           |
|------------------|------------------|----------------|-------------------------|-----------|-----------|
|                  |                  |                | X                       | Y         | Z         |
| 1                | 6                | 0              | -1.853840               | 0.695607  | -0.622756 |
| 2                | 6                | 0              | -0.468057               | 0.579331  | -0.695201 |
| 3                | 6                | 0              | 0.218085                | -0.427302 | -0.015106 |
| 4                | 6                | 0              | -0.532921               | -1.317758 | 0.763538  |
| 5                | 6                | 0              | -1.912738               | -1.219737 | 0.842337  |
| 6                | 6                | 0              | -2.582893               | -0.210752 | 0.147803  |
| 7                | 1                | 0              | -2.347273               | 1.490293  | -1.166805 |
| 8                | 1                | 0              | 0.087794                | 1.288533  | -1.296320 |
| 9                | 1                | 0              | -0.024087               | -2.090999 | 1.329544  |
| 10               | 1                | 0              | -2.490469               | -1.906872 | 1.449819  |
| 11               | 6                | 0              | 1.691077                | -0.574352 | -0.128235 |
| 12               | 6                | 0              | 2.210793                | -1.793154 | -0.359518 |
| 13               | 1                | 0              | 1.574092                | -2.660082 | -0.511684 |
| 14               | 6                | 0              | 2.598456                | 0.571338  | 0.023578  |
| 15               | 1                | 0              | 3.662526                | 0.351832  | -0.124107 |
| 16               | 7                | 0              | 2.205299                | 1.743236  | 0.314267  |
| 17               | 6                | 0              | 3.221727                | 2.769396  | 0.444075  |
| 18               | 1                | 0              | 3.018995                | 3.571083  | -0.271380 |
| 19               | 1                | 0              | 3.157773                | 3.210730  | 1.442205  |
| 20               | 1                | 0              | 4.240686                | 2.395048  | 0.282329  |
| 21               | 8                | 0              | 3.544362                | -2.019581 | -0.419514 |
| 22               | 1                | 0              | 3.707466                | -2.935344 | -0.669432 |
| 23               | 8                | 0              | -3.934262               | -0.185692 | 0.285910  |
| 24               | 6                | 0              | -4.648624               | 0.836307  | -0.389125 |
| 25               | 1                | 0              | -4.506604               | 0.770062  | -1.471994 |
| 26               | 1                | 0              | -5.699029               | 0.674476  | -0.154020 |
| 27               | 1                | 0              | -4.346142               | 1.827225  | -0.037537 |

### Structure 32k (DMSO)

Energy (Hartrees): -632.071245651

No imaginary frequencies

Standard orientation:

| Center<br>Number | Atomic<br>Number | Atomic<br>Type | Coordinates (Angstroms) |           |           |
|------------------|------------------|----------------|-------------------------|-----------|-----------|
|                  |                  |                | X                       | Y         | Z         |
| 1                | 6                | 0              | -1.857639               | 0.678745  | -0.642412 |
| 2                | 6                | 0              | -0.472333               | 0.558522  | -0.721258 |
| 3                | 6                | 0              | 0.219472                | -0.426929 | -0.015303 |
| 4                | 6                | 0              | -0.525370               | -1.294005 | 0.795094  |
| 5                | 6                | 0              | -1.905259               | -1.192343 | 0.880527  |
| 6                | 6                | 0              | -2.582206               | -0.204446 | 0.160891  |
| 7                | 1                | 0              | -2.353948               | 1.455783  | -1.209019 |
| 8                | 1                | 0              | 0.076702                | 1.245602  | -1.354927 |
| 9                | 1                | 0              | -0.013522               | -2.055525 | 1.374317  |
| 10               | 1                | 0              | -2.475801               | -1.865444 | 1.510474  |
| 11               | 6                | 0              | 1.691551                | -0.574399 | -0.139733 |
| 12               | 6                | 0              | 2.211712                | -1.796068 | -0.358330 |
| 13               | 1                | 0              | 1.575529                | -2.668107 | -0.483727 |
| 14               | 6                | 0              | 2.593400                | 0.577262  | -0.008237 |
| 15               | 1                | 0              | 3.649129                | 0.381039  | -0.227645 |
| 16               | 7                | 0              | 2.204822                | 1.733020  | 0.349915  |
| 17               | 6                | 0              | 3.215845                | 2.769332  | 0.453784  |
| 18               | 1                | 0              | 2.935200                | 3.613209  | -0.182369 |
| 19               | 1                | 0              | 3.243758                | 3.140916  | 1.481817  |
| 20               | 1                | 0              | 4.218358                | 2.426092  | 0.169899  |
| 21               | 8                | 0              | 3.543443                | -2.016367 | -0.430565 |
| 22               | 1                | 0              | 3.706342                | -2.938532 | -0.660094 |
| 23               | 8                | 0              | -3.930537               | -0.174567 | 0.304640  |
| 24               | 6                | 0              | -4.647623               | 0.816597  | -0.417690 |
| 25               | 1                | 0              | -4.497487               | 0.705306  | -1.495372 |
| 26               | 1                | 0              | -5.698599               | 0.659650  | -0.182520 |
| 27               | 1                | 0              | -4.351973               | 1.822732  | -0.106830 |

### Structure 32k (C<sub>2</sub>H<sub>5</sub>OH)

Energy (Hartrees): -632.076582328

No imaginary frequencies

Standard orientation:

| Center<br>Number | Atomic<br>Number | Atomic<br>Type | Coordinates (Angstroms) |           |           |
|------------------|------------------|----------------|-------------------------|-----------|-----------|
|                  |                  |                | X                       | Y         | Z         |
| 1                | 6                | 0              | -1.859075               | 0.665617  | -0.661266 |
| 2                | 6                | 0              | -0.474095               | 0.543804  | -0.739770 |
| 3                | 6                | 0              | 0.219212                | -0.422348 | -0.009235 |
| 4                | 6                | 0              | -0.522070               | -1.268267 | 0.825580  |
| 5                | 6                | 0              | -1.902230               | -1.164948 | 0.911490  |
| 6                | 6                | 0              | -2.578179               | -0.197125 | 0.166797  |
| 7                | 1                | 0              | -2.358232               | 1.426512  | -1.246967 |
| 8                | 1                | 0              | 0.073534                | 1.213129  | -1.393677 |
| 9                | 1                | 0              | -0.007726               | -2.013713 | 1.423205  |
| 10               | 1                | 0              | -2.473167               | -1.820793 | 1.559506  |
| 11               | 6                | 0              | 1.690927                | -0.573700 | -0.136797 |
| 12               | 6                | 0              | 2.203724                | -1.797032 | -0.363201 |
| 13               | 1                | 0              | 1.565216                | -2.666441 | -0.490725 |
| 14               | 6                | 0              | 2.595185                | 0.575669  | -0.008674 |
| 15               | 1                | 0              | 3.647274                | 0.380853  | -0.246257 |
| 16               | 7                | 0              | 2.213582                | 1.729602  | 0.363952  |
| 17               | 6                | 0              | 3.228599                | 2.764223  | 0.449497  |
| 18               | 1                | 0              | 2.939261                | 3.607031  | -0.183999 |
| 19               | 1                | 0              | 3.275067                | 3.139428  | 1.475354  |
| 20               | 1                | 0              | 4.225778                | 2.419432  | 0.149851  |
| 21               | 8                | 0              | 3.534461                | -2.028053 | -0.444007 |
| 22               | 1                | 0              | 3.692163                | -2.949969 | -0.678881 |
| 23               | 8                | 0              | -3.931886               | -0.164932 | 0.312852  |
| 24               | 6                | 0              | -4.655586               | 0.803576  | -0.436152 |
| 25               | 1                | 0              | -4.505951               | 0.659159  | -1.509676 |
| 26               | 1                | 0              | -5.704929               | 0.647089  | -0.193000 |
| 27               | 1                | 0              | -4.362430               | 1.818136  | -0.152762 |

**Structure 32l (vacuum)**

Energy (Hartrees): -632.050685667

No imaginary frequencies

Standard orientation:

| Center<br>Number | Atomic<br>Number | Atomic<br>Type | Coordinates (Angstroms) |           |           |
|------------------|------------------|----------------|-------------------------|-----------|-----------|
|                  |                  |                | X                       | Y         | Z         |
| 1                | 6                | 0              | -1.836496               | 0.699600  | -0.613645 |
| 2                | 6                | 0              | -0.451495               | 0.583627  | -0.684024 |
| 3                | 6                | 0              | 0.227943                | -0.431880 | -0.014438 |
| 4                | 6                | 0              | -0.524557               | -1.327097 | 0.755116  |
| 5                | 6                | 0              | -1.903174               | -1.228265 | 0.832279  |
| 6                | 6                | 0              | -2.568785               | -0.212739 | 0.145182  |
| 7                | 1                | 0              | -2.325693               | 1.501242  | -1.150319 |
| 8                | 1                | 0              | 0.109580                | 1.302215  | -1.267363 |
| 9                | 1                | 0              | -0.015837               | -2.102747 | 1.317340  |
| 10               | 1                | 0              | -2.487134               | -1.916114 | 1.431297  |
| 11               | 6                | 0              | 1.700710                | -0.585944 | -0.127202 |
| 12               | 6                | 0              | 2.201894                | -1.812043 | -0.373823 |
| 13               | 1                | 0              | 1.543506                | -2.655847 | -0.545078 |
| 14               | 6                | 0              | 2.586454                | 0.572591  | 0.033906  |
| 15               | 1                | 0              | 3.667743                | 0.398013  | -0.101574 |
| 16               | 7                | 0              | 2.179129                | 1.740363  | 0.305900  |
| 17               | 6                | 0              | 3.168888                | 2.786831  | 0.439392  |
| 18               | 1                | 0              | 2.958358                | 3.575374  | -0.287259 |
| 19               | 1                | 0              | 3.079740                | 3.235089  | 1.431666  |
| 20               | 1                | 0              | 4.200178                | 2.435018  | 0.295885  |
| 21               | 8                | 0              | 3.495757                | -2.191436 | -0.456311 |
| 22               | 1                | 0              | 4.084512                | -1.458487 | -0.256922 |
| 23               | 8                | 0              | -3.921241               | -0.187687 | 0.282289  |
| 24               | 6                | 0              | -4.630296               | 0.833223  | -0.386225 |
| 25               | 1                | 0              | -4.489559               | 0.768829  | -1.469996 |
| 26               | 1                | 0              | -5.680280               | 0.676714  | -0.148754 |
| 27               | 1                | 0              | -4.321661               | 1.823728  | -0.037160 |

**Structure 32l (CHCl<sub>3</sub>)**

Energy (Hartrees): -632.070537612

No imaginary frequencies

Standard orientation:

| Center<br>Number | Atomic<br>Number | Atomic<br>Type | Coordinates (Angstroms) |           |           |
|------------------|------------------|----------------|-------------------------|-----------|-----------|
|                  |                  |                | X                       | Y         | Z         |
| 1                | 6                | 0              | -1.846378               | 0.672296  | -0.651930 |
| 2                | 6                | 0              | -0.461628               | 0.552534  | -0.731341 |
| 3                | 6                | 0              | 0.229537                | -0.427399 | -0.019150 |
| 4                | 6                | 0              | -0.513572               | -1.287869 | 0.798668  |
| 5                | 6                | 0              | -1.892917               | -1.186529 | 0.885170  |
| 6                | 6                | 0              | -2.568744               | -0.204951 | 0.158346  |
| 7                | 1                | 0              | -2.344259               | 1.445822  | -1.221696 |
| 8                | 1                | 0              | 0.088296                | 1.238429  | -1.365060 |
| 9                | 1                | 0              | 0.000618                | -2.041661 | 1.385546  |
| 10               | 1                | 0              | -2.465855               | -1.851660 | 1.521028  |
| 11               | 6                | 0              | 1.703023                | -0.581655 | -0.143533 |
| 12               | 6                | 0              | 2.196640                | -1.814420 | -0.375589 |
| 13               | 1                | 0              | 1.533356                | -2.658706 | -0.530234 |
| 14               | 6                | 0              | 2.590507                | 0.580485  | -0.009700 |
| 15               | 1                | 0              | 3.651324                | 0.432883  | -0.262282 |
| 16               | 7                | 0              | 2.191794                | 1.725452  | 0.364916  |
| 17               | 6                | 0              | 3.177008                | 2.784802  | 0.448435  |
| 18               | 1                | 0              | 2.864183                | 3.617867  | -0.186437 |
| 19               | 1                | 0              | 3.209911                | 3.161439  | 1.474067  |
| 20               | 1                | 0              | 4.184971                | 2.468038  | 0.150418  |
| 21               | 8                | 0              | 3.486554                | -2.199815 | -0.458528 |
| 22               | 1                | 0              | 4.089738                | -1.478673 | -0.243138 |
| 23               | 8                | 0              | -3.918846               | -0.175281 | 0.305396  |
| 24               | 6                | 0              | -4.640608               | 0.814164  | -0.409147 |
| 25               | 1                | 0              | -4.501610               | 0.702819  | -1.488687 |
| 26               | 1                | 0              | -5.689448               | 0.656753  | -0.164179 |
| 27               | 1                | 0              | -4.342660               | 1.820502  | -0.100068 |

**Structure 32l (DMSO)**

Energy (Hartrees): -632.069923447

No imaginary frequencies

Standard orientation:

| Center<br>Number | Atomic<br>Number | Atomic<br>Type | Coordinates (Angstroms) |           |           |
|------------------|------------------|----------------|-------------------------|-----------|-----------|
|                  |                  |                | X                       | Y         | Z         |
| 1                | 6                | 0              | -1.847784               | 0.660449  | -0.659576 |
| 2                | 6                | 0              | -0.463377               | 0.536783  | -0.742456 |
| 3                | 6                | 0              | 0.229980                | -0.437137 | -0.022588 |
| 4                | 6                | 0              | -0.511574               | -1.290391 | 0.804383  |
| 5                | 6                | 0              | -1.891271               | -1.185797 | 0.893704  |
| 6                | 6                | 0              | -2.569907               | -0.208391 | 0.161817  |
| 7                | 1                | 0              | -2.345293               | 1.429052  | -1.236475 |
| 8                | 1                | 0              | 0.083689                | 1.213550  | -1.389131 |
| 9                | 1                | 0              | 0.002200                | -2.043121 | 1.393288  |
| 10               | 1                | 0              | -2.459973               | -1.848213 | 1.536507  |
| 11               | 6                | 0              | 1.703862                | -0.583501 | -0.147915 |
| 12               | 6                | 0              | 2.211604                | -1.812862 | -0.368738 |
| 13               | 1                | 0              | 1.558532                | -2.668866 | -0.503515 |
| 14               | 6                | 0              | 2.581303                | 0.586510  | -0.020065 |
| 15               | 1                | 0              | 3.637277                | 0.454732  | -0.294102 |
| 16               | 7                | 0              | 2.178172                | 1.722382  | 0.379706  |
| 17               | 6                | 0              | 3.157572                | 2.789909  | 0.456233  |
| 18               | 1                | 0              | 2.831885                | 3.622322  | -0.173427 |
| 19               | 1                | 0              | 3.200056                | 3.163510  | 1.482760  |
| 20               | 1                | 0              | 4.162487                | 2.478430  | 0.145630  |
| 21               | 8                | 0              | 3.505467                | -2.177583 | -0.458509 |
| 22               | 1                | 0              | 4.097481                | -1.434564 | -0.283626 |
| 23               | 8                | 0              | -3.917315               | -0.173167 | 0.311683  |
| 24               | 6                | 0              | -4.635252               | 0.812761  | -0.417126 |
| 25               | 1                | 0              | -4.492484               | 0.688969  | -1.494404 |
| 26               | 1                | 0              | -5.685327               | 0.662430  | -0.173769 |
| 27               | 1                | 0              | -4.333885               | 1.821097  | -0.119111 |

**Structure 32l (C<sub>2</sub>H<sub>5</sub>OH)**

Energy (Hartrees): -632.074535326

No imaginary frequencies

Standard orientation:

| Center<br>Number | Atomic<br>Number | Atomic<br>Type | Coordinates (Angstroms) |           |           |
|------------------|------------------|----------------|-------------------------|-----------|-----------|
|                  |                  |                | X                       | Y         | Z         |
| 1                | 6                | 0              | -1.850604               | 0.657237  | -0.669891 |
| 2                | 6                | 0              | -0.466283               | 0.533306  | -0.753210 |
| 3                | 6                | 0              | 0.228771                | -0.427688 | -0.017858 |
| 4                | 6                | 0              | -0.509425               | -1.266440 | 0.826280  |
| 5                | 6                | 0              | -1.889221               | -1.161388 | 0.916876  |
| 6                | 6                | 0              | -2.567195               | -0.198537 | 0.167894  |
| 7                | 1                | 0              | -2.351356               | 1.414290  | -1.259168 |
| 8                | 1                | 0              | 0.079263                | 1.198036  | -1.413775 |
| 9                | 1                | 0              | 0.006742                | -2.008090 | 1.427020  |
| 10               | 1                | 0              | -2.457957               | -1.812191 | 1.571826  |
| 11               | 6                | 0              | 1.701987                | -0.581215 | -0.148365 |
| 12               | 6                | 0              | 2.195004                | -1.815008 | -0.375154 |
| 13               | 1                | 0              | 1.531845                | -2.662570 | -0.513699 |
| 14               | 6                | 0              | 2.587536                | 0.583033  | -0.024606 |
| 15               | 1                | 0              | 3.637351                | 0.444799  | -0.317161 |
| 16               | 7                | 0              | 2.195677                | 1.718411  | 0.389790  |
| 17               | 6                | 0              | 3.185155                | 2.778578  | 0.451576  |
| 18               | 1                | 0              | 2.857342                | 3.614103  | -0.172644 |
| 19               | 1                | 0              | 3.247392                | 3.152874  | 1.476699  |
| 20               | 1                | 0              | 4.182772                | 2.460114  | 0.125573  |
| 21               | 8                | 0              | 3.486363                | -2.197379 | -0.468154 |
| 22               | 1                | 0              | 4.096438                | -1.474594 | -0.274009 |
| 23               | 8                | 0              | -3.920018               | -0.163629 | 0.319763  |
| 24               | 6                | 0              | -4.646244               | 0.801155  | -0.431690 |
| 25               | 1                | 0              | -4.501505               | 0.650407  | -1.504975 |
| 26               | 1                | 0              | -5.694607               | 0.646777  | -0.183030 |
| 27               | 1                | 0              | -4.351101               | 1.817040  | -0.155179 |

### Structure 33a (vacuum)

Energy (Hartrees): -722.056855450  
No imaginary frequencies

Standard orientation:

| Center<br>Number | Atomic<br>Number | Atomic<br>Type | Coordinates (Angstroms) |           |           |
|------------------|------------------|----------------|-------------------------|-----------|-----------|
|                  |                  |                | X                       | Y         | Z         |
| 1                | 6                | 0              | 1.943691                | 1.101695  | 0.475084  |
| 2                | 6                | 0              | 0.566243                | 1.246444  | 0.438854  |
| 3                | 6                | 0              | -0.259885               | 0.231114  | -0.068586 |
| 4                | 6                | 0              | 0.348422                | -0.942428 | -0.540493 |
| 5                | 6                | 0              | 1.722331                | -1.112255 | -0.492117 |
| 6                | 6                | 0              | 2.500981                | -0.081877 | 0.013687  |
| 7                | 1                | 0              | 2.586582                | 1.877104  | 0.869293  |
| 8                | 1                | 0              | 0.122123                | 2.150351  | 0.838184  |
| 9                | 1                | 0              | -0.262655               | -1.720595 | -0.982860 |
| 10               | 1                | 0              | 2.197448                | -2.012407 | -0.858223 |
| 11               | 6                | 0              | -1.721764               | 0.401411  | -0.106283 |
| 12               | 6                | 0              | -2.554106               | -0.662924 | 0.180331  |
| 13               | 1                | 0              | -2.113660               | -1.615660 | 0.469280  |
| 14               | 6                | 0              | -2.294232               | 1.683868  | -0.449048 |
| 15               | 1                | 0              | -1.574007               | 2.483748  | -0.696076 |
| 16               | 1                | 0              | -4.303574               | 0.253042  | -0.088006 |
| 17               | 7                | 0              | -3.882822               | -0.639638 | 0.164073  |
| 18               | 6                | 0              | -4.718886               | -1.765075 | 0.530227  |
| 19               | 1                | 0              | -5.373232               | -2.042554 | -0.298125 |
| 20               | 1                | 0              | -4.086934               | -2.618350 | 0.776693  |
| 21               | 1                | 0              | -5.332742               | -1.523320 | 1.400098  |
| 22               | 8                | 0              | -3.494994               | 1.921380  | -0.504761 |
| 23               | 7                | 0              | 3.963069                | -0.247909 | 0.056657  |
| 24               | 8                | 0              | 4.621212                | 0.671781  | 0.494975  |
| 25               | 8                | 0              | 4.421551                | -1.295457 | -0.348378 |

### Structure 33a (CHCl<sub>3</sub>)

Energy (Hartrees): -722.077857877  
No imaginary frequencies

Standard orientation:

| Center<br>Number | Atomic<br>Number | Atomic<br>Type | Coordinates (Angstroms) |           |           |
|------------------|------------------|----------------|-------------------------|-----------|-----------|
|                  |                  |                | X                       | Y         | Z         |
| 1                | 6                | 0              | 1.952153                | 1.118230  | 0.438656  |
| 2                | 6                | 0              | 0.575930                | 1.267617  | 0.412323  |
| 3                | 6                | 0              | -0.262965               | 0.238510  | -0.051719 |
| 4                | 6                | 0              | 0.338070                | -0.957104 | -0.483485 |
| 5                | 6                | 0              | 1.710267                | -1.130891 | -0.443873 |
| 6                | 6                | 0              | 2.501622                | -0.084721 | 0.013554  |
| 7                | 1                | 0              | 2.593199                | 1.910582  | 0.801808  |
| 8                | 1                | 0              | 0.145505                | 2.188576  | 0.786944  |
| 9                | 1                | 0              | -0.276952               | -1.753232 | -0.885729 |
| 10               | 1                | 0              | 2.167078                | -2.050676 | -0.784431 |
| 11               | 6                | 0              | -1.722616               | 0.413999  | -0.089033 |
| 12               | 6                | 0              | -2.559367               | -0.667299 | 0.168256  |
| 13               | 1                | 0              | -2.121164               | -1.627151 | 0.434560  |
| 14               | 6                | 0              | -2.284165               | 1.698502  | -0.405907 |
| 15               | 1                | 0              | -1.563183               | 2.499987  | -0.638744 |
| 16               | 1                | 0              | -4.314386               | 0.244831  | -0.084109 |
| 17               | 7                | 0              | -3.879690               | -0.645405 | 0.148982  |
| 18               | 6                | 0              | -4.719920               | -1.785547 | 0.467561  |
| 19               | 1                | 0              | -5.351120               | -2.038418 | -0.386073 |
| 20               | 1                | 0              | -4.090938               | -2.641235 | 0.711150  |
| 21               | 1                | 0              | -5.356520               | -1.556275 | 1.323897  |
| 22               | 8                | 0              | -3.489468               | 1.949287  | -0.461978 |
| 23               | 7                | 0              | 3.954775                | -0.254328 | 0.044349  |
| 24               | 8                | 0              | 4.635166                | 0.688461  | 0.400818  |
| 25               | 8                | 0              | 4.412903                | -1.331079 | -0.287663 |



### Structure 33a (DMSO)

Energy (Hartrees): -722.078408820  
No imaginary frequencies

Standard orientation:

| Center<br>Number | Atomic<br>Number | Atomic<br>Type | Coordinates (Angstroms) |           |           |
|------------------|------------------|----------------|-------------------------|-----------|-----------|
|                  |                  |                | X                       | Y         | Z         |
| 1                | 6                | 0              | 1.952832                | 1.121292  | 0.428737  |
| 2                | 6                | 0              | 0.576974                | 1.271575  | 0.404873  |
| 3                | 6                | 0              | -0.265123               | 0.237854  | -0.045829 |
| 4                | 6                | 0              | 0.334211                | -0.964601 | -0.463988 |
| 5                | 6                | 0              | 1.706354                | -1.137494 | -0.428548 |
| 6                | 6                | 0              | 2.501224                | -0.086496 | 0.013987  |
| 7                | 1                | 0              | 2.592194                | 1.919205  | 0.782825  |
| 8                | 1                | 0              | 0.150689                | 2.198026  | 0.770504  |
| 9                | 1                | 0              | -0.280941               | -1.769132 | -0.849061 |
| 10               | 1                | 0              | 2.157383                | -2.063480 | -0.760065 |
| 11               | 6                | 0              | -1.723481               | 0.416838  | -0.083357 |
| 12               | 6                | 0              | -2.562421               | -0.668088 | 0.166510  |
| 13               | 1                | 0              | -2.125888               | -1.631126 | 0.423393  |
| 14               | 6                | 0              | -2.277822               | 1.703413  | -0.399685 |
| 15               | 1                | 0              | -1.550994               | 2.499994  | -0.630818 |
| 16               | 1                | 0              | -4.322056               | 0.241773  | -0.078765 |
| 17               | 7                | 0              | -3.880552               | -0.646003 | 0.148672  |
| 18               | 6                | 0              | -4.719075               | -1.792315 | 0.454166  |
| 19               | 1                | 0              | -5.338967               | -2.043516 | -0.408098 |
| 20               | 1                | 0              | -4.087372               | -2.644253 | 0.702674  |
| 21               | 1                | 0              | -5.366649               | -1.565163 | 1.302533  |
| 22               | 8                | 0              | -3.481914               | 1.963469  | -0.460013 |
| 23               | 7                | 0              | 3.952391                | -0.255354 | 0.040663  |
| 24               | 8                | 0              | 4.635033                | 0.686083  | 0.401519  |
| 25               | 8                | 0              | 4.412841                | -1.330138 | -0.299214 |

### Structure 33a (C<sub>2</sub>H<sub>5</sub>OH)

Energy (Hartrees): -722.079379046  
No imaginary frequencies

Standard orientation:

| Center<br>Number | Atomic<br>Number | Atomic<br>Type | Coordinates (Angstroms) |           |           |
|------------------|------------------|----------------|-------------------------|-----------|-----------|
|                  |                  |                | X                       | Y         | Z         |
| 1                | 6                | 0              | 1.952726                | 1.120474  | 0.435725  |
| 2                | 6                | 0              | 0.577674                | 1.272130  | 0.412074  |
| 3                | 6                | 0              | -0.264122               | 0.243154  | -0.049629 |
| 4                | 6                | 0              | 0.332982                | -0.956256 | -0.479244 |
| 5                | 6                | 0              | 1.704183                | -1.132590 | -0.442072 |
| 6                | 6                | 0              | 2.498798                | -0.085746 | 0.011834  |
| 7                | 1                | 0              | 2.591893                | 1.913635  | 0.800690  |
| 8                | 1                | 0              | 0.151651                | 2.194581  | 0.787967  |
| 9                | 1                | 0              | -0.283014               | -1.754706 | -0.875469 |
| 10               | 1                | 0              | 2.154021                | -2.055790 | -0.783254 |
| 11               | 6                | 0              | -1.722720               | 0.422510  | -0.085352 |
| 12               | 6                | 0              | -2.560779               | -0.667430 | 0.162536  |
| 13               | 1                | 0              | -2.119575               | -1.628376 | 0.419190  |
| 14               | 6                | 0              | -2.274259               | 1.705717  | -0.389898 |
| 15               | 1                | 0              | -1.552835               | 2.506597  | -0.616813 |
| 16               | 1                | 0              | -4.324692               | 0.233479  | -0.083992 |
| 17               | 7                | 0              | -3.876584               | -0.650900 | 0.144246  |
| 18               | 6                | 0              | -4.710685               | -1.801434 | 0.449711  |
| 19               | 1                | 0              | -5.331530               | -2.051235 | -0.412110 |
| 20               | 1                | 0              | -4.076338               | -2.652149 | 0.695059  |
| 21               | 1                | 0              | -5.356876               | -1.576866 | 1.299700  |
| 22               | 8                | 0              | -3.484726               | 1.966652  | -0.444415 |
| 23               | 7                | 0              | 3.944852                | -0.257667 | 0.042139  |
| 24               | 8                | 0              | 4.637545                | 0.695909  | 0.351428  |
| 25               | 8                | 0              | 4.405510                | -1.349108 | -0.243236 |

### Structure 33b (vacuum)

Energy (Hartrees): -722.049771549  
No imaginary frequencies

Standard orientation:

| Center<br>Number | Atomic<br>Number | Atomic<br>Type | Coordinates (Angstroms) |           |           |
|------------------|------------------|----------------|-------------------------|-----------|-----------|
|                  |                  |                | X                       | Y         | Z         |
| 1                | 6                | 0              | -1.746738               | -1.080483 | 0.665712  |
| 2                | 6                | 0              | -0.375874               | -1.281332 | 0.621547  |
| 3                | 6                | 0              | 0.461309                | -0.421215 | -0.104749 |
| 4                | 6                | 0              | -0.124994               | 0.650234  | -0.797414 |
| 5                | 6                | 0              | -1.492502               | 0.873590  | -0.753075 |
| 6                | 6                | 0              | -2.281309               | 0.001655  | -0.017536 |
| 7                | 1                | 0              | -2.399781               | -1.733382 | 1.229227  |
| 8                | 1                | 0              | 0.058696                | -2.104579 | 1.176499  |
| 9                | 1                | 0              | 0.498156                | 1.291086  | -1.411881 |
| 10               | 1                | 0              | -1.955497               | 1.692358  | -1.287498 |
| 11               | 6                | 0              | 1.914283                | -0.654220 | -0.150266 |
| 12               | 6                | 0              | 2.849246                | 0.327195  | 0.018675  |
| 13               | 1                | 0              | 3.891254                | 0.019817  | -0.038513 |
| 14               | 6                | 0              | 2.427303                | -2.011404 | -0.363621 |
| 15               | 1                | 0              | 1.647124                | -2.781893 | -0.519861 |
| 16               | 1                | 0              | 1.695678                | 1.937079  | 0.426846  |
| 17               | 7                | 0              | 2.644745                | 1.630780  | 0.262470  |
| 18               | 6                | 0              | 3.713271                | 2.548858  | 0.616275  |
| 19               | 1                | 0              | 3.797934                | 2.675091  | 1.699030  |
| 20               | 1                | 0              | 4.655156                | 2.155847  | 0.235015  |
| 21               | 1                | 0              | 3.537111                | 3.522077  | 0.157420  |
| 22               | 8                | 0              | 3.598412                | -2.321298 | -0.393007 |
| 23               | 7                | 0              | -3.736290               | 0.232388  | 0.038104  |
| 24               | 8                | 0              | -4.406979               | -0.563140 | 0.659878  |
| 25               | 8                | 0              | -4.172557               | 1.205320  | -0.539820 |

### Structure 33b (CHCl<sub>3</sub>)

Energy (Hartrees): -722.072783738  
No imaginary frequencies

Standard orientation:

| Center<br>Number | Atomic<br>Number | Atomic<br>Type | Coordinates (Angstroms) |           |           |
|------------------|------------------|----------------|-------------------------|-----------|-----------|
|                  |                  |                | X                       | Y         | Z         |
| 1                | 6                | 0              | -1.762334               | -1.093774 | 0.635856  |
| 2                | 6                | 0              | -0.392300               | -1.295946 | 0.598559  |
| 3                | 6                | 0              | 0.456292                | -0.412506 | -0.088979 |
| 4                | 6                | 0              | -0.120611               | 0.689654  | -0.742688 |
| 5                | 6                | 0              | -1.486674               | 0.915291  | -0.704033 |
| 6                | 6                | 0              | -2.287899               | 0.015764  | -0.013002 |
| 7                | 1                | 0              | -2.414409               | -1.771674 | 1.170584  |
| 8                | 1                | 0              | 0.031546                | -2.141938 | 1.127322  |
| 9                | 1                | 0              | 0.504945                | 1.358141  | -1.323792 |
| 10               | 1                | 0              | -1.931144               | 1.759633  | -1.214150 |
| 11               | 6                | 0              | 1.906197                | -0.661073 | -0.139001 |
| 12               | 6                | 0              | 2.866357                | 0.312490  | 0.037714  |
| 13               | 1                | 0              | 3.903897                | -0.003499 | -0.043587 |
| 14               | 6                | 0              | 2.386446                | -2.012242 | -0.369139 |
| 15               | 1                | 0              | 1.593250                | -2.762609 | -0.544964 |
| 16               | 1                | 0              | 1.750919                | 1.942411  | 0.471163  |
| 17               | 7                | 0              | 2.691459                | 1.594972  | 0.331539  |
| 18               | 6                | 0              | 3.776699                | 2.539590  | 0.538466  |
| 19               | 1                | 0              | 3.716739                | 2.970444  | 1.539375  |
| 20               | 1                | 0              | 4.726279                | 2.016469  | 0.434527  |
| 21               | 1                | 0              | 3.730763                | 3.342439  | -0.199916 |
| 22               | 8                | 0              | 3.556738                | -2.362826 | -0.401674 |
| 23               | 7                | 0              | -3.735990               | 0.244124  | 0.029741  |
| 24               | 8                | 0              | -4.426870               | -0.573082 | 0.605586  |
| 25               | 8                | 0              | -4.174130               | 1.240036  | -0.512418 |

### Structure 33b (DMSO)

Energy (Hartrees): -722.074148813  
No imaginary frequencies

Standard orientation:

| Center<br>Number | Atomic<br>Number | Atomic<br>Type | Coordinates (Angstroms) |           |           |
|------------------|------------------|----------------|-------------------------|-----------|-----------|
|                  |                  |                | X                       | Y         | Z         |
| 1                | 6                | 0              | -1.769876               | -1.101984 | 0.617273  |
| 2                | 6                | 0              | -0.400114               | -1.303922 | 0.583826  |
| 3                | 6                | 0              | 0.454683                | -0.405765 | -0.079284 |
| 4                | 6                | 0              | -0.118300               | 0.712530  | -0.709964 |
| 5                | 6                | 0              | -1.484321               | 0.936823  | -0.675474 |
| 6                | 6                | 0              | -2.291605               | 0.022242  | -0.010561 |
| 7                | 1                | 0              | -2.422244               | -1.793950 | 1.133092  |
| 8                | 1                | 0              | 0.017663                | -2.162520 | 1.096731  |
| 9                | 1                | 0              | 0.507807                | 1.400189  | -1.267077 |
| 10               | 1                | 0              | -1.920112               | 1.794721  | -1.169923 |
| 11               | 6                | 0              | 1.902202                | -0.661704 | -0.130548 |
| 12               | 6                | 0              | 2.873900                | 0.306745  | 0.041322  |
| 13               | 1                | 0              | 3.908084                | -0.016708 | -0.049568 |
| 14               | 6                | 0              | 2.366894                | -2.014412 | -0.368499 |
| 15               | 1                | 0              | 1.563306                | -2.752084 | -0.550252 |
| 16               | 1                | 0              | 1.780210                | 1.950609  | 0.481899  |
| 17               | 7                | 0              | 2.714787                | 1.585983  | 0.339804  |
| 18               | 6                | 0              | 3.811035                | 2.524983  | 0.513915  |
| 19               | 1                | 0              | 3.747190                | 2.993998  | 1.496651  |
| 20               | 1                | 0              | 4.754509                | 1.987045  | 0.434488  |
| 21               | 1                | 0              | 3.773770                | 3.299855  | -0.254011 |
| 22               | 8                | 0              | 3.532960                | -2.383855 | -0.406355 |
| 23               | 7                | 0              | -3.738012               | 0.249886  | 0.026303  |
| 24               | 8                | 0              | -4.434868               | -0.573501 | 0.589107  |
| 25               | 8                | 0              | -4.174917               | 1.251674  | -0.508604 |

### Structure 33b (C<sub>2</sub>H<sub>5</sub>OH)

Energy (Hartrees): -722.075656085  
No imaginary frequencies

Standard orientation:

| Center<br>Number | Atomic<br>Number | Atomic<br>Type | Coordinates (Angstroms) |           |           |
|------------------|------------------|----------------|-------------------------|-----------|-----------|
|                  |                  |                | X                       | Y         | Z         |
| 1                | 6                | 0              | -1.762136               | -1.091158 | 0.638134  |
| 2                | 6                | 0              | -0.392898               | -1.292797 | 0.599351  |
| 3                | 6                | 0              | 0.455009                | -0.407983 | -0.088854 |
| 4                | 6                | 0              | -0.120987               | 0.696250  | -0.740299 |
| 5                | 6                | 0              | -1.486802               | 0.920205  | -0.702931 |
| 6                | 6                | 0              | -2.287495               | 0.019047  | -0.011693 |
| 7                | 1                | 0              | -2.410235               | -1.771551 | 1.174397  |
| 8                | 1                | 0              | 0.029988                | -2.139658 | 1.127447  |
| 9                | 1                | 0              | 0.502090                | 1.371394  | -1.316001 |
| 10               | 1                | 0              | -1.926427               | 1.766325  | -1.214217 |
| 11               | 6                | 0              | 1.904045                | -0.661848 | -0.141513 |
| 12               | 6                | 0              | 2.873364                | 0.312750  | 0.037808  |
| 13               | 1                | 0              | 3.910449                | -0.002017 | -0.048185 |
| 14               | 6                | 0              | 2.367726                | -2.005748 | -0.371585 |
| 15               | 1                | 0              | 1.571650                | -2.750266 | -0.546122 |
| 16               | 1                | 0              | 1.762704                | 1.944394  | 0.469004  |
| 17               | 7                | 0              | 2.702249                | 1.586327  | 0.339709  |
| 18               | 6                | 0              | 3.791137                | 2.530868  | 0.538149  |
| 19               | 1                | 0              | 3.715594                | 2.981659  | 1.528489  |
| 20               | 1                | 0              | 4.739178                | 2.001757  | 0.456209  |
| 21               | 1                | 0              | 3.752131                | 3.318069  | -0.216696 |
| 22               | 8                | 0              | 3.542219                | -2.376366 | -0.409324 |
| 23               | 7                | 0              | -3.730398               | 0.245079  | 0.029827  |
| 24               | 8                | 0              | -4.425469               | -0.557665 | 0.624912  |
| 25               | 8                | 0              | -4.178733               | 1.226848  | -0.533148 |

### Structure 33c (vacuum)

Energy (Hartrees): -722.051300692  
No imaginary frequencies

Standard orientation:

| Center<br>Number | Atomic<br>Number | Atomic<br>Type | Coordinates (Angstroms) |           |           |
|------------------|------------------|----------------|-------------------------|-----------|-----------|
|                  |                  |                | X                       | Y         | Z         |
| 1                | 6                | 0              | 1.654712                | 0.980899  | 0.683659  |
| 2                | 6                | 0              | 0.294125                | 1.239462  | 0.625721  |
| 3                | 6                | 0              | -0.562026               | 0.408496  | -0.109206 |
| 4                | 6                | 0              | -0.013275               | -0.674266 | -0.811035 |
| 5                | 6                | 0              | 1.345948                | -0.946695 | -0.761528 |
| 6                | 6                | 0              | 2.155713                | -0.113987 | -0.005457 |
| 7                | 1                | 0              | 2.327078                | 1.609168  | 1.252152  |
| 8                | 1                | 0              | -0.114029               | 2.096930  | 1.143305  |
| 9                | 1                | 0              | -0.654499               | -1.288419 | -1.434210 |
| 10               | 1                | 0              | 1.783894                | -1.773999 | -1.303457 |
| 11               | 6                | 0              | -2.011569               | 0.679892  | -0.160251 |
| 12               | 6                | 0              | -2.964094               | -0.285382 | -0.015732 |
| 13               | 1                | 0              | -4.008053               | 0.016703  | -0.077032 |
| 14               | 6                | 0              | -2.509594               | 2.043515  | -0.328706 |
| 15               | 1                | 0              | -3.615565               | 2.115134  | -0.393778 |
| 16               | 1                | 0              | -1.843008               | -1.913682 | 0.401410  |
| 17               | 7                | 0              | -2.784171               | -1.601818 | 0.204980  |
| 18               | 6                | 0              | -3.872229               | -2.481264 | 0.596466  |
| 19               | 1                | 0              | -4.050417               | -2.462692 | 1.675637  |
| 20               | 1                | 0              | -4.783243               | -2.172385 | 0.083344  |
| 21               | 1                | 0              | -3.643003               | -3.502190 | 0.292949  |
| 22               | 8                | 0              | -1.831426               | 3.042288  | -0.394808 |
| 23               | 7                | 0              | 3.601772                | -0.399497 | 0.060159  |
| 24               | 8                | 0              | 4.010102                | -1.369082 | -0.543701 |
| 25               | 8                | 0              | 4.292744                | 0.349371  | 0.716022  |

### Structure 33c (CHCl<sub>3</sub>)

Energy (Hartrees): -722.075059251  
No imaginary frequencies

Standard orientation:

| Center<br>Number | Atomic<br>Number | Atomic<br>Type | Coordinates (Angstroms) |           |           |
|------------------|------------------|----------------|-------------------------|-----------|-----------|
|                  |                  |                | X                       | Y         | Z         |
| 1                | 6                | 0              | 1.672135                | 0.967823  | 0.695507  |
| 2                | 6                | 0              | 0.312220                | 1.227438  | 0.648364  |
| 3                | 6                | 0              | -0.555741               | 0.402062  | -0.082280 |
| 4                | 6                | 0              | -0.015369               | -0.688400 | -0.780667 |
| 5                | 6                | 0              | 1.342573                | -0.964933 | -0.741774 |
| 6                | 6                | 0              | 2.164641                | -0.129239 | 0.000484  |
| 7                | 1                | 0              | 2.342942                | 1.599120  | 1.262917  |
| 8                | 1                | 0              | -0.086594               | 2.079321  | 1.183238  |
| 9                | 1                | 0              | -0.659702               | -1.311411 | -1.391257 |
| 10               | 1                | 0              | 1.761885                | -1.800361 | -1.286392 |
| 11               | 6                | 0              | -2.000462               | 0.695158  | -0.131997 |
| 12               | 6                | 0              | -2.982541               | -0.257567 | 0.020739  |
| 13               | 1                | 0              | -4.018137               | 0.069002  | -0.052235 |
| 14               | 6                | 0              | -2.475060               | 2.047911  | -0.331339 |
| 15               | 1                | 0              | -3.578096               | 2.139523  | -0.369558 |
| 16               | 1                | 0              | -1.904063               | -1.919752 | 0.427492  |
| 17               | 7                | 0              | -2.835738               | -1.556277 | 0.271266  |
| 18               | 6                | 0              | -3.946044               | -2.461701 | 0.517415  |
| 19               | 1                | 0              | -4.042744               | -2.684192 | 1.582749  |
| 20               | 1                | 0              | -4.866932               | -1.997576 | 0.166043  |
| 21               | 1                | 0              | -3.793225               | -3.393082 | -0.028621 |
| 22               | 8                | 0              | -1.783828               | 3.044529  | -0.462511 |
| 23               | 7                | 0              | 3.604475                | -0.412796 | 0.048262  |
| 24               | 8                | 0              | 4.016213                | -1.384881 | -0.554329 |
| 25               | 8                | 0              | 4.313290                | 0.336802  | 0.689617  |

### Structure 33c (DMSO)

Energy (Hartrees): -722.077195743  
No imaginary frequencies

Standard orientation:

| Center<br>Number | Atomic<br>Number | Atomic<br>Type | Coordinates (Angstroms) |           |           |
|------------------|------------------|----------------|-------------------------|-----------|-----------|
|                  |                  |                | X                       | Y         | Z         |
| 1                | 6                | 0              | 1.671438                | 0.958846  | 0.709611  |
| 2                | 6                | 0              | 0.311895                | 1.218756  | 0.662038  |
| 3                | 6                | 0              | -0.556712               | 0.400832  | -0.077322 |
| 4                | 6                | 0              | -0.016067               | -0.684831 | -0.783161 |
| 5                | 6                | 0              | 1.342363                | -0.959650 | -0.747877 |
| 6                | 6                | 0              | 2.165088                | -0.130443 | 0.001855  |
| 7                | 1                | 0              | 2.338522                | 1.584504  | 1.287812  |
| 8                | 1                | 0              | -0.087561               | 2.062468  | 1.209653  |
| 9                | 1                | 0              | -0.659698               | -1.310243 | -1.392167 |
| 10               | 1                | 0              | 1.757349                | -1.793309 | -1.298701 |
| 11               | 6                | 0              | -1.999945               | 0.698840  | -0.121274 |
| 12               | 6                | 0              | -2.987478               | -0.252923 | 0.044644  |
| 13               | 1                | 0              | -4.022220               | 0.077020  | -0.025839 |
| 14               | 6                | 0              | -2.470642               | 2.046920  | -0.332551 |
| 15               | 1                | 0              | -3.573675               | 2.140180  | -0.349909 |
| 16               | 1                | 0              | -1.907938               | -1.919865 | 0.428492  |
| 17               | 7                | 0              | -2.840936               | -1.542075 | 0.315307  |
| 18               | 6                | 0              | -3.945927               | -2.471287 | 0.485053  |
| 19               | 1                | 0              | -3.868248               | -2.970390 | 1.452011  |
| 20               | 1                | 0              | -4.883599               | -1.918669 | 0.443372  |
| 21               | 1                | 0              | -3.937359               | -3.223668 | -0.306113 |
| 22               | 8                | 0              | -1.780184               | 3.042182  | -0.502407 |
| 23               | 7                | 0              | 3.603810                | -0.411580 | 0.045505  |
| 24               | 8                | 0              | 4.029081                | -1.331937 | -0.626578 |
| 25               | 8                | 0              | 4.303632                | 0.289406  | 0.751437  |

### Structure 33c (C<sub>2</sub>H<sub>5</sub>OH)

Energy (Hartrees): -722.079017254  
No imaginary frequencies

Standard orientation:

| Center<br>Number | Atomic<br>Number | Atomic<br>Type | Coordinates (Angstroms) |           |           |
|------------------|------------------|----------------|-------------------------|-----------|-----------|
|                  |                  |                | X                       | Y         | Z         |
| 1                | 6                | 0              | 1.666465                | 0.946114  | 0.730780  |
| 2                | 6                | 0              | 0.306738                | 1.204539  | 0.686249  |
| 3                | 6                | 0              | -0.556655               | 0.405546  | -0.078993 |
| 4                | 6                | 0              | -0.014200               | -0.661391 | -0.810902 |
| 5                | 6                | 0              | 1.343184                | -0.939225 | -0.773998 |
| 6                | 6                | 0              | 2.161284                | -0.127066 | -0.000332 |
| 7                | 1                | 0              | 2.329992                | 1.557478  | 1.328067  |
| 8                | 1                | 0              | -0.095379               | 2.028875  | 1.261656  |
| 9                | 1                | 0              | -0.655841               | -1.268989 | -1.439790 |
| 10               | 1                | 0              | 1.760940                | -1.757892 | -1.344943 |
| 11               | 6                | 0              | -2.001602               | 0.701269  | -0.121693 |
| 12               | 6                | 0              | -2.987238               | -0.256904 | 0.044847  |
| 13               | 1                | 0              | -4.023760               | 0.067740  | -0.021565 |
| 14               | 6                | 0              | -2.475957               | 2.038579  | -0.328963 |
| 15               | 1                | 0              | -3.576009               | 2.138422  | -0.342799 |
| 16               | 1                | 0              | -1.893283               | -1.914866 | 0.413408  |
| 17               | 7                | 0              | -2.830321               | -1.542400 | 0.312046  |
| 18               | 6                | 0              | -3.929480               | -2.478952 | 0.489539  |
| 19               | 1                | 0              | -3.841115               | -2.977277 | 1.455817  |
| 20               | 1                | 0              | -4.870584               | -1.932092 | 0.454351  |
| 21               | 1                | 0              | -3.920877               | -3.231087 | -0.301637 |
| 22               | 8                | 0              | -1.781833               | 3.040869  | -0.501560 |
| 23               | 7                | 0              | 3.596066                | -0.410428 | 0.045498  |
| 24               | 8                | 0              | 4.014374                | -1.378438 | -0.561866 |
| 25               | 8                | 0              | 4.311268                | 0.333122  | 0.690356  |

### Structure 33d (vacuum)

Energy (Hartrees): -722.043792130  
No imaginary frequencies

Standard orientation:

| Center<br>Number | Atomic<br>Number | Atomic<br>Type | Coordinates (Angstroms) |           |           |
|------------------|------------------|----------------|-------------------------|-----------|-----------|
|                  |                  |                | X                       | Y         | Z         |
| 1                | 6                | 0              | 1.838072                | 0.999777  | 0.545664  |
| 2                | 6                | 0              | 0.469034                | 1.202748  | 0.487479  |
| 3                | 6                | 0              | -0.376332               | 0.242213  | -0.087802 |
| 4                | 6                | 0              | 0.199435                | -0.914020 | -0.632646 |
| 5                | 6                | 0              | 1.566692                | -1.136183 | -0.573485 |
| 6                | 6                | 0              | 2.364769                | -0.172175 | 0.021052  |
| 7                | 1                | 0              | 2.499429                | 1.729103  | 0.993475  |
| 8                | 1                | 0              | 0.048104                | 2.113309  | 0.890406  |
| 9                | 1                | 0              | -0.429008               | -1.638369 | -1.137627 |
| 10               | 1                | 0              | 2.018176                | -2.025139 | -0.992378 |
| 11               | 6                | 0              | -1.841734               | 0.430055  | -0.109307 |
| 12               | 6                | 0              | -2.653020               | -0.651238 | 0.106113  |
| 13               | 1                | 0              | -2.183510               | -1.591619 | 0.389037  |
| 14               | 6                | 0              | -2.415099               | 1.756302  | -0.318062 |
| 15               | 1                | 0              | -3.520529               | 1.815446  | -0.241856 |
| 16               | 1                | 0              | -4.521302               | 0.072480  | -0.263592 |
| 17               | 7                | 0              | -3.994793               | -0.744114 | 0.003923  |
| 18               | 6                | 0              | -4.741586               | -1.848236 | 0.580574  |
| 19               | 1                | 0              | -5.642906               | -2.027656 | -0.004767 |
| 20               | 1                | 0              | -4.126963               | -2.748474 | 0.545532  |
| 21               | 1                | 0              | -5.022962               | -1.657534 | 1.620262  |
| 22               | 8                | 0              | -1.795165               | 2.770474  | -0.542774 |
| 23               | 7                | 0              | 3.820025                | -0.394426 | 0.085925  |
| 24               | 8                | 0              | 4.251724                | -1.430773 | -0.374269 |
| 25               | 8                | 0              | 4.498875                | 0.469396  | 0.598929  |

### Structure 33d (CHCl<sub>3</sub>)

Energy (Hartrees): -722.068871684  
No imaginary frequencies

Standard orientation:

| Center<br>Number | Atomic<br>Number | Atomic<br>Type | Coordinates (Angstroms) |           |           |
|------------------|------------------|----------------|-------------------------|-----------|-----------|
|                  |                  |                | X                       | Y         | Z         |
| 1                | 6                | 0              | 1.857563                | 1.023711  | 0.493640  |
| 2                | 6                | 0              | 0.489088                | 1.227599  | 0.452664  |
| 3                | 6                | 0              | -0.377471               | 0.243964  | -0.056325 |
| 4                | 6                | 0              | 0.187478                | -0.946329 | -0.545342 |
| 5                | 6                | 0              | 1.553183                | -1.171734 | -0.498835 |
| 6                | 6                | 0              | 2.370947                | -0.178352 | 0.021680  |
| 7                | 1                | 0              | 2.522073                | 1.778191  | 0.893270  |
| 8                | 1                | 0              | 0.084072                | 2.157205  | 0.827514  |
| 9                | 1                | 0              | -0.449118               | -1.699948 | -0.993661 |
| 10               | 1                | 0              | 1.982692                | -2.089164 | -0.878953 |
| 11               | 6                | 0              | -1.837468               | 0.445149  | -0.070533 |
| 12               | 6                | 0              | -2.664823               | -0.644265 | 0.135881  |
| 13               | 1                | 0              | -2.206645               | -1.586696 | 0.429637  |
| 14               | 6                | 0              | -2.408907               | 1.760858  | -0.266566 |
| 15               | 1                | 0              | -3.506839               | 1.825370  | -0.148918 |
| 16               | 1                | 0              | -4.509857               | 0.091127  | -0.289266 |
| 17               | 7                | 0              | -3.989375               | -0.717251 | 0.022614  |
| 18               | 6                | 0              | -4.769218               | -1.862225 | 0.464705  |
| 19               | 1                | 0              | -5.566453               | -2.058558 | -0.251994 |
| 20               | 1                | 0              | -4.120761               | -2.736755 | 0.518882  |
| 21               | 1                | 0              | -5.209449               | -1.685626 | 1.449162  |
| 22               | 8                | 0              | -1.795611               | 2.782421  | -0.529922 |
| 23               | 7                | 0              | 3.817792                | -0.400620 | 0.063465  |
| 24               | 8                | 0              | 4.241604                | -1.482391 | -0.296658 |
| 25               | 8                | 0              | 4.526398                | 0.504932  | 0.458575  |

### Structure 33d (DMSO)

Energy (Hartrees): -722.071538411  
No imaginary frequencies

Standard orientation:

| Center<br>Number | Atomic<br>Number | Atomic<br>Type | Coordinates (Angstroms) |           |           |
|------------------|------------------|----------------|-------------------------|-----------|-----------|
|                  |                  |                | X                       | Y         | Z         |
| 1                | 6                | 0              | 1.860046                | 1.031989  | 0.474172  |
| 2                | 6                | 0              | 0.492200                | 1.238161  | 0.432701  |
| 3                | 6                | 0              | -0.380396               | 0.249568  | -0.060370 |
| 4                | 6                | 0              | 0.183139                | -0.950350 | -0.531953 |
| 5                | 6                | 0              | 1.548107                | -1.176842 | -0.485707 |
| 6                | 6                | 0              | 2.371335                | -0.178012 | 0.018261  |
| 7                | 1                | 0              | 2.523770                | 1.791161  | 0.866538  |
| 8                | 1                | 0              | 0.091314                | 2.172460  | 0.800123  |
| 9                | 1                | 0              | -0.454240               | -1.713813 | -0.962090 |
| 10               | 1                | 0              | 1.970401                | -2.103001 | -0.852775 |
| 11               | 6                | 0              | -1.837713               | 0.453332  | -0.069475 |
| 12               | 6                | 0              | -2.663958               | -0.645077 | 0.132890  |
| 13               | 1                | 0              | -2.199559               | -1.591574 | 0.401689  |
| 14               | 6                | 0              | -2.413116               | 1.765725  | -0.255512 |
| 15               | 1                | 0              | -3.510575               | 1.823933  | -0.139264 |
| 16               | 1                | 0              | -4.516165               | 0.099812  | -0.230640 |
| 17               | 7                | 0              | -3.984345               | -0.714899 | 0.047793  |
| 18               | 6                | 0              | -4.754345               | -1.885032 | 0.440205  |
| 19               | 1                | 0              | -5.517225               | -2.088079 | -0.311395 |
| 20               | 1                | 0              | -4.086322               | -2.742628 | 0.514220  |
| 21               | 1                | 0              | -5.238601               | -1.724938 | 1.406177  |
| 22               | 8                | 0              | -1.805118               | 2.794102  | -0.518584 |
| 23               | 7                | 0              | 3.814989                | -0.402905 | 0.063071  |
| 24               | 8                | 0              | 4.239228                | -1.488704 | -0.288669 |
| 25               | 8                | 0              | 4.527253                | 0.504669  | 0.452268  |

### Structure 33d (C<sub>2</sub>H<sub>5</sub>OH)

Energy (Hartrees): -722.072988548  
No imaginary frequencies

Standard orientation:

| Center<br>Number | Atomic<br>Number | Atomic<br>Type | Coordinates (Angstroms) |           |           |
|------------------|------------------|----------------|-------------------------|-----------|-----------|
|                  |                  |                | X                       | Y         | Z         |
| 1                | 6                | 0              | 1.861096                | 1.026300  | 0.493938  |
| 2                | 6                | 0              | 0.493650                | 1.233021  | 0.458701  |
| 3                | 6                | 0              | -0.378765               | 0.252616  | -0.049822 |
| 4                | 6                | 0              | 0.180655                | -0.942051 | -0.537945 |
| 5                | 6                | 0              | 1.544911                | -1.171204 | -0.496848 |
| 6                | 6                | 0              | 2.368627                | -0.178174 | 0.018655  |
| 7                | 1                | 0              | 2.525790                | 1.777924  | 0.899207  |
| 8                | 1                | 0              | 0.093565                | 2.158482  | 0.849457  |
| 9                | 1                | 0              | -0.459891               | -1.697468 | -0.977798 |
| 10               | 1                | 0              | 1.965430                | -2.092384 | -0.878381 |
| 11               | 6                | 0              | -1.836276               | 0.458083  | -0.060315 |
| 12               | 6                | 0              | -2.665110               | -0.641139 | 0.150940  |
| 13               | 1                | 0              | -2.201838               | -1.579732 | 0.447890  |
| 14               | 6                | 0              | -2.407749               | 1.760997  | -0.258813 |
| 15               | 1                | 0              | -3.502566               | 1.830067  | -0.141744 |
| 16               | 1                | 0              | -4.506750               | 0.091285  | -0.272921 |
| 17               | 7                | 0              | -3.980625               | -0.713665 | 0.044047  |
| 18               | 6                | 0              | -4.759627               | -1.881248 | 0.429551  |
| 19               | 1                | 0              | -5.436650               | -2.154812 | -0.380097 |
| 20               | 1                | 0              | -4.082765               | -2.711062 | 0.628629  |
| 21               | 1                | 0              | -5.343152               | -1.671302 | 1.328152  |
| 22               | 8                | 0              | -1.793291               | 2.790385  | -0.535453 |
| 23               | 7                | 0              | 3.807947                | -0.405157 | 0.057564  |
| 24               | 8                | 0              | 4.231011                | -1.499210 | -0.271976 |
| 25               | 8                | 0              | 4.530917                | 0.506020  | 0.419689  |

### Structure 33e (vacuum)

Energy (Hartrees): -722.041527908  
No imaginary frequencies

Standard orientation:

| Center<br>Number | Atomic<br>Number | Atomic<br>Type | Coordinates (Angstroms) |           |           |
|------------------|------------------|----------------|-------------------------|-----------|-----------|
|                  |                  |                | X                       | Y         | Z         |
| 1                | 6                | 0              | -1.794867               | 1.068128  | -0.442827 |
| 2                | 6                | 0              | -0.412694               | 1.156015  | -0.447895 |
| 3                | 6                | 0              | 0.378546                | 0.076806  | -0.026963 |
| 4                | 6                | 0              | -0.263031               | -1.082256 | 0.429955  |
| 5                | 6                | 0              | -1.646027               | -1.189381 | 0.434694  |
| 6                | 6                | 0              | -2.389681               | -0.107812 | -0.006795 |
| 7                | 1                | 0              | -2.415150               | 1.890238  | -0.773170 |
| 8                | 1                | 0              | 0.060367                | 2.069030  | -0.781282 |
| 9                | 1                | 0              | 0.329598                | -1.903849 | 0.815319  |
| 10               | 1                | 0              | -2.148443               | -2.079593 | 0.787998  |
| 11               | 6                | 0              | 1.858451                | 0.141088  | -0.078350 |
| 12               | 6                | 0              | 2.523816                | -0.975431 | -0.512649 |
| 13               | 1                | 0              | 1.912247                | -1.772595 | -0.928635 |
| 14               | 6                | 0              | 2.530010                | 1.402767  | 0.243439  |
| 15               | 1                | 0              | 3.611905                | 1.441850  | 0.038026  |
| 16               | 1                | 0              | 4.075248                | -2.157098 | -0.963612 |
| 17               | 7                | 0              | 3.835974                | -1.292240 | -0.509241 |
| 18               | 6                | 0              | 4.905197                | -0.627530 | 0.211399  |
| 19               | 1                | 0              | 5.696620                | -1.352143 | 0.400417  |
| 20               | 1                | 0              | 5.328853                | 0.210454  | -0.346877 |
| 21               | 1                | 0              | 4.527593                | -0.262257 | 1.169435  |
| 22               | 8                | 0              | 1.974828                | 2.393358  | 0.664469  |
| 23               | 7                | 0              | -3.860489               | -0.206209 | -0.000646 |
| 24               | 8                | 0              | -4.490153               | 0.753500  | -0.390992 |
| 25               | 8                | 0              | -4.352870               | -1.243015 | 0.392466  |

### Structure 33e (CHCl<sub>3</sub>)

Energy (Hartrees): -722.066587372  
No imaginary frequencies

Standard orientation:

| Center<br>Number | Atomic<br>Number | Atomic<br>Type | Coordinates (Angstroms) |           |           |
|------------------|------------------|----------------|-------------------------|-----------|-----------|
|                  |                  |                | X                       | Y         | Z         |
| 1                | 6                | 0              | -1.798978               | 1.074393  | -0.433324 |
| 2                | 6                | 0              | -0.417618               | 1.160915  | -0.442057 |
| 3                | 6                | 0              | 0.380055                | 0.079113  | -0.031676 |
| 4                | 6                | 0              | -0.262569               | -1.087516 | 0.412097  |
| 5                | 6                | 0              | -1.644505               | -1.194940 | 0.418896  |
| 6                | 6                | 0              | -2.393152               | -0.107010 | -0.005307 |
| 7                | 1                | 0              | -2.411933               | 1.903283  | -0.761477 |
| 8                | 1                | 0              | 0.050884                | 2.073464  | -0.784062 |
| 9                | 1                | 0              | 0.327877                | -1.918649 | 0.780004  |
| 10               | 1                | 0              | -2.135571               | -2.094971 | 0.764274  |
| 11               | 6                | 0              | 1.856935                | 0.148351  | -0.083725 |
| 12               | 6                | 0              | 2.528994                | -0.989721 | -0.490093 |
| 13               | 1                | 0              | 1.920446                | -1.792335 | -0.900005 |
| 14               | 6                | 0              | 2.530257                | 1.399555  | 0.217561  |
| 15               | 1                | 0              | 3.608114                | 1.433772  | 0.003471  |
| 16               | 1                | 0              | 4.060580                | -2.193775 | -0.889551 |
| 17               | 7                | 0              | 3.824728                | -1.309795 | -0.463659 |
| 18               | 6                | 0              | 4.912235                | -0.615037 | 0.202779  |
| 19               | 1                | 0              | 5.705309                | -1.336354 | 0.395051  |
| 20               | 1                | 0              | 5.319141                | 0.195131  | -0.406145 |
| 21               | 1                | 0              | 4.562873                | -0.210226 | 1.155477  |
| 22               | 8                | 0              | 1.986890                | 2.406134  | 0.644933  |
| 23               | 7                | 0              | -3.855694               | -0.205308 | 0.004148  |
| 24               | 8                | 0              | -4.497682               | 0.770155  | -0.333057 |
| 25               | 8                | 0              | -4.356818               | -1.259068 | 0.346704  |



### Structure 33e (DMSO)

Energy (Hartrees): -722.069129458

No imaginary frequencies

Standard orientation:

| Center<br>Number | Atomic<br>Number | Atomic<br>Type | Coordinates (Angstroms) |           |           |
|------------------|------------------|----------------|-------------------------|-----------|-----------|
|                  |                  |                | X                       | Y         | Z         |
| 1                | 6                | 0              | -1.799589               | 1.078879  | -0.421394 |
| 2                | 6                | 0              | -0.418465               | 1.164291  | -0.430490 |
| 3                | 6                | 0              | 0.381598                | 0.076939  | -0.035386 |
| 4                | 6                | 0              | -0.262785               | -1.097085 | 0.390003  |
| 5                | 6                | 0              | -1.644526               | -1.202321 | 0.399071  |
| 6                | 6                | 0              | -2.395009               | -0.107521 | -0.006630 |
| 7                | 1                | 0              | -2.409348               | 1.913933  | -0.740289 |
| 8                | 1                | 0              | 0.048799                | 2.080354  | -0.764405 |
| 9                | 1                | 0              | 0.325411                | -1.938028 | 0.738848  |
| 10               | 1                | 0              | -2.131558               | -2.109590 | 0.731430  |
| 11               | 6                | 0              | 1.856103                | 0.149536  | -0.085520 |
| 12               | 6                | 0              | 2.531855                | -0.994710 | -0.486017 |
| 13               | 1                | 0              | 1.927357                | -1.799948 | -0.896442 |
| 14               | 6                | 0              | 2.529860                | 1.398985  | 0.207613  |
| 15               | 1                | 0              | 3.605313                | 1.430738  | -0.016579 |
| 16               | 1                | 0              | 4.059694                | -2.201387 | -0.867191 |
| 17               | 7                | 0              | 3.822348                | -1.311518 | -0.451089 |
| 18               | 6                | 0              | 4.910922                | -0.610097 | 0.207120  |
| 19               | 1                | 0              | 5.700789                | -1.332313 | 0.407381  |
| 20               | 1                | 0              | 5.318107                | 0.190166  | -0.414374 |
| 21               | 1                | 0              | 4.561299                | -0.190384 | 1.153230  |
| 22               | 8                | 0              | 1.993869                | 2.409463  | 0.642823  |
| 23               | 7                | 0              | -3.855402               | -0.203251 | 0.007633  |
| 24               | 8                | 0              | -4.498572               | 0.768190  | -0.344461 |
| 25               | 8                | 0              | -4.359580               | -1.250344 | 0.369433  |

### Structure 33e (C<sub>2</sub>H<sub>5</sub>OH)

Energy (Hartrees): -722.070772623

No imaginary frequencies

Standard orientation:

| Center<br>Number | Atomic<br>Number | Atomic<br>Type | Coordinates (Angstroms) |           |           |
|------------------|------------------|----------------|-------------------------|-----------|-----------|
|                  |                  |                | X                       | Y         | Z         |
| 1                | 6                | 0              | -1.799240               | 1.067651  | -0.457323 |
| 2                | 6                | 0              | -0.418600               | 1.154086  | -0.469446 |
| 3                | 6                | 0              | 0.380868                | 0.080208  | -0.039770 |
| 4                | 6                | 0              | -0.259036               | -1.083519 | 0.417019  |
| 5                | 6                | 0              | -1.640293               | -1.192046 | 0.427264  |
| 6                | 6                | 0              | -2.390745               | -0.108643 | -0.008544 |
| 7                | 1                | 0              | -2.410070               | 1.891252  | -0.802949 |
| 8                | 1                | 0              | 0.046714                | 2.058205  | -0.838684 |
| 9                | 1                | 0              | 0.332907                | -1.911608 | 0.789832  |
| 10               | 1                | 0              | -2.125890               | -2.090166 | 0.785816  |
| 11               | 6                | 0              | 1.856551                | 0.154211  | -0.086661 |
| 12               | 6                | 0              | 2.532909                | -0.990863 | -0.492686 |
| 13               | 1                | 0              | 1.926549                | -1.790447 | -0.911576 |
| 14               | 6                | 0              | 2.524534                | 1.392806  | 0.222513  |
| 15               | 1                | 0              | 3.601190                | 1.435219  | 0.015246  |
| 16               | 1                | 0              | 4.057503                | -2.198517 | -0.874367 |
| 17               | 7                | 0              | 3.819944                | -1.310348 | -0.454085 |
| 18               | 6                | 0              | 4.909670                | -0.606166 | 0.200772  |
| 19               | 1                | 0              | 5.704845                | -1.324973 | 0.391366  |
| 20               | 1                | 0              | 5.307743                | 0.198735  | -0.420414 |
| 21               | 1                | 0              | 4.564830                | -0.194464 | 1.152000  |
| 22               | 8                | 0              | 1.977310                | 2.403698  | 0.663001  |
| 23               | 7                | 0              | -3.847312               | -0.205395 | 0.008842  |
| 24               | 8                | 0              | -4.496759               | 0.775917  | -0.303997 |
| 25               | 8                | 0              | -4.354858               | -1.263287 | 0.334947  |

### Structure 33f (vacuum)

Energy (Hartrees): -722.044039683  
No imaginary frequencies

Standard orientation:

| Center<br>Number | Atomic<br>Number | Atomic<br>Type | Coordinates (Angstroms) |           |           |
|------------------|------------------|----------------|-------------------------|-----------|-----------|
|                  |                  |                | X                       | Y         | Z         |
| 1                | 6                | 0              | 1.871643                | 1.176519  | 0.242274  |
| 2                | 6                | 0              | 0.487528                | 1.230062  | 0.257026  |
| 3                | 6                | 0              | -0.289157               | 0.087385  | 0.002392  |
| 4                | 6                | 0              | 0.377981                | -1.116456 | -0.273723 |
| 5                | 6                | 0              | 1.761691                | -1.193098 | -0.269607 |
| 6                | 6                | 0              | 2.487818                | -0.039468 | -0.016056 |
| 7                | 1                | 0              | 2.475617                | 2.050302  | 0.446789  |
| 8                | 1                | 0              | 0.001143                | 2.166209  | 0.503465  |
| 9                | 1                | 0              | -0.198597               | -1.998753 | -0.525994 |
| 10               | 1                | 0              | 2.281899                | -2.117723 | -0.480494 |
| 11               | 6                | 0              | -1.762578               | 0.149833  | 0.032872  |
| 12               | 6                | 0              | -2.444594               | -0.906607 | 0.591194  |
| 13               | 1                | 0              | -1.862790               | -1.630698 | 1.158609  |
| 14               | 6                | 0              | -2.399740               | 1.396327  | -0.390310 |
| 15               | 1                | 0              | -1.754482               | 2.054745  | -1.002491 |
| 16               | 1                | 0              | -4.045000               | -1.986638 | 1.095590  |
| 17               | 7                | 0              | -3.746898               | -1.210993 | 0.527270  |
| 18               | 6                | 0              | -4.711722               | -0.704714 | -0.435047 |
| 19               | 1                | 0              | -5.480552               | -1.464684 | -0.571315 |
| 20               | 1                | 0              | -5.155429               | 0.236165  | -0.112669 |
| 21               | 1                | 0              | -4.205495               | -0.533306 | -1.387355 |
| 22               | 8                | 0              | -3.517917               | 1.762888  | -0.090127 |
| 23               | 7                | 0              | 3.959166                | -0.107148 | -0.022150 |
| 24               | 8                | 0              | 4.569720                | 0.921288  | 0.178288  |
| 25               | 8                | 0              | 4.471271                | -1.187593 | -0.226420 |

### Structure 33f (CHCl<sub>3</sub>)

Energy (Hartrees): -722.066593886  
No imaginary frequencies

Standard orientation:

| Center<br>Number | Atomic<br>Number | Atomic<br>Type | Coordinates (Angstroms) |           |           |
|------------------|------------------|----------------|-------------------------|-----------|-----------|
|                  |                  |                | X                       | Y         | Z         |
| 1                | 6                | 0              | -1.872116               | 1.185102  | -0.209975 |
| 2                | 6                | 0              | -0.489367               | 1.241090  | -0.232149 |
| 3                | 6                | 0              | 0.293349                | 0.092312  | -0.013237 |
| 4                | 6                | 0              | -0.372488               | -1.122693 | 0.227727  |
| 5                | 6                | 0              | -1.754890               | -1.201144 | 0.230179  |
| 6                | 6                | 0              | -2.486711               | -0.040223 | 0.017281  |
| 7                | 1                | 0              | -2.469239               | 2.069511  | -0.388530 |
| 8                | 1                | 0              | -0.009186               | 2.186004  | -0.456554 |
| 9                | 1                | 0              | 0.202563                | -2.015380 | 0.443837  |
| 10               | 1                | 0              | -2.262383               | -2.138410 | 0.416326  |
| 11               | 6                | 0              | 1.763456                | 0.158112  | -0.045898 |
| 12               | 6                | 0              | 2.452551                | -0.917434 | -0.583405 |
| 13               | 1                | 0              | 1.885336                | -1.643136 | -1.162772 |
| 14               | 6                | 0              | 2.397293                | 1.406531  | 0.343620  |
| 15               | 1                | 0              | 1.762197                | 2.077598  | 0.950153  |
| 16               | 1                | 0              | 4.047574                | -2.020711 | -1.022489 |
| 17               | 7                | 0              | 3.740786                | -1.226595 | -0.478955 |
| 18               | 6                | 0              | 4.691077                | -0.706829 | 0.488979  |
| 19               | 1                | 0              | 5.437637                | -1.479540 | 0.669035  |
| 20               | 1                | 0              | 5.172544                | 0.205875  | 0.139443  |
| 21               | 1                | 0              | 4.168229                | -0.485125 | 1.421819  |
| 22               | 8                | 0              | 3.517592                | 1.775426  | 0.025270  |
| 23               | 7                | 0              | -3.949399               | -0.109241 | 0.031190  |
| 24               | 8                | 0              | -4.572837               | 0.923733  | -0.119756 |
| 25               | 8                | 0              | -4.470742               | -1.196008 | 0.192655  |

### Structure 33f (DMSO)

Energy (Hartrees): -722.067907071  
No imaginary frequencies

Standard orientation:

| Center<br>Number | Atomic<br>Number | Atomic<br>Type | Coordinates (Angstroms) |           |           |
|------------------|------------------|----------------|-------------------------|-----------|-----------|
|                  |                  |                | X                       | Y         | Z         |
| 1                | 6                | 0              | -1.870712               | 1.190134  | -0.184236 |
| 2                | 6                | 0              | -0.488459               | 1.247189  | -0.211487 |
| 3                | 6                | 0              | 0.297054                | 0.093360  | -0.023131 |
| 4                | 6                | 0              | -0.369172               | -1.128102 | 0.190402  |
| 5                | 6                | 0              | -1.751044               | -1.206203 | 0.197077  |
| 6                | 6                | 0              | -2.485707               | -0.040425 | 0.016536  |
| 7                | 1                | 0              | -2.465222               | 2.080939  | -0.338223 |
| 8                | 1                | 0              | -0.012525               | 2.198954  | -0.415418 |
| 9                | 1                | 0              | 0.204105                | -2.028000 | 0.380137  |
| 10               | 1                | 0              | -2.253053               | -2.150464 | 0.362539  |
| 11               | 6                | 0              | 1.765071                | 0.159675  | -0.057218 |
| 12               | 6                | 0              | 2.456200                | -0.927453 | -0.577986 |
| 13               | 1                | 0              | 1.895365                | -1.659033 | -1.155813 |
| 14               | 6                | 0              | 2.398752                | 1.410269  | 0.320351  |
| 15               | 1                | 0              | 1.769897                | 2.079704  | 0.934825  |
| 16               | 1                | 0              | 4.048297                | -2.048507 | -0.969214 |
| 17               | 7                | 0              | 3.738617                | -1.237350 | -0.450715 |
| 18               | 6                | 0              | 4.675265                | -0.702835 | 0.521373  |
| 19               | 1                | 0              | 5.419076                | -1.472654 | 0.721919  |
| 20               | 1                | 0              | 5.161585                | 0.204071  | 0.162787  |
| 21               | 1                | 0              | 4.139861                | -0.465095 | 1.443580  |
| 22               | 8                | 0              | 3.513481                | 1.786224  | -0.014041 |
| 23               | 7                | 0              | -3.945742               | -0.109202 | 0.037414  |
| 24               | 8                | 0              | -4.572469               | 0.924602  | -0.107500 |
| 25               | 8                | 0              | -4.468637               | -1.196789 | 0.198529  |

### Structure 33f (C<sub>2</sub>H<sub>5</sub>OH)

Energy (Hartrees): -722.069517806  
No imaginary frequencies

Standard orientation:

| Center<br>Number | Atomic<br>Number | Atomic<br>Type | Coordinates (Angstroms) |           |           |
|------------------|------------------|----------------|-------------------------|-----------|-----------|
|                  |                  |                | X                       | Y         | Z         |
| 1                | 6                | 0              | -1.876628               | 1.192962  | -0.195417 |
| 2                | 6                | 0              | -0.495377               | 1.256133  | -0.228415 |
| 3                | 6                | 0              | 0.295231                | 0.106862  | -0.034398 |
| 4                | 6                | 0              | -0.362897               | -1.117730 | 0.185084  |
| 5                | 6                | 0              | -1.743821               | -1.203202 | 0.196879  |
| 6                | 6                | 0              | -2.483665               | -0.040596 | 0.014560  |
| 7                | 1                | 0              | -2.475386               | 2.080118  | -0.354595 |
| 8                | 1                | 0              | -0.024395               | 2.208236  | -0.441490 |
| 9                | 1                | 0              | 0.216139                | -2.013386 | 0.377996  |
| 10               | 1                | 0              | -2.240439               | -2.149011 | 0.369962  |
| 11               | 6                | 0              | 1.763229                | 0.176346  | -0.067481 |
| 12               | 6                | 0              | 2.455960                | -0.910934 | -0.597041 |
| 13               | 1                | 0              | 1.899816                | -1.623739 | -1.202323 |
| 14               | 6                | 0              | 2.397561                | 1.416288  | 0.309479  |
| 15               | 1                | 0              | 1.764691                | 2.108447  | 0.890579  |
| 16               | 1                | 0              | 4.043770                | -2.035564 | -0.983400 |
| 17               | 7                | 0              | 3.729990                | -1.234051 | -0.451425 |
| 18               | 6                | 0              | 4.656213                | -0.728964 | 0.547952  |
| 19               | 1                | 0              | 5.354473                | -1.530820 | 0.784420  |
| 20               | 1                | 0              | 5.202838                | 0.144601  | 0.193568  |
| 21               | 1                | 0              | 4.101537                | -0.454022 | 1.447056  |
| 22               | 8                | 0              | 3.535452                | 1.770640  | 0.005248  |
| 23               | 7                | 0              | -3.938827               | -0.115972 | 0.045448  |
| 24               | 8                | 0              | -4.576072               | 0.916169  | -0.068428 |
| 25               | 8                | 0              | -4.461383               | -1.207769 | 0.184785  |

### Structure 33g (vacuum)

Energy (Hartrees): -722.047847678  
No imaginary frequencies

Standard orientation:

| Center<br>Number | Atomic<br>Number | Atomic<br>Type | Coordinates (Angstroms) |           |           |
|------------------|------------------|----------------|-------------------------|-----------|-----------|
|                  |                  |                | X                       | Y         | Z         |
| 1                | 6                | 0              | 1.716025                | -1.108396 | -0.475418 |
| 2                | 6                | 0              | 0.341011                | -0.938845 | -0.505596 |
| 3                | 6                | 0              | -0.255345               | 0.244769  | -0.047555 |
| 4                | 6                | 0              | 0.573947                | 1.259768  | 0.450421  |
| 5                | 6                | 0              | 1.951884                | 1.113817  | 0.471257  |
| 6                | 6                | 0              | 2.500724                | -0.073742 | 0.010839  |
| 7                | 1                | 0              | 2.185485                | -2.014475 | -0.834027 |
| 8                | 1                | 0              | -0.277171               | -1.726696 | -0.919651 |
| 9                | 1                | 0              | 0.131347                | 2.163649  | 0.851686  |
| 10               | 1                | 0              | 2.600798                | 1.889705  | 0.854457  |
| 11               | 6                | 0              | -1.719379               | 0.411652  | -0.093781 |
| 12               | 6                | 0              | -2.275293               | 1.607937  | -0.437976 |
| 13               | 1                | 0              | -1.658642               | 2.463635  | -0.700130 |
| 14               | 6                | 0              | -2.592599               | -0.712042 | 0.215168  |
| 15               | 1                | 0              | -2.118270               | -1.650257 | 0.529488  |
| 16               | 7                | 0              | -3.866014               | -0.615033 | 0.157500  |
| 17               | 6                | 0              | -4.678352               | -1.761356 | 0.511149  |
| 18               | 1                | 0              | -5.333884               | -1.497412 | 1.343592  |
| 19               | 1                | 0              | -5.313452               | -2.029160 | -0.335756 |
| 20               | 1                | 0              | -4.072800               | -2.629811 | 0.794334  |
| 21               | 8                | 0              | -3.565713               | 1.839251  | -0.515321 |
| 22               | 1                | 0              | -4.029948               | 0.977561  | -0.279843 |
| 23               | 7                | 0              | 3.964411                | -0.242762 | 0.041084  |
| 24               | 8                | 0              | 4.628054                | 0.681735  | 0.459467  |
| 25               | 8                | 0              | 4.415412                | -1.296430 | -0.354808 |

### Structure 33g (CHCl<sub>3</sub>)

Energy (Hartrees): -722.065187833  
No imaginary frequencies

Standard orientation:

| Center<br>Number | Atomic<br>Number | Atomic<br>Type | Coordinates (Angstroms) |           |           |
|------------------|------------------|----------------|-------------------------|-----------|-----------|
|                  |                  |                | X                       | Y         | Z         |
| 1                | 6                | 0              | 1.712566                | -1.126964 | -0.431194 |
| 2                | 6                | 0              | 0.338229                | -0.957118 | -0.455932 |
| 3                | 6                | 0              | -0.253445               | 0.244731  | -0.036938 |
| 4                | 6                | 0              | 0.582054                | 1.276839  | 0.418594  |
| 5                | 6                | 0              | 1.959025                | 1.129800  | 0.434343  |
| 6                | 6                | 0              | 2.503692                | -0.075527 | 0.010950  |
| 7                | 1                | 0              | 2.168199                | -2.050010 | -0.764106 |
| 8                | 1                | 0              | -0.281368               | -1.762020 | -0.832718 |
| 9                | 1                | 0              | 0.147532                | 2.197885  | 0.788848  |
| 10               | 1                | 0              | 2.602902                | 1.924181  | 0.787729  |
| 11               | 6                | 0              | -1.716745               | 0.412011  | -0.081492 |
| 12               | 6                | 0              | -2.271303               | 1.616327  | -0.400661 |
| 13               | 1                | 0              | -1.660542               | 2.481971  | -0.643564 |
| 14               | 6                | 0              | -2.593732               | -0.718779 | 0.200627  |
| 15               | 1                | 0              | -2.130978               | -1.667087 | 0.495435  |
| 16               | 7                | 0              | -3.866669               | -0.607890 | 0.138322  |
| 17               | 6                | 0              | -4.695287               | -1.753068 | 0.461123  |
| 18               | 1                | 0              | -5.360559               | -1.495673 | 1.288479  |
| 19               | 1                | 0              | -5.321294               | -1.999954 | -0.399433 |
| 20               | 1                | 0              | -4.101038               | -2.630465 | 0.737812  |
| 21               | 8                | 0              | -3.566894               | 1.836944  | -0.474893 |
| 22               | 1                | 0              | -4.020977               | 0.955178  | -0.254992 |
| 23               | 7                | 0              | 3.960258                | -0.244589 | 0.033645  |
| 24               | 8                | 0              | 4.640587                | 0.701051  | 0.379747  |
| 25               | 8                | 0              | 4.415392                | -1.322515 | -0.295325 |

### Structure 33g (DMSO)

Energy (Hartrees): -722.064529281

No imaginary frequencies

Standard orientation:

| Center<br>Number | Atomic<br>Number | Atomic<br>Type | Coordinates (Angstroms) |           |           |
|------------------|------------------|----------------|-------------------------|-----------|-----------|
|                  |                  |                | X                       | Y         | Z         |
| 1                | 6                | 0              | 1.712262                | -1.133844 | -0.415361 |
| 2                | 6                | 0              | 0.337777                | -0.965335 | -0.438272 |
| 3                | 6                | 0              | -0.252876               | 0.242854  | -0.035019 |
| 4                | 6                | 0              | 0.583637                | 1.282199  | 0.403639  |
| 5                | 6                | 0              | 1.960301                | 1.134858  | 0.419131  |
| 6                | 6                | 0              | 2.504890                | -0.076410 | 0.010981  |
| 7                | 1                | 0              | 2.163257                | -2.063282 | -0.736769 |
| 8                | 1                | 0              | -0.280622               | -1.778501 | -0.798982 |
| 9                | 1                | 0              | 0.152421                | 2.210504  | 0.759388  |
| 10               | 1                | 0              | 2.601638                | 1.936506  | 0.760732  |
| 11               | 6                | 0              | -1.715677               | 0.410387  | -0.078204 |
| 12               | 6                | 0              | -2.269865               | 1.616524  | -0.394690 |
| 13               | 1                | 0              | -1.658868               | 2.483075  | -0.634038 |
| 14               | 6                | 0              | -2.594636               | -0.720197 | 0.198980  |
| 15               | 1                | 0              | -2.137543               | -1.672649 | 0.486663  |
| 16               | 7                | 0              | -3.867783               | -0.601847 | 0.137145  |
| 17               | 6                | 0              | -4.701927               | -1.746453 | 0.451489  |
| 18               | 1                | 0              | -5.370839               | -1.490374 | 1.276420  |
| 19               | 1                | 0              | -5.324114               | -1.988586 | -0.413360 |
| 20               | 1                | 0              | -4.109701               | -2.625029 | 0.727173  |
| 21               | 8                | 0              | -3.566067               | 1.832603  | -0.469349 |
| 22               | 1                | 0              | -4.012878               | 0.942296  | -0.249526 |
| 23               | 7                | 0              | 3.959980                | -0.244234 | 0.032608  |
| 24               | 8                | 0              | 4.641250                | 0.699585  | 0.386302  |
| 25               | 8                | 0              | 4.418386                | -1.319551 | -0.304703 |

### Structure 33g (C<sub>2</sub>H<sub>5</sub>OH)

Energy (Hartrees): -722.064407374

No imaginary frequencies

Standard orientation:

| Center<br>Number | Atomic<br>Number | Atomic<br>Type | Coordinates (Angstroms) |           |           |
|------------------|------------------|----------------|-------------------------|-----------|-----------|
|                  |                  |                | X                       | Y         | Z         |
| 1                | 6                | 0              | 1.710013                | -1.127275 | -0.434226 |
| 2                | 6                | 0              | 0.336376                | -0.955591 | -0.458665 |
| 3                | 6                | 0              | -0.252734               | 0.247769  | -0.038531 |
| 4                | 6                | 0              | 0.583499                | 1.280702  | 0.415426  |
| 5                | 6                | 0              | 1.959576                | 1.132194  | 0.430608  |
| 6                | 6                | 0              | 2.502039                | -0.075616 | 0.008529  |
| 7                | 1                | 0              | 2.160278                | -2.052401 | -0.769271 |
| 8                | 1                | 0              | -0.283126               | -1.761361 | -0.833908 |
| 9                | 1                | 0              | 0.152295                | 2.203506  | 0.785146  |
| 10               | 1                | 0              | 2.600661                | 1.927751  | 0.786644  |
| 11               | 6                | 0              | -1.715698               | 0.415389  | -0.078474 |
| 12               | 6                | 0              | -2.267788               | 1.622804  | -0.383963 |
| 13               | 1                | 0              | -1.661019               | 2.493381  | -0.617813 |
| 14               | 6                | 0              | -2.591654               | -0.720228 | 0.194040  |
| 15               | 1                | 0              | -2.128429               | -1.670262 | 0.479993  |
| 16               | 7                | 0              | -3.864756               | -0.608696 | 0.132470  |
| 17               | 6                | 0              | -4.688760               | -1.761378 | 0.446125  |
| 18               | 1                | 0              | -5.358132               | -1.512736 | 1.272933  |
| 19               | 1                | 0              | -5.311293               | -2.006147 | -0.417662 |
| 20               | 1                | 0              | -4.090006               | -2.636350 | 0.718809  |
| 21               | 8                | 0              | -3.569304               | 1.840005  | -0.454304 |
| 22               | 1                | 0              | -4.021530               | 0.951840  | -0.242875 |
| 23               | 7                | 0              | 3.952371                | -0.246273 | 0.034053  |
| 24               | 8                | 0              | 4.643211                | 0.712168  | 0.327482  |
| 25               | 8                | 0              | 4.410816                | -1.340305 | -0.239787 |

### Structure 33h (vacuum)

Energy (Hartrees): -722.023945368  
No imaginary frequencies

Standard orientation:

| Center<br>Number | Atomic<br>Number | Atomic<br>Type | Coordinates (Angstroms) |           |           |
|------------------|------------------|----------------|-------------------------|-----------|-----------|
|                  |                  |                | X                       | Y         | Z         |
| 1                | 6                | 0              | 1.639411                | -1.108185 | -0.431558 |
| 2                | 6                | 0              | 0.267409                | -0.911299 | -0.429017 |
| 3                | 6                | 0              | -0.291260               | 0.299591  | 0.003752  |
| 4                | 6                | 0              | 0.570315                | 1.307914  | 0.457765  |
| 5                | 6                | 0              | 1.945237                | 1.133623  | 0.448543  |
| 6                | 6                | 0              | 2.457069                | -0.075919 | 0.002992  |
| 7                | 1                | 0              | 2.080417                | -2.034752 | -0.773584 |
| 8                | 1                | 0              | -0.382815               | -1.698645 | -0.792295 |
| 9                | 1                | 0              | 0.156824                | 2.228908  | 0.851159  |
| 10               | 1                | 0              | 2.619540                | 1.903937  | 0.797656  |
| 11               | 6                | 0              | -1.759045               | 0.479375  | -0.023597 |
| 12               | 6                | 0              | -2.262643               | 1.676476  | -0.371868 |
| 13               | 1                | 0              | -1.591966               | 2.482508  | -0.659515 |
| 14               | 6                | 0              | -2.592241               | -0.684611 | 0.338638  |
| 15               | 1                | 0              | -2.103458               | -1.412340 | 1.005732  |
| 16               | 7                | 0              | -3.776587               | -0.858530 | -0.068802 |
| 17               | 6                | 0              | -4.475378               | -2.035031 | 0.403572  |
| 18               | 1                | 0              | -4.806876               | -2.619408 | -0.457803 |
| 19               | 1                | 0              | -3.866878               | -2.670954 | 1.060777  |
| 20               | 1                | 0              | -5.373132               | -1.721085 | 0.941225  |
| 21               | 8                | 0              | -3.574314               | 1.958429  | -0.391648 |
| 22               | 1                | 0              | -3.710886               | 2.863800  | -0.678845 |
| 23               | 7                | 0              | 3.918139                | -0.272905 | -0.001467 |
| 24               | 8                | 0              | 4.610670                | 0.653290  | 0.363185  |
| 25               | 8                | 0              | 4.338035                | -1.348410 | -0.371282 |

### Structure 33h (CHCl<sub>3</sub>)

Energy (Hartrees): -722.047099743  
No imaginary frequencies

Standard orientation:

| Center<br>Number | Atomic<br>Number | Atomic<br>Type | Coordinates (Angstroms) |           |           |
|------------------|------------------|----------------|-------------------------|-----------|-----------|
|                  |                  |                | X                       | Y         | Z         |
| 1                | 6                | 0              | 1.633980                | -1.117636 | -0.404508 |
| 2                | 6                | 0              | 0.263052                | -0.917502 | -0.401708 |
| 3                | 6                | 0              | -0.292774               | 0.305323  | 0.004406  |
| 4                | 6                | 0              | 0.573522                | 1.324106  | 0.430412  |
| 5                | 6                | 0              | 1.947065                | 1.146573  | 0.420546  |
| 6                | 6                | 0              | 2.456083                | -0.075935 | 0.001997  |
| 7                | 1                | 0              | 2.061964                | -2.056895 | -0.728756 |
| 8                | 1                | 0              | -0.384998               | -1.715827 | -0.744385 |
| 9                | 1                | 0              | 0.167906                | 2.258689  | 0.799492  |
| 10               | 1                | 0              | 2.615498                | 1.930393  | 0.751112  |
| 11               | 6                | 0              | -1.760582               | 0.484380  | -0.021934 |
| 12               | 6                | 0              | -2.266286               | 1.691588  | -0.342463 |
| 13               | 1                | 0              | -1.604689               | 2.512658  | -0.605466 |
| 14               | 6                | 0              | -2.590122               | -0.686632 | 0.322435  |
| 15               | 1                | 0              | -2.104663               | -1.420047 | 0.982980  |
| 16               | 7                | 0              | -3.775136               | -0.866675 | -0.088309 |
| 17               | 6                | 0              | -4.462295               | -2.055304 | 0.378452  |
| 18               | 1                | 0              | -4.792127               | -2.638115 | -0.485336 |
| 19               | 1                | 0              | -3.843434               | -2.688695 | 1.026825  |
| 20               | 1                | 0              | -5.361121               | -1.756623 | 0.924252  |
| 21               | 8                | 0              | -3.576566               | 1.967325  | -0.363749 |
| 22               | 1                | 0              | -3.707726               | 2.890992  | -0.607521 |
| 23               | 7                | 0              | 3.909793                | -0.275630 | -0.002969 |
| 24               | 8                | 0              | 4.616515                | 0.660652  | 0.314186  |
| 25               | 8                | 0              | 4.335168                | -1.367248 | -0.325446 |

### Structure 33h (DMSO)

Energy (Hartrees): -722.046289459  
No imaginary frequencies

Standard orientation:

| Center<br>Number | Atomic<br>Number | Atomic<br>Type | Coordinates (Angstroms) |           |           |
|------------------|------------------|----------------|-------------------------|-----------|-----------|
|                  |                  |                | X                       | Y         | Z         |
| 1                | 6                | 0              | 1.625134                | -1.124499 | -0.378558 |
| 2                | 6                | 0              | 0.254582                | -0.920901 | -0.375465 |
| 3                | 6                | 0              | -0.296525               | 0.313002  | 0.003267  |
| 4                | 6                | 0              | 0.573633                | 1.339830  | 0.402522  |
| 5                | 6                | 0              | 1.946367                | 1.157838  | 0.392759  |
| 6                | 6                | 0              | 2.451343                | -0.075756 | 0.001200  |
| 7                | 1                | 0              | 2.045563                | -2.074052 | -0.681843 |
| 8                | 1                | 0              | -0.394583               | -1.728545 | -0.693752 |
| 9                | 1                | 0              | 0.174938                | 2.286080  | 0.748349  |
| 10               | 1                | 0              | 2.614321                | 1.950557  | 0.702469  |
| 11               | 6                | 0              | -1.764586               | 0.493755  | -0.020137 |
| 12               | 6                | 0              | -2.269333               | 1.704711  | -0.329375 |
| 13               | 1                | 0              | -1.608717               | 2.527351  | -0.588993 |
| 14               | 6                | 0              | -2.589004               | -0.680483 | 0.327687  |
| 15               | 1                | 0              | -2.113207               | -1.391246 | 1.018147  |
| 16               | 7                | 0              | -3.757339               | -0.892797 | -0.116716 |
| 17               | 6                | 0              | -4.436446               | -2.084117 | 0.360704  |
| 18               | 1                | 0              | -4.738724               | -2.690306 | -0.497219 |
| 19               | 1                | 0              | -3.820494               | -2.693063 | 1.033882  |
| 20               | 1                | 0              | -5.351029               | -1.789047 | 0.882459  |
| 21               | 8                | 0              | -3.579645               | 1.985455  | -0.339167 |
| 22               | 1                | 0              | -3.702567               | 2.917573  | -0.557173 |
| 23               | 7                | 0              | 3.903508                | -0.279103 | -0.004248 |
| 24               | 8                | 0              | 4.614522                | 0.656254  | 0.309999  |
| 25               | 8                | 0              | 4.327665                | -1.373246 | -0.324232 |

### Structure 33h (C<sub>2</sub>H<sub>5</sub>OH)

Energy (Hartrees): -722.051634712  
No imaginary frequencies

Standard orientation:

| Center<br>Number | Atomic<br>Number | Atomic<br>Type | Coordinates (Angstroms) |           |           |
|------------------|------------------|----------------|-------------------------|-----------|-----------|
|                  |                  |                | X                       | Y         | Z         |
| 1                | 6                | 0              | 1.632323                | -1.119507 | -0.404721 |
| 2                | 6                | 0              | 0.261972                | -0.918957 | -0.402529 |
| 3                | 6                | 0              | -0.293511               | 0.304543  | 0.003920  |
| 4                | 6                | 0              | 0.572344                | 1.324533  | 0.429972  |
| 5                | 6                | 0              | 1.945232                | 1.146868  | 0.421207  |
| 6                | 6                | 0              | 2.453919                | -0.076962 | 0.003219  |
| 7                | 1                | 0              | 2.055847                | -2.060106 | -0.731230 |
| 8                | 1                | 0              | -0.384074               | -1.718905 | -0.745527 |
| 9                | 1                | 0              | 0.168952                | 2.261031  | 0.796447  |
| 10               | 1                | 0              | 2.609857                | 1.933320  | 0.753605  |
| 11               | 6                | 0              | -1.761050               | 0.485112  | -0.023363 |
| 12               | 6                | 0              | -2.260264               | 1.699258  | -0.333598 |
| 13               | 1                | 0              | -1.600257               | 2.525313  | -0.582510 |
| 14               | 6                | 0              | -2.589043               | -0.689268 | 0.309440  |
| 15               | 1                | 0              | -2.093417               | -1.438205 | 0.942617  |
| 16               | 7                | 0              | -3.784632               | -0.862205 | -0.079687 |
| 17               | 6                | 0              | -4.455021               | -2.067420 | 0.375359  |
| 18               | 1                | 0              | -4.789608               | -2.638971 | -0.494184 |
| 19               | 1                | 0              | -3.820692               | -2.704655 | 1.003277  |
| 20               | 1                | 0              | -5.349781               | -1.789793 | 0.938648  |
| 21               | 8                | 0              | -3.570109               | 1.978461  | -0.362889 |
| 22               | 1                | 0              | -3.700072               | 2.908146  | -0.588239 |
| 23               | 7                | 0              | 3.902078                | -0.275711 | -0.002269 |
| 24               | 8                | 0              | 4.616258                | 0.662679  | 0.298845  |
| 25               | 8                | 0              | 4.333815                | -1.371260 | -0.310037 |

### Structure 33i (vacuum)

Energy (Hartrees): -722.030749054  
No imaginary frequencies

Standard orientation:

| Center<br>Number | Atomic<br>Number | Atomic<br>Type | Coordinates (Angstroms) |           |           |
|------------------|------------------|----------------|-------------------------|-----------|-----------|
|                  |                  |                | X                       | Y         | Z         |
| 1                | 6                | 0              | 1.506187                | -1.181992 | -0.467329 |
| 2                | 6                | 0              | 0.138334                | -0.956718 | -0.467264 |
| 3                | 6                | 0              | -0.399510               | 0.246583  | 0.010176  |
| 4                | 6                | 0              | 0.475653                | 1.228551  | 0.494470  |
| 5                | 6                | 0              | 1.845414                | 1.019188  | 0.500125  |
| 6                | 6                | 0              | 2.337556                | -0.185279 | 0.018986  |
| 7                | 1                | 0              | 1.932016                | -2.103092 | -0.841464 |
| 8                | 1                | 0              | -0.522225               | -1.718639 | -0.864473 |
| 9                | 1                | 0              | 0.077025                | 2.159672  | 0.873296  |
| 10               | 1                | 0              | 2.532367                | 1.765693  | 0.875117  |
| 11               | 6                | 0              | -1.863350               | 0.441670  | 0.000881  |
| 12               | 6                | 0              | -2.464090               | 1.616565  | -0.243947 |
| 13               | 1                | 0              | -3.548376               | 1.669151  | -0.242072 |
| 14               | 6                | 0              | -2.730907               | -0.727837 | 0.267948  |
| 15               | 1                | 0              | -2.242288               | -1.569614 | 0.780131  |
| 16               | 7                | 0              | -3.957471               | -0.766880 | -0.039794 |
| 17               | 6                | 0              | -4.710989               | -1.944476 | 0.338142  |
| 18               | 1                | 0              | -5.166880               | -2.378173 | -0.554658 |
| 19               | 1                | 0              | -4.101120               | -2.707752 | 0.838915  |
| 20               | 1                | 0              | -5.526218               | -1.649614 | 1.003165  |
| 21               | 8                | 0              | -1.786647               | 2.749634  | -0.521608 |
| 22               | 1                | 0              | -2.400097               | 3.463563  | -0.709293 |
| 23               | 7                | 0              | 3.794685                | -0.413239 | 0.023806  |
| 24               | 8                | 0              | 4.502521                | 0.484687  | 0.427273  |
| 25               | 8                | 0              | 4.196565                | -1.485307 | -0.375649 |

### Structure 33i (CHCl<sub>3</sub>)

Energy (Hartrees): -722.051620983  
No imaginary frequencies

Standard orientation:

| Center<br>Number | Atomic<br>Number | Atomic<br>Type | Coordinates (Angstroms) |           |           |
|------------------|------------------|----------------|-------------------------|-----------|-----------|
|                  |                  |                | X                       | Y         | Z         |
| 1                | 6                | 0              | 1.494302                | -1.185141 | -0.457837 |
| 2                | 6                | 0              | 0.127908                | -0.954436 | -0.454369 |
| 3                | 6                | 0              | -0.403843               | 0.255161  | 0.017703  |
| 4                | 6                | 0              | 0.478506                | 1.236839  | 0.493925  |
| 5                | 6                | 0              | 1.847082                | 1.023581  | 0.494638  |
| 6                | 6                | 0              | 2.332638                | -0.186691 | 0.017148  |
| 7                | 1                | 0              | 1.906045                | -2.113941 | -0.829700 |
| 8                | 1                | 0              | -0.534981               | -1.718802 | -0.843006 |
| 9                | 1                | 0              | 0.088877                | 2.170181  | 0.877434  |
| 10               | 1                | 0              | 2.530438                | 1.775021  | 0.867026  |
| 11               | 6                | 0              | -1.867056               | 0.454346  | 0.014063  |
| 12               | 6                | 0              | -2.462076               | 1.636573  | -0.226887 |
| 13               | 1                | 0              | -3.544760               | 1.712685  | -0.210260 |
| 14               | 6                | 0              | -2.729902               | -0.716430 | 0.283307  |
| 15               | 1                | 0              | -2.252907               | -1.535306 | 0.838781  |
| 16               | 7                | 0              | -3.943700               | -0.787898 | -0.073995 |
| 17               | 6                | 0              | -4.691063               | -1.966843 | 0.319841  |
| 18               | 1                | 0              | -5.114544               | -2.436329 | -0.571483 |
| 19               | 1                | 0              | -4.084429               | -2.703466 | 0.861548  |
| 20               | 1                | 0              | -5.530768               | -1.665987 | 0.951986  |
| 21               | 8                | 0              | -1.780178               | 2.756535  | -0.518993 |
| 22               | 1                | 0              | -2.392478               | 3.483254  | -0.683491 |
| 23               | 7                | 0              | 3.782345                | -0.418936 | 0.017227  |
| 24               | 8                | 0              | 4.506446                | 0.488356  | 0.376049  |
| 25               | 8                | 0              | 4.186232                | -1.507544 | -0.340888 |



### Structure 33i (DMSO)

Energy (Hartrees): -722.049691430  
No imaginary frequencies

Standard orientation:

| Center<br>Number | Atomic<br>Number | Atomic<br>Type | Coordinates (Angstroms) |           |           |
|------------------|------------------|----------------|-------------------------|-----------|-----------|
|                  |                  |                | X                       | Y         | Z         |
| 1                | 6                | 0              | 1.490395                | -1.190232 | -0.443467 |
| 2                | 6                | 0              | 0.124033                | -0.958749 | -0.438136 |
| 3                | 6                | 0              | -0.404467               | 0.258102  | 0.019069  |
| 4                | 6                | 0              | 0.480104                | 1.244212  | 0.482482  |
| 5                | 6                | 0              | 1.848521                | 1.029954  | 0.481431  |
| 6                | 6                | 0              | 2.331424                | -0.186613 | 0.016371  |
| 7                | 1                | 0              | 1.896122                | -2.125429 | -0.805812 |
| 8                | 1                | 0              | -0.539742               | -1.730280 | -0.811208 |
| 9                | 1                | 0              | 0.094617                | 2.181564  | 0.860261  |
| 10               | 1                | 0              | 2.530243                | 1.786924  | 0.845690  |
| 11               | 6                | 0              | -1.867281               | 0.458444  | 0.018875  |
| 12               | 6                | 0              | -2.465036               | 1.641733  | -0.212772 |
| 13               | 1                | 0              | -3.547169               | 1.722138  | -0.177153 |
| 14               | 6                | 0              | -2.727897               | -0.712720 | 0.293486  |
| 15               | 1                | 0              | -2.262050               | -1.514649 | 0.881306  |
| 16               | 7                | 0              | -3.930565               | -0.801753 | -0.098301 |
| 17               | 6                | 0              | -4.682818               | -1.975207 | 0.307320  |
| 18               | 1                | 0              | -5.069296               | -2.477908 | -0.582961 |
| 19               | 1                | 0              | -4.088742               | -2.685838 | 0.894802  |
| 20               | 1                | 0              | -5.547201               | -1.661195 | 0.898780  |
| 21               | 8                | 0              | -1.787407               | 2.761077  | -0.516587 |
| 22               | 1                | 0              | -2.405189               | 3.492574  | -0.639634 |
| 23               | 7                | 0              | 3.780187                | -0.419922 | 0.013941  |
| 24               | 8                | 0              | 4.507908                | 0.492544  | 0.355380  |
| 25               | 8                | 0              | 4.183149                | -1.514835 | -0.328980 |

### Structure 33i (C<sub>2</sub>H<sub>5</sub>OH)

Energy (Hartrees): -722.053924984  
No imaginary frequencies

Standard orientation:

| Center<br>Number | Atomic<br>Number | Atomic<br>Type | Coordinates (Angstroms) |           |           |
|------------------|------------------|----------------|-------------------------|-----------|-----------|
|                  |                  |                | X                       | Y         | Z         |
| 1                | 6                | 0              | 1.485162                | -1.183702 | -0.457635 |
| 2                | 6                | 0              | 0.120065                | -0.948561 | -0.452705 |
| 3                | 6                | 0              | -0.406787               | 0.264457  | 0.017811  |
| 4                | 6                | 0              | 0.478966                | 1.243913  | 0.494180  |
| 5                | 6                | 0              | 1.846584                | 1.027236  | 0.493112  |
| 6                | 6                | 0              | 2.326777                | -0.185997 | 0.015486  |
| 7                | 1                | 0              | 1.889587                | -2.115348 | -0.830712 |
| 8                | 1                | 0              | -0.545501               | -1.712986 | -0.837308 |
| 9                | 1                | 0              | 0.094074                | 2.175899  | 0.885986  |
| 10               | 1                | 0              | 2.529392                | 1.777526  | 0.869382  |
| 11               | 6                | 0              | -1.869254               | 0.464779  | 0.018884  |
| 12               | 6                | 0              | -2.464776               | 1.649854  | -0.213648 |
| 13               | 1                | 0              | -3.545883               | 1.737822  | -0.179158 |
| 14               | 6                | 0              | -2.725335               | -0.707590 | 0.295494  |
| 15               | 1                | 0              | -2.258166               | -1.499973 | 0.895128  |
| 16               | 7                | 0              | -3.924708               | -0.812529 | -0.104252 |
| 17               | 6                | 0              | -4.662847               | -1.991756 | 0.313714  |
| 18               | 1                | 0              | -5.035362               | -2.514410 | -0.570835 |
| 19               | 1                | 0              | -4.062972               | -2.684464 | 0.916005  |
| 20               | 1                | 0              | -5.536358               | -1.683382 | 0.894240  |
| 21               | 8                | 0              | -1.784268               | 2.766318  | -0.517866 |
| 22               | 1                | 0              | -2.394261               | 3.503861  | -0.643367 |
| 23               | 7                | 0              | 3.770407                | -0.422683 | 0.014504  |
| 24               | 8                | 0              | 4.506218                | 0.488878  | 0.343405  |
| 25               | 8                | 0              | 4.174828                | -1.521929 | -0.315448 |

### Structure 33j (vacuum)

Energy (Hartrees): -722.031586510  
No imaginary frequencies

Standard orientation:

| Center<br>Number | Atomic<br>Number | Atomic<br>Type | Coordinates (Angstroms) |           |           |
|------------------|------------------|----------------|-------------------------|-----------|-----------|
|                  |                  |                | X                       | Y         | Z         |
| 1                | 6                | 0              | 1.319057                | -0.995677 | -0.703592 |
| 2                | 6                | 0              | -0.044018               | -0.743851 | -0.722598 |
| 3                | 6                | 0              | -0.574605               | 0.363754  | -0.052267 |
| 4                | 6                | 0              | 0.287479                | 1.210239  | 0.652579  |
| 5                | 6                | 0              | 1.652110                | 0.967173  | 0.687700  |
| 6                | 6                | 0              | 2.143143                | -0.133373 | 0.003381  |
| 7                | 1                | 0              | 1.747599                | -1.843632 | -1.220029 |
| 8                | 1                | 0              | -0.705925               | -1.412886 | -1.253847 |
| 9                | 1                | 0              | -0.115836               | 2.065344  | 1.178881  |
| 10               | 1                | 0              | 2.330827                | 1.608528  | 1.232924  |
| 11               | 6                | 0              | -2.029036               | 0.641959  | -0.091965 |
| 12               | 6                | 0              | -2.525240               | 1.874927  | -0.284890 |
| 13               | 1                | 0              | -3.599586               | 2.037304  | -0.310606 |
| 14               | 6                | 0              | -3.020435               | -0.430325 | 0.082792  |
| 15               | 1                | 0              | -4.071347               | -0.103016 | 0.032652  |
| 16               | 7                | 0              | -2.719369               | -1.640631 | 0.289732  |
| 17               | 6                | 0              | -3.803664               | -2.583991 | 0.464931  |
| 18               | 1                | 0              | -3.714175               | -3.375650 | -0.282559 |
| 19               | 1                | 0              | -3.707352               | -3.056836 | 1.444941  |
| 20               | 1                | 0              | -4.798217               | -2.124884 | 0.383577  |
| 21               | 8                | 0              | -1.749209               | 2.964967  | -0.463192 |
| 22               | 1                | 0              | -2.290187               | 3.734353  | -0.653661 |
| 23               | 7                | 0              | 3.594634                | -0.398917 | 0.032015  |
| 24               | 8                | 0              | 4.293191                | 0.363491  | 0.665596  |
| 25               | 8                | 0              | 4.002091                | -1.363056 | -0.580021 |

### Structure 33j (CHCl<sub>3</sub>)

Energy (Hartrees): -722.054000505  
No imaginary frequencies

Standard orientation:

| Center<br>Number | Atomic<br>Number | Atomic<br>Type | Coordinates (Angstroms) |           |           |
|------------------|------------------|----------------|-------------------------|-----------|-----------|
|                  |                  |                | X                       | Y         | Z         |
| 1                | 6                | 0              | 1.326554                | -0.965748 | -0.750150 |
| 2                | 6                | 0              | -0.036072               | -0.713801 | -0.770522 |
| 3                | 6                | 0              | -0.577112               | 0.360432  | -0.053541 |
| 4                | 6                | 0              | 0.277040                | 1.173347  | 0.700681  |
| 5                | 6                | 0              | 1.641766                | 0.931746  | 0.738265  |
| 6                | 6                | 0              | 2.142297                | -0.135076 | 0.006068  |
| 7                | 1                | 0              | 1.753497                | -1.788016 | -1.308471 |
| 8                | 1                | 0              | -0.687043               | -1.353276 | -1.351439 |
| 9                | 1                | 0              | -0.132307               | 1.998755  | 1.269181  |
| 10               | 1                | 0              | 2.305830                | 1.553128  | 1.323952  |
| 11               | 6                | 0              | -2.030721               | 0.639927  | -0.099419 |
| 12               | 6                | 0              | -2.518577               | 1.878385  | -0.297552 |
| 13               | 1                | 0              | -3.590740               | 2.053189  | -0.331229 |
| 14               | 6                | 0              | -3.022003               | -0.429164 | 0.071616  |
| 15               | 1                | 0              | -4.070262               | -0.108411 | -0.015804 |
| 16               | 7                | 0              | -2.722188               | -1.635498 | 0.318888  |
| 17               | 6                | 0              | -3.814312               | -2.575618 | 0.480186  |
| 18               | 1                | 0              | -3.715330               | -3.373420 | -0.260730 |
| 19               | 1                | 0              | -3.740993               | -3.043974 | 1.465031  |
| 20               | 1                | 0              | -4.804153               | -2.113065 | 0.375505  |
| 21               | 8                | 0              | -1.732290               | 2.952956  | -0.480203 |
| 22               | 1                | 0              | -2.271389               | 3.736092  | -0.640875 |
| 23               | 7                | 0              | 3.588442                | -0.396109 | 0.033518  |
| 24               | 8                | 0              | 4.286485                | 0.325632  | 0.717686  |
| 25               | 8                | 0              | 4.015300                | -1.319379 | -0.630703 |

### Structure 33j (DMSO)

Energy (Hartrees): -722.053332039  
No imaginary frequencies

Standard orientation:

| Center<br>Number | Atomic<br>Number | Atomic<br>Type | Coordinates (Angstroms) |           |           |
|------------------|------------------|----------------|-------------------------|-----------|-----------|
|                  |                  |                | X                       | Y         | Z         |
| 1                | 6                | 0              | 1.333142                | -0.934036 | -0.787863 |
| 2                | 6                | 0              | -0.029954               | -0.684245 | -0.809586 |
| 3                | 6                | 0              | -0.579008               | 0.364017  | -0.060240 |
| 4                | 6                | 0              | 0.267566                | 1.155467  | 0.724786  |
| 5                | 6                | 0              | 1.632782                | 0.915211  | 0.765114  |
| 6                | 6                | 0              | 2.140886                | -0.127612 | 0.003537  |
| 7                | 1                | 0              | 1.763174                | -1.736893 | -1.371703 |
| 8                | 1                | 0              | -0.674702               | -1.303961 | -1.419460 |
| 9                | 1                | 0              | -0.147425               | 1.961152  | 1.317378  |
| 10               | 1                | 0              | 2.288392                | 1.521427  | 1.376042  |
| 11               | 6                | 0              | -2.034124               | 0.635848  | -0.101560 |
| 12               | 6                | 0              | -2.530839               | 1.871751  | -0.296055 |
| 13               | 1                | 0              | -3.604177               | 2.040339  | -0.322680 |
| 14               | 6                | 0              | -3.016358               | -0.439744 | 0.072867  |
| 15               | 1                | 0              | -4.066272               | -0.130081 | -0.021199 |
| 16               | 7                | 0              | -2.704459               | -1.642379 | 0.330798  |
| 17               | 6                | 0              | -3.790301               | -2.592378 | 0.490425  |
| 18               | 1                | 0              | -3.681998               | -3.391503 | -0.248141 |
| 19               | 1                | 0              | -3.718462               | -3.057364 | 1.477260  |
| 20               | 1                | 0              | -4.782284               | -2.137262 | 0.379399  |
| 21               | 8                | 0              | -1.750342               | 2.948075  | -0.487928 |
| 22               | 1                | 0              | -2.299502               | 3.729234  | -0.627901 |
| 23               | 7                | 0              | 3.586216                | -0.389038 | 0.036705  |
| 24               | 8                | 0              | 4.272546                | 0.282595  | 0.782281  |
| 25               | 8                | 0              | 4.026322                | -1.263275 | -0.684361 |

### Structure 33j (C<sub>2</sub>H<sub>5</sub>OH)

Energy (Hartrees): -722.057174225  
No imaginary frequencies

Standard orientation:

| Center<br>Number | Atomic<br>Number | Atomic<br>Type | Coordinates (Angstroms) |           |           |
|------------------|------------------|----------------|-------------------------|-----------|-----------|
|                  |                  |                | X                       | Y         | Z         |
| 1                | 6                | 0              | 1.333900                | -0.940378 | -0.786563 |
| 2                | 6                | 0              | -0.027947               | -0.686377 | -0.809776 |
| 3                | 6                | 0              | -0.575733               | 0.361053  | -0.057901 |
| 4                | 6                | 0              | 0.272211                | 1.149834  | 0.729279  |
| 5                | 6                | 0              | 1.637069                | 0.910210  | 0.766447  |
| 6                | 6                | 0              | 2.142739                | -0.133943 | 0.004392  |
| 7                | 1                | 0              | 1.762331                | -1.742541 | -1.372705 |
| 8                | 1                | 0              | -0.673116               | -1.301589 | -1.423794 |
| 9                | 1                | 0              | -0.141955               | 1.951748  | 1.327962  |
| 10               | 1                | 0              | 2.292566                | 1.515074  | 1.378824  |
| 11               | 6                | 0              | -2.029611               | 0.637111  | -0.101376 |
| 12               | 6                | 0              | -2.517724               | 1.877122  | -0.296771 |
| 13               | 1                | 0              | -3.588728               | 2.057356  | -0.329762 |
| 14               | 6                | 0              | -3.018798               | -0.431816 | 0.067457  |
| 15               | 1                | 0              | -4.065108               | -0.112996 | -0.035805 |
| 16               | 7                | 0              | -2.721755               | -1.637064 | 0.333163  |
| 17               | 6                | 0              | -3.823577               | -2.570846 | 0.484815  |
| 18               | 1                | 0              | -3.725728               | -3.369424 | -0.255679 |
| 19               | 1                | 0              | -3.764397               | -3.040927 | 1.469834  |
| 20               | 1                | 0              | -4.808015               | -2.100732 | 0.370985  |
| 21               | 8                | 0              | -1.730247               | 2.948665  | -0.482285 |
| 22               | 1                | 0              | -2.268408               | 3.735429  | -0.633742 |
| 23               | 7                | 0              | 3.583793                | -0.395875 | 0.036224  |
| 24               | 8                | 0              | 4.290843                | 0.343142  | 0.694862  |
| 25               | 8                | 0              | 4.013292                | -1.340887 | -0.597809 |

### Structure 33k (vacuum)

Energy (Hartrees): -722.031200691  
No imaginary frequencies

Standard orientation:

| Center<br>Number | Atomic<br>Number | Atomic<br>Type | Coordinates (Angstroms) |           |           |
|------------------|------------------|----------------|-------------------------|-----------|-----------|
|                  |                  |                | X                       | Y         | Z         |
| 1                | 6                | 0              | -1.496241               | 0.908273  | -0.693896 |
| 2                | 6                | 0              | -0.124004               | 0.719357  | -0.709327 |
| 3                | 6                | 0              | 0.454901                | -0.377048 | -0.057738 |
| 4                | 6                | 0              | -0.375055               | -1.267488 | 0.632462  |
| 5                | 6                | 0              | -1.751908               | -1.095756 | 0.653433  |
| 6                | 6                | 0              | -2.287579               | -0.007349 | -0.014574 |
| 7                | 1                | 0              | -1.959980               | 1.745876  | -1.196908 |
| 8                | 1                | 0              | 0.510133                | 1.425232  | -1.226569 |
| 9                | 1                | 0              | 0.065954                | -2.090051 | 1.183134  |
| 10               | 1                | 0              | -2.404041               | -1.774257 | 1.186321  |
| 11               | 6                | 0              | 1.916806                | -0.610022 | -0.113377 |
| 12               | 6                | 0              | 2.367572                | -1.851535 | -0.356665 |
| 13               | 1                | 0              | 1.681657                | -2.670917 | -0.551599 |
| 14               | 6                | 0              | 2.879749                | 0.484400  | 0.089796  |
| 15               | 1                | 0              | 3.936501                | 0.201672  | 0.011935  |
| 16               | 7                | 0              | 2.520639                | 1.671557  | 0.346928  |
| 17               | 6                | 0              | 3.564019                | 2.657206  | 0.540416  |
| 18               | 1                | 0              | 3.434574                | 3.461258  | -0.188017 |
| 19               | 1                | 0              | 3.449688                | 3.102854  | 1.531198  |
| 20               | 1                | 0              | 4.576552                | 2.244260  | 0.444570  |
| 21               | 8                | 0              | 3.688206                | -2.150893 | -0.382385 |
| 22               | 1                | 0              | 3.820239                | -3.055354 | -0.672898 |
| 23               | 7                | 0              | -3.749583               | 0.189846  | 0.007007  |
| 24               | 8                | 0              | -4.418323               | -0.630969 | 0.598672  |
| 25               | 8                | 0              | -4.194663               | 1.159286  | -0.569023 |

### Structure 33k (CHCl<sub>3</sub>)

Energy (Hartrees): -722.052752164  
No imaginary frequencies

Standard orientation:

| Center<br>Number | Atomic<br>Number | Atomic<br>Type | Coordinates (Angstroms) |           |           |
|------------------|------------------|----------------|-------------------------|-----------|-----------|
|                  |                  |                | X                       | Y         | Z         |
| 1                | 6                | 0              | -1.501248               | 0.905671  | -0.706203 |
| 2                | 6                | 0              | -0.129889               | 0.714277  | -0.725861 |
| 3                | 6                | 0              | 0.453181                | -0.376592 | -0.065479 |
| 4                | 6                | 0              | -0.375210               | -1.263116 | 0.634072  |
| 5                | 6                | 0              | -1.751327               | -1.090851 | 0.658619  |
| 6                | 6                | 0              | -2.290340               | -0.005107 | -0.014627 |
| 7                | 1                | 0              | -1.958479               | 1.740969  | -1.219609 |
| 8                | 1                | 0              | 0.497351                | 1.411153  | -1.264966 |
| 9                | 1                | 0              | 0.065272                | -2.085921 | 1.184895  |
| 10               | 1                | 0              | -2.393050               | -1.772149 | 1.201156  |
| 11               | 6                | 0              | 1.914539                | -0.606724 | -0.123056 |
| 12               | 6                | 0              | 2.365898                | -1.855378 | -0.346799 |
| 13               | 1                | 0              | 1.683475                | -2.682345 | -0.521681 |
| 14               | 6                | 0              | 2.876205                | 0.489237  | 0.061799  |
| 15               | 1                | 0              | 3.929706                | 0.221958  | -0.079444 |
| 16               | 7                | 0              | 2.530540                | 1.667701  | 0.380187  |
| 17               | 6                | 0              | 3.586067                | 2.648054  | 0.546732  |
| 18               | 1                | 0              | 3.427786                | 3.469205  | -0.157527 |
| 19               | 1                | 0              | 3.521257                | 3.073180  | 1.551578  |
| 20               | 1                | 0              | 4.590773                | 2.233770  | 0.395313  |
| 21               | 8                | 0              | 3.680045                | -2.151615 | -0.379850 |
| 22               | 1                | 0              | 3.805088                | -3.072593 | -0.635022 |
| 23               | 7                | 0              | -3.745633               | 0.192432  | 0.011093  |
| 24               | 8                | 0              | -4.423431               | -0.628966 | 0.596464  |
| 25               | 8                | 0              | -4.200462               | 1.166207  | -0.555218 |

### Structure 33k (DMSO)

Energy (Hartrees): -722.051728935  
No imaginary frequencies

Standard orientation:

| Center<br>Number | Atomic<br>Number | Atomic<br>Type | Coordinates (Angstroms) |           |           |
|------------------|------------------|----------------|-------------------------|-----------|-----------|
|                  |                  |                | X                       | Y         | Z         |
| 1                | 6                | 0              | -1.501250               | 0.892885  | -0.722744 |
| 2                | 6                | 0              | -0.130212               | 0.700800  | -0.744307 |
| 3                | 6                | 0              | 0.455510                | -0.383742 | -0.074754 |
| 4                | 6                | 0              | -0.370476               | -1.267690 | 0.630917  |
| 5                | 6                | 0              | -1.746531               | -1.093643 | 0.658688  |
| 6                | 6                | 0              | -2.287868               | -0.011130 | -0.018657 |
| 7                | 1                | 0              | -1.956850               | 1.723719  | -1.244777 |
| 8                | 1                | 0              | 0.493792                | 1.391098  | -1.296730 |
| 9                | 1                | 0              | 0.069873                | -2.092205 | 1.179543  |
| 10               | 1                | 0              | -2.383562               | -1.774116 | 1.207843  |
| 11               | 6                | 0              | 1.917819                | -0.605149 | -0.131783 |
| 12               | 6                | 0              | 2.377371                | -1.854382 | -0.339058 |
| 13               | 1                | 0              | 1.699680                | -2.688730 | -0.496541 |
| 14               | 6                | 0              | 2.867701                | 0.502652  | 0.038333  |
| 15               | 1                | 0              | 3.917970                | 0.265044  | -0.163594 |
| 16               | 7                | 0              | 2.516515                | 1.663550  | 0.414076  |
| 17               | 6                | 0              | 3.561259                | 2.660581  | 0.558338  |
| 18               | 1                | 0              | 3.327624                | 3.520294  | -0.075539 |
| 19               | 1                | 0              | 3.572305                | 3.019298  | 1.591071  |
| 20               | 1                | 0              | 4.557835                | 2.283495  | 0.298192  |
| 21               | 8                | 0              | 3.692309                | -2.139726 | -0.372116 |
| 22               | 1                | 0              | 3.819891                | -3.067189 | -0.605244 |
| 23               | 7                | 0              | -3.741533               | 0.190666  | 0.014985  |
| 24               | 8                | 0              | -4.417510               | -0.613135 | 0.627903  |
| 25               | 8                | 0              | -4.200220               | 1.151948  | -0.571725 |

### Structure 33k (C<sub>2</sub>H<sub>5</sub>OH)

Energy (Hartrees): -722.055500279  
No imaginary frequencies

Standard orientation:

| Center<br>Number | Atomic<br>Number | Atomic<br>Type | Coordinates (Angstroms) |           |           |
|------------------|------------------|----------------|-------------------------|-----------|-----------|
|                  |                  |                | X                       | Y         | Z         |
| 1                | 6                | 0              | -1.503455               | 0.892307  | -0.727317 |
| 2                | 6                | 0              | -0.133111               | 0.699277  | -0.747488 |
| 3                | 6                | 0              | 0.452739                | -0.381452 | -0.071244 |
| 4                | 6                | 0              | -0.373489               | -1.261470 | 0.639747  |
| 5                | 6                | 0              | -1.749050               | -1.087573 | 0.666582  |
| 6                | 6                | 0              | -2.289709               | -0.008345 | -0.017437 |
| 7                | 1                | 0              | -1.958388               | 1.719693  | -1.255717 |
| 8                | 1                | 0              | 0.490755                | 1.384969  | -1.305729 |
| 9                | 1                | 0              | 0.067001                | -2.081964 | 1.194232  |
| 10               | 1                | 0              | -2.385794               | -1.764499 | 1.220610  |
| 11               | 6                | 0              | 1.914207                | -0.604602 | -0.129291 |
| 12               | 6                | 0              | 2.371406                | -1.854803 | -0.340185 |
| 13               | 1                | 0              | 1.696293                | -2.690728 | -0.498901 |
| 14               | 6                | 0              | 2.867786                | 0.500226  | 0.036508  |
| 15               | 1                | 0              | 3.914497                | 0.260230  | -0.180813 |
| 16               | 7                | 0              | 2.526684                | 1.660553  | 0.424499  |
| 17               | 6                | 0              | 3.580082                | 2.651082  | 0.554510  |
| 18               | 1                | 0              | 3.342333                | 3.513282  | -0.074241 |
| 19               | 1                | 0              | 3.610403                | 3.009126  | 1.586929  |
| 20               | 1                | 0              | 4.570277                | 2.269264  | 0.277998  |
| 21               | 8                | 0              | 3.685730                | -2.142440 | -0.377644 |
| 22               | 1                | 0              | 3.817287                | -3.068596 | -0.614090 |
| 23               | 7                | 0              | -3.739039               | 0.192488  | 0.013913  |
| 24               | 8                | 0              | -4.422184               | -0.613433 | 0.617772  |
| 25               | 8                | 0              | -4.201373               | 1.157131  | -0.565812 |

### Structure 331 (vacuum)

Energy (Hartrees): -722.029841016  
No imaginary frequencies

Standard orientation:

| Center<br>Number | Atomic<br>Number | Atomic<br>Type | Coordinates (Angstroms) |           |           |
|------------------|------------------|----------------|-------------------------|-----------|-----------|
|                  |                  |                | X                       | Y         | Z         |
| 1                | 6                | 0              | -1.490491               | 0.893809  | -0.715019 |
| 2                | 6                | 0              | -0.118847               | 0.702503  | -0.733883 |
| 3                | 6                | 0              | 0.462194                | -0.382409 | -0.065982 |
| 4                | 6                | 0              | -0.364486               | -1.261539 | 0.641224  |
| 5                | 6                | 0              | -1.741261               | -1.087615 | 0.666101  |
| 6                | 6                | 0              | -2.279020               | -0.009341 | -0.015985 |
| 7                | 1                | 0              | -1.956124               | 1.722621  | -1.230712 |
| 8                | 1                | 0              | 0.511489                | 1.398150  | -1.269893 |
| 9                | 1                | 0              | 0.078234                | -2.078601 | 1.198640  |
| 10               | 1                | 0              | -2.391178               | -1.757672 | 1.212252  |
| 11               | 6                | 0              | 1.925913                | -0.618459 | -0.122883 |
| 12               | 6                | 0              | 2.360305                | -1.870902 | -0.368571 |
| 13               | 1                | 0              | 1.659487                | -2.673381 | -0.568717 |
| 14               | 6                | 0              | 2.865998                | 0.491064  | 0.077899  |
| 15               | 1                | 0              | 3.938721                | 0.266132  | -0.044256 |
| 16               | 7                | 0              | 2.505064                | 1.667274  | 0.373787  |
| 17               | 6                | 0              | 3.534004                | 2.669389  | 0.549575  |
| 18               | 1                | 0              | 3.370204                | 3.478382  | -0.166142 |
| 19               | 1                | 0              | 3.439337                | 3.101781  | 1.547961  |
| 20               | 1                | 0              | 4.551879                | 2.277026  | 0.420894  |
| 21               | 8                | 0              | 3.627268                | -2.319343 | -0.426541 |
| 22               | 1                | 0              | 4.255519                | -1.629323 | -0.195217 |
| 23               | 7                | 0              | -3.740719               | 0.191520  | 0.011158  |
| 24               | 8                | 0              | -4.406842               | -0.614579 | 0.625006  |
| 25               | 8                | 0              | -4.187155               | 1.149461  | -0.582749 |

### Structure 331 (CHCl<sub>3</sub>)

Energy (Hartrees): -722.050877629  
No imaginary frequencies

Standard orientation:

| Center<br>Number | Atomic<br>Number | Atomic<br>Type | Coordinates (Angstroms) |           |           |
|------------------|------------------|----------------|-------------------------|-----------|-----------|
|                  |                  |                | X                       | Y         | Z         |
| 1                | 6                | 0              | -1.493247               | 0.895399  | -0.719209 |
| 2                | 6                | 0              | -0.122592               | 0.701622  | -0.741506 |
| 3                | 6                | 0              | 0.461184                | -0.383719 | -0.073152 |
| 4                | 6                | 0              | -0.365017               | -1.263045 | 0.636796  |
| 5                | 6                | 0              | -1.741132               | -1.088315 | 0.664665  |
| 6                | 6                | 0              | -2.280845               | -0.008179 | -0.016288 |
| 7                | 1                | 0              | -1.951181               | 1.726300  | -1.239029 |
| 8                | 1                | 0              | 0.503241                | 1.393335  | -1.289530 |
| 9                | 1                | 0              | 0.076148                | -2.083056 | 1.191217  |
| 10               | 1                | 0              | -2.381638               | -1.764230 | 1.215304  |
| 11               | 6                | 0              | 1.924031                | -0.615811 | -0.136396 |
| 12               | 6                | 0              | 2.360091                | -1.873673 | -0.356751 |
| 13               | 1                | 0              | 1.662199                | -2.684847 | -0.535053 |
| 14               | 6                | 0              | 2.865314                | 0.498863  | 0.031991  |
| 15               | 1                | 0              | 3.920938                | 0.299858  | -0.202948 |
| 16               | 7                | 0              | 2.512291                | 1.651571  | 0.424254  |
| 17               | 6                | 0              | 3.541752                | 2.663445  | 0.553660  |
| 18               | 1                | 0              | 3.279703                | 3.523033  | -0.068481 |
| 19               | 1                | 0              | 3.565852                | 3.014908  | 1.588253  |
| 20               | 1                | 0              | 4.540454                | 2.306915  | 0.270711  |
| 21               | 8                | 0              | 3.627810                | -2.313051 | -0.409548 |
| 22               | 1                | 0              | 4.260392                | -1.620448 | -0.180980 |
| 23               | 7                | 0              | -3.735947               | 0.192626  | 0.013699  |
| 24               | 8                | 0              | -4.412585               | -0.620002 | 0.612164  |
| 25               | 8                | 0              | -4.191195               | 1.160470  | -0.562366 |

### Structure 331 (DMSO)

Energy (Hartrees): -722.050281068  
No imaginary frequencies

Standard orientation:

| Center<br>Number | Atomic<br>Number | Atomic<br>Type | Coordinates (Angstroms) |           |           |
|------------------|------------------|----------------|-------------------------|-----------|-----------|
|                  |                  |                | X                       | Y         | Z         |
| 1                | 6                | 0              | -1.493872               | 0.876489  | -0.743992 |
| 2                | 6                | 0              | -0.123078               | 0.683593  | -0.766153 |
| 3                | 6                | 0              | 0.463766                | -0.388277 | -0.078077 |
| 4                | 6                | 0              | -0.359049               | -1.257863 | 0.647636  |
| 5                | 6                | 0              | -1.735064               | -1.081485 | 0.678650  |
| 6                | 6                | 0              | -2.277988               | -0.012871 | -0.018487 |
| 7                | 1                | 0              | -1.951310               | 1.696556  | -1.281231 |
| 8                | 1                | 0              | 0.499579                | 1.363264  | -1.333529 |
| 9                | 1                | 0              | 0.083310                | -2.073146 | 1.208340  |
| 10               | 1                | 0              | -2.370299               | -1.750554 | 1.243683  |
| 11               | 6                | 0              | 1.927487                | -0.613955 | -0.138504 |
| 12               | 6                | 0              | 2.366810                | -1.871527 | -0.354979 |
| 13               | 1                | 0              | 1.669401                | -2.685836 | -0.521445 |
| 14               | 6                | 0              | 2.861361                | 0.506217  | 0.033682  |
| 15               | 1                | 0              | 3.919282                | 0.319867  | -0.197697 |
| 16               | 7                | 0              | 2.497371                | 1.653930  | 0.434056  |
| 17               | 6                | 0              | 3.521394                | 2.672718  | 0.569748  |
| 18               | 1                | 0              | 3.255515                | 3.532799  | -0.050566 |
| 19               | 1                | 0              | 3.542208                | 3.020518  | 1.605881  |
| 20               | 1                | 0              | 4.521282                | 2.321809  | 0.286980  |
| 21               | 8                | 0              | 3.634945                | -2.304620 | -0.417164 |
| 22               | 1                | 0              | 4.266000                | -1.600851 | -0.215141 |
| 23               | 7                | 0              | -3.731844               | 0.190127  | 0.015982  |
| 24               | 8                | 0              | -4.402588               | -0.581256 | 0.674417  |
| 25               | 8                | 0              | -4.195389               | 1.119493  | -0.616339 |

### Structure 331 (C<sub>2</sub>H<sub>5</sub>OH)

Energy (Hartrees): -722.053386335  
No imaginary frequencies

Standard orientation:

| Center<br>Number | Atomic<br>Number | Atomic<br>Type | Coordinates (Angstroms) |           |           |
|------------------|------------------|----------------|-------------------------|-----------|-----------|
|                  |                  |                | X                       | Y         | Z         |
| 1                | 6                | 0              | -1.496369               | 0.889262  | -0.732567 |
| 2                | 6                | 0              | -0.126494               | 0.694026  | -0.758380 |
| 3                | 6                | 0              | 0.460315                | -0.386802 | -0.083533 |
| 4                | 6                | 0              | -0.364046               | -1.265198 | 0.631025  |
| 5                | 6                | 0              | -1.739458               | -1.089899 | 0.662684  |
| 6                | 6                | 0              | -2.281073               | -0.010331 | -0.019417 |
| 7                | 1                | 0              | -1.952137               | 1.717505  | -1.258878 |
| 8                | 1                | 0              | 0.495810                | 1.379542  | -1.318913 |
| 9                | 1                | 0              | 0.077321                | -2.085845 | 1.184497  |
| 10               | 1                | 0              | -2.374700               | -1.766021 | 1.219392  |
| 11               | 6                | 0              | 1.923344                | -0.612639 | -0.144254 |
| 12               | 6                | 0              | 2.361883                | -1.871961 | -0.352730 |
| 13               | 1                | 0              | 1.666168                | -2.686426 | -0.525621 |
| 14               | 6                | 0              | 2.861183                | 0.506595  | 0.014805  |
| 15               | 1                | 0              | 3.906172                | 0.322285  | -0.267870 |
| 16               | 7                | 0              | 2.512019                | 1.645338  | 0.453860  |
| 17               | 6                | 0              | 3.541025                | 2.663350  | 0.559230  |
| 18               | 1                | 0              | 3.255032                | 3.526428  | -0.047740 |
| 19               | 1                | 0              | 3.598279                | 3.007946  | 1.594889  |
| 20               | 1                | 0              | 4.530566                | 2.313957  | 0.240887  |
| 21               | 8                | 0              | 3.631815                | -2.307163 | -0.396795 |
| 22               | 1                | 0              | 4.265680                | -1.616189 | -0.162912 |
| 23               | 7                | 0              | -3.730055               | 0.193136  | 0.019129  |
| 24               | 8                | 0              | -4.411687               | -0.612794 | 0.624513  |
| 25               | 8                | 0              | -4.193103               | 1.159842  | -0.556448 |

### Structure 34a (vacuum)

Energy (Hartrees): -536.978895452  
No imaginary frequencies

Standard orientation:

| Center<br>Number | Atomic<br>Number | Atomic<br>Type | Coordinates (Angstroms) |           |           |
|------------------|------------------|----------------|-------------------------|-----------|-----------|
|                  |                  |                | X                       | Y         | Z         |
| 1                | 6                | 0              | -1.830055               | 0.975128  | 0.671377  |
| 2                | 6                | 0              | -3.219463               | 0.977588  | 0.684548  |
| 3                | 6                | 0              | -3.931284               | -0.020250 | 0.025805  |
| 4                | 6                | 0              | -3.235326               | -1.013491 | -0.655723 |
| 5                | 6                | 0              | -1.845832               | -1.003606 | -0.684701 |
| 6                | 6                | 0              | -1.113327               | -0.016642 | -0.012168 |
| 7                | 1                | 0              | -1.290431               | 1.738280  | 1.221681  |
| 8                | 1                | 0              | -3.748388               | 1.755095  | 1.224082  |
| 9                | 1                | 0              | -5.014415               | -0.021006 | 0.039725  |
| 10               | 1                | 0              | -3.776469               | -1.789365 | -1.185441 |
| 11               | 1                | 0              | -1.317139               | -1.755760 | -1.260171 |
| 12               | 6                | 0              | 0.365818                | -0.017373 | -0.016815 |
| 13               | 6                | 0              | 1.045853                | -1.200173 | 0.114784  |
| 14               | 6                | 0              | 1.070052                | 1.241772  | -0.158353 |
| 15               | 1                | 0              | 0.480953                | -2.119704 | 0.254292  |
| 16               | 1                | 0              | 0.435569                | 2.129438  | -0.293085 |
| 17               | 1                | 0              | 2.907133                | -0.477639 | 0.020108  |
| 18               | 7                | 0              | 2.345779                | 1.362593  | -0.161953 |
| 19               | 7                | 0              | 2.378998                | -1.347449 | 0.097589  |
| 20               | 6                | 0              | 2.893079                | 2.691807  | -0.340738 |
| 21               | 1                | 0              | 3.537512                | 2.707763  | -1.223609 |
| 22               | 1                | 0              | 2.118026                | 3.460526  | -0.458214 |
| 23               | 1                | 0              | 3.516448                | 2.950865  | 0.519198  |
| 24               | 6                | 0              | 3.041135                | -2.596272 | 0.400924  |
| 25               | 1                | 0              | 2.344752                | -3.422173 | 0.247601  |
| 26               | 1                | 0              | 3.893003                | -2.741930 | -0.264915 |
| 27               | 1                | 0              | 3.396105                | -2.631340 | 1.435661  |

### Structure 34a (CHCl<sub>3</sub>)

Energy (Hartrees): -536.996069614  
No imaginary frequencies

Standard orientation:

| Center<br>Number | Atomic<br>Number | Atomic<br>Type | Coordinates (Angstroms) |           |           |
|------------------|------------------|----------------|-------------------------|-----------|-----------|
|                  |                  |                | X                       | Y         | Z         |
| 1                | 6                | 0              | -1.831439               | 1.005400  | 0.625665  |
| 2                | 6                | 0              | -3.221916               | 1.005778  | 0.637756  |
| 3                | 6                | 0              | -3.933201               | -0.022240 | 0.024709  |
| 4                | 6                | 0              | -3.233483               | -1.044851 | -0.610532 |
| 5                | 6                | 0              | -1.843365               | -1.034223 | -0.639825 |
| 6                | 6                | 0              | -1.109973               | -0.015446 | -0.012703 |
| 7                | 1                | 0              | -1.297305               | 1.796604  | 1.141062  |
| 8                | 1                | 0              | -3.751187               | 1.806736  | 1.142581  |
| 9                | 1                | 0              | -5.016871               | -0.024452 | 0.038518  |
| 10               | 1                | 0              | -3.772008               | -1.846219 | -1.104836 |
| 11               | 1                | 0              | -1.316612               | -1.816500 | -1.176187 |
| 12               | 6                | 0              | 0.369784                | -0.014365 | -0.016909 |
| 13               | 6                | 0              | 1.049987                | -1.203136 | 0.113088  |
| 14               | 6                | 0              | 1.071022                | 1.246082  | -0.155614 |
| 15               | 1                | 0              | 0.487584                | -2.124987 | 0.246028  |
| 16               | 1                | 0              | 0.438220                | 2.132572  | -0.299006 |
| 17               | 1                | 0              | 2.919876                | -0.493248 | 0.029771  |
| 18               | 7                | 0              | 2.348178                | 1.373162  | -0.148043 |
| 19               | 7                | 0              | 2.378370                | -1.353501 | 0.104637  |
| 20               | 6                | 0              | 2.886691                | 2.707840  | -0.327303 |
| 21               | 1                | 0              | 3.527454                | 2.731094  | -1.213505 |
| 22               | 1                | 0              | 2.106802                | 3.472027  | -0.438539 |



|    |   |   |          |           |           |
|----|---|---|----------|-----------|-----------|
| 23 | 1 | 0 | 3.514140 | 2.969609  | 0.529464  |
| 24 | 6 | 0 | 3.038327 | -2.613952 | 0.375942  |
| 25 | 1 | 0 | 2.323588 | -3.428766 | 0.253943  |
| 26 | 1 | 0 | 3.860031 | -2.765904 | -0.325497 |
| 27 | 1 | 0 | 3.435845 | -2.647500 | 1.394398  |

### Structure 34a (DMSO)

Energy (Hartrees): -536.991996214

No imaginary frequencies

Standard orientation:

| Center<br>Number | Atomic<br>Number | Atomic<br>Type | Coordinates (Angstroms) |           |           |
|------------------|------------------|----------------|-------------------------|-----------|-----------|
|                  |                  |                | X                       | Y         | Z         |
| 1                | 6                | 0              | -1.832586               | 1.020907  | 0.600279  |
| 2                | 6                | 0              | -3.223701               | 1.020771  | 0.610176  |
| 3                | 6                | 0              | -3.934313               | -0.022759 | 0.022455  |
| 4                | 6                | 0              | -3.232457               | -1.061435 | -0.584942 |
| 5                | 6                | 0              | -1.841960               | -1.051421 | -0.612870 |
| 6                | 6                | 0              | -1.108899               | -0.015541 | -0.011675 |
| 7                | 1                | 0              | -1.302035               | 1.826773  | 1.096371  |
| 8                | 1                | 0              | -3.753424               | 1.834228  | 1.094379  |
| 9                | 1                | 0              | -5.018133               | -0.025197 | 0.034774  |
| 10               | 1                | 0              | -3.769452               | -1.876207 | -1.058792 |
| 11               | 1                | 0              | -1.316867               | -1.850365 | -1.126022 |
| 12               | 6                | 0              | 0.370981                | -0.012690 | -0.015250 |
| 13               | 6                | 0              | 1.052350                | -1.204165 | 0.111436  |
| 14               | 6                | 0              | 1.070544                | 1.248664  | -0.151879 |
| 15               | 1                | 0              | 0.491208                | -2.127438 | 0.238369  |
| 16               | 1                | 0              | 0.439411                | 2.135507  | -0.297832 |
| 17               | 1                | 0              | 2.926088                | -0.498287 | 0.032379  |
| 18               | 7                | 0              | 2.348488                | 1.376895  | -0.139282 |
| 19               | 7                | 0              | 2.378712                | -1.354662 | 0.105633  |
| 20               | 6                | 0              | 2.884784                | 2.713527  | -0.320343 |
| 21               | 1                | 0              | 3.527051                | 2.736626  | -1.205669 |
| 22               | 1                | 0              | 2.102985                | 3.475079  | -0.433712 |
| 23               | 1                | 0              | 3.511205                | 2.978314  | 0.536387  |
| 24               | 6                | 0              | 3.037765                | -2.620418 | 0.361841  |
| 25               | 1                | 0              | 2.320167                | -3.431809 | 0.236379  |
| 26               | 1                | 0              | 3.856263                | -2.764894 | -0.344650 |
| 27               | 1                | 0              | 3.440080                | -2.660593 | 1.377805  |

### Structure 34a (C<sub>2</sub>H<sub>5</sub>OH)

Energy (Hartrees): -536.995006557

No imaginary frequencies

Standard orientation:

| Center<br>Number | Atomic<br>Number | Atomic<br>Type | Coordinates (Angstroms) |           |           |
|------------------|------------------|----------------|-------------------------|-----------|-----------|
|                  |                  |                | X                       | Y         | Z         |
| 1                | 6                | 0              | -1.829931               | 1.012890  | 0.613822  |
| 2                | 6                | 0              | -3.220982               | 1.012637  | 0.624730  |
| 3                | 6                | 0              | -3.931937               | -0.023101 | 0.023680  |
| 4                | 6                | 0              | -3.230723               | -1.053603 | -0.598087 |
| 5                | 6                | 0              | -1.840217               | -1.043116 | -0.626710 |
| 6                | 6                | 0              | -1.107011               | -0.015501 | -0.012127 |
| 7                | 1                | 0              | -1.298516               | 1.812007  | 1.120078  |
| 8                | 1                | 0              | -3.750555               | 1.819813  | 1.119738  |
| 9                | 1                | 0              | -5.015870               | -0.025590 | 0.036618  |
| 10               | 1                | 0              | -3.768170               | -1.862063 | -1.082393 |
| 11               | 1                | 0              | -1.314805               | -1.834640 | -1.151105 |
| 12               | 6                | 0              | 0.373113                | -0.013384 | -0.016776 |
| 13               | 6                | 0              | 1.052103                | -1.205419 | 0.108876  |

|    |   |   |          |           |           |
|----|---|---|----------|-----------|-----------|
| 14 | 6 | 0 | 1.071765 | 1.248584  | -0.151452 |
| 15 | 1 | 0 | 0.489213 | -2.127286 | 0.238451  |
| 16 | 1 | 0 | 0.437905 | 2.134795  | -0.288699 |
| 17 | 1 | 0 | 2.927966 | -0.504688 | 0.030097  |
| 18 | 7 | 0 | 2.349751 | 1.379815  | -0.146902 |
| 19 | 7 | 0 | 2.378912 | -1.359486 | 0.099912  |
| 20 | 6 | 0 | 2.877418 | 2.721244  | -0.322018 |
| 21 | 1 | 0 | 3.508550 | 2.756513  | -1.214858 |
| 22 | 1 | 0 | 2.091302 | 3.480463  | -0.418379 |
| 23 | 1 | 0 | 3.513113 | 2.981241  | 0.529234  |
| 24 | 6 | 0 | 3.033022 | -2.624713 | 0.372334  |
| 25 | 1 | 0 | 2.318043 | -3.436791 | 0.236474  |
| 26 | 1 | 0 | 3.863603 | -2.772218 | -0.319220 |
| 27 | 1 | 0 | 3.417861 | -2.662976 | 1.395261  |

### Structure 34b (vacuum)

Energy (Hartrees): -536.970529211  
No imaginary frequencies

Standard orientation:

| Center<br>Number | Atomic<br>Number | Atomic<br>Type | Coordinates (Angstroms) |           |           |
|------------------|------------------|----------------|-------------------------|-----------|-----------|
|                  |                  |                | X                       | Y         | Z         |
| 1                | 6                | 0              | -1.320792               | -1.291246 | 0.748423  |
| 2                | 6                | 0              | -2.687567               | -1.538279 | 0.790718  |
| 3                | 6                | 0              | -3.563985               | -0.769087 | 0.031137  |
| 4                | 6                | 0              | -3.058065               | 0.241889  | -0.779472 |
| 5                | 6                | 0              | -1.689220               | 0.482567  | -0.828202 |
| 6                | 6                | 0              | -0.795156               | -0.273740 | -0.058472 |
| 7                | 1                | 0              | -0.648429               | -1.882555 | 1.361184  |
| 8                | 1                | 0              | -3.070816               | -2.327930 | 1.426666  |
| 9                | 1                | 0              | -4.629913               | -0.959378 | 0.066709  |
| 10               | 1                | 0              | -3.729152               | 0.836266  | -1.389130 |
| 11               | 1                | 0              | -1.298652               | 1.243545  | -1.495899 |
| 12               | 6                | 0              | 0.662418                | -0.025318 | -0.099291 |
| 13               | 6                | 0              | 1.206620                | 1.215268  | -0.036899 |
| 14               | 6                | 0              | 1.565478                | -1.181903 | -0.185093 |
| 15               | 1                | 0              | 1.071015                | -2.143952 | -0.391278 |
| 16               | 1                | 0              | 2.290700                | 1.285022  | -0.076885 |
| 17               | 7                | 0              | 2.825813                | -1.115313 | -0.051723 |
| 18               | 7                | 0              | 0.554408                | 2.406192  | 0.064971  |
| 19               | 1                | 0              | -0.427813               | 2.361376  | 0.300480  |
| 20               | 6                | 0              | 1.263869                | 3.602184  | 0.481564  |
| 21               | 1                | 0              | 2.216590                | 3.653194  | -0.046895 |
| 22               | 1                | 0              | 0.681499                | 4.483107  | 0.211702  |
| 23               | 1                | 0              | 1.461271                | 3.624336  | 1.559008  |
| 24               | 6                | 0              | 3.583695                | -2.337382 | -0.209812 |
| 25               | 1                | 0              | 4.307650                | -2.215406 | -1.019857 |
| 26               | 1                | 0              | 4.155151                | -2.531103 | 0.701896  |
| 27               | 1                | 0              | 2.955574                | -3.212398 | -0.428039 |

### Structure 34b (CHCl<sub>3</sub>)

Energy (Hartrees): -536.989413282  
No imaginary frequencies

Standard orientation:

| Center<br>Number | Atomic<br>Number | Atomic<br>Type | Coordinates (Angstroms) |           |          |
|------------------|------------------|----------------|-------------------------|-----------|----------|
|                  |                  |                | X                       | Y         | Z        |
| 1                | 6                | 0              | -1.329052               | -1.304276 | 0.720065 |
| 2                | 6                | 0              | -2.697578               | -1.548274 | 0.754045 |
| 3                | 6                | 0              | -3.572714               | -0.747929 | 0.024375 |

|    |   |   |           |           |           |
|----|---|---|-----------|-----------|-----------|
| 4  | 6 | 0 | -3.062528 | 0.291570  | -0.748204 |
| 5  | 6 | 0 | -1.692462 | 0.529809  | -0.788803 |
| 6  | 6 | 0 | -0.798384 | -0.258596 | -0.049464 |
| 7  | 1 | 0 | -0.660761 | -1.923522 | 1.309970  |
| 8  | 1 | 0 | -3.082051 | -2.360935 | 1.360462  |
| 9  | 1 | 0 | -4.639708 | -0.936095 | 0.053103  |
| 10 | 1 | 0 | -3.731333 | 0.911953  | -1.334746 |
| 11 | 1 | 0 | -1.306336 | 1.317312  | -1.427742 |
| 12 | 6 | 0 | 0.662336  | -0.021600 | -0.088218 |
| 13 | 6 | 0 | 1.222998  | 1.218855  | -0.024331 |
| 14 | 6 | 0 | 1.545280  | -1.188384 | -0.186753 |
| 15 | 1 | 0 | 1.037340  | -2.132789 | -0.430875 |
| 16 | 1 | 0 | 2.306849  | 1.281694  | -0.079626 |
| 17 | 7 | 0 | 2.807910  | -1.163935 | -0.025939 |
| 18 | 7 | 0 | 0.597496  | 2.411149  | 0.096924  |
| 19 | 1 | 0 | -0.386873 | 2.401419  | 0.330383  |
| 20 | 6 | 0 | 1.331982  | 3.616930  | 0.441955  |
| 21 | 1 | 0 | 2.267579  | 3.641275  | -0.118055 |
| 22 | 1 | 0 | 0.743166  | 4.490358  | 0.162266  |
| 23 | 1 | 0 | 1.559650  | 3.671033  | 1.511623  |
| 24 | 6 | 0 | 3.528489  | -2.405884 | -0.223635 |
| 25 | 1 | 0 | 4.253287  | -2.285665 | -1.034095 |
| 26 | 1 | 0 | 4.098546  | -2.646429 | 0.678320  |
| 27 | 1 | 0 | 2.872595  | -3.253440 | -0.464078 |

### Structure 34b (DMSO)

Energy (Hartrees): -536.985840554

No imaginary frequencies

Standard orientation:

| Center<br>Number | Atomic<br>Number | Atomic<br>Type | Coordinates (Angstroms) |           |           |
|------------------|------------------|----------------|-------------------------|-----------|-----------|
|                  |                  |                | X                       | Y         | Z         |
| 1                | 6                | 0              | -1.333011               | -1.312863 | 0.705422  |
| 2                | 6                | 0              | -2.702426               | -1.555420 | 0.732924  |
| 3                | 6                | 0              | -3.575655               | -0.739879 | 0.017276  |
| 4                | 6                | 0              | -3.062153               | 0.313975  | -0.734136 |
| 5                | 6                | 0              | -1.691539               | 0.551326  | -0.768141 |
| 6                | 6                | 0              | -0.799032               | -0.252879 | -0.043146 |
| 7                | 1                | 0              | -0.667542               | -1.946376 | 1.283457  |
| 8                | 1                | 0              | -3.088732               | -2.379426 | 1.322897  |
| 9                | 1                | 0              | -4.643197               | -0.926392 | 0.041266  |
| 10               | 1                | 0              | -3.728703               | 0.947635  | -1.309074 |
| 11               | 1                | 0              | -1.307859               | 1.353455  | -1.389995 |
| 12               | 6                | 0              | 0.662652                | -0.021705 | -0.077322 |
| 13               | 6                | 0              | 1.230921                | 1.219297  | -0.009829 |
| 14               | 6                | 0              | 1.536369                | -1.192298 | -0.182946 |
| 15               | 1                | 0              | 1.023297                | -2.129674 | -0.441744 |
| 16               | 1                | 0              | 2.314776                | 1.280147  | -0.070854 |
| 17               | 7                | 0              | 2.800012                | -1.183931 | -0.013236 |
| 18               | 7                | 0              | 0.616246                | 2.409844  | 0.120198  |
| 19               | 1                | 0              | -0.372439               | 2.417475  | 0.336429  |
| 20               | 6                | 0              | 1.354343                | 3.627032  | 0.413966  |
| 21               | 1                | 0              | 2.302696                | 3.610831  | -0.124055 |
| 22               | 1                | 0              | 0.779078                | 4.488561  | 0.075395  |
| 23               | 1                | 0              | 1.555750                | 3.735534  | 1.484292  |
| 24               | 6                | 0              | 3.507701                | -2.431101 | -0.234673 |
| 25               | 1                | 0              | 4.226530                | -2.307098 | -1.050283 |
| 26               | 1                | 0              | 4.083191                | -2.691676 | 0.658434  |
| 27               | 1                | 0              | 2.840326                | -3.267294 | -0.481268 |

### Structure 34b (C<sub>2</sub>H<sub>5</sub>OH)

Energy (Hartrees): -536.989251131  
No imaginary frequencies

Standard orientation:

| Center<br>Number | Atomic<br>Number | Atomic<br>Type | Coordinates (Angstroms) |           |           |
|------------------|------------------|----------------|-------------------------|-----------|-----------|
|                  |                  |                | X                       | Y         | Z         |
| 1                | 6                | 0              | -1.323299               | -1.308346 | 0.712673  |
| 2                | 6                | 0              | -2.691602               | -1.556379 | 0.745168  |
| 3                | 6                | 0              | -3.569444               | -0.751662 | 0.022937  |
| 4                | 6                | 0              | -3.061880               | 0.296780  | -0.739901 |
| 5                | 6                | 0              | -1.692265               | 0.539468  | -0.778819 |
| 6                | 6                | 0              | -0.795403               | -0.253761 | -0.047495 |
| 7                | 1                | 0              | -0.653967               | -1.933040 | 1.296089  |
| 8                | 1                | 0              | -3.073403               | -2.375956 | 1.344365  |
| 9                | 1                | 0              | -4.636246               | -0.942549 | 0.050613  |
| 10               | 1                | 0              | -3.732287               | 0.921989  | -1.319795 |
| 11               | 1                | 0              | -1.312577               | 1.336876  | -1.409302 |
| 12               | 6                | 0              | 0.665653                | -0.016057 | -0.084898 |
| 13               | 6                | 0              | 1.226074                | 1.227444  | -0.017145 |
| 14               | 6                | 0              | 1.542019                | -1.184850 | -0.188224 |
| 15               | 1                | 0              | 1.029530                | -2.122088 | -0.447775 |
| 16               | 1                | 0              | 2.309382                | 1.296788  | -0.075746 |
| 17               | 7                | 0              | 2.805506                | -1.177560 | -0.015477 |
| 18               | 7                | 0              | 0.602877                | 2.415767  | 0.109876  |
| 19               | 1                | 0              | -0.385458               | 2.415211  | 0.327785  |
| 20               | 6                | 0              | 1.337451                | 3.630210  | 0.426414  |
| 21               | 1                | 0              | 2.272810                | 3.642815  | -0.134287 |
| 22               | 1                | 0              | 0.746135                | 4.496200  | 0.129657  |
| 23               | 1                | 0              | 1.563475                | 3.706306  | 1.494770  |
| 24               | 6                | 0              | 3.507391                | -2.429869 | -0.228898 |
| 25               | 1                | 0              | 4.229996                | -2.314811 | -1.042196 |
| 26               | 1                | 0              | 4.078517                | -2.688852 | 0.667270  |
| 27               | 1                | 0              | 2.837240                | -3.264205 | -0.473123 |

### Structure 34c (vacuum)

Energy (Hartrees): -536.971709488  
No imaginary frequencies

Standard orientation:

| Center<br>Number | Atomic<br>Number | Atomic<br>Type | Coordinates (Angstroms) |           |           |
|------------------|------------------|----------------|-------------------------|-----------|-----------|
|                  |                  |                | X                       | Y         | Z         |
| 1                | 6                | 0              | -0.308286               | -1.469955 | 0.880824  |
| 2                | 6                | 0              | -1.293342               | -2.446842 | 0.936333  |
| 3                | 6                | 0              | -2.374212               | -2.408353 | 0.058971  |
| 4                | 6                | 0              | -2.458979               | -1.387261 | -0.880295 |
| 5                | 6                | 0              | -1.471903               | -0.407216 | -0.935327 |
| 6                | 6                | 0              | -0.388970               | -0.429698 | -0.050582 |
| 7                | 1                | 0              | 0.541150                | -1.510366 | 1.550418  |
| 8                | 1                | 0              | -1.215706               | -3.245625 | 1.664878  |
| 9                | 1                | 0              | -3.139917               | -3.173964 | 0.103181  |
| 10               | 1                | 0              | -3.287502               | -1.356820 | -1.578556 |
| 11               | 1                | 0              | -1.526006               | 0.374707  | -1.686302 |
| 12               | 6                | 0              | 0.646295                | 0.631294  | -0.093105 |
| 13               | 6                | 0              | 0.329105                | 1.948647  | -0.061455 |
| 14               | 6                | 0              | 2.066560                | 0.291317  | -0.142958 |
| 15               | 1                | 0              | 1.133693                | 2.680508  | -0.094051 |
| 16               | 1                | 0              | 2.748049                | 1.157823  | -0.179517 |
| 17               | 7                | 0              | 2.517951                | -0.893681 | -0.141212 |
| 18               | 7                | 0              | -0.919437               | 2.501764  | -0.013440 |
| 19               | 1                | 0              | -1.672208               | 1.856408  | 0.186763  |
| 20               | 6                | 0              | 3.953886                | -1.063142 | -0.193706 |
| 21               | 1                | 0              | 4.216368                | -1.650615 | -1.077254 |
| 22               | 1                | 0              | 4.505095                | -0.112324 | -0.223633 |
| 23               | 1                | 0              | 4.284130                | -1.634420 | 0.677986  |

|    |   |   |           |          |           |
|----|---|---|-----------|----------|-----------|
| 24 | 6 | 0 | -1.093107 | 3.857355 | 0.476634  |
| 25 | 1 | 0 | -0.367602 | 4.510790 | -0.010908 |
| 26 | 1 | 0 | -2.089995 | 4.211460 | 0.215760  |
| 27 | 1 | 0 | -0.961433 | 3.938964 | 1.561790  |

### Structure 34c (CHCl<sub>3</sub>)

Energy (Hartrees): -536.991948658

No imaginary frequencies

Standard orientation:

| Center<br>Number | Atomic<br>Number | Atomic<br>Type | Coordinates (Angstroms) |           |           |
|------------------|------------------|----------------|-------------------------|-----------|-----------|
|                  |                  |                | X                       | Y         | Z         |
| 1                | 6                | 0              | -0.742403               | -1.298609 | 0.925326  |
| 2                | 6                | 0              | -1.960131               | -1.967276 | 0.961534  |
| 3                | 6                | 0              | -2.957767               | -1.661251 | 0.038498  |
| 4                | 6                | 0              | -2.725959               | -0.682392 | -0.922564 |
| 5                | 6                | 0              | -1.505082               | -0.012764 | -0.957645 |
| 6                | 6                | 0              | -0.497729               | -0.306923 | -0.032475 |
| 7                | 1                | 0              | 0.032958                | -1.544559 | 1.641324  |
| 8                | 1                | 0              | -2.129993               | -2.731538 | 1.711881  |
| 9                | 1                | 0              | -3.905896               | -2.186132 | 0.065941  |
| 10               | 1                | 0              | -3.491960               | -0.444684 | -1.652408 |
| 11               | 1                | 0              | -1.324454               | 0.737178  | -1.721634 |
| 12               | 6                | 0              | 0.796532                | 0.420054  | -0.056502 |
| 13               | 6                | 0              | 0.863496                | 1.779643  | -0.017586 |
| 14               | 6                | 0              | 2.060572                | -0.302202 | -0.109229 |
| 15               | 1                | 0              | 1.843137                | 2.253555  | -0.033001 |
| 16               | 1                | 0              | 2.957957                | 0.335965  | -0.102679 |
| 17               | 7                | 0              | 2.169339                | -1.569300 | -0.165763 |
| 18               | 7                | 0              | -0.170005               | 2.655190  | 0.022688  |
| 19               | 1                | 0              | -1.091689               | 2.272006  | 0.188622  |
| 20               | 6                | 0              | 3.510164                | -2.117871 | -0.218586 |
| 21               | 1                | 0              | 3.632279                | -2.695230 | -1.139677 |
| 22               | 1                | 0              | 4.295104                | -1.350310 | -0.178250 |
| 23               | 1                | 0              | 3.656416                | -2.812797 | 0.613243  |
| 24               | 6                | 0              | 0.035765                | 4.040520  | 0.409113  |
| 25               | 1                | 0              | 0.917770                | 4.430863  | -0.101138 |
| 26               | 1                | 0              | -0.825862               | 4.632016  | 0.100521  |
| 27               | 1                | 0              | 0.174158                | 4.156861  | 1.489472  |

### Structure 34c (DMSO)

Energy (Hartrees): -536.989793943

No imaginary frequencies

Standard orientation:

| Center<br>Number | Atomic<br>Number | Atomic<br>Type | Coordinates (Angstroms) |           |           |
|------------------|------------------|----------------|-------------------------|-----------|-----------|
|                  |                  |                | X                       | Y         | Z         |
| 1                | 6                | 0              | -0.768724               | -1.281817 | 0.931581  |
| 2                | 6                | 0              | -1.996985               | -1.931880 | 0.966010  |
| 3                | 6                | 0              | -2.985707               | -1.614745 | 0.036070  |
| 4                | 6                | 0              | -2.733501               | -0.644053 | -0.928390 |
| 5                | 6                | 0              | -1.501291               | 0.005684  | -0.962521 |
| 6                | 6                | 0              | -0.502159               | -0.300017 | -0.031853 |
| 7                | 1                | 0              | -0.004221               | -1.530817 | 1.658983  |
| 8                | 1                | 0              | -2.184236               | -2.686629 | 1.722072  |
| 9                | 1                | 0              | -3.943271               | -2.122413 | 0.063146  |
| 10               | 1                | 0              | -3.493527               | -0.394105 | -1.660489 |
| 11               | 1                | 0              | -1.309357               | 0.751936  | -1.727478 |
| 12               | 6                | 0              | 0.804310                | 0.404371  | -0.049474 |
| 13               | 6                | 0              | 0.895831                | 1.766536  | -0.000101 |
| 14               | 6                | 0              | 2.052990                | -0.337058 | -0.100021 |

|    |   |   |           |           |           |
|----|---|---|-----------|-----------|-----------|
| 15 | 1 | 0 | 1.884575  | 2.221471  | -0.000680 |
| 16 | 1 | 0 | 2.961022  | 0.283366  | -0.067993 |
| 17 | 7 | 0 | 2.143004  | -1.607299 | -0.183556 |
| 18 | 7 | 0 | -0.117659 | 2.654194  | 0.040566  |
| 19 | 1 | 0 | -1.057550 | 2.295570  | 0.153087  |
| 20 | 6 | 0 | 3.478731  | -2.174099 | -0.222016 |
| 21 | 1 | 0 | 3.612714  | -2.738086 | -1.150071 |
| 22 | 1 | 0 | 4.271089  | -1.416976 | -0.154089 |
| 23 | 1 | 0 | 3.602325  | -2.883821 | 0.601427  |
| 24 | 6 | 0 | 0.094466  | 4.048984  | 0.387869  |
| 25 | 1 | 0 | 1.055224  | 4.375952  | -0.011509 |
| 26 | 1 | 0 | -0.691140 | 4.657867  | -0.059312 |
| 27 | 1 | 0 | 0.091164  | 4.206988  | 1.470909  |

### Structure 34c (C<sub>2</sub>H<sub>5</sub>OH)

Energy (Hartrees): -536.992902126  
No imaginary frequencies

Standard orientation:

| Center<br>Number | Atomic<br>Number | Atomic<br>Type | Coordinates (Angstroms) |           |           |
|------------------|------------------|----------------|-------------------------|-----------|-----------|
|                  |                  |                | X                       | Y         | Z         |
| 1                | 6                | 0              | -0.812583               | -1.234159 | 0.963382  |
| 2                | 6                | 0              | -2.054137               | -1.858859 | 0.993210  |
| 3                | 6                | 0              | -3.015945               | -1.554615 | 0.031440  |
| 4                | 6                | 0              | -2.724199               | -0.623065 | -0.960090 |
| 5                | 6                | 0              | -1.479038               | 0.001612  | -0.988901 |
| 6                | 6                | 0              | -0.506884               | -0.291881 | -0.026682 |
| 7                | 1                | 0              | -0.068021               | -1.472607 | 1.715093  |
| 8                | 1                | 0              | -2.272861               | -2.583299 | 1.770259  |
| 9                | 1                | 0              | -3.983974               | -2.042508 | 0.054702  |
| 10               | 1                | 0              | -3.463120               | -0.384968 | -1.717491 |
| 11               | 1                | 0              | -1.254648               | 0.717560  | -1.773774 |
| 12               | 6                | 0              | 0.813576                | 0.387260  | -0.039038 |
| 13               | 6                | 0              | 0.927750                | 1.746795  | 0.001780  |
| 14               | 6                | 0              | 2.048305                | -0.376817 | -0.086572 |
| 15               | 1                | 0              | 1.923532                | 2.186117  | 0.006504  |
| 16               | 1                | 0              | 2.966514                | 0.227880  | -0.047493 |
| 17               | 7                | 0              | 2.117578                | -1.647820 | -0.180138 |
| 18               | 7                | 0              | -0.073520               | 2.651597  | 0.022438  |
| 19               | 1                | 0              | -1.018111               | 2.305274  | 0.134561  |
| 20               | 6                | 0              | 3.446316                | -2.231443 | -0.223669 |
| 21               | 1                | 0              | 3.576062                | -2.781430 | -1.160507 |
| 22               | 1                | 0              | 4.248438                | -1.486546 | -0.141036 |
| 23               | 1                | 0              | 3.558853                | -2.956705 | 0.587433  |
| 24               | 6                | 0              | 0.159150                | 4.040327  | 0.382373  |
| 25               | 1                | 0              | 1.120384                | 4.360527  | -0.021704 |
| 26               | 1                | 0              | -0.621541               | 4.663988  | -0.052862 |
| 27               | 1                | 0              | 0.166219                | 4.189348  | 1.466835  |

### Structure 34d (vacuum)

Energy (Hartrees): -536.965518265  
No imaginary frequencies

Standard orientation:

| Center<br>Number | Atomic<br>Number | Atomic<br>Type | Coordinates (Angstroms) |           |           |
|------------------|------------------|----------------|-------------------------|-----------|-----------|
|                  |                  |                | X                       | Y         | Z         |
| 1                | 6                | 0              | -1.675753               | 0.555569  | 0.772758  |
| 2                | 6                | 0              | -3.041991               | 0.315537  | 0.819279  |
| 3                | 6                | 0              | -3.602486               | -0.725620 | 0.082999  |
| 4                | 6                | 0              | -2.781533               | -1.519610 | -0.708178 |
| 5                | 6                | 0              | -1.412740               | -1.274580 | -0.759508 |

|    |   |   |           |           |           |
|----|---|---|-----------|-----------|-----------|
| 6  | 6 | 0 | -0.834559 | -0.246160 | -0.008495 |
| 7  | 1 | 0 | -1.249389 | 1.369925  | 1.343529  |
| 8  | 1 | 0 | -3.674638 | 0.944427  | 1.435381  |
| 9  | 1 | 0 | -4.669998 | -0.907950 | 0.118686  |
| 10 | 1 | 0 | -3.206820 | -2.320602 | -1.301921 |
| 11 | 1 | 0 | -0.785204 | -1.873333 | -1.410972 |
| 12 | 6 | 0 | 0.634426  | -0.039887 | -0.020426 |
| 13 | 6 | 0 | 1.445758  | -1.127836 | 0.025596  |
| 14 | 6 | 0 | 1.200491  | 1.307205  | -0.077287 |
| 15 | 1 | 0 | 2.287966  | 1.385702  | 0.086976  |
| 16 | 1 | 0 | 3.301859  | -0.320993 | -0.230875 |
| 17 | 1 | 0 | 0.988883  | -2.104908 | 0.165913  |
| 18 | 7 | 0 | 0.522682  | 2.360420  | -0.280668 |
| 19 | 7 | 0 | 2.804353  | -1.191573 | -0.131234 |
| 20 | 6 | 0 | 1.229157  | 3.622077  | -0.290184 |
| 21 | 1 | 0 | 2.309562  | 3.520222  | -0.112398 |
| 22 | 1 | 0 | 1.073420  | 4.112111  | -1.254563 |
| 23 | 1 | 0 | 0.806468  | 4.280602  | 0.473068  |
| 24 | 6 | 0 | 3.553254  | -2.285892 | 0.459119  |
| 25 | 1 | 0 | 3.034003  | -3.223342 | 0.251551  |
| 26 | 1 | 0 | 4.540393  | -2.340440 | 0.000539  |
| 27 | 1 | 0 | 3.670091  | -2.188166 | 1.544361  |

### Structure 34d (CHCl<sub>3</sub>)

Energy (Hartrees): -536.986954984

No imaginary frequencies

Standard orientation:

| Center<br>Number | Atomic<br>Number | Atomic<br>Type | Coordinates (Angstroms) |           |           |
|------------------|------------------|----------------|-------------------------|-----------|-----------|
|                  |                  |                | X                       | Y         | Z         |
| 1                | 6                | 0              | -1.693382               | 0.561730  | 0.765938  |
| 2                | 6                | 0              | -3.061310               | 0.321837  | 0.794642  |
| 3                | 6                | 0              | -3.610731               | -0.729153 | 0.062153  |
| 4                | 6                | 0              | -2.774468               | -1.533756 | -0.703919 |
| 5                | 6                | 0              | -1.404574               | -1.287047 | -0.739644 |
| 6                | 6                | 0              | -0.835773               | -0.245279 | 0.004177  |
| 7                | 1                | 0              | -1.278856               | 1.378633  | 1.343494  |
| 8                | 1                | 0              | -3.702779               | 0.957054  | 1.395829  |
| 9                | 1                | 0              | -4.678898               | -0.912487 | 0.083499  |
| 10               | 1                | 0              | -3.188868               | -2.345790 | -1.291411 |
| 11               | 1                | 0              | -0.768235               | -1.899959 | -1.369655 |
| 12               | 6                | 0              | 0.631831                | -0.028821 | 0.006632  |
| 13               | 6                | 0              | 1.452636                | -1.118680 | 0.058395  |
| 14               | 6                | 0              | 1.194521                | 1.316444  | -0.048339 |
| 15               | 1                | 0              | 2.270728                | 1.399324  | 0.165634  |
| 16               | 1                | 0              | 3.314554                | -0.311294 | -0.184663 |
| 17               | 1                | 0              | 0.999769                | -2.098302 | 0.194790  |
| 18               | 7                | 0              | 0.528435                | 2.369111  | -0.310356 |
| 19               | 7                | 0              | 2.801151                | -1.173664 | -0.077167 |
| 20               | 6                | 0              | 1.244744                | 3.628421  | -0.302167 |
| 21               | 1                | 0              | 2.315678                | 3.518654  | -0.083772 |
| 22               | 1                | 0              | 1.130444                | 4.116596  | -1.273954 |
| 23               | 1                | 0              | 0.801206                | 4.296537  | 0.441820  |
| 24               | 6                | 0              | 3.558861                | -2.318337 | 0.396928  |
| 25               | 1                | 0              | 3.003675                | -3.231185 | 0.174066  |
| 26               | 1                | 0              | 4.513645                | -2.361873 | -0.126756 |
| 27               | 1                | 0              | 3.746700                | -2.278196 | 1.474965  |

### Structure 34d (DMSO)

Energy (Hartrees): -536.985478833  
No imaginary frequencies

Standard orientation:

| Center<br>Number | Atomic<br>Number | Atomic<br>Type | Coordinates (Angstroms) |           |           |
|------------------|------------------|----------------|-------------------------|-----------|-----------|
|                  |                  |                | X                       | Y         | Z         |
| 1                | 6                | 0              | -1.700475               | 0.563867  | 0.756941  |
| 2                | 6                | 0              | -3.068208               | 0.318288  | 0.779610  |
| 3                | 6                | 0              | -3.608645               | -0.742673 | 0.053822  |
| 4                | 6                | 0              | -2.762566               | -1.551708 | -0.697671 |
| 5                | 6                | 0              | -1.393175               | -1.298955 | -0.728233 |
| 6                | 6                | 0              | -0.832578               | -0.245415 | 0.007115  |
| 7                | 1                | 0              | -1.293959               | 1.384948  | 1.335033  |
| 8                | 1                | 0              | -3.715700               | 0.954267  | 1.373818  |
| 9                | 1                | 0              | -4.675939               | -0.931912 | 0.071387  |
| 10               | 1                | 0              | -3.168485               | -2.374348 | -1.276463 |
| 11               | 1                | 0              | -0.750826               | -1.920648 | -1.343567 |
| 12               | 6                | 0              | 0.632888                | -0.020124 | 0.017244  |
| 13               | 6                | 0              | 1.460183                | -1.110600 | 0.073237  |
| 14               | 6                | 0              | 1.188353                | 1.325660  | -0.039963 |
| 15               | 1                | 0              | 2.262561                | 1.416454  | 0.175158  |
| 16               | 1                | 0              | 3.323456                | -0.299232 | -0.149222 |
| 17               | 1                | 0              | 1.008079                | -2.091934 | 0.201961  |
| 18               | 7                | 0              | 0.517163                | 2.375318  | -0.312964 |
| 19               | 7                | 0              | 2.803574                | -1.158620 | -0.041078 |
| 20               | 6                | 0              | 1.231297                | 3.637906  | -0.309227 |
| 21               | 1                | 0              | 2.301296                | 3.528987  | -0.089510 |
| 22               | 1                | 0              | 1.118642                | 4.123026  | -1.283123 |
| 23               | 1                | 0              | 0.786986                | 4.308805  | 0.432259  |
| 24               | 6                | 0              | 3.565358                | -2.327711 | 0.363607  |
| 25               | 1                | 0              | 2.992572                | -3.226563 | 0.130069  |
| 26               | 1                | 0              | 4.501620                | -2.358160 | -0.193152 |
| 27               | 1                | 0              | 3.789950                | -2.321790 | 1.434760  |

### Structure 34d (C<sub>2</sub>H<sub>5</sub>OH)

Energy (Hartrees): -536.988583101  
No imaginary frequencies

Standard orientation:

| Center<br>Number | Atomic<br>Number | Atomic<br>Type | Coordinates (Angstroms) |           |           |
|------------------|------------------|----------------|-------------------------|-----------|-----------|
|                  |                  |                | X                       | Y         | Z         |
| 1                | 6                | 0              | -1.693727               | 0.552442  | 0.786933  |
| 2                | 6                | 0              | -3.062972               | 0.316177  | 0.809422  |
| 3                | 6                | 0              | -3.614205               | -0.718924 | 0.054882  |
| 4                | 6                | 0              | -2.778234               | -1.511098 | -0.725253 |
| 5                | 6                | 0              | -1.407165               | -1.266935 | -0.755490 |
| 6                | 6                | 0              | -0.836452               | -0.239532 | 0.007603  |
| 7                | 1                | 0              | -1.277745               | 1.351514  | 1.389008  |
| 8                | 1                | 0              | -3.703353               | 0.938890  | 1.425196  |
| 9                | 1                | 0              | -4.682859               | -0.901093 | 0.072233  |
| 10               | 1                | 0              | -3.193381               | -2.312801 | -1.326606 |
| 11               | 1                | 0              | -0.771304               | -1.873872 | -1.392125 |
| 12               | 6                | 0              | 0.631062                | -0.024010 | 0.015115  |
| 13               | 6                | 0              | 1.448650                | -1.120238 | 0.064596  |
| 14               | 6                | 0              | 1.197443                | 1.317698  | -0.040530 |
| 15               | 1                | 0              | 2.270634                | 1.398112  | 0.183029  |
| 16               | 1                | 0              | 3.318668                | -0.322059 | -0.147159 |
| 17               | 1                | 0              | 0.989086                | -2.098335 | 0.191718  |
| 18               | 7                | 0              | 0.539871                | 2.374224  | -0.321022 |
| 19               | 7                | 0              | 2.793495                | -1.180720 | -0.059060 |
| 20               | 6                | 0              | 1.272103                | 3.627127  | -0.309138 |
| 21               | 1                | 0              | 2.339788                | 3.502832  | -0.087627 |
| 22               | 1                | 0              | 1.168276                | 4.119601  | -1.280030 |
| 23               | 1                | 0              | 0.836016                | 4.300580  | 0.434727  |



|    |   |   |          |           |           |
|----|---|---|----------|-----------|-----------|
| 24 | 6 | 0 | 3.539606 | -2.347710 | 0.382430  |
| 25 | 1 | 0 | 2.971602 | -3.247618 | 0.141137  |
| 26 | 1 | 0 | 4.491698 | -2.388188 | -0.146095 |
| 27 | 1 | 0 | 3.732661 | -2.332068 | 1.459755  |

### Structure 34e (vacuum)

Energy (Hartrees): -536.962557550  
No imaginary frequencies

Standard orientation:

| Center<br>Number | Atomic<br>Number | Atomic<br>Type | Coordinates (Angstroms) |           |           |
|------------------|------------------|----------------|-------------------------|-----------|-----------|
|                  |                  |                | X                       | Y         | Z         |
| 1                | 6                | 0              | 1.622386                | 0.817097  | -0.662363 |
| 2                | 6                | 0              | 3.007594                | 0.859814  | -0.596142 |
| 3                | 6                | 0              | 3.714755                | -0.132361 | 0.080088  |
| 4                | 6                | 0              | 3.018934                | -1.164255 | 0.696478  |
| 5                | 6                | 0              | 1.628816                | -1.203242 | 0.633878  |
| 6                | 6                | 0              | 0.908025                | -0.225642 | -0.059037 |
| 7                | 1                | 0              | 1.082382                | 1.595759  | -1.184919 |
| 8                | 1                | 0              | 3.540679                | 1.671996  | -1.077248 |
| 9                | 1                | 0              | 4.796426                | -0.093604 | 0.132439  |
| 10               | 1                | 0              | 3.554159                | -1.933741 | 1.241066  |
| 11               | 1                | 0              | 1.090771                | -1.990827 | 1.150523  |
| 12               | 6                | 0              | -0.568577               | -0.324827 | -0.183562 |
| 13               | 6                | 0              | -1.099825               | -1.543020 | -0.468852 |
| 14               | 6                | 0              | -1.400135               | 0.877936  | -0.085059 |
| 15               | 1                | 0              | -2.427061               | 0.784924  | -0.462046 |
| 16               | 1                | 0              | -2.557012               | -2.892315 | -0.775008 |
| 17               | 1                | 0              | -0.408506               | -2.340857 | -0.727205 |
| 18               | 7                | 0              | -0.978531               | 1.994198  | 0.348355  |
| 19               | 7                | 0              | -2.410097               | -1.941749 | -0.484029 |
| 20               | 6                | 0              | -1.904337               | 3.105621  | 0.334633  |
| 21               | 1                | 0              | -2.008162               | 3.499587  | 1.348792  |
| 22               | 1                | 0              | -1.493629               | 3.912497  | -0.278288 |
| 23               | 1                | 0              | -2.900172               | 2.841111  | -0.049362 |
| 24               | 6                | 0              | -3.475561               | -1.361171 | 0.314533  |
| 25               | 1                | 0              | -3.049273               | -0.865308 | 1.190646  |
| 26               | 1                | 0              | -4.073197               | -0.634834 | -0.241623 |
| 27               | 1                | 0              | -4.139462               | -2.157236 | 0.654391  |

### Structure 34e (CHCl<sub>3</sub>)

Energy (Hartrees): -536.983961393  
No imaginary frequencies

Standard orientation:

| Center<br>Number | Atomic<br>Number | Atomic<br>Type | Coordinates (Angstroms) |           |           |
|------------------|------------------|----------------|-------------------------|-----------|-----------|
|                  |                  |                | X                       | Y         | Z         |
| 1                | 6                | 0              | 1.620549                | 0.782087  | -0.705997 |
| 2                | 6                | 0              | 3.007720                | 0.823762  | -0.662159 |
| 3                | 6                | 0              | 3.721996                | -0.141658 | 0.046621  |
| 4                | 6                | 0              | 3.029838                | -1.144509 | 0.715524  |
| 5                | 6                | 0              | 1.637733                | -1.181293 | 0.675510  |
| 6                | 6                | 0              | 0.907449                | -0.228991 | -0.045235 |
| 7                | 1                | 0              | 1.077087                | 1.536886  | -1.260957 |
| 8                | 1                | 0              | 3.536106                | 1.611991  | -1.187438 |
| 9                | 1                | 0              | 4.804932                | -0.106084 | 0.080899  |
| 10               | 1                | 0              | 3.570461                | -1.895216 | 1.281503  |
| 11               | 1                | 0              | 1.107363                | -1.951499 | 1.225890  |
| 12               | 6                | 0              | -0.573924               | -0.320487 | -0.144422 |
| 13               | 6                | 0              | -1.106929               | -1.555228 | -0.391904 |

|    |   |   |           |           |           |
|----|---|---|-----------|-----------|-----------|
| 14 | 6 | 0 | -1.389282 | 0.888784  | -0.048415 |
| 15 | 1 | 0 | -2.426244 | 0.803437  | -0.389218 |
| 16 | 1 | 0 | -2.516562 | -2.952240 | -0.661822 |
| 17 | 1 | 0 | -0.406109 | -2.355033 | -0.616569 |
| 18 | 7 | 0 | -0.951701 | 2.012905  | 0.361226  |
| 19 | 7 | 0 | -2.391846 | -1.986471 | -0.404976 |
| 20 | 6 | 0 | -1.879058 | 3.126340  | 0.351001  |
| 21 | 1 | 0 | -1.958005 | 3.543649  | 1.358848  |
| 22 | 1 | 0 | -1.489588 | 3.921394  | -0.291744 |
| 23 | 1 | 0 | -2.884058 | 2.852383  | 0.001771  |
| 24 | 6 | 0 | -3.549712 | -1.329084 | 0.171151  |
| 25 | 1 | 0 | -3.262631 | -0.784619 | 1.074825  |
| 26 | 1 | 0 | -4.029219 | -0.634375 | -0.523306 |
| 27 | 1 | 0 | -4.276970 | -2.094037 | 0.443518  |

### Structure 34e (DMSO)

Energy (Hartrees): -536.982632561

No imaginary frequencies

Standard orientation:

| Center<br>Number | Atomic<br>Number | Atomic<br>Type | Coordinates (Angstroms) |           |           |
|------------------|------------------|----------------|-------------------------|-----------|-----------|
|                  |                  |                | X                       | Y         | Z         |
| 1                | 6                | 0              | 1.619982                | 0.765870  | -0.728036 |
| 2                | 6                | 0              | 3.007643                | 0.808933  | -0.682367 |
| 3                | 6                | 0              | 3.720679                | -0.143992 | 0.045432  |
| 4                | 6                | 0              | 3.026624                | -1.136442 | 0.728618  |
| 5                | 6                | 0              | 1.633986                | -1.174077 | 0.687207  |
| 6                | 6                | 0              | 0.904110                | -0.232616 | -0.049273 |
| 7                | 1                | 0              | 1.078716                | 1.508468  | -1.302363 |
| 8                | 1                | 0              | 3.537350                | 1.586855  | -1.221766 |
| 9                | 1                | 0              | 4.803673                | -0.108245 | 0.080730  |
| 10               | 1                | 0              | 3.566014                | -1.879660 | 1.305726  |
| 11               | 1                | 0              | 1.104158                | -1.939841 | 1.244440  |
| 12               | 6                | 0              | -0.577772               | -0.319905 | -0.144060 |
| 13               | 6                | 0              | -1.112917               | -1.561075 | -0.375612 |
| 14               | 6                | 0              | -1.385542               | 0.892175  | -0.046495 |
| 15               | 1                | 0              | -2.422564               | 0.817514  | -0.386859 |
| 16               | 1                | 0              | -2.514780               | -2.965162 | -0.621829 |
| 17               | 1                | 0              | -0.411172               | -2.363793 | -0.587496 |
| 18               | 7                | 0              | -0.941026               | 2.013644  | 0.370593  |
| 19               | 7                | 0              | -2.390482               | -1.994050 | -0.380758 |
| 20               | 6                | 0              | -1.863457               | 3.133368  | 0.360411  |
| 21               | 1                | 0              | -1.941806               | 3.552064  | 1.368019  |
| 22               | 1                | 0              | -1.471591               | 3.926340  | -0.283907 |
| 23               | 1                | 0              | -2.868646               | 2.861976  | 0.011779  |
| 24               | 6                | 0              | -3.561314               | -1.313146 | 0.139476  |
| 25               | 1                | 0              | -3.301677               | -0.754270 | 1.042812  |
| 26               | 1                | 0              | -4.004591               | -0.626619 | -0.586010 |
| 27               | 1                | 0              | -4.304660               | -2.067341 | 0.396072  |

### Structure 34e (C<sub>2</sub>H<sub>5</sub>OH)

Energy (Hartrees): -536.985780102

No imaginary frequencies

Standard orientation:

| Center<br>Number | Atomic<br>Number | Atomic<br>Type | Coordinates (Angstroms) |           |           |
|------------------|------------------|----------------|-------------------------|-----------|-----------|
|                  |                  |                | X                       | Y         | Z         |
| 1                | 6                | 0              | 1.622768                | 0.756252  | -0.747845 |
| 2                | 6                | 0              | 3.010260                | 0.802396  | -0.700700 |
| 3                | 6                | 0              | 3.723004                | -0.135228 | 0.046934  |
| 4                | 6                | 0              | 3.029482                | -1.115083 | 0.748454  |

|    |   |   |           |           |           |
|----|---|---|-----------|-----------|-----------|
| 5  | 6 | 0 | 1.636967  | -1.155465 | 0.705462  |
| 6  | 6 | 0 | 0.907860  | -0.229282 | -0.050342 |
| 7  | 1 | 0 | 1.081007  | 1.485545  | -1.338950 |
| 8  | 1 | 0 | 3.540122  | 1.570336  | -1.254182 |
| 9  | 1 | 0 | 4.806031  | -0.097489 | 0.083155  |
| 10 | 1 | 0 | 3.569345  | -1.845896 | 1.340931  |
| 11 | 1 | 0 | 1.106466  | -1.910632 | 1.276494  |
| 12 | 6 | 0 | -0.573851 | -0.320057 | -0.147069 |
| 13 | 6 | 0 | -1.105469 | -1.562179 | -0.375816 |
| 14 | 6 | 0 | -1.385632 | 0.889201  | -0.050369 |
| 15 | 1 | 0 | -2.418731 | 0.811097  | -0.401152 |
| 16 | 1 | 0 | -2.504187 | -2.971896 | -0.615966 |
| 17 | 1 | 0 | -0.401731 | -2.364315 | -0.583257 |
| 18 | 7 | 0 | -0.951957 | 2.010907  | 0.377979  |
| 19 | 7 | 0 | -2.383830 | -1.997729 | -0.385993 |
| 20 | 6 | 0 | -1.888227 | 3.120187  | 0.366477  |
| 21 | 1 | 0 | -1.980077 | 3.532328  | 1.375504  |
| 22 | 1 | 0 | -1.501737 | 3.922442  | -0.269210 |
| 23 | 1 | 0 | -2.887187 | 2.839544  | 0.008285  |
| 24 | 6 | 0 | -3.554698 | -1.317534 | 0.136304  |
| 25 | 1 | 0 | -3.295032 | -0.757587 | 1.039052  |
| 26 | 1 | 0 | -4.001388 | -0.633104 | -0.589050 |
| 27 | 1 | 0 | -4.297172 | -2.071878 | 0.395509  |

### Structure 34f (vacuum)

Energy (Hartrees): -536.961735310  
 No imaginary frequencies

Standard orientation:

| Center<br>Number | Atomic<br>Number | Atomic<br>Type | Coordinates (Angstroms) |           |           |
|------------------|------------------|----------------|-------------------------|-----------|-----------|
|                  |                  |                | X                       | Y         | Z         |
| 1                | 6                | 0              | -1.722732               | 0.691749  | 0.988432  |
| 2                | 6                | 0              | -3.103807               | 0.847277  | 1.006926  |
| 3                | 6                | 0              | -3.894363               | 0.211258  | 0.054885  |
| 4                | 6                | 0              | -3.288010               | -0.573830 | -0.919931 |
| 5                | 6                | 0              | -1.904874               | -0.716840 | -0.944903 |
| 6                | 6                | 0              | -1.098551               | -0.096307 | 0.014741  |
| 7                | 1                | 0              | -1.120012               | 1.169008  | 1.753992  |
| 8                | 1                | 0              | -3.564855               | 1.457720  | 1.774940  |
| 9                | 1                | 0              | -4.971081               | 0.330257  | 0.070235  |
| 10               | 1                | 0              | -3.891410               | -1.063831 | -1.675501 |
| 11               | 1                | 0              | -1.436293               | -1.299199 | -1.731131 |
| 12               | 6                | 0              | 0.383877                | -0.259377 | 0.002125  |
| 13               | 6                | 0              | 0.873811                | -1.526285 | -0.068400 |
| 14               | 6                | 0              | 1.155174                | 0.986612  | -0.030048 |
| 15               | 1                | 0              | 0.142717                | -2.319763 | -0.202673 |
| 16               | 1                | 0              | 0.615243                | 1.871052  | 0.340688  |
| 17               | 1                | 0              | 2.216466                | -2.999235 | 0.020964  |
| 18               | 7                | 0              | 2.314866                | 1.113273  | -0.534908 |
| 19               | 7                | 0              | 2.143598                | -1.997003 | 0.050424  |
| 20               | 6                | 0              | 3.223464                | -1.317428 | 0.744992  |
| 21               | 1                | 0              | 3.722852                | -0.598349 | 0.097334  |
| 22               | 1                | 0              | 2.828240                | -0.776654 | 1.610760  |
| 23               | 1                | 0              | 3.931718                | -2.070305 | 1.090840  |
| 24               | 6                | 0              | 2.894483                | 2.440833  | -0.535866 |
| 25               | 1                | 0              | 3.156039                | 2.718345  | -1.560018 |
| 26               | 1                | 0              | 2.226438                | 3.206450  | -0.118006 |
| 27               | 1                | 0              | 3.823847                | 2.434629  | 0.041242  |

### Structure 34f (CHCl<sub>3</sub>)

Energy (Hartrees): -536.980775719  
No imaginary frequencies

Standard orientation:

| Center<br>Number | Atomic<br>Number | Atomic<br>Type | Coordinates (Angstroms) |           |           |
|------------------|------------------|----------------|-------------------------|-----------|-----------|
|                  |                  |                | X                       | Y         | Z         |
| 1                | 6                | 0              | -1.721906               | 0.728191  | 0.963648  |
| 2                | 6                | 0              | -3.104147               | 0.882719  | 0.983804  |
| 3                | 6                | 0              | -3.900246               | 0.215763  | 0.056620  |
| 4                | 6                | 0              | -3.296608               | -0.600044 | -0.895905 |
| 5                | 6                | 0              | -1.912881               | -0.743689 | -0.923103 |
| 6                | 6                | 0              | -1.099917               | -0.091513 | 0.012380  |
| 7                | 1                | 0              | -1.119259               | 1.234350  | 1.710716  |
| 8                | 1                | 0              | -3.560861               | 1.518378  | 1.734505  |
| 9                | 1                | 0              | -4.977517               | 0.334075  | 0.073761  |
| 10               | 1                | 0              | -3.902674               | -1.116241 | -1.632360 |
| 11               | 1                | 0              | -1.452664               | -1.357212 | -1.690636 |
| 12               | 6                | 0              | 0.382453                | -0.259335 | 0.000190  |
| 13               | 6                | 0              | 0.876412                | -1.528031 | -0.074987 |
| 14               | 6                | 0              | 1.166293                | 0.979007  | -0.016279 |
| 15               | 1                | 0              | 0.156303                | -2.328289 | -0.226281 |
| 16               | 1                | 0              | 0.676211                | 1.855011  | 0.431876  |
| 17               | 1                | 0              | 2.224861                | -2.992505 | 0.032382  |
| 18               | 7                | 0              | 2.296679                | 1.106690  | -0.588110 |
| 19               | 7                | 0              | 2.144416                | -1.988642 | 0.062516  |
| 20               | 6                | 0              | 3.212124                | -1.306286 | 0.770951  |
| 21               | 1                | 0              | 3.732619                | -0.592502 | 0.132528  |
| 22               | 1                | 0              | 2.807526                | -0.760658 | 1.629742  |
| 23               | 1                | 0              | 3.913169                | -2.059384 | 1.130422  |
| 24               | 6                | 0              | 2.916574                | 2.417250  | -0.546049 |
| 25               | 1                | 0              | 3.150134                | 2.739959  | -1.564176 |
| 26               | 1                | 0              | 2.289121                | 3.179282  | -0.065146 |
| 27               | 1                | 0              | 3.866463                | 2.355202  | -0.005795 |

### Structure 34f (DMSO)

Energy (Hartrees): -536.978275462  
No imaginary frequencies

Standard orientation:

| Center<br>Number | Atomic<br>Number | Atomic<br>Type | Coordinates (Angstroms) |           |           |
|------------------|------------------|----------------|-------------------------|-----------|-----------|
|                  |                  |                | X                       | Y         | Z         |
| 1                | 6                | 0              | -1.723356               | 0.772712  | 0.930332  |
| 2                | 6                | 0              | -3.106026               | 0.929539  | 0.940360  |
| 3                | 6                | 0              | -3.902667               | 0.219580  | 0.045581  |
| 4                | 6                | 0              | -3.298140               | -0.644020 | -0.864076 |
| 5                | 6                | 0              | -1.914594               | -0.791611 | -0.881912 |
| 6                | 6                | 0              | -1.100327               | -0.094435 | 0.021329  |
| 7                | 1                | 0              | -1.123887               | 1.316844  | 1.652634  |
| 8                | 1                | 0              | -3.561593               | 1.603267  | 1.658062  |
| 9                | 1                | 0              | -4.979778               | 0.341054  | 0.054634  |
| 10               | 1                | 0              | -3.903786               | -1.196518 | -1.574281 |
| 11               | 1                | 0              | -1.458522               | -1.448180 | -1.615698 |
| 12               | 6                | 0              | 0.381014                | -0.263948 | 0.014225  |
| 13               | 6                | 0              | 0.881373                | -1.531301 | -0.064660 |
| 14               | 6                | 0              | 1.171135                | 0.971625  | 0.003785  |
| 15               | 1                | 0              | 0.169464                | -2.338692 | -0.216106 |
| 16               | 1                | 0              | 0.723730                | 1.835885  | 0.513073  |
| 17               | 1                | 0              | 2.239634                | -2.984700 | 0.055087  |
| 18               | 7                | 0              | 2.269841                | 1.104935  | -0.627154 |
| 19               | 7                | 0              | 2.152789                | -1.980011 | 0.071825  |
| 20               | 6                | 0              | 3.216374                | -1.284190 | 0.773591  |
| 21               | 1                | 0              | 3.737526                | -0.575046 | 0.129321  |
| 22               | 1                | 0              | 2.808988                | -0.729780 | 1.625610  |
| 23               | 1                | 0              | 3.920037                | -2.030402 | 1.141236  |

|    |   |   |          |          |           |
|----|---|---|----------|----------|-----------|
| 24 | 6 | 0 | 2.918526 | 2.402100 | -0.562750 |
| 25 | 1 | 0 | 3.084301 | 2.776093 | -1.576858 |
| 26 | 1 | 0 | 2.342594 | 3.145657 | 0.002747  |
| 27 | 1 | 0 | 3.903008 | 2.293741 | -0.096989 |

### Structure 34f (C<sub>2</sub>H<sub>5</sub>OH)

Energy (Hartrees): -536.981312625

No imaginary frequencies

Standard orientation:

| Center<br>Number | Atomic<br>Number | Atomic<br>Type | Coordinates (Angstroms) |           |           |
|------------------|------------------|----------------|-------------------------|-----------|-----------|
|                  |                  |                | X                       | Y         | Z         |
| 1                | 6                | 0              | -1.719979               | 0.752161  | 0.946091  |
| 2                | 6                | 0              | -3.102399               | 0.910147  | 0.957724  |
| 3                | 6                | 0              | -3.898460               | 0.219345  | 0.047541  |
| 4                | 6                | 0              | -3.293985               | -0.625869 | -0.879114 |
| 5                | 6                | 0              | -1.910382               | -0.774289 | -0.898412 |
| 6                | 6                | 0              | -1.097204               | -0.096748 | 0.020043  |
| 7                | 1                | 0              | -1.120802               | 1.280028  | 1.680770  |
| 8                | 1                | 0              | -3.558627               | 1.569328  | 1.688552  |
| 9                | 1                | 0              | -4.975596               | 0.341647  | 0.057908  |
| 10               | 1                | 0              | -3.899436               | -1.162821 | -1.601445 |
| 11               | 1                | 0              | -1.452847               | -1.415230 | -1.645139 |
| 12               | 6                | 0              | 0.384190                | -0.268681 | 0.011780  |
| 13               | 6                | 0              | 0.881926                | -1.535688 | -0.067225 |
| 14               | 6                | 0              | 1.173309                | 0.967891  | 0.008841  |
| 15               | 1                | 0              | 0.168104                | -2.342261 | -0.214174 |
| 16               | 1                | 0              | 0.731729                | 1.822200  | 0.539577  |
| 17               | 1                | 0              | 2.234911                | -2.991510 | 0.071721  |
| 18               | 7                | 0              | 2.261103                | 1.115796  | -0.637607 |
| 19               | 7                | 0              | 2.155342                | -1.986124 | 0.064359  |
| 20               | 6                | 0              | 3.213546                | -1.285281 | 0.770559  |
| 21               | 1                | 0              | 3.731655                | -0.571506 | 0.129199  |
| 22               | 1                | 0              | 2.802797                | -0.736718 | 1.625029  |
| 23               | 1                | 0              | 3.922979                | -2.027166 | 1.136130  |
| 24               | 6                | 0              | 2.905110                | 2.415030  | -0.554811 |
| 25               | 1                | 0              | 3.053506                | 2.813164  | -1.562281 |
| 26               | 1                | 0              | 2.335246                | 3.143220  | 0.035868  |
| 27               | 1                | 0              | 3.897242                | 2.301808  | -0.107077 |

### Structure 35a (vacuum)

Energy (Hartrees): -651.490690585

No imaginary frequencies

Standard orientation:

| Center<br>Number | Atomic<br>Number | Atomic<br>Type | Coordinates (Angstroms) |           |           |
|------------------|------------------|----------------|-------------------------|-----------|-----------|
|                  |                  |                | X                       | Y         | Z         |
| 1                | 6                | 0              | 0.916940                | -1.085126 | 0.761972  |
| 2                | 6                | 0              | 2.296251                | -1.167393 | 0.813571  |
| 3                | 6                | 0              | 3.082627                | -0.223966 | 0.148644  |
| 4                | 6                | 0              | 2.464947                | 0.792221  | -0.574768 |
| 5                | 6                | 0              | 1.072318                | 0.847224  | -0.632948 |
| 6                | 6                | 0              | 0.267108                | -0.072429 | 0.037419  |
| 7                | 1                | 0              | 0.325964                | -1.806874 | 1.315591  |
| 8                | 1                | 0              | 2.794320                | -1.947259 | 1.377014  |
| 9                | 1                | 0              | 3.044439                | 1.529537  | -1.114011 |
| 10               | 1                | 0              | 0.605568                | 1.616799  | -1.238452 |
| 11               | 6                | 0              | -1.210639               | 0.010197  | -0.003146 |
| 12               | 6                | 0              | -1.829437               | 1.223589  | 0.134776  |

|    |   |   |           |           |           |
|----|---|---|-----------|-----------|-----------|
| 13 | 6 | 0 | -1.975189 | -1.207552 | -0.189136 |
| 14 | 1 | 0 | -1.219906 | 2.106756  | 0.316802  |
| 15 | 1 | 0 | -1.382519 | -2.126091 | -0.309214 |
| 16 | 1 | 0 | -3.725216 | 0.610001  | -0.039918 |
| 17 | 7 | 0 | -3.254475 | -1.262901 | -0.239651 |
| 18 | 7 | 0 | -3.152803 | 1.447167  | 0.068835  |
| 19 | 6 | 0 | -3.860553 | -2.562349 | -0.445274 |
| 20 | 1 | 0 | -4.478896 | -2.541770 | -1.346498 |
| 21 | 1 | 0 | -3.120417 | -3.367207 | -0.545671 |
| 22 | 1 | 0 | -4.520886 | -2.796480 | 0.394114  |
| 23 | 6 | 0 | -3.752631 | 2.715268  | 0.417688  |
| 24 | 1 | 0 | -3.023872 | 3.514151  | 0.269873  |
| 25 | 1 | 0 | -4.609563 | 2.914472  | -0.227141 |
| 26 | 1 | 0 | -4.086689 | 2.741518  | 1.460137  |
| 27 | 8 | 0 | 4.430362  | -0.381858 | 0.263279  |
| 28 | 6 | 0 | 5.254209  | 0.555290  | -0.393909 |
| 29 | 1 | 0 | 6.279437  | 0.261505  | -0.178962 |
| 30 | 1 | 0 | 5.090246  | 0.537368  | -1.476339 |
| 31 | 1 | 0 | 5.080333  | 1.568726  | -0.017170 |

### Structure 35a (CHCl<sub>3</sub>)

Energy (Hartrees): -651.508752314  
No imaginary frequencies

Standard orientation:

| Center<br>Number | Atomic<br>Number | Atomic<br>Type | Coordinates (Angstroms) |           |           |
|------------------|------------------|----------------|-------------------------|-----------|-----------|
|                  |                  |                | X                       | Y         | Z         |
| 1                | 6                | 0              | 0.917832                | -1.122150 | 0.722020  |
| 2                | 6                | 0              | 2.299037                | -1.205095 | 0.765807  |
| 3                | 6                | 0              | 3.084096                | -0.232768 | 0.140416  |
| 4                | 6                | 0              | 2.462426                | 0.813916  | -0.536679 |
| 5                | 6                | 0              | 1.069352                | 0.870596  | -0.587810 |
| 6                | 6                | 0              | 0.263586                | -0.078682 | 0.044192  |
| 7                | 1                | 0              | 0.332347                | -1.872459 | 1.243038  |
| 8                | 1                | 0              | 2.794005                | -2.011861 | 1.294935  |
| 9                | 1                | 0              | 3.040310                | 1.575112  | -1.044613 |
| 10               | 1                | 0              | 0.604106                | 1.670625  | -1.154312 |
| 11               | 6                | 0              | -1.215583               | 0.004442  | 0.008540  |
| 12               | 6                | 0              | -1.830548               | 1.225436  | 0.144048  |
| 13               | 6                | 0              | -1.979532               | -1.211746 | -0.181915 |
| 14               | 1                | 0              | -1.219528               | 2.109025  | 0.316855  |
| 15               | 1                | 0              | -1.389402               | -2.128714 | -0.317949 |
| 16               | 1                | 0              | -3.737585               | 0.632494  | -0.019519 |
| 17               | 7                | 0              | -3.261256               | -1.270237 | -0.221964 |
| 18               | 7                | 0              | -3.148641               | 1.456388  | 0.087840  |
| 19               | 6                | 0              | -3.862054               | -2.571624 | -0.442386 |
| 20               | 1                | 0              | -4.473123               | -2.547936 | -1.349304 |
| 21               | 1                | 0              | -3.119379               | -3.373838 | -0.541155 |
| 22               | 1                | 0              | -4.530485               | -2.814208 | 0.388757  |
| 23               | 6                | 0              | -3.741266               | 2.744840  | 0.381292  |
| 24               | 1                | 0              | -2.989737               | 3.526063  | 0.257887  |
| 25               | 1                | 0              | -4.562365               | 2.943165  | -0.309076 |
| 26               | 1                | 0              | -4.126019               | 2.789455  | 1.404630  |
| 27               | 8                | 0              | 4.432180                | -0.390816 | 0.243469  |
| 28               | 6                | 0              | 5.255103                | 0.576411  | -0.384534 |
| 29               | 1                | 0              | 6.281977                | 0.273781  | -0.187248 |
| 30               | 1                | 0              | 5.085476                | 0.598451  | -1.465332 |
| 31               | 1                | 0              | 5.086547                | 1.572858  | 0.035578  |

### Structure 35a (DMSO)

Energy (Hartrees): -651.505613321  
No imaginary frequencies

Standard orientation:

| Center<br>Number | Atomic<br>Number | Atomic<br>Type | Coordinates (Angstroms) |           |           |
|------------------|------------------|----------------|-------------------------|-----------|-----------|
|                  |                  |                | X                       | Y         | Z         |
| 1                | 6                | 0              | 0.918570                | -1.140934 | 0.700033  |
| 2                | 6                | 0              | 2.300662                | -1.224515 | 0.739270  |
| 3                | 6                | 0              | 3.086291                | -0.236840 | 0.137717  |
| 4                | 6                | 0              | 2.462040                | 0.828132  | -0.510042 |
| 5                | 6                | 0              | 1.068801                | 0.885988  | -0.557449 |
| 6                | 6                | 0              | 0.262753                | -0.080725 | 0.049494  |
| 7                | 1                | 0              | 0.336038                | -1.906835 | 1.201534  |
| 8                | 1                | 0              | 2.792988                | -2.046410 | 1.247551  |
| 9                | 1                | 0              | 3.037892                | 1.604360  | -0.997441 |
| 10               | 1                | 0              | 0.605384                | 1.704743  | -1.098335 |
| 11               | 6                | 0              | -1.216893               | 0.001804  | 0.015608  |
| 12               | 6                | 0              | -1.831352               | 1.226333  | 0.146786  |
| 13               | 6                | 0              | -1.979912               | -1.214711 | -0.173977 |
| 14               | 1                | 0              | -1.219858               | 2.111218  | 0.311105  |
| 15               | 1                | 0              | -1.391729               | -2.132618 | -0.309541 |
| 16               | 1                | 0              | -3.743188               | 0.640172  | -0.012077 |
| 17               | 7                | 0              | -3.262680               | -1.272701 | -0.215158 |
| 18               | 7                | 0              | -3.147375               | 1.458718  | 0.094535  |
| 19               | 6                | 0              | -3.862155               | -2.574836 | -0.442103 |
| 20               | 1                | 0              | -4.473971               | -2.547246 | -1.348589 |
| 21               | 1                | 0              | -3.117984               | -3.374756 | -0.545521 |
| 22               | 1                | 0              | -4.530511               | -2.823028 | 0.387623  |
| 23               | 6                | 0              | -3.736422               | 2.756083  | 0.361353  |
| 24               | 1                | 0              | -2.978345               | 3.530120  | 0.235649  |
| 25               | 1                | 0              | -4.548864               | 2.945906  | -0.341326 |
| 26               | 1                | 0              | -4.133020               | 2.814805  | 1.379037  |
| 27               | 8                | 0              | 4.432637                | -0.396839 | 0.231596  |
| 28               | 6                | 0              | 5.250838                | 0.585692  | -0.384716 |
| 29               | 1                | 0              | 6.279685                | 0.280339  | -0.202983 |
| 30               | 1                | 0              | 5.070840                | 0.629808  | -1.462922 |
| 31               | 1                | 0              | 5.084596                | 1.573182  | 0.055992  |

### Structure 35a (C<sub>2</sub>H<sub>5</sub>OH)

Energy (Hartrees): -651.508871672  
No imaginary frequencies

Standard orientation:

| Center<br>Number | Atomic<br>Number | Atomic<br>Type | Coordinates (Angstroms) |           |           |
|------------------|------------------|----------------|-------------------------|-----------|-----------|
|                  |                  |                | X                       | Y         | Z         |
| 1                | 6                | 0              | 0.913063                | -1.134856 | 0.705808  |
| 2                | 6                | 0              | 2.295153                | -1.218075 | 0.750544  |
| 3                | 6                | 0              | 3.080014                | -0.236985 | 0.139912  |
| 4                | 6                | 0              | 2.461013                | 0.819976  | -0.523392 |
| 5                | 6                | 0              | 1.068103                | 0.877416  | -0.575713 |
| 6                | 6                | 0              | 0.260491                | -0.081922 | 0.041096  |
| 7                | 1                | 0              | 0.328484                | -1.893984 | 1.215234  |
| 8                | 1                | 0              | 2.786791                | -2.033656 | 1.270015  |
| 9                | 1                | 0              | 3.039756                | 1.589489  | -1.017967 |
| 10               | 1                | 0              | 0.605638                | 1.688952  | -1.128270 |
| 11               | 6                | 0              | -1.218867               | 0.002978  | 0.004247  |
| 12               | 6                | 0              | -1.829006               | 1.228663  | 0.135283  |
| 13               | 6                | 0              | -1.982927               | -1.214238 | -0.177747 |
| 14               | 1                | 0              | -1.214416               | 2.110441  | 0.304540  |
| 15               | 1                | 0              | -1.394139               | -2.133109 | -0.302532 |
| 16               | 1                | 0              | -3.743972               | 0.651802  | -0.021741 |
| 17               | 7                | 0              | -3.265563               | -1.273083 | -0.222513 |
| 18               | 7                | 0              | -3.144639               | 1.467867  | 0.078522  |
| 19               | 6                | 0              | -3.860435               | -2.580843 | -0.432110 |

|    |   |   |           |           |           |
|----|---|---|-----------|-----------|-----------|
| 20 | 1 | 0 | -4.471114 | -2.568924 | -1.339588 |
| 21 | 1 | 0 | -3.114187 | -3.380189 | -0.522627 |
| 22 | 1 | 0 | -4.529264 | -2.819690 | 0.399888  |
| 23 | 6 | 0 | -3.725827 | 2.760796  | 0.384339  |
| 24 | 1 | 0 | -2.972120 | 3.537685  | 0.249845  |
| 25 | 1 | 0 | -4.557728 | 2.962673  | -0.291602 |
| 26 | 1 | 0 | -4.093544 | 2.803208  | 1.413779  |
| 27 | 8 | 0 | 4.431990  | -0.395745 | 0.241928  |
| 28 | 6 | 0 | 5.255490  | 0.581601  | -0.379504 |
| 29 | 1 | 0 | 6.282475  | 0.276362  | -0.186975 |
| 30 | 1 | 0 | 5.080594  | 0.612567  | -1.458628 |
| 31 | 1 | 0 | 5.084636  | 1.571774  | 0.052568  |

### Structure 35b (vacuum)

Energy (Hartrees): -651.482977096  
 No imaginary frequencies

Standard orientation:

| Center<br>Number | Atomic<br>Number | Atomic<br>Type | Coordinates (Angstroms) |           |           |
|------------------|------------------|----------------|-------------------------|-----------|-----------|
|                  |                  |                | X                       | Y         | Z         |
| 1                | 6                | 0              | 0.785361                | -0.897804 | -0.672621 |
| 2                | 6                | 0              | 2.178830                | -0.880139 | -0.650802 |
| 3                | 6                | 0              | 2.841022                | 0.018752  | 0.182110  |
| 4                | 6                | 0              | 2.098954                | 0.881750  | 0.992042  |
| 5                | 6                | 0              | 0.715989                | 0.843660  | 0.964794  |
| 6                | 6                | 0              | 0.023989                | -0.043008 | 0.124451  |
| 7                | 1                | 0              | 0.280938                | -1.589807 | -1.339024 |
| 8                | 1                | 0              | 2.726771                | -1.560397 | -1.288871 |
| 9                | 1                | 0              | 2.633272                | 1.560550  | 1.645756  |
| 10               | 1                | 0              | 0.151505                | 1.494136  | 1.625119  |
| 11               | 6                | 0              | -1.455862               | -0.088783 | 0.093651  |
| 12               | 6                | 0              | -2.223939               | 1.021450  | -0.020952 |
| 13               | 6                | 0              | -2.115976               | -1.399175 | 0.171156  |
| 14               | 1                | 0              | -1.442261               | -2.245659 | 0.378132  |
| 15               | 1                | 0              | -3.302469               | 0.887092  | -0.027701 |
| 16               | 7                | 0              | -3.363673               | -1.582939 | 0.027665  |
| 17               | 7                | 0              | -1.799034               | 2.313802  | -0.116011 |
| 18               | 1                | 0              | -0.814064               | 2.444700  | -0.303839 |
| 19               | 6                | 0              | -2.690614               | 3.343630  | -0.617534 |
| 20               | 1                | 0              | -3.668469               | 3.226999  | -0.148366 |
| 21               | 1                | 0              | -2.302140               | 4.325346  | -0.346713 |
| 22               | 1                | 0              | -2.819736               | 3.301272  | -1.704947 |
| 23               | 6                | 0              | -3.864742               | -2.932131 | 0.172811  |
| 24               | 1                | 0              | -4.571436               | -2.971153 | 1.006374  |
| 25               | 1                | 0              | -4.417470               | -3.214135 | -0.727155 |
| 26               | 1                | 0              | -3.072009               | -3.672641 | 0.349488  |
| 27               | 8                | 0              | 4.193106                | 0.126498  | 0.279968  |
| 28               | 6                | 0              | 4.977459                | -0.741557 | -0.509366 |
| 29               | 1                | 0              | 4.795302                | -0.579229 | -1.576593 |
| 30               | 1                | 0              | 6.014244                | -0.505587 | -0.279645 |
| 31               | 1                | 0              | 4.779300                | -1.789381 | -0.261784 |



### Structure 35b (CHCl<sub>3</sub>)

Energy (Hartrees): -651.502805176  
No imaginary frequencies

Standard orientation:

| Center<br>Number | Atomic<br>Number | Atomic<br>Type | Coordinates (Angstroms) |           |           |
|------------------|------------------|----------------|-------------------------|-----------|-----------|
|                  |                  |                | X                       | Y         | Z         |
| 1                | 6                | 0              | 0.793509                | -0.904009 | -0.651562 |
| 2                | 6                | 0              | 2.187391                | -0.879703 | -0.630904 |
| 3                | 6                | 0              | 2.846148                | 0.048166  | 0.173696  |
| 4                | 6                | 0              | 2.099058                | 0.935211  | 0.954095  |
| 5                | 6                | 0              | 0.715348                | 0.891012  | 0.927767  |
| 6                | 6                | 0              | 0.026094                | -0.027393 | 0.118542  |
| 7                | 1                | 0              | 0.295893                | -1.622368 | -1.295380 |
| 8                | 1                | 0              | 2.738705                | -1.577576 | -1.247253 |
| 9                | 1                | 0              | 2.625042                | 1.641572  | 1.586270  |
| 10               | 1                | 0              | 0.153826                | 1.566141  | 1.565681  |
| 11               | 6                | 0              | -1.454877               | -0.089671 | 0.093394  |
| 12               | 6                | 0              | -2.244043               | 1.012491  | -0.028712 |
| 13               | 6                | 0              | -2.090330               | -1.407583 | 0.187412  |
| 14               | 1                | 0              | -1.408193               | -2.231108 | 0.447049  |
| 15               | 1                | 0              | -3.320800               | 0.864879  | -0.020994 |
| 16               | 7                | 0              | -3.329222               | -1.636175 | 0.001934  |
| 17               | 7                | 0              | -1.853379               | 2.303578  | -0.147973 |
| 18               | 1                | 0              | -0.874042               | 2.478149  | -0.333101 |
| 19               | 6                | 0              | -2.782919               | 3.332432  | -0.581900 |
| 20               | 1                | 0              | -3.746464               | 3.174772  | -0.095436 |
| 21               | 1                | 0              | -2.405850               | 4.310391  | -0.282868 |
| 22               | 1                | 0              | -2.932511               | 3.326738  | -1.666764 |
| 23               | 6                | 0              | -3.791349               | -2.997308 | 0.186844  |
| 24               | 1                | 0              | -4.539704               | -3.026558 | 0.984402  |
| 25               | 1                | 0              | -4.285516               | -3.344166 | -0.725265 |
| 26               | 1                | 0              | -2.983566               | -3.696804 | 0.439689  |
| 27               | 8                | 0              | 4.197145                | 0.161258  | 0.268258  |
| 28               | 6                | 0              | 4.988649                | -0.738071 | -0.490185 |
| 29               | 1                | 0              | 4.813935                | -0.609008 | -1.562554 |
| 30               | 1                | 0              | 6.024593                | -0.494380 | -0.261668 |
| 31               | 1                | 0              | 4.789622                | -1.776006 | -0.206514 |

### Structure 35b (DMSO)

Energy (Hartrees): -651.500146744  
No imaginary frequencies

Standard orientation:

| Center<br>Number | Atomic<br>Number | Atomic<br>Type | Coordinates (Angstroms) |           |           |
|------------------|------------------|----------------|-------------------------|-----------|-----------|
|                  |                  |                | X                       | Y         | Z         |
| 1                | 6                | 0              | 0.798016                | -0.919847 | -0.623821 |
| 2                | 6                | 0              | 2.191926                | -0.891077 | -0.603623 |
| 3                | 6                | 0              | 2.848895                | 0.068843  | 0.165593  |
| 4                | 6                | 0              | 2.096730                | 0.982791  | 0.910317  |
| 5                | 6                | 0              | 0.712710                | 0.933325  | 0.886145  |
| 6                | 6                | 0              | 0.025868                | -0.017564 | 0.112462  |
| 7                | 1                | 0              | 0.305193                | -1.665474 | -1.239865 |
| 8                | 1                | 0              | 2.743629                | -1.611765 | -1.192891 |
| 9                | 1                | 0              | 2.616035                | 1.718216  | 1.514486  |
| 10               | 1                | 0              | 0.153303                | 1.632997  | 1.499020  |
| 11               | 6                | 0              | -1.454532               | -0.090632 | 0.090749  |
| 12               | 6                | 0              | -2.256513               | 1.006684  | -0.032372 |
| 13               | 6                | 0              | -2.074490               | -1.413975 | 0.188751  |
| 14               | 1                | 0              | -1.383548               | -2.228487 | 0.450983  |
| 15               | 1                | 0              | -3.332360               | 0.851104  | -0.018570 |
| 16               | 7                | 0              | -3.310697               | -1.664847 | 0.001477  |
| 17               | 7                | 0              | -1.883224               | 2.296713  | -0.160046 |

|    |   |   |           |           |           |
|----|---|---|-----------|-----------|-----------|
| 18 | 1 | 0 | -0.905058 | 2.493825  | -0.329584 |
| 19 | 6 | 0 | -2.826559 | 3.327525  | -0.559501 |
| 20 | 1 | 0 | -3.788796 | 3.138804  | -0.081861 |
| 21 | 1 | 0 | -2.460859 | 4.299256  | -0.228274 |
| 22 | 1 | 0 | -2.970546 | 3.353849  | -1.644368 |
| 23 | 6 | 0 | -3.745134 | -3.036169 | 0.192082  |
| 24 | 1 | 0 | -4.490261 | -3.080152 | 0.992295  |
| 25 | 1 | 0 | -4.234339 | -3.396739 | -0.717581 |
| 26 | 1 | 0 | -2.921066 | -3.716282 | 0.443806  |
| 27 | 8 | 0 | 4.197879  | 0.187267  | 0.255514  |
| 28 | 6 | 0 | 4.987075  | -0.746406 | -0.467763 |
| 29 | 1 | 0 | 4.808480  | -0.665063 | -1.543859 |
| 30 | 1 | 0 | 6.024313  | -0.495936 | -0.253118 |
| 31 | 1 | 0 | 4.786338  | -1.770335 | -0.138868 |

### Structure 35b (C<sub>2</sub>H<sub>5</sub>OH)

Energy (Hartrees): -651.503731266

No imaginary frequencies

Standard orientation:

| Center<br>Number | Atomic<br>Number | Atomic<br>Type | Coordinates (Angstroms) |           |           |
|------------------|------------------|----------------|-------------------------|-----------|-----------|
|                  |                  |                | X                       | Y         | Z         |
| 1                | 6                | 0              | 0.793727                | -0.905694 | -0.634095 |
| 2                | 6                | 0              | 2.187535                | -0.877529 | -0.617150 |
| 3                | 6                | 0              | 2.843413                | 0.072367  | 0.163366  |
| 4                | 6                | 0              | 2.096248                | 0.976950  | 0.922295  |
| 5                | 6                | 0              | 0.711947                | 0.928668  | 0.900144  |
| 6                | 6                | 0              | 0.024309                | -0.012065 | 0.115737  |
| 7                | 1                | 0              | 0.298081                | -1.643043 | -1.258043 |
| 8                | 1                | 0              | 2.739189                | -1.590120 | -1.216273 |
| 9                | 1                | 0              | 2.619181                | 1.702229  | 1.535999  |
| 10               | 1                | 0              | 0.153628                | 1.619413  | 1.523818  |
| 11               | 6                | 0              | -1.456150               | -0.087582 | 0.096106  |
| 12               | 6                | 0              | -2.260445               | 1.006964  | -0.026489 |
| 13               | 6                | 0              | -2.069508               | -1.413585 | 0.198008  |
| 14               | 1                | 0              | -1.378700               | -2.218195 | 0.489009  |
| 15               | 1                | 0              | -3.335888               | 0.849651  | -0.011050 |
| 16               | 7                | 0              | -3.298983               | -1.677314 | -0.014782 |
| 17               | 7                | 0              | -1.890464               | 2.299708  | -0.154010 |
| 18               | 1                | 0              | -0.913985               | 2.496464  | -0.334228 |
| 19               | 6                | 0              | -2.839963               | 3.320094  | -0.567983 |
| 20               | 1                | 0              | -3.797945               | 3.140324  | -0.078298 |
| 21               | 1                | 0              | -2.474557               | 4.299561  | -0.260019 |
| 22               | 1                | 0              | -2.993829               | 3.324330  | -1.651921 |
| 23               | 6                | 0              | -3.724174               | -3.049292 | 0.193164  |
| 24               | 1                | 0              | -4.481390               | -3.085908 | 0.982084  |
| 25               | 1                | 0              | -4.195837               | -3.430247 | -0.717154 |
| 26               | 1                | 0              | -2.899169               | -3.718131 | 0.469637  |
| 27               | 8                | 0              | 4.198124                | 0.189832  | 0.252758  |
| 28               | 6                | 0              | 4.989563                | -0.743570 | -0.471587 |
| 29               | 1                | 0              | 4.814952                | -0.654256 | -1.547334 |
| 30               | 1                | 0              | 6.025736                | -0.494839 | -0.249670 |
| 31               | 1                | 0              | 4.782661                | -1.767005 | -0.146181 |

### Structure 35c (vacuum)

Energy (Hartrees): -651.484596569  
No imaginary frequencies

Standard orientation:

| Center<br>Number | Atomic<br>Number | Atomic<br>Type | Coordinates (Angstroms) |           |           |
|------------------|------------------|----------------|-------------------------|-----------|-----------|
|                  |                  |                | X                       | Y         | Z         |
| 1                | 6                | 0              | -0.618003               | 0.729205  | -0.740176 |
| 2                | 6                | 0              | -2.005864               | 0.621689  | -0.711908 |
| 3                | 6                | 0              | -2.613229               | -0.248986 | 0.191709  |
| 4                | 6                | 0              | -1.823142               | -1.000366 | 1.063016  |
| 5                | 6                | 0              | -0.444000               | -0.882416 | 1.021330  |
| 6                | 6                | 0              | 0.188203                | -0.023288 | 0.111990  |
| 7                | 1                | 0              | -0.153419               | 1.423677  | -1.428458 |
| 8                | 1                | 0              | -2.595223               | 1.224231  | -1.389789 |
| 9                | 1                | 0              | -2.313910               | -1.657182 | 1.770842  |
| 10               | 1                | 0              | 0.160047                | -1.451518 | 1.720815  |
| 11               | 6                | 0              | 1.666277                | 0.077800  | 0.066923  |
| 12               | 6                | 0              | 2.460605                | -1.017133 | -0.016898 |
| 13               | 6                | 0              | 2.334568                | 1.376892  | 0.099146  |
| 14               | 1                | 0              | 3.540063                | -0.882223 | -0.031596 |
| 15               | 1                | 0              | 3.436527                | 1.329003  | 0.092430  |
| 16               | 7                | 0              | 1.732034                | 2.492749  | 0.126932  |
| 17               | 7                | 0              | 2.065022                | -2.325710 | -0.061758 |
| 18               | 1                | 0              | 1.078710                | -2.471992 | -0.232595 |
| 19               | 6                | 0              | 2.544589                | 3.689681  | 0.160086  |
| 20               | 1                | 0              | 2.299187                | 4.267884  | 1.054622  |
| 21               | 1                | 0              | 3.624704                | 3.484610  | 0.156225  |
| 22               | 1                | 0              | 2.302461                | 4.317745  | -0.701458 |
| 23               | 6                | 0              | 2.961070                | -3.332311 | -0.601791 |
| 24               | 1                | 0              | 3.944524                | -3.220730 | -0.141730 |
| 25               | 1                | 0              | 2.585271                | -4.323663 | -0.350103 |
| 26               | 1                | 0              | 3.075641                | -3.263112 | -1.689890 |
| 27               | 8                | 0              | -3.957280               | -0.427284 | 0.302770  |
| 28               | 6                | 0              | -4.790955               | 0.329439  | -0.548070 |
| 29               | 1                | 0              | -4.597164               | 0.099032  | -1.600669 |
| 30               | 1                | 0              | -5.812035               | 0.049057  | -0.298574 |
| 31               | 1                | 0              | -4.657258               | 1.402933  | -0.380591 |

### Structure 35c (CHCl<sub>3</sub>)

Energy (Hartrees): -651.505637378  
No imaginary frequencies

Standard orientation:

| Center<br>Number | Atomic<br>Number | Atomic<br>Type | Coordinates (Angstroms) |           |           |
|------------------|------------------|----------------|-------------------------|-----------|-----------|
|                  |                  |                | X                       | Y         | Z         |
| 1                | 6                | 0              | -0.630917               | 0.690300  | -0.787550 |
| 2                | 6                | 0              | -2.019963               | 0.590765  | -0.747199 |
| 3                | 6                | 0              | -2.624416               | -0.231789 | 0.203540  |
| 4                | 6                | 0              | -1.829638               | -0.939845 | 1.107861  |
| 5                | 6                | 0              | -0.449348               | -0.827192 | 1.054189  |
| 6                | 6                | 0              | 0.180954                | -0.015980 | 0.099983  |
| 7                | 1                | 0              | -0.172192               | 1.339124  | -1.524554 |
| 8                | 1                | 0              | -2.611602               | 1.157652  | -1.453842 |
| 9                | 1                | 0              | -2.313145               | -1.563814 | 1.850858  |
| 10               | 1                | 0              | 0.154624                | -1.368973 | 1.775528  |
| 11               | 6                | 0              | 1.660978                | 0.078517  | 0.038704  |
| 12               | 6                | 0              | 2.453788                | -1.024664 | -0.053459 |
| 13               | 6                | 0              | 2.339786                | 1.366829  | 0.071600  |
| 14               | 1                | 0              | 3.533131                | -0.889218 | -0.085610 |

|    |   |   |           |           |           |
|----|---|---|-----------|-----------|-----------|
| 15 | 1 | 0 | 3.438197  | 1.307225  | 0.021536  |
| 16 | 7 | 0 | 1.757220  | 2.495848  | 0.153278  |
| 17 | 7 | 0 | 2.059821  | -2.322468 | -0.089711 |
| 18 | 1 | 0 | 1.071315  | -2.496517 | -0.218710 |
| 19 | 6 | 0 | 2.599431  | 3.675804  | 0.172919  |
| 20 | 1 | 0 | 2.394921  | 4.256186  | 1.077081  |
| 21 | 1 | 0 | 3.672890  | 3.444780  | 0.138940  |
| 22 | 1 | 0 | 2.352662  | 4.317294  | -0.678376 |
| 23 | 6 | 0 | 2.962243  | -3.364745 | -0.548314 |
| 24 | 1 | 0 | 3.944830  | -3.216348 | -0.097330 |
| 25 | 1 | 0 | 2.584536  | -4.334880 | -0.226239 |
| 26 | 1 | 0 | 3.073040  | -3.372206 | -1.638025 |
| 27 | 8 | 0 | -3.967381 | -0.402714 | 0.325585  |
| 28 | 6 | 0 | -4.806964 | 0.322872  | -0.557035 |
| 29 | 1 | 0 | -4.618424 | 0.047885  | -1.599270 |
| 30 | 1 | 0 | -5.827765 | 0.053226  | -0.292491 |
| 31 | 1 | 0 | -4.672878 | 1.401401  | -0.430579 |

### Structure 35c (DMSO)

Energy (Hartrees): -651.504347762

No imaginary frequencies

Standard orientation:

| Center<br>Number | Atomic<br>Number | Atomic<br>Type | Coordinates (Angstroms) |           |           |
|------------------|------------------|----------------|-------------------------|-----------|-----------|
|                  |                  |                | X                       | Y         | Z         |
| 1                | 6                | 0              | -0.635855               | 0.679081  | -0.798973 |
| 2                | 6                | 0              | -2.025505               | 0.584130  | -0.752632 |
| 3                | 6                | 0              | -2.628766               | -0.224554 | 0.212155  |
| 4                | 6                | 0              | -1.829940               | -0.922991 | 1.121721  |
| 5                | 6                | 0              | -0.449278               | -0.814043 | 1.061706  |
| 6                | 6                | 0              | 0.179583                | -0.014760 | 0.095986  |
| 7                | 1                | 0              | -0.180403               | 1.310392  | -1.553817 |
| 8                | 1                | 0              | -2.617340               | 1.139244  | -1.468708 |
| 9                | 1                | 0              | -2.308730               | -1.541506 | 1.872578  |
| 10               | 1                | 0              | 0.154744                | -1.354381 | 1.784285  |
| 11               | 6                | 0              | 1.659486                | 0.080249  | 0.028071  |
| 12               | 6                | 0              | 2.454576                | -1.025371 | -0.069709 |
| 13               | 6                | 0              | 2.337877                | 1.365218  | 0.060933  |
| 14               | 1                | 0              | 3.533468                | -0.887743 | -0.109521 |
| 15               | 1                | 0              | 3.434291                | 1.306669  | -0.010373 |
| 16               | 7                | 0              | 1.758352                | 2.497262  | 0.166275  |
| 17               | 7                | 0              | 2.061558                | -2.316839 | -0.106215 |
| 18               | 1                | 0              | 1.071780                | -2.504109 | -0.205532 |
| 19               | 6                | 0              | 2.608174                | 3.674334  | 0.176955  |
| 20               | 1                | 0              | 2.422284                | 4.254869  | 1.085405  |
| 21               | 1                | 0              | 3.678660                | 3.435441  | 0.126699  |
| 22               | 1                | 0              | 2.355065                | 4.320071  | -0.669627 |
| 23               | 6                | 0              | 2.965810                | -3.374621 | -0.525666 |
| 24               | 1                | 0              | 3.951066                | -3.200841 | -0.090517 |
| 25               | 1                | 0              | 2.592300                | -4.331456 | -0.161876 |
| 26               | 1                | 0              | 3.064778                | -3.424294 | -1.614875 |
| 27               | 8                | 0              | -3.969337               | -0.389522 | 0.341093  |
| 28               | 6                | 0              | -4.806659               | 0.308721  | -0.569347 |
| 29               | 1                | 0              | -4.608866               | 0.003753  | -1.601090 |
| 30               | 1                | 0              | -5.828593               | 0.044115  | -0.304527 |
| 31               | 1                | 0              | -4.676179               | 1.390627  | -0.474884 |

### Structure 35c (C<sub>2</sub>H<sub>5</sub>OH)

Energy (Hartrees): -651.507631565  
No imaginary frequencies

Standard orientation:

| Center<br>Number | Atomic<br>Number | Atomic<br>Type | Coordinates (Angstroms) |           |           |
|------------------|------------------|----------------|-------------------------|-----------|-----------|
|                  |                  |                | X                       | Y         | Z         |
| 1                | 6                | 0              | -0.629429               | 0.620957  | -0.848609 |
| 2                | 6                | 0              | -2.019504               | 0.536218  | -0.796954 |
| 3                | 6                | 0              | -2.623784               | -0.201415 | 0.221126  |
| 4                | 6                | 0              | -1.831152               | -0.842719 | 1.175434  |
| 5                | 6                | 0              | -0.449731               | -0.744394 | 1.109233  |
| 6                | 6                | 0              | 0.181460                | -0.012852 | 0.093335  |
| 7                | 1                | 0              | -0.169505               | 1.193919  | -1.646487 |
| 8                | 1                | 0              | -2.609485               | 1.042763  | -1.549653 |
| 9                | 1                | 0              | -2.314506               | -1.406008 | 1.966210  |
| 10               | 1                | 0              | 0.152012                | -1.237549 | 1.866527  |
| 11               | 6                | 0              | 1.662644                | 0.073229  | 0.022715  |
| 12               | 6                | 0              | 2.447022                | -1.039135 | -0.065429 |
| 13               | 6                | 0              | 2.348452                | 1.354076  | 0.051642  |
| 14               | 1                | 0              | 3.527313                | -0.913483 | -0.108281 |
| 15               | 1                | 0              | 3.444340                | 1.288203  | -0.019629 |
| 16               | 7                | 0              | 1.776212                | 2.489964  | 0.156079  |
| 17               | 7                | 0              | 2.039604                | -2.328396 | -0.085977 |
| 18               | 1                | 0              | 1.047211                | -2.501536 | -0.185987 |
| 19               | 6                | 0              | 2.635439                | 3.660238  | 0.164426  |
| 20               | 1                | 0              | 2.454682                | 4.243776  | 1.071787  |
| 21               | 1                | 0              | 3.704035                | 3.413852  | 0.114382  |
| 22               | 1                | 0              | 2.387349                | 4.307134  | -0.682535 |
| 23               | 6                | 0              | 2.929636                | -3.392103 | -0.522538 |
| 24               | 1                | 0              | 3.917620                | -3.239123 | -0.085450 |
| 25               | 1                | 0              | 2.544364                | -4.349362 | -0.172329 |
| 26               | 1                | 0              | 3.027755                | -3.427763 | -1.612479 |
| 27               | 8                | 0              | -3.970975               | -0.349345 | 0.361987  |
| 28               | 6                | 0              | -4.808166               | 0.300559  | -0.586117 |
| 29               | 1                | 0              | -4.619843               | -0.073627 | -1.596293 |
| 30               | 1                | 0              | -5.830258               | 0.062653  | -0.297334 |
| 31               | 1                | 0              | -4.663316               | 1.383979  | -0.558642 |

### Structure 35d (vacuum)

Energy (Hartrees): -651.478005995  
No imaginary frequencies

Standard orientation:

| Center<br>Number | Atomic<br>Number | Atomic<br>Type | Coordinates (Angstroms) |           |           |
|------------------|------------------|----------------|-------------------------|-----------|-----------|
|                  |                  |                | X                       | Y         | Z         |
| 1                | 6                | 0              | -0.717396               | 0.919958  | 0.835674  |
| 2                | 6                | 0              | -2.095178               | 0.946455  | 0.919991  |
| 3                | 6                | 0              | -2.866114               | 0.033849  | 0.192918  |
| 4                | 6                | 0              | -2.236085               | -0.898768 | -0.623106 |
| 5                | 6                | 0              | -0.841933               | -0.908717 | -0.700173 |
| 6                | 6                | 0              | -0.056852               | -0.022153 | 0.031312  |
| 7                | 1                | 0              | -0.133739               | 1.638345  | 1.396524  |
| 8                | 1                | 0              | -2.607667               | 1.668572  | 1.543886  |
| 9                | 1                | 0              | -2.803584               | -1.604033 | -1.215010 |
| 10               | 1                | 0              | -0.362247               | -1.615110 | -1.369212 |
| 11               | 6                | 0              | 1.423270                | -0.097501 | -0.018487 |
| 12               | 6                | 0              | 2.019529                | -1.315871 | 0.033286  |
| 13               | 6                | 0              | 2.225180                | 1.120593  | -0.123913 |
| 14               | 1                | 0              | 3.314354                | 1.000516  | -0.001929 |
| 15               | 1                | 0              | 3.979712                | -0.872297 | -0.311053 |
| 16               | 1                | 0              | 1.394270                | -2.187088 | 0.216243  |

|    |   |   |           |           |           |
|----|---|---|-----------|-----------|-----------|
| 17 | 7 | 0 | 1.742092  | 2.277827  | -0.318550 |
| 18 | 7 | 0 | 3.337495  | -1.635956 | -0.169412 |
| 19 | 6 | 0 | 2.665240  | 3.389478  | -0.375303 |
| 20 | 1 | 0 | 3.716311  | 3.092837  | -0.246596 |
| 21 | 1 | 0 | 2.555421  | 3.897431  | -1.336697 |
| 22 | 1 | 0 | 2.406399  | 4.115798  | 0.399666  |
| 23 | 6 | 0 | 3.896229  | -2.818963 | 0.459788  |
| 24 | 1 | 0 | 3.207720  | -3.653971 | 0.316971  |
| 25 | 1 | 0 | 4.840028  | -3.075147 | -0.021187 |
| 26 | 1 | 0 | 4.067160  | -2.692579 | 1.534986  |
| 27 | 8 | 0 | -4.214995 | 0.142915  | 0.342223  |
| 28 | 6 | 0 | -5.025523 | -0.752015 | -0.386190 |
| 29 | 1 | 0 | -6.054287 | -0.506624 | -0.130973 |
| 30 | 1 | 0 | -4.879526 | -0.630236 | -1.464603 |
| 31 | 1 | 0 | -4.819675 | -1.790911 | -0.107855 |

### Structure 35d (CHCl<sub>3</sub>)

Energy (Hartrees): -651.500293594

No imaginary frequencies

Standard orientation:

| Center<br>Number | Atomic<br>Number | Atomic<br>Type | Coordinates (Angstroms) |           |           |
|------------------|------------------|----------------|-------------------------|-----------|-----------|
|                  |                  |                | X                       | Y         | Z         |
| 1                | 6                | 0              | -0.721517               | 0.943496  | 0.821194  |
| 2                | 6                | 0              | -2.101188               | 0.973217  | 0.903649  |
| 3                | 6                | 0              | -2.872843               | 0.051748  | 0.187053  |
| 4                | 6                | 0              | -2.240265               | -0.890033 | -0.618358 |
| 5                | 6                | 0              | -0.845697               | -0.900223 | -0.695906 |
| 6                | 6                | 0              | -0.056951               | -0.006033 | 0.026833  |
| 7                | 1                | 0              | -0.141207               | 1.663762  | 1.384845  |
| 8                | 1                | 0              | -2.608141               | 1.704300  | 1.523243  |
| 9                | 1                | 0              | -2.808038               | -1.603978 | -1.200361 |
| 10               | 1                | 0              | -0.368679               | -1.620263 | -1.352655 |
| 11               | 6                | 0              | 1.424511                | -0.087703 | -0.010358 |
| 12               | 6                | 0              | 2.012237                | -1.317066 | 0.050159  |
| 13               | 6                | 0              | 2.239898                | 1.118609  | -0.106620 |
| 14               | 1                | 0              | 3.320603                | 0.988051  | 0.052966  |
| 15               | 1                | 0              | 3.987673                | -0.903395 | -0.263867 |
| 16               | 1                | 0              | 1.376911                | -2.181773 | 0.230565  |
| 17               | 7                | 0              | 1.779149                | 2.282290  | -0.339734 |
| 18               | 7                | 0              | 3.319497                | -1.647824 | -0.127003 |
| 19               | 6                | 0              | 2.723623                | 3.380194  | -0.373941 |
| 20               | 1                | 0              | 3.764090                | 3.066015  | -0.213703 |
| 21               | 1                | 0              | 2.651943                | 3.889235  | -1.339120 |
| 22               | 1                | 0              | 2.456558                | 4.114409  | 0.391819  |
| 23               | 6                | 0              | 3.850397                | -2.882521 | 0.425614  |
| 24               | 1                | 0              | 3.126049                | -3.683967 | 0.268824  |
| 25               | 1                | 0              | 4.770669                | -3.146371 | -0.095187 |
| 26               | 1                | 0              | 4.058528                | -2.806193 | 1.498213  |
| 27               | 8                | 0              | -4.221215               | 0.157659  | 0.335137  |
| 28               | 6                | 0              | -5.033565               | -0.756212 | -0.380756 |
| 29               | 1                | 0              | -6.062930               | -0.509739 | -0.126474 |
| 30               | 1                | 0              | -4.892025               | -0.648689 | -1.460541 |
| 31               | 1                | 0              | -4.824645               | -1.788770 | -0.083884 |

## Structure 35d (DMSO)

Energy (Hartrees): -651.499697786  
No imaginary frequencies

Standard orientation:

| Center<br>Number | Atomic<br>Number | Atomic<br>Type | Coordinates (Angstroms) |           |           |
|------------------|------------------|----------------|-------------------------|-----------|-----------|
|                  |                  |                | X                       | Y         | Z         |
| 1                | 6                | 0              | -0.722995               | 0.936594  | 0.836564  |
| 2                | 6                | 0              | -2.103720               | 0.967217  | 0.913370  |
| 3                | 6                | 0              | -2.874572               | 0.051670  | 0.186293  |
| 4                | 6                | 0              | -2.237431               | -0.885885 | -0.622071 |
| 5                | 6                | 0              | -0.842200               | -0.895938 | -0.694542 |
| 6                | 6                | 0              | -0.054395               | -0.005603 | 0.035550  |
| 7                | 1                | 0              | -0.145682               | 1.648035  | 1.415388  |
| 8                | 1                | 0              | -2.609712               | 1.692826  | 1.540570  |
| 9                | 1                | 0              | -2.801845               | -1.599374 | -1.208207 |
| 10               | 1                | 0              | -0.364224               | -1.617565 | -1.349204 |
| 11               | 6                | 0              | 1.427385                | -0.082049 | 0.001008  |
| 12               | 6                | 0              | 2.019260                | -1.313446 | 0.061890  |
| 13               | 6                | 0              | 2.236883                | 1.125256  | -0.100168 |
| 14               | 1                | 0              | 3.316146                | 1.003248  | 0.068301  |
| 15               | 1                | 0              | 3.997757                | -0.896901 | -0.232446 |
| 16               | 1                | 0              | 1.383641                | -2.179825 | 0.234850  |
| 17               | 7                | 0              | 1.771426                | 2.285737  | -0.353169 |
| 18               | 7                | 0              | 3.323150                | -1.637965 | -0.102426 |
| 19               | 6                | 0              | 2.713631                | 3.387965  | -0.385259 |
| 20               | 1                | 0              | 3.753342                | 3.074216  | -0.224173 |
| 21               | 1                | 0              | 2.643121                | 3.899526  | -1.349419 |
| 22               | 1                | 0              | 2.445123                | 4.119852  | 0.382727  |
| 23               | 6                | 0              | 3.848744                | -2.897770 | 0.397532  |
| 24               | 1                | 0              | 3.111044                | -3.684208 | 0.229283  |
| 25               | 1                | 0              | 4.757447                | -3.152801 | -0.147238 |
| 26               | 1                | 0              | 4.077076                | -2.855220 | 1.467400  |
| 27               | 8                | 0              | -4.221237               | 0.156445  | 0.328365  |
| 28               | 6                | 0              | -5.027522               | -0.764713 | -0.390682 |
| 29               | 1                | 0              | -6.059231               | -0.524210 | -0.140634 |
| 30               | 1                | 0              | -4.882084               | -0.658245 | -1.469701 |
| 31               | 1                | 0              | -4.812462               | -1.795097 | -0.092155 |

## Structure 35d (C<sub>2</sub>H<sub>5</sub>OH)

Energy (Hartrees): -651.503007422  
No imaginary frequencies

Standard orientation:

| Center<br>Number | Atomic<br>Number | Atomic<br>Type | Coordinates (Angstroms) |           |           |
|------------------|------------------|----------------|-------------------------|-----------|-----------|
|                  |                  |                | X                       | Y         | Z         |
| 1                | 6                | 0              | -0.723789               | 0.928737  | 0.851424  |
| 2                | 6                | 0              | -2.104648               | 0.960251  | 0.927569  |
| 3                | 6                | 0              | -2.873140               | 0.056117  | 0.185993  |
| 4                | 6                | 0              | -2.239825               | -0.871131 | -0.635111 |
| 5                | 6                | 0              | -0.844686               | -0.882047 | -0.706421 |
| 6                | 6                | 0              | -0.057061               | -0.002962 | 0.037587  |
| 7                | 1                | 0              | -0.145868               | 1.629250  | 1.442897  |
| 8                | 1                | 0              | -2.611488               | 1.676278  | 1.565422  |
| 9                | 1                | 0              | -2.806238               | -1.574417 | -1.231590 |
| 10               | 1                | 0              | -0.366404               | -1.594054 | -1.371411 |
| 11               | 6                | 0              | 1.424437                | -0.083273 | 0.003770  |
| 12               | 6                | 0              | 2.011612                | -1.316260 | 0.059469  |
| 13               | 6                | 0              | 2.239513                | 1.120489  | -0.095420 |
| 14               | 1                | 0              | 3.316440                | 0.992034  | 0.081942  |
| 15               | 1                | 0              | 3.990117                | -0.903156 | -0.237019 |
| 16               | 1                | 0              | 1.374142                | -2.181174 | 0.232529  |
| 17               | 7                | 0              | 1.785080                | 2.283414  | -0.357437 |

|    |   |   |           |           |           |
|----|---|---|-----------|-----------|-----------|
| 18 | 7 | 0 | 3.315212  | -1.645193 | -0.113901 |
| 19 | 6 | 0 | 2.742623  | 3.373619  | -0.388544 |
| 20 | 1 | 0 | 3.777516  | 3.046945  | -0.224231 |
| 21 | 1 | 0 | 2.682072  | 3.884834  | -1.353331 |
| 22 | 1 | 0 | 2.482797  | 4.111182  | 0.376731  |
| 23 | 6 | 0 | 3.839313  | -2.898499 | 0.405510  |
| 24 | 1 | 0 | 3.107908  | -3.690362 | 0.234796  |
| 25 | 1 | 0 | 4.755778  | -3.155209 | -0.125283 |
| 26 | 1 | 0 | 4.053969  | -2.845986 | 1.477841  |
| 27 | 8 | 0 | -4.225526 | 0.161706  | 0.329049  |
| 28 | 6 | 0 | -5.036135 | -0.754918 | -0.394327 |
| 29 | 1 | 0 | -6.066049 | -0.514236 | -0.136919 |
| 30 | 1 | 0 | -4.893682 | -0.637757 | -1.472288 |
| 31 | 1 | 0 | -4.818132 | -1.786123 | -0.102107 |

### Structure 35e (vacuum)

Energy (Hartrees): -651.474971526

No imaginary frequencies

Standard orientation:

| Center<br>Number | Atomic<br>Number | Atomic<br>Type | Coordinates (Angstroms) |           |           |
|------------------|------------------|----------------|-------------------------|-----------|-----------|
|                  |                  |                | X                       | Y         | Z         |
| 1                | 6                | 0              | 0.869916                | 0.716497  | -0.598790 |
| 2                | 6                | 0              | 2.258482                | 0.693762  | -0.512924 |
| 3                | 6                | 0              | 2.895176                | -0.360178 | 0.142154  |
| 4                | 6                | 0              | 2.129133                | -1.374255 | 0.714421  |
| 5                | 6                | 0              | 0.747465                | -1.331983 | 0.625527  |
| 6                | 6                | 0              | 0.085068                | -0.296660 | -0.048077 |
| 7                | 1                | 0              | 0.388472                | 1.543612  | -1.103907 |
| 8                | 1                | 0              | 2.825542                | 1.499398  | -0.959784 |
| 9                | 1                | 0              | 2.637793                | -2.173753 | 1.239441  |
| 10               | 1                | 0              | 0.164256                | -2.108013 | 1.109482  |
| 11               | 6                | 0              | -1.392143               | -0.312152 | -0.196332 |
| 12               | 6                | 0              | -1.988143               | -1.492463 | -0.510613 |
| 13               | 6                | 0              | -2.162076               | 0.929385  | -0.084348 |
| 14               | 1                | 0              | -3.192284               | 0.889040  | -0.461900 |
| 15               | 1                | 0              | -3.517455               | -2.752331 | -0.845610 |
| 16               | 1                | 0              | -1.341460               | -2.322671 | -0.782500 |
| 17               | 7                | 0              | -1.687697               | 2.021635  | 0.356792  |
| 18               | 7                | 0              | -3.320510               | -1.816485 | -0.537062 |
| 19               | 6                | 0              | -2.561406               | 3.174649  | 0.353284  |
| 20               | 1                | 0              | -2.660491               | 3.553904  | 1.373662  |
| 21               | 1                | 0              | -2.106502               | 3.973561  | -0.238568 |
| 22               | 1                | 0              | -3.563485               | 2.964106  | -0.047550 |
| 23               | 6                | 0              | -4.347616               | -1.205349 | 0.288560  |
| 24               | 1                | 0              | -3.888418               | -0.753373 | 1.171917  |
| 25               | 1                | 0              | -4.913966               | -0.435480 | -0.241304 |
| 26               | 1                | 0              | -5.047336               | -1.975556 | 0.616407  |
| 27               | 8                | 0              | 4.244708                | -0.476878 | 0.282357  |
| 28               | 6                | 0              | 5.048750                | 0.540581  | -0.272384 |
| 29               | 1                | 0              | 6.078643                | 0.265668  | -0.054387 |
| 30               | 1                | 0              | 4.912272                | 0.607547  | -1.356704 |
| 31               | 1                | 0              | 4.828567                | 1.512319  | 0.181469  |



### Structure 35e (CHCl<sub>3</sub>)

Energy (Hartrees): -651.497223433  
No imaginary frequencies

Standard orientation:

| Center<br>Number | Atomic<br>Number | Atomic<br>Type | Coordinates (Angstroms) |           |           |
|------------------|------------------|----------------|-------------------------|-----------|-----------|
|                  |                  |                | X                       | Y         | Z         |
| 1                | 6                | 0              | 0.871833                | 0.683152  | -0.634972 |
| 2                | 6                | 0              | 2.261739                | 0.663683  | -0.559013 |
| 3                | 6                | 0              | 2.901622                | -0.354135 | 0.149967  |
| 4                | 6                | 0              | 2.135896                | -1.334788 | 0.780459  |
| 5                | 6                | 0              | 0.751767                | -1.294520 | 0.700004  |
| 6                | 6                | 0              | 0.084573                | -0.293744 | -0.020698 |
| 7                | 1                | 0              | 0.391259                | 1.479834  | -1.190083 |
| 8                | 1                | 0              | 2.827644                | 1.439976  | -1.057228 |
| 9                | 1                | 0              | 2.641822                | -2.112646 | 1.341265  |
| 10               | 1                | 0              | 0.173480                | -2.049988 | 1.221673  |
| 11               | 6                | 0              | -1.397308               | -0.307443 | -0.159323 |
| 12               | 6                | 0              | -1.987198               | -1.506227 | -0.447715 |
| 13               | 6                | 0              | -2.157075               | 0.936620  | -0.052937 |
| 14               | 1                | 0              | -3.192442               | 0.902440  | -0.408302 |
| 15               | 1                | 0              | -3.461494               | -2.826412 | -0.756486 |
| 16               | 1                | 0              | -1.324675               | -2.334938 | -0.684097 |
| 17               | 7                | 0              | -1.675159               | 2.035476  | 0.376114  |
| 18               | 7                | 0              | -3.294706               | -1.870209 | -0.488048 |
| 19               | 6                | 0              | -2.553453               | 3.188063  | 0.374741  |
| 20               | 1                | 0              | -2.639976               | 3.580671  | 1.392013  |
| 21               | 1                | 0              | -2.113649               | 3.983295  | -0.234467 |
| 22               | 1                | 0              | -3.560344               | 2.968906  | -0.006258 |
| 23               | 6                | 0              | -4.414572               | -1.183046 | 0.127996  |
| 24               | 1                | 0              | -4.091610               | -0.687942 | 1.048123  |
| 25               | 1                | 0              | -4.868701               | -0.439981 | -0.532357 |
| 26               | 1                | 0              | -5.175065               | -1.922622 | 0.379316  |
| 27               | 8                | 0              | 4.251358                | -0.463922 | 0.285108  |
| 28               | 6                | 0              | 5.056706                | 0.517675  | -0.344312 |
| 29               | 1                | 0              | 6.088044                | 0.253977  | -0.116417 |
| 30               | 1                | 0              | 4.912260                | 0.511916  | -1.428963 |
| 31               | 1                | 0              | 4.844470                | 1.516286  | 0.049755  |

### Structure 35e (DMSO)

Energy (Hartrees): -651.496823554  
No imaginary frequencies

Standard orientation:

| Center<br>Number | Atomic<br>Number | Atomic<br>Type | Coordinates (Angstroms) |           |           |
|------------------|------------------|----------------|-------------------------|-----------|-----------|
|                  |                  |                | X                       | Y         | Z         |
| 1                | 6                | 0              | 0.863108                | 0.626637  | -0.689305 |
| 2                | 6                | 0              | 2.253997                | 0.612371  | -0.622179 |
| 3                | 6                | 0              | 2.898793                | -0.354788 | 0.151998  |
| 4                | 6                | 0              | 2.134668                | -1.290512 | 0.851326  |
| 5                | 6                | 0              | 0.749132                | -1.254574 | 0.778583  |
| 6                | 6                | 0              | 0.077814                | -0.302004 | -0.000949 |
| 7                | 1                | 0              | 0.381272                | 1.379397  | -1.302589 |
| 8                | 1                | 0              | 2.816383                | 1.350281  | -1.179373 |
| 9                | 1                | 0              | 2.641033                | -2.033042 | 1.457946  |
| 10               | 1                | 0              | 0.174718                | -1.978603 | 1.347493  |
| 11               | 6                | 0              | -1.407153               | -0.308564 | -0.122619 |
| 12               | 6                | 0              | -2.001213               | -1.520573 | -0.365679 |
| 13               | 6                | 0              | -2.142053               | 0.947030  | -0.011765 |
| 14               | 1                | 0              | -3.191289               | 0.931671  | -0.317734 |
| 15               | 1                | 0              | -3.451067               | -2.868554 | -0.656953 |
| 16               | 1                | 0              | -1.330766               | -2.357491 | -0.543744 |

|    |   |   |           |           |           |
|----|---|---|-----------|-----------|-----------|
| 17 | 7 | 0 | -1.624318 | 2.044632  | 0.387314  |
| 18 | 7 | 0 | -3.294692 | -1.902376 | -0.415306 |
| 19 | 6 | 0 | -2.490184 | 3.209185  | 0.407135  |
| 20 | 1 | 0 | -2.510281 | 3.632993  | 1.415540  |
| 21 | 1 | 0 | -2.084911 | 3.981099  | -0.254361 |
| 22 | 1 | 0 | -3.520374 | 2.987586  | 0.098546  |
| 23 | 6 | 0 | -4.469575 | -1.135778 | -0.052145 |
| 24 | 1 | 0 | -4.295023 | -0.587188 | 0.877632  |
| 25 | 1 | 0 | -4.763435 | -0.428150 | -0.832178 |
| 26 | 1 | 0 | -5.291523 | -1.833140 | 0.104890  |
| 27 | 8 | 0 | 4.247083  | -0.455207 | 0.284299  |
| 28 | 6 | 0 | 5.045667  | 0.488611  | -0.413953 |
| 29 | 1 | 0 | 6.079753  | 0.242434  | -0.179656 |
| 30 | 1 | 0 | 4.891317  | 0.415190  | -1.494432 |
| 31 | 1 | 0 | 4.832599  | 1.509138  | -0.082157 |

### Structure 35e (C<sub>2</sub>H<sub>5</sub>OH)

Energy (Hartrees): -651.500093884

No imaginary frequencies

Standard orientation:

| Center<br>Number | Atomic<br>Number | Atomic<br>Type | Coordinates (Angstroms) |           |           |
|------------------|------------------|----------------|-------------------------|-----------|-----------|
|                  |                  |                | X                       | Y         | Z         |
| 1                | 6                | 0              | 0.870572                | 0.648491  | -0.677835 |
| 2                | 6                | 0              | 2.260761                | 0.635108  | -0.600252 |
| 3                | 6                | 0              | 2.898710                | -0.349556 | 0.155446  |
| 4                | 6                | 0              | 2.133865                | -1.302760 | 0.827536  |
| 5                | 6                | 0              | 0.748835                | -1.267348 | 0.745297  |
| 6                | 6                | 0              | 0.082369                | -0.297955 | -0.017401 |
| 7                | 1                | 0              | 0.392065                | 1.413951  | -1.277932 |
| 8                | 1                | 0              | 2.826841                | 1.386624  | -1.135141 |
| 9                | 1                | 0              | 2.638116                | -2.058139 | 1.420376  |
| 10               | 1                | 0              | 0.171295                | -2.004301 | 1.294000  |
| 11               | 6                | 0              | -1.400257               | -0.309076 | -0.152639 |
| 12               | 6                | 0              | -1.990603               | -1.515789 | -0.420492 |
| 13               | 6                | 0              | -2.149760               | 0.939189  | -0.047819 |
| 14               | 1                | 0              | -3.179583               | 0.920489  | -0.416682 |
| 15               | 1                | 0              | -3.454710               | -2.849963 | -0.706477 |
| 16               | 1                | 0              | -1.324969               | -2.348838 | -0.632290 |
| 17               | 7                | 0              | -1.664993               | 2.031428  | 0.402212  |
| 18               | 7                | 0              | -3.290520               | -1.885652 | -0.462693 |
| 19               | 6                | 0              | -2.539946               | 3.189346  | 0.392247  |
| 20               | 1                | 0              | -2.644873               | 3.578403  | 1.409297  |
| 21               | 1                | 0              | -2.087875               | 3.986772  | -0.205186 |
| 22               | 1                | 0              | -3.539551               | 2.975077  | -0.007643 |
| 23               | 6                | 0              | -4.431994               | -1.157723 | 0.059182  |
| 24               | 1                | 0              | -4.155199               | -0.626634 | 0.974260  |
| 25               | 1                | 0              | -4.836852               | -0.439612 | -0.658251 |
| 26               | 1                | 0              | -5.214541               | -1.877929 | 0.297108  |
| 27               | 8                | 0              | 4.251984                | -0.452314 | 0.295305  |
| 28               | 6                | 0              | 5.057808                | 0.507184  | -0.376096 |
| 29               | 1                | 0              | 6.089203                | 0.253302  | -0.138009 |
| 30               | 1                | 0              | 4.910242                | 0.455556  | -1.458409 |
| 31               | 1                | 0              | 4.840958                | 1.518654  | -0.021140 |

### Structure 35f (vacuum)

Energy (Hartrees): -651.473774810  
No imaginary frequencies

Standard orientation:

| Center<br>Number | Atomic<br>Number | Atomic<br>Type | Coordinates (Angstroms) |           |           |
|------------------|------------------|----------------|-------------------------|-----------|-----------|
|                  |                  |                | X                       | Y         | Z         |
| 1                | 6                | 0              | -0.856646               | 0.646076  | 1.108523  |
| 2                | 6                | 0              | -2.229209               | 0.800917  | 1.176717  |
| 3                | 6                | 0              | -3.052461               | 0.190706  | 0.227355  |
| 4                | 6                | 0              | -2.479879               | -0.566817 | -0.790305 |
| 5                | 6                | 0              | -1.091966               | -0.698893 | -0.851521 |
| 6                | 6                | 0              | -0.254783               | -0.111877 | 0.093149  |
| 7                | 1                | 0              | -0.234518               | 1.105000  | 1.869953  |
| 8                | 1                | 0              | -2.694371               | 1.379904  | 1.965370  |
| 9                | 1                | 0              | -3.089012               | -1.040965 | -1.548201 |
| 10               | 1                | 0              | -0.652603               | -1.260999 | -1.668891 |
| 11               | 6                | 0              | 1.227726                | -0.269715 | 0.029411  |
| 12               | 6                | 0              | 1.724102                | -1.533257 | -0.038048 |
| 13               | 6                | 0              | 1.985973                | 0.982383  | -0.050862 |
| 14               | 1                | 0              | 0.992736                | -2.333581 | -0.121216 |
| 15               | 1                | 0              | 1.456078                | 1.864155  | 0.341380  |
| 16               | 1                | 0              | 3.077096                | -2.997516 | 0.024174  |
| 17               | 7                | 0              | 3.119633                | 1.116687  | -0.609856 |
| 18               | 7                | 0              | 3.003612                | -1.994891 | 0.021832  |
| 19               | 6                | 0              | 4.109985                | -1.294912 | 0.651844  |
| 20               | 1                | 0              | 4.556680                | -0.569913 | -0.026942 |
| 21               | 1                | 0              | 3.758481                | -0.757021 | 1.538556  |
| 22               | 1                | 0              | 4.850759                | -2.034405 | 0.955946  |
| 23               | 6                | 0              | 3.688730                | 2.448522  | -0.640341 |
| 24               | 1                | 0              | 3.911786                | 2.721064  | -1.674842 |
| 25               | 1                | 0              | 3.030569                | 3.212119  | -0.203441 |
| 26               | 1                | 0              | 4.638067                | 2.452485  | -0.096511 |
| 27               | 8                | 0              | -4.389774               | 0.395120  | 0.378377  |
| 28               | 6                | 0              | -5.251207               | -0.207467 | -0.562037 |
| 29               | 1                | 0              | -6.261586               | 0.068239  | -0.267944 |
| 30               | 1                | 0              | -5.053880               | 0.161816  | -1.573772 |
| 31               | 1                | 0              | -5.152995               | -1.297911 | -0.547781 |

### Structure 35f (CHCl<sub>3</sub>)

Energy (Hartrees): -651.493755588  
No imaginary frequencies

Standard orientation:

| Center<br>Number | Atomic<br>Number | Atomic<br>Type | Coordinates (Angstroms) |           |           |
|------------------|------------------|----------------|-------------------------|-----------|-----------|
|                  |                  |                | X                       | Y         | Z         |
| 1                | 6                | 0              | -0.853778               | 0.687987  | 1.081593  |
| 2                | 6                | 0              | -2.227730               | 0.844445  | 1.149910  |
| 3                | 6                | 0              | -3.056054               | 0.203579  | 0.224312  |
| 4                | 6                | 0              | -2.486546               | -0.587385 | -0.770724 |
| 5                | 6                | 0              | -1.098696               | -0.722097 | -0.832698 |
| 6                | 6                | 0              | -0.255079               | -0.103684 | 0.088897  |
| 7                | 1                | 0              | -0.231992               | 1.175153  | 1.825948  |
| 8                | 1                | 0              | -2.684143               | 1.451650  | 1.923502  |
| 9                | 1                | 0              | -3.099091               | -1.087692 | -1.509321 |
| 10               | 1                | 0              | -0.667666               | -1.317557 | -1.630968 |
| 11               | 6                | 0              | 1.227118                | -0.270670 | 0.027180  |
| 12               | 6                | 0              | 1.724576                | -1.536318 | -0.044732 |
| 13               | 6                | 0              | 2.003204                | 0.971756  | -0.035227 |
| 14               | 1                | 0              | 1.002350                | -2.342741 | -0.145852 |
| 15               | 1                | 0              | 1.535674                | 1.844653  | 0.443218  |
| 16               | 1                | 0              | 3.084332                | -2.992028 | 0.042925  |

|    |   |   |           |           |           |
|----|---|---|-----------|-----------|-----------|
| 17 | 7 | 0 | 3.098256  | 1.105088  | -0.670789 |
| 18 | 7 | 0 | 3.004056  | -1.987780 | 0.036392  |
| 19 | 6 | 0 | 4.092890  | -1.283353 | 0.689394  |
| 20 | 1 | 0 | 4.568494  | -0.565426 | 0.021086  |
| 21 | 1 | 0 | 3.722704  | -0.737658 | 1.564158  |
| 22 | 1 | 0 | 4.823938  | -2.021978 | 1.017773  |
| 23 | 6 | 0 | 3.717654  | 2.416714  | -0.655880 |
| 24 | 1 | 0 | 3.871119  | 2.757292  | -1.683436 |
| 25 | 1 | 0 | 3.129155  | 3.169327  | -0.114791 |
| 26 | 1 | 0 | 4.706561  | 2.346884  | -0.192150 |
| 27 | 8 | 0 | -4.392625 | 0.411398  | 0.371111  |
| 28 | 6 | 0 | -5.260289 | -0.227836 | -0.549061 |
| 29 | 1 | 0 | -6.270139 | 0.060573  | -0.263078 |
| 30 | 1 | 0 | -5.065169 | 0.104925  | -1.573105 |
| 31 | 1 | 0 | -5.164928 | -1.316545 | -0.491798 |

### Structure 35f (DMSO)

Energy (Hartrees): -651.492178820  
 No imaginary frequencies

Standard orientation:

| Center<br>Number | Atomic<br>Number | Atomic<br>Type | Coordinates (Angstroms) |           |           |
|------------------|------------------|----------------|-------------------------|-----------|-----------|
|                  |                  |                | X                       | Y         | Z         |
| 1                | 6                | 0              | -0.851601               | 0.759975  | 1.028910  |
| 2                | 6                | 0              | -2.225850               | 0.923135  | 1.089880  |
| 3                | 6                | 0              | -3.059808               | 0.224308  | 0.211714  |
| 4                | 6                | 0              | -2.492812               | -0.631909 | -0.730944 |
| 5                | 6                | 0              | -1.105444               | -0.772674 | -0.787931 |
| 6                | 6                | 0              | -0.256132               | -0.097015 | 0.088938  |
| 7                | 1                | 0              | -0.230384               | 1.297274  | 1.738131  |
| 8                | 1                | 0              | -2.674289               | 1.584083  | 1.823331  |
| 9                | 1                | 0              | -3.107090               | -1.181215 | -1.432540 |
| 10               | 1                | 0              | -0.682280               | -1.424882 | -1.545122 |
| 11               | 6                | 0              | 1.225009                | -0.272173 | 0.033609  |
| 12               | 6                | 0              | 1.723468                | -1.539124 | -0.033938 |
| 13               | 6                | 0              | 2.012258                | 0.964021  | -0.030356 |
| 14               | 1                | 0              | 1.006245                | -2.349986 | -0.135015 |
| 15               | 1                | 0              | 1.579298                | 1.836498  | 0.478431  |
| 16               | 1                | 0              | 3.085851                | -2.989074 | 0.071365  |
| 17               | 7                | 0              | 3.088666                | 1.089257  | -0.700004 |
| 18               | 7                | 0              | 3.004402                | -1.983994 | 0.051714  |
| 19               | 6                | 0              | 4.085562                | -1.275525 | 0.714300  |
| 20               | 1                | 0              | 4.580549                | -0.568522 | 0.047531  |
| 21               | 1                | 0              | 3.703311                | -0.715906 | 1.574982  |
| 22               | 1                | 0              | 4.805988                | -2.014097 | 1.064677  |
| 23               | 6                | 0              | 3.735421                | 2.388951  | -0.677462 |
| 24               | 1                | 0              | 3.871899                | 2.745523  | -1.702103 |
| 25               | 1                | 0              | 3.173531                | 3.141108  | -0.109172 |
| 26               | 1                | 0              | 4.732843                | 2.291029  | -0.237638 |
| 27               | 8                | 0              | -4.393731               | 0.442822  | 0.346635  |
| 28               | 6                | 0              | -5.263195               | -0.270970 | -0.519262 |
| 29               | 1                | 0              | -6.273623               | 0.032404  | -0.251716 |
| 30               | 1                | 0              | -5.074122               | -0.018550 | -1.566755 |
| 31               | 1                | 0              | -5.160607               | -1.351110 | -0.378181 |

### Structure 35f (C<sub>2</sub>H<sub>5</sub>OH)

Energy (Hartrees): -651.495442906  
No imaginary frequencies

Standard orientation:

| Center<br>Number | Atomic<br>Number | Atomic<br>Type | Coordinates (Angstroms) |           |           |
|------------------|------------------|----------------|-------------------------|-----------|-----------|
|                  |                  |                | X                       | Y         | Z         |
| 1                | 6                | 0              | -0.848594               | 0.730943  | 1.051330  |
| 2                | 6                | 0              | -2.222902               | 0.893230  | 1.113919  |
| 3                | 6                | 0              | -3.052850               | 0.216917  | 0.216137  |
| 4                | 6                | 0              | -2.487692               | -0.616382 | -0.746127 |
| 5                | 6                | 0              | -1.100312               | -0.756990 | -0.803598 |
| 6                | 6                | 0              | -0.253070               | -0.102862 | 0.091254  |
| 7                | 1                | 0              | -0.228013               | 1.249047  | 1.775354  |
| 8                | 1                | 0              | -2.673661               | 1.535095  | 1.863034  |
| 9                | 1                | 0              | -3.102098               | -1.146918 | -1.461932 |
| 10               | 1                | 0              | -0.674795               | -1.389998 | -1.575694 |
| 11               | 6                | 0              | 1.228140                | -0.276909 | 0.033115  |
| 12               | 6                | 0              | 1.726160                | -1.542639 | -0.038077 |
| 13               | 6                | 0              | 2.011712                | 0.962132  | -0.023896 |
| 14               | 1                | 0              | 1.008563                | -2.353576 | -0.135949 |
| 15               | 1                | 0              | 1.583718                | 1.824451  | 0.506050  |
| 16               | 1                | 0              | 3.086968                | -2.992092 | 0.080554  |
| 17               | 7                | 0              | 3.075924                | 1.103175  | -0.709827 |
| 18               | 7                | 0              | 3.009437                | -1.987225 | 0.040509  |
| 19               | 6                | 0              | 4.085994                | -1.272745 | 0.705717  |
| 20               | 1                | 0              | 4.573417                | -0.557957 | 0.041965  |
| 21               | 1                | 0              | 3.702236                | -0.722647 | 1.572070  |
| 22               | 1                | 0              | 4.815194                | -2.006201 | 1.048780  |
| 23               | 6                | 0              | 3.717170                | 2.405885  | -0.669533 |
| 24               | 1                | 0              | 3.841017                | 2.783577  | -1.688016 |
| 25               | 1                | 0              | 3.158850                | 3.144419  | -0.080638 |
| 26               | 1                | 0              | 4.719776                | 2.304658  | -0.242652 |
| 27               | 8                | 0              | -4.392572               | 0.434868  | 0.353838  |
| 28               | 6                | 0              | -5.264040               | -0.255992 | -0.531397 |
| 29               | 1                | 0              | -6.273154               | 0.045797  | -0.256954 |
| 30               | 1                | 0              | -5.069979               | 0.022983  | -1.570851 |
| 31               | 1                | 0              | -5.163298               | -1.338757 | -0.413658 |

### Structure 36a (vacuum)

Energy (Hartrees): -741.472505528  
No imaginary frequencies

Standard orientation:

| Center<br>Number | Atomic<br>Number | Atomic<br>Type | Coordinates (Angstroms) |           |           |
|------------------|------------------|----------------|-------------------------|-----------|-----------|
|                  |                  |                | X                       | Y         | Z         |
| 1                | 6                | 0              | -0.733180               | 1.054393  | 0.544099  |
| 2                | 6                | 0              | -2.117725               | 1.066810  | 0.556709  |
| 3                | 6                | 0              | -2.800081               | -0.006840 | 0.002428  |
| 4                | 6                | 0              | -2.131945               | -1.080141 | -0.570044 |
| 5                | 6                | 0              | -0.747743               | -1.067871 | -0.590394 |
| 6                | 6                | 0              | -0.014048               | -0.010667 | -0.025241 |
| 7                | 1                | 0              | -0.198630               | 1.870065  | 1.015925  |
| 8                | 1                | 0              | -2.672864               | 1.880419  | 1.004008  |
| 9                | 1                | 0              | -2.698442               | -1.890038 | -1.009768 |
| 10               | 1                | 0              | -0.223326               | -1.876858 | -1.085180 |
| 11               | 6                | 0              | 1.456566                | -0.013270 | -0.024006 |
| 12               | 6                | 0              | 2.133434                | -1.197672 | 0.152866  |
| 13               | 6                | 0              | 2.169928                | 1.238309  | -0.198485 |
| 14               | 1                | 0              | 1.566536                | -2.111677 | 0.316333  |
| 15               | 1                | 0              | 1.547375                | 2.124909  | -0.381874 |
| 16               | 1                | 0              | 3.989118                | -0.473993 | 0.057908  |
| 17               | 7                | 0              | 3.445370                | 1.346395  | -0.186253 |
| 18               | 7                | 0              | 3.460430                | -1.341958 | 0.168596  |
| 19               | 6                | 0              | 4.012265                | 2.660856  | -0.411065 |

|    |   |   |           |           |           |
|----|---|---|-----------|-----------|-----------|
| 20 | 1 | 0 | 4.660988  | 2.634662  | -1.290188 |
| 21 | 1 | 0 | 3.248333  | 3.434551  | -0.560318 |
| 22 | 1 | 0 | 4.634463  | 2.940479  | 0.442728  |
| 23 | 6 | 0 | 4.127850  | -2.589256 | 0.472905  |
| 24 | 1 | 0 | 3.409730  | -3.408123 | 0.415045  |
| 25 | 1 | 0 | 4.922990  | -2.778624 | -0.249822 |
| 26 | 1 | 0 | 4.561222  | -2.577670 | 1.476705  |
| 27 | 7 | 0 | -4.269419 | -0.005598 | 0.017919  |
| 28 | 8 | 0 | -4.839383 | -0.954433 | -0.480329 |
| 29 | 8 | 0 | -4.827379 | 0.943447  | 0.528832  |

### Structure 36a (CHCl<sub>3</sub>)

Energy (Hartrees): -741.492418779

No imaginary frequencies

Standard orientation:

| Center<br>Number | Atomic<br>Number | Atomic<br>Type | Coordinates (Angstroms) |           |           |
|------------------|------------------|----------------|-------------------------|-----------|-----------|
|                  |                  |                | X                       | Y         | Z         |
| 1                | 6                | 0              | -0.732402               | 1.068861  | 0.517832  |
| 2                | 6                | 0              | -2.115695               | 1.081278  | 0.530103  |
| 3                | 6                | 0              | -2.800123               | -0.007802 | 0.003382  |
| 4                | 6                | 0              | -2.129106               | -1.098114 | -0.539187 |
| 5                | 6                | 0              | -0.746416               | -1.087381 | -0.558615 |
| 6                | 6                | 0              | -0.009902               | -0.012359 | -0.023595 |
| 7                | 1                | 0              | -0.202705               | 1.899166  | 0.969250  |
| 8                | 1                | 0              | -2.661481               | 1.911183  | 0.959469  |
| 9                | 1                | 0              | -2.686276               | -1.924795 | -0.960022 |
| 10               | 1                | 0              | -0.226913               | -1.914498 | -1.028068 |
| 11               | 6                | 0              | 1.457744                | -0.011785 | -0.024896 |
| 12               | 6                | 0              | 2.137047                | -1.203641 | 0.143407  |
| 13               | 6                | 0              | 2.166869                | 1.243178  | -0.191530 |
| 14               | 1                | 0              | 1.574970                | -2.121959 | 0.297739  |
| 15               | 1                | 0              | 1.545907                | 2.127897  | -0.383809 |
| 16               | 1                | 0              | 3.997926                | -0.485558 | 0.064565  |
| 17               | 7                | 0              | 3.443279                | 1.357842  | -0.166869 |
| 18               | 7                | 0              | 3.458467                | -1.346834 | 0.164957  |
| 19               | 6                | 0              | 4.001925                | 2.677186  | -0.391873 |
| 20               | 1                | 0              | 4.645844                | 2.658233  | -1.275661 |
| 21               | 1                | 0              | 3.233398                | 3.447485  | -0.532787 |
| 22               | 1                | 0              | 4.629993                | 2.957893  | 0.457987  |
| 23               | 6                | 0              | 4.126092                | -2.602838 | 0.443302  |
| 24               | 1                | 0              | 3.405478                | -3.417940 | 0.371914  |
| 25               | 1                | 0              | 4.920725                | -2.773207 | -0.284428 |
| 26               | 1                | 0              | 4.561012                | -2.603340 | 1.446034  |
| 27               | 7                | 0              | -4.260040               | -0.005529 | 0.016335  |
| 28               | 8                | 0              | -4.840692               | -0.980002 | -0.425354 |
| 29               | 8                | 0              | -4.830061               | 0.970199  | 0.468714  |

### Structure 36a (DMSO)

Energy (Hartrees): -741.489801954

No imaginary frequencies

Standard orientation:

| Center<br>Number | Atomic<br>Number | Atomic<br>Type | Coordinates (Angstroms) |           |           |
|------------------|------------------|----------------|-------------------------|-----------|-----------|
|                  |                  |                | X                       | Y         | Z         |
| 1                | 6                | 0              | -0.733572               | 1.089333  | 0.475168  |
| 2                | 6                | 0              | -2.116540               | 1.101125  | 0.486406  |
| 3                | 6                | 0              | -2.802046               | -0.007826 | 0.002648  |
| 4                | 6                | 0              | -2.128403               | -1.118322 | -0.496484 |
| 5                | 6                | 0              | -0.746282               | -1.108787 | -0.515407 |
| 6                | 6                | 0              | -0.008226               | -0.012336 | -0.023277 |

|    |   |   |           |           |           |
|----|---|---|-----------|-----------|-----------|
| 7  | 1 | 0 | -0.208724 | 1.939961  | 0.892581  |
| 8  | 1 | 0 | -2.659134 | 1.949756  | 0.882075  |
| 9  | 1 | 0 | -2.681228 | -1.964194 | -0.883804 |
| 10 | 1 | 0 | -0.231271 | -1.957699 | -0.949069 |
| 11 | 6 | 0 | 1.458091  | -0.010074 | -0.024154 |
| 12 | 6 | 0 | 2.139576  | -1.205900 | 0.133778  |
| 13 | 6 | 0 | 2.166862  | 1.246269  | -0.181390 |
| 14 | 1 | 0 | 1.580059  | -2.127105 | 0.276086  |
| 15 | 1 | 0 | 1.549000  | 2.132532  | -0.372804 |
| 16 | 1 | 0 | 4.003351  | -0.489580 | 0.065557  |
| 17 | 7 | 0 | 3.443996  | 1.361212  | -0.149778 |
| 18 | 7 | 0 | 3.458614  | -1.348296 | 0.157423  |
| 19 | 6 | 0 | 4.001538  | 2.682977  | -0.369425 |
| 20 | 1 | 0 | 4.649827  | 2.667104  | -1.250300 |
| 21 | 1 | 0 | 3.231922  | 3.451622  | -0.511986 |
| 22 | 1 | 0 | 4.625968  | 2.963134  | 0.483540  |
| 23 | 6 | 0 | 4.125667  | -2.610234 | 0.415857  |
| 24 | 1 | 0 | 3.403807  | -3.422769 | 0.332721  |
| 25 | 1 | 0 | 4.920268  | -2.767059 | -0.314730 |
| 26 | 1 | 0 | 4.561040  | -2.622934 | 1.418011  |
| 27 | 7 | 0 | -4.259297 | -0.005694 | 0.015968  |
| 28 | 8 | 0 | -4.841930 | -0.992497 | -0.398887 |
| 29 | 8 | 0 | -4.831577 | 0.982413  | 0.441951  |

### Structure 36a (C<sub>2</sub>H<sub>5</sub>OH)

Energy (Hartrees): -741.491653891

No imaginary frequencies

Standard orientation:

| Center<br>Number | Atomic<br>Number | Atomic<br>Type | Coordinates (Angstroms) |           |           |
|------------------|------------------|----------------|-------------------------|-----------|-----------|
|                  |                  |                | X                       | Y         | Z         |
| 1                | 6                | 0              | -0.732108               | 1.095193  | 0.460848  |
| 2                | 6                | 0              | -2.113868               | 1.107075  | 0.474969  |
| 3                | 6                | 0              | -2.800578               | -0.007223 | 0.002111  |
| 4                | 6                | 0              | -2.127316               | -1.123186 | -0.488553 |
| 5                | 6                | 0              | -0.746449               | -1.113934 | -0.508789 |
| 6                | 6                | 0              | -0.006670               | -0.012188 | -0.027825 |
| 7                | 1                | 0              | -0.207271               | 1.949791  | 0.869940  |
| 8                | 1                | 0              | -2.654907               | 1.959651  | 0.864599  |
| 9                | 1                | 0              | -2.679957               | -1.972992 | -0.867885 |
| 10               | 1                | 0              | -0.233151               | -1.966949 | -0.936262 |
| 11               | 6                | 0              | 1.457670                | -0.010329 | -0.029045 |
| 12               | 6                | 0              | 2.137778                | -1.207707 | 0.127881  |
| 13               | 6                | 0              | 2.167204                | 1.246612  | -0.181672 |
| 14               | 1                | 0              | 1.577344                | -2.128299 | 0.269215  |
| 15               | 1                | 0              | 1.549309                | 2.131568  | -0.377286 |
| 16               | 1                | 0              | 4.002201                | -0.494078 | 0.067057  |
| 17               | 7                | 0              | 3.443952                | 1.363653  | -0.143728 |
| 18               | 7                | 0              | 3.456008                | -1.351880 | 0.154421  |
| 19               | 6                | 0              | 3.996960                | 2.688507  | -0.360059 |
| 20               | 1                | 0              | 4.646909                | 2.677304  | -1.239678 |
| 21               | 1                | 0              | 3.225451                | 3.454966  | -0.502414 |
| 22               | 1                | 0              | 4.618989                | 2.969234  | 0.494329  |
| 23               | 6                | 0              | 4.119362                | -2.615701 | 0.415368  |
| 24               | 1                | 0              | 3.398794                | -3.427774 | 0.318206  |
| 25               | 1                | 0              | 4.923447                | -2.769124 | -0.305371 |
| 26               | 1                | 0              | 4.541449                | -2.634326 | 1.423108  |
| 27               | 7                | 0              | -4.250913               | -0.005302 | 0.018467  |
| 28               | 8                | 0              | -4.841065               | -0.990799 | -0.393908 |
| 29               | 8                | 0              | -4.829414               | 0.981177  | 0.444773  |

### Structure 36b (vacuum)

Energy (Hartrees): -741.462516754  
No imaginary frequencies

Standard orientation:

| Center<br>Number | Atomic<br>Number | Atomic<br>Type | Coordinates (Angstroms) |           |           |
|------------------|------------------|----------------|-------------------------|-----------|-----------|
|                  |                  |                | X                       | Y         | Z         |
| 1                | 6                | 0              | -0.471703               | -1.091490 | 0.655223  |
| 2                | 6                | 0              | -1.855929               | -1.135725 | 0.685530  |
| 3                | 6                | 0              | -2.567455               | -0.174225 | -0.018198 |
| 4                | 6                | 0              | -1.935297               | 0.813664  | -0.758698 |
| 5                | 6                | 0              | -0.549604               | 0.839020  | -0.783787 |
| 6                | 6                | 0              | 0.211270                | -0.102866 | -0.071935 |
| 7                | 1                | 0              | 0.094906                | -1.821149 | 1.221834  |
| 8                | 1                | 0              | -2.389210               | -1.888609 | 1.250275  |
| 9                | 1                | 0              | -2.527979               | 1.529124  | -1.312738 |
| 10               | 1                | 0              | -0.043582               | 1.574082  | -1.399322 |
| 11               | 6                | 0              | 1.682726                | -0.075591 | -0.095137 |
| 12               | 6                | 0              | 2.411360                | 1.068001  | 0.014357  |
| 13               | 6                | 0              | 2.406689                | -1.351106 | -0.211970 |
| 14               | 1                | 0              | 1.780354                | -2.226259 | -0.443492 |
| 15               | 1                | 0              | 3.492841                | 0.961983  | -0.017642 |
| 16               | 7                | 0              | 3.663370                | -1.465850 | -0.087920 |
| 17               | 7                | 0              | 1.962749                | 2.337087  | 0.167547  |
| 18               | 1                | 0              | 0.982950                | 2.459012  | 0.382653  |
| 19               | 6                | 0              | 2.854265                | 3.409284  | 0.574463  |
| 20               | 1                | 0              | 3.819098                | 3.273034  | 0.085721  |
| 21               | 1                | 0              | 2.444499                | 4.366988  | 0.253996  |
| 22               | 1                | 0              | 3.010729                | 3.433609  | 1.657627  |
| 23               | 6                | 0              | 4.244182                | -2.775811 | -0.289966 |
| 24               | 1                | 0              | 4.939811                | -2.738049 | -1.132412 |
| 25               | 1                | 0              | 4.825461                | -3.054326 | 0.592426  |
| 26               | 1                | 0              | 3.495780                | -3.555973 | -0.485387 |
| 27               | 7                | 0              | -4.039032               | -0.207085 | 0.016227  |
| 28               | 8                | 0              | -4.634715               | 0.666894  | -0.578073 |
| 29               | 8                | 0              | -4.567572               | -1.104578 | 0.637599  |

### Structure 36b (CHCl<sub>3</sub>)

Energy (Hartrees): -741.484109236  
No imaginary frequencies

Standard orientation:

| Center<br>Number | Atomic<br>Number | Atomic<br>Type | Coordinates (Angstroms) |           |           |
|------------------|------------------|----------------|-------------------------|-----------|-----------|
|                  |                  |                | X                       | Y         | Z         |
| 1                | 6                | 0              | -0.486080               | -1.139545 | 0.568506  |
| 2                | 6                | 0              | -1.869107               | -1.180925 | 0.594516  |
| 3                | 6                | 0              | -2.578682               | -0.151276 | -0.012104 |
| 4                | 6                | 0              | -1.938790               | 0.903669  | -0.650980 |
| 5                | 6                | 0              | -0.554785               | 0.925577  | -0.674020 |
| 6                | 6                | 0              | 0.206134                | -0.086867 | -0.059919 |
| 7                | 1                | 0              | 0.070614                | -1.926971 | 1.063136  |
| 8                | 1                | 0              | -2.395475               | -1.987121 | 1.088384  |
| 9                | 1                | 0              | -2.518033               | 1.677689  | -1.136894 |
| 10               | 1                | 0              | -0.055724               | 1.718361  | -1.219082 |
| 11               | 6                | 0              | 1.673969                | -0.077542 | -0.089964 |
| 12               | 6                | 0              | 2.435933                | 1.056416  | 0.015142  |
| 13               | 6                | 0              | 2.372766                | -1.361698 | -0.221767 |
| 14               | 1                | 0              | 1.742418                | -2.208753 | -0.527792 |
| 15               | 1                | 0              | 3.513252                | 0.927525  | -0.052908 |
| 16               | 7                | 0              | 3.619807                | -1.526218 | -0.031412 |
| 17               | 7                | 0              | 2.039024                | 2.322884  | 0.209356  |
| 18               | 1                | 0              | 1.069197                | 2.499766  | 0.434582  |
| 19               | 6                | 0              | 2.976292                | 3.400549  | 0.480505  |
| 20               | 1                | 0              | 3.918955                | 3.189097  | -0.023929 |



|    |   |   |           |           |           |
|----|---|---|-----------|-----------|-----------|
| 21 | 1 | 0 | 2.578098  | 4.337548  | 0.091030  |
| 22 | 1 | 0 | 3.164648  | 3.512934  | 1.552223  |
| 23 | 6 | 0 | 4.166040  | -2.845618 | -0.280419 |
| 24 | 1 | 0 | 4.921660  | -2.786147 | -1.069163 |
| 25 | 1 | 0 | 4.672652  | -3.206299 | 0.619033  |
| 26 | 1 | 0 | 3.405188  | -3.578659 | -0.578824 |
| 27 | 7 | 0 | -4.041276 | -0.182951 | 0.014464  |
| 28 | 8 | 0 | -4.643985 | 0.748838  | -0.483845 |
| 29 | 8 | 0 | -4.585074 | -1.139015 | 0.533391  |

### Structure 36b (DMSO)

Energy (Hartrees): -741.482294713

No imaginary frequencies

Standard orientation:

| Center<br>Number | Atomic<br>Number | Atomic<br>Type | Coordinates (Angstroms) |           |           |
|------------------|------------------|----------------|-------------------------|-----------|-----------|
|                  |                  |                | X                       | Y         | Z         |
| 1                | 6                | 0              | -0.488024               | -1.150267 | 0.547208  |
| 2                | 6                | 0              | -1.870624               | -1.190900 | 0.571286  |
| 3                | 6                | 0              | -2.580227               | -0.147147 | -0.012038 |
| 4                | 6                | 0              | -1.937605               | 0.921837  | -0.625848 |
| 5                | 6                | 0              | -0.554033               | 0.943355  | -0.647944 |
| 6                | 6                | 0              | 0.206989                | -0.084313 | -0.057685 |
| 7                | 1                | 0              | 0.064941                | -1.949825 | 1.026277  |
| 8                | 1                | 0              | -2.393935               | -2.008836 | 1.048975  |
| 9                | 1                | 0              | -2.511426               | 1.710376  | -1.094768 |
| 10               | 1                | 0              | -0.059389               | 1.751271  | -1.174235 |
| 11               | 6                | 0              | 1.673415                | -0.078856 | -0.086391 |
| 12               | 6                | 0              | 2.443395                | 1.055453  | 0.023698  |
| 13               | 6                | 0              | 2.366576                | -1.363307 | -0.218712 |
| 14               | 1                | 0              | 1.735187                | -2.207000 | -0.530271 |
| 15               | 1                | 0              | 3.519819                | 0.923682  | -0.052763 |
| 16               | 7                | 0              | 3.613349                | -1.539374 | -0.022172 |
| 17               | 7                | 0              | 2.057551                | 2.314899  | 0.238288  |
| 18               | 1                | 0              | 1.083393                | 2.508877  | 0.431829  |
| 19               | 6                | 0              | 2.989398                | 3.411738  | 0.442063  |
| 20               | 1                | 0              | 3.982332                | 3.098417  | 0.121490  |
| 21               | 1                | 0              | 2.684681                | 4.276029  | -0.149705 |
| 22               | 1                | 0              | 3.029373                | 3.700122  | 1.495421  |
| 23               | 6                | 0              | 4.146896                | -2.864138 | -0.278546 |
| 24               | 1                | 0              | 4.902753                | -2.809944 | -1.067896 |
| 25               | 1                | 0              | 4.650102                | -3.235860 | 0.618661  |
| 26               | 1                | 0              | 3.377468                | -3.586500 | -0.579840 |
| 27               | 7                | 0              | -4.040464               | -0.179021 | 0.012962  |
| 28               | 8                | 0              | -4.645208               | 0.766235  | -0.460179 |
| 29               | 8                | 0              | -4.586704               | -1.149620 | 0.505271  |

### Structure 36b (C<sub>2</sub>H<sub>5</sub>OH)

Energy (Hartrees): -741.484265752

No imaginary frequencies

Standard orientation:

| Center<br>Number | Atomic<br>Number | Atomic<br>Type | Coordinates (Angstroms) |           |           |
|------------------|------------------|----------------|-------------------------|-----------|-----------|
|                  |                  |                | X                       | Y         | Z         |
| 1                | 6                | 0              | -0.484263               | -1.157305 | 0.526141  |
| 2                | 6                | 0              | -1.865785               | -1.199398 | 0.556113  |
| 3                | 6                | 0              | -2.578264               | -0.149239 | -0.014025 |
| 4                | 6                | 0              | -1.939215               | 0.925896  | -0.622693 |
| 5                | 6                | 0              | -0.556659               | 0.948113  | -0.650452 |

|    |   |   |           |           |           |
|----|---|---|-----------|-----------|-----------|
| 6  | 6 | 0 | 0.207863  | -0.083876 | -0.070653 |
| 7  | 1 | 0 | 0.071643  | -1.959630 | 0.997220  |
| 8  | 1 | 0 | -2.385783 | -2.021759 | 1.030007  |
| 9  | 1 | 0 | -2.515387 | 1.717356  | -1.084030 |
| 10 | 1 | 0 | -0.065059 | 1.759025  | -1.174683 |
| 11 | 6 | 0 | 1.672624  | -0.076021 | -0.098563 |
| 12 | 6 | 0 | 2.442019  | 1.058773  | 0.015326  |
| 13 | 6 | 0 | 2.366484  | -1.360532 | -0.228155 |
| 14 | 1 | 0 | 1.741587  | -2.197524 | -0.569079 |
| 15 | 1 | 0 | 3.518439  | 0.927689  | -0.058869 |
| 16 | 7 | 0 | 3.606553  | -1.543629 | 0.002040  |
| 17 | 7 | 0 | 2.056202  | 2.317848  | 0.232667  |
| 18 | 1 | 0 | 1.081628  | 2.511229  | 0.424455  |
| 19 | 6 | 0 | 2.989022  | 3.412301  | 0.447754  |
| 20 | 1 | 0 | 3.981557  | 3.103387  | 0.121759  |
| 21 | 1 | 0 | 2.683316  | 4.283577  | -0.133207 |
| 22 | 1 | 0 | 3.030700  | 3.688322  | 1.504431  |
| 23 | 6 | 0 | 4.139610  | -2.867433 | -0.262938 |
| 24 | 1 | 0 | 4.915641  | -2.804619 | -1.031546 |
| 25 | 1 | 0 | 4.617749  | -3.257247 | 0.639943  |
| 26 | 1 | 0 | 3.375587  | -3.580688 | -0.596675 |
| 27 | 7 | 0 | -4.032490 | -0.178841 | 0.020838  |
| 28 | 8 | 0 | -4.644113 | 0.775508  | -0.427987 |
| 29 | 8 | 0 | -4.583898 | -1.156063 | 0.497279  |

### Structure 36c (vacuum)

Energy (Hartrees): -741.464282981

No imaginary frequencies

Standard orientation:

| Center<br>Number | Atomic<br>Number | Atomic<br>Type | Coordinates (Angstroms) |           |           |
|------------------|------------------|----------------|-------------------------|-----------|-----------|
|                  |                  |                | X                       | Y         | Z         |
| 1                | 6                | 0              | 0.286573                | 0.913082  | 0.777978  |
| 2                | 6                | 0              | 1.671678                | 0.914222  | 0.809115  |
| 3                | 6                | 0              | 2.358229                | 0.025249  | -0.006306 |
| 4                | 6                | 0              | 1.706211                | -0.852344 | -0.857293 |
| 5                | 6                | 0              | 0.318786                | -0.841216 | -0.876094 |
| 6                | 6                | 0              | -0.411540               | 0.027525  | -0.053811 |
| 7                | 1                | 0              | -0.268821               | 1.608740  | 1.391539  |
| 8                | 1                | 0              | 2.225213                | 1.587241  | 1.449817  |
| 9                | 1                | 0              | 2.282012                | -1.513030 | -1.491197 |
| 10               | 1                | 0              | -0.209798               | -1.496016 | -1.560117 |
| 11               | 6                | 0              | -1.889951               | 0.004430  | -0.071018 |
| 12               | 6                | 0              | -2.597945               | -1.152178 | 0.005400  |
| 13               | 6                | 0              | -2.657368               | 1.246664  | -0.155518 |
| 14               | 1                | 0              | -3.683908               | -1.092359 | -0.018708 |
| 15               | 1                | 0              | -3.751043               | 1.111018  | -0.185324 |
| 16               | 7                | 0              | -2.139936               | 2.402803  | -0.198070 |
| 17               | 7                | 0              | -2.120784               | -2.423260 | 0.100231  |
| 18               | 1                | 0              | -1.135650               | -2.518965 | 0.305029  |
| 19               | 6                | 0              | -3.035256               | 3.535935  | -0.295673 |
| 20               | 1                | 0              | -2.801949               | 4.100669  | -1.201583 |
| 21               | 1                | 0              | -4.096616               | 3.251759  | -0.317066 |
| 22               | 1                | 0              | -2.866025               | 4.206544  | 0.550535  |
| 23               | 6                | 0              | -2.980112               | -3.504514 | 0.550290  |
| 24               | 1                | 0              | -3.936844               | -3.442635 | 0.029639  |
| 25               | 1                | 0              | -2.521588               | -4.459363 | 0.295728  |
| 26               | 1                | 0              | -3.164624               | -3.476545 | 1.629539  |
| 27               | 7                | 0              | 3.832343                | 0.018930  | 0.027236  |
| 28               | 8                | 0              | 4.406801                | -0.802932 | -0.655875 |
| 29               | 8                | 0              | 4.382256                | 0.833244  | 0.737620  |

### Structure 36c (CHCl<sub>3</sub>)

Energy (Hartrees): -741.486384992  
No imaginary frequencies

Standard orientation:

| Center<br>Number | Atomic<br>Number | Atomic<br>Type | Coordinates (Angstroms) |           |           |
|------------------|------------------|----------------|-------------------------|-----------|-----------|
|                  |                  |                | X                       | Y         | Z         |
| 1                | 6                | 0              | 0.304674                | 0.914199  | 0.785672  |
| 2                | 6                | 0              | 1.689023                | 0.914767  | 0.812068  |
| 3                | 6                | 0              | 2.370847                | 0.021957  | -0.005877 |
| 4                | 6                | 0              | 1.711444                | -0.858906 | -0.850494 |
| 5                | 6                | 0              | 0.324737                | -0.844730 | -0.864383 |
| 6                | 6                | 0              | -0.402681               | 0.029388  | -0.042715 |
| 7                | 1                | 0              | -0.241286               | 1.603915  | 1.415274  |
| 8                | 1                | 0              | 2.237577                | 1.588716  | 1.456549  |
| 9                | 1                | 0              | 2.274334                | -1.527203 | -1.488397 |
| 10               | 1                | 0              | -0.201690               | -1.506197 | -1.543654 |
| 11               | 6                | 0              | -1.879888               | 0.013710  | -0.049752 |
| 12               | 6                | 0              | -2.601547               | -1.143389 | 0.035319  |
| 13               | 6                | 0              | -2.647065               | 1.251304  | -0.131917 |
| 14               | 1                | 0              | -3.686684               | -1.066294 | 0.026332  |
| 15               | 1                | 0              | -3.738978               | 1.112610  | -0.115075 |
| 16               | 7                | 0              | -2.141538               | 2.414109  | -0.231624 |
| 17               | 7                | 0              | -2.147103               | -2.408857 | 0.132694  |
| 18               | 1                | 0              | -1.157386               | -2.548771 | 0.288000  |
| 19               | 6                | 0              | -3.058742               | 3.533813  | -0.314880 |
| 20               | 1                | 0              | -2.874925               | 4.087262  | -1.240011 |
| 21               | 1                | 0              | -4.114942               | 3.233475  | -0.288008 |
| 22               | 1                | 0              | -2.868908               | 4.224594  | 0.511593  |
| 23               | 6                | 0              | -3.022666               | -3.508959 | 0.500939  |
| 24               | 1                | 0              | -3.995509               | -3.367641 | 0.028471  |
| 25               | 1                | 0              | -2.599418               | -4.445295 | 0.138235  |
| 26               | 1                | 0              | -3.162328               | -3.578316 | 1.584307  |
| 27               | 7                | 0              | 3.837769                | 0.012567  | 0.021385  |
| 28               | 8                | 0              | 4.417082                | -0.823841 | -0.644173 |
| 29               | 8                | 0              | 4.402597                | 0.839528  | 0.709837  |

### Structure 36c (DMSO)

Energy (Hartrees): -741.485374044  
No imaginary frequencies

Standard orientation:

| Center<br>Number | Atomic<br>Number | Atomic<br>Type | Coordinates (Angstroms) |           |           |
|------------------|------------------|----------------|-------------------------|-----------|-----------|
|                  |                  |                | X                       | Y         | Z         |
| 1                | 6                | 0              | 0.312802                | 0.913188  | 0.794622  |
| 2                | 6                | 0              | 1.696861                | 0.913077  | 0.814767  |
| 3                | 6                | 0              | 2.374322                | 0.017023  | -0.004564 |
| 4                | 6                | 0              | 1.708797                | -0.867473 | -0.841282 |
| 5                | 6                | 0              | 0.322100                | -0.850858 | -0.850356 |
| 6                | 6                | 0              | -0.401240               | 0.028731  | -0.030408 |
| 7                | 1                | 0              | -0.228030               | 1.599612  | 1.433129  |
| 8                | 1                | 0              | 2.245923                | 1.586434  | 1.459658  |
| 9                | 1                | 0              | 2.263623                | -1.542497 | -1.479334 |
| 10               | 1                | 0              | -0.205430               | -1.517912 | -1.523449 |
| 11               | 6                | 0              | -1.876974               | 0.021823  | -0.029532 |
| 12               | 6                | 0              | -2.609411               | -1.134139 | 0.063609  |
| 13               | 6                | 0              | -2.637784               | 1.259033  | -0.113975 |
| 14               | 1                | 0              | -3.693776               | -1.046475 | 0.066691  |
| 15               | 1                | 0              | -3.728495               | 1.127063  | -0.061189 |
| 16               | 7                | 0              | -2.133271               | 2.420955  | -0.258972 |
| 17               | 7                | 0              | -2.164159               | -2.394258 | 0.161829  |
| 18               | 1                | 0              | -1.170102               | -2.555481 | 0.262726  |
| 19               | 6                | 0              | -3.056815               | 3.538254  | -0.332646 |
| 20               | 1                | 0              | -2.903563               | 4.081061  | -1.269977 |

|    |   |   |           |           |           |
|----|---|---|-----------|-----------|-----------|
| 21 | 1 | 0 | -4.109737 | 3.232681  | -0.272310 |
| 22 | 1 | 0 | -2.849376 | 4.240972  | 0.479988  |
| 23 | 6 | 0 | -3.037792 | -3.518164 | 0.454083  |
| 24 | 1 | 0 | -4.051016 | -3.274060 | 0.134791  |
| 25 | 1 | 0 | -2.700927 | -4.398364 | -0.094140 |
| 26 | 1 | 0 | -3.049093 | -3.749245 | 1.522965  |
| 27 | 7 | 0 | 3.839659  | 0.007451  | 0.014962  |
| 28 | 8 | 0 | 4.416773  | -0.849034 | -0.628303 |
| 29 | 8 | 0 | 4.410127  | 0.855810  | 0.674530  |

### Structure 36c (C<sub>2</sub>H<sub>5</sub>OH)

Energy (Hartrees): -741.486948026

No imaginary frequencies

Standard orientation:

| Center<br>Number | Atomic<br>Number | Atomic<br>Type | Coordinates (Angstroms) |           |           |
|------------------|------------------|----------------|-------------------------|-----------|-----------|
|                  |                  |                | X                       | Y         | Z         |
| 1                | 6                | 0              | 0.314655                | 0.888039  | 0.824362  |
| 2                | 6                | 0              | 1.698429                | 0.886223  | 0.845772  |
| 3                | 6                | 0              | 2.374797                | 0.016026  | -0.002370 |
| 4                | 6                | 0              | 1.709525                | -0.844307 | -0.865048 |
| 5                | 6                | 0              | 0.323387                | -0.829697 | -0.869882 |
| 6                | 6                | 0              | -0.398790               | 0.027755  | -0.025728 |
| 7                | 1                | 0              | -0.225532               | 1.555876  | 1.482819  |
| 8                | 1                | 0              | 2.247071                | 1.540551  | 1.510317  |
| 9                | 1                | 0              | 2.263722                | -1.500161 | -1.523403 |
| 10               | 1                | 0              | -0.205704               | -1.479217 | -1.558482 |
| 11               | 6                | 0              | -1.874880               | 0.021496  | -0.029171 |
| 12               | 6                | 0              | -2.605932               | -1.134522 | 0.055806  |
| 13               | 6                | 0              | -2.635583               | 1.258736  | -0.117697 |
| 14               | 1                | 0              | -3.690527               | -1.048711 | 0.048461  |
| 15               | 1                | 0              | -3.726306               | 1.123812  | -0.077535 |
| 16               | 7                | 0              | -2.133129               | 2.422537  | -0.254578 |
| 17               | 7                | 0              | -2.160504               | -2.396421 | 0.156288  |
| 18               | 1                | 0              | -1.169150               | -2.555299 | 0.283731  |
| 19               | 6                | 0              | -3.064818               | 3.533224  | -0.339742 |
| 20               | 1                | 0              | -2.906252               | 4.075389  | -1.276372 |
| 21               | 1                | 0              | -4.115891               | 3.220612  | -0.289730 |
| 22               | 1                | 0              | -2.871333               | 4.239703  | 0.472756  |
| 23               | 6                | 0              | -3.044820               | -3.508950 | 0.463012  |
| 24               | 1                | 0              | -4.019881               | -3.329556 | 0.009013  |
| 25               | 1                | 0              | -2.631586               | -4.425926 | 0.043568  |
| 26               | 1                | 0              | -3.174183               | -3.640174 | 1.541502  |
| 27               | 7                | 0              | 3.836420                | 0.008908  | 0.012511  |
| 28               | 8                | 0              | 4.419618                | -0.764232 | -0.725167 |
| 29               | 8                | 0              | 4.411660                | 0.775957  | 0.762408  |

### Structure 36d (vacuum)

Energy (Hartrees): -741.459254655

No imaginary frequencies

Standard orientation:

| Center<br>Number | Atomic<br>Number | Atomic<br>Type | Coordinates (Angstroms) |           |           |
|------------------|------------------|----------------|-------------------------|-----------|-----------|
|                  |                  |                | X                       | Y         | Z         |
| 1                | 6                | 0              | -0.544886               | 0.891084  | 0.672961  |
| 2                | 6                | 0              | -1.927946               | 0.847942  | 0.706449  |
| 3                | 6                | 0              | -2.583016               | -0.165433 | 0.018679  |
| 4                | 6                | 0              | -1.895414               | -1.124191 | -0.707152 |
| 5                | 6                | 0              | -0.510048               | -1.062329 | -0.735319 |

|    |   |   |           |           |           |
|----|---|---|-----------|-----------|-----------|
| 6  | 6 | 0 | 0.191092  | -0.071867 | -0.033648 |
| 7  | 1 | 0 | -0.022233 | 1.677523  | 1.198983  |
| 8  | 1 | 0 | -2.503857 | 1.579232  | 1.257030  |
| 9  | 1 | 0 | -2.442925 | -1.884555 | -1.247357 |
| 10 | 1 | 0 | 0.037893  | -1.778614 | -1.335905 |
| 11 | 6 | 0 | 1.669602  | -0.068344 | -0.021104 |
| 12 | 6 | 0 | 2.321201  | -1.259470 | 0.075791  |
| 13 | 6 | 0 | 2.416637  | 1.186701  | -0.099349 |
| 14 | 1 | 0 | 3.502258  | 1.118446  | 0.077479  |
| 15 | 1 | 0 | 4.277786  | -0.726583 | -0.145373 |
| 16 | 1 | 0 | 1.731343  | -2.159716 | 0.232431  |
| 17 | 7 | 0 | 1.890512  | 2.315111  | -0.340754 |
| 18 | 7 | 0 | 3.655495  | -1.509464 | -0.024550 |
| 19 | 6 | 0 | 2.759916  | 3.470613  | -0.377336 |
| 20 | 1 | 0 | 3.814844  | 3.230156  | -0.183842 |
| 21 | 1 | 0 | 2.676905  | 3.947897  | -1.356740 |
| 22 | 1 | 0 | 2.421534  | 4.200876  | 0.362049  |
| 23 | 6 | 0 | 4.234539  | -2.713940 | 0.542718  |
| 24 | 1 | 0 | 3.585889  | -3.561846 | 0.316246  |
| 25 | 1 | 0 | 5.204942  | -2.900199 | 0.083598  |
| 26 | 1 | 0 | 4.360861  | -2.651767 | 1.628682  |
| 27 | 7 | 0 | -4.054086 | -0.216704 | 0.051821  |
| 28 | 8 | 0 | -4.600472 | -1.122986 | -0.542360 |
| 29 | 8 | 0 | -4.634372 | 0.648231  | 0.673729  |

### Structure 36d (CHCl<sub>3</sub>)

Energy (Hartrees): -741.483020791

No imaginary frequencies

Standard orientation:

| Center<br>Number | Atomic<br>Number | Atomic<br>Type | Coordinates (Angstroms) |           |           |
|------------------|------------------|----------------|-------------------------|-----------|-----------|
|                  |                  |                | X                       | Y         | Z         |
| 1                | 6                | 0              | -0.559073               | 0.943501  | 0.608133  |
| 2                | 6                | 0              | -1.941239               | 0.903766  | 0.636824  |
| 3                | 6                | 0              | -2.595565               | -0.154696 | 0.014766  |
| 4                | 6                | 0              | -1.899670               | -1.161254 | -0.640503 |
| 5                | 6                | 0              | -0.516064               | -1.101090 | -0.666923 |
| 6                | 6                | 0              | 0.187501                | -0.064211 | -0.029134 |
| 7                | 1                | 0              | -0.044266               | 1.759724  | 1.095877  |
| 8                | 1                | 0              | -2.510016               | 1.674076  | 1.140609  |
| 9                | 1                | 0              | -2.434455               | -1.960791 | -1.135895 |
| 10               | 1                | 0              | 0.028413                | -1.861825 | -1.213624 |
| 11               | 6                | 0              | 1.660749                | -0.060109 | -0.003248 |
| 12               | 6                | 0              | 2.312286                | -1.262199 | 0.100087  |
| 13               | 6                | 0              | 2.423515                | 1.184177  | -0.056052 |
| 14               | 1                | 0              | 3.487304                | 1.108336  | 0.214283  |
| 15               | 1                | 0              | 4.270792                | -0.745911 | -0.157653 |
| 16               | 1                | 0              | 1.722180                | -2.160573 | 0.266171  |
| 17               | 7                | 0              | 1.939265                | 2.315800  | -0.377937 |
| 18               | 7                | 0              | 3.632863                | -1.508735 | 0.016205  |
| 19               | 6                | 0              | 2.833557                | 3.455737  | -0.357537 |
| 20               | 1                | 0              | 3.865739                | 3.194488  | -0.087933 |
| 21               | 1                | 0              | 2.833384                | 3.931977  | -1.341646 |
| 22               | 1                | 0              | 2.460564                | 4.197805  | 0.354234  |
| 23               | 6                | 0              | 4.215346                | -2.760178 | 0.468230  |
| 24               | 1                | 0              | 3.495898                | -3.564975 | 0.310376  |
| 25               | 1                | 0              | 5.110805                | -2.977933 | -0.113572 |
| 26               | 1                | 0              | 4.479430                | -2.729241 | 1.529537  |
| 27               | 7                | 0              | -4.057073               | -0.205253 | 0.044070  |
| 28               | 8                | 0              | -4.610372               | -1.150542 | -0.486134 |
| 29               | 8                | 0              | -4.652030               | 0.698228  | 0.600511  |

### Structure 36d (DMSO)

Energy (Hartrees): -741.482698445  
No imaginary frequencies

Standard orientation:

| Center<br>Number | Atomic<br>Number | Atomic<br>Type | Coordinates (Angstroms) |           |           |
|------------------|------------------|----------------|-------------------------|-----------|-----------|
|                  |                  |                | X                       | Y         | Z         |
| 1                | 6                | 0              | -0.566674               | 0.946441  | 0.608857  |
| 2                | 6                | 0              | -1.948618               | 0.907315  | 0.627012  |
| 3                | 6                | 0              | -2.599024               | -0.161652 | 0.017387  |
| 4                | 6                | 0              | -1.895263               | -1.182400 | -0.609217 |
| 5                | 6                | 0              | -0.511899               | -1.123898 | -0.625175 |
| 6                | 6                | 0              | 0.188342                | -0.071546 | -0.005614 |
| 7                | 1                | 0              | -0.058352               | 1.768839  | 1.093562  |
| 8                | 1                | 0              | -2.517925               | 1.686914  | 1.115940  |
| 9                | 1                | 0              | -2.421990               | -1.994403 | -1.093158 |
| 10               | 1                | 0              | 0.034260                | -1.899706 | -1.148833 |
| 11               | 6                | 0              | 1.658500                | -0.055711 | 0.022473  |
| 12               | 6                | 0              | 2.323410                | -1.256957 | 0.122898  |
| 13               | 6                | 0              | 2.412810                | 1.191558  | -0.037325 |
| 14               | 1                | 0              | 3.472012                | 1.128702  | 0.248965  |
| 15               | 1                | 0              | 4.274177                | -0.715886 | -0.130431 |
| 16               | 1                | 0              | 1.742229                | -2.162269 | 0.282539  |
| 17               | 7                | 0              | 1.928018                | 2.315783  | -0.391792 |
| 18               | 7                | 0              | 3.640551                | -1.483164 | 0.046946  |
| 19               | 6                | 0              | 2.820888                | 3.459027  | -0.375739 |
| 20               | 1                | 0              | 3.849105                | 3.200076  | -0.091679 |
| 21               | 1                | 0              | 2.833164                | 3.923200  | -1.365849 |
| 22               | 1                | 0              | 2.440743                | 4.209702  | 0.323580  |
| 23               | 6                | 0              | 4.242752                | -2.755711 | 0.404908  |
| 24               | 1                | 0              | 3.500540                | -3.545999 | 0.288173  |
| 25               | 1                | 0              | 5.082454                | -2.960880 | -0.259133 |
| 26               | 1                | 0              | 4.598954                | -2.755335 | 1.438686  |
| 27               | 7                | 0              | -4.058266               | -0.208234 | 0.030710  |
| 28               | 8                | 0              | -4.609969               | -1.161069 | -0.490402 |
| 29               | 8                | 0              | -4.659136               | 0.707013  | 0.564629  |

### Structure 36d (C<sub>2</sub>H<sub>5</sub>OH)

Energy (Hartrees): -741.484488053  
No imaginary frequencies

Standard orientation:

| Center<br>Number | Atomic<br>Number | Atomic<br>Type | Coordinates (Angstroms) |           |           |
|------------------|------------------|----------------|-------------------------|-----------|-----------|
|                  |                  |                | X                       | Y         | Z         |
| 1                | 6                | 0              | -0.567901               | 0.953557  | 0.599899  |
| 2                | 6                | 0              | -1.948881               | 0.916797  | 0.620668  |
| 3                | 6                | 0              | -2.601768               | -0.153503 | 0.013767  |
| 4                | 6                | 0              | -1.900845               | -1.175811 | -0.615560 |
| 5                | 6                | 0              | -0.518464               | -1.119051 | -0.633611 |
| 6                | 6                | 0              | 0.184385                | -0.067903 | -0.013364 |
| 7                | 1                | 0              | -0.057450               | 1.774996  | 1.084180  |
| 8                | 1                | 0              | -2.515401               | 1.697748  | 1.111011  |
| 9                | 1                | 0              | -2.428624               | -1.986574 | -1.100525 |
| 10               | 1                | 0              | 0.026028                | -1.894038 | -1.160189 |
| 11               | 6                | 0              | 1.652745                | -0.058377 | 0.019098  |
| 12               | 6                | 0              | 2.312145                | -1.262679 | 0.116862  |
| 13               | 6                | 0              | 2.415345                | 1.185097  | -0.025789 |
| 14               | 1                | 0              | 3.463008                | 1.117425  | 0.299209  |
| 15               | 1                | 0              | 4.264544                | -0.725328 | -0.133229 |
| 16               | 1                | 0              | 1.728501                | -2.166612 | 0.274953  |
| 17               | 7                | 0              | 1.952130                | 2.309111  | -0.408233 |
| 18               | 7                | 0              | 3.629159                | -1.492532 | 0.038472  |
| 19               | 6                | 0              | 2.856802                | 3.443300  | -0.364825 |
| 20               | 1                | 0              | 3.867947                | 3.176172  | -0.032207 |

|    |   |   |           |           |           |
|----|---|---|-----------|-----------|-----------|
| 21 | 1 | 0 | 2.919712  | 3.896637  | -1.357827 |
| 22 | 1 | 0 | 2.455412  | 4.205875  | 0.308987  |
| 23 | 6 | 0 | 4.226389  | -2.762103 | 0.417257  |
| 24 | 1 | 0 | 3.488404  | -3.554810 | 0.290353  |
| 25 | 1 | 0 | 5.079565  | -2.970889 | -0.228148 |
| 26 | 1 | 0 | 4.561744  | -2.755128 | 1.458025  |
| 27 | 7 | 0 | -4.054832 | -0.200617 | 0.034855  |
| 28 | 8 | 0 | -4.615144 | -1.159236 | -0.469666 |
| 29 | 8 | 0 | -4.659644 | 0.718841  | 0.560083  |

### Structure 36e (vacuum)

Energy (Hartrees): -741.456293393  
No imaginary frequencies

Standard orientation:

| Center<br>Number | Atomic<br>Number | Atomic<br>Type | Coordinates (Angstroms) |           |           |
|------------------|------------------|----------------|-------------------------|-----------|-----------|
|                  |                  |                | X                       | Y         | Z         |
| 1                | 6                | 0              | 0.538974                | 0.879056  | -0.637636 |
| 2                | 6                | 0              | 1.921019                | 0.938867  | -0.603112 |
| 3                | 6                | 0              | 2.621524                | -0.098793 | -0.001018 |
| 4                | 6                | 0              | 1.978703                | -1.183708 | 0.570881  |
| 5                | 6                | 0              | 0.592251                | -1.224749 | 0.530959  |
| 6                | 6                | 0              | -0.152141               | -0.211093 | -0.087345 |
| 7                | 1                | 0              | -0.017117               | 1.682195  | -1.100059 |
| 8                | 1                | 0              | 2.462530                | 1.768294  | -1.037359 |
| 9                | 1                | 0              | 2.557883                | -1.961554 | 1.049676  |
| 10               | 1                | 0              | 0.075032                | -2.045213 | 1.014300  |
| 11               | 6                | 0              | -1.625914               | -0.319016 | -0.184972 |
| 12               | 6                | 0              | -2.146384               | -1.541078 | -0.489331 |
| 13               | 6                | 0              | -2.460610               | 0.877964  | -0.041126 |
| 14               | 1                | 0              | -3.494879               | 0.792516  | -0.396691 |
| 15               | 1                | 0              | -3.583946               | -2.901479 | -0.830706 |
| 16               | 1                | 0              | -1.447341               | -2.320875 | -0.779902 |
| 17               | 7                | 0              | -2.029974               | 1.980840  | 0.415466  |
| 18               | 7                | 0              | -3.440755               | -1.964964 | -0.494920 |
| 19               | 6                | 0              | -2.954958               | 3.092697  | 0.458675  |
| 20               | 1                | 0              | -3.034474               | 3.452139  | 1.487498  |
| 21               | 1                | 0              | -2.556608               | 3.918868  | -0.135958 |
| 22               | 1                | 0              | -3.958744               | 2.840599  | 0.088650  |
| 23               | 6                | 0              | -4.539456               | -1.384215 | 0.255788  |
| 24               | 1                | 0              | -4.149737               | -0.881487 | 1.144178  |
| 25               | 1                | 0              | -5.119696               | -0.666893 | -0.329603 |
| 26               | 1                | 0              | -5.208315               | -2.184014 | 0.574972  |
| 27               | 7                | 0              | 4.092309                | -0.039470 | 0.040755  |
| 28               | 8                | 0              | 4.678233                | -0.954336 | 0.581647  |
| 29               | 8                | 0              | 4.632555                | 0.918895  | -0.470234 |

### Structure 36e (CHCl<sub>3</sub>)

Energy (Hartrees): -741.479981810  
No imaginary frequencies

Standard orientation:

| Center<br>Number | Atomic<br>Number | Atomic<br>Type | Coordinates (Angstroms) |           |           |
|------------------|------------------|----------------|-------------------------|-----------|-----------|
|                  |                  |                | X                       | Y         | Z         |
| 1                | 6                | 0              | 0.538128                | 0.868876  | -0.637796 |
| 2                | 6                | 0              | 1.919159                | 0.932499  | -0.613127 |
| 3                | 6                | 0              | 2.626904                | -0.099399 | -0.004652 |
| 4                | 6                | 0              | 1.986671                | -1.183029 | 0.578480  |
| 5                | 6                | 0              | 0.601129                | -1.226781 | 0.548819  |
| 6                | 6                | 0              | -0.152453               | -0.216937 | -0.070913 |
| 7                | 1                | 0              | -0.017455               | 1.663520  | -1.116464 |

|    |   |   |           |           |           |
|----|---|---|-----------|-----------|-----------|
| 8  | 1 | 0 | 2.447828  | 1.760829  | -1.065822 |
| 9  | 1 | 0 | 2.561093  | -1.962508 | 1.061302  |
| 10 | 1 | 0 | 0.092799  | -2.049131 | 1.038535  |
| 11 | 6 | 0 | -1.624996 | -0.319193 | -0.155622 |
| 12 | 6 | 0 | -2.148600 | -1.558946 | -0.420374 |
| 13 | 6 | 0 | -2.450463 | 0.882434  | -0.028687 |
| 14 | 1 | 0 | -3.481684 | 0.804105  | -0.386995 |
| 15 | 1 | 0 | -3.547051 | -2.954913 | -0.722144 |
| 16 | 1 | 0 | -1.443836 | -2.346382 | -0.673800 |
| 17 | 7 | 0 | -2.021765 | 1.988255  | 0.433488  |
| 18 | 7 | 0 | -3.422983 | -1.999317 | -0.427247 |
| 19 | 6 | 0 | -2.949140 | 3.101544  | 0.458170  |
| 20 | 1 | 0 | -3.034108 | 3.479384  | 1.480718  |
| 21 | 1 | 0 | -2.553180 | 3.919982  | -0.150051 |
| 22 | 1 | 0 | -3.950826 | 2.841320  | 0.090679  |
| 23 | 6 | 0 | -4.593564 | -1.351147 | 0.136147  |
| 24 | 1 | 0 | -4.319468 | -0.803611 | 1.041125  |
| 25 | 1 | 0 | -5.071333 | -0.664194 | -0.566566 |
| 26 | 1 | 0 | -5.313911 | -2.124185 | 0.402622  |
| 27 | 7 | 0 | 4.089108  | -0.036822 | 0.026367  |
| 28 | 8 | 0 | 4.692708  | -0.957684 | 0.543860  |
| 29 | 8 | 0 | 4.632787  | 0.931613  | -0.469368 |

### Structure 36e (DMSO)

Energy (Hartrees): -741.479651528

No imaginary frequencies

Standard orientation:

| Center<br>Number | Atomic<br>Number | Atomic<br>Type | Coordinates (Angstroms) |           |           |
|------------------|------------------|----------------|-------------------------|-----------|-----------|
|                  |                  |                | X                       | Y         | Z         |
| 1                | 6                | 0              | 0.538054                | 0.873050  | -0.628511 |
| 2                | 6                | 0              | 1.918767                | 0.938893  | -0.603080 |
| 3                | 6                | 0              | 2.629455                | -0.098482 | -0.005935 |
| 4                | 6                | 0              | 1.989528                | -1.191151 | 0.562228  |
| 5                | 6                | 0              | 0.604432                | -1.236771 | 0.533852  |
| 6                | 6                | 0              | -0.153309               | -0.219485 | -0.071663 |
| 7                | 1                | 0              | -0.016150               | 1.670209  | -1.105265 |
| 8                | 1                | 0              | 2.442822                | 1.773347  | -1.050201 |
| 9                | 1                | 0              | 2.561378                | -1.978674 | 1.035162  |
| 10               | 1                | 0              | 0.100706                | -2.069038 | 1.011375  |
| 11               | 6                | 0              | -1.624036               | -0.320296 | -0.152354 |
| 12               | 6                | 0              | -2.149491               | -1.566284 | -0.407146 |
| 13               | 6                | 0              | -2.449716               | 0.880222  | -0.033072 |
| 14               | 1                | 0              | -3.476044               | 0.805404  | -0.403964 |
| 15               | 1                | 0              | -3.542744               | -2.964621 | -0.690107 |
| 16               | 1                | 0              | -1.446470               | -2.356992 | -0.655366 |
| 17               | 7                | 0              | -2.027632               | 1.986344  | 0.440018  |
| 18               | 7                | 0              | -3.418146               | -2.004283 | -0.406666 |
| 19               | 6                | 0              | -2.956568               | 3.100477  | 0.446757  |
| 20               | 1                | 0              | -3.051830               | 3.489210  | 1.464583  |
| 21               | 1                | 0              | -2.557313               | 3.913077  | -0.167741 |
| 22               | 1                | 0              | -3.953761               | 2.833625  | 0.073424  |
| 23               | 6                | 0              | -4.595132               | -1.342188 | 0.127612  |
| 24               | 1                | 0              | -4.332628               | -0.780731 | 1.027554  |
| 25               | 1                | 0              | -5.056177               | -0.664323 | -0.594311 |
| 26               | 1                | 0              | -5.320997               | -2.110167 | 0.392359  |
| 27               | 7                | 0              | 4.089304                | -0.032733 | 0.027210  |
| 28               | 8                | 0              | 4.697597                | -0.968384 | 0.514539  |
| 29               | 8                | 0              | 4.631480                | 0.954191  | -0.436234 |



### Structure 36e (C<sub>2</sub>H<sub>5</sub>OH)

Energy (Hartrees): -741.481534809  
No imaginary frequencies

Standard orientation:

| Center<br>Number | Atomic<br>Number | Atomic<br>Type | Coordinates (Angstroms) |           |           |
|------------------|------------------|----------------|-------------------------|-----------|-----------|
|                  |                  |                | X                       | Y         | Z         |
| 1                | 6                | 0              | 0.540840                | 0.874522  | -0.631571 |
| 2                | 6                | 0              | 1.920695                | 0.941915  | -0.606775 |
| 3                | 6                | 0              | 2.632017                | -0.095319 | -0.008298 |
| 4                | 6                | 0              | 1.993282                | -1.189877 | 0.559855  |
| 5                | 6                | 0              | 0.609294                | -1.237086 | 0.530286  |
| 6                | 6                | 0              | -0.149340               | -0.219350 | -0.074870 |
| 7                | 1                | 0              | -0.014313               | 1.670892  | -1.108558 |
| 8                | 1                | 0              | 2.442962                | 1.776738  | -1.055395 |
| 9                | 1                | 0              | 2.565254                | -1.976549 | 1.034392  |
| 10               | 1                | 0              | 0.106090                | -2.069110 | 1.008799  |
| 11               | 6                | 0              | -1.618581               | -0.320632 | -0.155261 |
| 12               | 6                | 0              | -2.143303               | -1.568189 | -0.403687 |
| 13               | 6                | 0              | -2.447919               | 0.877983  | -0.039906 |
| 14               | 1                | 0              | -3.468179               | 0.800962  | -0.426141 |
| 15               | 1                | 0              | -3.536766               | -2.967996 | -0.682793 |
| 16               | 1                | 0              | -1.440175               | -2.359863 | -0.648260 |
| 17               | 7                | 0              | -2.039335               | 1.982721  | 0.448391  |
| 18               | 7                | 0              | -3.412164               | -2.006627 | -0.402983 |
| 19               | 6                | 0              | -2.982823               | 3.085805  | 0.451909  |
| 20               | 1                | 0              | -3.096216               | 3.464705  | 1.471424  |
| 21               | 1                | 0              | -2.587091               | 3.909572  | -0.149480 |
| 22               | 1                | 0              | -3.971652               | 2.810232  | 0.063799  |
| 23               | 6                | 0              | -4.590464               | -1.339455 | 0.123561  |
| 24               | 1                | 0              | -4.330151               | -0.770420 | 1.019281  |
| 25               | 1                | 0              | -5.051389               | -0.669165 | -0.605418 |
| 26               | 1                | 0              | -5.316728               | -2.104944 | 0.394689  |
| 27               | 7                | 0              | 4.085945                | -0.027670 | 0.028953  |
| 28               | 8                | 0              | 4.699253                | -0.955511 | 0.527969  |
| 29               | 8                | 0              | 4.635128                | 0.953521  | -0.441510 |

### Structure 36f (vacuum)

Energy (Hartrees): -741.454566128  
No imaginary frequencies

Standard orientation:

| Center<br>Number | Atomic<br>Number | Atomic<br>Type | Coordinates (Angstroms) |           |           |
|------------------|------------------|----------------|-------------------------|-----------|-----------|
|                  |                  |                | X                       | Y         | Z         |
| 1                | 6                | 0              | -0.666598               | 0.744407  | 0.856880  |
| 2                | 6                | 0              | -2.048564               | 0.844336  | 0.859293  |
| 3                | 6                | 0              | -2.776786               | 0.017420  | 0.016305  |
| 4                | 6                | 0              | -2.161089               | -0.893344 | -0.829238 |
| 5                | 6                | 0              | -0.777630               | -0.969757 | -0.827653 |
| 6                | 6                | 0              | -0.002039               | -0.165503 | 0.021105  |
| 7                | 1                | 0              | -0.093561               | 1.363002  | 1.537312  |
| 8                | 1                | 0              | -2.567039               | 1.536385  | 1.509141  |
| 9                | 1                | 0              | -2.764281               | -1.507277 | -1.484608 |
| 10               | 1                | 0              | -0.284917               | -1.645364 | -1.517033 |
| 11               | 6                | 0              | 1.479281                | -0.265014 | 0.029772  |
| 12               | 6                | 0              | 2.018577                | -1.517419 | 0.061573  |
| 13               | 6                | 0              | 2.208025                | 1.001860  | -0.097062 |
| 14               | 1                | 0              | 1.320788                | -2.347463 | -0.014274 |
| 15               | 1                | 0              | 1.651328                | 1.896876  | 0.217010  |
| 16               | 1                | 0              | 3.410145                | -2.928787 | 0.271688  |
| 17               | 7                | 0              | 3.355392                | 1.119442  | -0.628613 |
| 18               | 7                | 0              | 3.295176                | -1.930498 | 0.236081  |
| 19               | 6                | 0              | 4.368147                | -1.154943 | 0.834587  |
| 20               | 1                | 0              | 4.822506                | -0.481337 | 0.109649  |

|    |   |   |           |           |           |
|----|---|---|-----------|-----------|-----------|
| 21 | 1 | 0 | 3.976824  | -0.553710 | 1.660613  |
| 22 | 1 | 0 | 5.110132  | -1.851285 | 1.224106  |
| 23 | 6 | 0 | 3.905456  | 2.455846  | -0.733771 |
| 24 | 1 | 0 | 4.137040  | 2.666649  | -1.780489 |
| 25 | 1 | 0 | 3.230973  | 3.234268  | -0.352464 |
| 26 | 1 | 0 | 4.847586  | 2.505989  | -0.180561 |
| 27 | 7 | 0 | -4.245312 | 0.113716  | 0.016689  |
| 28 | 8 | 0 | -4.858905 | -0.626775 | -0.722991 |
| 29 | 8 | 0 | -4.755468 | 0.927538  | 0.757999  |

### Structure 36f (CHCl<sub>3</sub>)

Energy (Hartrees): -741.476347648

No imaginary frequencies

Standard orientation:

| Center<br>Number | Atomic<br>Number | Atomic<br>Type | Coordinates (Angstroms) |           |           |
|------------------|------------------|----------------|-------------------------|-----------|-----------|
|                  |                  |                | X                       | Y         | Z         |
| 1                | 6                | 0              | -0.665934               | 0.793350  | 0.807737  |
| 2                | 6                | 0              | -2.046854               | 0.892881  | 0.810820  |
| 3                | 6                | 0              | -2.780704               | 0.021919  | 0.015284  |
| 4                | 6                | 0              | -2.165839               | -0.933401 | -0.784424 |
| 5                | 6                | 0              | -0.784131               | -1.011357 | -0.783675 |
| 6                | 6                | 0              | -0.001524               | -0.162157 | 0.019007  |
| 7                | 1                | 0              | -0.096342               | 1.450826  | 1.453530  |
| 8                | 1                | 0              | -2.552924               | 1.621430  | 1.430307  |
| 9                | 1                | 0              | -2.762824               | -1.584908 | -1.408954 |
| 10               | 1                | 0              | -0.300725               | -1.727871 | -1.437516 |
| 11               | 6                | 0              | 1.476235                | -0.264335 | 0.029621  |
| 12               | 6                | 0              | 2.020966                | -1.520289 | 0.049249  |
| 13               | 6                | 0              | 2.219849                | 0.995579  | -0.075759 |
| 14               | 1                | 0              | 1.335635                | -2.357726 | -0.050453 |
| 15               | 1                | 0              | 1.720322                | 1.888282  | 0.323992  |
| 16               | 1                | 0              | 3.417873                | -2.921145 | 0.273860  |
| 17               | 7                | 0              | 3.333925                | 1.108808  | -0.679665 |
| 18               | 7                | 0              | 3.292145                | -1.921470 | 0.246390  |
| 19               | 6                | 0              | 4.357701                | -1.142130 | 0.850405  |
| 20               | 1                | 0              | 4.834733                | -0.480828 | 0.127071  |
| 21               | 1                | 0              | 3.959786                | -0.528015 | 1.663822  |
| 22               | 1                | 0              | 5.089782                | -1.838414 | 1.258057  |
| 23               | 6                | 0              | 3.928225                | 2.431213  | -0.731759 |
| 24               | 1                | 0              | 4.147447                | 2.688416  | -1.771212 |
| 25               | 1                | 0              | 3.289134                | 3.210333  | -0.296360 |
| 26               | 1                | 0              | 4.882631                | 2.422859  | -0.196299 |
| 27               | 7                | 0              | -4.240332               | 0.115664  | 0.017246  |
| 28               | 8                | 0              | -4.867212               | -0.672111 | -0.665689 |
| 29               | 8                | 0              | -4.759366               | 0.975627  | 0.703605  |

### Structure 36f (DMSO)

Energy (Hartrees): -741.475278691

No imaginary frequencies

Standard orientation:

| Center<br>Number | Atomic<br>Number | Atomic<br>Type | Coordinates (Angstroms) |           |           |
|------------------|------------------|----------------|-------------------------|-----------|-----------|
|                  |                  |                | X                       | Y         | Z         |
| 1                | 6                | 0              | -0.664302               | 0.832319  | 0.759985  |
| 2                | 6                | 0              | -2.044716               | 0.933861  | 0.760325  |
| 3                | 6                | 0              | -2.784206               | 0.021257  | 0.017703  |
| 4                | 6                | 0              | -2.171360               | -0.981355 | -0.725722 |
| 5                | 6                | 0              | -0.790750               | -1.063758 | -0.722156 |
| 6                | 6                | 0              | -0.001811               | -0.170158 | 0.026970  |

|    |   |   |           |           |           |
|----|---|---|-----------|-----------|-----------|
| 7  | 1 | 0 | -0.096228 | 1.528414  | 1.364465  |
| 8  | 1 | 0 | -2.543985 | 1.700655  | 1.337861  |
| 9  | 1 | 0 | -2.766484 | -1.668642 | -1.312559 |
| 10 | 1 | 0 | -0.314994 | -1.821740 | -1.332977 |
| 11 | 6 | 0 | 1.472947  | -0.271318 | 0.035834  |
| 12 | 6 | 0 | 2.029294  | -1.524488 | 0.042149  |
| 13 | 6 | 0 | 2.226452  | 0.986585  | -0.045381 |
| 14 | 1 | 0 | 1.358328  | -2.371883 | -0.067093 |
| 15 | 1 | 0 | 1.787592  | 1.863771  | 0.446457  |
| 16 | 1 | 0 | 3.444155  | -2.906400 | 0.267411  |
| 17 | 7 | 0 | 3.297932  | 1.108610  | -0.721920 |
| 18 | 7 | 0 | 3.303926  | -1.907588 | 0.240735  |
| 19 | 6 | 0 | 4.360035  | -1.113933 | 0.842129  |
| 20 | 1 | 0 | 4.842592  | -0.458632 | 0.115760  |
| 21 | 1 | 0 | 3.953346  | -0.490824 | 1.644375  |
| 22 | 1 | 0 | 5.093064  | -1.801288 | 1.262373  |
| 23 | 6 | 0 | 3.934842  | 2.413291  | -0.727089 |
| 24 | 1 | 0 | 4.070170  | 2.746944  | -1.759408 |
| 25 | 1 | 0 | 3.367132  | 3.173381  | -0.175858 |
| 26 | 1 | 0 | 4.932316  | 2.330802  | -0.284408 |
| 27 | 7 | 0 | -4.240823 | 0.120717  | 0.013025  |
| 28 | 8 | 0 | -4.872245 | -0.708522 | -0.617168 |
| 29 | 8 | 0 | -4.759356 | 1.027201  | 0.639947  |

### Structure 36f (C<sub>2</sub>H<sub>5</sub>OH)

Energy (Hartrees): -741.477040319

No imaginary frequencies

Standard orientation:

| Center<br>Number | Atomic<br>Number | Atomic<br>Type | Coordinates (Angstroms) |           |           |
|------------------|------------------|----------------|-------------------------|-----------|-----------|
|                  |                  |                | X                       | Y         | Z         |
| 1                | 6                | 0              | -0.663652               | 0.868573  | 0.707963  |
| 2                | 6                | 0              | -2.042644               | 0.971525  | 0.706493  |
| 3                | 6                | 0              | -2.787010               | 0.018098  | 0.020578  |
| 4                | 6                | 0              | -2.176006               | -1.028721 | -0.663656 |
| 5                | 6                | 0              | -0.797102               | -1.113312 | -0.657453 |
| 6                | 6                | 0              | -0.001243               | -0.178325 | 0.035507  |
| 7                | 1                | 0              | -0.098860               | 1.603245  | 1.266904  |
| 8                | 1                | 0              | -2.537551               | 1.773116  | 1.239208  |
| 9                | 1                | 0              | -2.771339               | -1.749138 | -1.209334 |
| 10               | 1                | 0              | -0.328025               | -1.906119 | -1.227210 |
| 11               | 6                | 0              | 1.470368                | -0.278335 | 0.043891  |
| 12               | 6                | 0              | 2.034791                | -1.528458 | 0.041984  |
| 13               | 6                | 0              | 2.232137                | 0.978409  | -0.015214 |
| 14               | 1                | 0              | 1.371557                | -2.381574 | -0.065444 |
| 15               | 1                | 0              | 1.843633                | 1.833535  | 0.551110  |
| 16               | 1                | 0              | 3.461214                | -2.901420 | 0.254573  |
| 17               | 7                | 0              | 3.265042                | 1.120471  | -0.745042 |
| 18               | 7                | 0              | 3.312495                | -1.903818 | 0.231352  |
| 19               | 6                | 0              | 4.376336                | -1.098348 | 0.803001  |
| 20               | 1                | 0              | 4.841666                | -0.448867 | 0.060328  |
| 21               | 1                | 0              | 3.984927                | -0.470291 | 1.608826  |
| 22               | 1                | 0              | 5.122164                | -1.777475 | 1.214017  |
| 23               | 6                | 0              | 3.926346                | 2.413298  | -0.705144 |
| 24               | 1                | 0              | 4.038312                | 2.796355  | -1.722589 |
| 25               | 1                | 0              | 3.389136                | 3.154019  | -0.100099 |
| 26               | 1                | 0              | 4.934029                | 2.292728  | -0.295674 |
| 27               | 7                | 0              | -4.235719               | 0.123444  | 0.008563  |
| 28               | 8                | 0              | -4.877715               | -0.732438 | -0.577001 |
| 29               | 8                | 0              | -4.756974               | 1.064285  | 0.583698  |

### Structure 37a (vacuum)

Energy (Hartrees): -1028.28229859  
No imaginary frequencies

Standard orientation:

| Center<br>Number | Atomic<br>Number | Atomic<br>Type | Coordinates (Angstroms) |           |           |
|------------------|------------------|----------------|-------------------------|-----------|-----------|
|                  |                  |                | X                       | Y         | Z         |
| 1                | 6                | 0              | 3.742825                | 0.781742  | -0.746168 |
| 2                | 6                | 0              | 4.937705                | 0.065780  | -0.713248 |
| 3                | 6                | 0              | 5.081688                | -0.990823 | 0.183930  |
| 4                | 6                | 0              | 4.030469                | -1.309906 | 1.047218  |
| 5                | 6                | 0              | 2.856964                | -0.579886 | 1.011497  |
| 6                | 6                | 0              | 2.682858                | 0.475888  | 0.105351  |
| 7                | 1                | 0              | 3.633382                | 1.579750  | -1.473040 |
| 8                | 1                | 0              | 5.732740                | 0.334037  | -1.395531 |
| 9                | 1                | 0              | 4.168538                | -2.122860 | 1.749295  |
| 10               | 1                | 0              | 2.064352                | -0.813886 | 1.714349  |
| 11               | 6                | 0              | 1.416499                | 1.241706  | 0.053602  |
| 12               | 6                | 0              | 0.216331                | 0.591967  | 0.056544  |
| 13               | 6                | 0              | 1.465505                | 2.698550  | 0.030738  |
| 14               | 1                | 0              | 0.208287                | -0.492349 | 0.064986  |
| 15               | 1                | 0              | 2.476916                | 3.140992  | 0.051196  |
| 16               | 8                | 0              | 0.487295                | 3.430047  | 0.010857  |
| 17               | 7                | 0              | -0.995711               | 1.197962  | 0.060022  |
| 18               | 1                | 0              | -0.963997               | 2.215737  | 0.093481  |
| 19               | 6                | 0              | -2.235689               | 0.571595  | 0.006231  |
| 20               | 6                | 0              | -3.373908               | 1.357496  | 0.240850  |
| 21               | 6                | 0              | -2.387766               | -0.791268 | -0.281954 |
| 22               | 6                | 0              | -4.635819               | 0.797370  | 0.202843  |
| 23               | 1                | 0              | -3.254075               | 2.411943  | 0.461047  |
| 24               | 6                | 0              | -3.651078               | -1.357066 | -0.312163 |
| 25               | 1                | 0              | -1.533267               | -1.414243 | -0.507237 |
| 26               | 6                | 0              | -4.758533               | -0.559408 | -0.067756 |
| 27               | 1                | 0              | -5.522248               | 1.389598  | 0.385995  |
| 28               | 1                | 0              | -3.789267               | -2.406516 | -0.534993 |
| 29               | 8                | 0              | 6.195220                | -1.757496 | 0.295886  |
| 30               | 6                | 0              | 7.278542                | -1.475234 | -0.565820 |
| 31               | 1                | 0              | 8.053752                | -2.198148 | -0.322550 |
| 32               | 1                | 0              | 6.988923                | -1.591544 | -1.614915 |
| 33               | 1                | 0              | 7.660954                | -0.462863 | -0.401984 |
| 34               | 7                | 0              | -6.096660               | -1.163120 | -0.105724 |
| 35               | 8                | 0              | -7.045900               | -0.437661 | 0.104728  |
| 36               | 8                | 0              | -6.171359               | -2.350459 | -0.344014 |

### Structure 37a (CHCl<sub>3</sub>)

Energy (Hartrees): -1028.30949310  
No imaginary frequencies

Standard orientation:

| Center<br>Number | Atomic<br>Number | Atomic<br>Type | Coordinates (Angstroms) |           |           |
|------------------|------------------|----------------|-------------------------|-----------|-----------|
|                  |                  |                | X                       | Y         | Z         |
| 1                | 6                | 0              | 3.774195                | 0.821527  | -0.697114 |
| 2                | 6                | 0              | 4.969573                | 0.104934  | -0.661411 |
| 3                | 6                | 0              | 5.079067                | -1.008579 | 0.170323  |
| 4                | 6                | 0              | 3.991660                | -1.385595 | 0.964106  |
| 5                | 6                | 0              | 2.817313                | -0.654915 | 0.927524  |
| 6                | 6                | 0              | 2.678625                | 0.460582  | 0.088171  |
| 7                | 1                | 0              | 3.697383                | 1.668514  | -1.371210 |
| 8                | 1                | 0              | 5.793268                | 0.417782  | -1.289405 |
| 9                | 1                | 0              | 4.096234                | -2.243917 | 1.617712  |
| 10               | 1                | 0              | 1.996257                | -0.941397 | 1.576297  |
| 11               | 6                | 0              | 1.415869                | 1.235699  | 0.044066  |
| 12               | 6                | 0              | 0.211203                | 0.588039  | 0.029397  |
| 13               | 6                | 0              | 1.480298                | 2.687512  | 0.054177  |

|    |   |   |           |           |           |
|----|---|---|-----------|-----------|-----------|
| 14 | 1 | 0 | 0.199782  | -0.496034 | 0.009437  |
| 15 | 1 | 0 | 2.492766  | 3.121826  | 0.104035  |
| 16 | 8 | 0 | 0.507613  | 3.433497  | 0.031816  |
| 17 | 7 | 0 | -0.998798 | 1.193457  | 0.048863  |
| 18 | 1 | 0 | -0.982878 | 2.209242  | 0.115450  |
| 19 | 6 | 0 | -2.239745 | 0.569509  | -0.003933 |
| 20 | 6 | 0 | -3.372353 | 1.359488  | 0.248316  |
| 21 | 6 | 0 | -2.397143 | -0.790753 | -0.304759 |
| 22 | 6 | 0 | -4.636011 | 0.804842  | 0.217607  |
| 23 | 1 | 0 | -3.245710 | 2.411724  | 0.476729  |
| 24 | 6 | 0 | -3.661875 | -1.350801 | -0.330532 |
| 25 | 1 | 0 | -1.546120 | -1.416445 | -0.536582 |
| 26 | 6 | 0 | -4.765798 | -0.550540 | -0.066435 |
| 27 | 1 | 0 | -5.511947 | 1.407231  | 0.418380  |
| 28 | 1 | 0 | -3.795069 | -2.398765 | -0.563973 |
| 29 | 8 | 0 | 6.191241  | -1.778347 | 0.278536  |
| 30 | 6 | 0 | 7.320529  | -1.420527 | -0.501462 |
| 31 | 1 | 0 | 8.093868  | -2.148348 | -0.263491 |
| 32 | 1 | 0 | 7.093516  | -1.469730 | -1.570491 |
| 33 | 1 | 0 | 7.675073  | -0.418032 | -0.244458 |
| 34 | 7 | 0 | -6.099205 | -1.146946 | -0.095640 |
| 35 | 8 | 0 | -7.054237 | -0.424473 | 0.116756  |
| 36 | 8 | 0 | -6.189973 | -2.337148 | -0.329512 |

### Structure 37a (DMSO)

Energy (Hartrees): -1028.30916366  
No imaginary frequencies

Standard orientation:

| Center<br>Number | Atomic<br>Number | Atomic<br>Type | Coordinates (Angstroms) |           |           |
|------------------|------------------|----------------|-------------------------|-----------|-----------|
|                  |                  |                | X                       | Y         | Z         |
| 1                | 6                | 0              | 3.784957                | 0.844647  | -0.667916 |
| 2                | 6                | 0              | 4.978784                | 0.124127  | -0.641060 |
| 3                | 6                | 0              | 5.078212                | -1.014551 | 0.158174  |
| 4                | 6                | 0              | 3.980648                | -1.411614 | 0.929079  |
| 5                | 6                | 0              | 2.807597                | -0.677379 | 0.902031  |
| 6                | 6                | 0              | 2.680075                | 0.463627  | 0.095380  |
| 7                | 1                | 0              | 3.718766                | 1.711635  | -1.317357 |
| 8                | 1                | 0              | 5.808579                | 0.453752  | -1.252585 |
| 9                | 1                | 0              | 4.071270                | -2.291060 | 1.556552  |
| 10               | 1                | 0              | 1.977743                | -0.985656 | 1.529546  |
| 11               | 6                | 0              | 1.416773                | 1.238330  | 0.057088  |
| 12               | 6                | 0              | 0.214315                | 0.585085  | 0.032898  |
| 13               | 6                | 0              | 1.481360                | 2.689406  | 0.084396  |
| 14               | 1                | 0              | 0.208230                | -0.498773 | 0.006169  |
| 15               | 1                | 0              | 2.493808                | 3.121759  | 0.146411  |
| 16               | 8                | 0              | 0.509455                | 3.437515  | 0.064429  |
| 17               | 7                | 0              | -0.996654               | 1.187021  | 0.047778  |
| 18               | 1                | 0              | -0.987611               | 2.203310  | 0.110230  |
| 19               | 6                | 0              | -2.236941               | 0.562277  | -0.002562 |
| 20               | 6                | 0              | -3.370966               | 1.367039  | 0.193157  |
| 21               | 6                | 0              | -2.393847               | -0.809883 | -0.245936 |
| 22               | 6                | 0              | -4.636228               | 0.816843  | 0.160144  |
| 23               | 1                | 0              | -3.244086               | 2.427835  | 0.377784  |
| 24               | 6                | 0              | -3.660747               | -1.364358 | -0.275829 |
| 25               | 1                | 0              | -1.542793               | -1.452173 | -0.426171 |
| 26               | 6                | 0              | -4.766900               | -0.549015 | -0.070311 |
| 27               | 1                | 0              | -5.510980               | 1.434145  | 0.315568  |
| 28               | 1                | 0              | -3.789643               | -2.421892 | -0.464634 |
| 29               | 8                | 0              | 6.187206                | -1.789074 | 0.252105  |
| 30               | 6                | 0              | 7.320271                | -1.409025 | -0.515525 |
| 31               | 1                | 0              | 8.090503                | -2.148004 | -0.303150 |
| 32               | 1                | 0              | 7.093740                | -1.418993 | -1.585460 |
| 33               | 1                | 0              | 7.678984                | -0.417399 | -0.224655 |
| 34               | 7                | 0              | -6.100586               | -1.140078 | -0.100615 |
| 35               | 8                | 0              | -7.057158               | -0.410249 | 0.086807  |
| 36               | 8                | 0              | -6.195751               | -2.335746 | -0.310545 |

### Structure 37a (C<sub>2</sub>H<sub>5</sub>OH)

Energy (Hartrees): -1028.30975545  
No imaginary frequencies

Standard orientation:

| Center<br>Number | Atomic<br>Number | Atomic<br>Type | Coordinates (Angstroms) |           |           |
|------------------|------------------|----------------|-------------------------|-----------|-----------|
|                  |                  |                | X                       | Y         | Z         |
| 1                | 6                | 0              | 3.775819                | 0.826854  | -0.691577 |
| 2                | 6                | 0              | 4.968017                | 0.104515  | -0.656453 |
| 3                | 6                | 0              | 5.068391                | -1.013422 | 0.169707  |
| 4                | 6                | 0              | 3.978164                | -1.391052 | 0.958487  |
| 5                | 6                | 0              | 2.806533                | -0.654580 | 0.922948  |
| 6                | 6                | 0              | 2.676663                | 0.466498  | 0.089887  |
| 7                | 1                | 0              | 3.705702                | 1.677888  | -1.361474 |
| 8                | 1                | 0              | 5.794868                | 0.416861  | -1.280891 |
| 9                | 1                | 0              | 4.073642                | -2.255196 | 1.606489  |
| 10               | 1                | 0              | 1.981124                | -0.944406 | 1.564933  |
| 11               | 6                | 0              | 1.415812                | 1.245442  | 0.045618  |
| 12               | 6                | 0              | 0.210154                | 0.594354  | 0.036904  |
| 13               | 6                | 0              | 1.486647                | 2.691436  | 0.045908  |
| 14               | 1                | 0              | 0.202753                | -0.489903 | 0.021055  |
| 15               | 1                | 0              | 2.498784                | 3.123804  | 0.095115  |
| 16               | 8                | 0              | 0.514312                | 3.445854  | 0.014324  |
| 17               | 7                | 0              | -0.998977               | 1.195712  | 0.057228  |
| 18               | 1                | 0              | -0.993710               | 2.211481  | 0.128073  |
| 19               | 6                | 0              | -2.238255               | 0.567740  | 0.005687  |
| 20               | 6                | 0              | -3.371859               | 1.360788  | 0.244777  |
| 21               | 6                | 0              | -2.390929               | -0.795602 | -0.284334 |
| 22               | 6                | 0              | -4.634646               | 0.806122  | 0.211382  |
| 23               | 1                | 0              | -3.246502               | 2.415289  | 0.463403  |
| 24               | 6                | 0              | -3.654615               | -1.355527 | -0.315832 |
| 25               | 1                | 0              | -1.538613               | -1.424171 | -0.503368 |
| 26               | 6                | 0              | -4.760983               | -0.552124 | -0.065156 |
| 27               | 1                | 0              | -5.509523               | 1.413682  | 0.401572  |
| 28               | 1                | 0              | -3.781274               | -2.405994 | -0.542047 |
| 29               | 8                | 0              | 6.180585                | -1.791067 | 0.274507  |
| 30               | 6                | 0              | 7.316724                | -1.426439 | -0.499403 |
| 31               | 1                | 0              | 8.086904                | -2.158733 | -0.264812 |
| 32               | 1                | 0              | 7.091097                | -1.464510 | -1.568558 |
| 33               | 1                | 0              | 7.669277                | -0.427191 | -0.229389 |
| 34               | 7                | 0              | -6.088282               | -1.146020 | -0.101187 |
| 35               | 8                | 0              | -7.047848               | -0.436761 | 0.145624  |
| 36               | 8                | 0              | -6.188740               | -2.328870 | -0.376165 |

### Structure 37b (vacuum)

Energy (Hartrees): -1028.27736263  
No imaginary frequencies

Standard orientation:

| Center<br>Number | Atomic<br>Number | Atomic<br>Type | Coordinates (Angstroms) |           |           |
|------------------|------------------|----------------|-------------------------|-----------|-----------|
|                  |                  |                | X                       | Y         | Z         |
| 1                | 6                | 0              | 3.486865                | 0.899260  | 1.022935  |
| 2                | 6                | 0              | 4.473081                | -0.063011 | 1.127683  |
| 3                | 6                | 0              | 4.532359                | -1.111510 | 0.204440  |
| 4                | 6                | 0              | 3.594109                | -1.177482 | -0.824486 |
| 5                | 6                | 0              | 2.610813                | -0.193463 | -0.921065 |
| 6                | 6                | 0              | 2.532072                | 0.853700  | -0.003894 |
| 7                | 1                | 0              | 3.443210                | 1.699438  | 1.754305  |
| 8                | 1                | 0              | 5.211219                | -0.031575 | 1.919580  |
| 9                | 1                | 0              | 3.624953                | -1.968036 | -1.561920 |
| 10               | 1                | 0              | 1.908154                | -0.230506 | -1.747966 |
| 11               | 6                | 0              | 1.496568                | 1.906657  | -0.107160 |
| 12               | 6                | 0              | 0.167403                | 1.659623  | -0.121852 |
| 13               | 6                | 0              | 1.908430                | 3.322466  | -0.164029 |

|    |   |   |           |           |           |
|----|---|---|-----------|-----------|-----------|
| 14 | 1 | 0 | -0.502251 | 2.507697  | -0.198309 |
| 15 | 1 | 0 | 3.004041  | 3.482690  | -0.158747 |
| 16 | 8 | 0 | 1.151333  | 4.263539  | -0.218102 |
| 17 | 8 | 0 | 5.531851  | -2.007103 | 0.388743  |
| 18 | 6 | 0 | 5.646485  | -3.069229 | -0.536816 |
| 19 | 1 | 0 | 5.817525  | -2.691913 | -1.549766 |
| 20 | 1 | 0 | 6.506019  | -3.654521 | -0.219090 |
| 21 | 1 | 0 | 4.752630  | -3.700649 | -0.526762 |
| 22 | 7 | 0 | -0.400791 | 0.424340  | -0.017775 |
| 23 | 1 | 0 | 0.236098  | -0.351342 | 0.115558  |
| 24 | 6 | 0 | -1.756707 | 0.124146  | -0.000002 |
| 25 | 6 | 0 | -2.131258 | -1.213146 | 0.202588  |
| 26 | 6 | 0 | -2.750577 | 1.096291  | -0.181707 |
| 27 | 6 | 0 | -3.463178 | -1.576900 | 0.226436  |
| 28 | 1 | 0 | -1.364432 | -1.966330 | 0.345637  |
| 29 | 6 | 0 | -4.086088 | 0.733775  | -0.153935 |
| 30 | 1 | 0 | -2.496093 | 2.133345  | -0.348490 |
| 31 | 6 | 0 | -4.428794 | -0.594786 | 0.048337  |
| 32 | 1 | 0 | -3.765492 | -2.603555 | 0.382927  |
| 33 | 1 | 0 | -4.866116 | 1.470846  | -0.290324 |
| 34 | 7 | 0 | -5.846807 | -0.972682 | 0.076599  |
| 35 | 8 | 0 | -6.666758 | -0.091809 | -0.075445 |
| 36 | 8 | 0 | -6.112148 | -2.144069 | 0.250650  |

### Structure 37b (CHCl<sub>3</sub>)

Energy (Hartrees): -1028.30677199  
 No imaginary frequencies

Standard orientation:

| Center<br>Number | Atomic<br>Number | Atomic<br>Type | Coordinates (Angstroms) |           |           |
|------------------|------------------|----------------|-------------------------|-----------|-----------|
|                  |                  |                | X                       | Y         | Z         |
| 1                | 6                | 0              | 3.560901                | 0.967301  | 0.939821  |
| 2                | 6                | 0              | 4.558772                | 0.015284  | 1.045240  |
| 3                | 6                | 0              | 4.561939                | -1.096131 | 0.195495  |
| 4                | 6                | 0              | 3.554628                | -1.236900 | -0.758984 |
| 5                | 6                | 0              | 2.561581                | -0.263173 | -0.858468 |
| 6                | 6                | 0              | 2.537958                | 0.847045  | -0.013449 |
| 7                | 1                | 0              | 3.564558                | 1.817950  | 1.613897  |
| 8                | 1                | 0              | 5.346973                | 0.109793  | 1.783273  |
| 9                | 1                | 0              | 3.538804                | -2.079129 | -1.437912 |
| 10               | 1                | 0              | 1.805046                | -0.367052 | -1.630615 |
| 11               | 6                | 0              | 1.495622                | 1.893598  | -0.121769 |
| 12               | 6                | 0              | 0.160729                | 1.649613  | -0.121274 |
| 13               | 6                | 0              | 1.910210                | 3.299096  | -0.207745 |
| 14               | 1                | 0              | -0.509332               | 2.496303  | -0.209201 |
| 15               | 1                | 0              | 3.003675                | 3.457426  | -0.244128 |
| 16               | 8                | 0              | 1.159207                | 4.254835  | -0.247829 |
| 17               | 8                | 0              | 5.578048                | -1.975608 | 0.369456  |
| 18               | 6                | 0              | 5.622167                | -3.114303 | -0.476443 |
| 19               | 1                | 0              | 5.723360                | -2.822241 | -1.525859 |
| 20               | 1                | 0              | 6.501070                | -3.680061 | -0.174072 |
| 21               | 1                | 0              | 4.730249                | -3.734671 | -0.348673 |
| 22               | 7                | 0              | -0.413330               | 0.424966  | 0.005755  |
| 23               | 1                | 0              | 0.210442                | -0.364190 | 0.135847  |
| 24               | 6                | 0              | -1.770054               | 0.131722  | 0.019842  |
| 25               | 6                | 0              | -2.141951               | -1.212272 | 0.188263  |
| 26               | 6                | 0              | -2.763807               | 1.110885  | -0.129970 |
| 27               | 6                | 0              | -3.472630               | -1.577152 | 0.203332  |
| 28               | 1                | 0              | -1.373191               | -1.967573 | 0.308651  |
| 29               | 6                | 0              | -4.098083               | 0.747322  | -0.110309 |
| 30               | 1                | 0              | -2.513175               | 2.154200  | -0.261868 |
| 31               | 6                | 0              | -4.440109               | -0.588864 | 0.053858  |
| 32               | 1                | 0              | -3.763687               | -2.611197 | 0.331547  |
| 33               | 1                | 0              | -4.871531               | 1.495366  | -0.223840 |
| 34               | 7                | 0              | -5.850732               | -0.964640 | 0.072250  |
| 35               | 8                | 0              | -6.681038               | -0.080079 | -0.015266 |
| 36               | 8                | 0              | -6.127726               | -2.144853 | 0.175173  |

### Structure 37b (DMSO)

Energy (Hartrees): -1028.30745684  
No imaginary frequencies

Standard orientation:

| Center<br>Number | Atomic<br>Number | Atomic<br>Type | Coordinates (Angstroms) |           |           |
|------------------|------------------|----------------|-------------------------|-----------|-----------|
|                  |                  |                | X                       | Y         | Z         |
| 1                | 6                | 0              | 3.571522                | 0.978188  | 0.923255  |
| 2                | 6                | 0              | 4.569545                | 0.025740  | 1.029384  |
| 3                | 6                | 0              | 4.565521                | -1.094708 | 0.190921  |
| 4                | 6                | 0              | 3.553802                | -1.239682 | -0.758990 |
| 5                | 6                | 0              | 2.560508                | -0.266170 | -0.858939 |
| 6                | 6                | 0              | 2.541985                | 0.850905  | -0.022242 |
| 7                | 1                | 0              | 3.581743                | 1.833587  | 1.591491  |
| 8                | 1                | 0              | 5.360113                | 0.127374  | 1.764206  |
| 9                | 1                | 0              | 3.529588                | -2.088829 | -1.429277 |
| 10               | 1                | 0              | 1.796224                | -0.380417 | -1.621941 |
| 11               | 6                | 0              | 1.496125                | 1.894824  | -0.125255 |
| 12               | 6                | 0              | 0.160016                | 1.648056  | -0.129805 |
| 13               | 6                | 0              | 1.914052                | 3.298906  | -0.196539 |
| 14               | 1                | 0              | -0.513934               | 2.492356  | -0.212942 |
| 15               | 1                | 0              | 3.008339                | 3.450538  | -0.236569 |
| 16               | 8                | 0              | 1.170720                | 4.262413  | -0.220740 |
| 17               | 8                | 0              | 5.576077                | -1.978038 | 0.370225  |
| 18               | 6                | 0              | 5.586272                | -3.142967 | -0.443849 |
| 19               | 1                | 0              | 5.683965                | -2.884601 | -1.502118 |
| 20               | 1                | 0              | 6.454546                | -3.720632 | -0.132802 |
| 21               | 1                | 0              | 4.680593                | -3.737114 | -0.291937 |
| 22               | 7                | 0              | -0.412963               | 0.423551  | -0.013672 |
| 23               | 1                | 0              | 0.205713                | -0.372239 | 0.107450  |
| 24               | 6                | 0              | -1.769349               | 0.132837  | 0.001083  |
| 25               | 6                | 0              | -2.140142               | -1.211902 | 0.168933  |
| 26               | 6                | 0              | -2.763300               | 1.112747  | -0.145626 |
| 27               | 6                | 0              | -3.470591               | -1.575525 | 0.193037  |
| 28               | 1                | 0              | -1.369089               | -1.965921 | 0.283007  |
| 29               | 6                | 0              | -4.097484               | 0.750220  | -0.116184 |
| 30               | 1                | 0              | -2.513144               | 2.155611  | -0.282954 |
| 31               | 6                | 0              | -4.439456               | -0.586286 | 0.052094  |
| 32               | 1                | 0              | -3.757562               | -2.610439 | 0.323027  |
| 33               | 1                | 0              | -4.867978               | 1.501808  | -0.226991 |
| 34               | 7                | 0              | -5.847889               | -0.961557 | 0.085697  |
| 35               | 8                | 0              | -6.681968               | -0.076898 | 0.014442  |
| 36               | 8                | 0              | -6.125743               | -2.143243 | 0.185635  |

### Structure 37b (C<sub>2</sub>H<sub>5</sub>OH)

Energy (Hartrees): -1028.30840849  
No imaginary frequencies

Standard orientation:

| Center<br>Number | Atomic<br>Number | Atomic<br>Type | Coordinates (Angstroms) |           |           |
|------------------|------------------|----------------|-------------------------|-----------|-----------|
|                  |                  |                | X                       | Y         | Z         |
| 1                | 6                | 0              | 3.560231                | 0.965748  | 0.943848  |
| 2                | 6                | 0              | 4.556032                | 0.009899  | 1.044253  |
| 3                | 6                | 0              | 4.555395                | -1.096043 | 0.188486  |
| 4                | 6                | 0              | 3.552545                | -1.228080 | -0.771183 |
| 5                | 6                | 0              | 2.562036                | -0.251549 | -0.865269 |
| 6                | 6                | 0              | 2.539779                | 0.852988  | -0.012528 |
| 7                | 1                | 0              | 3.565765                | 1.811670  | 1.624117  |
| 8                | 1                | 0              | 5.341789                | 0.098455  | 1.786294  |
| 9                | 1                | 0              | 3.533522                | -2.067357 | -1.453885 |
| 10               | 1                | 0              | 1.803840                | -0.352362 | -1.636156 |
| 11               | 6                | 0              | 1.495537                | 1.899527  | -0.113611 |
| 12               | 6                | 0              | 0.157672                | 1.651342  | -0.118184 |
| 13               | 6                | 0              | 1.910902                | 3.296349  | -0.186094 |



|    |   |   |           |           |           |
|----|---|---|-----------|-----------|-----------|
| 14 | 1 | 0 | -0.518945 | 2.493458  | -0.202125 |
| 15 | 1 | 0 | 3.002673  | 3.455729  | -0.218635 |
| 16 | 8 | 0 | 1.163010  | 4.264033  | -0.219527 |
| 17 | 8 | 0 | 5.567355  | -1.986856 | 0.362450  |
| 18 | 6 | 0 | 5.592524  | -3.132442 | -0.481565 |
| 19 | 1 | 0 | 5.699469  | -2.843429 | -1.530677 |
| 20 | 1 | 0 | 6.461483  | -3.711694 | -0.175612 |
| 21 | 1 | 0 | 4.688376  | -3.733165 | -0.350858 |
| 22 | 7 | 0 | -0.410402 | 0.427697  | 0.000479  |
| 23 | 1 | 0 | 0.211094  | -0.365182 | 0.129700  |
| 24 | 6 | 0 | -1.767241 | 0.133384  | 0.009006  |
| 25 | 6 | 0 | -2.135845 | -1.207596 | 0.206382  |
| 26 | 6 | 0 | -2.760020 | 1.108038  | -0.173907 |
| 27 | 6 | 0 | -3.465337 | -1.573540 | 0.226321  |
| 28 | 1 | 0 | -1.365023 | -1.957444 | 0.346216  |
| 29 | 6 | 0 | -4.093331 | 0.744598  | -0.148812 |
| 30 | 1 | 0 | -2.509461 | 2.146784  | -0.339504 |
| 31 | 6 | 0 | -4.433452 | -0.588654 | 0.050966  |
| 32 | 1 | 0 | -3.751109 | -2.605657 | 0.380191  |
| 33 | 1 | 0 | -4.864068 | 1.491355  | -0.287558 |
| 34 | 7 | 0 | -5.837314 | -0.963992 | 0.078566  |
| 35 | 8 | 0 | -6.675966 | -0.086475 | -0.030782 |
| 36 | 8 | 0 | -6.120642 | -2.142067 | 0.211176  |

### Structure 37c (vacuum)

Energy (Hartrees): -1028.27802549

No imaginary frequencies

Standard orientation:

| Center<br>Number | Atomic<br>Number | Atomic<br>Type | Coordinates (Angstroms) |           |           |
|------------------|------------------|----------------|-------------------------|-----------|-----------|
|                  |                  |                | X                       | Y         | Z         |
| 1                | 6                | 0              | -3.497688               | 0.881268  | 0.957360  |
| 2                | 6                | 0              | -4.442834               | -0.121531 | 1.041780  |
| 3                | 6                | 0              | -4.405625               | -1.204172 | 0.156689  |
| 4                | 6                | 0              | -3.410156               | -1.266888 | -0.816196 |
| 5                | 6                | 0              | -2.460221               | -0.248261 | -0.887473 |
| 6                | 6                | 0              | -2.478445               | 0.829818  | -0.004870 |
| 7                | 1                | 0              | -3.547570               | 1.725845  | 1.633264  |
| 8                | 1                | 0              | -5.234553               | -0.089210 | 1.780038  |
| 9                | 1                | 0              | -3.368664               | -2.080562 | -1.527342 |
| 10               | 1                | 0              | -1.707941               | -0.285657 | -1.669553 |
| 11               | 6                | 0              | -1.466638               | 1.905713  | -0.085284 |
| 12               | 6                | 0              | -0.132284               | 1.681081  | -0.093056 |
| 13               | 6                | 0              | -1.876413               | 3.316388  | -0.106998 |
| 14               | 1                | 0              | 0.545956                | 2.524339  | -0.158313 |
| 15               | 8                | 0              | -5.378418               | -2.133659 | 0.318186  |
| 16               | 6                | 0              | -5.422642               | -3.209507 | -0.596666 |
| 17               | 1                | 0              | -4.513541               | -3.816427 | -0.539360 |
| 18               | 1                | 0              | -6.279343               | -3.814494 | -0.309386 |
| 19               | 1                | 0              | -5.558109               | -2.848945 | -1.621073 |
| 20               | 7                | 0              | 0.457374                | 0.454393  | 0.028924  |
| 21               | 1                | 0              | -0.164392               | -0.318999 | 0.231986  |
| 22               | 6                | 0              | 1.818123                | 0.181615  | 0.020883  |
| 23               | 6                | 0              | 2.243796                | -1.084440 | 0.452242  |
| 24               | 6                | 0              | 2.769270                | 1.114715  | -0.414976 |
| 25               | 6                | 0              | 3.585738                | -1.410143 | 0.462682  |
| 26               | 1                | 0              | 1.510264                | -1.806660 | 0.792501  |
| 27               | 6                | 0              | 4.115670                | 0.793585  | -0.395397 |
| 28               | 1                | 0              | 2.467894                | 2.083089  | -0.789447 |
| 29               | 6                | 0              | 4.509458                | -0.461563 | 0.043399  |
| 30               | 1                | 0              | 3.928534                | -2.380012 | 0.797143  |
| 31               | 1                | 0              | 4.863259                | 1.500886  | -0.728791 |
| 32               | 8                | 0              | -3.013049               | 3.712697  | -0.032360 |
| 33               | 1                | 0              | -1.035010               | 4.034976  | -0.195419 |
| 34               | 7                | 0              | 5.938370                | -0.798431 | 0.057481  |
| 35               | 8                | 0              | 6.720386                | 0.055034  | -0.305544 |
| 36               | 8                | 0              | 6.249624                | -1.909819 | 0.431491  |

### Structure 37c (CHCl<sub>3</sub>)

Energy (Hartrees): -1028.30867136  
No imaginary frequencies

Standard orientation:

| Center<br>Number | Atomic<br>Number | Atomic<br>Type | Coordinates (Angstroms) |           |           |
|------------------|------------------|----------------|-------------------------|-----------|-----------|
|                  |                  |                | X                       | Y         | Z         |
| 1                | 6                | 0              | 3.425828                | 0.892492  | 0.983574  |
| 2                | 6                | 0              | 4.361506                | -0.112603 | 1.141518  |
| 3                | 6                | 0              | 4.385304                | -1.198292 | 0.258637  |
| 4                | 6                | 0              | 3.468429                | -1.256665 | -0.789593 |
| 5                | 6                | 0              | 2.530911                | -0.233386 | -0.935655 |
| 6                | 6                | 0              | 2.483829                | 0.845033  | -0.054255 |
| 7                | 1                | 0              | 3.419002                | 1.729768  | 1.672018  |
| 8                | 1                | 0              | 5.087985                | -0.079620 | 1.945240  |
| 9                | 1                | 0              | 3.477131                | -2.073315 | -1.499439 |
| 10               | 1                | 0              | 1.837120                | -0.274695 | -1.770211 |
| 11               | 6                | 0              | 1.473580                | 1.919672  | -0.197083 |
| 12               | 6                | 0              | 0.133322                | 1.698879  | -0.211313 |
| 13               | 6                | 0              | 1.884570                | 3.316494  | -0.290910 |
| 14               | 1                | 0              | -0.539271               | 2.542357  | -0.322308 |
| 15               | 8                | 0              | 5.332948                | -2.137212 | 0.497948  |
| 16               | 6                | 0              | 5.367025                | -3.275224 | -0.348470 |
| 17               | 1                | 0              | 5.584958                | -2.993051 | -1.382530 |
| 18               | 1                | 0              | 6.169203                | -3.906483 | 0.028603  |
| 19               | 1                | 0              | 4.422251                | -3.825341 | -0.304988 |
| 20               | 7                | 0              | -0.455466               | 0.478960  | -0.093848 |
| 21               | 1                | 0              | 0.161814                | -0.322323 | -0.021230 |
| 22               | 6                | 0              | -1.815737               | 0.206590  | -0.038936 |
| 23               | 6                | 0              | -2.211716               | -1.139381 | -0.093747 |
| 24               | 6                | 0              | -2.787887               | 1.210183  | 0.080080  |
| 25               | 6                | 0              | -3.547702               | -1.481135 | -0.042529 |
| 26               | 1                | 0              | -1.457438               | -1.913151 | -0.184385 |
| 27               | 6                | 0              | -4.128238               | 0.870293  | 0.125047  |
| 28               | 1                | 0              | -2.511841               | 2.253036  | 0.155574  |
| 29               | 6                | 0              | -4.494718               | -0.467687 | 0.062052  |
| 30               | 1                | 0              | -3.858669               | -2.516377 | -0.088215 |
| 31               | 1                | 0              | -4.886500               | 1.636095  | 0.220804  |
| 32               | 8                | 0              | 3.031780                | 3.714202  | -0.260106 |
| 33               | 1                | 0              | 1.051017                | 4.036841  | -0.396996 |
| 34               | 7                | 0              | -5.911574               | -0.818643 | 0.109900  |
| 35               | 8                | 0              | -6.724689               | 0.084847  | 0.154837  |
| 36               | 8                | 0              | -6.209703               | -1.997779 | 0.100470  |

### Structure 37c (DMSO)

Energy (Hartrees): -1028.31077755  
No imaginary frequencies

Standard orientation:

| Center<br>Number | Atomic<br>Number | Atomic<br>Type | Coordinates (Angstroms) |           |           |
|------------------|------------------|----------------|-------------------------|-----------|-----------|
|                  |                  |                | X                       | Y         | Z         |
| 1                | 6                | 0              | -3.433175               | 0.848042  | 1.032801  |
| 2                | 6                | 0              | -4.402419               | -0.133982 | 1.128745  |
| 3                | 6                | 0              | -4.442110               | -1.178731 | 0.197282  |
| 4                | 6                | 0              | -3.494152               | -1.228172 | -0.824439 |
| 5                | 6                | 0              | -2.522216               | -0.230494 | -0.905963 |
| 6                | 6                | 0              | -2.471779               | 0.817002  | 0.012293  |
| 7                | 1                | 0              | -3.416788               | 1.653900  | 1.758078  |
| 8                | 1                | 0              | -5.144648               | -0.109166 | 1.918638  |
| 9                | 1                | 0              | -3.502293               | -2.020275 | -1.561670 |
| 10               | 1                | 0              | -1.800222               | -0.268903 | -1.716213 |
| 11               | 6                | 0              | -1.450543               | 1.885541  | -0.085840 |
| 12               | 6                | 0              | -0.109817               | 1.660279  | -0.105317 |
| 13               | 6                | 0              | -1.848505               | 3.286342  | -0.144887 |

|    |   |   |           |           |           |
|----|---|---|-----------|-----------|-----------|
| 14 | 1 | 0 | 0.562179  | 2.507268  | -0.190214 |
| 15 | 8 | 0 | -5.430779 | -2.089491 | 0.363499  |
| 16 | 6 | 0 | -5.538647 | -3.124099 | -0.604908 |
| 17 | 1 | 0 | -4.647943 | -3.758717 | -0.606347 |
| 18 | 1 | 0 | -6.403827 | -3.718654 | -0.317966 |
| 19 | 1 | 0 | -5.698216 | -2.710137 | -1.604702 |
| 20 | 7 | 0 | 0.478641  | 0.441881  | 0.004399  |
| 21 | 1 | 0 | -0.126832 | -0.356819 | 0.169903  |
| 22 | 6 | 0 | 1.840629  | 0.177039  | 0.001242  |
| 23 | 6 | 0 | 2.251593  | -1.127744 | 0.320559  |
| 24 | 6 | 0 | 2.801805  | 1.149583  | -0.312438 |
| 25 | 6 | 0 | 3.591619  | -1.455531 | 0.342077  |
| 26 | 1 | 0 | 1.505511  | -1.877971 | 0.557005  |
| 27 | 6 | 0 | 4.145552  | 0.823781  | -0.287374 |
| 28 | 1 | 0 | 2.515563  | 2.155799  | -0.585877 |
| 29 | 6 | 0 | 4.528154  | -0.471498 | 0.040585  |
| 30 | 1 | 0 | 3.910131  | -2.458481 | 0.593186  |
| 31 | 1 | 0 | 4.891842  | 1.570118  | -0.525566 |
| 32 | 8 | 0 | -2.994098 | 3.696364  | -0.135070 |
| 33 | 1 | 0 | -1.005614 | 3.999986  | -0.206744 |
| 34 | 7 | 0 | 5.946753  | -0.808938 | 0.064435  |
| 35 | 8 | 0 | 6.751050  | 0.062993  | -0.211374 |
| 36 | 8 | 0 | 6.262259  | -1.947702 | 0.359212  |

### Structure 37c (C<sub>2</sub>H<sub>5</sub>OH)

Energy (Hartrees): -1028.31228744  
No imaginary frequencies

Standard orientation:

| Center<br>Number | Atomic<br>Number | Atomic<br>Type | Coordinates (Angstroms) |           |           |
|------------------|------------------|----------------|-------------------------|-----------|-----------|
|                  |                  |                | X                       | Y         | Z         |
| 1                | 6                | 0              | -3.402851               | 0.828966  | 1.058572  |
| 2                | 6                | 0              | -4.370603               | -0.154528 | 1.156794  |
| 3                | 6                | 0              | -4.430252               | -1.178041 | 0.204828  |
| 4                | 6                | 0              | -3.508619               | -1.208603 | -0.840130 |
| 5                | 6                | 0              | -2.539779               | -0.208705 | -0.925524 |
| 6                | 6                | 0              | -2.468124               | 0.818873  | 0.013557  |
| 7                | 1                | 0              | -3.366435               | 1.618932  | 1.801202  |
| 8                | 1                | 0              | -5.094652               | -0.147838 | 1.963897  |
| 9                | 1                | 0              | -3.536130               | -1.985615 | -1.592850 |
| 10               | 1                | 0              | -1.838471               | -0.228690 | -1.754250 |
| 11               | 6                | 0              | -1.448485               | 1.889788  | -0.087340 |
| 12               | 6                | 0              | -0.105657               | 1.665390  | -0.112286 |
| 13               | 6                | 0              | -1.845927               | 3.282976  | -0.141681 |
| 14               | 1                | 0              | 0.566897                | 2.512027  | -0.196654 |
| 15               | 8                | 0              | -5.417772               | -2.096256 | 0.376864  |
| 16               | 6                | 0              | -5.555333               | -3.109687 | -0.612520 |
| 17               | 1                | 0              | -4.667612               | -3.747031 | -0.647187 |
| 18               | 1                | 0              | -6.416854               | -3.704879 | -0.316228 |
| 19               | 1                | 0              | -5.736887               | -2.670549 | -1.597344 |
| 20               | 7                | 0              | 0.478351                | 0.447297  | -0.008779 |
| 21               | 1                | 0              | -0.130942               | -0.350282 | 0.150124  |
| 22               | 6                | 0              | 1.840711                | 0.178164  | -0.011147 |
| 23               | 6                | 0              | 2.245940                | -1.128923 | 0.304328  |
| 24               | 6                | 0              | 2.803589                | 1.150142  | -0.319682 |
| 25               | 6                | 0              | 3.584667                | -1.460128 | 0.330122  |
| 26               | 1                | 0              | 1.497255                | -1.878363 | 0.535178  |
| 27               | 6                | 0              | 4.146136                | 0.822513  | -0.289454 |
| 28               | 1                | 0              | 2.520010                | 2.157341  | -0.592338 |
| 29               | 6                | 0              | 4.523487                | -0.475206 | 0.037209  |
| 30               | 1                | 0              | 3.899648                | -2.464971 | 0.578828  |
| 31               | 1                | 0              | 4.895006                | 1.568127  | -0.521882 |
| 32               | 8                | 0              | -2.999938               | 3.688640  | -0.125948 |
| 33               | 1                | 0              | -1.013326               | 4.005153  | -0.204505 |
| 34               | 7                | 0              | 5.937580                | -0.812193 | 0.070748  |
| 35               | 8                | 0              | 6.748966                | 0.061491  | -0.180854 |
| 36               | 8                | 0              | 6.255942                | -1.954755 | 0.350731  |

### Structure 37d (vacuum)

Energy (Hartrees): -1028.26827576  
No imaginary frequencies

Standard orientation:

| Center<br>Number | Atomic<br>Number | Atomic<br>Type | Coordinates (Angstroms) |           |           |
|------------------|------------------|----------------|-------------------------|-----------|-----------|
|                  |                  |                | X                       | Y         | Z         |
| 1                | 6                | 0              | -3.716144               | 0.841202  | 0.604087  |
| 2                | 6                | 0              | -4.840556               | 0.021997  | 0.659447  |
| 3                | 6                | 0              | -4.852971               | -1.186336 | -0.035382 |
| 4                | 6                | 0              | -3.738207               | -1.558457 | -0.790143 |
| 5                | 6                | 0              | -2.631360               | -0.731225 | -0.840503 |
| 6                | 6                | 0              | -2.590151               | 0.477018  | -0.131990 |
| 7                | 1                | 0              | -3.722212               | 1.779043  | 1.144159  |
| 8                | 1                | 0              | -5.692548               | 0.339532  | 1.245045  |
| 9                | 1                | 0              | -3.774633               | -2.488945 | -1.342971 |
| 10               | 1                | 0              | -1.789359               | -1.015032 | -1.463582 |
| 11               | 6                | 0              | -1.376501               | 1.327694  | -0.164245 |
| 12               | 6                | 0              | -0.155978               | 0.747423  | -0.042747 |
| 13               | 6                | 0              | -1.506374               | 2.780337  | -0.342593 |
| 14               | 1                | 0              | -0.116957               | -0.324586 | 0.110452  |
| 15               | 7                | 0              | 1.074533                | 1.354854  | -0.047065 |
| 16               | 1                | 0              | 1.114055                | 2.361814  | -0.024635 |
| 17               | 6                | 0              | 2.303400                | 0.705837  | -0.009970 |
| 18               | 6                | 0              | 3.446726                | 1.468510  | 0.274601  |
| 19               | 6                | 0              | 2.438834                | -0.665825 | -0.263401 |
| 20               | 6                | 0              | 4.694771                | 0.879115  | 0.317315  |
| 21               | 1                | 0              | 3.345875                | 2.530028  | 0.471266  |
| 22               | 6                | 0              | 3.687843                | -1.261169 | -0.208573 |
| 23               | 1                | 0              | 1.583610                | -1.271648 | -0.528628 |
| 24               | 6                | 0              | 4.799690                | -0.485457 | 0.081525  |
| 25               | 1                | 0              | 5.583402                | 1.454691  | 0.538888  |
| 26               | 1                | 0              | 3.811848                | -2.318194 | -0.402518 |
| 27               | 8                | 0              | -5.896044               | -2.054208 | -0.047765 |
| 28               | 6                | 0              | -7.057300               | -1.695790 | 0.672606  |
| 29               | 1                | 0              | -7.767661               | -2.505469 | 0.522741  |
| 30               | 1                | 0              | -6.843507               | -1.592443 | 1.741032  |
| 31               | 1                | 0              | -7.483785               | -0.761946 | 0.293385  |
| 32               | 1                | 0              | -0.556604               | 3.345560  | -0.440448 |
| 33               | 8                | 0              | -2.548097               | 3.386341  | -0.400966 |
| 34               | 7                | 0              | 6.122411                | -1.120846 | 0.132735  |
| 35               | 8                | 0              | 6.180247                | -2.314927 | -0.072746 |
| 36               | 8                | 0              | 7.075834                | -0.412168 | 0.378466  |

### Structure 37d (CHCl<sub>3</sub>)

Energy (Hartrees): -1028.30034458  
No imaginary frequencies

Standard orientation:

| Center<br>Number | Atomic<br>Number | Atomic<br>Type | Coordinates (Angstroms) |           |           |
|------------------|------------------|----------------|-------------------------|-----------|-----------|
|                  |                  |                | X                       | Y         | Z         |
| 1                | 6                | 0              | -3.705088               | 0.824697  | 0.635582  |
| 2                | 6                | 0              | -4.834282               | 0.009968  | 0.680394  |
| 3                | 6                | 0              | -4.857825               | -1.178835 | -0.048816 |
| 4                | 6                | 0              | -3.748793               | -1.536431 | -0.820133 |
| 5                | 6                | 0              | -2.636970               | -0.712306 | -0.858673 |
| 6                | 6                | 0              | -2.586395               | 0.479564  | -0.123118 |
| 7                | 1                | 0              | -3.700010               | 1.742888  | 1.210259  |
| 8                | 1                | 0              | -5.679553               | 0.311896  | 1.284763  |
| 9                | 1                | 0              | -3.785541               | -2.454963 | -1.394225 |
| 10               | 1                | 0              | -1.795672               | -0.991166 | -1.485059 |
| 11               | 6                | 0              | -1.372748               | 1.334745  | -0.143741 |
| 12               | 6                | 0              | -0.149390               | 0.748441  | -0.026150 |
| 13               | 6                | 0              | -1.508538               | 2.778263  | -0.333336 |

|    |   |   |           |           |           |
|----|---|---|-----------|-----------|-----------|
| 14 | 1 | 0 | -0.116891 | -0.327398 | 0.101965  |
| 15 | 7 | 0 | 1.076199  | 1.349314  | -0.013505 |
| 16 | 1 | 0 | 1.127700  | 2.358274  | 0.029927  |
| 17 | 6 | 0 | 2.303229  | 0.698281  | 0.010619  |
| 18 | 6 | 0 | 3.448035  | 1.468758  | 0.273023  |
| 19 | 6 | 0 | 2.437535  | -0.676231 | -0.233680 |
| 20 | 6 | 0 | 4.697094  | 0.882847  | 0.306072  |
| 21 | 1 | 0 | 3.345246  | 2.532675  | 0.456191  |
| 22 | 6 | 0 | 3.687594  | -1.267262 | -0.192573 |
| 23 | 1 | 0 | 1.580530  | -1.288804 | -0.477308 |
| 24 | 6 | 0 | 4.802608  | -0.485517 | 0.079563  |
| 25 | 1 | 0 | 5.580922  | 1.471568  | 0.513137  |
| 26 | 1 | 0 | 3.801065  | -2.326384 | -0.382511 |
| 27 | 8 | 0 | -5.906770 | -2.039570 | -0.075095 |
| 28 | 6 | 0 | -7.058816 | -1.699267 | 0.679171  |
| 29 | 1 | 0 | -7.776093 | -2.500231 | 0.510737  |
| 30 | 1 | 0 | -6.827681 | -1.639474 | 1.746850  |
| 31 | 1 | 0 | -7.487329 | -0.751806 | 0.339400  |
| 32 | 1 | 0 | -0.571009 | 3.360922  | -0.381601 |
| 33 | 8 | 0 | -2.562929 | 3.367607  | -0.460673 |
| 34 | 7 | 0 | 6.119798  | -1.114699 | 0.119319  |
| 35 | 8 | 0 | 6.188019  | -2.314564 | -0.068241 |
| 36 | 8 | 0 | 7.085282  | -0.408296 | 0.339203  |

### Structure 37d (DMSO)

Energy (Hartrees): -1028.30272824  
No imaginary frequencies

Standard orientation:

| Center<br>Number | Atomic<br>Number | Atomic<br>Type | Coordinates (Angstroms) |           |           |
|------------------|------------------|----------------|-------------------------|-----------|-----------|
|                  |                  |                | X                       | Y         | Z         |
| 1                | 6                | 0              | -3.703945               | 0.821136  | 0.639032  |
| 2                | 6                | 0              | -4.837321               | 0.011276  | 0.680002  |
| 3                | 6                | 0              | -4.865049               | -1.175188 | -0.054791 |
| 4                | 6                | 0              | -3.754774               | -1.532707 | -0.825324 |
| 5                | 6                | 0              | -2.638405               | -0.713093 | -0.859345 |
| 6                | 6                | 0              | -2.584754               | 0.476917  | -0.120425 |
| 7                | 1                | 0              | -3.695209               | 1.734787  | 1.221453  |
| 8                | 1                | 0              | -5.680580               | 0.313494  | 1.287391  |
| 9                | 1                | 0              | -3.789010               | -2.450168 | -1.401848 |
| 10               | 1                | 0              | -1.794439               | -0.997803 | -1.479600 |
| 11               | 6                | 0              | -1.370961               | 1.332204  | -0.134627 |
| 12               | 6                | 0              | -0.147123               | 0.741191  | -0.023124 |
| 13               | 6                | 0              | -1.508184               | 2.774658  | -0.319572 |
| 14               | 1                | 0              | -0.117255               | -0.336822 | 0.088785  |
| 15               | 7                | 0              | 1.075788                | 1.339933  | -0.007898 |
| 16               | 1                | 0              | 1.130418                | 2.350452  | 0.031208  |
| 17               | 6                | 0              | 2.302029                | 0.689233  | 0.017637  |
| 18               | 6                | 0              | 3.445185                | 1.466309  | 0.270255  |
| 19               | 6                | 0              | 2.439099                | -0.687251 | -0.217076 |
| 20               | 6                | 0              | 4.696255                | 0.885594  | 0.300870  |
| 21               | 1                | 0              | 3.336397                | 2.530732  | 0.446434  |
| 22               | 6                | 0              | 3.691687                | -1.272426 | -0.178325 |
| 23               | 1                | 0              | 1.584106                | -1.306287 | -0.451619 |
| 24               | 6                | 0              | 4.806288                | -0.484261 | 0.081076  |
| 25               | 1                | 0              | 5.576754                | 1.482087  | 0.499387  |
| 26               | 1                | 0              | 3.804112                | -2.332648 | -0.362652 |
| 27               | 8                | 0              | -5.916992               | -2.030208 | -0.084508 |
| 28               | 6                | 0              | -7.063371               | -1.687760 | 0.681304  |
| 29               | 1                | 0              | -7.785277               | -2.485246 | 0.516446  |
| 30               | 1                | 0              | -6.823256               | -1.631021 | 1.746886  |
| 31               | 1                | 0              | -7.490876               | -0.737430 | 0.348925  |
| 32               | 1                | 0              | -0.575632               | 3.363939  | -0.328951 |
| 33               | 8                | 0              | -2.563860               | 3.357024  | -0.485497 |
| 34               | 7                | 0              | 6.124627                | -1.106207 | 0.113883  |
| 35               | 8                | 0              | 6.198804                | -2.308979 | -0.062728 |
| 36               | 8                | 0              | 7.091662                | -0.393979 | 0.316541  |

### Structure 37d (C<sub>2</sub>H<sub>5</sub>OH)

Energy (Hartrees): -1028.30392776  
No imaginary frequencies

Standard orientation:

| Center<br>Number | Atomic<br>Number | Atomic<br>Type | Coordinates (Angstroms) |           |           |
|------------------|------------------|----------------|-------------------------|-----------|-----------|
|                  |                  |                | X                       | Y         | Z         |
| 1                | 6                | 0              | -3.689512               | 0.808816  | 0.667496  |
| 2                | 6                | 0              | -4.821062               | -0.003510 | 0.708179  |
| 3                | 6                | 0              | -4.853420               | -1.174743 | -0.048214 |
| 4                | 6                | 0              | -3.754214               | -1.518622 | -0.838741 |
| 5                | 6                | 0              | -2.640673               | -0.695444 | -0.874151 |
| 6                | 6                | 0              | -2.581707               | 0.481462  | -0.115526 |
| 7                | 1                | 0              | -3.673254               | 1.709285  | 1.270878  |
| 8                | 1                | 0              | -5.657338               | 0.285297  | 1.331427  |
| 9                | 1                | 0              | -3.795243               | -2.427060 | -1.429305 |
| 10               | 1                | 0              | -1.804337               | -0.966452 | -1.510577 |
| 11               | 6                | 0              | -1.370530               | 1.341817  | -0.136582 |
| 12               | 6                | 0              | -0.143747               | 0.753234  | -0.022256 |
| 13               | 6                | 0              | -1.509876               | 2.775335  | -0.337736 |
| 14               | 1                | 0              | -0.114992               | -0.323978 | 0.098042  |
| 15               | 7                | 0              | 1.077382                | 1.350289  | -0.010426 |
| 16               | 1                | 0              | 1.134042                | 2.360953  | 0.028422  |
| 17               | 6                | 0              | 2.303129                | 0.696163  | 0.013994  |
| 18               | 6                | 0              | 3.446411                | 1.467857  | 0.279947  |
| 19               | 6                | 0              | 2.435234                | -0.677583 | -0.236991 |
| 20               | 6                | 0              | 4.694897                | 0.882462  | 0.313645  |
| 21               | 1                | 0              | 3.340738                | 2.531065  | 0.465306  |
| 22               | 6                | 0              | 3.684497                | -1.268160 | -0.198215 |
| 23               | 1                | 0              | 1.578812                | -1.289795 | -0.484119 |
| 24               | 6                | 0              | 4.799508                | -0.485841 | 0.079256  |
| 25               | 1                | 0              | 5.576331                | 1.473980  | 0.523738  |
| 26               | 1                | 0              | 3.793606                | -2.326665 | -0.394357 |
| 27               | 8                | 0              | -5.908026               | -2.034554 | -0.081759 |
| 28               | 6                | 0              | -7.056481               | -1.701986 | 0.688902  |
| 29               | 1                | 0              | -7.776910               | -2.497973 | 0.510755  |
| 30               | 1                | 0              | -6.814851               | -1.661752 | 1.754501  |
| 31               | 1                | 0              | -7.480908               | -0.747197 | 0.366683  |
| 32               | 1                | 0              | -0.584177               | 3.372168  | -0.357749 |
| 33               | 8                | 0              | -2.572945               | 3.354287  | -0.508929 |
| 34               | 7                | 0              | 6.110609                | -1.112425 | 0.117760  |
| 35               | 8                | 0              | 6.192885                | -2.304803 | -0.120709 |
| 36               | 8                | 0              | 7.076564                | -0.420488 | 0.388518  |

### Structure 37g (vacuum)

Energy (Hartrees): -1028.27368474  
No imaginary frequencies

Standard orientation:

| Center<br>Number | Atomic<br>Number | Atomic<br>Type | Coordinates (Angstroms) |           |           |
|------------------|------------------|----------------|-------------------------|-----------|-----------|
|                  |                  |                | X                       | Y         | Z         |
| 1                | 6                | 0              | -2.844948               | -0.437372 | -0.797102 |
| 2                | 6                | 0              | -4.007297               | -1.205578 | -0.780789 |
| 3                | 6                | 0              | -5.034344               | -0.876461 | 0.101304  |
| 4                | 6                | 0              | -4.880072               | 0.212081  | 0.963600  |
| 5                | 6                | 0              | -3.713296               | 0.954325  | 0.945349  |
| 6                | 6                | 0              | -2.673221               | 0.649421  | 0.056976  |
| 7                | 1                | 0              | -2.066535               | -0.684173 | -1.511784 |
| 8                | 1                | 0              | -4.100168               | -2.038018 | -1.464821 |
| 9                | 1                | 0              | -5.684979               | 0.442170  | 1.650751  |
| 10               | 1                | 0              | -3.593370               | 1.773842  | 1.645685  |
| 11               | 6                | 0              | -1.428188               | 1.452295  | 0.018750  |
| 12               | 6                | 0              | -1.473429               | 2.815193  | 0.009155  |
| 13               | 6                | 0              | -0.150685               | 0.782214  | -0.014829 |

|    |   |   |           |           |           |
|----|---|---|-----------|-----------|-----------|
| 14 | 1 | 0 | -2.422638 | 3.343885  | 0.020851  |
| 15 | 1 | 0 | -0.161170 | -0.312261 | 0.036224  |
| 16 | 8 | 0 | -0.426511 | 3.612674  | -0.027768 |
| 17 | 1 | 0 | 0.384766  | 3.039245  | -0.071582 |
| 18 | 7 | 0 | 0.967515  | 1.421194  | -0.101427 |
| 19 | 6 | 0 | 2.174968  | 0.709770  | -0.038452 |
| 20 | 6 | 0 | 2.371839  | -0.339420 | 0.868415  |
| 21 | 6 | 0 | 3.221656  | 1.100758  | -0.881494 |
| 22 | 6 | 0 | 3.582692  | -1.012619 | 0.908496  |
| 23 | 1 | 0 | 1.583884  | -0.603721 | 1.563075  |
| 24 | 6 | 0 | 4.431739  | 0.429584  | -0.853939 |
| 25 | 1 | 0 | 3.061897  | 1.925961  | -1.564105 |
| 26 | 6 | 0 | 4.590443  | -0.620878 | 0.040694  |
| 27 | 1 | 0 | 3.759394  | -1.820714 | 1.605316  |
| 28 | 1 | 0 | 5.249648  | 0.704632  | -1.505983 |
| 29 | 8 | 0 | -6.208015 | -1.549926 | 0.200093  |
| 30 | 6 | 0 | -6.399047 | -2.666639 | -0.643438 |
| 31 | 1 | 0 | -5.640632 | -3.434437 | -0.460909 |
| 32 | 1 | 0 | -7.381726 | -3.063798 | -0.399652 |
| 33 | 1 | 0 | -6.376804 | -2.373850 | -1.697867 |
| 34 | 7 | 0 | 5.879541  | -1.333555 | 0.080118  |
| 35 | 8 | 0 | 6.740846  | -0.979014 | -0.696114 |
| 36 | 8 | 0 | 5.999452  | -2.232771 | 0.884764  |

### Structure 37g (CHCl<sub>3</sub>)

Energy (Hartrees): -1028.29818551

No imaginary frequencies

Standard orientation:

| Center<br>Number | Atomic<br>Number | Atomic<br>Type | Coordinates (Angstroms) |           |           |
|------------------|------------------|----------------|-------------------------|-----------|-----------|
|                  |                  |                | X                       | Y         | Z         |
| 1                | 6                | 0              | -2.832188               | -0.497477 | -0.733532 |
| 2                | 6                | 0              | -4.007175               | -1.247719 | -0.722710 |
| 3                | 6                | 0              | -5.069249               | -0.847639 | 0.086581  |
| 4                | 6                | 0              | -4.938002               | 0.294966  | 0.881405  |
| 5                | 6                | 0              | -3.759181               | 1.020104  | 0.870460  |
| 6                | 6                | 0              | -2.682358               | 0.642524  | 0.055038  |
| 7                | 1                | 0              | -2.024588               | -0.806891 | -1.389192 |
| 8                | 1                | 0              | -4.081210               | -2.123846 | -1.353123 |
| 9                | 1                | 0              | -5.768431               | 0.586014  | 1.514346  |
| 10               | 1                | 0              | -3.663964               | 1.885139  | 1.518415  |
| 11               | 6                | 0              | -1.425990               | 1.429833  | 0.023246  |
| 12               | 6                | 0              | -1.459471               | 2.793215  | 0.002927  |
| 13               | 6                | 0              | -0.153879               | 0.747110  | 0.002168  |
| 14               | 1                | 0              | -2.400691               | 3.336169  | -0.000197 |
| 15               | 1                | 0              | -0.166113               | -0.345771 | 0.055765  |
| 16               | 8                | 0              | -0.398038               | 3.576914  | -0.029861 |
| 17               | 1                | 0              | 0.406783                | 2.986612  | -0.065473 |
| 18               | 7                | 0              | 0.965430                | 1.386437  | -0.082528 |
| 19               | 6                | 0              | 2.177779                | 0.685204  | -0.023594 |
| 20               | 6                | 0              | 2.377621                | -0.391327 | 0.851126  |
| 21               | 6                | 0              | 3.227999                | 1.119602  | -0.842427 |
| 22               | 6                | 0              | 3.597700                | -1.046437 | 0.882966  |
| 23               | 1                | 0              | 1.585926                | -0.697275 | 1.524363  |
| 24               | 6                | 0              | 4.447147                | 0.466115  | -0.824355 |
| 25               | 1                | 0              | 3.066006                | 1.965394  | -1.499673 |
| 26               | 6                | 0              | 4.610549                | -0.611003 | 0.039086  |
| 27               | 1                | 0              | 3.769063                | -1.874889 | 1.557228  |
| 28               | 1                | 0              | 5.262345                | 0.781338  | -1.461873 |
| 29               | 8                | 0              | -6.255130               | -1.501318 | 0.173610  |
| 30               | 6                | 0              | -6.421803               | -2.675079 | -0.604915 |
| 31               | 1                | 0              | -5.683520               | -3.436104 | -0.334764 |
| 32               | 1                | 0              | -7.420275               | -3.045264 | -0.380318 |
| 33               | 1                | 0              | -6.349531               | -2.453203 | -1.673848 |
| 34               | 7                | 0              | 5.902519                | -1.305179 | 0.068833  |
| 35               | 8                | 0              | 6.761696                | -0.946892 | -0.712113 |
| 36               | 8                | 0              | 6.048416                | -2.205975 | 0.871288  |

## Structure 37g (DMSO)

Energy (Hartrees):  
No imaginary frequencies

Standard orientation:

| Center<br>Number | Atomic<br>Number | Atomic<br>Type | Coordinates (Angstroms) |           |           |
|------------------|------------------|----------------|-------------------------|-----------|-----------|
|                  |                  |                | X                       | Y         | Z         |
| 1                | 6                | 0              | -2.844948               | -0.437372 | -0.797102 |
| 2                | 6                | 0              | -4.007297               | -1.205578 | -0.780789 |
| 3                | 6                | 0              | -5.034344               | -0.876461 | 0.101304  |
| 4                | 6                | 0              | -4.880072               | 0.212081  | 0.963600  |
| 5                | 6                | 0              | -3.713296               | 0.954325  | 0.945349  |
| 6                | 6                | 0              | -2.673221               | 0.649421  | 0.056976  |
| 7                | 1                | 0              | -2.066535               | -0.684173 | -1.511784 |
| 8                | 1                | 0              | -4.100168               | -2.038018 | -1.464821 |
| 9                | 1                | 0              | -5.684979               | 0.442170  | 1.650751  |
| 10               | 1                | 0              | -3.593370               | 1.773842  | 1.645685  |
| 11               | 6                | 0              | -1.428188               | 1.452295  | 0.018750  |
| 12               | 6                | 0              | -1.473429               | 2.815193  | 0.009155  |
| 13               | 6                | 0              | -0.150685               | 0.782214  | -0.014829 |
| 14               | 1                | 0              | -2.422638               | 3.343885  | 0.020851  |
| 15               | 1                | 0              | -0.161170               | -0.312261 | 0.036224  |
| 16               | 8                | 0              | -0.426511               | 3.612674  | -0.027768 |
| 17               | 1                | 0              | 0.384766                | 3.039245  | -0.071582 |
| 18               | 7                | 0              | 0.967515                | 1.421194  | -0.101427 |
| 19               | 6                | 0              | 2.174968                | 0.709770  | -0.038452 |
| 20               | 6                | 0              | 2.371839                | -0.339420 | 0.868415  |
| 21               | 6                | 0              | 3.221656                | 1.100758  | -0.881494 |
| 22               | 6                | 0              | 3.582692                | -1.012619 | 0.908496  |
| 23               | 1                | 0              | 1.583884                | -0.603721 | 1.563075  |
| 24               | 6                | 0              | 4.431739                | 0.429584  | -0.853939 |
| 25               | 1                | 0              | 3.061897                | 1.925961  | -1.564105 |
| 26               | 6                | 0              | 4.590443                | -0.620878 | 0.040694  |
| 27               | 1                | 0              | 3.759394                | -1.820714 | 1.605316  |
| 28               | 1                | 0              | 5.249648                | 0.704632  | -1.505983 |
| 29               | 8                | 0              | -6.208015               | -1.549926 | 0.200093  |
| 30               | 6                | 0              | -6.399047               | -2.666639 | -0.643438 |
| 31               | 1                | 0              | -5.640632               | -3.434437 | -0.460909 |
| 32               | 1                | 0              | -7.381726               | -3.063798 | -0.399652 |
| 33               | 1                | 0              | -6.376804               | -2.373850 | -1.697867 |
| 34               | 7                | 0              | 5.879541                | -1.333555 | 0.080118  |
| 35               | 8                | 0              | 6.740846                | -0.979014 | -0.696114 |
| 36               | 8                | 0              | 5.999452                | -2.232771 | 0.884764  |

## Structure 37g (C<sub>2</sub>H<sub>5</sub>OH)

Energy (Hartrees): -1028.29684772  
No imaginary frequencies

Standard orientation:

| Center<br>Number | Atomic<br>Number | Atomic<br>Type | Coordinates (Angstroms) |           |           |
|------------------|------------------|----------------|-------------------------|-----------|-----------|
|                  |                  |                | X                       | Y         | Z         |
| 1                | 6                | 0              | -2.829206               | -0.493792 | -0.737741 |
| 2                | 6                | 0              | -4.002646               | -1.246815 | -0.723831 |
| 3                | 6                | 0              | -5.061745               | -0.848370 | 0.089363  |
| 4                | 6                | 0              | -4.932597               | 0.294269  | 0.883523  |
| 5                | 6                | 0              | -3.755539               | 1.023423  | 0.868723  |
| 6                | 6                | 0              | -2.680477               | 0.647426  | 0.050368  |
| 7                | 1                | 0              | -2.022517               | -0.804618 | -1.393945 |
| 8                | 1                | 0              | -4.075932               | -2.124269 | -1.352803 |
| 9                | 1                | 0              | -5.760876               | 0.585601  | 1.519852  |
| 10               | 1                | 0              | -3.662907               | 1.889731  | 1.515401  |
| 11               | 6                | 0              | -1.424931               | 1.436409  | 0.016971  |
| 12               | 6                | 0              | -1.462883               | 2.798149  | 0.019472  |



|    |   |   |           |           |           |
|----|---|---|-----------|-----------|-----------|
| 13 | 6 | 0 | -0.153086 | 0.750628  | -0.019203 |
| 14 | 1 | 0 | -2.403094 | 3.342063  | 0.033675  |
| 15 | 1 | 0 | -0.167801 | -0.342300 | 0.023331  |
| 16 | 8 | 0 | -0.398914 | 3.587076  | -0.007471 |
| 17 | 1 | 0 | 0.409237  | 3.003608  | -0.059667 |
| 18 | 7 | 0 | 0.966392  | 1.389555  | -0.100575 |
| 19 | 6 | 0 | 2.175235  | 0.682871  | -0.042234 |
| 20 | 6 | 0 | 2.366123  | -0.396321 | 0.831971  |
| 21 | 6 | 0 | 3.231480  | 1.117297  | -0.853731 |
| 22 | 6 | 0 | 3.584767  | -1.052005 | 0.873935  |
| 23 | 1 | 0 | 1.567835  | -0.704052 | 1.496827  |
| 24 | 6 | 0 | 4.449246  | 0.462676  | -0.827460 |
| 25 | 1 | 0 | 3.078141  | 1.964422  | -1.511491 |
| 26 | 6 | 0 | 4.604943  | -0.614787 | 0.038303  |
| 27 | 1 | 0 | 3.745317  | -1.881631 | 1.549645  |
| 28 | 1 | 0 | 5.267384  | 0.781498  | -1.459626 |
| 29 | 8 | 0 | -6.248739 | -1.508283 | 0.179971  |
| 30 | 6 | 0 | -6.412518 | -2.685895 | -0.600594 |
| 31 | 1 | 0 | -5.667652 | -3.440269 | -0.332420 |
| 32 | 1 | 0 | -7.408210 | -3.060470 | -0.370840 |
| 33 | 1 | 0 | -6.344852 | -2.460431 | -1.668479 |
| 34 | 7 | 0 | 5.892814  | -1.303666 | 0.080927  |
| 35 | 8 | 0 | 6.758984  | -0.960794 | -0.702334 |
| 36 | 8 | 0 | 6.045479  | -2.193135 | 0.897467  |

### Structure 38a (vacuum)

Energy (Hartrees): -1118.25856014  
 No imaginary frequencies

Standard orientation:

| Center<br>Number | Atomic<br>Number | Atomic<br>Type | Coordinates (Angstroms) |           |           |
|------------------|------------------|----------------|-------------------------|-----------|-----------|
|                  |                  |                | X                       | Y         | Z         |
| 1                | 6                | 0              | -3.490931               | 1.197747  | 0.621422  |
| 2                | 6                | 0              | -4.706284               | 0.538893  | 0.720384  |
| 3                | 6                | 0              | -4.851537               | -0.682025 | 0.079664  |
| 4                | 6                | 0              | -3.829381               | -1.253822 | -0.662342 |
| 5                | 6                | 0              | -2.626496               | -0.573101 | -0.765772 |
| 6                | 6                | 0              | -2.431492               | 0.655087  | -0.118914 |
| 7                | 1                | 0              | -3.354179               | 2.133354  | 1.150712  |
| 8                | 1                | 0              | -5.528534               | 0.944885  | 1.293993  |
| 9                | 1                | 0              | -3.993126               | -2.201465 | -1.157769 |
| 10               | 1                | 0              | -1.836168               | -0.985641 | -1.382252 |
| 11               | 6                | 0              | -1.143501               | 1.371024  | -0.206627 |
| 12               | 6                | 0              | 0.037245                | 0.683373  | -0.121779 |
| 13               | 6                | 0              | -1.141765               | 2.819429  | -0.371119 |
| 14               | 1                | 0              | 0.012671                | -0.389866 | 0.034705  |
| 15               | 1                | 0              | -2.132634               | 3.292221  | -0.482031 |
| 16               | 8                | 0              | -0.136642               | 3.510942  | -0.411632 |
| 17               | 7                | 0              | 1.261238                | 1.245818  | -0.173544 |
| 18               | 1                | 0              | 1.262789                | 2.262819  | -0.246876 |
| 19               | 6                | 0              | 2.485531                | 0.580982  | -0.085558 |
| 20               | 6                | 0              | 3.627107                | 1.352080  | 0.168237  |
| 21               | 6                | 0              | 2.607152                | -0.801940 | -0.260175 |
| 22               | 6                | 0              | 4.870142                | 0.754462  | 0.259976  |
| 23               | 1                | 0              | 3.527654                | 2.423123  | 0.301694  |
| 24               | 6                | 0              | 3.849934                | -1.405353 | -0.160029 |
| 25               | 1                | 0              | 1.747370                | -1.413078 | -0.499166 |
| 26               | 6                | 0              | 4.962976                | -0.621029 | 0.099988  |
| 27               | 1                | 0              | 5.762044                | 1.332717  | 0.460244  |
| 28               | 1                | 0              | 3.968605                | -2.472150 | -0.294597 |
| 29               | 7                | 0              | -6.138935               | -1.395058 | 0.186448  |
| 30               | 8                | 0              | -6.235140               | -2.464031 | -0.376597 |
| 31               | 8                | 0              | -7.018693               | -0.867162 | 0.831297  |
| 32               | 7                | 0              | 6.282360                | -1.265050 | 0.199610  |
| 33               | 8                | 0              | 6.331611                | -2.466736 | 0.046273  |
| 34               | 8                | 0              | 7.236199                | -0.553229 | 0.429360  |

### Structure 38a (CHCl<sub>3</sub>)

Energy (Hartrees): -1118.28825289  
No imaginary frequencies

Standard orientation:

| Center<br>Number | Atomic<br>Number | Atomic<br>Type | Coordinates (Angstroms) |           |           |
|------------------|------------------|----------------|-------------------------|-----------|-----------|
|                  |                  |                | X                       | Y         | Z         |
| 1                | 6                | 0              | -3.525376               | 1.238818  | 0.534194  |
| 2                | 6                | 0              | -4.740339               | 0.579960  | 0.626281  |
| 3                | 6                | 0              | -4.849712               | -0.690069 | 0.077369  |
| 4                | 6                | 0              | -3.786058               | -1.311863 | -0.563474 |
| 5                | 6                | 0              | -2.584095               | -0.631478 | -0.662816 |
| 6                | 6                | 0              | -2.427091               | 0.649865  | -0.111604 |
| 7                | 1                | 0              | -3.423549               | 2.213801  | 0.995961  |
| 8                | 1                | 0              | -5.584840               | 1.032135  | 1.129001  |
| 9                | 1                | 0              | -3.908099               | -2.298542 | -0.990567 |
| 10               | 1                | 0              | -1.762518               | -1.094617 | -1.196479 |
| 11               | 6                | 0              | -1.143452               | 1.373057  | -0.198051 |
| 12               | 6                | 0              | 0.043079                | 0.688824  | -0.107281 |
| 13               | 6                | 0              | -1.155261               | 2.814706  | -0.382990 |
| 14               | 1                | 0              | 0.025316                | -0.385343 | 0.042881  |
| 15               | 1                | 0              | -2.144596               | 3.278295  | -0.526895 |
| 16               | 8                | 0              | -0.154204               | 3.520421  | -0.414296 |
| 17               | 7                | 0              | 1.262860                | 1.254786  | -0.144393 |
| 18               | 1                | 0              | 1.279466                | 2.272081  | -0.201924 |
| 19               | 6                | 0              | 2.486754                | 0.588449  | -0.065247 |
| 20               | 6                | 0              | 3.624826                | 1.354419  | 0.221225  |
| 21               | 6                | 0              | 2.608079                | -0.788894 | -0.282341 |
| 22               | 6                | 0              | 4.867483                | 0.755495  | 0.300332  |
| 23               | 1                | 0              | 3.523322                | 2.420766  | 0.388875  |
| 24               | 6                | 0              | 3.849771                | -1.393974 | -0.196386 |
| 25               | 1                | 0              | 1.747288                | -1.390439 | -0.541888 |
| 26               | 6                | 0              | 4.962084                | -0.615794 | 0.095092  |
| 27               | 1                | 0              | 5.751333                | 1.337223  | 0.525878  |
| 28               | 1                | 0              | 3.959693                | -2.456509 | -0.367796 |
| 29               | 7                | 0              | -6.130686               | -1.398978 | 0.178780  |
| 30               | 8                | 0              | -6.198951               | -2.523454 | -0.276593 |
| 31               | 8                | 0              | -7.058731               | -0.826249 | 0.714145  |
| 32               | 7                | 0              | 6.275250                | -1.258465 | 0.177988  |
| 33               | 8                | 0              | 6.334499                | -2.460733 | 0.009385  |
| 34               | 8                | 0              | 7.240021                | -0.557407 | 0.411174  |

### Structure 38a (DMSO)

Energy (Hartrees): -1118.28952857  
No imaginary frequencies

Standard orientation:

| Center<br>Number | Atomic<br>Number | Atomic<br>Type | Coordinates (Angstroms) |           |           |
|------------------|------------------|----------------|-------------------------|-----------|-----------|
|                  |                  |                | X                       | Y         | Z         |
| 1                | 6                | 0              | -3.519215               | 1.207914  | 0.608905  |
| 2                | 6                | 0              | -4.735080               | 0.547795  | 0.672478  |
| 3                | 6                | 0              | -4.856931               | -0.681817 | 0.039050  |
| 4                | 6                | 0              | -3.804004               | -1.261883 | -0.656947 |
| 5                | 6                | 0              | -2.599108               | -0.582388 | -0.722599 |
| 6                | 6                | 0              | -2.431101               | 0.657929  | -0.087034 |
| 7                | 1                | 0              | -3.409522               | 2.151845  | 1.129938  |
| 8                | 1                | 0              | -5.569910               | 0.971589  | 1.214438  |
| 9                | 1                | 0              | -3.931948               | -2.216704 | -1.149656 |
| 10               | 1                | 0              | -1.784546               | -1.012488 | -1.293643 |
| 11               | 6                | 0              | -1.143588               | 1.376672  | -0.139057 |
| 12               | 6                | 0              | 0.035062                | 0.673966  | -0.090428 |
| 13               | 6                | 0              | -1.150905               | 2.825227  | -0.252468 |

|    |   |   |           |           |           |
|----|---|---|-----------|-----------|-----------|
| 14 | 1 | 0 | 0.001630  | -0.405464 | 0.004493  |
| 15 | 1 | 0 | -2.141395 | 3.296839  | -0.355394 |
| 16 | 8 | 0 | -0.148237 | 3.530063  | -0.268049 |
| 17 | 7 | 0 | 1.260149  | 1.227507  | -0.128886 |
| 18 | 1 | 0 | 1.290037  | 2.243684  | -0.199153 |
| 19 | 6 | 0 | 2.481761  | 0.560968  | -0.054172 |
| 20 | 6 | 0 | 3.639879  | 1.352836  | -0.052820 |
| 21 | 6 | 0 | 2.589034  | -0.833938 | 0.014537  |
| 22 | 6 | 0 | 4.888239  | 0.767037  | 0.015972  |
| 23 | 1 | 0 | 3.547071  | 2.431897  | -0.104840 |
| 24 | 6 | 0 | 3.838835  | -1.423423 | 0.083340  |
| 25 | 1 | 0 | 1.714038  | -1.469464 | 0.012086  |
| 26 | 6 | 0 | 4.971857  | -0.619274 | 0.083210  |
| 27 | 1 | 0 | 5.784198  | 1.373317  | 0.018055  |
| 28 | 1 | 0 | 3.933846  | -2.499853 | 0.135192  |
| 29 | 7 | 0 | -6.138578 | -1.390314 | 0.107190  |
| 30 | 8 | 0 | -6.240639 | -2.448854 | -0.483260 |
| 31 | 8 | 0 | -7.038699 | -0.885818 | 0.751283  |
| 32 | 7 | 0 | 6.288369  | -1.249371 | 0.153617  |
| 33 | 8 | 0 | 6.342002  | -2.464649 | 0.194124  |
| 34 | 8 | 0 | 7.269138  | -0.528954 | 0.167558  |

### Structure 38a (C<sub>2</sub>H<sub>5</sub>OH)

Energy (Hartrees): -1118.28807893

No imaginary frequencies

Standard orientation:

| Center<br>Number | Atomic<br>Number | Atomic<br>Type | Coordinates (Angstroms) |           |           |
|------------------|------------------|----------------|-------------------------|-----------|-----------|
|                  |                  |                | X                       | Y         | Z         |
| 1                | 6                | 0              | -3.523960               | 1.240590  | 0.535893  |
| 2                | 6                | 0              | -4.734794               | 0.576156  | 0.632112  |
| 3                | 6                | 0              | -4.840020               | -0.693093 | 0.077771  |
| 4                | 6                | 0              | -3.776470               | -1.307580 | -0.572361 |
| 5                | 6                | 0              | -2.578155               | -0.622308 | -0.673609 |
| 6                | 6                | 0              | -2.425755               | 0.657613  | -0.116475 |
| 7                | 1                | 0              | -3.425038               | 2.214745  | 1.000448  |
| 8                | 1                | 0              | -5.576056               | 1.026509  | 1.142143  |
| 9                | 1                | 0              | -3.891416               | -2.292808 | -1.004993 |
| 10               | 1                | 0              | -1.756270               | -1.081716 | -1.210368 |
| 11               | 6                | 0              | -1.144616               | 1.384154  | -0.201781 |
| 12               | 6                | 0              | 0.042328                | 0.695464  | -0.112422 |
| 13               | 6                | 0              | -1.162556               | 2.820674  | -0.382827 |
| 14               | 1                | 0              | 0.020029                | -0.379547 | 0.030204  |
| 15               | 1                | 0              | -2.152126               | 3.282594  | -0.522311 |
| 16               | 8                | 0              | -0.160954               | 3.533901  | -0.417349 |
| 17               | 7                | 0              | 1.261267                | 1.257689  | -0.144109 |
| 18               | 1                | 0              | 1.288188                | 2.275220  | -0.194110 |
| 19               | 6                | 0              | 2.482813                | 0.587157  | -0.065969 |
| 20               | 6                | 0              | 3.621928                | 1.354912  | 0.212445  |
| 21               | 6                | 0              | 2.599704                | -0.791754 | -0.277595 |
| 22               | 6                | 0              | 4.863366                | 0.755713  | 0.294907  |
| 23               | 1                | 0              | 3.520688                | 2.422639  | 0.371395  |
| 24               | 6                | 0              | 3.840509                | -1.396898 | -0.192196 |
| 25               | 1                | 0              | 1.738144                | -1.395414 | -0.529756 |
| 26               | 6                | 0              | 4.954665                | -0.617577 | 0.094594  |
| 27               | 1                | 0              | 5.746421                | 1.340668  | 0.515996  |
| 28               | 1                | 0              | 3.943786                | -2.460856 | -0.359342 |
| 29               | 7                | 0              | -6.111586               | -1.406057 | 0.183009  |
| 30               | 8                | 0              | -6.187948               | -2.527101 | -0.284947 |
| 31               | 8                | 0              | -7.041963               | -0.849107 | 0.735670  |
| 32               | 7                | 0              | 6.261341                | -1.259176 | 0.180523  |
| 33               | 8                | 0              | 6.333704                | -2.456527 | -0.028479 |
| 34               | 8                | 0              | 7.226232                | -0.570986 | 0.458833  |

### Structure 38b (vacuum)

Energy (Hartrees): -1118.25212654  
No imaginary frequencies

Standard orientation:

| Center<br>Number | Atomic<br>Number | Atomic<br>Type | Coordinates (Angstroms) |           |           |
|------------------|------------------|----------------|-------------------------|-----------|-----------|
|                  |                  |                | X                       | Y         | Z         |
| 1                | 6                | 0              | 3.307789                | 1.094243  | -0.858581 |
| 2                | 6                | 0              | 4.346391                | 0.176432  | -0.901350 |
| 3                | 6                | 0              | 4.338439                | -0.871778 | 0.005849  |
| 4                | 6                | 0              | 3.340179                | -1.024730 | 0.955922  |
| 5                | 6                | 0              | 2.313464                | -0.092253 | 0.991405  |
| 6                | 6                | 0              | 2.276103                | 0.973983  | 0.081606  |
| 7                | 1                | 0              | 3.284749                | 1.906906  | -1.575473 |
| 8                | 1                | 0              | 5.146930                | 0.254857  | -1.624568 |
| 9                | 1                | 0              | 3.388185                | -1.848777 | 1.655219  |
| 10               | 1                | 0              | 1.548403                | -0.168864 | 1.756796  |
| 11               | 6                | 0              | 1.190824                | 1.974053  | 0.112154  |
| 12               | 6                | 0              | -0.129490               | 1.668494  | 0.112676  |
| 13               | 6                | 0              | 1.532402                | 3.410894  | 0.101696  |
| 14               | 1                | 0              | -0.824776               | 2.499753  | 0.127369  |
| 15               | 1                | 0              | 2.617246                | 3.630202  | 0.114465  |
| 16               | 8                | 0              | 0.725643                | 4.309455  | 0.094128  |
| 17               | 7                | 0              | -0.664174               | 0.421715  | 0.052966  |
| 18               | 1                | 0              | -0.018541               | -0.350969 | -0.049403 |
| 19               | 6                | 0              | -2.020769               | 0.096434  | 0.018131  |
| 20               | 6                | 0              | -2.367124               | -1.244041 | -0.198871 |
| 21               | 6                | 0              | -3.029122               | 1.050935  | 0.199548  |
| 22               | 6                | 0              | -3.693547               | -1.629482 | -0.242546 |
| 23               | 1                | 0              | -1.587160               | -1.984016 | -0.340096 |
| 24               | 6                | 0              | -4.358814               | 0.667852  | 0.149322  |
| 25               | 1                | 0              | -2.793909               | 2.089099  | 0.387493  |
| 26               | 6                | 0              | -4.675366               | -0.663837 | -0.070352 |
| 27               | 1                | 0              | -3.977211               | -2.659538 | -0.411581 |
| 28               | 1                | 0              | -5.152561               | 1.390326  | 0.284265  |
| 29               | 7                | 0              | 5.435692                | -1.860460 | -0.035396 |
| 30               | 8                | 0              | 5.389515                | -2.778742 | 0.753777  |
| 31               | 8                | 0              | 6.309712                | -1.689901 | -0.856131 |
| 32               | 7                | 0              | -6.089211               | -1.064753 | -0.121875 |
| 33               | 8                | 0              | -6.923114               | -0.197366 | 0.025406  |
| 34               | 8                | 0              | -6.331215               | -2.238159 | -0.308932 |

### Structure 38b (CHCl<sub>3</sub>)

Energy (Hartrees): -1118.28414516  
No imaginary frequencies

Standard orientation:

| Center<br>Number | Atomic<br>Number | Atomic<br>Type | Coordinates (Angstroms) |           |           |
|------------------|------------------|----------------|-------------------------|-----------|-----------|
|                  |                  |                | X                       | Y         | Z         |
| 1                | 6                | 0              | 3.338281                | 1.108919  | -0.835297 |
| 2                | 6                | 0              | 4.368841                | 0.181954  | -0.864618 |
| 3                | 6                | 0              | 4.320696                | -0.886142 | 0.020026  |
| 4                | 6                | 0              | 3.292125                | -1.048379 | 0.937593  |
| 5                | 6                | 0              | 2.275735                | -0.105960 | 0.961386  |
| 6                | 6                | 0              | 2.277283                | 0.979023  | 0.071943  |
| 7                | 1                | 0              | 3.347763                | 1.935727  | -1.536796 |
| 8                | 1                | 0              | 5.186559                | 0.272944  | -1.567166 |
| 9                | 1                | 0              | 3.300129                | -1.883855 | 1.624956  |
| 10               | 1                | 0              | 1.486359                | -0.195590 | 1.700021  |
| 11               | 6                | 0              | 1.197633                | 1.986597  | 0.095057  |
| 12               | 6                | 0              | -0.129242               | 1.687755  | 0.085181  |
| 13               | 6                | 0              | 1.556021                | 3.409840  | 0.107611  |
| 14               | 1                | 0              | -0.826731               | 2.516979  | 0.113337  |

|    |   |   |           |           |           |
|----|---|---|-----------|-----------|-----------|
| 15 | 1 | 0 | 2.640732  | 3.616498  | 0.146717  |
| 16 | 8 | 0 | 0.763615  | 4.330888  | 0.094160  |
| 17 | 7 | 0 | -0.663575 | 0.447697  | 0.000611  |
| 18 | 1 | 0 | -0.025047 | -0.330479 | -0.125032 |
| 19 | 6 | 0 | -2.017436 | 0.119094  | -0.012714 |
| 20 | 6 | 0 | -2.356029 | -1.221164 | -0.252417 |
| 21 | 6 | 0 | -3.028604 | 1.063310  | 0.209072  |
| 22 | 6 | 0 | -3.678998 | -1.615503 | -0.281154 |
| 23 | 1 | 0 | -1.571003 | -1.949927 | -0.420591 |
| 24 | 6 | 0 | -4.355160 | 0.671175  | 0.175824  |
| 25 | 1 | 0 | -2.797448 | 2.098377  | 0.418074  |
| 26 | 6 | 0 | -4.665900 | -0.659471 | -0.070882 |
| 27 | 1 | 0 | -3.947211 | -2.646705 | -0.467397 |
| 28 | 1 | 0 | -5.144626 | 1.391086  | 0.344947  |
| 29 | 7 | 0 | 5.401392  | -1.883559 | -0.014057 |
| 30 | 8 | 0 | 5.290571  | -2.866123 | 0.690651  |
| 31 | 8 | 0 | 6.346256  | -1.673603 | -0.746531 |
| 32 | 7 | 0 | -6.070035 | -1.068165 | -0.101355 |
| 33 | 8 | 0 | -6.917183 | -0.221425 | 0.106401  |
| 34 | 8 | 0 | -6.320188 | -2.235133 | -0.333072 |

### Structure 38b (DMSO)

Energy (Hartrees): -1118.28635189  
 No imaginary frequencies

Standard orientation:

| Center<br>Number | Atomic<br>Number | Atomic<br>Type | Coordinates (Angstroms) |           |           |
|------------------|------------------|----------------|-------------------------|-----------|-----------|
|                  |                  |                | X                       | Y         | Z         |
| 1                | 6                | 0              | 3.340286                | 1.126539  | -0.809236 |
| 2                | 6                | 0              | 4.379086                | 0.210969  | -0.858583 |
| 3                | 6                | 0              | 4.337849                | -0.880643 | -0.001720 |
| 4                | 6                | 0              | 3.303022                | -1.078503 | 0.902005  |
| 5                | 6                | 0              | 2.276494                | -0.147809 | 0.944648  |
| 6                | 6                | 0              | 2.274326                | 0.962016  | 0.086902  |
| 7                | 1                | 0              | 3.348030                | 1.972515  | -1.487322 |
| 8                | 1                | 0              | 5.197652                | 0.333480  | -1.555108 |
| 9                | 1                | 0              | 3.309372                | -1.933019 | 1.565623  |
| 10               | 1                | 0              | 1.481542                | -0.273097 | 1.671760  |
| 11               | 6                | 0              | 1.192816                | 1.966660  | 0.127105  |
| 12               | 6                | 0              | -0.136955               | 1.672701  | 0.119714  |
| 13               | 6                | 0              | 1.561001                | 3.386153  | 0.143444  |
| 14               | 1                | 0              | -0.831581               | 2.504311  | 0.153562  |
| 15               | 1                | 0              | 2.648246                | 3.581103  | 0.168689  |
| 16               | 8                | 0              | 0.780078                | 4.318398  | 0.146565  |
| 17               | 7                | 0              | -0.677611               | 0.437494  | 0.035411  |
| 18               | 1                | 0              | -0.045391               | -0.350885 | -0.062983 |
| 19               | 6                | 0              | -2.031991               | 0.117092  | 0.007607  |
| 20               | 6                | 0              | -2.370721               | -1.235064 | -0.156430 |
| 21               | 6                | 0              | -3.044873               | 1.077291  | 0.140089  |
| 22               | 6                | 0              | -3.693890               | -1.626159 | -0.194972 |
| 23               | 1                | 0              | -1.583540               | -1.974174 | -0.257095 |
| 24               | 6                | 0              | -4.371432               | 0.688015  | 0.094776  |
| 25               | 1                | 0              | -2.817620               | 2.124856  | 0.281314  |
| 26               | 6                | 0              | -4.682773               | -0.655718 | -0.071973 |
| 27               | 1                | 0              | -3.957332               | -2.667532 | -0.323041 |
| 28               | 1                | 0              | -5.158434               | 1.423885  | 0.193845  |
| 29               | 7                | 0              | 5.430258                | -1.861569 | -0.050245 |
| 30               | 8                | 0              | 5.351236                | -2.841497 | 0.664640  |
| 31               | 8                | 0              | 6.359172                | -1.645064 | -0.803819 |
| 32               | 7                | 0              | -6.084812               | -1.059971 | -0.122185 |
| 33               | 8                | 0              | -6.936048               | -0.191048 | -0.073506 |
| 34               | 8                | 0              | -6.336847               | -2.247583 | -0.212675 |

### Structure 38b (C<sub>2</sub>H<sub>5</sub>OH)

Energy (Hartrees): -1118.28527609

No imaginary frequencies

Standard orientation:

| Center<br>Number | Atomic<br>Number | Atomic<br>Type | Coordinates (Angstroms) |           |           |
|------------------|------------------|----------------|-------------------------|-----------|-----------|
|                  |                  |                | X                       | Y         | Z         |
| 1                | 6                | 0              | 3.322366                | 1.104619  | -0.840653 |
| 2                | 6                | 0              | 4.360226                | 0.187876  | -0.881804 |
| 3                | 6                | 0              | 4.332297                | -0.878324 | 0.007101  |
| 4                | 6                | 0              | 3.314296                | -1.051180 | 0.935176  |
| 5                | 6                | 0              | 2.289655                | -0.118354 | 0.969257  |
| 6                | 6                | 0              | 2.273689                | 0.965649  | 0.079540  |
| 7                | 1                | 0              | 3.316518                | 1.930264  | -1.543654 |
| 8                | 1                | 0              | 5.165704                | 0.288297  | -1.597144 |
| 9                | 1                | 0              | 3.333540                | -1.884626 | 1.625016  |
| 10               | 1                | 0              | 1.507567                | -0.219605 | 1.714049  |
| 11               | 6                | 0              | 1.191085                | 1.970687  | 0.111410  |
| 12               | 6                | 0              | -0.139252               | 1.670987  | 0.109403  |
| 13               | 6                | 0              | 1.553655                | 3.384403  | 0.111989  |
| 14               | 1                | 0              | -0.839263               | 2.498150  | 0.138743  |
| 15               | 1                | 0              | 2.637691                | 3.589046  | 0.131530  |
| 16               | 8                | 0              | 0.766114                | 4.318834  | 0.106952  |
| 17               | 7                | 0              | -0.672105               | 0.434429  | 0.032309  |
| 18               | 1                | 0              | -0.036681               | -0.350425 | -0.076468 |
| 19               | 6                | 0              | -2.027130               | 0.111033  | 0.010797  |
| 20               | 6                | 0              | -2.366143               | -1.232756 | -0.208697 |
| 21               | 6                | 0              | -3.036860               | 1.063925  | 0.203612  |
| 22               | 6                | 0              | -3.689351               | -1.622552 | -0.248529 |
| 23               | 1                | 0              | -1.580829               | -1.966569 | -0.352729 |
| 24               | 6                | 0              | -4.363627               | 0.677612  | 0.156575  |
| 25               | 1                | 0              | -2.806085               | 2.102160  | 0.398632  |
| 26               | 6                | 0              | -4.675655               | -0.657756 | -0.069861 |
| 27               | 1                | 0              | -3.954134               | -2.657167 | -0.421592 |
| 28               | 1                | 0              | -5.149201               | 1.407535  | 0.301010  |
| 29               | 7                | 0              | 5.422028                | -1.857435 | -0.032631 |
| 30               | 8                | 0              | 5.337617                | -2.843850 | 0.673324  |
| 31               | 8                | 0              | 6.363536                | -1.639743 | -0.770659 |
| 32               | 7                | 0              | -6.074385               | -1.058896 | -0.119247 |
| 33               | 8                | 0              | -6.928871               | -0.198564 | -0.004152 |
| 34               | 8                | 0              | -6.333283               | -2.239047 | -0.274503 |

### Structure 38c (vacuum)

Energy (Hartrees): -1118.25347831

No imaginary frequencies

Standard orientation:

| Center<br>Number | Atomic<br>Number | Atomic<br>Type | Coordinates (Angstroms) |           |           |
|------------------|------------------|----------------|-------------------------|-----------|-----------|
|                  |                  |                | X                       | Y         | Z         |
| 1                | 6                | 0              | 3.296559                | 1.058751  | -0.830970 |
| 2                | 6                | 0              | 4.288208                | 0.089750  | -0.843728 |
| 3                | 6                | 0              | 4.196851                | -0.965778 | 0.050730  |
| 4                | 6                | 0              | 3.162041                | -1.079740 | 0.965222  |
| 5                | 6                | 0              | 2.177754                | -0.101986 | 0.967368  |
| 6                | 6                | 0              | 2.223990                | 0.968001  | 0.063856  |
| 7                | 1                | 0              | 3.353993                | 1.897798  | -1.511396 |
| 8                | 1                | 0              | 5.123249                | 0.139664  | -1.529352 |
| 9                | 1                | 0              | 3.147027                | -1.909704 | 1.658620  |
| 10               | 1                | 0              | 1.379217                | -0.150628 | 1.699967  |
| 11               | 6                | 0              | 1.164592                | 1.998856  | 0.064872  |
| 12               | 6                | 0              | -0.160459               | 1.714694  | 0.048791  |
| 13               | 6                | 0              | 1.517092                | 3.425362  | 0.033133  |

|    |   |   |           |           |           |
|----|---|---|-----------|-----------|-----------|
| 14 | 1 | 0 | -0.869002 | 2.536135  | 0.056779  |
| 15 | 7 | 0 | -0.709473 | 0.471657  | -0.036299 |
| 16 | 1 | 0 | -0.072853 | -0.297091 | -0.205307 |
| 17 | 6 | 0 | -2.069434 | 0.164931  | -0.032957 |
| 18 | 6 | 0 | -2.462458 | -1.104807 | -0.477186 |
| 19 | 6 | 0 | -3.037131 | 1.072115  | 0.415010  |
| 20 | 6 | 0 | -3.797679 | -1.460852 | -0.490514 |
| 21 | 1 | 0 | -1.713233 | -1.807062 | -0.825000 |
| 22 | 6 | 0 | -4.376945 | 0.722266  | 0.390383  |
| 23 | 1 | 0 | -2.754936 | 2.039808  | 0.806643  |
| 24 | 6 | 0 | -4.740349 | -0.536375 | -0.062456 |
| 25 | 1 | 0 | -4.119594 | -2.434955 | -0.833400 |
| 26 | 1 | 0 | -5.140772 | 1.407507  | 0.732882  |
| 27 | 8 | 0 | 2.638547  | 3.862222  | -0.035493 |
| 28 | 1 | 0 | 0.645883  | 4.110433  | 0.078279  |
| 29 | 7 | 0 | 5.247528  | -2.005808 | 0.037245  |
| 30 | 8 | 0 | 5.128205  | -2.929564 | 0.812736  |
| 31 | 8 | 0 | 6.157665  | -1.870201 | -0.749895 |
| 32 | 7 | 0 | -6.164090 | -0.905888 | -0.079202 |
| 33 | 8 | 0 | -6.962148 | -0.074948 | 0.298031  |
| 34 | 8 | 0 | -6.448834 | -2.017855 | -0.469159 |

### Structure 38c (CHCl<sub>3</sub>)

Energy (Hartrees): -1118.28651974

No imaginary frequencies

Standard orientation:

| Center<br>Number | Atomic<br>Number | Atomic<br>Type | Coordinates (Angstroms) |           |           |
|------------------|------------------|----------------|-------------------------|-----------|-----------|
|                  |                  |                | X                       | Y         | Z         |
| 1                | 6                | 0              | 3.297022                | 1.049531  | -0.846171 |
| 2                | 6                | 0              | 4.300396                | 0.093573  | -0.849039 |
| 3                | 6                | 0              | 4.213486                | -0.958914 | 0.051782  |
| 4                | 6                | 0              | 3.170795                | -1.081747 | 0.958218  |
| 5                | 6                | 0              | 2.177295                | -0.114078 | 0.951203  |
| 6                | 6                | 0              | 2.221645                | 0.954694  | 0.046110  |
| 7                | 1                | 0              | 3.344768                | 1.877776  | -1.541575 |
| 8                | 1                | 0              | 5.132640                | 0.155086  | -1.537504 |
| 9                | 1                | 0              | 3.148877                | -1.906766 | 1.657711  |
| 10               | 1                | 0              | 1.371073                | -0.175205 | 1.674553  |
| 11               | 6                | 0              | 1.160048                | 1.983709  | 0.040806  |
| 12               | 6                | 0              | -0.170729               | 1.704204  | 0.009894  |
| 13               | 6                | 0              | 1.506707                | 3.402425  | 0.053922  |
| 14               | 1                | 0              | -0.872594               | 2.531317  | 0.020596  |
| 15               | 7                | 0              | -0.721365               | 0.470065  | -0.088183 |
| 16               | 1                | 0              | -0.097324               | -0.311537 | -0.258071 |
| 17               | 6                | 0              | -2.081292               | 0.168591  | -0.066670 |
| 18               | 6                | 0              | -2.477494               | -1.104103 | -0.502931 |
| 19               | 6                | 0              | -3.042912               | 1.078696  | 0.391966  |
| 20               | 6                | 0              | -3.811543               | -1.461127 | -0.497699 |
| 21               | 1                | 0              | -1.730410               | -1.806137 | -0.856282 |
| 22               | 6                | 0              | -4.381434               | 0.727630  | 0.386670  |
| 23               | 1                | 0              | -2.758537               | 2.048541  | 0.777495  |
| 24               | 6                | 0              | -4.750440               | -0.534530 | -0.058851 |
| 25               | 1                | 0              | -4.126137               | -2.439579 | -0.835379 |
| 26               | 1                | 0              | -5.132497               | 1.421023  | 0.741132  |
| 27               | 8                | 0              | 2.635040                | 3.849172  | 0.048597  |
| 28               | 1                | 0              | 0.636915                | 4.086011  | 0.082154  |
| 29               | 7                | 0              | 5.270649                | -1.982882 | 0.049311  |
| 30               | 8                | 0              | 5.126219                | -2.951145 | 0.767980  |
| 31               | 8                | 0              | 6.230098                | -1.808156 | -0.673279 |
| 32               | 7                | 0              | -6.166559               | -0.902787 | -0.053961 |
| 33               | 8                | 0              | -6.973383               | -0.065079 | 0.299500  |
| 34               | 8                | 0              | -6.466118               | -2.027620 | -0.404081 |

### Structure 38c (DMSO)

Energy (Hartrees): -1118.28958379  
No imaginary frequencies

Standard orientation:

| Center<br>Number | Atomic<br>Number | Atomic<br>Type | Coordinates (Angstroms) |           |           |
|------------------|------------------|----------------|-------------------------|-----------|-----------|
|                  |                  |                | X                       | Y         | Z         |
| 1                | 6                | 0              | 3.264938                | 1.058002  | -0.845190 |
| 2                | 6                | 0              | 4.270942                | 0.107073  | -0.895102 |
| 3                | 6                | 0              | 4.218619                | -0.957323 | -0.004421 |
| 4                | 6                | 0              | 3.204284                | -1.097846 | 0.931193  |
| 5                | 6                | 0              | 2.208340                | -0.132691 | 0.971921  |
| 6                | 6                | 0              | 2.220645                | 0.949239  | 0.082507  |
| 7                | 1                | 0              | 3.283534                | 1.890626  | -1.536961 |
| 8                | 1                | 0              | 5.076470                | 0.183270  | -1.613227 |
| 9                | 1                | 0              | 3.201299                | -1.934111 | 1.617562  |
| 10               | 1                | 0              | 1.423975                | -0.212725 | 1.717051  |
| 11               | 6                | 0              | 1.162664                | 1.980687  | 0.120673  |
| 12               | 6                | 0              | -0.172807               | 1.712984  | 0.097987  |
| 13               | 6                | 0              | 1.515936                | 3.394939  | 0.166512  |
| 14               | 1                | 0              | -0.861262               | 2.549829  | 0.133859  |
| 15               | 7                | 0              | -0.734382               | 0.486518  | 0.002549  |
| 16               | 1                | 0              | -0.114287               | -0.312301 | -0.088325 |
| 17               | 6                | 0              | -2.093707               | 0.189646  | -0.017513 |
| 18               | 6                | 0              | -2.455666               | -1.158894 | -0.159603 |
| 19               | 6                | 0              | -3.090224               | 1.168459  | 0.103274  |
| 20               | 6                | 0              | -3.785118               | -1.528773 | -0.183834 |
| 21               | 1                | 0              | -1.680678               | -1.911787 | -0.252713 |
| 22               | 6                | 0              | -4.423255               | 0.800219  | 0.073205  |
| 23               | 1                | 0              | -2.846182               | 2.214937  | 0.223060  |
| 24               | 6                | 0              | -4.757485               | -0.540671 | -0.069113 |
| 25               | 1                | 0              | -4.067044               | -2.567456 | -0.292929 |
| 26               | 1                | 0              | -5.197367               | 1.550607  | 0.165148  |
| 27               | 8                | 0              | 2.647443                | 3.839709  | 0.189390  |
| 28               | 1                | 0              | 0.648599                | 4.080094  | 0.193173  |
| 29               | 7                | 0              | 5.280544                | -1.972830 | -0.051338 |
| 30               | 8                | 0              | 5.172264                | -2.946798 | 0.667648  |
| 31               | 8                | 0              | 6.213836                | -1.787795 | -0.807574 |
| 32               | 7                | 0              | -6.165998               | -0.922872 | -0.101492 |
| 33               | 8                | 0              | -7.002923               | -0.040030 | -0.053913 |
| 34               | 8                | 0              | -6.437725               | -2.107209 | -0.176639 |

### Structure 38c (C<sub>2</sub>H<sub>5</sub>OH)

Energy (Hartrees): -1118.28891711  
No imaginary frequencies

Standard orientation:

| Center<br>Number | Atomic<br>Number | Atomic<br>Type | Coordinates (Angstroms) |           |           |
|------------------|------------------|----------------|-------------------------|-----------|-----------|
|                  |                  |                | X                       | Y         | Z         |
| 1                | 6                | 0              | 3.237854                | 1.034354  | -0.877124 |
| 2                | 6                | 0              | 4.243543                | 0.083139  | -0.925994 |
| 3                | 6                | 0              | 4.211424                | -0.956597 | -0.005789 |
| 4                | 6                | 0              | 3.219343                | -1.075470 | 0.956711  |
| 5                | 6                | 0              | 2.224122                | -0.109877 | 0.995411  |
| 6                | 6                | 0              | 2.217506                | 0.948742  | 0.078785  |
| 7                | 1                | 0              | 3.237616                | 1.848487  | -1.591839 |
| 8                | 1                | 0              | 5.031564                | 0.140183  | -1.665283 |
| 9                | 1                | 0              | 3.234487                | -1.892464 | 1.666062  |
| 10               | 1                | 0              | 1.456768                | -0.168690 | 1.760054  |
| 11               | 6                | 0              | 1.161912                | 1.983566  | 0.119494  |
| 12               | 6                | 0              | -0.175412               | 1.717212  | 0.101162  |
| 13               | 6                | 0              | 1.517010                | 3.390046  | 0.163266  |
| 14               | 1                | 0              | -0.864226               | 2.553647  | 0.137582  |



|    |   |   |           |           |           |
|----|---|---|-----------|-----------|-----------|
| 15 | 7 | 0 | -0.733255 | 0.491161  | 0.008032  |
| 16 | 1 | 0 | -0.110550 | -0.306154 | -0.081893 |
| 17 | 6 | 0 | -2.093131 | 0.191348  | -0.012539 |
| 18 | 6 | 0 | -2.451601 | -1.156973 | -0.162155 |
| 19 | 6 | 0 | -3.090172 | 1.168559  | 0.114753  |
| 20 | 6 | 0 | -3.779978 | -1.529257 | -0.188642 |
| 21 | 1 | 0 | -1.675932 | -1.908512 | -0.260225 |
| 22 | 6 | 0 | -4.422238 | 0.799101  | 0.083112  |
| 23 | 1 | 0 | -2.847753 | 2.214600  | 0.241738  |
| 24 | 6 | 0 | -4.752954 | -0.542134 | -0.067879 |
| 25 | 1 | 0 | -4.059551 | -2.567866 | -0.305216 |
| 26 | 1 | 0 | -5.197834 | 1.547353  | 0.180927  |
| 27 | 8 | 0 | 2.657077  | 3.829397  | 0.178721  |
| 28 | 1 | 0 | 0.659667  | 4.084571  | 0.195245  |
| 29 | 7 | 0 | 5.273484  | -1.967339 | -0.048202 |
| 30 | 8 | 0 | 5.176610  | -2.936325 | 0.679698  |
| 31 | 8 | 0 | 6.204183  | -1.790662 | -0.809903 |
| 32 | 7 | 0 | -6.156941 | -0.924619 | -0.103324 |
| 33 | 8 | 0 | -6.998962 | -0.045645 | -0.055195 |
| 34 | 8 | 0 | -6.432737 | -2.108532 | -0.181837 |

### Structure 38d (vacuum)

Energy (Hartrees): -1118.24499763  
No imaginary frequencies

Standard orientation:

| Center<br>Number | Atomic<br>Number | Atomic<br>Type | Coordinates (Angstroms) |           |           |
|------------------|------------------|----------------|-------------------------|-----------|-----------|
|                  |                  |                | X                       | Y         | Z         |
| 1                | 6                | 0              | -3.443413               | 1.147323  | 0.645422  |
| 2                | 6                | 0              | -4.595014               | 0.382630  | 0.750071  |
| 3                | 6                | 0              | -4.650638               | -0.832854 | 0.085158  |
| 4                | 6                | 0              | -3.602144               | -1.302988 | -0.688613 |
| 5                | 6                | 0              | -2.459476               | -0.523863 | -0.788557 |
| 6                | 6                | 0              | -2.355510               | 0.698268  | -0.113469 |
| 7                | 1                | 0              | -3.386054               | 2.098775  | 1.155778  |
| 8                | 1                | 0              | -5.441944               | 0.709549  | 1.338061  |
| 9                | 1                | 0              | -3.697134               | -2.247643 | -1.206544 |
| 10               | 1                | 0              | -1.646756               | -0.856702 | -1.424150 |
| 11               | 6                | 0              | -1.108470               | 1.494044  | -0.197385 |
| 12               | 6                | 0              | 0.088671                | 0.858546  | -0.095479 |
| 13               | 6                | 0              | -1.186686               | 2.948020  | -0.393353 |
| 14               | 1                | 0              | 0.085066                | -0.213117 | 0.067669  |
| 15               | 7                | 0              | 1.336485                | 1.411168  | -0.122773 |
| 16               | 1                | 0              | 1.418117                | 2.416292  | -0.128532 |
| 17               | 6                | 0              | 2.543386                | 0.712879  | -0.058695 |
| 18               | 6                | 0              | 3.705378                | 1.436217  | 0.242724  |
| 19               | 6                | 0              | 2.629487                | -0.662651 | -0.302600 |
| 20               | 6                | 0              | 4.930628                | 0.801451  | 0.312347  |
| 21               | 1                | 0              | 3.640077                | 2.501691  | 0.432541  |
| 22               | 6                | 0              | 3.854686                | -1.304107 | -0.220358 |
| 23               | 1                | 0              | 1.756971                | -1.237554 | -0.581101 |
| 24               | 6                | 0              | 4.987480                | -0.566861 | 0.086549  |
| 25               | 1                | 0              | 5.835702                | 1.345313  | 0.546796  |
| 26               | 1                | 0              | 3.943826                | -2.366084 | -0.406342 |
| 27               | 1                | 0              | -0.219208               | 3.472921  | -0.527441 |
| 28               | 8                | 0              | -2.206822               | 3.590092  | -0.435384 |
| 29               | 7                | 0              | -5.874365               | -1.652170 | 0.196420  |
| 30               | 8                | 0              | -5.899043               | -2.705105 | -0.403888 |
| 31               | 8                | 0              | -6.775933               | -1.222117 | 0.882034  |
| 32               | 7                | 0              | 6.286915                | -1.251810 | 0.165364  |
| 33               | 8                | 0              | 7.258425                | -0.577771 | 0.432161  |
| 34               | 8                | 0              | 6.303109                | -2.446362 | -0.040221 |

### Structure 38d (CHCl<sub>3</sub>)

Energy (Hartrees): -1118.27933926  
No imaginary frequencies

Standard orientation:

| Center<br>Number | Atomic<br>Number | Atomic<br>Type | Coordinates (Angstroms) |           |           |
|------------------|------------------|----------------|-------------------------|-----------|-----------|
|                  |                  |                | X                       | Y         | Z         |
| 1                | 6                | 0              | -3.442292               | 1.135577  | 0.670695  |
| 2                | 6                | 0              | -4.594039               | 0.370393  | 0.760971  |
| 3                | 6                | 0              | -4.650646               | -0.831327 | 0.068332  |
| 4                | 6                | 0              | -3.601042               | -1.284551 | -0.717067 |
| 5                | 6                | 0              | -2.459395               | -0.503056 | -0.802739 |
| 6                | 6                | 0              | -2.354442               | 0.706118  | -0.102512 |
| 7                | 1                | 0              | -3.382765               | 2.068754  | 1.214387  |
| 8                | 1                | 0              | -5.433818               | 0.690805  | 1.363080  |
| 9                | 1                | 0              | -3.685147               | -2.217869 | -1.257449 |
| 10               | 1                | 0              | -1.644258               | -0.827495 | -1.439497 |
| 11               | 6                | 0              | -1.108235               | 1.504547  | -0.166937 |
| 12               | 6                | 0              | 0.090174                | 0.856173  | -0.087126 |
| 13               | 6                | 0              | -1.185105               | 2.953702  | -0.342914 |
| 14               | 1                | 0              | 0.075211                | -0.220985 | 0.030955  |
| 15               | 7                | 0              | 1.333623                | 1.399584  | -0.093095 |
| 16               | 1                | 0              | 1.429557                | 2.406692  | -0.077025 |
| 17               | 6                | 0              | 2.537487                | 0.698635  | -0.040912 |
| 18               | 6                | 0              | 3.708661                | 1.441819  | 0.168433  |
| 19               | 6                | 0              | 2.616671                | -0.690553 | -0.204204 |
| 20               | 6                | 0              | 4.937053                | 0.814316  | 0.227500  |
| 21               | 1                | 0              | 3.645284                | 2.517838  | 0.287337  |
| 22               | 6                | 0              | 3.845671                | -1.323293 | -0.136475 |
| 23               | 1                | 0              | 1.736680                | -1.286585 | -0.402355 |
| 24               | 6                | 0              | 4.989227                | -0.567148 | 0.080972  |
| 25               | 1                | 0              | 5.843310                | 1.381631  | 0.392899  |
| 26               | 1                | 0              | 3.919225                | -2.395478 | -0.261998 |
| 27               | 1                | 0              | -0.222953               | 3.486528  | -0.444713 |
| 28               | 8                | 0              | -2.214932               | 3.592738  | -0.413007 |
| 29               | 7                | 0              | -5.867933               | -1.648995 | 0.164905  |
| 30               | 8                | 0              | -5.889204               | -2.711200 | -0.424490 |
| 31               | 8                | 0              | -6.790683               | -1.222479 | 0.829360  |
| 32               | 7                | 0              | 6.284510                | -1.243057 | 0.150240  |
| 33               | 8                | 0              | 7.280012                | -0.558654 | 0.285729  |
| 34               | 8                | 0              | 6.301030                | -2.455989 | 0.070400  |

### Structure 38d (DMSO)

Energy (Hartrees): -1118.28295575  
No imaginary frequencies

Standard orientation:

| Center<br>Number | Atomic<br>Number | Atomic<br>Type | Coordinates (Angstroms) |           |           |
|------------------|------------------|----------------|-------------------------|-----------|-----------|
|                  |                  |                | X                       | Y         | Z         |
| 1                | 6                | 0              | -3.442661               | 1.138263  | 0.667118  |
| 2                | 6                | 0              | -4.600167               | 0.382336  | 0.754948  |
| 3                | 6                | 0              | -4.657257               | -0.827822 | 0.075372  |
| 4                | 6                | 0              | -3.598078               | -1.299418 | -0.687042 |
| 5                | 6                | 0              | -2.450085               | -0.526917 | -0.769784 |
| 6                | 6                | 0              | -2.348161               | 0.694252  | -0.089469 |
| 7                | 1                | 0              | -3.381954               | 2.075625  | 1.203747  |
| 8                | 1                | 0              | -5.441616               | 0.718058  | 1.346403  |
| 9                | 1                | 0              | -3.675788               | -2.240525 | -1.214796 |
| 10               | 1                | 0              | -1.627219               | -0.870497 | -1.386272 |
| 11               | 6                | 0              | -1.104557               | 1.494190  | -0.156454 |
| 12               | 6                | 0              | 0.095425                | 0.846194  | -0.065059 |
| 13               | 6                | 0              | -1.185620               | 2.937821  | -0.360278 |
| 14               | 1                | 0              | 0.080819                | -0.230778 | 0.057785  |
| 15               | 7                | 0              | 1.334306                | 1.392175  | -0.070698 |

|    |   |   |           |           |           |
|----|---|---|-----------|-----------|-----------|
| 16 | 1 | 0 | 1.431333  | 2.400731  | -0.065110 |
| 17 | 6 | 0 | 2.537976  | 0.693269  | -0.022471 |
| 18 | 6 | 0 | 3.706475  | 1.440176  | 0.191906  |
| 19 | 6 | 0 | 2.621416  | -0.694943 | -0.197473 |
| 20 | 6 | 0 | 4.936989  | 0.817213  | 0.243159  |
| 21 | 1 | 0 | 3.636219  | 2.514459  | 0.321066  |
| 22 | 6 | 0 | 3.853140  | -1.322511 | -0.138595 |
| 23 | 1 | 0 | 1.743099  | -1.292938 | -0.398338 |
| 24 | 6 | 0 | 4.995226  | -0.563181 | 0.081954  |
| 25 | 1 | 0 | 5.839545  | 1.389426  | 0.411324  |
| 26 | 1 | 0 | 3.926525  | -2.393201 | -0.276244 |
| 27 | 1 | 0 | -0.226924 | 3.479013  | -0.428126 |
| 28 | 8 | 0 | -2.220210 | 3.564156  | -0.492364 |
| 29 | 7 | 0 | -5.882184 | -1.631746 | 0.161419  |
| 30 | 8 | 0 | -5.907469 | -2.700909 | -0.417607 |
| 31 | 8 | 0 | -6.813434 | -1.189543 | 0.806402  |
| 32 | 7 | 0 | 6.292597  | -1.231004 | 0.135537  |
| 33 | 8 | 0 | 7.284909  | -0.545558 | 0.301222  |
| 34 | 8 | 0 | 6.321527  | -2.441757 | 0.012067  |

### Structure 38d (C<sub>2</sub>H<sub>5</sub>OH)

Energy (Hartrees): -1118.28200648

No imaginary frequencies

Standard orientation:

| Center<br>Number | Atomic<br>Number | Atomic<br>Type | Coordinates (Angstroms) |           |           |
|------------------|------------------|----------------|-------------------------|-----------|-----------|
|                  |                  |                | X                       | Y         | Z         |
| 1                | 6                | 0              | -3.444533               | 1.136843  | 0.679728  |
| 2                | 6                | 0              | -4.596128               | 0.371271  | 0.760525  |
| 3                | 6                | 0              | -4.643252               | -0.831223 | 0.066447  |
| 4                | 6                | 0              | -3.582452               | -1.286921 | -0.703872 |
| 5                | 6                | 0              | -2.440685               | -0.505426 | -0.777511 |
| 6                | 6                | 0              | -2.347953               | 0.708026  | -0.082428 |
| 7                | 1                | 0              | -3.389605               | 2.068323  | 1.228088  |
| 8                | 1                | 0              | -5.439664               | 0.694009  | 1.356420  |
| 9                | 1                | 0              | -3.652921               | -2.222894 | -1.241871 |
| 10               | 1                | 0              | -1.615122               | -0.835670 | -1.397755 |
| 11               | 6                | 0              | -1.107080               | 1.513778  | -0.142833 |
| 12               | 6                | 0              | 0.095305                | 0.867472  | -0.045591 |
| 13               | 6                | 0              | -1.189445               | 2.950348  | -0.350579 |
| 14               | 1                | 0              | 0.077766                | -0.208222 | 0.086017  |
| 15               | 7                | 0              | 1.334005                | 1.408703  | -0.056313 |
| 16               | 1                | 0              | 1.436663                | 2.416968  | -0.066472 |
| 17               | 6                | 0              | 2.535064                | 0.702649  | -0.012434 |
| 18               | 6                | 0              | 3.710300                | 1.445651  | 0.175341  |
| 19               | 6                | 0              | 2.606265                | -0.688329 | -0.168986 |
| 20               | 6                | 0              | 4.937478                | 0.815968  | 0.219544  |
| 21               | 1                | 0              | 3.648789                | 2.522254  | 0.288875  |
| 22               | 6                | 0              | 3.833394                | -1.323521 | -0.115151 |
| 23               | 1                | 0              | 1.722585                | -1.283926 | -0.352147 |
| 24               | 6                | 0              | 4.982854                | -0.567648 | 0.079530  |
| 25               | 1                | 0              | 5.845933                | 1.385082  | 0.366464  |
| 26               | 1                | 0              | 3.897267                | -2.396617 | -0.237947 |
| 27               | 1                | 0              | -0.236438               | 3.499188  | -0.413052 |
| 28               | 8                | 0              | -2.229936               | 3.574592  | -0.491145 |
| 29               | 7                | 0              | -5.856237               | -1.647085 | 0.148935  |
| 30               | 8                | 0              | -5.897724               | -2.684900 | -0.484659 |
| 31               | 8                | 0              | -6.770889               | -1.254144 | 0.848010  |
| 32               | 7                | 0              | 6.271517                | -1.243526 | 0.128108  |
| 33               | 8                | 0              | 7.277098                | -0.566434 | 0.246260  |
| 34               | 8                | 0              | 6.292072                | -2.458960 | 0.050021  |

## Structure 38g (vacuum)

Energy (Hartrees): -1118.25025153  
No imaginary frequencies

Standard orientation:

| Center<br>Number | Atomic<br>Number | Atomic<br>Type | Coordinates (Angstroms) |           |           |
|------------------|------------------|----------------|-------------------------|-----------|-----------|
|                  |                  |                | X                       | Y         | Z         |
| 1                | 6                | 0              | -2.531124               | -0.417180 | -0.832209 |
| 2                | 6                | 0              | -3.708259               | -1.148672 | -0.863591 |
| 3                | 6                | 0              | -4.760210               | -0.742997 | -0.056892 |
| 4                | 6                | 0              | -4.668062               | 0.357669  | 0.780935  |
| 5                | 6                | 0              | -3.478388               | 1.069226  | 0.811335  |
| 6                | 6                | 0              | -2.397317               | 0.701703  | 0.000002  |
| 7                | 1                | 0              | -1.715370               | -0.702475 | -1.486431 |
| 8                | 1                | 0              | -3.826429               | -2.009017 | -1.508285 |
| 9                | 1                | 0              | -5.510075               | 0.629260  | 1.403355  |
| 10               | 1                | 0              | -3.377563               | 1.905692  | 1.492833  |
| 11               | 6                | 0              | -1.138583               | 1.475402  | 0.010883  |
| 12               | 6                | 0              | -1.163332               | 2.840926  | 0.035700  |
| 13               | 6                | 0              | 0.130517                | 0.784725  | -0.027153 |
| 14               | 1                | 0              | -2.103177               | 3.386362  | 0.044886  |
| 15               | 1                | 0              | 0.110345                | -0.310229 | -0.004599 |
| 16               | 8                | 0              | -0.105760               | 3.616061  | 0.025168  |
| 17               | 1                | 0              | 0.698463                | 3.027251  | -0.018279 |
| 18               | 7                | 0              | 1.252409                | 1.416463  | -0.076236 |
| 19               | 6                | 0              | 2.457656                | 0.695968  | -0.017319 |
| 20               | 6                | 0              | 2.636788                | -0.374143 | 0.866795  |
| 21               | 6                | 0              | 3.512868                | 1.101521  | -0.841142 |
| 22               | 6                | 0              | 3.844201                | -1.054420 | 0.904508  |
| 23               | 1                | 0              | 1.840401                | -0.649965 | 1.547308  |
| 24               | 6                | 0              | 4.719131                | 0.422727  | -0.816416 |
| 25               | 1                | 0              | 3.364927                | 1.943052  | -1.506275 |
| 26               | 6                | 0              | 4.862098                | -0.647660 | 0.056265  |
| 27               | 1                | 0              | 4.010128                | -1.878977 | 1.584476  |
| 28               | 1                | 0              | 5.545516                | 0.707537  | -1.453460 |
| 29               | 7                | 0              | -6.019788               | -1.511769 | -0.087460 |
| 30               | 8                | 0              | -6.922834               | -1.134865 | 0.627313  |
| 31               | 8                | 0              | -6.071440               | -2.471158 | -0.825960 |
| 32               | 7                | 0              | 6.148828                | -1.368075 | 0.093604  |
| 33               | 8                | 0              | 7.018497                | -0.999891 | -0.665835 |
| 34               | 8                | 0              | 6.254635                | -2.284347 | 0.879927  |

## Structure 38g (CHCl<sub>3</sub>)

Energy (Hartrees): -1118.27723458  
No imaginary frequencies

Standard orientation:

| Center<br>Number | Atomic<br>Number | Atomic<br>Type | Coordinates (Angstroms) |           |           |
|------------------|------------------|----------------|-------------------------|-----------|-----------|
|                  |                  |                | X                       | Y         | Z         |
| 1                | 6                | 0              | -2.520969               | -0.450988 | -0.793030 |
| 2                | 6                | 0              | -3.700130               | -1.177942 | -0.824238 |
| 3                | 6                | 0              | -4.769599               | -0.737770 | -0.057232 |
| 4                | 6                | 0              | -4.691865               | 0.395071  | 0.741194  |
| 5                | 6                | 0              | -3.500259               | 1.101710  | 0.772768  |
| 6                | 6                | 0              | -2.401530               | 0.698926  | 0.000429  |
| 7                | 1                | 0              | -1.692018               | -0.769305 | -1.414742 |
| 8                | 1                | 0              | -3.796642               | -2.061538 | -1.440843 |
| 9                | 1                | 0              | -5.541050               | 0.700626  | 1.337972  |
| 10               | 1                | 0              | -3.415456               | 1.963963  | 1.423679  |
| 11               | 6                | 0              | -1.138930               | 1.465576  | 0.012933  |
| 12               | 6                | 0              | -1.156299               | 2.831820  | 0.041603  |
| 13               | 6                | 0              | 0.125451                | 0.766055  | -0.023325 |
| 14               | 1                | 0              | -2.089022               | 3.389334  | 0.054807  |
| 15               | 1                | 0              | 0.103357                | -0.327412 | 0.000998  |
| 16               | 8                | 0              | -0.085958               | 3.593720  | 0.029963  |
| 17               | 1                | 0              | 0.712831                | 2.989957  | -0.018709 |
| 18               | 7                | 0              | 1.248318                | 1.398477  | -0.075448 |

|    |   |   |           |           |           |
|----|---|---|-----------|-----------|-----------|
| 19 | 6 | 0 | 2.455476  | 0.684372  | -0.016991 |
| 20 | 6 | 0 | 2.632651  | -0.403079 | 0.847550  |
| 21 | 6 | 0 | 3.515924  | 1.115613  | -0.822657 |
| 22 | 6 | 0 | 3.844970  | -1.072544 | 0.884886  |
| 23 | 1 | 0 | 1.829964  | -0.705983 | 1.509034  |
| 24 | 6 | 0 | 4.727164  | 0.446807  | -0.800083 |
| 25 | 1 | 0 | 3.370274  | 1.969927  | -1.472625 |
| 26 | 6 | 0 | 4.869583  | -0.639889 | 0.054547  |
| 27 | 1 | 0 | 4.000609  | -1.909524 | 1.552371  |
| 28 | 1 | 0 | 5.551910  | 0.758000  | -1.427226 |
| 29 | 7 | 0 | -6.025015 | -1.499837 | -0.087576 |
| 30 | 8 | 0 | -6.967586 | -1.072451 | 0.548248  |
| 31 | 8 | 0 | -6.056811 | -2.518842 | -0.747814 |
| 32 | 7 | 0 | 6.154614  | -1.349020 | 0.090165  |
| 33 | 8 | 0 | 7.021450  | -0.998404 | -0.685180 |
| 34 | 8 | 0 | 6.285153  | -2.252501 | 0.891679  |

### Structure 38g (DMSO)

Energy (Hartrees): -1118.27690819

No imaginary frequencies

Standard orientation:

| Center Number | Atomic Number | Atomic Type | Coordinates (Angstroms) |           |           |
|---------------|---------------|-------------|-------------------------|-----------|-----------|
|               |               |             | X                       | Y         | Z         |
| 1             | 6             | 0           | -2.508539               | -0.481262 | -0.749469 |
| 2             | 6             | 0           | -3.688989               | -1.205554 | -0.781104 |
| 3             | 6             | 0           | -4.775746               | -0.734427 | -0.057208 |
| 4             | 6             | 0           | -4.712362               | 0.428900  | 0.698661  |
| 5             | 6             | 0           | -3.519949               | 1.133531  | 0.731746  |
| 6             | 6             | 0           | -2.403849               | 0.698290  | 0.002153  |
| 7             | 1             | 0           | -1.667509               | -0.828311 | -1.338382 |
| 8             | 1             | 0           | -3.768943               | -2.111980 | -1.366082 |
| 9             | 1             | 0           | -5.572056               | 0.763635  | 1.264115  |
| 10            | 1             | 0           | -3.452558               | 2.022197  | 1.348220  |
| 11            | 6             | 0           | -1.138909               | 1.459291  | 0.016923  |
| 12            | 6             | 0           | -1.149168               | 2.827082  | 0.033456  |
| 13            | 6             | 0           | 0.122635                | 0.755736  | -0.012103 |
| 14            | 1             | 0           | -2.078098               | 3.391094  | 0.035791  |
| 15            | 1             | 0           | 0.099918                | -0.336927 | 0.008506  |
| 16            | 8             | 0           | -0.071065               | 3.577214  | 0.021546  |
| 17            | 1             | 0           | 0.719632                | 2.955214  | -0.016880 |
| 18            | 7             | 0           | 1.246128                | 1.390483  | -0.056661 |
| 19            | 6             | 0           | 2.454437                | 0.679129  | -0.002994 |
| 20            | 6             | 0           | 2.625771                | -0.436468 | 0.826800  |
| 21            | 6             | 0           | 3.522849                | 1.142504  | -0.780081 |
| 22            | 6             | 0           | 3.840421                | -1.101400 | 0.855523  |
| 23            | 1             | 0           | 1.816161                | -0.768672 | 1.465611  |
| 24            | 6             | 0           | 4.736724                | 0.478528  | -0.766035 |
| 25            | 1             | 0           | 3.382405                | 2.018707  | -1.401776 |
| 26            | 6             | 0           | 4.873814                | -0.636618 | 0.052719  |
| 27            | 1             | 0           | 3.987177                | -1.961636 | 1.494976  |
| 28            | 1             | 0           | 5.564883                | 0.818000  | -1.373895 |
| 29            | 7             | 0           | -6.030875               | -1.493069 | -0.089407 |
| 30            | 8             | 0           | -6.984073               | -1.050919 | 0.522671  |
| 31            | 8             | 0           | -6.057834               | -2.527470 | -0.728345 |
| 32            | 7             | 0           | 6.159428                | -1.341721 | 0.078702  |
| 33            | 8             | 0           | 7.030857                | -0.972136 | -0.684635 |
| 34            | 8             | 0           | 6.291037                | -2.263532 | 0.860941  |

### Structure 38g (C<sub>2</sub>H<sub>5</sub>OH)

Energy (Hartrees): -1118.27527689

No imaginary frequencies

Standard orientation:

| Center Number | Atomic Number | Atomic Type | Coordinates (Angstroms) |   |   |
|---------------|---------------|-------------|-------------------------|---|---|
|               |               |             | X                       | Y | Z |

|    |   |   |           |           |           |
|----|---|---|-----------|-----------|-----------|
| 1  | 6 | 0 | -2.504910 | -0.458900 | -0.775464 |
| 2  | 6 | 0 | -3.679783 | -1.191519 | -0.806553 |
| 3  | 6 | 0 | -4.759293 | -0.742861 | -0.057173 |
| 4  | 6 | 0 | -4.695199 | 0.404674  | 0.723005  |
| 5  | 6 | 0 | -3.508060 | 1.117277  | 0.753970  |
| 6  | 6 | 0 | -2.399295 | 0.705616  | -0.000530 |
| 7  | 1 | 0 | -1.669130 | -0.786820 | -1.382720 |
| 8  | 1 | 0 | -3.761373 | -2.085718 | -1.410138 |
| 9  | 1 | 0 | -5.549011 | 0.719756  | 1.308399  |
| 10 | 1 | 0 | -3.437199 | 1.992285  | 1.389327  |
| 11 | 6 | 0 | -1.139394 | 1.475302  | 0.012719  |
| 12 | 6 | 0 | -1.163300 | 2.840018  | 0.053193  |
| 13 | 6 | 0 | 0.125426  | 0.775093  | -0.032851 |
| 14 | 1 | 0 | -2.095967 | 3.396664  | 0.074916  |
| 15 | 1 | 0 | 0.101420  | -0.317850 | -0.012547 |
| 16 | 8 | 0 | -0.092266 | 3.607835  | 0.044326  |
| 17 | 1 | 0 | 0.711055  | 3.012776  | -0.014798 |
| 18 | 7 | 0 | 1.248419  | 1.407249  | -0.086060 |
| 19 | 6 | 0 | 2.451274  | 0.687356  | -0.028556 |
| 20 | 6 | 0 | 2.621950  | -0.400350 | 0.837995  |
| 21 | 6 | 0 | 3.515497  | 1.114605  | -0.832141 |
| 22 | 6 | 0 | 3.831559  | -1.072840 | 0.881301  |
| 23 | 1 | 0 | 1.815063  | -0.701858 | 1.495300  |
| 24 | 6 | 0 | 4.724011  | 0.442352  | -0.805379 |
| 25 | 1 | 0 | 3.376917  | 1.968578  | -1.484245 |
| 26 | 6 | 0 | 4.860633  | -0.643025 | 0.053321  |
| 27 | 1 | 0 | 3.977712  | -1.909742 | 1.551246  |
| 28 | 1 | 0 | 5.549313  | 0.753965  | -1.431788 |
| 29 | 7 | 0 | -6.005360 | -1.508639 | -0.086865 |
| 30 | 8 | 0 | -6.957887 | -1.088632 | 0.542884  |
| 31 | 8 | 0 | -6.037078 | -2.533529 | -0.741851 |
| 32 | 7 | 0 | 6.139546  | -1.350162 | 0.096894  |
| 33 | 8 | 0 | 7.011669  | -1.017266 | -0.683603 |
| 34 | 8 | 0 | 6.277596  | -2.243151 | 0.911759  |

### Structure 39a (vacuum)

Energy (Hartrees): -1034.92201435

No imaginary frequencies

Standard orientation:

| Center<br>Number | Atomic<br>Number | Atomic<br>Type | Coordinates (Angstroms) |           |           |
|------------------|------------------|----------------|-------------------------|-----------|-----------|
|                  |                  |                | X                       | Y         | Z         |
| 1                | 6                | 0              | -2.681045               | -0.955719 | -0.986688 |
| 2                | 6                | 0              | -4.061598               | -1.023478 | -1.015699 |
| 3                | 6                | 0              | -4.823753               | -0.204234 | -0.178492 |
| 4                | 6                | 0              | -4.181818               | 0.672701  | 0.691461  |
| 5                | 6                | 0              | -2.788440               | 0.716107  | 0.719354  |
| 6                | 6                | 0              | -2.010212               | -0.079970 | -0.119250 |
| 7                | 1                | 0              | -2.107386               | -1.576882 | -1.666498 |
| 8                | 1                | 0              | -4.579547               | -1.694535 | -1.690020 |
| 9                | 1                | 0              | -4.743850               | 1.307292  | 1.363316  |
| 10               | 1                | 0              | -2.301262               | 1.372204  | 1.432831  |
| 11               | 6                | 0              | -0.529508               | -0.007967 | -0.099933 |
| 12               | 6                | 0              | 0.084786                | 1.213474  | -0.056159 |
| 13               | 6                | 0              | 0.221412                | -1.243270 | -0.099592 |
| 14               | 1                | 0              | -0.531221               | 2.105922  | -0.064357 |
| 15               | 1                | 0              | -0.373239               | -2.164539 | -0.100963 |
| 16               | 1                | 0              | 1.976846                | 0.559328  | 0.049015  |
| 17               | 7                | 0              | 1.507819                | -1.305780 | -0.086143 |
| 18               | 7                | 0              | 1.418296                | 1.413895  | 0.007274  |
| 19               | 8                | 0              | -6.172797               | -0.337387 | -0.282941 |
| 20               | 6                | 0              | -6.976064               | 0.476009  | 0.544443  |
| 21               | 1                | 0              | -8.007392               | 0.226864  | 0.304511  |
| 22               | 1                | 0              | -6.789157               | 0.270265  | 1.603330  |
| 23               | 1                | 0              | -6.802121               | 1.538108  | 0.343876  |
| 24               | 6                | 0              | 2.119595                | -2.570563 | 0.008751  |
| 25               | 6                | 0              | 3.277211                | -2.806961 | -0.738867 |
| 26               | 6                | 0              | 1.639973                | -3.575099 | 0.856514  |
| 27               | 6                | 0              | 3.915569                | -4.037543 | -0.672566 |

|    |   |   |          |           |           |
|----|---|---|----------|-----------|-----------|
| 28 | 1 | 0 | 3.651078 | -2.016490 | -1.379054 |
| 29 | 6 | 0 | 2.288867 | -4.802571 | 0.924362  |
| 30 | 1 | 0 | 0.778135 | -3.377682 | 1.483853  |
| 31 | 6 | 0 | 3.423754 | -5.042457 | 0.157278  |
| 32 | 1 | 0 | 4.804389 | -4.213539 | -1.267313 |
| 33 | 1 | 0 | 1.911670 | -5.569832 | 1.590589  |
| 34 | 1 | 0 | 3.929043 | -5.998856 | 0.215050  |
| 35 | 6 | 0 | 2.066104 | 2.654633  | 0.006062  |
| 36 | 6 | 0 | 3.404667 | 2.699365  | 0.410774  |
| 37 | 6 | 0 | 1.434886 | 3.836051  | -0.392929 |
| 38 | 6 | 0 | 4.091397 | 3.903815  | 0.428415  |
| 39 | 1 | 0 | 3.894573 | 1.782623  | 0.720430  |
| 40 | 6 | 0 | 2.130525 | 5.038786  | -0.358415 |
| 41 | 1 | 0 | 0.414762 | 3.823925  | -0.754263 |
| 42 | 6 | 0 | 3.457936 | 5.084949  | 0.051759  |
| 43 | 1 | 0 | 5.127139 | 3.919634  | 0.746885  |
| 44 | 1 | 0 | 1.627663 | 5.946788  | -0.670110 |
| 45 | 1 | 0 | 3.993974 | 6.025336  | 0.071016  |

### Structure 39a (CHCl<sub>3</sub>)

Energy (Hartrees): -1034.95328501

No imaginary frequencies

Standard orientation:

| Center<br>Number | Atomic<br>Number | Atomic<br>Type | Coordinates (Angstroms) |           |           |
|------------------|------------------|----------------|-------------------------|-----------|-----------|
|                  |                  |                | X                       | Y         | Z         |
| 1                | 6                | 0              | -2.671652               | -1.023289 | -0.940245 |
| 2                | 6                | 0              | -4.052790               | -1.101230 | -0.981241 |
| 3                | 6                | 0              | -4.829788               | -0.257141 | -0.182136 |
| 4                | 6                | 0              | -4.201734               | 0.652836  | 0.665501  |
| 5                | 6                | 0              | -2.808740               | 0.707196  | 0.706111  |
| 6                | 6                | 0              | -2.014880               | -0.112056 | -0.097960 |
| 7                | 1                | 0              | -2.089718               | -1.666244 | -1.592462 |
| 8                | 1                | 0              | -4.553712               | -1.801178 | -1.640260 |
| 9                | 1                | 0              | -4.775881               | 1.307088  | 1.308436  |
| 10               | 1                | 0              | -2.337191               | 1.397223  | 1.398419  |
| 11               | 6                | 0              | -0.533195               | -0.022951 | -0.074101 |
| 12               | 6                | 0              | 0.063209                | 1.210627  | -0.041118 |
| 13               | 6                | 0              | 0.230244                | -1.249585 | -0.074273 |
| 14               | 1                | 0              | -0.567596               | 2.092405  | -0.056243 |
| 15               | 1                | 0              | -0.353493               | -2.176726 | -0.071079 |
| 16               | 1                | 0              | 1.972279                | 0.592385  | 0.051209  |
| 17               | 7                | 0              | 1.519216                | -1.297052 | -0.071686 |
| 18               | 7                | 0              | 1.392548                | 1.432109  | 0.012130  |
| 19               | 8                | 0              | -6.176569               | -0.397115 | -0.298121 |
| 20               | 6                | 0              | -6.997303               | 0.457222  | 0.480523  |
| 21               | 1                | 0              | -8.024660               | 0.201107  | 0.228324  |
| 22               | 1                | 0              | -6.835366               | 0.292243  | 1.550003  |
| 23               | 1                | 0              | -6.815818               | 1.508642  | 0.237671  |
| 24               | 6                | 0              | 2.150219                | -2.553094 | 0.017641  |
| 25               | 6                | 0              | 3.329553                | -2.753538 | -0.708407 |
| 26               | 6                | 0              | 1.672776                | -3.582903 | 0.837809  |
| 27               | 6                | 0              | 3.992661                | -3.972604 | -0.649063 |
| 28               | 1                | 0              | 3.703766                | -1.945357 | -1.327182 |
| 29               | 6                | 0              | 2.345758                | -4.798571 | 0.898075  |
| 30               | 1                | 0              | 0.790747                | -3.417867 | 1.446628  |
| 31               | 6                | 0              | 3.503471                | -5.002260 | 0.152725  |
| 32               | 1                | 0              | 4.899015                | -4.118960 | -1.226024 |
| 33               | 1                | 0              | 1.968973                | -5.585447 | 1.542073  |
| 34               | 1                | 0              | 4.026933                | -5.949725 | 0.205296  |
| 35               | 6                | 0              | 2.029586                | 2.679867  | 0.006855  |
| 36               | 6                | 0              | 3.398355                | 2.713446  | 0.298931  |
| 37               | 6                | 0              | 1.362848                | 3.873872  | -0.285247 |
| 38               | 6                | 0              | 4.082799                | 3.920359  | 0.309752  |
| 39               | 1                | 0              | 3.915189                | 1.785691  | 0.521768  |
| 40               | 6                | 0              | 2.059244                | 5.077395  | -0.262433 |
| 41               | 1                | 0              | 0.312299                | 3.876836  | -0.546165 |
| 42               | 6                | 0              | 3.417855                | 5.113308  | 0.034672  |
| 43               | 1                | 0              | 5.142195                | 3.927419  | 0.540035  |
| 44               | 1                | 0              | 1.528838                | 5.995208  | -0.489962 |
| 45               | 1                | 0              | 3.952425                | 6.055337  | 0.047140  |

## Structure 39a (DMSO)

Energy (Hartrees): -1034.94674770  
No imaginary frequencies

Standard orientation:

| Center<br>Number | Atomic<br>Number | Atomic<br>Type | Coordinates (Angstroms) |           |           |
|------------------|------------------|----------------|-------------------------|-----------|-----------|
|                  |                  |                | X                       | Y         | Z         |
| 1                | 6                | 0              | -2.666806               | -1.080878 | -0.894845 |
| 2                | 6                | 0              | -4.047958               | -1.167637 | -0.940841 |
| 3                | 6                | 0              | -4.835947               | -0.298540 | -0.179352 |
| 4                | 6                | 0              | -4.216486               | 0.645764  | 0.638238  |
| 5                | 6                | 0              | -2.824034               | 0.709283  | 0.684924  |
| 6                | 6                | 0              | -2.019952               | -0.135141 | -0.083042 |
| 7                | 1                | 0              | -2.079566               | -1.746452 | -1.519122 |
| 8                | 1                | 0              | -4.537300               | -1.896341 | -1.577286 |
| 9                | 1                | 0              | -4.796467               | 1.321707  | 1.253104  |
| 10               | 1                | 0              | -2.362238               | 1.430383  | 1.351803  |
| 11               | 6                | 0              | -0.539024               | -0.034371 | -0.055893 |
| 12               | 6                | 0              | 0.046240                | 1.206367  | -0.030800 |
| 13               | 6                | 0              | 0.233876                | -1.254437 | -0.051910 |
| 14               | 1                | 0              | -0.591952               | 2.082882  | -0.050913 |
| 15               | 1                | 0              | -0.340853               | -2.186706 | -0.045965 |
| 16               | 1                | 0              | 1.964454                | 0.607473  | 0.062092  |
| 17               | 7                | 0              | 1.524236                | -1.288086 | -0.052828 |
| 18               | 7                | 0              | 1.373156                | 1.439052  | 0.019198  |
| 19               | 8                | 0              | -6.179963               | -0.446862 | -0.298052 |
| 20               | 6                | 0              | -7.004361               | 0.442741  | 0.440887  |
| 21               | 1                | 0              | -8.031222               | 0.182016  | 0.191664  |
| 22               | 1                | 0              | -6.850345               | 0.321095  | 1.517028  |
| 23               | 1                | 0              | -6.815287               | 1.482571  | 0.158313  |
| 24               | 6                | 0              | 2.172617                | -2.536078 | 0.025617  |
| 25               | 6                | 0              | 3.368149                | -2.698389 | -0.684348 |
| 26               | 6                | 0              | 1.701452                | -3.592807 | 0.815563  |
| 27               | 6                | 0              | 4.055746                | -3.904884 | -0.639236 |
| 28               | 1                | 0              | 3.738178                | -1.869818 | -1.278704 |
| 29               | 6                | 0              | 2.398903                | -4.795923 | 0.861479  |
| 30               | 1                | 0              | 0.804174                | -3.462569 | 1.410592  |
| 31               | 6                | 0              | 3.573356                | -4.961130 | 0.131798  |
| 32               | 1                | 0              | 4.974815                | -4.019327 | -1.203275 |
| 33               | 1                | 0              | 2.027046                | -5.604303 | 1.481442  |
| 34               | 1                | 0              | 4.114962                | -5.899025 | 0.173413  |
| 35               | 6                | 0              | 2.001333                | 2.691870  | 0.008956  |
| 36               | 6                | 0              | 3.374899                | 2.729712  | 0.278402  |
| 37               | 6                | 0              | 1.323011                | 3.883394  | -0.267059 |
| 38               | 6                | 0              | 4.054541                | 3.939829  | 0.282305  |
| 39               | 1                | 0              | 3.898721                | 1.802828  | 0.488861  |
| 40               | 6                | 0              | 2.015584                | 5.089835  | -0.252565 |
| 41               | 1                | 0              | 0.267191                | 3.884013  | -0.505762 |
| 42               | 6                | 0              | 3.379511                | 5.130709  | 0.021365  |
| 43               | 1                | 0              | 5.117672                | 3.950556  | 0.494915  |
| 44               | 1                | 0              | 1.477616                | 6.006369  | -0.467719 |
| 45               | 1                | 0              | 3.910464                | 6.075048  | 0.027483  |



## Structure 39a (C<sub>2</sub>H<sub>5</sub>OH)

Energy (Hartrees): -1034.95020217

No imaginary frequencies

Standard orientation:

| Center<br>Number | Atomic<br>Number | Atomic<br>Type | Coordinates (Angstroms) |           |           |
|------------------|------------------|----------------|-------------------------|-----------|-----------|
|                  |                  |                | X                       | Y         | Z         |
| 1                | 6                | 0              | -2.668237               | -1.035527 | -0.935907 |
| 2                | 6                | 0              | -4.050420               | -1.114843 | -0.967784 |
| 3                | 6                | 0              | -4.822168               | -0.259694 | -0.176353 |
| 4                | 6                | 0              | -4.192129               | 0.663761  | 0.654748  |
| 5                | 6                | 0              | -2.799033               | 0.720172  | 0.685936  |
| 6                | 6                | 0              | -2.008704               | -0.111271 | -0.110283 |
| 7                | 1                | 0              | -2.090035               | -1.689479 | -1.580774 |
| 8                | 1                | 0              | -4.552772               | -1.826051 | -1.614254 |
| 9                | 1                | 0              | -4.763364               | 1.327422  | 1.290829  |
| 10               | 1                | 0              | -2.325161               | 1.423089  | 1.363806  |
| 11               | 6                | 0              | -0.526912               | -0.022175 | -0.092202 |
| 12               | 6                | 0              | 0.067614                | 1.213183  | -0.056239 |
| 13               | 6                | 0              | 0.233207                | -1.249891 | -0.089960 |
| 14               | 1                | 0              | -0.564434               | 2.094253  | -0.067744 |
| 15               | 1                | 0              | -0.352931               | -2.175018 | -0.074299 |
| 16               | 1                | 0              | 1.982829                | 0.602439  | 0.036819  |
| 17               | 7                | 0              | 1.523146                | -1.301239 | -0.096862 |
| 18               | 7                | 0              | 1.396193                | 1.436893  | -0.002082 |
| 19               | 8                | 0              | -6.173547               | -0.401801 | -0.281966 |
| 20               | 6                | 0              | -6.990282               | 0.470982  | 0.488148  |
| 21               | 1                | 0              | -8.019240               | 0.213866  | 0.243509  |
| 22               | 1                | 0              | -6.821669               | 0.321266  | 1.558210  |
| 23               | 1                | 0              | -6.803086               | 1.516070  | 0.225813  |
| 24               | 6                | 0              | 2.146293                | -2.560847 | 0.006373  |
| 25               | 6                | 0              | 3.322672                | -2.779980 | -0.719822 |
| 26               | 6                | 0              | 1.665225                | -3.575113 | 0.844453  |
| 27               | 6                | 0              | 3.979900                | -4.001788 | -0.641781 |
| 28               | 1                | 0              | 3.703375                | -1.985111 | -1.352176 |
| 29               | 6                | 0              | 2.332242                | -4.793406 | 0.923241  |
| 30               | 1                | 0              | 0.785386                | -3.396890 | 1.453112  |
| 31               | 6                | 0              | 3.487169                | -5.015777 | 0.178026  |
| 32               | 1                | 0              | 4.884142                | -4.162075 | -1.218792 |
| 33               | 1                | 0              | 1.952554                | -5.567606 | 1.581147  |
| 34               | 1                | 0              | 4.006333                | -5.964975 | 0.245280  |
| 35               | 6                | 0              | 2.029738                | 2.687610  | 0.003734  |
| 36               | 6                | 0              | 3.399659                | 2.719845  | 0.290832  |
| 37               | 6                | 0              | 1.358651                | 3.882459  | -0.274759 |
| 38               | 6                | 0              | 4.082645                | 3.927998  | 0.309922  |
| 39               | 1                | 0              | 3.918790                | 1.790567  | 0.502603  |
| 40               | 6                | 0              | 2.054068                | 5.086928  | -0.244014 |
| 41               | 1                | 0              | 0.306432                | 3.887368  | -0.529361 |
| 42               | 6                | 0              | 3.414410                | 5.122334  | 0.047612  |
| 43               | 1                | 0              | 5.143204                | 3.934446  | 0.535870  |
| 44               | 1                | 0              | 1.521245                | 6.006195  | -0.460889 |
| 45               | 1                | 0              | 3.947759                | 6.065299  | 0.066102  |

**Structure 39b (vacuum)**

Energy (Hartrees): -1034.91500010  
 No imaginary frequencies

Standard orientation:

| Center<br>Number | Atomic<br>Number | Atomic<br>Type | Coordinates (Angstroms) |           |           |
|------------------|------------------|----------------|-------------------------|-----------|-----------|
|                  |                  |                | X                       | Y         | Z         |
| 1                | 6                | 0              | -0.338080               | 2.439586  | -0.776844 |
| 2                | 6                | 0              | -1.051382               | 3.636839  | -0.746466 |
| 3                | 6                | 0              | -2.085059               | 3.797152  | 0.173773  |
| 4                | 6                | 0              | -2.384480               | 2.760505  | 1.062636  |
| 5                | 6                | 0              | -1.660459               | 1.582977  | 1.025114  |
| 6                | 6                | 0              | -0.624061               | 1.391760  | 0.096801  |
| 7                | 1                | 0              | 0.454158                | 2.318966  | -1.508305 |
| 8                | 1                | 0              | -0.795971               | 4.422193  | -1.444868 |
| 9                | 1                | 0              | -3.178992               | 2.912950  | 1.782879  |
| 10               | 1                | 0              | -1.880915               | 0.798996  | 1.742490  |
| 11               | 6                | 0              | 0.157192                | 0.133231  | 0.057291  |
| 12               | 6                | 0              | -0.422640               | -1.091815 | 0.011207  |
| 13               | 6                | 0              | 1.615442                | 0.216946  | 0.041227  |
| 14               | 1                | 0              | 2.030211                | 1.215457  | 0.233610  |
| 15               | 1                | 0              | 0.222931                | -1.962332 | 0.004997  |
| 16               | 7                | 0              | 2.380800                | -0.780940 | -0.182459 |
| 17               | 7                | 0              | -1.760526               | -1.327602 | -0.084274 |
| 18               | 1                | 0              | -2.356270               | -0.527382 | -0.251921 |
| 19               | 8                | 0              | -2.847691               | 4.914506  | 0.286907  |
| 20               | 6                | 0              | -2.571031               | 5.989713  | -0.585988 |
| 21               | 1                | 0              | -2.709808               | 5.696121  | -1.631155 |
| 22               | 1                | 0              | -3.280885               | 6.773786  | -0.333234 |
| 23               | 1                | 0              | -1.551642               | 6.361692  | -0.443801 |
| 24               | 6                | 0              | -2.386339               | -2.577766 | -0.054176 |
| 25               | 6                | 0              | -3.709199               | -2.671945 | -0.500072 |
| 26               | 6                | 0              | -1.742587               | -3.723452 | 0.421982  |
| 27               | 6                | 0              | -4.370827               | -3.890415 | -0.478600 |
| 28               | 1                | 0              | -4.210241               | -1.784428 | -0.872083 |
| 29               | 6                | 0              | -2.413188               | -4.940706 | 0.424667  |
| 30               | 1                | 0              | -0.733186               | -3.668641 | 0.808174  |
| 31               | 6                | 0              | -3.726135               | -5.036739 | -0.022610 |
| 32               | 1                | 0              | -5.394940               | -3.944381 | -0.828392 |
| 33               | 1                | 0              | -1.901392               | -5.821146 | 0.794940  |
| 34               | 1                | 0              | -4.241587               | -5.988588 | -0.010752 |
| 35               | 6                | 0              | 3.770336                | -0.603876 | -0.067777 |
| 36               | 6                | 0              | 4.359056                | 0.149903  | 0.954361  |
| 37               | 6                | 0              | 4.595122                | -1.251616 | -0.993732 |
| 38               | 6                | 0              | 5.741931                | 0.281211  | 1.021095  |
| 39               | 1                | 0              | 3.731018                | 0.604007  | 1.712426  |
| 40               | 6                | 0              | 5.973555                | -1.107705 | -0.928085 |
| 41               | 1                | 0              | 4.129043                | -1.855066 | -1.763478 |
| 42               | 6                | 0              | 6.554665                | -0.338638 | 0.078191  |
| 43               | 1                | 0              | 6.185649                | 0.861415  | 1.821995  |
| 44               | 1                | 0              | 6.599848                | -1.603920 | -1.660379 |
| 45               | 1                | 0              | 7.631592                | -0.236856 | 0.134770  |

## Structure 39b (CHCl<sub>3</sub>)

Energy (Hartrees): -1034.94811171

No imaginary frequencies

Standard orientation:

| Center<br>Number | Atomic<br>Number | Atomic<br>Type | Coordinates (Angstroms) |           |           |
|------------------|------------------|----------------|-------------------------|-----------|-----------|
|                  |                  |                | X                       | Y         | Z         |
| 1                | 6                | 0              | -0.225459               | 2.466130  | -0.783583 |
| 2                | 6                | 0              | -0.872243               | 3.700510  | -0.743084 |
| 3                | 6                | 0              | -1.916908               | 3.898359  | 0.158608  |
| 4                | 6                | 0              | -2.295335               | 2.859850  | 1.015329  |
| 5                | 6                | 0              | -1.637114               | 1.643469  | 0.967527  |
| 6                | 6                | 0              | -0.590272               | 1.415852  | 0.059390  |
| 7                | 1                | 0              | 0.577879                | 2.320821  | -1.498858 |
| 8                | 1                | 0              | -0.557113               | 4.486228  | -1.416948 |
| 9                | 1                | 0              | -3.096784               | 3.034781  | 1.723867  |
| 10               | 1                | 0              | -1.922827               | 0.860768  | 1.663344  |
| 11               | 6                | 0              | 0.136378                | 0.123493  | 0.019200  |
| 12               | 6                | 0              | -0.485636               | -1.086350 | -0.011382 |
| 13               | 6                | 0              | 1.593758                | 0.154242  | 0.011246  |
| 14               | 1                | 0              | 2.043019                | 1.132239  | 0.225000  |
| 15               | 1                | 0              | 0.133489                | -1.975434 | 0.001160  |
| 16               | 7                | 0              | 2.334229                | -0.864206 | -0.227317 |
| 17               | 7                | 0              | -1.824477               | -1.289481 | -0.093527 |
| 18               | 1                | 0              | -2.412974               | -0.478817 | -0.245564 |
| 19               | 8                | 0              | -2.616064               | 5.055010  | 0.279536  |
| 20               | 6                | 0              | -2.234862               | 6.145673  | -0.543498 |
| 21               | 1                | 0              | -2.365435               | 5.905526  | -1.602813 |
| 22               | 1                | 0              | -2.895210               | 6.968880  | -0.277555 |
| 23               | 1                | 0              | -1.197542               | 6.437447  | -0.354853 |
| 24               | 6                | 0              | -2.484335               | -2.523606 | -0.053442 |
| 25               | 6                | 0              | -3.849148               | -2.550438 | -0.365148 |
| 26               | 6                | 0              | -1.838496               | -3.714125 | 0.295130  |
| 27               | 6                | 0              | -4.550732               | -3.747215 | -0.336877 |
| 28               | 1                | 0              | -4.352038               | -1.626483 | -0.632377 |
| 29               | 6                | 0              | -2.552530               | -4.907336 | 0.309729  |
| 30               | 1                | 0              | -0.790760               | -3.720760 | 0.566669  |
| 31               | 6                | 0              | -3.907432               | -4.937228 | -0.004543 |
| 32               | 1                | 0              | -5.606944               | -3.748167 | -0.581658 |
| 33               | 1                | 0              | -2.037078               | -5.822322 | 0.578963  |
| 34               | 1                | 0              | -4.455187               | -5.871482 | 0.013493  |
| 35               | 6                | 0              | 3.726593                | -0.732609 | -0.078270 |
| 36               | 6                | 0              | 4.314444                | -0.010615 | 0.968954  |
| 37               | 6                | 0              | 4.554259                | -1.397525 | -0.990862 |
| 38               | 6                | 0              | 5.699461                | 0.068891  | 1.074817  |
| 39               | 1                | 0              | 3.684214                | 0.461733  | 1.714662  |
| 40               | 6                | 0              | 5.935764                | -1.306606 | -0.884696 |
| 41               | 1                | 0              | 4.092348                | -1.974397 | -1.784522 |
| 42               | 6                | 0              | 6.516344                | -0.571189 | 0.147631  |
| 43               | 1                | 0              | 6.141958                | 0.623980  | 1.894748  |
| 44               | 1                | 0              | 6.563366                | -1.817612 | -1.606328 |
| 45               | 1                | 0              | 7.594865                | -0.510967 | 0.236120  |

## Structure 39b (DMSO)

Energy (Hartrees): -1034.94246096

No imaginary frequencies

Standard orientation:

| Center<br>Number | Atomic<br>Number | Atomic<br>Type | Coordinates (Angstroms) |           |           |
|------------------|------------------|----------------|-------------------------|-----------|-----------|
|                  |                  |                | X                       | Y         | Z         |
| 1                | 6                | 0              | -0.142917               | 2.475671  | -0.745055 |
| 2                | 6                | 0              | -0.756663               | 3.727201  | -0.706374 |
| 3                | 6                | 0              | -1.821829               | 3.942667  | 0.168039  |
| 4                | 6                | 0              | -2.252081               | 2.902441  | 0.999450  |
| 5                | 6                | 0              | -1.627036               | 1.668581  | 0.953199  |
| 6                | 6                | 0              | -0.559798               | 1.424151  | 0.072876  |
| 7                | 1                | 0              | 0.677433                | 2.320432  | -1.438652 |
| 8                | 1                | 0              | -0.400810               | 4.511885  | -1.361159 |
| 9                | 1                | 0              | -3.071266               | 3.085651  | 1.685397  |
| 10               | 1                | 0              | -1.959378               | 0.885367  | 1.627205  |
| 11               | 6                | 0              | 0.133912                | 0.114021  | 0.033755  |
| 12               | 6                | 0              | -0.517369               | -1.082250 | -0.001883 |
| 13               | 6                | 0              | 1.589844                | 0.112458  | 0.032674  |
| 14               | 1                | 0              | 2.059072                | 1.071470  | 0.282986  |
| 15               | 1                | 0              | 0.075359                | -1.989149 | 0.029193  |
| 16               | 7                | 0              | 2.311530                | -0.911590 | -0.246640 |
| 17               | 7                | 0              | -1.857147               | -1.253264 | -0.107794 |
| 18               | 1                | 0              | -2.427214               | -0.434508 | -0.290591 |
| 19               | 8                | 0              | -2.490162               | 5.115899  | 0.284395  |
| 20               | 6                | 0              | -2.074817               | 6.193106  | -0.543463 |
| 21               | 1                | 0              | -2.190394               | 5.943471  | -1.601949 |
| 22               | 1                | 0              | -2.725015               | 7.030336  | -0.297513 |
| 23               | 1                | 0              | -1.035963               | 6.468109  | -0.341068 |
| 24               | 6                | 0              | -2.543881               | -2.472382 | -0.060797 |
| 25               | 6                | 0              | -3.885693               | -2.485614 | -0.461429 |
| 26               | 6                | 0              | -1.947659               | -3.657257 | 0.383460  |
| 27               | 6                | 0              | -4.613707               | -3.666765 | -0.428554 |
| 28               | 1                | 0              | -4.346621               | -1.563711 | -0.800893 |
| 29               | 6                | 0              | -2.687110               | -4.835629 | 0.400527  |
| 30               | 1                | 0              | -0.921924               | -3.668455 | 0.728882  |
| 31               | 6                | 0              | -4.018949               | -4.853173 | -0.003000 |
| 32               | 1                | 0              | -5.651291               | -3.658830 | -0.742628 |
| 33               | 1                | 0              | -2.212695               | -5.747313 | 0.745892  |
| 34               | 1                | 0              | -4.587146               | -5.775279 | 0.019477  |
| 35               | 6                | 0              | 3.706511                | -0.810042 | -0.090870 |
| 36               | 6                | 0              | 4.307368                | -0.127712 | 0.975913  |
| 37               | 6                | 0              | 4.522793                | -1.464470 | -1.022341 |
| 38               | 6                | 0              | 5.694091                | -0.075761 | 1.082603  |
| 39               | 1                | 0              | 3.687192                | 0.337822  | 1.734197  |
| 40               | 6                | 0              | 5.906336                | -1.401584 | -0.914502 |
| 41               | 1                | 0              | 4.053977                | -2.010300 | -1.833929 |
| 42               | 6                | 0              | 6.499939                | -0.704844 | 0.137384  |
| 43               | 1                | 0              | 6.145741                | 0.450548  | 1.916326  |
| 44               | 1                | 0              | 6.524525                | -1.902673 | -1.651133 |
| 45               | 1                | 0              | 7.579342                | -0.664983 | 0.226171  |

## Structure 39b (C<sub>2</sub>H<sub>5</sub>OH)

Energy (Hartrees): -1034.94601164

No imaginary frequencies

Standard orientation:

| Center<br>Number | Atomic<br>Number | Atomic<br>Type | Coordinates (Angstroms) |           |           |
|------------------|------------------|----------------|-------------------------|-----------|-----------|
|                  |                  |                | X                       | Y         | Z         |
| 1                | 6                | 0              | -0.163333               | 2.476261  | -0.761806 |
| 2                | 6                | 0              | -0.782949               | 3.724519  | -0.712508 |
| 3                | 6                | 0              | -1.835942               | 3.930337  | 0.176842  |
| 4                | 6                | 0              | -2.251077               | 2.889130  | 1.012639  |
| 5                | 6                | 0              | -1.620352               | 1.658442  | 0.955419  |
| 6                | 6                | 0              | -0.564538               | 1.421966  | 0.060116  |
| 7                | 1                | 0              | 0.648013                | 2.325131  | -1.467020 |
| 8                | 1                | 0              | -0.441180               | 4.512500  | -1.370816 |
| 9                | 1                | 0              | -3.061080               | 3.068900  | 1.710745  |
| 10               | 1                | 0              | -1.938613               | 0.871845  | 1.632370  |
| 11               | 6                | 0              | 0.135044                | 0.114723  | 0.012035  |
| 12               | 6                | 0              | -0.512152               | -1.083447 | -0.027546 |
| 13               | 6                | 0              | 1.590749                | 0.118391  | 0.013246  |
| 14               | 1                | 0              | 2.056751                | 1.074825  | 0.279878  |
| 15               | 1                | 0              | 0.083136                | -1.989044 | 0.001705  |
| 16               | 7                | 0              | 2.316551                | -0.899281 | -0.278944 |
| 17               | 7                | 0              | -1.851311               | -1.258997 | -0.139594 |
| 18               | 1                | 0              | -2.423349               | -0.443496 | -0.329915 |
| 19               | 8                | 0              | -2.511771               | 5.104298  | 0.304955  |
| 20               | 6                | 0              | -2.104472               | 6.193748  | -0.513737 |
| 21               | 1                | 0              | -2.232892               | 5.956006  | -1.573299 |
| 22               | 1                | 0              | -2.752396               | 7.026966  | -0.248160 |
| 23               | 1                | 0              | -1.063534               | 6.463675  | -0.315993 |
| 24               | 6                | 0              | -2.534146               | -2.479976 | -0.073142 |
| 25               | 6                | 0              | -3.866079               | -2.513503 | -0.503573 |
| 26               | 6                | 0              | -1.941955               | -3.646236 | 0.421689  |
| 27               | 6                | 0              | -4.587823               | -3.697803 | -0.451112 |
| 28               | 1                | 0              | -4.324482               | -1.605490 | -0.882068 |
| 29               | 6                | 0              | -2.674263               | -4.828706 | 0.456970  |
| 30               | 1                | 0              | -0.925764               | -3.638591 | 0.794652  |
| 31               | 6                | 0              | -3.995993               | -4.866959 | 0.023154  |
| 32               | 1                | 0              | -5.618222               | -3.706165 | -0.788793 |
| 33               | 1                | 0              | -2.203610               | -5.726463 | 0.842224  |
| 34               | 1                | 0              | -4.559266               | -5.791844 | 0.059831  |
| 35               | 6                | 0              | 3.709875                | -0.795052 | -0.107006 |
| 36               | 6                | 0              | 4.293228                | -0.135693 | 0.983314  |
| 37               | 6                | 0              | 4.540771                | -1.424630 | -1.041972 |
| 38               | 6                | 0              | 5.677951                | -0.081013 | 1.110631  |
| 39               | 1                | 0              | 3.659625                | 0.308052  | 1.743936  |
| 40               | 6                | 0              | 5.922405                | -1.359277 | -0.913538 |
| 41               | 1                | 0              | 4.084863                | -1.953335 | -1.872305 |
| 42               | 6                | 0              | 6.498857                | -0.685245 | 0.162408  |
| 43               | 1                | 0              | 6.116708                | 0.425990  | 1.963260  |
| 44               | 1                | 0              | 6.552962                | -1.841178 | -1.652767 |
| 45               | 1                | 0              | 7.576977                | -0.644584 | 0.267516  |

### Structure 39c (vacuum)

Energy (Hartrees): -1034.91643627  
No imaginary frequencies

Standard orientation:

| Center<br>Number | Atomic<br>Number | Atomic<br>Type | Coordinates (Angstroms) |           |           |
|------------------|------------------|----------------|-------------------------|-----------|-----------|
|                  |                  |                | X                       | Y         | Z         |
| 1                | 6                | 0              | 0.757355                | 1.877408  | -0.770885 |
| 2                | 6                | 0              | 0.730942                | 3.269186  | -0.759327 |
| 3                | 6                | 0              | -0.063224               | 3.936994  | 0.171562  |
| 4                | 6                | 0              | -0.816600               | 3.202652  | 1.089942  |
| 5                | 6                | 0              | -0.778903               | 1.819326  | 1.065972  |
| 6                | 6                | 0              | 0.000332                | 1.128337  | 0.127346  |
| 7                | 1                | 0              | 1.390427                | 1.365294  | -1.484376 |
| 8                | 1                | 0              | 1.333972                | 3.813406  | -1.473301 |
| 9                | 1                | 0              | -1.409688               | 3.740313  | 1.819431  |
| 10               | 1                | 0              | -1.346004               | 1.259146  | 1.802754  |
| 11               | 6                | 0              | 0.017577                | -0.353927 | 0.099012  |
| 12               | 6                | 0              | -1.122140               | -1.089205 | 0.052677  |
| 13               | 6                | 0              | 1.270086                | -1.092668 | 0.080232  |
| 14               | 1                | 0              | -1.056421               | -2.171610 | 0.048079  |
| 15               | 1                | 0              | 1.170679                | -2.187882 | 0.068875  |
| 16               | 7                | 0              | 2.418790                | -0.538247 | 0.091950  |
| 17               | 7                | 0              | -2.385540               | -0.583868 | -0.043556 |
| 18               | 1                | 0              | -2.463731               | 0.411566  | -0.206271 |
| 19               | 8                | 0              | -0.162775               | 5.288192  | 0.267564  |
| 20               | 6                | 0              | 0.600134                | 6.068152  | -0.629117 |
| 21               | 1                | 0              | 0.318258                | 5.867225  | -1.667608 |
| 22               | 1                | 0              | 0.379863                | 7.105960  | -0.389066 |
| 23               | 1                | 0              | 1.671168                | 5.883380  | -0.500134 |
| 24               | 6                | 0              | -3.574189               | -1.319184 | -0.042574 |
| 25               | 6                | 0              | -4.735761               | -0.710850 | -0.531170 |
| 26               | 6                | 0              | -3.643827               | -2.626367 | 0.447851  |
| 27               | 6                | 0              | -5.938246               | -1.400746 | -0.538765 |
| 28               | 1                | 0              | -4.684370               | 0.303209  | -0.913214 |
| 29               | 6                | 0              | -4.852738               | -3.311852 | 0.420199  |
| 30               | 1                | 0              | -2.771129               | -3.102092 | 0.876097  |
| 31               | 6                | 0              | -6.005544               | -2.710297 | -0.070815 |
| 32               | 1                | 0              | -6.827129               | -0.913430 | -0.921503 |
| 33               | 1                | 0              | -4.891749               | -4.324816 | 0.803266  |
| 34               | 1                | 0              | -6.943682               | -3.250229 | -0.082124 |
| 35               | 6                | 0              | 3.559635                | -1.356507 | 0.020291  |
| 36               | 6                | 0              | 4.653672                | -1.037708 | 0.831431  |
| 37               | 6                | 0              | 3.661343                | -2.436572 | -0.863861 |
| 38               | 6                | 0              | 5.804221                | -1.812350 | 0.793141  |
| 39               | 1                | 0              | 4.573072                | -0.182580 | 1.491792  |
| 40               | 6                | 0              | 4.822996                | -3.200198 | -0.907370 |
| 41               | 1                | 0              | 2.840230                | -2.653953 | -1.537928 |
| 42               | 6                | 0              | 5.895238                | -2.898288 | -0.075243 |
| 43               | 1                | 0              | 6.639481                | -1.563047 | 1.437380  |
| 44               | 1                | 0              | 4.892814                | -4.028499 | -1.603171 |
| 45               | 1                | 0              | 6.799241                | -3.494109 | -0.111420 |

### Structure 39c (CHCl<sub>3</sub>)

Energy (Hartrees): -1034.95067007

No imaginary frequencies

Standard orientation:

| Center<br>Number | Atomic<br>Number | Atomic<br>Type | Coordinates (Angstroms) |           |           |
|------------------|------------------|----------------|-------------------------|-----------|-----------|
|                  |                  |                | X                       | Y         | Z         |
| 1                | 6                | 0              | 0.640101                | 1.898965  | -0.857645 |
| 2                | 6                | 0              | 0.579413                | 3.289993  | -0.831554 |
| 3                | 6                | 0              | -0.146962               | 3.928486  | 0.174255  |
| 4                | 6                | 0              | -0.795795               | 3.165518  | 1.148743  |
| 5                | 6                | 0              | -0.724633               | 1.782557  | 1.108037  |
| 6                | 6                | 0              | -0.012369               | 1.121176  | 0.097728  |
| 7                | 1                | 0              | 1.210956                | 1.411671  | -1.639996 |
| 8                | 1                | 0              | 1.099400                | 3.856086  | -1.592902 |
| 9                | 1                | 0              | -1.340716               | 3.676317  | 1.934448  |
| 10               | 1                | 0              | -1.219061               | 1.202903  | 1.881662  |
| 11               | 6                | 0              | 0.039550                | -0.361596 | 0.045633  |
| 12               | 6                | 0              | -1.084705               | -1.128086 | 0.010411  |
| 13               | 6                | 0              | 1.305977                | -1.066336 | 0.023642  |
| 14               | 1                | 0              | -0.986554               | -2.207861 | -0.004585 |
| 15               | 1                | 0              | 1.236982                | -2.158692 | -0.064559 |
| 16               | 7                | 0              | 2.443411                | -0.488204 | 0.126146  |
| 17               | 7                | 0              | -2.355657               | -0.651271 | -0.034877 |
| 18               | 1                | 0              | -2.468829               | 0.351875  | -0.122620 |
| 19               | 8                | 0              | -0.274373               | 5.275122  | 0.287521  |
| 20               | 6                | 0              | 0.379805                | 6.083980  | -0.676978 |
| 21               | 1                | 0              | 0.002723                | 5.880447  | -1.683793 |
| 22               | 1                | 0              | 0.152636                | 7.114296  | -0.409760 |
| 23               | 1                | 0              | 1.462664                | 5.931777  | -0.650569 |
| 24               | 6                | 0              | -3.536618               | -1.401168 | -0.035626 |
| 25               | 6                | 0              | -4.736550               | -0.728889 | -0.298513 |
| 26               | 6                | 0              | -3.565640               | -2.773981 | 0.228968  |
| 27               | 6                | 0              | -5.940271               | -1.418046 | -0.302785 |
| 28               | 1                | 0              | -4.714185               | 0.337033  | -0.501167 |
| 29               | 6                | 0              | -4.779498               | -3.453300 | 0.214155  |
| 30               | 1                | 0              | -2.658436               | -3.316717 | 0.461148  |
| 31               | 6                | 0              | -5.971968               | -2.787832 | -0.050768 |
| 32               | 1                | 0              | -6.858587               | -0.879827 | -0.508444 |
| 33               | 1                | 0              | -4.787041               | -4.517298 | 0.422391  |
| 34               | 1                | 0              | -6.911690               | -3.326340 | -0.055641 |
| 35               | 6                | 0              | 3.602323                | -1.281115 | 0.047997  |
| 36               | 6                | 0              | 4.635389                | -1.042253 | 0.961798  |
| 37               | 6                | 0              | 3.778748                | -2.262791 | -0.935521 |
| 38               | 6                | 0              | 5.799362                | -1.798483 | 0.919831  |
| 39               | 1                | 0              | 4.501184                | -0.265676 | 1.706560  |
| 40               | 6                | 0              | 4.953935                | -3.007024 | -0.980582 |
| 41               | 1                | 0              | 3.003812                | -2.419340 | -1.678280 |
| 42               | 6                | 0              | 5.965464                | -2.785792 | -0.050800 |
| 43               | 1                | 0              | 6.584633                | -1.613508 | 1.644403  |
| 44               | 1                | 0              | 5.081020                | -3.758804 | -1.751925 |
| 45               | 1                | 0              | 6.879433                | -3.366907 | -0.087968 |

### Structure 39c (DMSO)

Energy (Hartrees): -1034.94664801

No imaginary frequencies

Standard orientation:

| Center<br>Number | Atomic<br>Number | Atomic<br>Type | Coordinates (Angstroms) |           |           |
|------------------|------------------|----------------|-------------------------|-----------|-----------|
|                  |                  |                | X                       | Y         | Z         |
| 1                | 6                | 0              | 0.641743                | 1.875735  | -0.860044 |
| 2                | 6                | 0              | 0.613123                | 3.268391  | -0.848132 |
| 3                | 6                | 0              | -0.078034               | 3.933850  | 0.166481  |
| 4                | 6                | 0              | -0.727613               | 3.193591  | 1.158935  |
| 5                | 6                | 0              | -0.687418               | 1.808672  | 1.132352  |
| 6                | 6                | 0              | -0.004967               | 1.121379  | 0.118642  |
| 7                | 1                | 0              | 1.179624                | 1.368857  | -1.653876 |
| 8                | 1                | 0              | 1.126720                | 3.814015  | -1.628722 |
| 9                | 1                | 0              | -1.253436               | 3.720663  | 1.947093  |
| 10               | 1                | 0              | -1.186730               | 1.249652  | 1.918020  |
| 11               | 6                | 0              | 0.025120                | -0.362799 | 0.088546  |
| 12               | 6                | 0              | -1.111624               | -1.115772 | 0.062539  |
| 13               | 6                | 0              | 1.276213                | -1.087240 | 0.071892  |
| 14               | 1                | 0              | -1.024543               | -2.196590 | 0.059621  |
| 15               | 1                | 0              | 1.185927                | -2.179329 | 0.017655  |
| 16               | 7                | 0              | 2.427684                | -0.523333 | 0.138302  |
| 17               | 7                | 0              | -2.372141               | -0.622619 | 0.011516  |
| 18               | 1                | 0              | -2.478312               | 0.382568  | -0.075088 |
| 19               | 8                | 0              | -0.169479               | 5.282188  | 0.268916  |
| 20               | 6                | 0              | 0.488517                | 6.063182  | -0.719201 |
| 21               | 1                | 0              | 0.087685                | 5.857917  | -1.716092 |
| 22               | 1                | 0              | 0.293893                | 7.102368  | -0.460945 |
| 23               | 1                | 0              | 1.566983                | 5.881481  | -0.711526 |
| 24               | 6                | 0              | -3.562095               | -1.359803 | -0.016631 |
| 25               | 6                | 0              | -4.747576               | -0.668469 | -0.295346 |
| 26               | 6                | 0              | -3.611690               | -2.734893 | 0.233134  |
| 27               | 6                | 0              | -5.959870               | -1.342656 | -0.330410 |
| 28               | 1                | 0              | -4.705658               | 0.398978  | -0.486887 |
| 29               | 6                | 0              | -4.833971               | -3.398384 | 0.188307  |
| 30               | 1                | 0              | -2.715442               | -3.292132 | 0.473933  |
| 31               | 6                | 0              | -6.013142               | -2.714762 | -0.092577 |
| 32               | 1                | 0              | -6.867294               | -0.791148 | -0.549534 |
| 33               | 1                | 0              | -4.858202               | -4.464550 | 0.384288  |
| 34               | 1                | 0              | -6.959085               | -3.241972 | -0.122309 |
| 35               | 6                | 0              | 3.575492                | -1.332285 | 0.053196  |
| 36               | 6                | 0              | 4.680917                | -0.997931 | 0.846159  |
| 37               | 6                | 0              | 3.679391                | -2.415367 | -0.830511 |
| 38               | 6                | 0              | 5.845080                | -1.754017 | 0.788292  |
| 39               | 1                | 0              | 4.606728                | -0.145824 | 1.513166  |
| 40               | 6                | 0              | 4.852068                | -3.162209 | -0.890718 |
| 41               | 1                | 0              | 2.849145                | -2.654299 | -1.486279 |
| 42               | 6                | 0              | 5.937278                | -2.841556 | -0.079210 |
| 43               | 1                | 0              | 6.687474                | -1.489197 | 1.417916  |
| 44               | 1                | 0              | 4.920052                | -3.993161 | -1.584420 |
| 45               | 1                | 0              | 6.849857                | -3.424079 | -0.130227 |



## Structure 39c (C<sub>2</sub>H<sub>5</sub>OH)

Energy (Hartrees): -1034.94965825

No imaginary frequencies

Standard orientation:

| Center<br>Number | Atomic<br>Number | Atomic<br>Type | Coordinates (Angstroms) |           |           |
|------------------|------------------|----------------|-------------------------|-----------|-----------|
|                  |                  |                | X                       | Y         | Z         |
| 1                | 6                | 0              | 0.610508                | 1.878232  | -0.895954 |
| 2                | 6                | 0              | 0.574161                | 3.270642  | -0.904660 |
| 3                | 6                | 0              | -0.096148               | 3.945034  | 0.116401  |
| 4                | 6                | 0              | -0.714948               | 3.220153  | 1.137772  |
| 5                | 6                | 0              | -0.665394               | 1.834840  | 1.132638  |
| 6                | 6                | 0              | -0.006465               | 1.136701  | 0.111404  |
| 7                | 1                | 0              | 1.130385                | 1.361737  | -1.695513 |
| 8                | 1                | 0              | 1.065263                | 3.808885  | -1.704452 |
| 9                | 1                | 0              | -1.222656               | 3.758551  | 1.930237  |
| 10               | 1                | 0              | -1.137414               | 1.284635  | 1.941095  |
| 11               | 6                | 0              | 0.030153                | -0.347503 | 0.100411  |
| 12               | 6                | 0              | -1.101290               | -1.107896 | 0.085614  |
| 13               | 6                | 0              | 1.284503                | -1.066654 | 0.095624  |
| 14               | 1                | 0              | -1.002745               | -2.187256 | 0.094663  |
| 15               | 1                | 0              | 1.197721                | -2.159110 | 0.047644  |
| 16               | 7                | 0              | 2.434852                | -0.501384 | 0.165119  |
| 17               | 7                | 0              | -2.368472               | -0.628966 | 0.055330  |
| 18               | 1                | 0              | -2.490229               | 0.377770  | 0.065277  |
| 19               | 8                | 0              | -0.196242               | 5.299681  | 0.198507  |
| 20               | 6                | 0              | 0.443818                | 6.072053  | -0.810171 |
| 21               | 1                | 0              | 0.028057                | 5.850021  | -1.796611 |
| 22               | 1                | 0              | 0.247009                | 7.112789  | -0.560410 |
| 23               | 1                | 0              | 1.522491                | 5.894026  | -0.812948 |
| 24               | 6                | 0              | -3.549650               | -1.380188 | -0.000669 |
| 25               | 6                | 0              | -4.763605               | -0.689190 | 0.098007  |
| 26               | 6                | 0              | -3.562886               | -2.769863 | -0.156001 |
| 27               | 6                | 0              | -5.967939               | -1.376649 | 0.046864  |
| 28               | 1                | 0              | -4.750754               | 0.389385  | 0.218413  |
| 29               | 6                | 0              | -4.778177               | -3.446235 | -0.200749 |
| 30               | 1                | 0              | -2.643865               | -3.332928 | -0.252213 |
| 31               | 6                | 0              | -5.985790               | -2.762253 | -0.100351 |
| 32               | 1                | 0              | -6.897619               | -0.824253 | 0.125533  |
| 33               | 1                | 0              | -4.773418               | -4.523744 | -0.322321 |
| 34               | 1                | 0              | -6.926039               | -3.299094 | -0.139250 |
| 35               | 6                | 0              | 3.579881                | -1.315936 | 0.085569  |
| 36               | 6                | 0              | 4.675961                | -1.004317 | 0.899815  |
| 37               | 6                | 0              | 3.687221                | -2.385183 | -0.814194 |
| 38               | 6                | 0              | 5.833868                | -1.770501 | 0.846709  |
| 39               | 1                | 0              | 4.599183                | -0.162681 | 1.579697  |
| 40               | 6                | 0              | 4.853607                | -3.142163 | -0.869603 |
| 41               | 1                | 0              | 2.864449                | -2.604136 | -1.486290 |
| 42               | 6                | 0              | 5.929397                | -2.844639 | -0.037142 |
| 43               | 1                | 0              | 6.668865                | -1.524158 | 1.493472  |
| 44               | 1                | 0              | 4.924300                | -3.962064 | -1.576136 |
| 45               | 1                | 0              | 6.837568                | -3.434283 | -0.085086 |

**Structure 39d (vacuum)**

Energy (Hartrees): -1034.91015853

No imaginary frequencies

Standard orientation:

| Center<br>Number | Atomic<br>Number | Atomic<br>Type | Coordinates (Angstroms) |           |           |
|------------------|------------------|----------------|-------------------------|-----------|-----------|
|                  |                  |                | X                       | Y         | Z         |
| 1                | 6                | 0              | -2.203799               | -0.965465 | 0.877518  |
| 2                | 6                | 0              | -3.240099               | -1.870215 | 0.990156  |
| 3                | 6                | 0              | -3.254437               | -3.030100 | 0.208049  |
| 4                | 6                | 0              | -2.219599               | -3.264543 | -0.691277 |
| 5                | 6                | 0              | -1.180990               | -2.338280 | -0.795506 |
| 6                | 6                | 0              | -1.140557               | -1.188447 | -0.011630 |
| 7                | 1                | 0              | -2.210168               | -0.069998 | 1.485742  |
| 8                | 1                | 0              | -4.058223               | -1.705234 | 1.680414  |
| 9                | 1                | 0              | -2.211051               | -4.141066 | -1.324983 |
| 10               | 1                | 0              | -0.398412               | -2.512029 | -1.526314 |
| 11               | 6                | 0              | 0.007676                | -0.256090 | -0.090707 |
| 12               | 6                | 0              | 1.266128                | -0.761094 | -0.161144 |
| 13               | 6                | 0              | -0.194146               | 1.187045  | -0.070787 |
| 14               | 1                | 0              | 0.704367                | 1.801312  | 0.081738  |
| 15               | 1                | 0              | 2.339308                | 0.838812  | -0.877679 |
| 16               | 1                | 0              | 1.414963                | -1.829358 | -0.036146 |
| 17               | 7                | 0              | -1.336320               | 1.742274  | -0.195250 |
| 18               | 7                | 0              | 2.415369                | -0.056526 | -0.421104 |
| 19               | 8                | 0              | -4.318393               | -3.856254 | 0.390689  |
| 20               | 6                | 0              | -4.371116               | -5.034973 | -0.382967 |
| 21               | 1                | 0              | -5.283682               | -5.549294 | -0.089789 |
| 22               | 1                | 0              | -4.410610               | -4.805241 | -1.452568 |
| 23               | 1                | 0              | -3.509434               | -5.679543 | -0.180838 |
| 24               | 6                | 0              | -1.420260               | 3.140084  | -0.063961 |
| 25               | 6                | 0              | -2.291541               | 3.826722  | -0.915439 |
| 26               | 6                | 0              | -0.711364               | 3.856097  | 0.907683  |
| 27               | 6                | 0              | -2.409976               | 5.206478  | -0.831241 |
| 28               | 1                | 0              | -2.857570               | 3.255406  | -1.641334 |
| 29               | 6                | 0              | -0.845960               | 5.237355  | 0.995741  |
| 30               | 1                | 0              | -0.085297               | 3.323322  | 1.614701  |
| 31               | 6                | 0              | -1.686370               | 5.919207  | 0.122807  |
| 32               | 1                | 0              | -3.077758               | 5.729380  | -1.505996 |
| 33               | 1                | 0              | -0.300799               | 5.780140  | 1.759384  |
| 34               | 1                | 0              | -1.791158               | 6.995011  | 0.195347  |
| 35               | 6                | 0              | 3.710120                | -0.522890 | -0.174503 |
| 36               | 6                | 0              | 4.786421                | 0.078890  | -0.836018 |
| 37               | 6                | 0              | 3.955569                | -1.563710 | 0.725050  |
| 38               | 6                | 0              | 6.080855                | -0.362609 | -0.609604 |
| 39               | 1                | 0              | 4.599152                | 0.887272  | -1.535065 |
| 40               | 6                | 0              | 5.256728                | -2.009648 | 0.927615  |
| 41               | 1                | 0              | 3.141780                | -2.003197 | 1.287853  |
| 42               | 6                | 0              | 6.325953                | -1.417046 | 0.266556  |
| 43               | 1                | 0              | 6.903108                | 0.115714  | -1.128747 |
| 44               | 1                | 0              | 5.432913                | -2.817837 | 1.627700  |
| 45               | 1                | 0              | 7.336965                | -1.764399 | 0.437204  |

## Structure 39d (CHCl<sub>3</sub>)

Energy (Hartrees): -1034.94518243

No imaginary frequencies

Standard orientation:

| Center<br>Number | Atomic<br>Number | Atomic<br>Type | Coordinates (Angstroms) |           |           |
|------------------|------------------|----------------|-------------------------|-----------|-----------|
|                  |                  |                | X                       | Y         | Z         |
| 1                | 6                | 0              | -2.153023               | -1.024466 | 0.905690  |
| 2                | 6                | 0              | -3.175303               | -1.946878 | 1.021613  |
| 3                | 6                | 0              | -3.187721               | -3.092705 | 0.217098  |
| 4                | 6                | 0              | -2.162387               | -3.297149 | -0.701768 |
| 5                | 6                | 0              | -1.139418               | -2.352786 | -0.809155 |
| 6                | 6                | 0              | -1.103970               | -1.212237 | -0.009034 |
| 7                | 1                | 0              | -2.158937               | -0.144783 | 1.538150  |
| 8                | 1                | 0              | -3.979573               | -1.802641 | 1.733820  |
| 9                | 1                | 0              | -2.149815               | -4.165868 | -1.346752 |
| 10               | 1                | 0              | -0.362146               | -2.508553 | -1.550068 |
| 11               | 6                | 0              | 0.022726                | -0.251571 | -0.096181 |
| 12               | 6                | 0              | 1.296254                | -0.732207 | -0.152460 |
| 13               | 6                | 0              | -0.215269               | 1.182378  | -0.086713 |
| 14               | 1                | 0              | 0.663389                | 1.821695  | 0.065808  |
| 15               | 1                | 0              | 2.339144                | 0.898269  | -0.841230 |
| 16               | 1                | 0              | 1.463314                | -1.796217 | -0.010708 |
| 17               | 7                | 0              | -1.373735               | 1.709899  | -0.221607 |
| 18               | 7                | 0              | 2.426979                | -0.010483 | -0.408004 |
| 19               | 8                | 0              | -4.236206               | -3.937044 | 0.399313  |
| 20               | 6                | 0              | -4.287061               | -5.106923 | -0.399696 |
| 21               | 1                | 0              | -5.188556               | -5.637862 | -0.099655 |
| 22               | 1                | 0              | -4.350559               | -4.857503 | -1.463142 |
| 23               | 1                | 0              | -3.415863               | -5.744528 | -0.221564 |
| 24               | 6                | 0              | -1.496273               | 3.104677  | -0.080869 |
| 25               | 6                | 0              | -2.389989               | 3.775452  | -0.923651 |
| 26               | 6                | 0              | -0.806484               | 3.832941  | 0.897285  |
| 27               | 6                | 0              | -2.553397               | 5.150598  | -0.821972 |
| 28               | 1                | 0              | -2.940727               | 3.200340  | -1.659562 |
| 29               | 6                | 0              | -0.984353               | 5.208864  | 1.001194  |
| 30               | 1                | 0              | -0.157290               | 3.314813  | 1.594919  |
| 31               | 6                | 0              | -1.850094               | 5.875172  | 0.139336  |
| 32               | 1                | 0              | -3.239790               | 5.659156  | -1.489790 |
| 33               | 1                | 0              | -0.451974               | 5.759151  | 1.769177  |
| 34               | 1                | 0              | -1.989260               | 6.946523  | 0.225331  |
| 35               | 6                | 0              | 3.733040                | -0.452276 | -0.167907 |
| 36               | 6                | 0              | 4.790441                | 0.195371  | -0.818208 |
| 37               | 6                | 0              | 4.007357                | -1.503475 | 0.711585  |
| 38               | 6                | 0              | 6.097825                | -0.214511 | -0.601777 |
| 39               | 1                | 0              | 4.575277                | 1.015260  | -1.495836 |
| 40               | 6                | 0              | 5.321905                | -1.915781 | 0.905286  |
| 41               | 1                | 0              | 3.206595                | -1.981190 | 1.262624  |
| 42               | 6                | 0              | 6.373613                | -1.279027 | 0.254614  |
| 43               | 1                | 0              | 6.906192                | 0.297235  | -1.111824 |
| 44               | 1                | 0              | 5.521971                | -2.733266 | 1.588748  |
| 45               | 1                | 0              | 7.395032                | -1.600345 | 0.418458  |

## Structure 39d (DMSO)

Energy (Hartrees): -1034.94127955

No imaginary frequencies

Standard orientation:

| Center<br>Number | Atomic<br>Number | Atomic<br>Type | Coordinates (Angstroms) |           |           |
|------------------|------------------|----------------|-------------------------|-----------|-----------|
|                  |                  |                | X                       | Y         | Z         |
| 1                | 6                | 0              | -2.077653               | -1.127176 | 0.937886  |
| 2                | 6                | 0              | -3.064318               | -2.089679 | 1.041173  |
| 3                | 6                | 0              | -3.036821               | -3.222172 | 0.216903  |
| 4                | 6                | 0              | -2.006972               | -3.370459 | -0.709150 |
| 5                | 6                | 0              | -1.021013               | -2.385173 | -0.803815 |
| 6                | 6                | 0              | -1.027274               | -1.256353 | 0.014066  |
| 7                | 1                | 0              | -2.110625               | -0.263221 | 1.591788  |
| 8                | 1                | 0              | -3.867284               | -1.987948 | 1.762617  |
| 9                | 1                | 0              | -1.961331               | -4.228138 | -1.367625 |
| 10               | 1                | 0              | -0.237596               | -2.503005 | -1.545515 |
| 11               | 6                | 0              | 0.052652                | -0.241256 | -0.057811 |
| 12               | 6                | 0              | 1.350343                | -0.659350 | -0.109571 |
| 13               | 6                | 0              | -0.266586               | 1.174697  | -0.049963 |
| 14               | 1                | 0              | 0.564327                | 1.869103  | 0.121965  |
| 15               | 1                | 0              | 2.315422                | 1.064075  | -0.658681 |
| 16               | 1                | 0              | 1.559285                | -1.718648 | 0.001243  |
| 17               | 7                | 0              | -1.453616               | 1.628596  | -0.223139 |
| 18               | 7                | 0              | 2.445829                | 0.119358  | -0.320528 |
| 19               | 8                | 0              | -4.047579               | -4.110091 | 0.388567  |
| 20               | 6                | 0              | -4.038173               | -5.278435 | -0.418817 |
| 21               | 1                | 0              | -4.910711               | -5.857991 | -0.123204 |
| 22               | 1                | 0              | -4.114388               | -5.025938 | -1.480439 |
| 23               | 1                | 0              | -3.134140               | -5.869761 | -0.246344 |
| 24               | 6                | 0              | -1.668007               | 3.013440  | -0.092649 |
| 25               | 6                | 0              | -2.565094               | 3.628611  | -0.974508 |
| 26               | 6                | 0              | -1.067546               | 3.782082  | 0.913366  |
| 27               | 6                | 0              | -2.819526               | 4.991100  | -0.881615 |
| 28               | 1                | 0              | -3.046660               | 3.025266  | -1.736405 |
| 29               | 6                | 0              | -1.336766               | 5.144198  | 1.007743  |
| 30               | 1                | 0              | -0.412673               | 3.305744  | 1.635066  |
| 31               | 6                | 0              | -2.205741               | 5.756857  | 0.108866  |
| 32               | 1                | 0              | -3.506406               | 5.455656  | -1.580510 |
| 33               | 1                | 0              | -0.870659               | 5.725968  | 1.795486  |
| 34               | 1                | 0              | -2.414221               | 6.817562  | 0.187176  |
| 35               | 6                | 0              | 3.775189                | -0.278247 | -0.134152 |
| 36               | 6                | 0              | 4.787488                | 0.537227  | -0.654919 |
| 37               | 6                | 0              | 4.119826                | -1.440797 | 0.563051  |
| 38               | 6                | 0              | 6.120150                | 0.186739  | -0.492280 |
| 39               | 1                | 0              | 4.517776                | 1.442697  | -1.189140 |
| 40               | 6                | 0              | 5.460236                | -1.787210 | 0.704796  |
| 41               | 1                | 0              | 3.358099                | -2.064833 | 1.013473  |
| 42               | 6                | 0              | 6.467830                | -0.982771 | 0.182071  |
| 43               | 1                | 0              | 6.890790                | 0.830857  | -0.900646 |
| 44               | 1                | 0              | 5.714061                | -2.691230 | 1.247107  |
| 45               | 1                | 0              | 7.508737                | -1.256389 | 0.305698  |

## Structure 39d (C<sub>2</sub>H<sub>5</sub>OH)

Energy (Hartrees): -1034.94453227

No imaginary frequencies

Standard orientation:

| Center<br>Number | Atomic<br>Number | Atomic<br>Type | Coordinates (Angstroms) |           |           |
|------------------|------------------|----------------|-------------------------|-----------|-----------|
|                  |                  |                | X                       | Y         | Z         |
| 1                | 6                | 0              | -2.059156               | -1.154541 | 0.961605  |
| 2                | 6                | 0              | -3.038039               | -2.126096 | 1.057315  |
| 3                | 6                | 0              | -3.004713               | -3.244631 | 0.216262  |
| 4                | 6                | 0              | -1.980530               | -3.374996 | -0.716952 |
| 5                | 6                | 0              | -1.002651               | -2.381208 | -0.803281 |
| 6                | 6                | 0              | -1.013700               | -1.263865 | 0.030053  |
| 7                | 1                | 0              | -2.095238               | -0.298974 | 1.626579  |
| 8                | 1                | 0              | -3.839335               | -2.041167 | 1.783254  |
| 9                | 1                | 0              | -1.933381               | -4.223153 | -1.387550 |
| 10               | 1                | 0              | -0.222996               | -2.482063 | -1.551475 |
| 11               | 6                | 0              | 0.055839                | -0.237536 | -0.038000 |
| 12               | 6                | 0              | 1.356844                | -0.642243 | -0.094748 |
| 13               | 6                | 0              | -0.278845               | 1.175049  | -0.029696 |
| 14               | 1                | 0              | 0.542775                | 1.877113  | 0.155151  |
| 15               | 1                | 0              | 2.308119                | 1.084599  | -0.664709 |
| 16               | 1                | 0              | 1.577419                | -1.699456 | 0.014742  |
| 17               | 7                | 0              | -1.467553               | 1.617762  | -0.218407 |
| 18               | 7                | 0              | 2.445280                | 0.146157  | -0.312177 |
| 19               | 8                | 0              | -4.012659               | -4.146029 | 0.380425  |
| 20               | 6                | 0              | -4.010988               | -5.293933 | -0.458907 |
| 21               | 1                | 0              | -4.882345               | -5.879224 | -0.171269 |
| 22               | 1                | 0              | -4.095474               | -5.009923 | -1.511603 |
| 23               | 1                | 0              | -3.105883               | -5.888478 | -0.306811 |
| 24               | 6                | 0              | -1.692922               | 3.001760  | -0.091389 |
| 25               | 6                | 0              | -2.564787               | 3.615185  | -0.999028 |
| 26               | 6                | 0              | -1.127038               | 3.769751  | 0.934345  |
| 27               | 6                | 0              | -2.827125               | 4.976408  | -0.910895 |
| 28               | 1                | 0              | -3.020796               | 3.011732  | -1.776507 |
| 29               | 6                | 0              | -1.404521               | 5.130680  | 1.023968  |
| 30               | 1                | 0              | -0.493581               | 3.293171  | 1.674923  |
| 31               | 6                | 0              | -2.247600               | 5.742068  | 0.100037  |
| 32               | 1                | 0              | -3.494015               | 5.440198  | -1.629536 |
| 33               | 1                | 0              | -0.965338               | 5.712451  | 1.827172  |
| 34               | 1                | 0              | -2.462642               | 6.801878  | 0.174270  |
| 35               | 6                | 0              | 3.777344                | -0.246793 | -0.131496 |
| 36               | 6                | 0              | 4.785062                | 0.548467  | -0.690269 |
| 37               | 6                | 0              | 4.126766                | -1.388087 | 0.597453  |
| 38               | 6                | 0              | 6.118572                | 0.198267  | -0.533302 |
| 39               | 1                | 0              | 4.511785                | 1.437567  | -1.249870 |
| 40               | 6                | 0              | 5.467497                | -1.735648 | 0.732600  |
| 41               | 1                | 0              | 3.367539                | -1.992847 | 1.077785  |
| 42               | 6                | 0              | 6.470710                | -0.951393 | 0.172225  |
| 43               | 1                | 0              | 6.886617                | 0.826031  | -0.971264 |
| 44               | 1                | 0              | 5.725518                | -2.623529 | 1.299349  |
| 45               | 1                | 0              | 7.512309                | -1.225125 | 0.290662  |

## Structure 39e (vacuum)

Energy (Hartrees): -1034.90547117

No imaginary frequencies

Standard orientation:

| Center<br>Number | Atomic<br>Number | Atomic<br>Type | Coordinates (Angstroms) |           |           |
|------------------|------------------|----------------|-------------------------|-----------|-----------|
|                  |                  |                | X                       | Y         | Z         |
| 1                | 6                | 0              | 2.619124                | 0.444724  | -0.660448 |
| 2                | 6                | 0              | 3.975164                | 0.638491  | -0.419992 |
| 3                | 6                | 0              | 4.703717                | -0.335425 | 0.263069  |
| 4                | 6                | 0              | 4.059700                | -1.490447 | 0.706455  |
| 5                | 6                | 0              | 2.708262                | -1.666335 | 0.462517  |
| 6                | 6                | 0              | 1.961072                | -0.711383 | -0.240182 |
| 7                | 1                | 0              | 2.066197                | 1.211120  | -1.188078 |
| 8                | 1                | 0              | 4.445927                | 1.547607  | -0.768779 |
| 9                | 1                | 0              | 4.634761                | -2.225547 | 1.255878  |
| 10               | 1                | 0              | 2.213361                | -2.551618 | 0.846825  |
| 11               | 6                | 0              | 0.534239                | -0.949038 | -0.556773 |
| 12               | 6                | 0              | 0.136924                | -2.187468 | -0.935314 |
| 13               | 6                | 0              | -0.440299               | 0.143254  | -0.518472 |
| 14               | 1                | 0              | -1.391163               | -0.043813 | -1.030783 |
| 15               | 1                | 0              | -1.254601               | -3.438262 | -1.715164 |
| 16               | 1                | 0              | 0.896173                | -2.936266 | -1.146598 |
| 17               | 7                | 0              | -0.216091               | 1.253066  | 0.066853  |
| 18               | 7                | 0              | -1.161531               | -2.630997 | -1.118654 |
| 19               | 8                | 0              | 6.028938                | -0.241727 | 0.551136  |
| 20               | 6                | 0              | 6.709353                | 0.921872  | 0.132390  |
| 21               | 1                | 0              | 7.739643                | 0.804008  | 0.460869  |
| 22               | 1                | 0              | 6.684355                | 1.024925  | -0.957169 |
| 23               | 1                | 0              | 6.280854                | 1.817947  | 0.592374  |
| 24               | 6                | 0              | -1.192130               | 2.263983  | -0.023548 |
| 25               | 6                | 0              | -1.454726               | 3.022658  | 1.120975  |
| 26               | 6                | 0              | -1.864615               | 2.565031  | -1.212504 |
| 27               | 6                | 0              | -2.408124               | 4.030132  | 1.088624  |
| 28               | 1                | 0              | -0.904172               | 2.795731  | 2.026129  |
| 29               | 6                | 0              | -2.806448               | 3.587449  | -1.242216 |
| 30               | 1                | 0              | -1.624397               | 2.016193  | -2.116180 |
| 31               | 6                | 0              | -3.088758               | 4.317390  | -0.092712 |
| 32               | 1                | 0              | -2.615839               | 4.601563  | 1.985871  |
| 33               | 1                | 0              | -3.315474               | 3.819343  | -2.170588 |
| 34               | 1                | 0              | -3.821942               | 5.114369  | -0.120062 |
| 35               | 6                | 0              | -2.293802               | -2.383381 | -0.316137 |
| 36               | 6                | 0              | -3.544641               | -2.756773 | -0.815125 |
| 37               | 6                | 0              | -2.207713               | -1.819694 | 0.960039  |
| 38               | 6                | 0              | -4.689475               | -2.570901 | -0.052699 |
| 39               | 1                | 0              | -3.614589               | -3.185494 | -1.809485 |
| 40               | 6                | 0              | -3.362681               | -1.627337 | 1.707447  |
| 41               | 1                | 0              | -1.245715               | -1.534517 | 1.366108  |
| 42               | 6                | 0              | -4.608697               | -1.997786 | 1.211960  |
| 43               | 1                | 0              | -5.650479               | -2.866982 | -0.456633 |
| 44               | 1                | 0              | -3.280725               | -1.185548 | 2.693671  |
| 45               | 1                | 0              | -5.503006               | -1.839528 | 1.801190  |

### Structure 39e (CHCl<sub>3</sub>)

Energy (Hartrees): -1034.93908173  
No imaginary frequencies

Standard orientation:

| Center<br>Number | Atomic<br>Number | Atomic<br>Type | Coordinates (Angstroms) |           |           |
|------------------|------------------|----------------|-------------------------|-----------|-----------|
|                  |                  |                | X                       | Y         | Z         |
| 1                | 6                | 0              | 2.636423                | 0.448170  | -0.666676 |
| 2                | 6                | 0              | 3.993068                | 0.659656  | -0.439693 |
| 3                | 6                | 0              | 4.736717                | -0.300144 | 0.248552  |
| 4                | 6                | 0              | 4.106374                | -1.457263 | 0.709097  |
| 5                | 6                | 0              | 2.752921                | -1.648503 | 0.481859  |
| 6                | 6                | 0              | 1.988877                | -0.707357 | -0.223330 |
| 7                | 1                | 0              | 2.076029                | 1.200931  | -1.207920 |
| 8                | 1                | 0              | 4.453947                | 1.567907  | -0.805124 |
| 9                | 1                | 0              | 4.689449                | -2.186045 | 1.260266  |
| 10               | 1                | 0              | 2.273264                | -2.537500 | 0.877651  |
| 11               | 6                | 0              | 0.558835                | -0.959062 | -0.521138 |
| 12               | 6                | 0              | 0.166953                | -2.210221 | -0.878952 |
| 13               | 6                | 0              | -0.422536               | 0.121814  | -0.492826 |
| 14               | 1                | 0              | -1.360208               | -0.072383 | -1.024656 |
| 15               | 1                | 0              | -1.196807               | -3.510577 | -1.608082 |
| 16               | 1                | 0              | 0.928872                | -2.954030 | -1.097657 |
| 17               | 7                | 0              | -0.230019               | 1.236968  | 0.100696  |
| 18               | 7                | 0              | -1.117251               | -2.679528 | -1.038323 |
| 19               | 8                | 0              | 6.062827                | -0.190136 | 0.521555  |
| 20               | 6                | 0              | 6.722885                | 0.997991  | 0.118047  |
| 21               | 1                | 0              | 7.754733                | 0.896698  | 0.449333  |
| 22               | 1                | 0              | 6.701747                | 1.114079  | -0.969605 |
| 23               | 1                | 0              | 6.276007                | 1.877044  | 0.592024  |
| 24               | 6                | 0              | -1.224722               | 2.229045  | -0.011464 |
| 25               | 6                | 0              | -1.525967               | 2.988196  | 1.124747  |
| 26               | 6                | 0              | -1.882949               | 2.509494  | -1.214788 |
| 27               | 6                | 0              | -2.496277               | 3.980014  | 1.067351  |
| 28               | 1                | 0              | -0.993739               | 2.779107  | 2.046016  |
| 29               | 6                | 0              | -2.843651               | 3.514102  | -1.268247 |
| 30               | 1                | 0              | -1.619532               | 1.958654  | -2.111149 |
| 31               | 6                | 0              | -3.160684               | 4.247502  | -0.128521 |
| 32               | 1                | 0              | -2.731174               | 4.552431  | 1.957843  |
| 33               | 1                | 0              | -3.341455               | 3.727838  | -2.207578 |
| 34               | 1                | 0              | -3.909161               | 5.030026  | -0.174720 |
| 35               | 6                | 0              | -2.273024               | -2.390564 | -0.285812 |
| 36               | 6                | 0              | -3.509400               | -2.770469 | -0.816448 |
| 37               | 6                | 0              | -2.224841               | -1.789926 | 0.976626  |
| 38               | 6                | 0              | -4.679257               | -2.544387 | -0.102219 |
| 39               | 1                | 0              | -3.544752               | -3.237692 | -1.795259 |
| 40               | 6                | 0              | -3.403673               | -1.557928 | 1.675421  |
| 41               | 1                | 0              | -1.274696               | -1.508388 | 1.413276  |
| 42               | 6                | 0              | -4.636751               | -1.927970 | 1.144975  |
| 43               | 1                | 0              | -5.628997               | -2.845184 | -0.530085 |
| 44               | 1                | 0              | -3.351079               | -1.087813 | 2.651018  |
| 45               | 1                | 0              | -5.550099               | -1.739230 | 1.695975  |

## Structure 39e (DMSO)

Energy (Hartrees): -1034.93501546

No imaginary frequencies

Standard orientation:

| Center<br>Number | Atomic<br>Number | Atomic<br>Type | Coordinates (Angstroms) |           |           |
|------------------|------------------|----------------|-------------------------|-----------|-----------|
|                  |                  |                | X                       | Y         | Z         |
| 1                | 6                | 0              | 2.637267                | 0.443736  | -0.685885 |
| 2                | 6                | 0              | 3.991594                | 0.677123  | -0.464283 |
| 3                | 6                | 0              | 4.743225                | -0.250173 | 0.260996  |
| 4                | 6                | 0              | 4.121580                | -1.396941 | 0.760172  |
| 5                | 6                | 0              | 2.770284                | -1.611169 | 0.535407  |
| 6                | 6                | 0              | 1.998894                | -0.701829 | -0.202893 |
| 7                | 1                | 0              | 2.072593                | 1.168751  | -1.260784 |
| 8                | 1                | 0              | 4.445200                | 1.574210  | -0.864765 |
| 9                | 1                | 0              | 4.708894                | -2.103617 | 1.335543  |
| 10               | 1                | 0              | 2.300369                | -2.495391 | 0.953220  |
| 11               | 6                | 0              | 0.572139                | -0.975192 | -0.497213 |
| 12               | 6                | 0              | 0.196216                | -2.236531 | -0.845559 |
| 13               | 6                | 0              | -0.418481               | 0.092937  | -0.475105 |
| 14               | 1                | 0              | -1.348877               | -0.106814 | -1.016935 |
| 15               | 1                | 0              | -1.149812               | -3.565766 | -1.552599 |
| 16               | 1                | 0              | 0.966523                | -2.972126 | -1.062209 |
| 17               | 7                | 0              | -0.244786               | 1.210658  | 0.124267  |
| 18               | 7                | 0              | -1.076640               | -2.724516 | -0.994953 |
| 19               | 8                | 0              | 6.065375                | -0.115408 | 0.531817  |
| 20               | 6                | 0              | 6.724070                | 1.037067  | 0.026083  |
| 21               | 1                | 0              | 7.760320                | 0.958917  | 0.349345  |
| 22               | 1                | 0              | 6.685821                | 1.065490  | -1.066734 |
| 23               | 1                | 0              | 6.287368                | 1.953213  | 0.433834  |
| 24               | 6                | 0              | -1.251036               | 2.190452  | 0.001059  |
| 25               | 6                | 0              | -1.566618               | 2.954093  | 1.131044  |
| 26               | 6                | 0              | -1.908165               | 2.454711  | -1.207364 |
| 27               | 6                | 0              | -2.550768               | 3.932614  | 1.064442  |
| 28               | 1                | 0              | -1.038736               | 2.758998  | 2.058288  |
| 29               | 6                | 0              | -2.883622               | 3.445054  | -1.269420 |
| 30               | 1                | 0              | -1.635431               | 1.902008  | -2.099926 |
| 31               | 6                | 0              | -3.214795               | 4.182482  | -0.135670 |
| 32               | 1                | 0              | -2.796268               | 4.507365  | 1.950688  |
| 33               | 1                | 0              | -3.380796               | 3.645803  | -2.212112 |
| 34               | 1                | 0              | -3.974224               | 4.954018  | -0.189977 |
| 35               | 6                | 0              | -2.245456               | -2.399946 | -0.277510 |
| 36               | 6                | 0              | -3.479479               | -2.719009 | -0.850451 |
| 37               | 6                | 0              | -2.207509               | -1.825786 | 0.998122  |
| 38               | 6                | 0              | -4.659434               | -2.455632 | -0.164048 |
| 39               | 1                | 0              | -3.504426               | -3.169512 | -1.837228 |
| 40               | 6                | 0              | -3.394511               | -1.556076 | 1.668949  |
| 41               | 1                | 0              | -1.257534               | -1.599341 | 1.467282  |
| 42               | 6                | 0              | -4.626696               | -1.863428 | 1.095273  |
| 43               | 1                | 0              | -5.608428               | -2.707699 | -0.624080 |
| 44               | 1                | 0              | -3.350994               | -1.111544 | 2.657143  |
| 45               | 1                | 0              | -5.546779               | -1.648033 | 1.625405  |



## Structure 39e (C<sub>2</sub>H<sub>5</sub>OH)

Energy (Hartrees): -1034.93873872

No imaginary frequencies

Standard orientation:

| Center<br>Number | Atomic<br>Number | Atomic<br>Type | Coordinates (Angstroms) |           |           |
|------------------|------------------|----------------|-------------------------|-----------|-----------|
|                  |                  |                | X                       | Y         | Z         |
| 1                | 6                | 0              | 2.640039                | 0.444546  | -0.697272 |
| 2                | 6                | 0              | 3.993729                | 0.680755  | -0.474608 |
| 3                | 6                | 0              | 4.741402                | -0.241413 | 0.258926  |
| 4                | 6                | 0              | 4.122425                | -1.384998 | 0.765405  |
| 5                | 6                | 0              | 2.771452                | -1.601398 | 0.540192  |
| 6                | 6                | 0              | 2.001769                | -0.697729 | -0.206321 |
| 7                | 1                | 0              | 2.075579                | 1.164433  | -1.278914 |
| 8                | 1                | 0              | 4.448495                | 1.575069  | -0.880043 |
| 9                | 1                | 0              | 4.710474                | -2.086445 | 1.346855  |
| 10               | 1                | 0              | 2.300580                | -2.481826 | 0.965005  |
| 11               | 6                | 0              | 0.575055                | -0.973737 | -0.498915 |
| 12               | 6                | 0              | 0.203069                | -2.237116 | -0.843461 |
| 13               | 6                | 0              | -0.418493               | 0.091625  | -0.474311 |
| 14               | 1                | 0              | -1.348302               | -0.110293 | -1.016197 |
| 15               | 1                | 0              | -1.138550               | -3.576566 | -1.541955 |
| 16               | 1                | 0              | 0.976073                | -2.969881 | -1.060417 |
| 17               | 7                | 0              | -0.248601               | 1.208881  | 0.127163  |
| 18               | 7                | 0              | -1.067473               | -2.732403 | -0.988674 |
| 19               | 8                | 0              | 6.068296                | -0.103941 | 0.533691  |
| 20               | 6                | 0              | 6.731257                | 1.048312  | 0.029178  |
| 21               | 1                | 0              | 7.765233                | 0.967369  | 0.359339  |
| 22               | 1                | 0              | 6.697561                | 1.072333  | -1.063560 |
| 23               | 1                | 0              | 6.291415                | 1.963398  | 0.435072  |
| 24               | 6                | 0              | -1.259729               | 2.184220  | 0.003568  |
| 25               | 6                | 0              | -1.581719               | 2.945582  | 1.133069  |
| 26               | 6                | 0              | -1.914271               | 2.447196  | -1.206260 |
| 27               | 6                | 0              | -2.570439               | 3.919326  | 1.064615  |
| 28               | 1                | 0              | -1.055301               | 2.753164  | 2.061757  |
| 29               | 6                | 0              | -2.894657               | 3.432546  | -1.270334 |
| 30               | 1                | 0              | -1.635889               | 1.897451  | -2.099016 |
| 31               | 6                | 0              | -3.232827               | 4.167022  | -0.136824 |
| 32               | 1                | 0              | -2.820599               | 4.492438  | 1.950762  |
| 33               | 1                | 0              | -3.390196               | 3.631587  | -2.214367 |
| 34               | 1                | 0              | -3.996206               | 4.934725  | -0.192317 |
| 35               | 6                | 0              | -2.238284               | -2.402599 | -0.275692 |
| 36               | 6                | 0              | -3.471832               | -2.715095 | -0.852411 |
| 37               | 6                | 0              | -2.200691               | -1.831368 | 1.001133  |
| 38               | 6                | 0              | -4.652479               | -2.447284 | -0.168554 |
| 39               | 1                | 0              | -3.497176               | -3.163464 | -1.840245 |
| 40               | 6                | 0              | -3.387936               | -1.556589 | 1.669120  |
| 41               | 1                | 0              | -1.250449               | -1.610325 | 1.472704  |
| 42               | 6                | 0              | -4.620078               | -1.857071 | 1.091496  |
| 43               | 1                | 0              | -5.601566               | -2.694012 | -0.631531 |
| 44               | 1                | 0              | -3.345039               | -1.113400 | 2.658024  |
| 45               | 1                | 0              | -5.540541               | -1.637970 | 1.619646  |

## Structure 39f (vacuum)

Energy (Hartrees): -1034.90120251

No imaginary frequencies

Standard orientation:

| Center<br>Number | Atomic<br>Number | Atomic<br>Type | Coordinates (Angstroms) |           |           |
|------------------|------------------|----------------|-------------------------|-----------|-----------|
|                  |                  |                | X                       | Y         | Z         |
| 1                | 6                | 0              | -2.705707               | 0.407871  | 1.077181  |
| 2                | 6                | 0              | -4.032566               | 0.739600  | 1.280661  |
| 3                | 6                | 0              | -4.995132               | 0.397574  | 0.328043  |
| 4                | 6                | 0              | -4.606480               | -0.270165 | -0.830523 |
| 5                | 6                | 0              | -3.261722               | -0.585518 | -1.023803 |
| 6                | 6                | 0              | -2.290418               | -0.268194 | -0.078815 |
| 7                | 1                | 0              | -1.975411               | 0.660902  | 1.838866  |
| 8                | 1                | 0              | -4.354800               | 1.256030  | 2.176606  |
| 9                | 1                | 0              | -5.325620               | -0.534466 | -1.594093 |
| 10               | 1                | 0              | -2.964989               | -1.075950 | -1.944885 |
| 11               | 6                | 0              | -0.856192               | -0.621254 | -0.280155 |
| 12               | 6                | 0              | -0.553441               | -1.905499 | -0.610160 |
| 13               | 6                | 0              | 0.103660                | 0.473005  | -0.179802 |
| 14               | 1                | 0              | -1.393692               | -2.570621 | -0.792907 |
| 15               | 1                | 0              | -0.270675               | 1.399778  | 0.275157  |
| 16               | 1                | 0              | 0.607120                | -3.430433 | -1.223927 |
| 17               | 7                | 0              | 1.288886                | 0.403803  | -0.648264 |
| 18               | 7                | 0              | 0.654297                | -2.534752 | -0.763980 |
| 19               | 8                | 0              | -6.273353               | 0.758659  | 0.617639  |
| 20               | 6                | 0              | -7.275507               | 0.426551  | -0.318856 |
| 21               | 1                | 0              | -8.211262               | 0.794436  | 0.096185  |
| 22               | 1                | 0              | -7.091976               | 0.909491  | -1.283991 |
| 23               | 1                | 0              | -7.341594               | -0.657082 | -0.460560 |
| 24               | 6                | 0              | 1.874668                | -2.293622 | -0.097517 |
| 25               | 6                | 0              | 3.061525                | -2.690212 | -0.711191 |
| 26               | 6                | 0              | 1.912888                | -1.717468 | 1.171120  |
| 27               | 6                | 0              | 4.277545                | -2.491187 | -0.070011 |
| 28               | 1                | 0              | 3.026668                | -3.127928 | -1.703011 |
| 29               | 6                | 0              | 3.133140                | -1.509552 | 1.799321  |
| 30               | 1                | 0              | 0.986969                | -1.428230 | 1.653506  |
| 31               | 6                | 0              | 4.321539                | -1.888891 | 1.182941  |
| 32               | 1                | 0              | 5.194998                | -2.793210 | -0.561207 |
| 33               | 1                | 0              | 3.154909                | -1.047459 | 2.779454  |
| 34               | 1                | 0              | 5.271414                | -1.717403 | 1.673936  |
| 35               | 6                | 0              | 2.169958                | 1.477654  | -0.453765 |
| 36               | 6                | 0              | 3.019526                | 1.835546  | -1.505498 |
| 37               | 6                | 0              | 2.275426                | 2.153191  | 0.767261  |
| 38               | 6                | 0              | 3.917752                | 2.881799  | -1.354902 |
| 39               | 1                | 0              | 2.950042                | 1.282152  | -2.434346 |
| 40               | 6                | 0              | 3.188449                | 3.191662  | 0.916196  |
| 41               | 1                | 0              | 1.662425                | 1.837988  | 1.604740  |
| 42               | 6                | 0              | 4.006558                | 3.566109  | -0.143973 |
| 43               | 1                | 0              | 4.560204                | 3.159858  | -2.182377 |
| 44               | 1                | 0              | 3.267773                | 3.702448  | 1.869085  |
| 45               | 1                | 0              | 4.719239                | 4.373064  | -0.024145 |

## Structure 39f (CHCl<sub>3</sub>)

Energy (Hartrees): -1034.93470000

No imaginary frequencies

Standard orientation:

| Center<br>Number | Atomic<br>Number | Atomic<br>Type | Coordinates (Angstroms) |           |           |
|------------------|------------------|----------------|-------------------------|-----------|-----------|
|                  |                  |                | X                       | Y         | Z         |
| 1                | 6                | 0              | -2.685476               | 0.483352  | 1.032780  |
| 2                | 6                | 0              | -4.015190               | 0.807449  | 1.240366  |
| 3                | 6                | 0              | -4.990106               | 0.393683  | 0.328741  |
| 4                | 6                | 0              | -4.610135               | -0.338217 | -0.794991 |
| 5                | 6                | 0              | -3.263888               | -0.643406 | -0.994907 |
| 6                | 6                | 0              | -2.278517               | -0.254210 | -0.089042 |
| 7                | 1                | 0              | -1.949448               | 0.795501  | 1.766516  |
| 8                | 1                | 0              | -4.322803               | 1.373078  | 2.112548  |
| 9                | 1                | 0              | -5.339277               | -0.662740 | -1.525780 |
| 10               | 1                | 0              | -2.982318               | -1.189349 | -1.889532 |
| 11               | 6                | 0              | -0.840485               | -0.600073 | -0.290206 |
| 12               | 6                | 0              | -0.532339               | -1.882257 | -0.636030 |
| 13               | 6                | 0              | 0.110521                | 0.497900  | -0.179465 |
| 14               | 1                | 0              | -1.367019               | -2.545389 | -0.846822 |
| 15               | 1                | 0              | -0.267729               | 1.415847  | 0.287215  |
| 16               | 1                | 0              | 0.612937                | -3.404138 | -1.263018 |
| 17               | 7                | 0              | 1.296671                | 0.450948  | -0.656494 |
| 18               | 7                | 0              | 0.670672                | -2.515249 | -0.785143 |
| 19               | 8                | 0              | -6.269061               | 0.750209  | 0.617421  |
| 20               | 6                | 0              | -7.289401               | 0.318057  | -0.266718 |
| 21               | 1                | 0              | -8.225377               | 0.684696  | 0.150740  |
| 22               | 1                | 0              | -7.151539               | 0.739591  | -1.266943 |
| 23               | 1                | 0              | -7.323070               | -0.773994 | -0.327090 |
| 24               | 6                | 0              | 1.887751                | -2.315469 | -0.106369 |
| 25               | 6                | 0              | 3.054311                | -2.825626 | -0.680922 |
| 26               | 6                | 0              | 1.951772                | -1.683219 | 1.135857  |
| 27               | 6                | 0              | 4.272645                | -2.685730 | -0.028594 |
| 28               | 1                | 0              | 2.998783                | -3.317257 | -1.646685 |
| 29               | 6                | 0              | 3.176193                | -1.542158 | 1.777977  |
| 30               | 1                | 0              | 1.046193                | -1.308499 | 1.596580  |
| 31               | 6                | 0              | 4.343131                | -2.034849 | 1.200465  |
| 32               | 1                | 0              | 5.171828                | -3.079698 | -0.488599 |
| 33               | 1                | 0              | 3.216083                | -1.041879 | 2.739200  |
| 34               | 1                | 0              | 5.295678                | -1.914717 | 1.702673  |
| 35               | 6                | 0              | 2.156584                | 1.543609  | -0.457566 |
| 36               | 6                | 0              | 2.992178                | 1.929267  | -1.512249 |
| 37               | 6                | 0              | 2.254684                | 2.212532  | 0.769029  |
| 38               | 6                | 0              | 3.871455                | 2.992478  | -1.357997 |
| 39               | 1                | 0              | 2.930542                | 1.385918  | -2.448496 |
| 40               | 6                | 0              | 3.148466                | 3.268291  | 0.920870  |
| 41               | 1                | 0              | 1.650878                | 1.882934  | 1.608055  |
| 42               | 6                | 0              | 3.953978                | 3.668269  | -0.141115 |
| 43               | 1                | 0              | 4.503140                | 3.289616  | -2.187686 |
| 44               | 1                | 0              | 3.222752                | 3.772853  | 1.878007  |
| 45               | 1                | 0              | 4.652045                | 4.488012  | -0.018281 |

## Structure 39f (DMSO)

Energy (Hartrees): -1034.93163485

No imaginary frequencies

Standard orientation:

| Center<br>Number | Atomic<br>Number | Atomic<br>Type | Coordinates (Angstroms) |           |           |
|------------------|------------------|----------------|-------------------------|-----------|-----------|
|                  |                  |                | X                       | Y         | Z         |
| 1                | 6                | 0              | -2.689903               | 0.537423  | 1.011935  |
| 2                | 6                | 0              | -4.019798               | 0.866847  | 1.215011  |
| 3                | 6                | 0              | -5.000673               | 0.422800  | 0.322998  |
| 4                | 6                | 0              | -4.624347               | -0.342869 | -0.780382 |
| 5                | 6                | 0              | -3.278843               | -0.653877 | -0.976585 |
| 6                | 6                | 0              | -2.288355               | -0.236767 | -0.087425 |
| 7                | 1                | 0              | -1.952153               | 0.874836  | 1.732590  |
| 8                | 1                | 0              | -4.319945               | 1.459386  | 2.072056  |
| 9                | 1                | 0              | -5.355847               | -0.693360 | -1.496882 |
| 10               | 1                | 0              | -3.004106               | -1.231931 | -1.853147 |
| 11               | 6                | 0              | -0.852657               | -0.596131 | -0.283274 |
| 12               | 6                | 0              | -0.553467               | -1.887116 | -0.610062 |
| 13               | 6                | 0              | 0.108048                | 0.492332  | -0.180240 |
| 14               | 1                | 0              | -1.389707               | -2.548911 | -0.817883 |
| 15               | 1                | 0              | -0.242003               | 1.402109  | 0.321637  |
| 16               | 1                | 0              | 0.584277                | -3.429064 | -1.203405 |
| 17               | 7                | 0              | 1.279520                | 0.444604  | -0.696860 |
| 18               | 7                | 0              | 0.644019                | -2.531183 | -0.739918 |
| 19               | 8                | 0              | -6.277996               | 0.781680  | 0.607678  |
| 20               | 6                | 0              | -7.299575               | 0.314681  | -0.261318 |
| 21               | 1                | 0              | -8.237525               | 0.684225  | 0.148956  |
| 22               | 1                | 0              | -7.168865               | 0.707636  | -1.273740 |
| 23               | 1                | 0              | -7.322273               | -0.778649 | -0.290842 |
| 24               | 6                | 0              | 1.865975                | -2.308762 | -0.079730 |
| 25               | 6                | 0              | 3.029786                | -2.825526 | -0.655782 |
| 26               | 6                | 0              | 1.941329                | -1.644020 | 1.145957  |
| 27               | 6                | 0              | 4.256311                | -2.654989 | -0.024952 |
| 28               | 1                | 0              | 2.964334                | -3.350962 | -1.603001 |
| 29               | 6                | 0              | 3.173649                | -1.473236 | 1.766678  |
| 30               | 1                | 0              | 1.039915                | -1.265299 | 1.612214  |
| 31               | 6                | 0              | 4.338263                | -1.968542 | 1.184630  |
| 32               | 1                | 0              | 5.152302                | -3.055675 | -0.485682 |
| 33               | 1                | 0              | 3.220583                | -0.948720 | 2.714802  |
| 34               | 1                | 0              | 5.296765                | -1.827412 | 1.670342  |
| 35               | 6                | 0              | 2.165123                | 1.514201  | -0.484408 |
| 36               | 6                | 0              | 3.000220                | 1.903236  | -1.539153 |
| 37               | 6                | 0              | 2.294204                | 2.150337  | 0.757706  |
| 38               | 6                | 0              | 3.910081                | 2.938892  | -1.369173 |
| 39               | 1                | 0              | 2.914701                | 1.388877  | -2.490319 |
| 40               | 6                | 0              | 3.216908                | 3.179363  | 0.923689  |
| 41               | 1                | 0              | 1.688551                | 1.819315  | 1.595051  |
| 42               | 6                | 0              | 4.023102                | 3.582867  | -0.137271 |
| 43               | 1                | 0              | 4.540680                | 3.239086  | -2.198739 |
| 44               | 1                | 0              | 3.313512                | 3.659067  | 1.891674  |
| 45               | 1                | 0              | 4.743700                | 4.381197  | -0.002762 |

## Structure 39f (C<sub>2</sub>H<sub>5</sub>OH)

Energy (Hartrees): -1034.93485757

No imaginary frequencies

Standard orientation:

| Center<br>Number | Atomic<br>Number | Atomic<br>Type | Coordinates (Angstroms) |           |           |
|------------------|------------------|----------------|-------------------------|-----------|-----------|
|                  |                  |                | X                       | Y         | Z         |
| 1                | 6                | 0              | -2.686806               | 0.508013  | 1.027093  |
| 2                | 6                | 0              | -4.016064               | 0.841567  | 1.227823  |
| 3                | 6                | 0              | -4.991684               | 0.414652  | 0.323508  |
| 4                | 6                | 0              | -4.616972               | -0.340859 | -0.785862 |
| 5                | 6                | 0              | -3.272060               | -0.656456 | -0.978992 |
| 6                | 6                | 0              | -2.284279               | -0.253376 | -0.080506 |
| 7                | 1                | 0              | -1.950381               | 0.832119  | 1.755287  |
| 8                | 1                | 0              | -4.319134               | 1.424637  | 2.090619  |
| 9                | 1                | 0              | -5.347535               | -0.678084 | -1.509666 |
| 10               | 1                | 0              | -2.995030               | -1.225051 | -1.861068 |
| 11               | 6                | 0              | -0.848357               | -0.611019 | -0.277479 |
| 12               | 6                | 0              | -0.548329               | -1.901735 | -0.602840 |
| 13               | 6                | 0              | 0.108704                | 0.480728  | -0.175441 |
| 14               | 1                | 0              | -1.384692               | -2.564935 | -0.806323 |
| 15               | 1                | 0              | -0.244586               | 1.387397  | 0.329898  |
| 16               | 1                | 0              | 0.589995                | -3.445801 | -1.191894 |
| 17               | 7                | 0              | 1.277579                | 0.442437  | -0.698868 |
| 18               | 7                | 0              | 0.649438                | -2.545074 | -0.734325 |
| 19               | 8                | 0              | -6.273145               | 0.783180  | 0.604450  |
| 20               | 6                | 0              | -7.296025               | 0.334275  | -0.275189 |
| 21               | 1                | 0              | -8.231300               | 0.710639  | 0.135079  |
| 22               | 1                | 0              | -7.153223               | 0.736915  | -1.281842 |
| 23               | 1                | 0              | -7.328004               | -0.758228 | -0.312892 |
| 24               | 6                | 0              | 1.874276                | -2.313375 | -0.080947 |
| 25               | 6                | 0              | 3.039880                | -2.815374 | -0.665381 |
| 26               | 6                | 0              | 1.948656                | -1.653612 | 1.147133  |
| 27               | 6                | 0              | 4.267669                | -2.635927 | -0.039335 |
| 28               | 1                | 0              | 2.975771                | -3.335808 | -1.615530 |
| 29               | 6                | 0              | 3.182014                | -1.473126 | 1.762809  |
| 30               | 1                | 0              | 1.045243                | -1.286390 | 1.619091  |
| 31               | 6                | 0              | 4.348460                | -1.954725 | 1.173127  |
| 32               | 1                | 0              | 5.165562                | -3.025132 | -0.506387 |
| 33               | 1                | 0              | 3.228632                | -0.952394 | 2.713135  |
| 34               | 1                | 0              | 5.307858                | -1.806634 | 1.655239  |
| 35               | 6                | 0              | 2.155549                | 1.518360  | -0.483850 |
| 36               | 6                | 0              | 2.986107                | 1.917441  | -1.538238 |
| 37               | 6                | 0              | 2.280694                | 2.152864  | 0.759386  |
| 38               | 6                | 0              | 3.886578                | 2.960972  | -1.367016 |
| 39               | 1                | 0              | 2.904846                | 1.404304  | -2.490467 |
| 40               | 6                | 0              | 3.193998                | 3.189925  | 0.926875  |
| 41               | 1                | 0              | 1.680078                | 1.814455  | 1.597448  |
| 42               | 6                | 0              | 3.995028                | 3.603505  | -0.133993 |
| 43               | 1                | 0              | 4.513754                | 3.268468  | -2.196644 |
| 44               | 1                | 0              | 3.287399                | 3.668130  | 1.896052  |
| 45               | 1                | 0              | 4.708550                | 4.408110  | 0.001495  |

## Structure 40a (vacuum)

Energy (Hartrees): -1263.94462840

No imaginary frequencies

Standard orientation:

| Center<br>Number | Atomic<br>Number | Atomic<br>Type | Coordinates (Angstroms) |           |           |
|------------------|------------------|----------------|-------------------------|-----------|-----------|
|                  |                  |                | X                       | Y         | Z         |
| 1                | 6                | 0              | -0.913066               | 3.447765  | -0.956980 |
| 2                | 6                | 0              | -0.952123               | 4.829695  | -0.978779 |
| 3                | 6                | 0              | -0.098633               | 5.570542  | -0.157284 |
| 4                | 6                | 0              | 0.783256                | 4.906025  | 0.690214  |
| 5                | 6                | 0              | 0.796856                | 3.511871  | 0.712248  |
| 6                | 6                | 0              | -0.033750               | 2.753616  | -0.111343 |
| 7                | 1                | 0              | -1.560413               | 2.890739  | -1.626064 |
| 8                | 1                | 0              | -1.626486               | 5.365040  | -1.636073 |
| 9                | 1                | 0              | 1.445036                | 5.451000  | 1.349885  |
| 10               | 1                | 0              | 1.457527                | 3.007979  | 1.409723  |
| 11               | 6                | 0              | 0.006469                | 1.271999  | -0.100074 |
| 12               | 6                | 0              | 1.216081                | 0.630681  | -0.074896 |
| 13               | 6                | 0              | -1.242107               | 0.545410  | -0.087296 |
| 14               | 1                | 0              | 2.123536                | 1.225597  | -0.090075 |
| 15               | 1                | 0              | -2.151073               | 1.158531  | -0.075342 |
| 16               | 1                | 0              | 0.522806                | -1.246284 | 0.028232  |
| 17               | 7                | 0              | -1.328234               | -0.740333 | -0.075801 |
| 18               | 7                | 0              | 1.388605                | -0.705265 | -0.023376 |
| 19               | 8                | 0              | -0.205053               | 6.923300  | -0.253366 |
| 20               | 6                | 0              | 0.643635                | 7.704093  | 0.559462  |
| 21               | 1                | 0              | 0.411666                | 8.741987  | 0.330614  |
| 22               | 1                | 0              | 0.457629                | 7.515749  | 1.621787  |
| 23               | 1                | 0              | 1.697187                | 7.508613  | 0.334673  |
| 24               | 6                | 0              | -2.600852               | -1.334686 | 0.032504  |
| 25               | 6                | 0              | -2.843540               | -2.520838 | -0.655683 |
| 26               | 6                | 0              | -3.622064               | -0.814638 | 0.841268  |
| 27               | 6                | 0              | -4.078974               | -3.158787 | -0.586750 |
| 28               | 1                | 0              | -2.051276               | -2.936329 | -1.267488 |
| 29               | 6                | 0              | -4.850231               | -1.445272 | 0.923375  |
| 30               | 1                | 0              | -3.436355               | 0.073372  | 1.434613  |
| 31               | 6                | 0              | -5.091295               | -2.617731 | 0.204194  |
| 32               | 1                | 0              | -4.232460               | -4.071457 | -1.146518 |
| 33               | 1                | 0              | -5.639749               | -1.057378 | 1.555361  |
| 34               | 6                | 0              | 2.623913                | -1.371108 | -0.054749 |
| 35               | 6                | 0              | 2.703367                | -2.666756 | 0.447868  |
| 36               | 6                | 0              | 3.777901                | -0.786406 | -0.589823 |
| 37               | 6                | 0              | 3.903728                | -3.371547 | 0.435250  |
| 38               | 1                | 0              | 1.815673                | -3.128171 | 0.866157  |
| 39               | 6                | 0              | 4.976943                | -1.475802 | -0.587166 |
| 40               | 1                | 0              | 3.737701                | 0.199721  | -1.035168 |
| 41               | 6                | 0              | 5.052782                | -2.772026 | -0.074860 |
| 42               | 1                | 0              | 3.925234                | -4.376515 | 0.834280  |
| 43               | 1                | 0              | 5.874638                | -1.033007 | -1.000776 |
| 44               | 8                | 0              | 6.276826                | -3.364066 | -0.126230 |
| 45               | 8                | 0              | -6.329249               | -3.163195 | 0.351635  |
| 46               | 6                | 0              | 6.384902                | -4.683109 | 0.363011  |
| 47               | 1                | 0              | 7.425262                | -4.971046 | 0.229499  |
| 48               | 1                | 0              | 6.127522                | -4.734213 | 1.426053  |
| 49               | 1                | 0              | 5.743102                | -5.367933 | -0.200911 |
| 50               | 6                | 0              | -6.602484               | -4.361362 | -0.341197 |
| 51               | 1                | 0              | -7.628364               | -4.626430 | -0.094666 |
| 52               | 1                | 0              | -6.513510               | -4.222825 | -1.423690 |
| 53               | 1                | 0              | -5.931917               | -5.165619 | -0.021275 |

## Structure 40a (CHCl<sub>3</sub>)

Energy (Hartrees): -1263.97784391

No imaginary frequencies

Standard orientation:

| Center<br>Number | Atomic<br>Number | Atomic<br>Type | Coordinates (Angstroms) |           |           |
|------------------|------------------|----------------|-------------------------|-----------|-----------|
|                  |                  |                | X                       | Y         | Z         |
| 1                | 6                | 0              | -0.926571               | 3.460182  | -0.922451 |
| 2                | 6                | 0              | -0.960814               | 4.843650  | -0.941959 |
| 3                | 6                | 0              | -0.077188               | 5.581349  | -0.148876 |
| 4                | 6                | 0              | 0.830701                | 4.911987  | 0.668640  |
| 5                | 6                | 0              | 0.840741                | 3.517469  | 0.688365  |
| 6                | 6                | 0              | -0.021231               | 2.761317  | -0.107536 |
| 7                | 1                | 0              | -1.601753               | 2.908966  | -1.568693 |
| 8                | 1                | 0              | -1.657995               | 5.377044  | -1.578024 |
| 9                | 1                | 0              | 1.516857                | 5.454806  | 1.305448  |
| 10               | 1                | 0              | 1.528954                | 3.013520  | 1.359146  |
| 11               | 6                | 0              | 0.012626                | 1.277617  | -0.099138 |
| 12               | 6                | 0              | 1.223360                | 0.631219  | -0.086704 |
| 13               | 6                | 0              | -1.239705               | 0.559521  | -0.079280 |
| 14               | 1                | 0              | 2.133766                | 1.221426  | -0.111360 |
| 15               | 1                | 0              | -2.144745               | 1.176471  | -0.048561 |
| 16               | 1                | 0              | 0.529780                | -1.249642 | 0.023318  |
| 17               | 7                | 0              | -1.333534               | -0.727663 | -0.085057 |
| 18               | 7                | 0              | 1.390914                | -0.703600 | -0.039309 |
| 19               | 8                | 0              | -0.178784               | 6.934021  | -0.239748 |
| 20               | 6                | 0              | 0.708516                | 7.714640  | 0.542936  |
| 21               | 1                | 0              | 0.476543                | 8.753661  | 0.316017  |
| 22               | 1                | 0              | 0.554536                | 7.534197  | 1.611091  |
| 23               | 1                | 0              | 1.751290                | 7.510705  | 0.281271  |
| 24               | 6                | 0              | -2.608191               | -1.318155 | 0.029669  |
| 25               | 6                | 0              | -2.856756               | -2.503744 | -0.660339 |
| 26               | 6                | 0              | -3.624575               | -0.798177 | 0.845594  |
| 27               | 6                | 0              | -4.092756               | -3.141406 | -0.586477 |
| 28               | 1                | 0              | -2.069902               | -2.922731 | -1.277973 |
| 29               | 6                | 0              | -4.853421               | -1.429385 | 0.933354  |
| 30               | 1                | 0              | -3.438214               | 0.091867  | 1.436359  |
| 31               | 6                | 0              | -5.100247               | -2.600803 | 0.212355  |
| 32               | 1                | 0              | -4.251424               | -4.053407 | -1.146787 |
| 33               | 1                | 0              | -5.636570               | -1.037172 | 1.572022  |
| 34               | 6                | 0              | 2.623015                | -1.379975 | -0.067584 |
| 35               | 6                | 0              | 2.682330                | -2.679057 | 0.431155  |
| 36               | 6                | 0              | 3.785393                | -0.805405 | -0.594874 |
| 37               | 6                | 0              | 3.874170                | -3.398854 | 0.423792  |
| 38               | 1                | 0              | 1.785642                | -3.131556 | 0.841356  |
| 39               | 6                | 0              | 4.975907                | -1.512181 | -0.590498 |
| 40               | 1                | 0              | 3.763793                | 0.186023  | -1.030256 |
| 41               | 6                | 0              | 5.032960                | -2.811812 | -0.081880 |
| 42               | 1                | 0              | 3.881461                | -4.405509 | 0.820117  |
| 43               | 1                | 0              | 5.878942                | -1.073568 | -0.999217 |
| 44               | 8                | 0              | 6.247535                | -3.421592 | -0.129786 |
| 45               | 8                | 0              | -6.336580               | -3.146492 | 0.362811  |
| 46               | 6                | 0              | 6.344489                | -4.732936 | 0.399243  |
| 47               | 1                | 0              | 7.382512                | -5.034507 | 0.271628  |
| 48               | 1                | 0              | 6.090988                | -4.748083 | 1.463720  |
| 49               | 1                | 0              | 5.697119                | -5.427743 | -0.144297 |
| 50               | 6                | 0              | -6.620775               | -4.335528 | -0.354276 |
| 51               | 1                | 0              | -7.650534               | -4.593848 | -0.113647 |
| 52               | 1                | 0              | -6.530722               | -4.176981 | -1.433219 |
| 53               | 1                | 0              | -5.961211               | -5.151810 | -0.044501 |

## Structure 40a (DMSO)

Energy (Hartrees): -1263.97347623

No imaginary frequencies

Standard orientation:

| Center<br>Number | Atomic<br>Number | Atomic<br>Type | Coordinates (Angstroms) |           |           |
|------------------|------------------|----------------|-------------------------|-----------|-----------|
|                  |                  |                | X                       | Y         | Z         |
| 1                | 6                | 0              | 0.944501                | 3.362085  | 0.933605  |
| 2                | 6                | 0              | 0.979991                | 4.746414  | 0.939657  |
| 3                | 6                | 0              | 0.094532                | 5.479082  | 0.143108  |
| 4                | 6                | 0              | -0.815195               | 4.801303  | -0.667233 |
| 5                | 6                | 0              | -0.826311               | 3.406709  | -0.674230 |
| 6                | 6                | 0              | 0.036285                | 2.656179  | 0.127574  |
| 7                | 1                | 0              | 1.622705                | 2.818665  | 1.583532  |
| 8                | 1                | 0              | 1.681352                | 5.281265  | 1.570166  |
| 9                | 1                | 0              | -1.504333               | 5.337455  | -1.306672 |
| 10               | 1                | 0              | -1.520294               | 2.899728  | -1.336966 |
| 11               | 6                | 0              | -0.001824               | 1.172506  | 0.138179  |
| 12               | 6                | 0              | -1.215587               | 0.529757  | 0.091468  |
| 13               | 6                | 0              | 1.248964                | 0.452371  | 0.175238  |
| 14               | 1                | 0              | -2.121761               | 1.125275  | 0.063417  |
| 15               | 1                | 0              | 2.157402                | 1.063888  | 0.148445  |
| 16               | 1                | 0              | -0.519955               | -1.353495 | 0.092611  |
| 17               | 7                | 0              | 1.335600                | -0.835087 | 0.224738  |
| 18               | 7                | 0              | -1.382507               | -0.805375 | 0.077678  |
| 19               | 8                | 0              | 0.193462                | 6.830712  | 0.222409  |
| 20               | 6                | 0              | -0.713540               | 7.600277  | -0.553474 |
| 21               | 1                | 0              | -0.490135               | 8.642705  | -0.333977 |
| 22               | 1                | 0              | -0.572156               | 7.416555  | -1.622530 |
| 23               | 1                | 0              | -1.750200               | 7.385100  | -0.278043 |
| 24               | 6                | 0              | 2.606014                | -1.441112 | 0.153700  |
| 25               | 6                | 0              | 2.811412                | -2.629407 | 0.869741  |
| 26               | 6                | 0              | 3.650448                | -0.954434 | -0.633996 |
| 27               | 6                | 0              | 4.030228                | -3.281773 | 0.830495  |
| 28               | 1                | 0              | 1.998939                | -3.027471 | 1.468238  |
| 29               | 6                | 0              | 4.880618                | -1.609783 | -0.687766 |
| 30               | 1                | 0              | 3.501712                | -0.067685 | -1.240448 |
| 31               | 6                | 0              | 5.077192                | -2.775464 | 0.051795  |
| 32               | 1                | 0              | 4.191065                | -4.195449 | 1.391559  |
| 33               | 1                | 0              | 5.662458                | -1.209115 | -1.319711 |
| 34               | 6                | 0              | -2.603503               | -1.499356 | 0.032532  |
| 35               | 6                | 0              | -2.554375               | -2.881604 | -0.194178 |
| 36               | 6                | 0              | -3.844297               | -0.892023 | 0.205787  |
| 37               | 6                | 0              | -3.715155               | -3.628809 | -0.260332 |
| 38               | 1                | 0              | -1.591101               | -3.364208 | -0.325483 |
| 39               | 6                | 0              | -5.018951               | -1.642126 | 0.130421  |
| 40               | 1                | 0              | -3.924942               | 0.168182  | 0.410453  |
| 41               | 6                | 0              | -4.961991               | -3.013884 | -0.105838 |
| 42               | 1                | 0              | -3.673825               | -4.697081 | -0.439349 |
| 43               | 1                | 0              | -5.966549               | -1.137400 | 0.266680  |
| 44               | 8                | 0              | -6.048322               | -3.824201 | -0.196980 |
| 45               | 8                | 0              | 6.231161                | -3.489985 | 0.064870  |
| 46               | 6                | 0              | -7.326203               | -3.218305 | -0.073545 |
| 47               | 1                | 0              | -8.053505               | -4.019165 | -0.192617 |
| 48               | 1                | 0              | -7.453026               | -2.758308 | 0.910984  |
| 49               | 1                | 0              | -7.483995               | -2.467060 | -0.853206 |
| 50               | 6                | 0              | 7.299042                | -3.025655 | -0.747351 |
| 51               | 1                | 0              | 8.113461                | -3.734341 | -0.609112 |
| 52               | 1                | 0              | 7.012026                | -3.004744 | -1.802773 |
| 53               | 1                | 0              | 7.628829                | -2.029950 | -0.436669 |



## Structure 40a (C<sub>2</sub>H<sub>5</sub>OH)

Energy (Hartrees): -1263.97716898

No imaginary frequencies

Standard orientation:

| Center<br>Number | Atomic<br>Number | Atomic<br>Type | Coordinates (Angstroms) |           |           |
|------------------|------------------|----------------|-------------------------|-----------|-----------|
|                  |                  |                | X                       | Y         | Z         |
| 1                | 6                | 0              | -0.930595               | 3.462867  | -0.904328 |
| 2                | 6                | 0              | -0.955990               | 4.847400  | -0.927916 |
| 3                | 6                | 0              | -0.049606               | 5.580666  | -0.157733 |
| 4                | 6                | 0              | 0.872083                | 4.909915  | 0.642814  |
| 5                | 6                | 0              | 0.873228                | 3.515549  | 0.667370  |
| 6                | 6                | 0              | -0.011064               | 2.762025  | -0.107419 |
| 7                | 1                | 0              | -1.624571               | 2.915045  | -1.533568 |
| 8                | 1                | 0              | -1.664654               | 5.381210  | -1.551542 |
| 9                | 1                | 0              | 1.577240                | 5.450163  | 1.260895  |
| 10               | 1                | 0              | 1.576000                | 3.010771  | 1.322484  |
| 11               | 6                | 0              | 0.017808                | 1.278025  | -0.099511 |
| 12               | 6                | 0              | 1.229844                | 0.632890  | -0.092321 |
| 13               | 6                | 0              | -1.237643               | 0.566631  | -0.076406 |
| 14               | 1                | 0              | 2.135310                | 1.229266  | -0.111384 |
| 15               | 1                | 0              | -2.138371               | 1.187875  | -0.023010 |
| 16               | 1                | 0              | 0.545147                | -1.256029 | -0.020458 |
| 17               | 7                | 0              | -1.338671               | -0.720588 | -0.103997 |
| 18               | 7                | 0              | 1.401740                | -0.701952 | -0.062191 |
| 19               | 8                | 0              | -0.142447               | 6.937597  | -0.251511 |
| 20               | 6                | 0              | 0.789509                | 7.713674  | 0.490784  |
| 21               | 1                | 0              | 0.563102                | 8.753725  | 0.263045  |
| 22               | 1                | 0              | 0.674249                | 7.542437  | 1.564671  |
| 23               | 1                | 0              | 1.815868                | 7.488409  | 0.187646  |
| 24               | 6                | 0              | -2.617640               | -1.300898 | 0.024083  |
| 25               | 6                | 0              | -2.889370               | -2.475875 | -0.676436 |
| 26               | 6                | 0              | -3.614787               | -0.781484 | 0.864022  |
| 27               | 6                | 0              | -4.129686               | -3.103743 | -0.589011 |
| 28               | 1                | 0              | -2.118685               | -2.897252 | -1.312985 |
| 29               | 6                | 0              | -4.848127               | -1.403203 | 0.965442  |
| 30               | 1                | 0              | -3.412228               | 0.099842  | 1.462775  |
| 31               | 6                | 0              | -5.117044               | -2.562850 | 0.233862  |
| 32               | 1                | 0              | -4.306406               | -4.006951 | -1.158380 |
| 33               | 1                | 0              | -5.615392               | -1.009191 | 1.622821  |
| 34               | 6                | 0              | 2.631946                | -1.382559 | -0.069914 |
| 35               | 6                | 0              | 2.632871                | -2.743009 | 0.232724  |
| 36               | 6                | 0              | 3.846885                | -0.759424 | -0.378627 |
| 37               | 6                | 0              | 3.815172                | -3.478186 | 0.245359  |
| 38               | 1                | 0              | 1.695406                | -3.236684 | 0.467505  |
| 39               | 6                | 0              | 5.026408                | -1.485516 | -0.356923 |
| 40               | 1                | 0              | 3.886297                | 0.288648  | -0.648140 |
| 41               | 6                | 0              | 5.022915                | -2.845919 | -0.043001 |
| 42               | 1                | 0              | 3.775025                | -4.532578 | 0.485686  |
| 43               | 1                | 0              | 5.969094                | -1.004613 | -0.593124 |
| 44               | 8                | 0              | 6.236313                | -3.468929 | -0.048927 |
| 45               | 8                | 0              | -6.358494               | -3.101765 | 0.398035  |
| 46               | 6                | 0              | 6.267752                | -4.846393 | 0.300706  |
| 47               | 1                | 0              | 7.314828                | -5.141713 | 0.267417  |
| 48               | 1                | 0              | 5.876954                | -5.002720 | 1.310167  |
| 49               | 1                | 0              | 5.697016                | -5.446239 | -0.413953 |
| 50               | 6                | 0              | -6.666665               | -4.277564 | -0.339246 |
| 51               | 1                | 0              | -7.695173               | -4.529400 | -0.086882 |
| 52               | 1                | 0              | -6.590692               | -4.096084 | -1.415029 |
| 53               | 1                | 0              | -6.009056               | -5.103499 | -0.054369 |

## Structure 40b (vacuum)

Energy (Hartrees): -1263.93724812

No imaginary frequencies

Standard orientation:

| Center<br>Number | Atomic<br>Number | Atomic<br>Type | Coordinates (Angstroms) |           |           |
|------------------|------------------|----------------|-------------------------|-----------|-----------|
|                  |                  |                | X                       | Y         | Z         |
| 1                | 6                | 0              | 0.365258                | 3.031955  | -0.768646 |
| 2                | 6                | 0              | 0.067501                | 4.393941  | -0.765302 |
| 3                | 6                | 0              | -0.874365               | 4.888594  | 0.134191  |
| 4                | 6                | 0              | -1.498227               | 4.015342  | 1.029560  |
| 5                | 6                | 0              | -1.183778               | 2.668720  | 1.019030  |
| 6                | 6                | 0              | -0.248643               | 2.143182  | 0.112109  |
| 7                | 1                | 0              | 1.088210                | 2.653279  | -1.483843 |
| 8                | 1                | 0              | 0.567822                | 5.046075  | -1.468390 |
| 9                | 1                | 0              | -2.212749               | 4.423509  | 1.734195  |
| 10               | 1                | 0              | -1.650103               | 2.006502  | 1.741490  |
| 11               | 6                | 0              | 0.095994                | 0.702315  | 0.102569  |
| 12               | 6                | 0              | -0.841475               | -0.278365 | 0.069038  |
| 13               | 6                | 0              | 1.505647                | 0.320853  | 0.098619  |
| 14               | 1                | 0              | 2.212727                | 1.135243  | 0.307460  |
| 15               | 1                | 0              | -0.503099               | -1.308787 | 0.087553  |
| 16               | 7                | 0              | 1.917474                | -0.866516 | -0.132240 |
| 17               | 7                | 0              | -2.184309               | -0.089352 | -0.041958 |
| 18               | 1                | 0              | -2.505136               | 0.847407  | -0.246607 |
| 19               | 8                | 0              | -1.245615               | 6.192445  | 0.219787  |
| 20               | 6                | 0              | -0.621365               | 7.110950  | -0.652259 |
| 21               | 1                | 0              | -0.829570               | 6.867386  | -1.699003 |
| 22               | 1                | 0              | -1.044194               | 8.085263  | -0.417587 |
| 23               | 1                | 0              | 0.461071                | 7.135494  | -0.491751 |
| 24               | 6                | 0              | -3.158470               | -1.098374 | 0.006162  |
| 25               | 6                | 0              | -4.402503               | -0.875654 | -0.576673 |
| 26               | 6                | 0              | -2.923010               | -2.322969 | 0.642579  |
| 27               | 6                | 0              | -5.398355               | -1.848098 | -0.541289 |
| 28               | 1                | 0              | -4.597020               | 0.067067  | -1.076901 |
| 29               | 6                | 0              | -3.903076               | -3.298479 | 0.662251  |
| 30               | 1                | 0              | -1.979680               | -2.508289 | 1.140596  |
| 31               | 6                | 0              | -5.147971               | -3.072607 | 0.072544  |
| 32               | 1                | 0              | -6.352135               | -1.637380 | -1.005503 |
| 33               | 1                | 0              | -3.730326               | -4.249443 | 1.151000  |
| 34               | 6                | 0              | 3.290063                | -1.144872 | -0.002266 |
| 35               | 6                | 0              | 4.100260                | -0.594289 | 1.001845  |
| 36               | 6                | 0              | 3.866170                | -2.049682 | -0.891667 |
| 37               | 6                | 0              | 5.444863                | -0.912051 | 1.080577  |
| 38               | 1                | 0              | 3.662121                | 0.063120  | 1.744319  |
| 39               | 6                | 0              | 5.220031                | -2.365795 | -0.829727 |
| 40               | 1                | 0              | 3.234426                | -2.497802 | -1.649411 |
| 41               | 6                | 0              | 6.017123                | -1.791490 | 0.159548  |
| 42               | 1                | 0              | 6.075627                | -0.501663 | 1.859784  |
| 43               | 1                | 0              | 5.632085                | -3.062281 | -1.547666 |
| 44               | 8                | 0              | 7.347137                | -2.037800 | 0.318168  |
| 45               | 8                | 0              | -6.043593               | -4.093964 | 0.155787  |
| 46               | 6                | 0              | 7.955089                | -2.943146 | -0.576186 |
| 47               | 1                | 0              | 7.882960                | -2.588984 | -1.609701 |
| 48               | 1                | 0              | 9.002229                | -2.998191 | -0.286154 |
| 49               | 1                | 0              | 7.504110                | -3.938089 | -0.500533 |
| 50               | 6                | 0              | -7.318859               | -3.890795 | -0.412208 |
| 51               | 1                | 0              | -7.248596               | -3.708073 | -1.489543 |
| 52               | 1                | 0              | -7.877215               | -4.807758 | -0.237378 |
| 53               | 1                | 0              | -7.836576               | -3.053089 | 0.066639  |

## Structure 40b (CHCl<sub>3</sub>)

Energy (Hartrees): -1263.97236584

No imaginary frequencies

Standard orientation:

| Center<br>Number | Atomic<br>Number | Atomic<br>Type | Coordinates (Angstroms) |           |           |
|------------------|------------------|----------------|-------------------------|-----------|-----------|
|                  |                  |                | X                       | Y         | Z         |
| 1                | 6                | 0              | 0.465386                | 3.030903  | -0.713488 |
| 2                | 6                | 0              | 0.200432                | 4.400044  | -0.713850 |
| 3                | 6                | 0              | -0.788370               | 4.908054  | 0.126867  |
| 4                | 6                | 0              | -1.490877               | 4.039214  | 0.968381  |
| 5                | 6                | 0              | -1.208621               | 2.684759  | 0.962855  |
| 6                | 6                | 0              | -0.226942               | 2.145514  | 0.114152  |
| 7                | 1                | 0              | 1.226803                | 2.647448  | -1.385243 |
| 8                | 1                | 0              | 0.762343                | 5.047657  | -1.373851 |
| 9                | 1                | 0              | -2.243689               | 4.451376  | 1.630452  |
| 10               | 1                | 0              | -1.742715               | 2.031910  | 1.645881  |
| 11               | 6                | 0              | 0.090315                | 0.697012  | 0.110028  |
| 12               | 6                | 0              | -0.862606               | -0.275345 | 0.073072  |
| 13               | 6                | 0              | 1.491222                | 0.296552  | 0.116059  |
| 14               | 1                | 0              | 2.204768                | 1.091495  | 0.366522  |
| 15               | 1                | 0              | -0.543019               | -1.310768 | 0.122092  |
| 16               | 7                | 0              | 1.899526                | -0.887039 | -0.158815 |
| 17               | 7                | 0              | -2.196244               | -0.077638 | -0.062853 |
| 18               | 1                | 0              | -2.515642               | 0.855975  | -0.291190 |
| 19               | 8                | 0              | -1.133231               | 6.218862  | 0.202167  |
| 20               | 6                | 0              | -0.435694               | 7.133881  | -0.627028 |
| 21               | 1                | 0              | -0.589818               | 6.904047  | -1.685473 |
| 22               | 1                | 0              | -0.851382               | 8.115440  | -0.407951 |
| 23               | 1                | 0              | 0.634498                | 7.135025  | -0.401201 |
| 24               | 6                | 0              | -3.182498               | -1.076009 | -0.002513 |
| 25               | 6                | 0              | -4.418604               | -0.842659 | -0.600374 |
| 26               | 6                | 0              | -2.970160               | -2.291004 | 0.659660  |
| 27               | 6                | 0              | -5.431312               | -1.797399 | -0.554375 |
| 28               | 1                | 0              | -4.592463               | 0.096682  | -1.115182 |
| 29               | 6                | 0              | -3.968912               | -3.249187 | 0.692077  |
| 30               | 1                | 0              | -2.033163               | -2.485491 | 1.167060  |
| 31               | 6                | 0              | -5.205462               | -3.014466 | 0.086424  |
| 32               | 1                | 0              | -6.378129               | -1.579723 | -1.030502 |
| 33               | 1                | 0              | -3.810613               | -4.191641 | 1.203269  |
| 34               | 6                | 0              | 3.268418                | -1.182781 | -0.013448 |
| 35               | 6                | 0              | 4.073657                | -0.655683 | 1.008598  |
| 36               | 6                | 0              | 3.847126                | -2.080393 | -0.910701 |
| 37               | 6                | 0              | 5.415303                | -0.988117 | 1.095957  |
| 38               | 1                | 0              | 3.636798                | -0.002230 | 1.755572  |
| 39               | 6                | 0              | 5.197232                | -2.413046 | -0.838486 |
| 40               | 1                | 0              | 3.224996                | -2.512530 | -1.686627 |
| 41               | 6                | 0              | 5.989856                | -1.860748 | 0.167917  |
| 42               | 1                | 0              | 6.037182                | -0.590789 | 1.890114  |
| 43               | 1                | 0              | 5.611513                | -3.102482 | -1.562211 |
| 44               | 8                | 0              | 7.314249                | -2.123735 | 0.333212  |
| 45               | 8                | 0              | -6.118849               | -4.018278 | 0.179751  |
| 46               | 6                | 0              | 7.925498                | -3.019098 | -0.579495 |
| 47               | 1                | 0              | 7.872479                | -2.637926 | -1.603704 |
| 48               | 1                | 0              | 8.968452                | -3.092032 | -0.277005 |
| 49               | 1                | 0              | 7.464363                | -4.010027 | -0.530686 |
| 50               | 6                | 0              | -7.379836               | -3.817675 | -0.434846 |
| 51               | 1                | 0              | -7.274120               | -3.660227 | -1.512482 |
| 52               | 1                | 0              | -7.949764               | -4.728036 | -0.259063 |
| 53               | 1                | 0              | -7.907313               | -2.969134 | 0.011413  |

## Structure 40b (DMSO)

Energy (Hartrees): -1263.96880145  
No imaginary frequencies

Standard orientation:

| Center<br>Number | Atomic<br>Number | Atomic<br>Type | Coordinates (Angstroms) |           |           |
|------------------|------------------|----------------|-------------------------|-----------|-----------|
|                  |                  |                | X                       | Y         | Z         |
| 1                | 6                | 0              | 0.494893                | 3.021578  | -0.702985 |
| 2                | 6                | 0              | 0.251017                | 4.394458  | -0.717363 |
| 3                | 6                | 0              | -0.733683               | 4.925886  | 0.114878  |
| 4                | 6                | 0              | -1.452855               | 4.074080  | 0.960399  |
| 5                | 6                | 0              | -1.191984               | 2.714740  | 0.968026  |
| 6                | 6                | 0              | -0.214216               | 2.153553  | 0.129466  |
| 7                | 1                | 0              | 1.253548                | 2.622482  | -1.368958 |
| 8                | 1                | 0              | 0.826843                | 5.026331  | -1.380708 |
| 9                | 1                | 0              | -2.205141               | 4.499378  | 1.615094  |
| 10               | 1                | 0              | -1.744166               | 2.078718  | 1.652648  |
| 11               | 6                | 0              | 0.084999                | 0.701142  | 0.139372  |
| 12               | 6                | 0              | -0.879004               | -0.263992 | 0.121073  |
| 13               | 6                | 0              | 1.480862                | 0.287993  | 0.138326  |
| 14               | 1                | 0              | 2.204281                | 1.078800  | 0.372015  |
| 15               | 1                | 0              | -0.566911               | -1.301370 | 0.181732  |
| 16               | 7                | 0              | 1.879174                | -0.903092 | -0.128158 |
| 17               | 7                | 0              | -2.209762               | -0.059706 | -0.005271 |
| 18               | 1                | 0              | -2.531416               | 0.874955  | -0.230866 |
| 19               | 8                | 0              | -1.056857               | 6.241126  | 0.174639  |
| 20               | 6                | 0              | -0.349899               | 7.130530  | -0.678418 |
| 21               | 1                | 0              | -0.512044               | 6.879928  | -1.730889 |
| 22               | 1                | 0              | -0.751783               | 8.122249  | -0.479574 |
| 23               | 1                | 0              | 0.721385                | 7.121820  | -0.458359 |
| 24               | 6                | 0              | -3.198381               | -1.058140 | 0.037076  |
| 25               | 6                | 0              | -4.437935               | -0.802717 | -0.545407 |
| 26               | 6                | 0              | -2.984280               | -2.293698 | 0.659282  |
| 27               | 6                | 0              | -5.450151               | -1.758898 | -0.529667 |
| 28               | 1                | 0              | -4.613267               | 0.155043  | -1.024953 |
| 29               | 6                | 0              | -3.983683               | -3.252799 | 0.662279  |
| 30               | 1                | 0              | -2.045805               | -2.506983 | 1.156342  |
| 31               | 6                | 0              | -5.222425               | -2.998312 | 0.067946  |
| 32               | 1                | 0              | -6.399031               | -1.524594 | -0.993825 |
| 33               | 1                | 0              | -3.820541               | -4.211305 | 1.141882  |
| 34               | 6                | 0              | 3.248979                | -1.204641 | 0.004950  |
| 35               | 6                | 0              | 4.072140                | -0.665335 | 1.006246  |
| 36               | 6                | 0              | 3.810363                | -2.121361 | -0.885045 |
| 37               | 6                | 0              | 5.413084                | -1.005404 | 1.079706  |
| 38               | 1                | 0              | 3.652949                | 0.007521  | 1.746396  |
| 39               | 6                | 0              | 5.159347                | -2.462259 | -0.826879 |
| 40               | 1                | 0              | 3.177106                | -2.563909 | -1.646570 |
| 41               | 6                | 0              | 5.970919                | -1.897281 | 0.158027  |
| 42               | 1                | 0              | 6.046571                | -0.594837 | 1.858128  |
| 43               | 1                | 0              | 5.557621                | -3.166851 | -1.545374 |
| 44               | 8                | 0              | 7.294167                | -2.163880 | 0.306277  |
| 45               | 8                | 0              | -6.135904               | -4.002361 | 0.127716  |
| 46               | 6                | 0              | 7.887466                | -3.069198 | -0.612926 |
| 47               | 1                | 0              | 7.806631                | -2.699760 | -1.639360 |
| 48               | 1                | 0              | 8.938192                | -3.134491 | -0.336521 |
| 49               | 1                | 0              | 7.431376                | -4.060895 | -0.540846 |
| 50               | 6                | 0              | -7.398581               | -3.775187 | -0.480129 |
| 51               | 1                | 0              | -7.291987               | -3.574468 | -1.550367 |
| 52               | 1                | 0              | -7.969170               | -4.691597 | -0.340777 |
| 53               | 1                | 0              | -7.924314               | -2.944069 | -0.000738 |

## Structure 40b (C<sub>2</sub>H<sub>5</sub>OH)

Energy (Hartrees): -1263.97270505

No imaginary frequencies

Standard orientation:

| Center<br>Number | Atomic<br>Number | Atomic<br>Type | Coordinates (Angstroms) |           |           |
|------------------|------------------|----------------|-------------------------|-----------|-----------|
|                  |                  |                | X                       | Y         | Z         |
| 1                | 6                | 0              | 0.463863                | 3.013159  | -0.724160 |
| 2                | 6                | 0              | 0.208905                | 4.384112  | -0.734899 |
| 3                | 6                | 0              | -0.758753               | 4.906674  | 0.120984  |
| 4                | 6                | 0              | -1.449885               | 4.054002  | 0.986940  |
| 5                | 6                | 0              | -1.178169               | 2.696611  | 0.990333  |
| 6                | 6                | 0              | -0.217926               | 2.142448  | 0.127739  |
| 7                | 1                | 0              | 1.208540                | 2.617425  | -1.407924 |
| 8                | 1                | 0              | 0.762128                | 5.019950  | -1.413508 |
| 9                | 1                | 0              | -2.187570               | 4.476263  | 1.660378  |
| 10               | 1                | 0              | -1.705949               | 2.056256  | 1.690086  |
| 11               | 6                | 0              | 0.089025                | 0.691354  | 0.132223  |
| 12               | 6                | 0              | -0.873056               | -0.274967 | 0.113171  |
| 13               | 6                | 0              | 1.486401                | 0.285286  | 0.126990  |
| 14               | 1                | 0              | 2.205700                | 1.079573  | 0.361549  |
| 15               | 1                | 0              | -0.561274               | -1.312694 | 0.167704  |
| 16               | 7                | 0              | 1.891337                | -0.902881 | -0.143196 |
| 17               | 7                | 0              | -2.204589               | -0.069705 | -0.009966 |
| 18               | 1                | 0              | -2.525784               | 0.866789  | -0.228077 |
| 19               | 8                | 0              | -1.092618               | 6.224725  | 0.186437  |
| 20               | 6                | 0              | -0.405241               | 7.124086  | -0.674783 |
| 21               | 1                | 0              | -0.585468               | 6.876229  | -1.724594 |
| 22               | 1                | 0              | -0.811051               | 8.111399  | -0.462039 |
| 23               | 1                | 0              | 0.668722                | 7.119107  | -0.470027 |
| 24               | 6                | 0              | -3.193772               | -1.067615 | 0.032509  |
| 25               | 6                | 0              | -4.433084               | -0.810792 | -0.550087 |
| 26               | 6                | 0              | -2.980686               | -2.302037 | 0.656669  |
| 27               | 6                | 0              | -5.447006               | -1.764784 | -0.531905 |
| 28               | 1                | 0              | -4.607016               | 0.146134  | -1.031893 |
| 29               | 6                | 0              | -3.982074               | -3.259300 | 0.662584  |
| 30               | 1                | 0              | -2.042418               | -2.515501 | 1.154142  |
| 31               | 6                | 0              | -5.219156               | -3.001334 | 0.069008  |
| 32               | 1                | 0              | -6.395964               | -1.530569 | -0.995952 |
| 33               | 1                | 0              | -3.822293               | -4.217612 | 1.144292  |
| 34               | 6                | 0              | 3.263308                | -1.194310 | -0.007439 |
| 35               | 6                | 0              | 4.074125                | -0.659704 | 1.005777  |
| 36               | 6                | 0              | 3.837726                | -2.096912 | -0.903472 |
| 37               | 6                | 0              | 5.417203                | -0.990568 | 1.086109  |
| 38               | 1                | 0              | 3.643625                | 0.000671  | 1.750685  |
| 39               | 6                | 0              | 5.188517                | -2.428855 | -0.838220 |
| 40               | 1                | 0              | 3.214014                | -2.536179 | -1.674699 |
| 41               | 6                | 0              | 5.985505                | -1.868539 | 0.159496  |
| 42               | 1                | 0              | 6.042826                | -0.584931 | 1.873752  |
| 43               | 1                | 0              | 5.598110                | -3.123294 | -1.560249 |
| 44               | 8                | 0              | 7.314817                | -2.129612 | 0.317051  |
| 45               | 8                | 0              | -6.139020               | -4.006771 | 0.133774  |
| 46               | 6                | 0              | 7.920593                | -3.037390 | -0.594070 |
| 47               | 1                | 0              | 7.853179                | -2.666691 | -1.620600 |
| 48               | 1                | 0              | 8.966970                | -3.101801 | -0.301190 |
| 49               | 1                | 0              | 7.460795                | -4.027235 | -0.524530 |
| 50               | 6                | 0              | -7.405176               | -3.778867 | -0.470861 |
| 51               | 1                | 0              | -7.299126               | -3.583965 | -1.541819 |
| 52               | 1                | 0              | -7.975983               | -4.694078 | -0.324204 |
| 53               | 1                | 0              | -7.924505               | -2.944424 | 0.008933  |

## Structure 40c (vacuum)

Energy (Hartrees): -1263.93862770  
No imaginary frequencies

Standard orientation:

| Center<br>Number | Atomic<br>Number | Atomic<br>Type | Coordinates (Angstroms) |           |           |
|------------------|------------------|----------------|-------------------------|-----------|-----------|
|                  |                  |                | X                       | Y         | Z         |
| 1                | 6                | 0              | 0.756656                | 2.436935  | -0.775180 |
| 2                | 6                | 0              | 0.735976                | 3.829057  | -0.756932 |
| 3                | 6                | 0              | -0.051841               | 4.495889  | 0.179709  |
| 4                | 6                | 0              | -0.805312               | 3.760380  | 1.096834  |
| 5                | 6                | 0              | -0.772775               | 2.377025  | 1.066556  |
| 6                | 6                | 0              | 0.000478                | 1.686219  | 0.122561  |
| 7                | 1                | 0              | 1.385945                | 1.925467  | -1.492303 |
| 8                | 1                | 0              | 1.338891                | 4.373995  | -1.470529 |
| 9                | 1                | 0              | -1.393668               | 4.296911  | 1.831038  |
| 10               | 1                | 0              | -1.339350               | 1.816021  | 1.803045  |
| 11               | 6                | 0              | 0.014883                | 0.203970  | 0.093538  |
| 12               | 6                | 0              | -1.128054               | -0.528844 | 0.066841  |
| 13               | 6                | 0              | 1.264014                | -0.538941 | 0.052680  |
| 14               | 1                | 0              | -1.064918               | -1.612376 | 0.065747  |
| 15               | 1                | 0              | 1.155974                | -1.633452 | 0.052366  |
| 16               | 7                | 0              | 2.416247                | 0.008800  | 0.033216  |
| 17               | 7                | 0              | -2.394277               | -0.031044 | -0.011695 |
| 18               | 1                | 0              | -2.488607               | 0.959733  | -0.190422 |
| 19               | 8                | 0              | -0.144982               | 5.847924  | 0.282952  |
| 20               | 6                | 0              | 0.622891                | 6.628034  | -0.608684 |
| 21               | 1                | 0              | 0.340266                | 6.435347  | -1.648602 |
| 22               | 1                | 0              | 0.409440                | 7.665956  | -0.362693 |
| 23               | 1                | 0              | 1.692796                | 6.435543  | -0.480933 |
| 24               | 6                | 0              | -3.570920               | -0.794442 | 0.031738  |
| 25               | 6                | 0              | -4.725417               | -0.315380 | -0.580012 |
| 26               | 6                | 0              | -3.624642               | -2.023905 | 0.698958  |
| 27               | 6                | 0              | -5.913457               | -1.040809 | -0.541983 |
| 28               | 1                | 0              | -4.697308               | 0.633634  | -1.104419 |
| 29               | 6                | 0              | -4.797010               | -2.757920 | 0.719929  |
| 30               | 1                | 0              | -2.755793               | -2.397039 | 1.226938  |
| 31               | 6                | 0              | -5.951089               | -2.275631 | 0.100775  |
| 32               | 1                | 0              | -6.789860               | -0.633300 | -1.027047 |
| 33               | 1                | 0              | -4.848097               | -3.709751 | 1.234144  |
| 34               | 6                | 0              | 3.553297                | -0.815334 | -0.057525 |
| 35               | 6                | 0              | 4.694413                | -0.450537 | 0.653299  |
| 36               | 6                | 0              | 3.614242                | -1.958279 | -0.868858 |
| 37               | 6                | 0              | 5.853161                | -1.220587 | 0.608167  |
| 38               | 1                | 0              | 4.658377                | 0.447448  | 1.258644  |
| 39               | 6                | 0              | 4.766075                | -2.722645 | -0.932327 |
| 40               | 1                | 0              | 2.760439                | -2.228398 | -1.480340 |
| 41               | 6                | 0              | 5.890711                | -2.365828 | -0.186166 |
| 42               | 1                | 0              | 6.713622                | -0.912306 | 1.186937  |
| 43               | 1                | 0              | 4.824884                | -3.598657 | -1.566976 |
| 44               | 8                | 0              | -7.052130               | -3.070349 | 0.185943  |
| 45               | 8                | 0              | 6.973875                | -3.182248 | -0.311414 |
| 46               | 6                | 0              | -8.231926               | -2.619664 | -0.443222 |
| 47               | 1                | 0              | -8.080524               | -2.488765 | -1.519738 |
| 48               | 1                | 0              | -8.979199               | -3.391916 | -0.275298 |
| 49               | 1                | 0              | -8.579795               | -1.677416 | -0.007093 |
| 50               | 6                | 0              | 8.140838                | -2.830276 | 0.398059  |
| 51               | 1                | 0              | 7.960605                | -2.818046 | 1.477915  |
| 52               | 1                | 0              | 8.879461                | -3.594407 | 0.165215  |
| 53               | 1                | 0              | 8.517370                | -1.852065 | 0.081379  |

## Structure 40c (CHCl<sub>3</sub>)

Energy (Hartrees): -1263.97496700

No imaginary frequencies

Standard orientation:

| Center<br>Number | Atomic<br>Number | Atomic<br>Type | Coordinates (Angstroms) |           |           |
|------------------|------------------|----------------|-------------------------|-----------|-----------|
|                  |                  |                | X                       | Y         | Z         |
| 1                | 6                | 0              | 0.653121                | 2.450716  | -0.847299 |
| 2                | 6                | 0              | 0.614203                | 3.842766  | -0.814808 |
| 3                | 6                | 0              | -0.099475               | 4.488317  | 0.195233  |
| 4                | 6                | 0              | -0.759905               | 3.731200  | 1.166448  |
| 5                | 6                | 0              | -0.709378               | 2.347636  | 1.120018  |
| 6                | 6                | 0              | -0.007465               | 1.678306  | 0.107035  |
| 7                | 1                | 0              | 1.215795                | 1.958181  | -1.632086 |
| 8                | 1                | 0              | 1.141859                | 4.404128  | -1.574404 |
| 9                | 1                | 0              | -1.296424               | 4.246777  | 1.954881  |
| 10               | 1                | 0              | -1.212209               | 1.772720  | 1.891699  |
| 11               | 6                | 0              | 0.025920                | 0.194997  | 0.058472  |
| 12               | 6                | 0              | -1.111673               | -0.554955 | 0.046310  |
| 13               | 6                | 0              | 1.278828                | -0.530776 | 0.011496  |
| 14               | 1                | 0              | -1.030711               | -1.637287 | 0.036551  |
| 15               | 1                | 0              | 1.182004                | -1.623423 | -0.040623 |
| 16               | 7                | 0              | 2.431212                | 0.027092  | 0.050875  |
| 17               | 7                | 0              | -2.378195               | -0.071717 | 0.010585  |
| 18               | 1                | 0              | -2.496499               | 0.925489  | -0.122773 |
| 19               | 8                | 0              | -0.204083               | 5.836876  | 0.316012  |
| 20               | 6                | 0              | 0.465126                | 6.639672  | -0.642761 |
| 21               | 1                | 0              | 0.083217                | 6.452028  | -1.650902 |
| 22               | 1                | 0              | 0.258637                | 7.672281  | -0.367478 |
| 23               | 1                | 0              | 1.544867                | 6.465991  | -0.618813 |
| 24               | 6                | 0              | -3.552033               | -0.843523 | 0.045438  |
| 25               | 6                | 0              | -4.728679               | -0.307718 | -0.472497 |
| 26               | 6                | 0              | -3.583028               | -2.126626 | 0.603932  |
| 27               | 6                | 0              | -5.918384               | -1.030800 | -0.451820 |
| 28               | 1                | 0              | -4.715386               | 0.687325  | -0.904862 |
| 29               | 6                | 0              | -4.760555               | -2.855786 | 0.609267  |
| 30               | 1                | 0              | -2.696052               | -2.553789 | 1.055685  |
| 31               | 6                | 0              | -5.936617               | -2.318208 | 0.081640  |
| 32               | 1                | 0              | -6.812119               | -0.581075 | -0.863198 |
| 33               | 1                | 0              | -4.790747               | -3.849798 | 1.040276  |
| 34               | 6                | 0              | 3.576581                | -0.786857 | -0.048735 |
| 35               | 6                | 0              | 4.705739                | -0.437626 | 0.691817  |
| 36               | 6                | 0              | 3.659604                | -1.903610 | -0.895273 |
| 37               | 6                | 0              | 5.872834                | -1.195818 | 0.639654  |
| 38               | 1                | 0              | 4.658853                | 0.439032  | 1.328331  |
| 39               | 6                | 0              | 4.819657                | -2.657085 | -0.964258 |
| 40               | 1                | 0              | 2.816111                | -2.166123 | -1.524457 |
| 41               | 6                | 0              | 5.931823                | -2.315091 | -0.190587 |
| 42               | 1                | 0              | 6.723035                | -0.899787 | 1.240193  |
| 43               | 1                | 0              | 4.889552                | -3.512460 | -1.626703 |
| 44               | 8                | 0              | -7.039603               | -3.112190 | 0.139320  |
| 45               | 8                | 0              | 7.023788                | -3.116611 | -0.323338 |
| 46               | 6                | 0              | -8.249987               | -2.589584 | -0.380968 |
| 47               | 1                | 0              | -8.154283               | -2.357374 | -1.446155 |
| 48               | 1                | 0              | -8.997487               | -3.369622 | -0.248831 |
| 49               | 1                | 0              | -8.561457               | -1.693982 | 0.165495  |
| 50               | 6                | 0              | 8.177591                | -2.783843 | 0.428927  |
| 51               | 1                | 0              | 7.972570                | -2.814844 | 1.503367  |
| 52               | 1                | 0              | 8.925125                | -3.536212 | 0.183905  |
| 53               | 1                | 0              | 8.556715                | -1.794637 | 0.154638  |

## Structure 40c (DMSO)

Energy (Hartrees): -1263.97276969

No imaginary frequencies

Standard orientation:

| Center<br>Number | Atomic<br>Number | Atomic<br>Type | Coordinates (Angstroms) |           |           |
|------------------|------------------|----------------|-------------------------|-----------|-----------|
|                  |                  |                | X                       | Y         | Z         |
| 1                | 6                | 0              | 0.637905                | 2.452786  | -0.863280 |
| 2                | 6                | 0              | 0.614143                | 3.845567  | -0.834261 |
| 3                | 6                | 0              | -0.071300               | 4.500988  | 0.190463  |
| 4                | 6                | 0              | -0.722135               | 3.750595  | 1.174410  |
| 5                | 6                | 0              | -0.686253               | 2.366050  | 1.131000  |
| 6                | 6                | 0              | -0.007453               | 1.687771  | 0.108167  |
| 7                | 1                | 0              | 1.172499                | 1.954174  | -1.664423 |
| 8                | 1                | 0              | 1.127449                | 4.399003  | -1.609604 |
| 9                | 1                | 0              | -1.244387               | 4.269942  | 1.970121  |
| 10               | 1                | 0              | -1.185802               | 1.799630  | 1.911144  |
| 11               | 6                | 0              | 0.021620                | 0.204127  | 0.065064  |
| 12               | 6                | 0              | -1.117265               | -0.548663 | 0.062656  |
| 13               | 6                | 0              | 1.269206                | -0.524699 | 0.017413  |
| 14               | 1                | 0              | -1.029396               | -1.630282 | 0.051992  |
| 15               | 1                | 0              | 1.167320                | -1.616015 | -0.034434 |
| 16               | 7                | 0              | 2.427378                | 0.028479  | 0.058184  |
| 17               | 7                | 0              | -2.381338               | -0.069090 | 0.041690  |
| 18               | 1                | 0              | -2.508815               | 0.930173  | -0.075052 |
| 19               | 8                | 0              | -0.156531               | 5.848620  | 0.310833  |
| 20               | 6                | 0              | 0.507395                | 6.639223  | -0.665329 |
| 21               | 1                | 0              | 0.103045                | 6.454458  | -1.664803 |
| 22               | 1                | 0              | 0.323114                | 7.675886  | -0.389832 |
| 23               | 1                | 0              | 1.584167                | 6.447472  | -0.662253 |
| 24               | 6                | 0              | -3.554295               | -0.845046 | 0.061053  |
| 25               | 6                | 0              | -4.738353               | -0.284296 | -0.412432 |
| 26               | 6                | 0              | -3.576972               | -2.153532 | 0.557552  |
| 27               | 6                | 0              | -5.928759               | -1.006986 | -0.408771 |
| 28               | 1                | 0              | -4.730698               | 0.731348  | -0.794254 |
| 29               | 6                | 0              | -4.756547               | -2.880238 | 0.548499  |
| 30               | 1                | 0              | -2.683772               | -2.606755 | 0.970033  |
| 31               | 6                | 0              | -5.941283               | -2.318166 | 0.066019  |
| 32               | 1                | 0              | -6.827373               | -0.536508 | -0.785350 |
| 33               | 1                | 0              | -4.776806               | -3.893714 | 0.932474  |
| 34               | 6                | 0              | 3.567529                | -0.794136 | -0.042333 |
| 35               | 6                | 0              | 4.707962                | -0.441286 | 0.680045  |
| 36               | 6                | 0              | 3.635853                | -1.924498 | -0.873172 |
| 37               | 6                | 0              | 5.872085                | -1.204699 | 0.624882  |
| 38               | 1                | 0              | 4.677049                | 0.443496  | 1.306977  |
| 39               | 6                | 0              | 4.791841                | -2.684486 | -0.943600 |
| 40               | 1                | 0              | 2.784546                | -2.195624 | -1.488210 |
| 41               | 6                | 0              | 5.916541                | -2.337749 | -0.188440 |
| 42               | 1                | 0              | 6.729849                | -0.902680 | 1.211786  |
| 43               | 1                | 0              | 4.844573                | -3.550970 | -1.593447 |
| 44               | 8                | 0              | -7.043823               | -3.111029 | 0.104774  |
| 45               | 8                | 0              | 7.001489                | -3.144984 | -0.319779 |
| 46               | 6                | 0              | -8.261826               | -2.556618 | -0.369195 |
| 47               | 1                | 0              | -8.186029               | -2.280490 | -1.425113 |
| 48               | 1                | 0              | -9.014333               | -3.334477 | -0.253890 |
| 49               | 1                | 0              | -8.553310               | -1.681168 | 0.218480  |
| 50               | 6                | 0              | 8.165703                | -2.800092 | 0.415667  |
| 51               | 1                | 0              | 7.971041                | -2.808812 | 1.492064  |
| 52               | 1                | 0              | 8.908903                | -3.558995 | 0.178427  |
| 53               | 1                | 0              | 8.543751                | -1.817171 | 0.118975  |



## Structure 40c (C<sub>2</sub>H<sub>5</sub>OH)

Energy (Hartrees): -1263.97643639

No imaginary frequencies

Standard orientation:

| Center<br>Number | Atomic<br>Number | Atomic<br>Type | Coordinates (Angstroms) |           |           |
|------------------|------------------|----------------|-------------------------|-----------|-----------|
|                  |                  |                | X                       | Y         | Z         |
| 1                | 6                | 0              | 0.608528                | 2.456722  | -0.877360 |
| 2                | 6                | 0              | 0.573988                | 3.849210  | -0.844670 |
| 3                | 6                | 0              | -0.096793               | 4.493595  | 0.195009  |
| 4                | 6                | 0              | -0.721162               | 3.738631  | 1.190908  |
| 5                | 6                | 0              | -0.674377               | 2.354360  | 1.143841  |
| 6                | 6                | 0              | -0.011000               | 1.685060  | 0.105502  |
| 7                | 1                | 0              | 1.130466                | 1.963804  | -1.690384 |
| 8                | 1                | 0              | 1.067592                | 4.409955  | -1.627614 |
| 9                | 1                | 0              | -1.231053               | 4.253419  | 1.997862  |
| 10               | 1                | 0              | -1.152988               | 1.781755  | 1.932560  |
| 11               | 6                | 0              | 0.027215                | 0.201456  | 0.057727  |
| 12               | 6                | 0              | -1.108242               | -0.555283 | 0.051250  |
| 13               | 6                | 0              | 1.279028                | -0.519792 | 0.010905  |
| 14               | 1                | 0              | -1.018157               | -1.636721 | 0.037154  |
| 15               | 1                | 0              | 1.183938                | -1.611470 | -0.045400 |
| 16               | 7                | 0              | 2.433932                | 0.039340  | 0.059289  |
| 17               | 7                | 0              | -2.373952               | -0.077800 | 0.027711  |
| 18               | 1                | 0              | -2.501978               | 0.921727  | -0.085374 |
| 19               | 8                | 0              | -0.192745               | 5.845689  | 0.320239  |
| 20               | 6                | 0              | 0.449517                | 6.647757  | -0.663210 |
| 21               | 1                | 0              | 0.028553                | 6.463579  | -1.655536 |
| 22               | 1                | 0              | 0.260588                | 7.680817  | -0.377249 |
| 23               | 1                | 0              | 1.527045                | 6.462748  | -0.675734 |
| 24               | 6                | 0              | -3.545504               | -0.855062 | 0.053350  |
| 25               | 6                | 0              | -4.731678               | -0.297081 | -0.418608 |
| 26               | 6                | 0              | -3.564613               | -2.161054 | 0.555882  |
| 27               | 6                | 0              | -5.921228               | -1.020732 | -0.407809 |
| 28               | 1                | 0              | -4.726439               | 0.716922  | -0.804904 |
| 29               | 6                | 0              | -4.743512               | -2.889218 | 0.553680  |
| 30               | 1                | 0              | -2.669792               | -2.611006 | 0.968515  |
| 31               | 6                | 0              | -5.928270               | -2.328594 | 0.072815  |
| 32               | 1                | 0              | -6.822295               | -0.554007 | -0.783278 |
| 33               | 1                | 0              | -4.762974               | -3.901548 | 0.941451  |
| 34               | 6                | 0              | 3.576553                | -0.779860 | -0.041892 |
| 35               | 6                | 0              | 4.708559                | -0.438990 | 0.699271  |
| 36               | 6                | 0              | 3.653761                | -1.893718 | -0.892972 |
| 37               | 6                | 0              | 5.873126                | -1.201303 | 0.643074  |
| 38               | 1                | 0              | 4.670402                | 0.434317  | 1.341606  |
| 39               | 6                | 0              | 4.810836                | -2.652360 | -0.965124 |
| 40               | 1                | 0              | 2.808784                | -2.152088 | -1.522172 |
| 41               | 6                | 0              | 5.924449                | -2.317650 | -0.190763 |
| 42               | 1                | 0              | 6.725158                | -0.910888 | 1.244069  |
| 43               | 1                | 0              | 4.872995                | -3.506442 | -1.630703 |
| 44               | 8                | 0              | -7.034805               | -3.125238 | 0.119825  |
| 45               | 8                | 0              | 7.015448                | -3.126264 | -0.324591 |
| 46               | 6                | 0              | -8.255095               | -2.580728 | -0.364681 |
| 47               | 1                | 0              | -8.173085               | -2.315083 | -1.422530 |
| 48               | 1                | 0              | -9.002154               | -3.363203 | -0.244715 |
| 49               | 1                | 0              | -8.551275               | -1.702347 | 0.215726  |
| 50               | 6                | 0              | 8.176904                | -2.791781 | 0.423472  |
| 51               | 1                | 0              | 7.974213                | -2.821235 | 1.497684  |
| 52               | 1                | 0              | 8.921599                | -3.545653 | 0.174798  |
| 53               | 1                | 0              | 8.551873                | -1.803159 | 0.143799  |

## Structure 40d (vacuum)

Energy (Hartrees): -1263.93265609

No imaginary frequencies

Standard orientation:

| Center<br>Number | Atomic<br>Number | Atomic<br>Type | Coordinates (Angstroms) |           |           |
|------------------|------------------|----------------|-------------------------|-----------|-----------|
|                  |                  |                | X                       | Y         | Z         |
| 1                | 6                | 0              | 1.357099                | 2.706466  | 0.871332  |
| 2                | 6                | 0              | 1.675692                | 4.045929  | 0.967888  |
| 3                | 6                | 0              | 1.006535                | 4.990427  | 0.182796  |
| 4                | 6                | 0              | 0.020898                | 4.571014  | -0.704154 |
| 5                | 6                | 0              | -0.286089               | 3.212333  | -0.792857 |
| 6                | 6                | 0              | 0.354166                | 2.260296  | -0.004192 |
| 7                | 1                | 0              | 1.887875                | 1.987859  | 1.482327  |
| 8                | 1                | 0              | 2.443562                | 4.394664  | 1.647627  |
| 9                | 1                | 0              | -0.500456               | 5.273051  | -1.340619 |
| 10               | 1                | 0              | -1.029592               | 2.891534  | -1.514566 |
| 11               | 6                | 0              | -0.040556               | 0.834076  | -0.061837 |
| 12               | 6                | 0              | -1.358771               | 0.515223  | -0.140647 |
| 13               | 6                | 0              | 0.959020                | -0.225550 | -0.015801 |
| 14               | 1                | 0              | 0.581375                | -1.238093 | 0.186432  |
| 15               | 1                | 0              | -1.303032               | -1.422453 | -0.822398 |
| 16               | 1                | 0              | -2.101747               | 1.300190  | -0.032929 |
| 17               | 7                | 0              | 2.209472                | -0.024743 | -0.175054 |
| 18               | 7                | 0              | -1.885725               | -0.726993 | -0.384164 |
| 19               | 8                | 0              | 1.392962                | 6.283803  | 0.350447  |
| 20               | 6                | 0              | 0.750694                | 7.263960  | -0.434817 |
| 21               | 1                | 0              | 1.194288                | 8.216501  | -0.152956 |
| 22               | 1                | 0              | 0.916734                | 7.086718  | -1.502352 |
| 23               | 1                | 0              | -0.325303               | 7.290231  | -0.233940 |
| 24               | 6                | 0              | 3.092806                | -1.108342 | -0.016873 |
| 25               | 6                | 0              | 4.200530                | -1.180885 | -0.858389 |
| 26               | 6                | 0              | 2.941781                | -2.091560 | 0.972531  |
| 27               | 6                | 0              | 5.110444                | -2.229387 | -0.766545 |
| 28               | 1                | 0              | 4.333897                | -0.403686 | -1.601471 |
| 29               | 6                | 0              | 3.851472                | -3.128509 | 1.083560  |
| 30               | 1                | 0              | 2.125387                | -2.018899 | 1.682411  |
| 31               | 6                | 0              | 4.935607                | -3.211943 | 0.207906  |
| 32               | 1                | 0              | 5.949748                | -2.259078 | -1.448095 |
| 33               | 1                | 0              | 3.751854                | -3.883292 | 1.854228  |
| 34               | 6                | 0              | -3.230321               | -1.068782 | -0.175183 |
| 35               | 6                | 0              | -3.800413               | -2.114260 | -0.895707 |
| 36               | 6                | 0              | -4.019317               | -0.384600 | 0.756747  |
| 37               | 6                | 0              | -5.131553               | -2.474593 | -0.707052 |
| 38               | 1                | 0              | -3.202383               | -2.652361 | -1.623446 |
| 39               | 6                | 0              | -5.349475               | -0.723973 | 0.929304  |
| 40               | 1                | 0              | -3.584003               | 0.396979  | 1.367250  |
| 41               | 6                | 0              | -5.918143               | -1.770298 | 0.202119  |
| 42               | 1                | 0              | -5.537692               | -3.294058 | -1.284248 |
| 43               | 1                | 0              | -5.967965               | -0.200120 | 1.647532  |
| 44               | 8                | 0              | -7.229003               | -2.032258 | 0.455546  |
| 45               | 8                | 0              | 5.771684                | -4.269389 | 0.393721  |
| 46               | 6                | 0              | -7.831049               | -3.093081 | -0.253532 |
| 47               | 1                | 0              | -7.331502               | -4.044329 | -0.042920 |
| 48               | 1                | 0              | -8.861084               | -3.142339 | 0.092356  |
| 49               | 1                | 0              | -7.818866               | -2.906050 | -1.332302 |
| 50               | 6                | 0              | 6.888584                | -4.377628 | -0.461467 |
| 51               | 1                | 0              | 7.419945                | -5.275542 | -0.153704 |
| 52               | 1                | 0              | 6.578894                | -4.479043 | -1.506749 |
| 53               | 1                | 0              | 7.550832                | -3.511471 | -0.361449 |

## Structure 40d (CHCl<sub>3</sub>)

Energy (Hartrees): -1263.96975910

No imaginary frequencies

Standard orientation:

| Center<br>Number | Atomic<br>Number | Atomic<br>Type | Coordinates (Angstroms) |           |           |
|------------------|------------------|----------------|-------------------------|-----------|-----------|
|                  |                  |                | X                       | Y         | Z         |
| 1                | 6                | 0              | 1.350598                | 2.709277  | 0.894544  |
| 2                | 6                | 0              | 1.675966                | 4.049287  | 0.985542  |
| 3                | 6                | 0              | 1.023192                | 4.991627  | 0.182448  |
| 4                | 6                | 0              | 0.046970                | 4.569366  | -0.715184 |
| 5                | 6                | 0              | -0.264860               | 3.210891  | -0.799122 |
| 6                | 6                | 0              | 0.360644                | 2.259627  | 0.004845  |
| 7                | 1                | 0              | 1.864023                | 1.995325  | 1.527034  |
| 8                | 1                | 0              | 2.435205                | 4.395225  | 1.677805  |
| 9                | 1                | 0              | -0.463108               | 5.270543  | -1.362499 |
| 10               | 1                | 0              | -1.004875               | 2.890447  | -1.525208 |
| 11               | 6                | 0              | -0.035968               | 0.831981  | -0.048512 |
| 12               | 6                | 0              | -1.361018               | 0.519092  | -0.127973 |
| 13               | 6                | 0              | 0.959852                | -0.225759 | 0.000095  |
| 14               | 1                | 0              | 0.581864                | -1.238821 | 0.188268  |
| 15               | 1                | 0              | -1.309435               | -1.445505 | -0.724252 |
| 16               | 1                | 0              | -2.094009               | 1.314381  | -0.029047 |
| 17               | 7                | 0              | 2.215260                | -0.026579 | -0.154066 |
| 18               | 7                | 0              | -1.898011               | -0.713260 | -0.352586 |
| 19               | 8                | 0              | 1.411613                | 6.284161  | 0.343957  |
| 20               | 6                | 0              | 0.768824                | 7.267647  | -0.448817 |
| 21               | 1                | 0              | 1.208756                | 8.221067  | -0.161904 |
| 22               | 1                | 0              | 0.945697                | 7.092659  | -1.514294 |
| 23               | 1                | 0              | -0.307303               | 7.291653  | -0.252410 |
| 24               | 6                | 0              | 3.096079                | -1.116041 | -0.006432 |
| 25               | 6                | 0              | 4.221153                | -1.168180 | -0.828862 |
| 26               | 6                | 0              | 2.925300                | -2.127856 | 0.951537  |
| 27               | 6                | 0              | 5.129980                | -2.219680 | -0.748918 |
| 28               | 1                | 0              | 4.373183                | -0.375255 | -1.552588 |
| 29               | 6                | 0              | 3.831490                | -3.170479 | 1.048584  |
| 30               | 1                | 0              | 2.095063                | -2.078489 | 1.647624  |
| 31               | 6                | 0              | 4.933821                | -3.231247 | 0.191884  |
| 32               | 1                | 0              | 5.983243                | -2.230509 | -1.414178 |
| 33               | 1                | 0              | 3.710517                | -3.945169 | 1.797269  |
| 34               | 6                | 0              | -3.249905               | -1.042994 | -0.160758 |
| 35               | 6                | 0              | -3.778304               | -2.158355 | -0.807252 |
| 36               | 6                | 0              | -4.082606               | -0.290652 | 0.675877  |
| 37               | 6                | 0              | -5.112059               | -2.520641 | -0.641209 |
| 38               | 1                | 0              | -3.141757               | -2.752590 | -1.454761 |
| 39               | 6                | 0              | -5.415542               | -0.635614 | 0.826006  |
| 40               | 1                | 0              | -3.687635               | 0.551886  | 1.230415  |
| 41               | 6                | 0              | -5.942878               | -1.750508 | 0.172002  |
| 42               | 1                | 0              | -5.485220               | -3.395777 | -1.156617 |
| 43               | 1                | 0              | -6.064138               | -0.056095 | 1.472733  |
| 44               | 8                | 0              | -7.259035               | -2.010817 | 0.395743  |
| 45               | 8                | 0              | 5.762463                | -4.296352 | 0.358501  |
| 46               | 6                | 0              | -7.817995               | -3.153461 | -0.229079 |
| 47               | 1                | 0              | -7.314058               | -4.068539 | 0.097111  |
| 48               | 1                | 0              | -8.861001               | -3.186149 | 0.080291  |
| 49               | 1                | 0              | -7.767261               | -3.073893 | -1.319387 |
| 50               | 6                | 0              | 6.919438                | -4.365485 | -0.457723 |
| 51               | 1                | 0              | 7.444504                | -5.271146 | -0.159819 |
| 52               | 1                | 0              | 6.654393                | -4.432966 | -1.517207 |
| 53               | 1                | 0              | 7.569238                | -3.500400 | -0.294565 |

## Structure 40d (DMSO)

Energy (Hartrees): -1263.96796176  
No imaginary frequencies

Standard orientation:

| Center<br>Number | Atomic<br>Number | Atomic<br>Type | Coordinates (Angstroms) |           |           |
|------------------|------------------|----------------|-------------------------|-----------|-----------|
|                  |                  |                | X                       | Y         | Z         |
| 1                | 6                | 0              | 1.325400                | 2.705884  | 0.887596  |
| 2                | 6                | 0              | 1.634452                | 4.050355  | 0.980807  |
| 3                | 6                | 0              | 0.967881                | 4.987574  | 0.181562  |
| 4                | 6                | 0              | -0.005304               | 4.552886  | -0.714983 |
| 5                | 6                | 0              | -0.299228               | 3.190359  | -0.801881 |
| 6                | 6                | 0              | 0.340979                | 2.243668  | -0.002710 |
| 7                | 1                | 0              | 1.844158                | 1.998953  | 1.524471  |
| 8                | 1                | 0              | 2.387638                | 4.401306  | 1.677505  |
| 9                | 1                | 0              | -0.530020               | 5.248283  | -1.357030 |
| 10               | 1                | 0              | -1.042570               | 2.864446  | -1.522319 |
| 11               | 6                | 0              | -0.039129               | 0.810933  | -0.056038 |
| 12               | 6                | 0              | -1.365235               | 0.486977  | -0.119608 |
| 13               | 6                | 0              | 0.966769                | -0.233960 | -0.020291 |
| 14               | 1                | 0              | 0.605003                | -1.252379 | 0.166021  |
| 15               | 1                | 0              | -1.301897               | -1.490521 | -0.667750 |
| 16               | 1                | 0              | -2.100388               | 1.279785  | -0.016553 |
| 17               | 7                | 0              | 2.220846                | -0.018130 | -0.185149 |
| 18               | 7                | 0              | -1.896131               | -0.745466 | -0.327813 |
| 19               | 8                | 0              | 1.336152                | 6.283234  | 0.345764  |
| 20               | 6                | 0              | 0.652307                | 7.260450  | -0.425112 |
| 21               | 1                | 0              | 1.069373                | 8.222188  | -0.132269 |
| 22               | 1                | 0              | 0.816851                | 7.103906  | -1.495084 |
| 23               | 1                | 0              | -0.420745               | 7.250385  | -0.212791 |
| 24               | 6                | 0              | 3.116833                | -1.095371 | -0.033475 |
| 25               | 6                | 0              | 4.251814                | -1.131011 | -0.844145 |
| 26               | 6                | 0              | 2.953744                | -2.108881 | 0.924702  |
| 27               | 6                | 0              | 5.181435                | -2.163800 | -0.750134 |
| 28               | 1                | 0              | 4.399963                | -0.340712 | -1.572149 |
| 29               | 6                | 0              | 3.878869                | -3.133731 | 1.034449  |
| 30               | 1                | 0              | 2.112662                | -2.077835 | 1.608738  |
| 31               | 6                | 0              | 4.994903                | -3.175935 | 0.192921  |
| 32               | 1                | 0              | 6.041274                | -2.159614 | -1.407254 |
| 33               | 1                | 0              | 3.759340                | -3.908685 | 1.783420  |
| 34               | 6                | 0              | -3.250291               | -1.073694 | -0.143165 |
| 35               | 6                | 0              | -3.763350               | -2.211145 | -0.763286 |
| 36               | 6                | 0              | -4.098251               | -0.300071 | 0.657955  |
| 37               | 6                | 0              | -5.098492               | -2.574149 | -0.607791 |
| 38               | 1                | 0              | -3.111898               | -2.822153 | -1.379823 |
| 39               | 6                | 0              | -5.432068               | -0.647376 | 0.798498  |
| 40               | 1                | 0              | -3.718271               | 0.563351  | 1.190561  |
| 41               | 6                | 0              | -5.945901               | -1.783836 | 0.169785  |
| 42               | 1                | 0              | -5.459063               | -3.466438 | -1.102661 |
| 43               | 1                | 0              | -6.089760               | -0.048104 | 1.417776  |
| 44               | 8                | 0              | -7.262586               | -2.044251 | 0.380180  |
| 45               | 8                | 0              | 5.843415                | -4.219739 | 0.374580  |
| 46               | 6                | 0              | -7.807141               | -3.201551 | -0.235524 |
| 47               | 1                | 0              | -7.307314               | -4.109201 | 0.115727  |
| 48               | 1                | 0              | -8.856085               | -3.231532 | 0.053378  |
| 49               | 1                | 0              | -7.733400               | -3.141671 | -1.325532 |
| 50               | 6                | 0              | 7.015605                | -4.259627 | -0.426055 |
| 51               | 1                | 0              | 7.561833                | -5.148992 | -0.117342 |
| 52               | 1                | 0              | 6.767347                | -4.337954 | -1.488548 |
| 53               | 1                | 0              | 7.637504                | -3.375296 | -0.258411 |

## Structure 40d (C<sub>2</sub>H<sub>5</sub>OH)

Energy (Hartrees): -1263.97162997

No imaginary frequencies

Standard orientation:

| Center<br>Number | Atomic<br>Number | Atomic<br>Type | Coordinates (Angstroms) |           |           |
|------------------|------------------|----------------|-------------------------|-----------|-----------|
|                  |                  |                | X                       | Y         | Z         |
| 1                | 6                | 0              | 1.314575                | 2.718083  | 0.925775  |
| 2                | 6                | 0              | 1.630678                | 4.061931  | 1.005192  |
| 3                | 6                | 0              | 0.986713                | 4.987831  | 0.176599  |
| 4                | 6                | 0              | 0.028784                | 4.549102  | -0.732488 |
| 5                | 6                | 0              | -0.272839               | 3.187424  | -0.804253 |
| 6                | 6                | 0              | 0.345889                | 2.250012  | 0.022010  |
| 7                | 1                | 0              | 1.815197                | 2.016684  | 1.583345  |
| 8                | 1                | 0              | 2.372097                | 4.420773  | 1.710846  |
| 9                | 1                | 0              | -0.476163               | 5.239098  | -1.395943 |
| 10               | 1                | 0              | -1.002191               | 2.853925  | -1.535574 |
| 11               | 6                | 0              | -0.036792               | 0.817783  | -0.022485 |
| 12               | 6                | 0              | -1.362195               | 0.495178  | -0.090958 |
| 13               | 6                | 0              | 0.968997                | -0.227297 | 0.013989  |
| 14               | 1                | 0              | 0.607531                | -1.244437 | 0.207583  |
| 15               | 1                | 0              | -1.296783               | -1.481125 | -0.643734 |
| 16               | 1                | 0              | -2.097808               | 1.288373  | 0.006332  |
| 17               | 7                | 0              | 2.221974                | -0.014716 | -0.162386 |
| 18               | 7                | 0              | -1.892140               | -0.738605 | -0.300596 |
| 19               | 8                | 0              | 1.364085                | 6.288529  | 0.327353  |
| 20               | 6                | 0              | 0.718334                | 7.259614  | -0.486089 |
| 21               | 1                | 0              | 1.146498                | 8.219733  | -0.204016 |
| 22               | 1                | 0              | 0.909649                | 7.071622  | -1.546146 |
| 23               | 1                | 0              | -0.359060               | 7.271847  | -0.299541 |
| 24               | 6                | 0              | 3.112392                | -1.098002 | -0.017852 |
| 25               | 6                | 0              | 4.225780                | -1.156491 | -0.856229 |
| 26               | 6                | 0              | 2.962302                | -2.095117 | 0.958669  |
| 27               | 6                | 0              | 5.144843                | -2.199303 | -0.772512 |
| 28               | 1                | 0              | 4.364510                | -0.377315 | -1.597993 |
| 29               | 6                | 0              | 3.877877                | -3.129993 | 1.058669  |
| 30               | 1                | 0              | 2.140234                | -2.042765 | 1.664395  |
| 31               | 6                | 0              | 4.968394                | -3.195497 | 0.187777  |
| 32               | 1                | 0              | 5.987312                | -2.214939 | -1.451446 |
| 33               | 1                | 0              | 3.769344                | -3.893794 | 1.820996  |
| 34               | 6                | 0              | -3.248126               | -1.065106 | -0.127604 |
| 35               | 6                | 0              | -3.760404               | -2.194987 | -0.762283 |
| 36               | 6                | 0              | -4.097574               | -0.296964 | 0.676758  |
| 37               | 6                | 0              | -5.097604               | -2.554565 | -0.619322 |
| 38               | 1                | 0              | -3.107724               | -2.802245 | -1.381218 |
| 39               | 6                | 0              | -5.433910               | -0.640344 | 0.804703  |
| 40               | 1                | 0              | -3.716616               | 0.558144  | 1.222103  |
| 41               | 6                | 0              | -5.944871               | -1.767450 | 0.159545  |
| 42               | 1                | 0              | -5.459262               | -3.440224 | -1.125255 |
| 43               | 1                | 0              | -6.095055               | -0.046910 | 1.426385  |
| 44               | 8                | 0              | -7.270038               | -2.025102 | 0.356449  |
| 45               | 8                | 0              | 5.811415                | -4.253377 | 0.359320  |
| 46               | 6                | 0              | -7.814879               | -3.178025 | -0.271321 |
| 47               | 1                | 0              | -7.320277               | -4.087531 | 0.081538  |
| 48               | 1                | 0              | -8.866359               | -3.203892 | 0.008725  |
| 49               | 1                | 0              | -7.730169               | -3.109460 | -1.359662 |
| 50               | 6                | 0              | 6.963118                | -4.318584 | -0.472166 |
| 51               | 1                | 0              | 7.504340                | -5.211808 | -0.165858 |
| 52               | 1                | 0              | 6.683046                | -4.406397 | -1.525666 |
| 53               | 1                | 0              | 7.598289                | -3.439907 | -0.329041 |

## Structure 41a (vacuum)

Energy (Hartrees): -1443.90494329  
 No imaginary frequencies

Standard orientation:

| Center<br>Number | Atomic<br>Number | Atomic<br>Type | Coordinates (Angstroms) |           |           |
|------------------|------------------|----------------|-------------------------|-----------|-----------|
|                  |                  |                | X                       | Y         | Z         |
| 1                | 6                | 0              | 1.036590                | 3.520538  | 1.010964  |
| 2                | 6                | 0              | 1.147745                | 4.897004  | 1.059587  |
| 3                | 6                | 0              | 0.381787                | 5.695062  | 0.204188  |
| 4                | 6                | 0              | -0.485906               | 5.092283  | -0.703490 |
| 5                | 6                | 0              | -0.575616               | 3.701925  | -0.748456 |
| 6                | 6                | 0              | 0.167372                | 2.891778  | 0.106932  |
| 7                | 1                | 0              | 1.616195                | 2.919562  | 1.703886  |
| 8                | 1                | 0              | 1.811980                | 5.384937  | 1.762232  |
| 9                | 1                | 0              | -1.079494               | 5.682745  | -1.388023 |
| 10               | 1                | 0              | -1.225666               | 3.243663  | -1.486309 |
| 11               | 6                | 0              | 0.043398                | 1.413850  | 0.073777  |
| 12               | 6                | 0              | -1.196433               | 0.844014  | 0.028976  |
| 13               | 6                | 0              | 1.254266                | 0.623526  | 0.083990  |
| 14               | 1                | 0              | -2.064321               | 1.492516  | 0.043542  |
| 15               | 1                | 0              | 2.193372                | 1.188714  | 0.100791  |
| 16               | 1                | 0              | -0.604173               | -1.072115 | -0.071458 |
| 17               | 7                | 0              | 1.274999                | -0.664950 | 0.076302  |
| 18               | 7                | 0              | -1.441066               | -0.487560 | -0.038320 |
| 19               | 8                | 0              | 0.554330                | 7.034148  | 0.330440  |
| 20               | 6                | 0              | -0.202275               | 7.878249  | -0.512864 |
| 21               | 1                | 0              | 0.076403                | 8.895837  | -0.249473 |
| 22               | 1                | 0              | 0.032725                | 7.697271  | -1.566381 |
| 23               | 1                | 0              | -1.275558               | 7.740369  | -0.348275 |
| 24               | 6                | 0              | 2.515071                | -1.317401 | 0.014469  |
| 25               | 6                | 0              | 2.700796                | -2.458233 | 0.805099  |
| 26               | 6                | 0              | 3.544065                | -0.892522 | -0.836522 |
| 27               | 6                | 0              | 3.905740                | -3.138134 | 0.786002  |
| 28               | 1                | 0              | 1.890853                | -2.785289 | 1.445212  |
| 29               | 6                | 0              | 4.751662                | -1.572460 | -0.869354 |
| 30               | 1                | 0              | 3.382560                | -0.045833 | -1.492643 |
| 31               | 6                | 0              | 4.914833                | -2.679582 | -0.050968 |
| 32               | 1                | 0              | 4.077304                | -4.011103 | 1.401144  |
| 33               | 1                | 0              | 5.558666                | -1.265809 | -1.521102 |
| 34               | 6                | 0              | -2.687269               | -1.101363 | -0.024929 |
| 35               | 6                | 0              | -2.739990               | -2.479759 | -0.284630 |
| 36               | 6                | 0              | -3.875183               | -0.407430 | 0.244461  |
| 37               | 6                | 0              | -3.947381               | -3.150310 | -0.287645 |
| 38               | 1                | 0              | -1.821399               | -3.015755 | -0.493688 |
| 39               | 6                | 0              | -5.087460               | -1.075627 | 0.233906  |
| 40               | 1                | 0              | -3.865155               | 0.647137  | 0.482163  |
| 41               | 6                | 0              | -5.111308               | -2.436375 | -0.032680 |
| 42               | 1                | 0              | -4.002631               | -4.211504 | -0.489320 |
| 43               | 1                | 0              | -6.013794               | -0.556769 | 0.440703  |
| 44               | 7                | 0              | 6.198253                | -3.402891 | -0.081506 |
| 45               | 8                | 0              | 6.315675                | -4.367181 | 0.644096  |
| 46               | 8                | 0              | 7.058939                | -2.987919 | -0.828071 |
| 47               | 7                | 0              | -6.399403               | -3.141321 | -0.039213 |
| 48               | 8                | 0              | -7.398521               | -2.488797 | 0.179903  |
| 49               | 8                | 0              | -6.385968               | -4.333469 | -0.263709 |

## Structure 41a (CHCl<sub>3</sub>)

Energy (Hartrees): -1443.94192725  
 No imaginary frequencies

Standard orientation:

| Center<br>Number | Atomic<br>Number | Atomic<br>Type | Coordinates (Angstroms) |           |           |
|------------------|------------------|----------------|-------------------------|-----------|-----------|
|                  |                  |                | X                       | Y         | Z         |
| 1                | 6                | 0              | 0.981876                | 3.579812  | 0.973914  |
| 2                | 6                | 0              | 1.047321                | 4.961392  | 1.004617  |
| 3                | 6                | 0              | 0.216005                | 5.724242  | 0.178033  |
| 4                | 6                | 0              | -0.670370               | 5.081996  | -0.684441 |
| 5                | 6                | 0              | -0.714482               | 3.688843  | -0.712375 |
| 6                | 6                | 0              | 0.094154                | 2.911351  | 0.116812  |
| 7                | 1                | 0              | 1.614960                | 3.008169  | 1.644736  |
| 8                | 1                | 0              | 1.727964                | 5.474323  | 1.674363  |
| 9                | 1                | 0              | -1.314325               | 5.645504  | -1.346671 |
| 10               | 1                | 0              | -1.386901               | 3.205023  | -1.413478 |
| 11               | 6                | 0              | 0.016886                | 1.428229  | 0.102214  |
| 12               | 6                | 0              | -1.209159               | 0.823087  | 0.065049  |
| 13               | 6                | 0              | 1.251704                | 0.678097  | 0.115962  |
| 14               | 1                | 0              | -2.096333               | 1.445554  | 0.073275  |
| 15               | 1                | 0              | 2.172392                | 1.270621  | 0.124685  |
| 16               | 1                | 0              | -0.567550               | -1.083743 | -0.031422 |
| 17               | 7                | 0              | 1.308607                | -0.611138 | 0.119991  |
| 18               | 7                | 0              | -1.415202               | -0.514548 | 0.009783  |
| 19               | 8                | 0              | 0.344398                | 7.070909  | 0.283453  |
| 20               | 6                | 0              | -0.493145               | 7.880278  | -0.526241 |
| 21               | 1                | 0              | -0.244829               | 8.910944  | -0.280331 |
| 22               | 1                | 0              | -0.301854               | 7.705111  | -1.589044 |
| 23               | 1                | 0              | -1.549182               | 7.698904  | -0.305173 |
| 24               | 6                | 0              | 2.559013                | -1.236618 | 0.047680  |
| 25               | 6                | 0              | 2.744386                | -2.418524 | 0.778853  |
| 26               | 6                | 0              | 3.598884                | -0.755903 | -0.762081 |
| 27               | 6                | 0              | 3.953681                | -3.088313 | 0.739265  |
| 28               | 1                | 0              | 1.929314                | -2.790110 | 1.388262  |
| 29               | 6                | 0              | 4.812193                | -1.421632 | -0.812356 |
| 30               | 1                | 0              | 3.444474                | 0.126598  | -1.371157 |
| 31               | 6                | 0              | 4.971966                | -2.575669 | -0.056838 |
| 32               | 1                | 0              | 4.112476                | -3.994574 | 1.308473  |
| 33               | 1                | 0              | 5.620649                | -1.063879 | -1.436018 |
| 34               | 6                | 0              | -2.641573               | -1.163617 | 0.011026  |
| 35               | 6                | 0              | -2.645162               | -2.544054 | -0.249499 |
| 36               | 6                | 0              | -3.854023               | -0.505519 | 0.267301  |
| 37               | 6                | 0              | -3.829806               | -3.251499 | -0.272960 |
| 38               | 1                | 0              | -1.706542               | -3.050823 | -0.443071 |
| 39               | 6                | 0              | -5.043603               | -1.210737 | 0.236569  |
| 40               | 1                | 0              | -3.880337               | 0.548545  | 0.507099  |
| 41               | 6                | 0              | -5.020656               | -2.573001 | -0.034465 |
| 42               | 1                | 0              | -3.838526               | -4.313228 | -0.480271 |
| 43               | 1                | 0              | -5.984176               | -0.712441 | 0.430910  |
| 44               | 7                | 0              | 6.253462                | -3.285538 | -0.112971 |
| 45               | 8                | 0              | 6.367701                | -4.310929 | 0.529548  |
| 46               | 8                | 0              | 7.139463                | -2.813016 | -0.797968 |
| 47               | 7                | 0              | -6.279829               | -3.311443 | -0.070016 |
| 48               | 8                | 0              | -7.312652               | -2.692929 | 0.105526  |
| 49               | 8                | 0              | -6.236093               | -4.509694 | -0.275424 |

## Structure 41a (DMSO)

Energy (Hartrees): -1443.93880738

No imaginary frequencies

Standard orientation:

| Center<br>Number | Atomic<br>Number | Atomic<br>Type | Coordinates (Angstroms) |           |           |
|------------------|------------------|----------------|-------------------------|-----------|-----------|
|                  |                  |                | X                       | Y         | Z         |
| 1                | 6                | 0              | 0.992411                | 3.606752  | 0.948090  |
| 2                | 6                | 0              | 1.050394                | 4.989742  | 0.965395  |
| 3                | 6                | 0              | 0.183462                | 5.742852  | 0.166453  |
| 4                | 6                | 0              | -0.732073               | 5.087733  | -0.656277 |
| 5                | 6                | 0              | -0.768790               | 3.694127  | -0.671881 |
| 6                | 6                | 0              | 0.076397                | 2.926484  | 0.130647  |
| 7                | 1                | 0              | 1.657529                | 3.045678  | 1.596544  |
| 8                | 1                | 0              | 1.756139                | 5.507994  | 1.604602  |
| 9                | 1                | 0              | -1.405664               | 5.640885  | -1.297625 |
| 10               | 1                | 0              | -1.467132               | 3.202342  | -1.341450 |
| 11               | 6                | 0              | 0.009644                | 1.442990  | 0.124870  |
| 12               | 6                | 0              | -1.213951               | 0.829198  | 0.094951  |
| 13               | 6                | 0              | 1.249954                | 0.703270  | 0.131908  |
| 14               | 1                | 0              | -2.106394               | 1.443993  | 0.104381  |
| 15               | 1                | 0              | 2.166547                | 1.301275  | 0.128012  |
| 16               | 1                | 0              | -0.557047               | -1.076128 | 0.021746  |
| 17               | 7                | 0              | 1.313033                | -0.586504 | 0.143651  |
| 18               | 7                | 0              | -1.407930               | -0.509658 | 0.049227  |
| 19               | 8                | 0              | 0.305622                | 7.090435  | 0.255672  |
| 20               | 6                | 0              | -0.578498               | 7.882824  | -0.524883 |
| 21               | 1                | 0              | -0.338582               | 8.919142  | -0.294668 |
| 22               | 1                | 0              | -0.427555               | 7.703993  | -1.593356 |
| 23               | 1                | 0              | -1.621773               | 7.684522  | -0.262571 |
| 24               | 6                | 0              | 2.562557                | -1.209957 | 0.060307  |
| 25               | 6                | 0              | 2.739546                | -2.411862 | 0.761584  |
| 26               | 6                | 0              | 3.609035                | -0.713770 | -0.732597 |
| 27               | 6                | 0              | 3.945146                | -3.087117 | 0.710117  |
| 28               | 1                | 0              | 1.919516                | -2.798359 | 1.355151  |
| 29               | 6                | 0              | 4.818417                | -1.384806 | -0.794576 |
| 30               | 1                | 0              | 3.465797                | 0.185398  | -1.319662 |
| 31               | 6                | 0              | 4.970253                | -2.559123 | -0.067711 |
| 32               | 1                | 0              | 4.091421                | -4.009193 | 1.256859  |
| 33               | 1                | 0              | 5.629157                | -1.011382 | -1.405918 |
| 34               | 6                | 0              | -2.626827               | -1.170533 | 0.034655  |
| 35               | 6                | 0              | -2.601881               | -2.562423 | -0.157981 |
| 36               | 6                | 0              | -3.856708               | -0.516846 | 0.205084  |
| 37               | 6                | 0              | -3.775035               | -3.287387 | -0.197113 |
| 38               | 1                | 0              | -1.648658               | -3.063194 | -0.285607 |
| 39               | 6                | 0              | -5.033997               | -1.241396 | 0.163243  |
| 40               | 1                | 0              | -3.909446               | 0.548616  | 0.380762  |
| 41               | 6                | 0              | -4.983830               | -2.615489 | -0.040359 |
| 42               | 1                | 0              | -3.757767               | -4.357840 | -0.352015 |
| 43               | 1                | 0              | -5.985836               | -0.743780 | 0.293370  |
| 44               | 7                | 0              | 6.247324                | -3.272160 | -0.135490 |
| 45               | 8                | 0              | 6.363933                | -4.302562 | 0.501127  |
| 46               | 8                | 0              | 7.132859                | -2.799677 | -0.823470 |
| 47               | 7                | 0              | -6.229847               | -3.371582 | -0.089213 |
| 48               | 8                | 0              | -7.277060               | -2.766437 | 0.054943  |
| 49               | 8                | 0              | -6.166862               | -4.573785 | -0.274438 |



## Structure 41a (C<sub>2</sub>H<sub>5</sub>OH)

Energy (Hartrees): -1443.93962684

No imaginary frequencies

Standard orientation:

| Center<br>Number | Atomic<br>Number | Atomic<br>Type | Coordinates (Angstroms) |           |           |
|------------------|------------------|----------------|-------------------------|-----------|-----------|
|                  |                  |                | X                       | Y         | Z         |
| 1                | 6                | 0              | -1.687213               | 3.322234  | -0.748875 |
| 2                | 6                | 0              | -2.075082               | 4.660845  | -0.722065 |
| 3                | 6                | 0              | -1.392657               | 5.555904  | 0.099356  |
| 4                | 6                | 0              | -0.335301               | 5.098776  | 0.890901  |
| 5                | 6                | 0              | 0.029889                | 3.763602  | 0.861375  |
| 6                | 6                | 0              | -0.633704               | 2.846175  | 0.033216  |
| 7                | 1                | 0              | -2.213785               | 2.645089  | -1.413974 |
| 8                | 1                | 0              | -2.894034               | 4.986962  | -1.349594 |
| 9                | 1                | 0              | 0.177804                | 5.802224  | 1.537243  |
| 10               | 1                | 0              | 0.832598                | 3.423485  | 1.507616  |
| 11               | 6                | 0              | -0.235507               | 1.416704  | -0.015060 |
| 12               | 6                | 0              | 1.092317                | 1.089784  | -0.007199 |
| 13               | 6                | 0              | -1.284419               | 0.422636  | -0.048807 |
| 14               | 1                | 0              | 1.824449                | 1.888302  | 0.013784  |
| 15               | 1                | 0              | -2.307901               | 0.802591  | 0.033766  |
| 16               | 1                | 0              | 0.878792                | -0.914955 | -0.083834 |
| 17               | 7                | 0              | -1.071221               | -0.844880 | -0.167696 |
| 18               | 7                | 0              | 1.580402                | -0.174472 | -0.032624 |
| 19               | 8                | 0              | -1.687326               | 6.881255  | 0.198786  |
| 20               | 6                | 0              | -2.757786               | 7.380483  | -0.593872 |
| 21               | 1                | 0              | -2.824529               | 8.443638  | -0.370791 |
| 22               | 1                | 0              | -2.552453               | 7.243449  | -1.659169 |
| 23               | 1                | 0              | -3.700062               | 6.891925  | -0.330873 |
| 24               | 6                | 0              | -2.159556               | -1.719327 | -0.080516 |
| 25               | 6                | 0              | -2.187532               | -2.831396 | -0.934846 |
| 26               | 6                | 0              | -3.182411               | -1.547690 | 0.865078  |
| 27               | 6                | 0              | -3.232733               | -3.734436 | -0.878288 |
| 28               | 1                | 0              | -1.386346               | -2.967094 | -1.651536 |
| 29               | 6                | 0              | -4.231749               | -2.447792 | 0.932971  |
| 30               | 1                | 0              | -3.138036               | -0.722481 | 1.565926  |
| 31               | 6                | 0              | -4.243319               | -3.525223 | 0.055377  |
| 32               | 1                | 0              | -3.267979               | -4.586353 | -1.544357 |
| 33               | 1                | 0              | -5.020357               | -2.325520 | 1.663799  |
| 34               | 6                | 0              | 2.912639                | -0.553914 | -0.019997 |
| 35               | 6                | 0              | 3.187538                | -1.932893 | -0.056501 |
| 36               | 6                | 0              | 3.975164                | 0.362683  | 0.030200  |
| 37               | 6                | 0              | 4.487645                | -2.391043 | -0.041963 |
| 38               | 1                | 0              | 2.363879                | -2.637344 | -0.094844 |
| 39               | 6                | 0              | 5.279407                | -0.094033 | 0.043352  |
| 40               | 1                | 0              | 3.801633                | 1.429280  | 0.059259  |
| 41               | 6                | 0              | 5.524612                | -1.462588 | 0.007636  |
| 42               | 1                | 0              | 4.698987                | -3.451804 | -0.069546 |
| 43               | 1                | 0              | 6.102643                | 0.607136  | 0.082937  |
| 44               | 7                | 0              | -5.346664               | -4.477845 | 0.124843  |
| 45               | 8                | 0              | -5.302575               | -5.469102 | -0.580619 |
| 46               | 8                | 0              | -6.268434               | -4.241405 | 0.884508  |
| 47               | 7                | 0              | 6.897619                | -1.934462 | 0.021623  |
| 48               | 8                | 0              | 7.796287                | -1.110535 | 0.038379  |
| 49               | 8                | 0              | 7.099834                | -3.136947 | 0.015488  |

## Structure 41b (vacuum)

Energy (Hartrees): -1443.89916485  
 No imaginary frequencies

Standard orientation:

| Center<br>Number | Atomic<br>Number | Atomic<br>Type | Coordinates (Angstroms) |           |           |
|------------------|------------------|----------------|-------------------------|-----------|-----------|
|                  |                  |                | X                       | Y         | Z         |
| 1                | 6                | 0              | 0.407378                | 3.169581  | -0.821601 |
| 2                | 6                | 0              | 0.159118                | 4.540157  | -0.789612 |
| 3                | 6                | 0              | -0.710134               | 5.058933  | 0.169049  |
| 4                | 6                | 0              | -1.313138               | 4.199072  | 1.092561  |
| 5                | 6                | 0              | -1.050027               | 2.842424  | 1.051631  |
| 6                | 6                | 0              | -0.188502               | 2.296859  | 0.086616  |
| 7                | 1                | 0              | 1.074599                | 2.774077  | -1.580534 |
| 8                | 1                | 0              | 0.640541                | 5.182054  | -1.514757 |
| 9                | 1                | 0              | -1.970586               | 4.625314  | 1.840352  |
| 10               | 1                | 0              | -1.497801               | 2.189027  | 1.793851  |
| 11               | 6                | 0              | 0.097131                | 0.842641  | 0.043940  |
| 12               | 6                | 0              | -0.876858               | -0.098006 | 0.011638  |
| 13               | 6                | 0              | 1.488966                | 0.402525  | 0.013828  |
| 14               | 1                | 0              | 2.236460                | 1.191129  | 0.169799  |
| 15               | 1                | 0              | -0.585670               | -1.141528 | -0.000686 |
| 16               | 7                | 0              | 1.841745                | -0.809333 | -0.189422 |
| 17               | 7                | 0              | -2.214199               | 0.167825  | -0.065639 |
| 18               | 1                | 0              | -2.476462               | 1.133377  | -0.220660 |
| 19               | 8                | 0              | -1.026803               | 6.370090  | 0.287641  |
| 20               | 6                | 0              | -0.417198               | 7.280854  | -0.605821 |
| 21               | 1                | 0              | -0.688890               | 7.058365  | -1.642248 |
| 22               | 1                | 0              | -0.793913               | 8.264383  | -0.335688 |
| 23               | 1                | 0              | 0.671896                | 7.265872  | -0.500514 |
| 24               | 6                | 0              | -3.245327               | -0.760885 | -0.032903 |
| 25               | 6                | 0              | -4.530333               | -0.340554 | -0.409521 |
| 26               | 6                | 0              | -3.046172               | -2.087001 | 0.375688  |
| 27               | 6                | 0              | -5.592035               | -1.223610 | -0.393204 |
| 28               | 1                | 0              | -4.685422               | 0.684391  | -0.727006 |
| 29               | 6                | 0              | -4.107507               | -2.975509 | 0.383378  |
| 30               | 1                | 0              | -2.074505               | -2.425909 | 0.707331  |
| 31               | 6                | 0              | -5.365751               | -2.536774 | -0.001648 |
| 32               | 1                | 0              | -6.586650               | -0.914884 | -0.685085 |
| 33               | 1                | 0              | -3.974021               | -4.002191 | 0.696838  |
| 34               | 6                | 0              | 3.197212                | -1.142555 | -0.099080 |
| 35               | 6                | 0              | 4.031941                | -0.647856 | 0.912893  |
| 36               | 6                | 0              | 3.714988                | -2.048502 | -1.034968 |
| 37               | 6                | 0              | 5.366449                | -1.018900 | 0.966709  |
| 38               | 1                | 0              | 3.622621                | 0.005450  | 1.674013  |
| 39               | 6                | 0              | 5.047849                | -2.415583 | -0.996694 |
| 40               | 1                | 0              | 3.050680                | -2.444346 | -1.792749 |
| 41               | 6                | 0              | 5.854995                | -1.890362 | 0.004982  |
| 42               | 1                | 0              | 6.026810                | -0.653018 | 1.741350  |
| 43               | 1                | 0              | 5.469647                | -3.102198 | -1.718221 |
| 44               | 7                | 0              | -6.488508               | -3.482504 | 0.012598  |
| 45               | 8                | 0              | -6.260202               | -4.620954 | 0.363949  |
| 46               | 8                | 0              | -7.576447               | -3.067763 | -0.329051 |
| 47               | 7                | 0              | 7.272429                | -2.285127 | 0.057979  |
| 48               | 8                | 0              | 7.950304                | -1.830145 | 0.955318  |
| 49               | 8                | 0              | 7.678413                | -3.039614 | -0.800502 |

## Structure 41b (CHCl<sub>3</sub>)

Energy (Hartrees): -1443.93767487

No imaginary frequencies

Standard orientation:

| Center<br>Number | Atomic<br>Number | Atomic<br>Type | Coordinates (Angstroms) |           |           |
|------------------|------------------|----------------|-------------------------|-----------|-----------|
|                  |                  |                | X                       | Y         | Z         |
| 1                | 6                | 0              | 0.432810                | 3.158672  | -0.803054 |
| 2                | 6                | 0              | 0.188961                | 4.530403  | -0.771025 |
| 3                | 6                | 0              | -0.692747               | 5.049075  | 0.177244  |
| 4                | 6                | 0              | -1.311719               | 4.188511  | 1.090032  |
| 5                | 6                | 0              | -1.055077               | 2.829613  | 1.047566  |
| 6                | 6                | 0              | -0.181395               | 2.284470  | 0.093396  |
| 7                | 1                | 0              | 1.112235                | 2.765466  | -1.552822 |
| 8                | 1                | 0              | 0.682676                | 5.173472  | -1.487364 |
| 9                | 1                | 0              | -1.982283               | 4.609295  | 1.830354  |
| 10               | 1                | 0              | -1.524101               | 2.177253  | 1.777669  |
| 11               | 6                | 0              | 0.097511                | 0.827815  | 0.047978  |
| 12               | 6                | 0              | -0.882699               | -0.111381 | 0.018471  |
| 13               | 6                | 0              | 1.485544                | 0.388838  | 0.018590  |
| 14               | 1                | 0              | 2.230918                | 1.172021  | 0.200730  |
| 15               | 1                | 0              | -0.602735               | -1.158391 | 0.019363  |
| 16               | 7                | 0              | 1.847635                | -0.818362 | -0.219317 |
| 17               | 7                | 0              | -2.214944               | 0.160845  | -0.062483 |
| 18               | 1                | 0              | -2.480936               | 1.124819  | -0.234437 |
| 19               | 8                | 0              | -1.006113               | 6.362102  | 0.291643  |
| 20               | 6                | 0              | -0.398890               | 7.270157  | -0.614736 |
| 21               | 1                | 0              | -0.669794               | 7.035784  | -1.648297 |
| 22               | 1                | 0              | -0.782325               | 8.254750  | -0.354630 |
| 23               | 1                | 0              | 0.689522                | 7.265233  | -0.506444 |
| 24               | 6                | 0              | -3.250027               | -0.760386 | -0.026493 |
| 25               | 6                | 0              | -4.524396               | -0.335656 | -0.438645 |
| 26               | 6                | 0              | -3.069134               | -2.079328 | 0.416883  |
| 27               | 6                | 0              | -5.592673               | -1.208766 | -0.425912 |
| 28               | 1                | 0              | -4.661576               | 0.684447  | -0.779714 |
| 29               | 6                | 0              | -4.137319               | -2.957768 | 0.422949  |
| 30               | 1                | 0              | -2.107910               | -2.420347 | 0.777163  |
| 31               | 6                | 0              | -5.385223               | -2.517172 | -0.000580 |
| 32               | 1                | 0              | -6.574381               | -0.888810 | -0.748450 |
| 33               | 1                | 0              | -4.009516               | -3.976008 | 0.765467  |
| 34               | 6                | 0              | 3.201873                | -1.147390 | -0.119078 |
| 35               | 6                | 0              | 4.027670                | -0.660016 | 0.905801  |
| 36               | 6                | 0              | 3.730929                | -2.044855 | -1.059269 |
| 37               | 6                | 0              | 5.361217                | -1.029077 | 0.968313  |
| 38               | 1                | 0              | 3.613798                | -0.010403 | 1.667682  |
| 39               | 6                | 0              | 5.062714                | -2.412145 | -1.011586 |
| 40               | 1                | 0              | 3.078824                | -2.435923 | -1.830828 |
| 41               | 6                | 0              | 5.860906                | -1.893582 | 0.002951  |
| 42               | 1                | 0              | 6.005818                | -0.662708 | 1.756251  |
| 43               | 1                | 0              | 5.482525                | -3.092888 | -1.740188 |
| 44               | 7                | 0              | -6.508694               | -3.448879 | 0.007703  |
| 45               | 8                | 0              | -6.306113               | -4.589640 | 0.378833  |
| 46               | 8                | 0              | -7.594892               | -3.040016 | -0.357759 |
| 47               | 7                | 0              | 7.271405                | -2.283871 | 0.064985  |
| 48               | 8                | 0              | 7.956199                | -1.818964 | 0.955666  |
| 49               | 8                | 0              | 7.690719                | -3.051655 | -0.779194 |

## Structure 41b (DMSO)

Energy (Hartrees): -1443.93521558  
No imaginary frequencies

Standard orientation:

| Center<br>Number | Atomic<br>Number | Atomic<br>Type | Coordinates (Angstroms) |           |           |
|------------------|------------------|----------------|-------------------------|-----------|-----------|
|                  |                  |                | X                       | Y         | Z         |
| 1                | 6                | 0              | 0.497655                | 3.187022  | -0.779690 |
| 2                | 6                | 0              | 0.281014                | 4.563191  | -0.738932 |
| 3                | 6                | 0              | -0.635824               | 5.087678  | 0.173154  |
| 4                | 6                | 0              | -1.316761               | 4.225943  | 1.040035  |
| 5                | 6                | 0              | -1.085681               | 2.862369  | 0.990531  |
| 6                | 6                | 0              | -0.176624               | 2.312309  | 0.072655  |
| 7                | 1                | 0              | 1.205599                | 2.791610  | -1.501537 |
| 8                | 1                | 0              | 0.824432                | 5.204223  | -1.420447 |
| 9                | 1                | 0              | -2.016014               | 4.645859  | 1.754181  |
| 10               | 1                | 0              | -1.604062               | 2.213550  | 1.689586  |
| 11               | 6                | 0              | 0.085763                | 0.853483  | 0.023485  |
| 12               | 6                | 0              | -0.899050               | -0.083723 | -0.002782 |
| 13               | 6                | 0              | 1.469471                | 0.404233  | -0.002950 |
| 14               | 1                | 0              | 2.220498                | 1.177540  | 0.194245  |
| 15               | 1                | 0              | -0.621442               | -1.131334 | 0.007775  |
| 16               | 7                | 0              | 1.823680                | -0.804217 | -0.255837 |
| 17               | 7                | 0              | -2.229749               | 0.184355  | -0.086645 |
| 18               | 1                | 0              | -2.505529               | 1.145728  | -0.263062 |
| 19               | 8                | 0              | -0.924564               | 6.405270  | 0.292312  |
| 20               | 6                | 0              | -0.232533               | 7.310638  | -0.557267 |
| 21               | 1                | 0              | -0.447889               | 7.106628  | -1.609873 |
| 22               | 1                | 0              | -0.597168               | 8.302950  | -0.299350 |
| 23               | 1                | 0              | 0.846604                | 7.264800  | -0.385394 |
| 24               | 6                | 0              | -3.259232               | -0.741387 | -0.038015 |
| 25               | 6                | 0              | -4.540313               | -0.321579 | -0.435732 |
| 26               | 6                | 0              | -3.067026               | -2.060264 | 0.402796  |
| 27               | 6                | 0              | -5.603207               | -1.200688 | -0.414302 |
| 28               | 1                | 0              | -4.685795               | 0.698917  | -0.772350 |
| 29               | 6                | 0              | -4.129836               | -2.944430 | 0.416861  |
| 30               | 1                | 0              | -2.101156               | -2.398293 | 0.753638  |
| 31               | 6                | 0              | -5.384849               | -2.509735 | 0.006367  |
| 32               | 1                | 0              | -6.588454               | -0.881646 | -0.727331 |
| 33               | 1                | 0              | -3.988896               | -3.961574 | 0.757607  |
| 34               | 6                | 0              | 3.172416                | -1.149453 | -0.143288 |
| 35               | 6                | 0              | 4.001010                | -0.663347 | 0.880784  |
| 36               | 6                | 0              | 3.692580                | -2.067332 | -1.069531 |
| 37               | 6                | 0              | 5.326003                | -1.058396 | 0.958629  |
| 38               | 1                | 0              | 3.596622                | 0.006319  | 1.630420  |
| 39               | 6                | 0              | 5.016013                | -2.460885 | -1.006505 |
| 40               | 1                | 0              | 3.041341                | -2.456971 | -1.842847 |
| 41               | 6                | 0              | 5.816058                | -1.947196 | 0.009499  |
| 42               | 1                | 0              | 5.968951                | -0.691308 | 1.747752  |
| 43               | 1                | 0              | 5.424333                | -3.158829 | -1.725445 |
| 44               | 7                | 0              | -6.501776               | -3.445890 | 0.026052  |
| 45               | 8                | 0              | -6.287093               | -4.592513 | 0.376776  |
| 46               | 8                | 0              | -7.599693               | -3.039180 | -0.310184 |
| 47               | 7                | 0              | 7.214022                | -2.371175 | 0.092555  |
| 48               | 8                | 0              | 7.895073                | -1.933296 | 1.001176  |
| 49               | 8                | 0              | 7.631589                | -3.141578 | -0.751986 |

## Structure 41b (C<sub>2</sub>H<sub>5</sub>OH)

Energy (Hartrees): -1443.93607795

No imaginary frequencies

Standard orientation:

| Center<br>Number | Atomic<br>Number | Atomic<br>Type | Coordinates (Angstroms) |           |           |
|------------------|------------------|----------------|-------------------------|-----------|-----------|
|                  |                  |                | X                       | Y         | Z         |
| 1                | 6                | 0              | 0.491995                | 3.152556  | -0.795357 |
| 2                | 6                | 0              | 0.280697                | 4.529511  | -0.756074 |
| 3                | 6                | 0              | -0.611824               | 5.058641  | 0.175575  |
| 4                | 6                | 0              | -1.276813               | 4.205905  | 1.061867  |
| 5                | 6                | 0              | -1.052237               | 2.841000  | 1.012562  |
| 6                | 6                | 0              | -0.165854               | 2.285090  | 0.076901  |
| 7                | 1                | 0              | 1.182283                | 2.750847  | -1.530817 |
| 8                | 1                | 0              | 0.808714                | 5.166660  | -1.453121 |
| 9                | 1                | 0              | -1.957609               | 4.633150  | 1.789695  |
| 10               | 1                | 0              | -1.557034               | 2.195830  | 1.724834  |
| 11               | 6                | 0              | 0.090344                | 0.824629  | 0.029506  |
| 12               | 6                | 0              | -0.900995               | -0.104703 | 0.002824  |
| 13               | 6                | 0              | 1.472447                | 0.371719  | 0.003639  |
| 14               | 1                | 0              | 2.224156                | 1.144515  | 0.199616  |
| 15               | 1                | 0              | -0.635345               | -1.155321 | 0.013026  |
| 16               | 7                | 0              | 1.826504                | -0.836970 | -0.249515 |
| 17               | 7                | 0              | -2.229341               | 0.178898  | -0.085800 |
| 18               | 1                | 0              | -2.491418               | 1.143602  | -0.265666 |
| 19               | 8                | 0              | -0.892833               | 6.383056  | 0.296815  |
| 20               | 6                | 0              | -0.208550               | 7.286760  | -0.563483 |
| 21               | 1                | 0              | -0.442016               | 7.082345  | -1.611767 |
| 22               | 1                | 0              | -0.565736               | 8.279852  | -0.297982 |
| 23               | 1                | 0              | 0.872043                | 7.233412  | -0.404787 |
| 24               | 6                | 0              | -3.269338               | -0.733260 | -0.039278 |
| 25               | 6                | 0              | -4.541177               | -0.301649 | -0.455187 |
| 26               | 6                | 0              | -3.097717               | -2.049500 | 0.418982  |
| 27               | 6                | 0              | -5.614556               | -1.166315 | -0.435785 |
| 28               | 1                | 0              | -4.670297               | 0.716571  | -0.804965 |
| 29               | 6                | 0              | -4.171073               | -2.919618 | 0.433225  |
| 30               | 1                | 0              | -2.139686               | -2.394345 | 0.784597  |
| 31               | 6                | 0              | -5.416695               | -2.473422 | 0.003668  |
| 32               | 1                | 0              | -6.592026               | -0.837733 | -0.763061 |
| 33               | 1                | 0              | -4.046133               | -3.933792 | 0.788835  |
| 34               | 6                | 0              | 3.176497                | -1.176154 | -0.137434 |
| 35               | 6                | 0              | 3.997091                | -0.695598 | 0.895906  |
| 36               | 6                | 0              | 3.706850                | -2.078587 | -1.073262 |
| 37               | 6                | 0              | 5.325850                | -1.075734 | 0.971322  |
| 38               | 1                | 0              | 3.583112                | -0.040891 | 1.653495  |
| 39               | 6                | 0              | 5.034056                | -2.457702 | -1.013504 |
| 40               | 1                | 0              | 3.061508                | -2.465494 | -1.852836 |
| 41               | 6                | 0              | 5.826798                | -1.945714 | 0.009830  |
| 42               | 1                | 0              | 5.962897                | -0.711658 | 1.766725  |
| 43               | 1                | 0              | 5.451219                | -3.142205 | -1.740428 |
| 44               | 7                | 0              | -6.541500               | -3.391134 | 0.022453  |
| 45               | 8                | 0              | -6.357601               | -4.531368 | 0.413684  |
| 46               | 8                | 0              | -7.628501               | -2.986632 | -0.354320 |
| 47               | 7                | 0              | 7.226850                | -2.346535 | 0.084027  |
| 48               | 8                | 0              | 7.909043                | -1.909842 | 0.993554  |
| 49               | 8                | 0              | 7.659768                | -3.100500 | -0.768761 |

**Structure 41c (vacuum)**

Energy (Hartrees): -1443.90018400  
 No imaginary frequencies

Standard orientation:

| Center<br>Number | Atomic<br>Number | Atomic<br>Type | Coordinates (Angstroms) |           |           |
|------------------|------------------|----------------|-------------------------|-----------|-----------|
|                  |                  |                | X                       | Y         | Z         |
| 1                | 6                | 0              | 0.664834                | 2.576886  | -0.817813 |
| 2                | 6                | 0              | 0.592705                | 3.966538  | -0.831225 |
| 3                | 6                | 0              | -0.171657               | 4.627269  | 0.130372  |
| 4                | 6                | 0              | -0.849652               | 3.887354  | 1.102879  |
| 5                | 6                | 0              | -0.768258               | 2.506147  | 1.102450  |
| 6                | 6                | 0              | -0.017867               | 1.824109  | 0.134467  |
| 7                | 1                | 0              | 1.270967                | 2.071147  | -1.559453 |
| 8                | 1                | 0              | 1.135921                | 4.515076  | -1.588465 |
| 9                | 1                | 0              | -1.418725               | 4.420729  | 1.854212  |
| 10               | 1                | 0              | -1.276194               | 1.943012  | 1.879347  |
| 11               | 6                | 0              | 0.040479                | 0.342547  | 0.126698  |
| 12               | 6                | 0              | -1.077543               | -0.423248 | 0.093169  |
| 13               | 6                | 0              | 1.313214                | -0.358579 | 0.120919  |
| 14               | 1                | 0              | -0.989251               | -1.502987 | 0.102426  |
| 15               | 1                | 0              | 1.253727                | -1.456276 | 0.107410  |
| 16               | 7                | 0              | 2.440603                | 0.238975  | 0.148642  |
| 17               | 7                | 0              | -2.350326               | 0.068457  | 0.000840  |
| 18               | 1                | 0              | -2.431038               | 1.069267  | -0.131149 |
| 19               | 8                | 0              | -0.310955               | 5.972551  | 0.206886  |
| 20               | 6                | 0              | 0.374786                | 6.763696  | -0.743431 |
| 21               | 1                | 0              | 0.039812                | 6.537900  | -1.760540 |
| 22               | 1                | 0              | 0.134126                | 7.796835  | -0.504232 |
| 23               | 1                | 0              | 1.456521                | 6.615039  | -0.672194 |
| 24               | 6                | 0              | -3.532081               | -0.656715 | -0.000461 |
| 25               | 6                | 0              | -4.718982               | 0.020864  | -0.322957 |
| 26               | 6                | 0              | -3.586085               | -2.020787 | 0.319752  |
| 27               | 6                | 0              | -5.928999               | -0.643196 | -0.335795 |
| 28               | 1                | 0              | -4.680174               | 1.075795  | -0.570290 |
| 29               | 6                | 0              | -4.797949               | -2.690151 | 0.298640  |
| 30               | 1                | 0              | -2.695747               | -2.563349 | 0.605620  |
| 31               | 6                | 0              | -5.953875               | -1.998110 | -0.029607 |
| 32               | 1                | 0              | -6.849451               | -0.132120 | -0.583635 |
| 33               | 1                | 0              | -4.858361               | -3.741976 | 0.544309  |
| 34               | 6                | 0              | 3.609542                | -0.525240 | 0.079049  |
| 35               | 6                | 0              | 4.668911                | -0.195697 | 0.935036  |
| 36               | 6                | 0              | 3.773435                | -1.560602 | -0.852025 |
| 37               | 6                | 0              | 5.850976                | -0.913038 | 0.897694  |
| 38               | 1                | 0              | 4.536618                | 0.623058  | 1.630835  |
| 39               | 6                | 0              | 4.959541                | -2.275976 | -0.906280 |
| 40               | 1                | 0              | 2.977530                | -1.779700 | -1.553783 |
| 41               | 6                | 0              | 5.977068                | -1.945138 | -0.024624 |
| 42               | 1                | 0              | 6.675396                | -0.684754 | 1.559590  |
| 43               | 1                | 0              | 5.109443                | -3.072852 | -1.622114 |
| 44               | 7                | 0              | -7.235957               | -2.712544 | -0.045481 |
| 45               | 8                | 0              | -7.223438               | -3.896379 | 0.219697  |
| 46               | 8                | 0              | -8.229889               | -2.075180 | -0.324212 |
| 47               | 7                | 0              | 7.238871                | -2.701099 | -0.079199 |
| 48               | 8                | 0              | 7.327221                | -3.590791 | -0.899299 |
| 49               | 8                | 0              | 8.114723                | -2.390693 | 0.700310  |

## Structure 41c (CHCl<sub>3</sub>)

Energy (Hartrees): -1443.94031593

No imaginary frequencies

Standard orientation:

| Center<br>Number | Atomic<br>Number | Atomic<br>Type | Coordinates (Angstroms) |           |           |
|------------------|------------------|----------------|-------------------------|-----------|-----------|
|                  |                  |                | X                       | Y         | Z         |
| 1                | 6                | 0              | 0.638153                | 2.561852  | -0.857135 |
| 2                | 6                | 0              | 0.588434                | 3.952998  | -0.872857 |
| 3                | 6                | 0              | -0.122779               | 4.627861  | 0.120582  |
| 4                | 6                | 0              | -0.771668               | 3.900321  | 1.122577  |
| 5                | 6                | 0              | -0.712539               | 2.516709  | 1.123674  |
| 6                | 6                | 0              | -0.012430               | 1.820951  | 0.128300  |
| 7                | 1                | 0              | 1.196606                | 2.046487  | -1.630403 |
| 8                | 1                | 0              | 1.105739                | 4.491736  | -1.655474 |
| 9                | 1                | 0              | -1.305704               | 4.439083  | 1.896782  |
| 10               | 1                | 0              | -1.205028               | 1.964901  | 1.918643  |
| 11               | 6                | 0              | 0.033094                | 0.337240  | 0.127172  |
| 12               | 6                | 0              | -1.089874               | -0.428640 | 0.108378  |
| 13               | 6                | 0              | 1.296354                | -0.370687 | 0.126958  |
| 14               | 1                | 0              | -1.000699               | -1.508588 | 0.131773  |
| 15               | 1                | 0              | 1.230687                | -1.465367 | 0.096536  |
| 16               | 7                | 0              | 2.431648                | 0.221317  | 0.181701  |
| 17               | 7                | 0              | -2.357633               | 0.065273  | 0.028272  |
| 18               | 1                | 0              | -2.450705               | 1.068653  | -0.089242 |
| 19               | 8                | 0              | -0.235586               | 5.976272  | 0.196382  |
| 20               | 6                | 0              | 0.423643                | 6.753875  | -0.791393 |
| 21               | 1                | 0              | 0.039905                | 6.529166  | -1.790985 |
| 22               | 1                | 0              | 0.208584                | 7.792647  | -0.548354 |
| 23               | 1                | 0              | 1.504741                | 6.590137  | -0.764786 |
| 24               | 6                | 0              | -3.540338               | -0.655405 | 0.018068  |
| 25               | 6                | 0              | -4.728480               | 0.049761  | -0.239544 |
| 26               | 6                | 0              | -3.595629               | -2.036143 | 0.261582  |
| 27               | 6                | 0              | -5.942919               | -0.603563 | -0.262284 |
| 28               | 1                | 0              | -4.683807               | 1.117130  | -0.425048 |
| 29               | 6                | 0              | -4.812224               | -2.693873 | 0.233587  |
| 30               | 1                | 0              | -2.702566               | -2.601827 | 0.488530  |
| 31               | 6                | 0              | -5.971579               | -1.975434 | -0.030408 |
| 32               | 1                | 0              | -6.859180               | -0.064155 | -0.462138 |
| 33               | 1                | 0              | -4.864619               | -3.757857 | 0.422635  |
| 34               | 6                | 0              | 3.596183                | -0.545003 | 0.104252  |
| 35               | 6                | 0              | 4.681475                | -0.181897 | 0.916484  |
| 36               | 6                | 0              | 3.738127                | -1.613025 | -0.795736 |
| 37               | 6                | 0              | 5.865836                | -0.893384 | 0.868515  |
| 38               | 1                | 0              | 4.570876                | 0.659218  | 1.589970  |
| 39               | 6                | 0              | 4.924335                | -2.324751 | -0.860090 |
| 40               | 1                | 0              | 2.922719                | -1.864434 | -1.463276 |
| 41               | 6                | 0              | 5.968788                | -1.958193 | -0.021188 |
| 42               | 1                | 0              | 6.703845                | -0.629999 | 1.500059  |
| 43               | 1                | 0              | 5.047220                | -3.144613 | -1.555209 |
| 44               | 7                | 0              | -7.251792               | -2.675368 | -0.056710 |
| 45               | 8                | 0              | -7.252429               | -3.878495 | 0.125407  |
| 46               | 8                | 0              | -8.257848               | -2.022248 | -0.260156 |
| 47               | 7                | 0              | 7.224765                | -2.707848 | -0.087135 |
| 48               | 8                | 0              | 7.315269                | -3.604213 | -0.904098 |
| 49               | 8                | 0              | 8.116681                | -2.400734 | 0.679981  |

## Structure 41c (DMSO)

Energy (Hartrees): -1443.93960096

No imaginary frequencies

Standard orientation:

| Center<br>Number | Atomic<br>Number | Atomic<br>Type | Coordinates (Angstroms) |           |           |
|------------------|------------------|----------------|-------------------------|-----------|-----------|
|                  |                  |                | X                       | Y         | Z         |
| 1                | 6                | 0              | 0.645601                | 2.582954  | -0.858316 |
| 2                | 6                | 0              | 0.607800                | 3.974859  | -0.872357 |
| 3                | 6                | 0              | -0.101337               | 4.654243  | 0.120626  |
| 4                | 6                | 0              | -0.760967               | 3.928506  | 1.117564  |
| 5                | 6                | 0              | -0.712830               | 2.543936  | 1.117078  |
| 6                | 6                | 0              | -0.011941               | 1.844419  | 0.125037  |
| 7                | 1                | 0              | 1.197308                | 2.064810  | -1.635139 |
| 8                | 1                | 0              | 1.128643                | 4.509560  | -1.655608 |
| 9                | 1                | 0              | -1.299776               | 4.466505  | 1.889192  |
| 10               | 1                | 0              | -1.218846               | 1.995956  | 1.906150  |
| 11               | 6                | 0              | 0.029766                | 0.360820  | 0.121400  |
| 12               | 6                | 0              | -1.093213               | -0.408544 | 0.097065  |
| 13               | 6                | 0              | 1.286824                | -0.351609 | 0.126183  |
| 14               | 1                | 0              | -0.996143               | -1.487823 | 0.115627  |
| 15               | 1                | 0              | 1.213621                | -1.444507 | 0.082294  |
| 16               | 7                | 0              | 2.429012                | 0.232065  | 0.202338  |
| 17               | 7                | 0              | -2.359850               | 0.079412  | 0.019878  |
| 18               | 1                | 0              | -2.466163               | 1.083538  | -0.088606 |
| 19               | 8                | 0              | -0.201401               | 6.002649  | 0.197321  |
| 20               | 6                | 0              | 0.467088                | 6.770620  | -0.794604 |
| 21               | 1                | 0              | 0.081643                | 6.545927  | -1.793265 |
| 22               | 1                | 0              | 0.263614                | 7.812789  | -0.556198 |
| 23               | 1                | 0              | 1.546122                | 6.594411  | -0.768315 |
| 24               | 6                | 0              | -3.537198               | -0.650115 | 0.010170  |
| 25               | 6                | 0              | -4.729645               | 0.050354  | -0.240409 |
| 26               | 6                | 0              | -3.581979               | -2.032440 | 0.248235  |
| 27               | 6                | 0              | -5.940437               | -0.609499 | -0.259806 |
| 28               | 1                | 0              | -4.689468               | 1.118319  | -0.423039 |
| 29               | 6                | 0              | -4.794913               | -2.696366 | 0.223067  |
| 30               | 1                | 0              | -2.684645               | -2.594487 | 0.467584  |
| 31               | 6                | 0              | -5.960363               | -1.982783 | -0.031306 |
| 32               | 1                | 0              | -6.858855               | -0.071701 | -0.454360 |
| 33               | 1                | 0              | -4.836380               | -3.761357 | 0.409286  |
| 34               | 6                | 0              | 3.584380                | -0.546789 | 0.120477  |
| 35               | 6                | 0              | 4.676161                | -0.201140 | 0.932845  |
| 36               | 6                | 0              | 3.713395                | -1.612699 | -0.785292 |
| 37               | 6                | 0              | 5.853233                | -0.924099 | 0.877991  |
| 38               | 1                | 0              | 4.579338                | 0.635481  | 1.614426  |
| 39               | 6                | 0              | 4.891675                | -2.335878 | -0.856004 |
| 40               | 1                | 0              | 2.893570                | -1.856463 | -1.450469 |
| 41               | 6                | 0              | 5.943614                | -1.984946 | -0.018492 |
| 42               | 1                | 0              | 6.692807                | -0.669080 | 1.511173  |
| 43               | 1                | 0              | 4.999261                | -3.154024 | -1.555676 |
| 44               | 7                | 0              | -7.235512               | -2.688084 | -0.050075 |
| 45               | 8                | 0              | -7.229731               | -3.895075 | 0.115073  |
| 46               | 8                | 0              | -8.249978               | -2.038084 | -0.229240 |
| 47               | 7                | 0              | 7.190441                | -2.745557 | -0.093614 |
| 48               | 8                | 0              | 7.272619                | -3.635455 | -0.920240 |
| 49               | 8                | 0              | 8.088169                | -2.455978 | 0.675628  |



## Structure 41c (C<sub>2</sub>H<sub>5</sub>OH)

Energy (Hartrees): -1443.94018740

No imaginary frequencies

Standard orientation:

| Center<br>Number | Atomic<br>Number | Atomic<br>Type | Coordinates (Angstroms) |           |           |
|------------------|------------------|----------------|-------------------------|-----------|-----------|
|                  |                  |                | X                       | Y         | Z         |
| 1                | 6                | 0              | 0.602060                | 2.596349  | -0.886400 |
| 2                | 6                | 0              | 0.553776                | 3.987989  | -0.892148 |
| 3                | 6                | 0              | -0.127329               | 4.654161  | 0.127542  |
| 4                | 6                | 0              | -0.747366               | 3.921638  | 1.143215  |
| 5                | 6                | 0              | -0.688703               | 2.537343  | 1.134661  |
| 6                | 6                | 0              | -0.016162               | 1.849290  | 0.115651  |
| 7                | 1                | 0              | 1.130575                | 2.085598  | -1.684217 |
| 8                | 1                | 0              | 1.045235                | 4.531522  | -1.688234 |
| 9                | 1                | 0              | -1.263799               | 4.453898  | 1.934303  |
| 10               | 1                | 0              | -1.163811               | 1.981025  | 1.937047  |
| 11               | 6                | 0              | 0.035034                | 0.365808  | 0.102814  |
| 12               | 6                | 0              | -1.083389               | -0.408525 | 0.081548  |
| 13               | 6                | 0              | 1.296366                | -0.339227 | 0.101661  |
| 14               | 1                | 0              | -0.982342               | -1.487478 | 0.093124  |
| 15               | 1                | 0              | 1.229664                | -1.432063 | 0.048719  |
| 16               | 7                | 0              | 2.435286                | 0.248894  | 0.188207  |
| 17               | 7                | 0              | -2.353450               | 0.075964  | 0.015403  |
| 18               | 1                | 0              | -2.462580               | 1.080754  | -0.083843 |
| 19               | 8                | 0              | -0.237277               | 6.006381  | 0.214109  |
| 20               | 6                | 0              | 0.400945                | 6.788709  | -0.788641 |
| 21               | 1                | 0              | -0.009922               | 6.568284  | -1.777722 |
| 22               | 1                | 0              | 0.194858                | 7.826710  | -0.534554 |
| 23               | 1                | 0              | 1.480897                | 6.618454  | -0.787868 |
| 24               | 6                | 0              | -3.526808               | -0.657426 | 0.011853  |
| 25               | 6                | 0              | -4.725518               | 0.039528  | -0.221387 |
| 26               | 6                | 0              | -3.562370               | -2.042349 | 0.239678  |
| 27               | 6                | 0              | -5.932235               | -0.626128 | -0.238171 |
| 28               | 1                | 0              | -4.692769               | 1.109374  | -0.394321 |
| 29               | 6                | 0              | -4.770701               | -2.712648 | 0.217801  |
| 30               | 1                | 0              | -2.660644               | -2.601463 | 0.447886  |
| 31               | 6                | 0              | -5.942120               | -2.002554 | -0.022990 |
| 32               | 1                | 0              | -6.854883               | -0.090989 | -0.420149 |
| 33               | 1                | 0              | -4.804389               | -3.779420 | 0.395457  |
| 34               | 6                | 0              | 3.591603                | -0.527983 | 0.107728  |
| 35               | 6                | 0              | 4.665427                | -0.210984 | 0.954742  |
| 36               | 6                | 0              | 3.736748                | -1.566180 | -0.827592 |
| 37               | 6                | 0              | 5.839320                | -0.938069 | 0.906248  |
| 38               | 1                | 0              | 4.555995                | 0.604792  | 1.659205  |
| 39               | 6                | 0              | 4.912003                | -2.293923 | -0.892408 |
| 40               | 1                | 0              | 2.931190                | -1.783742 | -1.518985 |
| 41               | 6                | 0              | 5.944705                | -1.973833 | -0.018482 |
| 42               | 1                | 0              | 6.664452                | -0.706595 | 1.566757  |
| 43               | 1                | 0              | 5.031269                | -3.091629 | -1.613752 |
| 44               | 7                | 0              | -7.207489               | -2.713470 | -0.044742 |
| 45               | 8                | 0              | -7.199985               | -3.922018 | 0.118633  |
| 46               | 8                | 0              | -8.230367               | -2.075081 | -0.226746 |
| 47               | 7                | 0              | 7.183631                | -2.738976 | -0.081965 |
| 48               | 8                | 0              | 7.277159                | -3.625514 | -0.912332 |
| 49               | 8                | 0              | 8.077151                | -2.463747 | 0.698994  |

## Structure 41d (vacuum)

Energy (Hartrees): -1443.89284103  
 No imaginary frequencies

Standard orientation:

| Center<br>Number | Atomic<br>Number | Atomic<br>Type | Coordinates (Angstroms) |           |           |
|------------------|------------------|----------------|-------------------------|-----------|-----------|
|                  |                  |                | X                       | Y         | Z         |
| 1                | 6                | 0              | 1.277997                | 2.965815  | 0.878346  |
| 2                | 6                | 0              | 1.538759                | 4.312907  | 1.022714  |
| 3                | 6                | 0              | 0.842088                | 5.254262  | 0.256562  |
| 4                | 6                | 0              | -0.112022               | 4.823790  | -0.660863 |
| 5                | 6                | 0              | -0.362629               | 3.458577  | -0.796314 |
| 6                | 6                | 0              | 0.307414                | 2.510712  | -0.027818 |
| 7                | 1                | 0              | 1.827699                | 2.251325  | 1.477676  |
| 8                | 1                | 0              | 2.279944                | 4.671681  | 1.726242  |
| 9                | 1                | 0              | -0.651908               | 5.524660  | -1.282695 |
| 10               | 1                | 0              | -1.082342               | 3.130645  | -1.538756 |
| 11               | 6                | 0              | -0.028155               | 1.072867  | -0.138552 |
| 12               | 6                | 0              | -1.328308               | 0.697635  | -0.226406 |
| 13               | 6                | 0              | 1.014977                | 0.054249  | -0.127869 |
| 14               | 1                | 0              | 0.685029                | -0.981587 | 0.032403  |
| 15               | 1                | 0              | -1.172316               | -1.190887 | -1.027546 |
| 16               | 1                | 0              | -2.106423               | 1.442592  | -0.094910 |
| 17               | 7                | 0              | 2.256800                | 0.314520  | -0.268602 |
| 18               | 7                | 0              | -1.786494               | -0.567033 | -0.527180 |
| 19               | 8                | 0              | 1.169407                | 6.551972  | 0.473336  |
| 20               | 6                | 0              | 0.495219                | 7.535792  | -0.283581 |
| 21               | 1                | 0              | 0.895371                | 8.493236  | 0.041871  |
| 22               | 1                | 0              | 0.682715                | 7.406758  | -1.354091 |
| 23               | 1                | 0              | -0.582666               | 7.508902  | -0.095054 |
| 24               | 6                | 0              | 3.173745                | -0.734862 | -0.133777 |
| 25               | 6                | 0              | 4.234008                | -0.810391 | -1.046152 |
| 26               | 6                | 0              | 3.089548                | -1.670672 | 0.906319  |
| 27               | 6                | 0              | 5.162012                | -1.832760 | -0.957997 |
| 28               | 1                | 0              | 4.303976                | -0.060748 | -1.824232 |
| 29               | 6                | 0              | 4.023160                | -2.690154 | 1.010869  |
| 30               | 1                | 0              | 2.308051                | -1.575736 | 1.650846  |
| 31               | 6                | 0              | 5.038819                | -2.759761 | 0.070035  |
| 32               | 1                | 0              | 5.978809                | -1.920344 | -1.661583 |
| 33               | 1                | 0              | 3.979782                | -3.419805 | 1.808207  |
| 34               | 6                | 0              | -3.081414               | -1.019026 | -0.316756 |
| 35               | 6                | 0              | -3.506419               | -2.180217 | -0.980807 |
| 36               | 6                | 0              | -3.963762               | -0.355094 | 0.546177  |
| 37               | 6                | 0              | -4.789245               | -2.659403 | -0.804984 |
| 38               | 1                | 0              | -2.823973               | -2.697509 | -1.645861 |
| 39               | 6                | 0              | -5.255720               | -0.826521 | 0.712106  |
| 40               | 1                | 0              | -3.637571               | 0.507805  | 1.111249  |
| 41               | 6                | 0              | -5.654014               | -1.968771 | 0.034910  |
| 42               | 1                | 0              | -5.132648               | -3.550939 | -1.312136 |
| 43               | 1                | 0              | -5.952060               | -0.330296 | 1.374828  |
| 44               | 7                | 0              | -7.021972               | -2.470297 | 0.220461  |
| 45               | 8                | 0              | -7.752708               | -1.848306 | 0.962408  |
| 46               | 8                | 0              | -7.336844               | -3.475312 | -0.381458 |
| 47               | 7                | 0              | 6.030169                | -3.844232 | 0.172840  |
| 48               | 8                | 0              | 6.911946                | -3.879904 | -0.658704 |
| 49               | 8                | 0              | 5.902533                | -4.637737 | 1.081161  |

## Structure 41d (CHCl<sub>3</sub>)

Energy (Hartrees): -1443.93393649

No imaginary frequencies

Standard orientation:

| Center<br>Number | Atomic<br>Number | Atomic<br>Type | Coordinates (Angstroms) |           |           |
|------------------|------------------|----------------|-------------------------|-----------|-----------|
|                  |                  |                | X                       | Y         | Z         |
| 1                | 6                | 0              | 1.264827                | 2.963323  | 0.881256  |
| 2                | 6                | 0              | 1.518425                | 4.314015  | 1.022877  |
| 3                | 6                | 0              | 0.814464                | 5.250216  | 0.256161  |
| 4                | 6                | 0              | -0.141326               | 4.812085  | -0.657142 |
| 5                | 6                | 0              | -0.382662               | 3.444451  | -0.790981 |
| 6                | 6                | 0              | 0.297800                | 2.499507  | -0.025336 |
| 7                | 1                | 0              | 1.815337                | 2.254829  | 1.488153  |
| 8                | 1                | 0              | 2.258675                | 4.673793  | 1.728241  |
| 9                | 1                | 0              | -0.690585               | 5.510086  | -1.274977 |
| 10               | 1                | 0              | -1.109299               | 3.111999  | -1.525075 |
| 11               | 6                | 0              | -0.025728               | 1.056987  | -0.138001 |
| 12               | 6                | 0              | -1.329510               | 0.676127  | -0.211836 |
| 13               | 6                | 0              | 1.022024                | 0.049797  | -0.137919 |
| 14               | 1                | 0              | 0.700406                | -0.989424 | -0.000256 |
| 15               | 1                | 0              | -1.170548               | -1.232556 | -0.966876 |
| 16               | 1                | 0              | -2.105473               | 1.421312  | -0.069187 |
| 17               | 7                | 0              | 2.266951                | 0.320926  | -0.269334 |
| 18               | 7                | 0              | -1.790376               | -0.583151 | -0.500225 |
| 19               | 8                | 0              | 1.132656                | 6.551610  | 0.467766  |
| 20               | 6                | 0              | 0.435601                | 7.531325  | -0.284651 |
| 21               | 1                | 0              | 0.826438                | 8.494090  | 0.039027  |
| 22               | 1                | 0              | 0.617283                | 7.407165  | -1.356314 |
| 23               | 1                | 0              | -0.639313               | 7.491322  | -0.084326 |
| 24               | 6                | 0              | 3.188735                | -0.723078 | -0.137903 |
| 25               | 6                | 0              | 4.287198                | -0.753199 | -1.009213 |
| 26               | 6                | 0              | 3.075126                | -1.699469 | 0.863867  |
| 27               | 6                | 0              | 5.225251                | -1.765496 | -0.919803 |
| 28               | 1                | 0              | 4.382620                | 0.020990  | -1.760959 |
| 29               | 6                | 0              | 4.015622                | -2.710801 | 0.968919  |
| 30               | 1                | 0              | 2.262111                | -1.645902 | 1.578333  |
| 31               | 6                | 0              | 5.072082                | -2.732923 | 0.068442  |
| 32               | 1                | 0              | 6.068187                | -1.809049 | -1.596660 |
| 33               | 1                | 0              | 3.939088                | -3.466220 | 1.739750  |
| 34               | 6                | 0              | -3.087676               | -1.026908 | -0.299983 |
| 35               | 6                | 0              | -3.490432               | -2.214408 | -0.934204 |
| 36               | 6                | 0              | -3.992907               | -0.338605 | 0.521763  |
| 37               | 6                | 0              | -4.772974               | -2.695354 | -0.770872 |
| 38               | 1                | 0              | -2.788110               | -2.747904 | -1.565011 |
| 39               | 6                | 0              | -5.283007               | -0.814479 | 0.678363  |
| 40               | 1                | 0              | -3.690751               | 0.548970  | 1.061741  |
| 41               | 6                | 0              | -5.660660               | -1.983417 | 0.030603  |
| 42               | 1                | 0              | -5.090604               | -3.605797 | -1.261346 |
| 43               | 1                | 0              | -5.988237               | -0.293786 | 1.312510  |
| 44               | 7                | 0              | -7.020445               | -2.485859 | 0.205241  |
| 45               | 8                | 0              | -7.778900               | -1.854552 | 0.916578  |
| 46               | 8                | 0              | -7.330059               | -3.511630 | -0.370834 |
| 47               | 7                | 0              | 6.066199                | -3.804961 | 0.169280  |
| 48               | 8                | 0              | 6.966202                | -3.829613 | -0.647264 |
| 49               | 8                | 0              | 5.940705                | -4.619663 | 1.062760  |

## Structure 41d (DMSO)

Energy (Hartrees): -1443.93380009

No imaginary frequencies

Standard orientation:

| Center<br>Number | Atomic<br>Number | Atomic<br>Type | Coordinates (Angstroms) |           |           |
|------------------|------------------|----------------|-------------------------|-----------|-----------|
|                  |                  |                | X                       | Y         | Z         |
| 1                | 6                | 0              | 1.278869                | 2.958373  | 0.898354  |
| 2                | 6                | 0              | 1.547100                | 4.309262  | 1.017549  |
| 3                | 6                | 0              | 0.848957                | 5.240995  | 0.238892  |
| 4                | 6                | 0              | -0.116787               | 4.796278  | -0.661801 |
| 5                | 6                | 0              | -0.371916               | 3.428691  | -0.773337 |
| 6                | 6                | 0              | 0.304680                | 2.488345  | 0.002147  |
| 7                | 1                | 0              | 1.821691                | 2.254791  | 1.518728  |
| 8                | 1                | 0              | 2.292594                | 4.669445  | 1.717592  |
| 9                | 1                | 0              | -0.665962               | 5.488852  | -1.286035 |
| 10               | 1                | 0              | -1.110400               | 3.093439  | -1.494372 |
| 11               | 6                | 0              | -0.025478               | 1.045552  | -0.088754 |
| 12               | 6                | 0              | -1.333612               | 0.668152  | -0.142345 |
| 13               | 6                | 0              | 1.020165                | 0.039855  | -0.097900 |
| 14               | 1                | 0              | 0.706559                | -0.997231 | 0.063948  |
| 15               | 1                | 0              | -1.167433               | -1.262033 | -0.828029 |
| 16               | 1                | 0              | -2.104339               | 1.419424  | -0.004211 |
| 17               | 7                | 0              | 2.262654                | 0.311065  | -0.271797 |
| 18               | 7                | 0              | -1.797014               | -0.590841 | -0.404224 |
| 19               | 8                | 0              | 1.179792                | 6.541710  | 0.426204  |
| 20               | 6                | 0              | 0.475482                | 7.514114  | -0.333276 |
| 21               | 1                | 0              | 0.871093                | 8.480506  | -0.026637 |
| 22               | 1                | 0              | 0.645461                | 7.374774  | -1.404675 |
| 23               | 1                | 0              | -0.597254               | 7.477924  | -0.122656 |
| 24               | 6                | 0              | 3.187204                | -0.730523 | -0.144956 |
| 25               | 6                | 0              | 4.261299                | -0.781433 | -1.045923 |
| 26               | 6                | 0              | 3.101993                | -1.684886 | 0.881043  |
| 27               | 6                | 0              | 5.201997                | -1.791484 | -0.961337 |
| 28               | 1                | 0              | 4.336623                | -0.027368 | -1.820358 |
| 29               | 6                | 0              | 4.045027                | -2.693841 | 0.980973  |
| 30               | 1                | 0              | 2.306208                | -1.619685 | 1.613645  |
| 31               | 6                | 0              | 5.077072                | -2.736749 | 0.052288  |
| 32               | 1                | 0              | 6.023412                | -1.847322 | -1.663353 |
| 33               | 1                | 0              | 3.985423                | -3.431890 | 1.770057  |
| 34               | 6                | 0              | -3.102764               | -1.021613 | -0.237464 |
| 35               | 6                | 0              | -3.482395               | -2.228137 | -0.851057 |
| 36               | 6                | 0              | -4.037370               | -0.306906 | 0.527674  |
| 37               | 6                | 0              | -4.771648               | -2.701360 | -0.725521 |
| 38               | 1                | 0              | -2.754489               | -2.781588 | -1.433920 |
| 39               | 6                | 0              | -5.333258               | -0.776614 | 0.647217  |
| 40               | 1                | 0              | -3.756164               | 0.596987  | 1.051649  |
| 41               | 6                | 0              | -5.688864               | -1.964086 | 0.019082  |
| 42               | 1                | 0              | -5.068261               | -3.626128 | -1.202111 |
| 43               | 1                | 0              | -6.059356               | -0.233447 | 1.237503  |
| 44               | 7                | 0              | -7.054213               | -2.457397 | 0.153567  |
| 45               | 8                | 0              | -7.836908               | -1.812328 | 0.828077  |
| 46               | 8                | 0              | -7.350412               | -3.492454 | -0.416229 |
| 47               | 7                | 0              | 6.074266                | -3.803808 | 0.150139  |
| 48               | 8                | 0              | 6.959385                | -3.840876 | -0.684095 |
| 49               | 8                | 0              | 5.970671                | -4.605366 | 1.059812  |

## Structure 41d (C<sub>2</sub>H<sub>5</sub>OH)

Energy (Hartrees): -1443.93433898

No imaginary frequencies

Standard orientation:

| Center<br>Number | Atomic<br>Number | Atomic<br>Type | Coordinates (Angstroms) |           |           |
|------------------|------------------|----------------|-------------------------|-----------|-----------|
|                  |                  |                | X                       | Y         | Z         |
| 1                | 6                | 0              | 1.274054                | 2.959723  | 0.909481  |
| 2                | 6                | 0              | 1.544403                | 4.310412  | 1.027343  |
| 3                | 6                | 0              | 0.853904                | 5.238896  | 0.239956  |
| 4                | 6                | 0              | -0.104998               | 4.796913  | -0.667689 |
| 5                | 6                | 0              | -0.362481               | 3.429803  | -0.777562 |
| 6                | 6                | 0              | 0.305945                | 2.490857  | 0.006676  |
| 7                | 1                | 0              | 1.810507                | 2.256104  | 1.535574  |
| 8                | 1                | 0              | 2.285173                | 4.672339  | 1.731820  |
| 9                | 1                | 0              | -0.645984               | 5.490200  | -1.298291 |
| 10               | 1                | 0              | -1.094494               | 3.093496  | -1.504770 |
| 11               | 6                | 0              | -0.025679               | 1.048508  | -0.083919 |
| 12               | 6                | 0              | -1.333083               | 0.672926  | -0.143029 |
| 13               | 6                | 0              | 1.019452                | 0.041511  | -0.090206 |
| 14               | 1                | 0              | 0.706227                | -0.992847 | 0.089131  |
| 15               | 1                | 0              | -1.167639               | -1.252860 | -0.846069 |
| 16               | 1                | 0              | -2.104395               | 1.423970  | -0.007319 |
| 17               | 7                | 0              | 2.259850                | 0.308481  | -0.283114 |
| 18               | 7                | 0              | -1.796026               | -0.586442 | -0.412881 |
| 19               | 8                | 0              | 1.187443                | 6.544622  | 0.427073  |
| 20               | 6                | 0              | 0.492576                | 7.519490  | -0.341132 |
| 21               | 1                | 0              | 0.890734                | 8.484056  | -0.031983 |
| 22               | 1                | 0              | 0.672697                | 7.375002  | -1.409888 |
| 23               | 1                | 0              | -0.581131               | 7.486021  | -0.136904 |
| 24               | 6                | 0              | 3.182466                | -0.733876 | -0.153344 |
| 25               | 6                | 0              | 4.235440                | -0.812352 | -1.077180 |
| 26               | 6                | 0              | 3.115464                | -1.661748 | 0.897976  |
| 27               | 6                | 0              | 5.173519                | -1.823725 | -0.988258 |
| 28               | 1                | 0              | 4.296213                | -0.078548 | -1.872041 |
| 29               | 6                | 0              | 4.055300                | -2.672394 | 1.002505  |
| 30               | 1                | 0              | 2.336959                | -1.573185 | 1.646641  |
| 31               | 6                | 0              | 5.066470                | -2.742716 | 0.051965  |
| 32               | 1                | 0              | 5.977606                | -1.900692 | -1.708190 |
| 33               | 1                | 0              | 4.010476                | -3.389247 | 1.811835  |
| 34               | 6                | 0              | -3.099647               | -1.018412 | -0.243232 |
| 35               | 6                | 0              | -3.483288               | -2.220281 | -0.864626 |
| 36               | 6                | 0              | -4.029863               | -0.308899 | 0.533006  |
| 37               | 6                | 0              | -4.771441               | -2.693371 | -0.736824 |
| 38               | 1                | 0              | -2.759099               | -2.769646 | -1.456000 |
| 39               | 6                | 0              | -5.324498               | -0.778329 | 0.656453  |
| 40               | 1                | 0              | -3.745068               | 0.590289  | 1.063176  |
| 41               | 6                | 0              | -5.684088               | -1.961067 | 0.019829  |
| 42               | 1                | 0              | -5.070720               | -3.613997 | -1.219999 |
| 43               | 1                | 0              | -6.046692               | -0.238866 | 1.255009  |
| 44               | 7                | 0              | -7.043537               | -2.452786 | 0.157899  |
| 45               | 8                | 0              | -7.823689               | -1.822695 | 0.851473  |
| 46               | 8                | 0              | -7.353418               | -3.477027 | -0.426602 |
| 47               | 7                | 0              | 6.057410                | -3.808676 | 0.156017  |
| 48               | 8                | 0              | 6.951640                | -3.852783 | -0.669298 |
| 49               | 8                | 0              | 5.948672                | -4.614222 | 1.062815  |

**Structure 42a (vacuum)**

Energy (Hartrees): -1353.92511389  
 No imaginary frequencies

Standard orientation:

| Center<br>Number | Atomic<br>Number | Atomic<br>Type | Coordinates (Angstroms) |           |           |
|------------------|------------------|----------------|-------------------------|-----------|-----------|
|                  |                  |                | X                       | Y         | Z         |
| 1                | 6                | 0              | 3.368987                | 0.408364  | -0.721154 |
| 2                | 6                | 0              | 4.739266                | 0.206257  | -0.732959 |
| 3                | 6                | 0              | 5.261807                | -0.857443 | -0.011766 |
| 4                | 6                | 0              | 4.453488                | -1.712437 | 0.723361  |
| 5                | 6                | 0              | 3.087099                | -1.486875 | 0.737027  |
| 6                | 6                | 0              | 2.512926                | -0.432321 | 0.008735  |
| 7                | 1                | 0              | 2.951856                | 1.212270  | -1.315776 |
| 8                | 1                | 0              | 5.401866                | 0.843852  | -1.302690 |
| 9                | 1                | 0              | 4.902179                | -2.519714 | 1.286539  |
| 10               | 1                | 0              | 2.456110                | -2.119253 | 1.350592  |
| 11               | 6                | 0              | 1.056143                | -0.210362 | 0.004022  |
| 12               | 6                | 0              | 0.210585                | -1.294475 | 0.005263  |
| 13               | 6                | 0              | 0.551667                | 1.145262  | 0.002718  |
| 14               | 1                | 0              | 0.631666                | -2.295060 | -0.006603 |
| 15               | 1                | 0              | 1.302978                | 1.942130  | 0.047552  |
| 16               | 1                | 0              | -1.509518               | -0.278647 | 0.051795  |
| 17               | 7                | 0              | -0.700938               | 1.438625  | -0.026004 |
| 18               | 7                | 0              | -1.128075               | -1.228290 | 0.011901  |
| 19               | 6                | 0              | -1.091968               | 2.790141  | 0.063808  |
| 20               | 6                | 0              | -2.194161               | 3.208784  | -0.676605 |
| 21               | 6                | 0              | -0.453111               | 3.721235  | 0.894834  |
| 22               | 6                | 0              | -2.633899               | 4.528570  | -0.636418 |
| 23               | 1                | 0              | -2.700406               | 2.486385  | -1.306169 |
| 24               | 6                | 0              | -0.889409               | 5.032626  | 0.950493  |
| 25               | 1                | 0              | 0.368973                | 3.405174  | 1.526931  |
| 26               | 6                | 0              | -1.976741               | 5.448970  | 0.178715  |
| 27               | 1                | 0              | -3.484859               | 4.819182  | -1.237509 |
| 28               | 1                | 0              | -0.412487               | 5.756716  | 1.599706  |
| 29               | 6                | 0              | -1.998504               | -2.333404 | -0.054130 |
| 30               | 6                | 0              | -3.264375               | -2.227215 | 0.511619  |
| 31               | 6                | 0              | -1.637008               | -3.527079 | -0.687321 |
| 32               | 6                | 0              | -4.160415               | -3.291213 | 0.466866  |
| 33               | 1                | 0              | -3.550188               | -1.305471 | 1.005926  |
| 34               | 6                | 0              | -2.516572               | -4.593634 | -0.718356 |
| 35               | 1                | 0              | -0.677388               | -3.616518 | -1.182081 |
| 36               | 6                | 0              | -3.784021               | -4.487324 | -0.140905 |
| 37               | 1                | 0              | -5.136321               | -3.172729 | 0.917728  |
| 38               | 1                | 0              | -2.250039               | -5.522005 | -1.207967 |
| 39               | 8                | 0              | -4.573098               | -5.588724 | -0.230217 |
| 40               | 8                | 0              | -2.327440               | 6.756288  | 0.301567  |
| 41               | 6                | 0              | -5.861409               | -5.519776 | 0.344184  |
| 42               | 1                | 0              | -6.320021               | -6.491308 | 0.175137  |
| 43               | 1                | 0              | -5.803876               | -5.326981 | 1.420166  |
| 44               | 1                | 0              | -6.466374               | -4.743252 | -0.134746 |
| 45               | 6                | 0              | -3.431550               | 7.212313  | -0.450491 |
| 46               | 1                | 0              | -3.543201               | 8.268050  | -0.214097 |
| 47               | 1                | 0              | -3.253399               | 7.097057  | -1.524502 |
| 48               | 1                | 0              | -4.346448               | 6.678602  | -0.173692 |
| 49               | 7                | 0              | 6.715350                | -1.083340 | -0.023619 |
| 50               | 8                | 0              | 7.147130                | -2.005479 | 0.636453  |
| 51               | 8                | 0              | 7.396107                | -0.334738 | -0.692982 |

## Structure 42a (CHCl<sub>3</sub>)

Energy (Hartrees): -1353.95968815

No imaginary frequencies

Standard orientation:

| Center<br>Number | Atomic<br>Number | Atomic<br>Type | Coordinates (Angstroms) |           |           |
|------------------|------------------|----------------|-------------------------|-----------|-----------|
|                  |                  |                | X                       | Y         | Z         |
| 1                | 6                | 0              | 3.366491                | 0.136471  | -0.678779 |
| 2                | 6                | 0              | 4.712434                | -0.185425 | -0.707176 |
| 3                | 6                | 0              | 5.143780                | -1.313907 | -0.021357 |
| 4                | 6                | 0              | 4.264131                | -2.117070 | 0.693819  |
| 5                | 6                | 0              | 2.924166                | -1.772729 | 0.723899  |
| 6                | 6                | 0              | 2.440611                | -0.647601 | 0.032485  |
| 7                | 1                | 0              | 3.026761                | 0.995424  | -1.244714 |
| 8                | 1                | 0              | 5.418086                | 0.415840  | -1.264906 |
| 9                | 1                | 0              | 4.630626                | -2.981453 | 1.231724  |
| 10               | 1                | 0              | 2.245298                | -2.371858 | 1.318919  |
| 11               | 6                | 0              | 1.010016                | -0.297894 | 0.045450  |
| 12               | 6                | 0              | 0.073230                | -1.309108 | 0.054377  |
| 13               | 6                | 0              | 0.630935                | 1.096823  | 0.036329  |
| 14               | 1                | 0              | 0.407122                | -2.341940 | 0.032837  |
| 15               | 1                | 0              | 1.451724                | 1.821160  | 0.058274  |
| 16               | 1                | 0              | -1.569814               | -0.162759 | 0.131315  |
| 17               | 7                | 0              | -0.590838               | 1.505905  | 0.021399  |
| 18               | 7                | 0              | -1.252782               | -1.133214 | 0.072488  |
| 19               | 6                | 0              | -0.843587               | 2.892307  | 0.093371  |
| 20               | 6                | 0              | -1.915320               | 3.408473  | -0.632286 |
| 21               | 6                | 0              | -0.093252               | 3.769644  | 0.890652  |
| 22               | 6                | 0              | -2.215244               | 4.768331  | -0.613822 |
| 23               | 1                | 0              | -2.511937               | 2.733042  | -1.235666 |
| 24               | 6                | 0              | -0.389827               | 5.121416  | 0.923971  |
| 25               | 1                | 0              | 0.708950                | 3.385060  | 1.510993  |
| 26               | 6                | 0              | -1.445246               | 5.633271  | 0.164068  |
| 27               | 1                | 0              | -3.045443               | 5.134060  | -1.203533 |
| 28               | 1                | 0              | 0.180949                | 5.800923  | 1.546558  |
| 29               | 6                | 0              | -2.209656               | -2.165787 | -0.021923 |
| 30               | 6                | 0              | -3.457730               | -1.981785 | 0.564876  |
| 31               | 6                | 0              | -1.945901               | -3.356740 | -0.706124 |
| 32               | 6                | 0              | -4.434217               | -2.971526 | 0.491761  |
| 33               | 1                | 0              | -3.667245               | -1.057709 | 1.092890  |
| 34               | 6                | 0              | -2.907095               | -4.350439 | -0.766837 |
| 35               | 1                | 0              | -0.998911               | -3.501047 | -1.213119 |
| 36               | 6                | 0              | -4.156343               | -4.168920 | -0.166881 |
| 37               | 1                | 0              | -5.394143               | -2.798565 | 0.960129  |
| 38               | 1                | 0              | -2.713242               | -5.275989 | -1.296197 |
| 39               | 8                | 0              | -5.030329               | -5.201055 | -0.284341 |
| 40               | 8                | 0              | -1.653789               | 6.972833  | 0.257565  |
| 41               | 6                | 0              | -6.308956               | -5.052566 | 0.311157  |
| 42               | 1                | 0              | -6.843074               | -5.980045 | 0.114002  |
| 43               | 1                | 0              | -6.226132               | -4.905184 | 1.392173  |
| 44               | 1                | 0              | -6.856828               | -4.217020 | -0.134962 |
| 45               | 6                | 0              | -2.710362               | 7.528836  | -0.506844 |
| 46               | 1                | 0              | -2.701680               | 8.597478  | -0.300470 |
| 47               | 1                | 0              | -2.551243               | 7.364668  | -1.576935 |
| 48               | 1                | 0              | -3.676394               | 7.110631  | -0.208244 |
| 49               | 7                | 0              | 6.563693                | -1.665932 | -0.051443 |
| 50               | 8                | 0              | 6.921986                | -2.655728 | 0.558141  |
| 51               | 8                | 0              | 7.318097                | -0.953111 | -0.685526 |

## Structure 42a (DMSO)

Energy (Hartrees): -1353.95597772

No imaginary frequencies

Standard orientation:

| Center<br>Number | Atomic<br>Number | Atomic<br>Type | Coordinates (Angstroms) |           |           |
|------------------|------------------|----------------|-------------------------|-----------|-----------|
|                  |                  |                | X                       | Y         | Z         |
| 1                | 6                | 0              | 3.383234                | 0.580293  | -0.647765 |
| 2                | 6                | 0              | 4.758912                | 0.428828  | -0.670163 |
| 3                | 6                | 0              | 5.321311                | -0.666747 | -0.026281 |
| 4                | 6                | 0              | 4.541312                | -1.600394 | 0.646245  |
| 5                | 6                | 0              | 3.169211                | -1.426319 | 0.672721  |
| 6                | 6                | 0              | 2.555307                | -0.342461 | 0.017483  |
| 7                | 1                | 0              | 2.944550                | 1.414276  | -1.182388 |
| 8                | 1                | 0              | 5.386177                | 1.137678  | -1.194352 |
| 9                | 1                | 0              | 5.005212                | -2.435444 | 1.154290  |
| 10               | 1                | 0              | 2.568536                | -2.132327 | 1.233725  |
| 11               | 6                | 0              | 1.092499                | -0.176703 | 0.018986  |
| 12               | 6                | 0              | 0.292476                | -1.302254 | 0.015034  |
| 13               | 6                | 0              | 0.538284                | 1.158307  | 0.021331  |
| 14               | 1                | 0              | 0.757855                | -2.281853 | -0.003502 |
| 15               | 1                | 0              | 1.254746                | 1.982820  | 0.091718  |
| 16               | 1                | 0              | -1.479126               | -0.367604 | 0.056599  |
| 17               | 7                | 0              | -0.727068               | 1.401016  | -0.033888 |
| 18               | 7                | 0              | -1.043926               | -1.292973 | 0.016275  |
| 19               | 6                | 0              | -1.178664               | 2.733508  | 0.061655  |
| 20               | 6                | 0              | -2.318928               | 3.093456  | -0.655739 |
| 21               | 6                | 0              | -0.569868               | 3.701405  | 0.875082  |
| 22               | 6                | 0              | -2.825973               | 4.389790  | -0.612187 |
| 23               | 1                | 0              | -2.808326               | 2.345239  | -1.270089 |
| 24               | 6                | 0              | -1.073091               | 4.990278  | 0.934360  |
| 25               | 1                | 0              | 0.286530                | 3.436348  | 1.485359  |
| 26               | 6                | 0              | -2.198385               | 5.348479  | 0.184474  |
| 27               | 1                | 0              | -3.704806               | 4.632516  | -1.195152 |
| 28               | 1                | 0              | -0.611282               | 5.735985  | 1.571861  |
| 29               | 6                | 0              | -1.884522               | -2.422661 | -0.030750 |
| 30               | 6                | 0              | -3.215442               | -2.264935 | 0.346125  |
| 31               | 6                | 0              | -1.442113               | -3.679379 | -0.457433 |
| 32               | 6                | 0              | -4.102446               | -3.337233 | 0.315464  |
| 33               | 1                | 0              | -3.563988               | -1.290955 | 0.673736  |
| 34               | 6                | 0              | -2.318580               | -4.751228 | -0.477761 |
| 35               | 1                | 0              | -0.422928               | -3.828272 | -0.792464 |
| 36               | 6                | 0              | -3.653053               | -4.593283 | -0.092116 |
| 37               | 1                | 0              | -5.129451               | -3.176812 | 0.615765  |
| 38               | 1                | 0              | -1.981992               | -5.726458 | -0.810304 |
| 39               | 8                | 0              | -4.431469               | -5.702711 | -0.153113 |
| 40               | 8                | 0              | -2.614003               | 6.634655  | 0.304803  |
| 41               | 6                | 0              | -5.801089               | -5.558476 | 0.194246  |
| 42               | 1                | 0              | -6.250702               | -6.541568 | 0.068325  |
| 43               | 1                | 0              | -5.913712               | -5.239017 | 1.234239  |
| 44               | 1                | 0              | -6.300825               | -4.843716 | -0.466172 |
| 45               | 6                | 0              | -3.746782               | 7.031005  | -0.454707 |
| 46               | 1                | 0              | -3.905148               | 8.084937  | -0.234114 |
| 47               | 1                | 0              | -3.564662               | 6.908147  | -1.526394 |
| 48               | 1                | 0              | -4.635840               | 6.463316  | -0.164724 |
| 49               | 7                | 0              | 6.771745                | -0.842254 | -0.056428 |
| 50               | 8                | 0              | 7.245331                | -1.817002 | 0.498882  |
| 51               | 8                | 0              | 7.440422                | -0.007117 | -0.637758 |



## Structure 42a (C<sub>2</sub>H<sub>5</sub>OH)

Energy (Hartrees): -1353.95809644

No imaginary frequencies

Standard orientation:

| Center<br>Number | Atomic<br>Number | Atomic<br>Type | Coordinates (Angstroms) |           |           |
|------------------|------------------|----------------|-------------------------|-----------|-----------|
|                  |                  |                | X                       | Y         | Z         |
| 1                | 6                | 0              | 3.377829                | 0.517012  | -0.650165 |
| 2                | 6                | 0              | 4.749561                | 0.340819  | -0.677795 |
| 3                | 6                | 0              | 5.294642                | -0.760356 | -0.027100 |
| 4                | 6                | 0              | 4.501222                | -1.676319 | 0.655754  |
| 5                | 6                | 0              | 3.133128                | -1.478155 | 0.684710  |
| 6                | 6                | 0              | 2.536375                | -0.387209 | 0.024512  |
| 7                | 1                | 0              | 2.951272                | 1.354332  | -1.189470 |
| 8                | 1                | 0              | 5.386699                | 1.033914  | -1.211203 |
| 9                | 1                | 0              | 4.951798                | -2.515579 | 1.169219  |
| 10               | 1                | 0              | 2.521383                | -2.168957 | 1.252805  |
| 11               | 6                | 0              | 1.077959                | -0.194851 | 0.028247  |
| 12               | 6                | 0              | 0.258058                | -1.305711 | 0.024734  |
| 13               | 6                | 0              | 0.549358                | 1.150551  | 0.027546  |
| 14               | 1                | 0              | 0.705565                | -2.293604 | 0.010107  |
| 15               | 1                | 0              | 1.281723                | 1.960906  | 0.099484  |
| 16               | 1                | 0              | -1.499435               | -0.342722 | 0.056988  |
| 17               | 7                | 0              | -0.710409               | 1.418870  | -0.031326 |
| 18               | 7                | 0              | -1.077962               | -1.274207 | 0.020151  |
| 19               | 6                | 0              | -1.130568               | 2.762216  | 0.062565  |
| 20               | 6                | 0              | -2.245541               | 3.155950  | -0.676504 |
| 21               | 6                | 0              | -0.514751               | 3.707385  | 0.896310  |
| 22               | 6                | 0              | -2.720797               | 4.464082  | -0.632751 |
| 23               | 1                | 0              | -2.739954               | 2.425637  | -1.308133 |
| 24               | 6                | 0              | -0.986460               | 5.008463  | 0.955371  |
| 25               | 1                | 0              | 0.320659                | 3.415636  | 1.523300  |
| 26               | 6                | 0              | -2.085507               | 5.398045  | 0.184948  |
| 27               | 1                | 0              | -3.580657               | 4.734298  | -1.231737 |
| 28               | 1                | 0              | -0.520422               | 5.738241  | 1.608368  |
| 29               | 6                | 0              | -1.933023               | -2.393359 | -0.031322 |
| 30               | 6                | 0              | -3.258614               | -2.225395 | 0.359204  |
| 31               | 6                | 0              | -1.507006               | -3.649094 | -0.476203 |
| 32               | 6                | 0              | -4.156662               | -3.288277 | 0.325610  |
| 33               | 1                | 0              | -3.594423               | -1.251584 | 0.700370  |
| 34               | 6                | 0              | -2.394191               | -4.712071 | -0.499264 |
| 35               | 1                | 0              | -0.492783               | -3.803689 | -0.823894 |
| 36               | 6                | 0              | -3.721731               | -4.542754 | -0.098615 |
| 37               | 1                | 0              | -5.179389               | -3.121909 | 0.637256  |
| 38               | 1                | 0              | -2.071452               | -5.687664 | -0.844822 |
| 39               | 8                | 0              | -4.514334               | -5.648727 | -0.162314 |
| 40               | 8                | 0              | -2.473257               | 6.698893  | 0.307499  |
| 41               | 6                | 0              | -5.881046               | -5.497702 | 0.200772  |
| 42               | 1                | 0              | -6.336905               | -6.477378 | 0.070350  |
| 43               | 1                | 0              | -5.977555               | -5.187173 | 1.244754  |
| 44               | 1                | 0              | -6.379875               | -4.773859 | -0.449790 |
| 45               | 6                | 0              | -3.587782               | 7.129035  | -0.464008 |
| 46               | 1                | 0              | -3.723865               | 8.184001  | -0.233426 |
| 47               | 1                | 0              | -3.391472               | 7.012246  | -1.533541 |
| 48               | 1                | 0              | -4.490892               | 6.576948  | -0.188997 |
| 49               | 7                | 0              | 6.736469                | -0.959771 | -0.060557 |
| 50               | 8                | 0              | 7.202078                | -1.933331 | 0.505822  |
| 51               | 8                | 0              | 7.422582                | -0.146847 | -0.655407 |

**Structure 42b (vacuum)**

Energy (Hartrees): -1353.91565026  
 No imaginary frequencies

Standard orientation:

| Center<br>Number | Atomic<br>Number | Atomic<br>Type | Coordinates (Angstroms) |           |           |
|------------------|------------------|----------------|-------------------------|-----------|-----------|
|                  |                  |                | X                       | Y         | Z         |
| 1                | 6                | 0              | 0.345761                | 2.908427  | -0.779779 |
| 2                | 6                | 0              | -0.034750               | 4.240879  | -0.816555 |
| 3                | 6                | 0              | -1.096514               | 4.650216  | -0.023530 |
| 4                | 6                | 0              | -1.773492               | 3.773913  | 0.812301  |
| 5                | 6                | 0              | -1.376024               | 2.446805  | 0.842037  |
| 6                | 6                | 0              | -0.318565               | 1.984762  | 0.041105  |
| 7                | 1                | 0              | 1.158924                | 2.570258  | -1.411640 |
| 8                | 1                | 0              | 0.465635                | 4.958255  | -1.453022 |
| 9                | 1                | 0              | -2.579962               | 4.140486  | 1.432975  |
| 10               | 1                | 0              | -1.866709               | 1.760938  | 1.523527  |
| 11               | 6                | 0              | 0.109141                | 0.574245  | 0.072168  |
| 12               | 6                | 0              | -0.762997               | -0.471140 | 0.064400  |
| 13               | 6                | 0              | 1.541839                | 0.278495  | 0.073038  |
| 14               | 1                | 0              | 2.201770                | 1.131963  | 0.278218  |
| 15               | 1                | 0              | -0.344834               | -1.471395 | 0.116298  |
| 16               | 7                | 0              | 2.016870                | -0.886827 | -0.138506 |
| 17               | 7                | 0              | -2.109615               | -0.399056 | -0.066070 |
| 18               | 1                | 0              | -2.512552               | 0.494056  | -0.315162 |
| 19               | 6                | 0              | -2.994317               | -1.492192 | 0.001185  |
| 20               | 6                | 0              | -4.221460               | -1.416512 | -0.648034 |
| 21               | 6                | 0              | -2.680041               | -2.647660 | 0.724747  |
| 22               | 6                | 0              | -5.127794               | -2.471755 | -0.592785 |
| 23               | 1                | 0              | -4.474394               | -0.527694 | -1.216320 |
| 24               | 6                | 0              | -3.568745               | -3.706119 | 0.764446  |
| 25               | 1                | 0              | -1.749664               | -2.713212 | 1.275143  |
| 26               | 6                | 0              | -4.799135               | -3.629979 | 0.107999  |
| 27               | 1                | 0              | -6.073335               | -2.375996 | -1.108650 |
| 28               | 1                | 0              | -3.336148               | -4.605673 | 1.320719  |
| 29               | 6                | 0              | 3.402301                | -1.092727 | 0.003020  |
| 30               | 6                | 0              | 4.179858                | -0.470572 | 0.990876  |
| 31               | 6                | 0              | 4.024668                | -1.991875 | -0.859412 |
| 32               | 6                | 0              | 5.538834                | -0.714225 | 1.078434  |
| 33               | 1                | 0              | 3.707248                | 0.182755  | 1.715585  |
| 34               | 6                | 0              | 5.393259                | -2.233570 | -0.788944 |
| 35               | 1                | 0              | 3.419222                | -2.494930 | -1.603939 |
| 36               | 6                | 0              | 6.157897                | -1.588528 | 0.182598  |
| 37               | 1                | 0              | 6.145599                | -0.248745 | 1.845549  |
| 38               | 1                | 0              | 5.842223                | -2.927412 | -1.486801 |
| 39               | 8                | 0              | 7.497080                | -1.759214 | 0.347374  |
| 40               | 8                | 0              | -5.601992               | -4.720217 | 0.217076  |
| 41               | 6                | 0              | 8.155335                | -2.651869 | -0.525152 |
| 42               | 1                | 0              | 8.069750                | -2.323455 | -1.566031 |
| 43               | 1                | 0              | 9.202281                | -2.646751 | -0.229842 |
| 44               | 1                | 0              | 7.755348                | -3.666416 | -0.429221 |
| 45               | 6                | 0              | -6.855732               | -4.676682 | -0.430940 |
| 46               | 1                | 0              | -6.737364               | -4.549907 | -1.511900 |
| 47               | 1                | 0              | -7.333474               | -5.632741 | -0.229717 |
| 48               | 1                | 0              | -7.478278               | -3.868172 | -0.034260 |
| 49               | 7                | 0              | -1.515596               | 6.062349  | -0.064904 |
| 50               | 8                | 0              | -2.462004               | 6.387031  | 0.620640  |
| 51               | 8                | 0              | -0.890442               | 6.812965  | -0.783151 |

## Structure 42b (CHCl<sub>3</sub>)

Energy (Hartrees): -1353.95230340

No imaginary frequencies

Standard orientation:

| Center<br>Number | Atomic<br>Number | Atomic<br>Type | Coordinates (Angstroms) |           |           |
|------------------|------------------|----------------|-------------------------|-----------|-----------|
|                  |                  |                | X                       | Y         | Z         |
| 1                | 6                | 0              | 0.442061                | 2.905638  | -0.764587 |
| 2                | 6                | 0              | 0.119460                | 4.252615  | -0.791462 |
| 3                | 6                | 0              | -0.950647               | 4.694426  | -0.024806 |
| 4                | 6                | 0              | -1.693177               | 3.832191  | 0.772004  |
| 5                | 6                | 0              | -1.353520               | 2.489931  | 0.791440  |
| 6                | 6                | 0              | -0.286493               | 1.996781  | 0.020526  |
| 7                | 1                | 0              | 1.261744                | 2.548245  | -1.377383 |
| 8                | 1                | 0              | 0.677292                | 4.949243  | -1.403020 |
| 9                | 1                | 0              | -2.505831               | 4.212604  | 1.376435  |
| 10               | 1                | 0              | -1.902751               | 1.820257  | 1.443589  |
| 11               | 6                | 0              | 0.096320                | 0.574155  | 0.053188  |
| 12               | 6                | 0              | -0.802545               | -0.455873 | 0.061321  |
| 13               | 6                | 0              | 1.517834                | 0.243034  | 0.058567  |
| 14               | 1                | 0              | 2.196165                | 1.074482  | 0.286925  |
| 15               | 1                | 0              | -0.406807               | -1.463230 | 0.142371  |
| 16               | 7                | 0              | 1.974360                | -0.929449 | -0.177345 |
| 17               | 7                | 0              | -2.140745               | -0.366392 | -0.074027 |
| 18               | 1                | 0              | -2.540854               | 0.525235  | -0.341015 |
| 19               | 6                | 0              | -3.041949               | -1.447262 | 0.004093  |
| 20               | 6                | 0              | -4.274656               | -1.343857 | -0.633073 |
| 21               | 6                | 0              | -2.739799               | -2.611527 | 0.718483  |
| 22               | 6                | 0              | -5.197096               | -2.385236 | -0.579909 |
| 23               | 1                | 0              | -4.517007               | -0.443854 | -1.188516 |
| 24               | 6                | 0              | -3.646552               | -3.656414 | 0.757059  |
| 25               | 1                | 0              | -1.804848               | -2.700035 | 1.258621  |
| 26               | 6                | 0              | -4.880497               | -3.555066 | 0.109274  |
| 27               | 1                | 0              | -6.146386               | -2.270714 | -1.086185 |
| 28               | 1                | 0              | -3.419220               | -4.562225 | 1.306851  |
| 29               | 6                | 0              | 3.354345                | -1.164656 | -0.016849 |
| 30               | 6                | 0              | 4.125222                | -0.584221 | 1.001975  |
| 31               | 6                | 0              | 3.977792                | -2.053099 | -0.892221 |
| 32               | 6                | 0              | 5.478904                | -0.856698 | 1.106962  |
| 33               | 1                | 0              | 3.653646                | 0.062710  | 1.733595  |
| 34               | 6                | 0              | 5.340299                | -2.324886 | -0.802811 |
| 35               | 1                | 0              | 3.382261                | -2.526833 | -1.664809 |
| 36               | 6                | 0              | 6.099031                | -1.719745 | 0.199547  |
| 37               | 1                | 0              | 6.075767                | -0.418150 | 1.898592  |
| 38               | 1                | 0              | 5.790168                | -3.009366 | -1.509994 |
| 39               | 8                | 0              | 7.431257                | -1.920646 | 0.380650  |
| 40               | 8                | 0              | -5.701334               | -4.632695 | 0.211810  |
| 41               | 6                | 0              | 8.091058                | -2.803204 | -0.511025 |
| 42               | 1                | 0              | 8.027713                | -2.443716 | -1.542468 |
| 43               | 1                | 0              | 9.134103                | -2.820510 | -0.200351 |
| 44               | 1                | 0              | 7.677373                | -3.814076 | -0.445414 |
| 45               | 6                | 0              | -6.972326               | -4.551147 | -0.411350 |
| 46               | 1                | 0              | -6.874374               | -4.409728 | -1.491918 |
| 47               | 1                | 0              | -7.466042               | -5.501326 | -0.216917 |
| 48               | 1                | 0              | -7.568499               | -3.738480 | 0.014939  |
| 49               | 7                | 0              | -1.304448               | 6.117402  | -0.050824 |
| 50               | 8                | 0              | -2.265192               | 6.479096  | 0.600210  |
| 51               | 8                | 0              | -0.620502               | 6.864652  | -0.722249 |

## Structure 42b (DMSO)

Energy (Hartrees): -1353.94945012

No imaginary frequencies

Standard orientation:

| Center<br>Number | Atomic<br>Number | Atomic<br>Type | Coordinates (Angstroms) |           |           |
|------------------|------------------|----------------|-------------------------|-----------|-----------|
|                  |                  |                | X                       | Y         | Z         |
| 1                | 6                | 0              | 0.511916                | 2.884464  | -0.747967 |
| 2                | 6                | 0              | 0.225457                | 4.239191  | -0.773176 |
| 3                | 6                | 0              | -0.849498               | 4.704375  | -0.026862 |
| 4                | 6                | 0              | -1.634721               | 3.855404  | 0.743568  |
| 5                | 6                | 0              | -1.333210               | 2.504082  | 0.759017  |
| 6                | 6                | 0              | -0.258695               | 1.989107  | 0.013016  |
| 7                | 1                | 0              | 1.338434                | 2.512633  | -1.342592 |
| 8                | 1                | 0              | 0.818090                | 4.921934  | -1.367579 |
| 9                | 1                | 0              | -2.454825               | 4.248071  | 1.329974  |
| 10               | 1                | 0              | -1.922256               | 1.847271  | 1.388949  |
| 11               | 6                | 0              | 0.094552                | 0.559222  | 0.046466  |
| 12               | 6                | 0              | -0.822511               | -0.457876 | 0.058852  |
| 13               | 6                | 0              | 1.508568                | 0.205890  | 0.055679  |
| 14               | 1                | 0              | 2.197917                | 1.025428  | 0.290877  |
| 15               | 1                | 0              | -0.443415               | -1.470208 | 0.154961  |
| 16               | 7                | 0              | 1.952950                | -0.972236 | -0.187654 |
| 17               | 7                | 0              | -2.155514               | -0.349969 | -0.082277 |
| 18               | 1                | 0              | -2.546847               | 0.545874  | -0.352535 |
| 19               | 6                | 0              | -3.074749               | -1.414628 | 0.000158  |
| 20               | 6                | 0              | -4.321096               | -1.269155 | -0.602948 |
| 21               | 6                | 0              | -2.781654               | -2.600432 | 0.682007  |
| 22               | 6                | 0              | -5.266388               | -2.289891 | -0.549505 |
| 23               | 1                | 0              | -4.555746               | -0.348734 | -1.127690 |
| 24               | 6                | 0              | -3.713301               | -3.624115 | 0.722222  |
| 25               | 1                | 0              | -1.836427               | -2.725228 | 1.196333  |
| 26               | 6                | 0              | -4.960629               | -3.481840 | 0.107496  |
| 27               | 1                | 0              | -6.225010               | -2.141025 | -1.029010 |
| 28               | 1                | 0              | -3.491250               | -4.545066 | 1.248906  |
| 29               | 6                | 0              | 3.330742                | -1.219795 | -0.020792 |
| 30               | 6                | 0              | 4.103263                | -0.641523 | 0.998619  |
| 31               | 6                | 0              | 3.951309                | -2.116751 | -0.890479 |
| 32               | 6                | 0              | 5.454503                | -0.925116 | 1.109294  |
| 33               | 1                | 0              | 3.636359                | 0.015622  | 1.724202  |
| 34               | 6                | 0              | 5.311601                | -2.400181 | -0.795233 |
| 35               | 1                | 0              | 3.358241                | -2.589117 | -1.666271 |
| 36               | 6                | 0              | 6.072606                | -1.796930 | 0.207504  |
| 37               | 1                | 0              | 6.049216                | -0.485394 | 1.902164  |
| 38               | 1                | 0              | 5.757694                | -3.090751 | -1.499135 |
| 39               | 8                | 0              | 7.400841                | -2.007360 | 0.391998  |
| 40               | 8                | 0              | -5.804275               | -4.540396 | 0.207411  |
| 41               | 6                | 0              | 8.053788                | -2.895754 | -0.502841 |
| 42               | 1                | 0              | 7.987541                | -2.537035 | -1.534078 |
| 43               | 1                | 0              | 9.097912                | -2.918398 | -0.196314 |
| 44               | 1                | 0              | 7.634190                | -3.903732 | -0.435184 |
| 45               | 6                | 0              | -7.084808               | -4.412403 | -0.393174 |
| 46               | 1                | 0              | -7.000517               | -4.246691 | -1.471280 |
| 47               | 1                | 0              | -7.599786               | -5.354069 | -0.212837 |
| 48               | 1                | 0              | -7.652326               | -3.594655 | 0.060875  |
| 49               | 7                | 0              | -1.159523               | 6.136014  | -0.046074 |
| 50               | 8                | 0              | -2.077206               | 6.533722  | 0.646759  |
| 51               | 8                | 0              | -0.483715               | 6.859602  | -0.753195 |

## Structure 42b (C<sub>2</sub>H<sub>5</sub>OH)

Energy (Hartrees): -1353.95162125

No imaginary frequencies

Standard orientation:

| Center<br>Number | Atomic<br>Number | Atomic<br>Type | Coordinates (Angstroms) |           |           |
|------------------|------------------|----------------|-------------------------|-----------|-----------|
|                  |                  |                | X                       | Y         | Z         |
| 1                | 6                | 0              | 0.513064                | 2.891099  | -0.720230 |
| 2                | 6                | 0              | 0.220671                | 4.243486  | -0.756672 |
| 3                | 6                | 0              | -0.867715               | 4.706499  | -0.027430 |
| 4                | 6                | 0              | -1.656513               | 3.858817  | 0.741792  |
| 5                | 6                | 0              | -1.345731               | 2.510501  | 0.771707  |
| 6                | 6                | 0              | -0.262039               | 1.995966  | 0.037651  |
| 7                | 1                | 0              | 1.345931                | 2.519527  | -1.306175 |
| 8                | 1                | 0              | 0.815707                | 4.924958  | -1.350260 |
| 9                | 1                | 0              | -2.483981               | 4.250831  | 1.318352  |
| 10               | 1                | 0              | -1.934610               | 1.855355  | 1.403590  |
| 11               | 6                | 0              | 0.093222                | 0.568008  | 0.075945  |
| 12               | 6                | 0              | -0.822028               | -0.451040 | 0.086177  |
| 13               | 6                | 0              | 1.507799                | 0.215771  | 0.079911  |
| 14               | 1                | 0              | 2.197357                | 1.034244  | 0.317578  |
| 15               | 1                | 0              | -0.440284               | -1.462497 | 0.180648  |
| 16               | 7                | 0              | 1.951608                | -0.960619 | -0.171764 |
| 17               | 7                | 0              | -2.155010               | -0.348264 | -0.059241 |
| 18               | 1                | 0              | -2.549898               | 0.546099  | -0.328949 |
| 19               | 6                | 0              | -3.067831               | -1.419649 | 0.014142  |
| 20               | 6                | 0              | -4.307340               | -1.284787 | -0.605138 |
| 21               | 6                | 0              | -2.773553               | -2.600566 | 0.703311  |
| 22               | 6                | 0              | -5.244778               | -2.312995 | -0.561783 |
| 23               | 1                | 0              | -4.542602               | -0.368073 | -1.136024 |
| 24               | 6                | 0              | -3.697146               | -3.631982 | 0.733749  |
| 25               | 1                | 0              | -1.834447               | -2.715195 | 1.231207  |
| 26               | 6                | 0              | -4.935487               | -3.499305 | 0.101349  |
| 27               | 1                | 0              | -6.198400               | -2.174257 | -1.054053 |
| 28               | 1                | 0              | -3.476102               | -4.550720 | 1.265222  |
| 29               | 6                | 0              | 3.330988                | -1.207013 | -0.014082 |
| 30               | 6                | 0              | 4.106418                | -0.639071 | 1.008190  |
| 31               | 6                | 0              | 3.948070                | -2.093568 | -0.896795 |
| 32               | 6                | 0              | 5.458825                | -0.922049 | 1.109710  |
| 33               | 1                | 0              | 3.641373                | 0.008427  | 1.743644  |
| 34               | 6                | 0              | 5.308750                | -2.376758 | -0.810613 |
| 35               | 1                | 0              | 3.351823                | -2.558406 | -1.674698 |
| 36               | 6                | 0              | 6.070861                | -1.783257 | 0.195419  |
| 37               | 1                | 0              | 6.057808                | -0.490776 | 1.904344  |
| 38               | 1                | 0              | 5.753210                | -3.059389 | -1.523209 |
| 39               | 8                | 0              | 7.405673                | -1.995895 | 0.372336  |
| 40               | 8                | 0              | -5.773868               | -4.569774 | 0.191056  |
| 41               | 6                | 0              | 8.055829                | -2.884324 | -0.527242 |
| 42               | 1                | 0              | 7.989132                | -2.519235 | -1.555834 |
| 43               | 1                | 0              | 9.099677                | -2.910557 | -0.219961 |
| 44               | 1                | 0              | 7.630977                | -3.889841 | -0.460529 |
| 45               | 6                | 0              | -7.050680               | -4.455934 | -0.424387 |
| 46               | 1                | 0              | -6.953241               | -4.291190 | -1.501121 |
| 47               | 1                | 0              | -7.556009               | -5.403510 | -0.247574 |
| 48               | 1                | 0              | -7.629321               | -3.643496 | 0.024307  |
| 49               | 7                | 0              | -1.189932               | 6.129698  | -0.067223 |
| 50               | 8                | 0              | -2.167836               | 6.520172  | 0.544464  |
| 51               | 8                | 0              | -0.468058               | 6.868607  | -0.711730 |

## Structure 42c (vacuum)

Energy (Hartrees): -1353.91729647  
 No imaginary frequencies

Standard orientation:

| Center<br>Number | Atomic<br>Number | Atomic<br>Type | Coordinates (Angstroms) |           |           |
|------------------|------------------|----------------|-------------------------|-----------|-----------|
|                  |                  |                | X                       | Y         | Z         |
| 1                | 6                | 0              | -0.800598               | 2.240807  | 0.879437  |
| 2                | 6                | 0              | -0.772187               | 3.626288  | 0.903110  |
| 3                | 6                | 0              | 0.038728                | 4.291470  | -0.005155 |
| 4                | 6                | 0              | 0.811394                | 3.619361  | -0.939019 |
| 5                | 6                | 0              | 0.773861                | 2.232514  | -0.947557 |
| 6                | 6                | 0              | -0.020234               | 1.523727  | -0.036086 |
| 7                | 1                | 0              | -1.438316               | 1.702785  | 1.567381  |
| 8                | 1                | 0              | -1.363474               | 4.194682  | 1.608146  |
| 9                | 1                | 0              | 1.412482                | 4.179313  | -1.642497 |
| 10               | 1                | 0              | 1.347592                | 1.688689  | -1.689974 |
| 11               | 6                | 0              | -0.033244               | 0.043761  | -0.049851 |
| 12               | 6                | 0              | 1.110598                | -0.691380 | -0.053935 |
| 13               | 6                | 0              | -1.288094               | -0.693269 | -0.022174 |
| 14               | 1                | 0              | 1.035997                | -1.774298 | -0.076380 |
| 15               | 1                | 0              | -1.185657               | -1.787458 | -0.049810 |
| 16               | 7                | 0              | -2.434038               | -0.135625 | 0.005835  |
| 17               | 7                | 0              | 2.381442                | -0.216617 | 0.022414  |
| 18               | 1                | 0              | 2.503781                | 0.765921  | 0.225985  |
| 19               | 6                | 0              | 3.543183                | -1.009652 | -0.034352 |
| 20               | 6                | 0              | 4.694735                | -0.591615 | 0.623179  |
| 21               | 6                | 0              | 3.574772                | -2.205206 | -0.760085 |
| 22               | 6                | 0              | 5.862858                | -1.347917 | 0.573318  |
| 23               | 1                | 0              | 4.681650                | 0.330932  | 1.193452  |
| 24               | 6                | 0              | 4.725617                | -2.971361 | -0.792865 |
| 25               | 1                | 0              | 2.707017                | -2.524746 | -1.324452 |
| 26               | 6                | 0              | 5.879287                | -2.551680 | -0.127547 |
| 27               | 1                | 0              | 6.739848                | -0.990316 | 1.095219  |
| 28               | 1                | 0              | 4.761470                | -3.897829 | -1.352412 |
| 29               | 6                | 0              | -3.581672               | -0.949497 | 0.071026  |
| 30               | 6                | 0              | -4.718740               | -0.544880 | -0.623363 |
| 31               | 6                | 0              | -3.651827               | -2.120989 | 0.838998  |
| 32               | 6                | 0              | -5.884820               | -1.304839 | -0.606336 |
| 33               | 1                | 0              | -4.674671               | 0.375278  | -1.193728 |
| 34               | 6                | 0              | -4.810820               | -2.875640 | 0.874724  |
| 35               | 1                | 0              | -2.801285               | -2.421580 | 1.440744  |
| 36               | 6                | 0              | -5.932337               | -2.479767 | 0.142958  |
| 37               | 1                | 0              | -6.742868               | -0.965935 | -1.170991 |
| 38               | 1                | 0              | -4.878326               | -3.774038 | 1.476200  |
| 39               | 8                | 0              | 6.957706                | -3.370942 | -0.229310 |
| 40               | 8                | 0              | -7.021316               | -3.289658 | 0.237065  |
| 41               | 6                | 0              | 8.145192                | -2.974910 | 0.424190  |
| 42               | 1                | 0              | 7.991474                | -2.888340 | 1.504618  |
| 43               | 1                | 0              | 8.874716                | -3.756544 | 0.225493  |
| 44               | 1                | 0              | 8.515809                | -2.023273 | 0.029892  |
| 45               | 6                | 0              | -8.185272               | -2.903451 | -0.461104 |
| 46               | 1                | 0              | -8.001848               | -2.851756 | -1.539144 |
| 47               | 1                | 0              | -8.928640               | -3.671455 | -0.258931 |
| 48               | 1                | 0              | -8.556495               | -1.936025 | -0.107846 |
| 49               | 7                | 0              | 0.075797                | 5.766144  | 0.017514  |
| 50               | 8                | 0              | 0.782370                | 6.322672  | -0.796400 |
| 51               | 8                | 0              | -0.599377               | 6.332605  | 0.849850  |

## Structure 42c (CHCl<sub>3</sub>)

Energy (Hartrees): -1353.95464051

No imaginary frequencies

Standard orientation:

| Center<br>Number | Atomic<br>Number | Atomic<br>Type | Coordinates (Angstroms) |           |           |
|------------------|------------------|----------------|-------------------------|-----------|-----------|
|                  |                  |                | X                       | Y         | Z         |
| 1                | 6                | 0              | -0.782078               | 2.246634  | 0.924012  |
| 2                | 6                | 0              | -0.759487               | 3.631632  | 0.925947  |
| 3                | 6                | 0              | 0.035676                | 4.283782  | -0.007583 |
| 4                | 6                | 0              | 0.800073                | 3.597995  | -0.940311 |
| 5                | 6                | 0              | 0.767520                | 2.211453  | -0.925640 |
| 6                | 6                | 0              | -0.014359               | 1.515683  | 0.006884  |
| 7                | 1                | 0              | -1.400897               | 1.721943  | 1.640112  |
| 8                | 1                | 0              | -1.343907               | 4.201422  | 1.635843  |
| 9                | 1                | 0              | 1.394024                | 4.138959  | -1.664726 |
| 10               | 1                | 0              | 1.338857                | 1.660894  | -1.665026 |
| 11               | 6                | 0              | -0.033880               | 0.035805  | 0.016608  |
| 12               | 6                | 0              | 1.106084                | -0.715415 | 0.014180  |
| 13               | 6                | 0              | -1.289511               | -0.690859 | 0.040356  |
| 14               | 1                | 0              | 1.012043                | -1.796842 | -0.003342 |
| 15               | 1                | 0              | -1.192640               | -1.783644 | 0.076526  |
| 16               | 7                | 0              | -2.437841               | -0.128924 | -0.010841 |
| 17               | 7                | 0              | 2.375393                | -0.255224 | 0.074405  |
| 18               | 1                | 0              | 2.518310                | 0.732861  | 0.245156  |
| 19               | 6                | 0              | 3.537935                | -1.046887 | 0.000715  |
| 20               | 6                | 0              | 4.723584                | -0.555569 | 0.539857  |
| 21               | 6                | 0              | 3.543187                | -2.299261 | -0.622576 |
| 22               | 6                | 0              | 5.901167                | -1.296098 | 0.476425  |
| 23               | 1                | 0              | 4.728415                | 0.415738  | 1.023351  |
| 24               | 6                | 0              | 4.707895                | -3.046245 | -0.671007 |
| 25               | 1                | 0              | 2.647432                | -2.687509 | -1.091910 |
| 26               | 6                | 0              | 5.895284                | -2.553881 | -0.124267 |
| 27               | 1                | 0              | 6.804462                | -0.882482 | 0.904819  |
| 28               | 1                | 0              | 4.720373                | -4.016418 | -1.153760 |
| 29               | 6                | 0              | -3.589210               | -0.938682 | 0.057325  |
| 30               | 6                | 0              | -4.703897               | -0.572148 | -0.695977 |
| 31               | 6                | 0              | -3.688626               | -2.068402 | 0.883888  |
| 32               | 6                | 0              | -5.874123               | -1.327087 | -0.675342 |
| 33               | 1                | 0              | -4.644194               | 0.314719  | -1.317075 |
| 34               | 6                | 0              | -4.852134               | -2.818372 | 0.921916  |
| 35               | 1                | 0              | -2.856189               | -2.343935 | 1.522096  |
| 36               | 6                | 0              | -5.950201               | -2.459620 | 0.135516  |
| 37               | 1                | 0              | -6.713317               | -1.018106 | -1.284664 |
| 38               | 1                | 0              | -4.935741               | -3.683988 | 1.569180  |
| 39               | 8                | 0              | 6.983714                | -3.360075 | -0.232078 |
| 40               | 8                | 0              | -7.045846               | -3.258963 | 0.237096  |
| 41               | 6                | 0              | 8.211129                | -2.879707 | 0.290105  |
| 42               | 1                | 0              | 8.137538                | -2.693762 | 1.365929  |
| 43               | 1                | 0              | 8.942750                | -3.665111 | 0.110514  |
| 44               | 1                | 0              | 8.527505                | -1.966067 | -0.222490 |
| 45               | 6                | 0              | -8.186329               | -2.911203 | -0.529332 |
| 46               | 1                | 0              | -7.962839               | -2.925975 | -1.600338 |
| 47               | 1                | 0              | -8.939556               | -3.665441 | -0.309024 |
| 48               | 1                | 0              | -8.567366               | -1.925522 | -0.245523 |
| 49               | 7                | 0              | 0.064674                | 5.752633  | -0.011210 |
| 50               | 8                | 0              | 0.747818                | 6.308551  | -0.848544 |
| 51               | 8                | 0              | -0.593792               | 6.338935  | 0.824484  |

## Structure 42c (DMSO)

Energy (Hartrees): -1353.95273629

No imaginary frequencies

Standard orientation:

| Center<br>Number | Atomic<br>Number | Atomic<br>Type | Coordinates (Angstroms) |           |           |
|------------------|------------------|----------------|-------------------------|-----------|-----------|
|                  |                  |                | X                       | Y         | Z         |
| 1                | 6                | 0              | -0.737442               | 2.252577  | 0.936640  |
| 2                | 6                | 0              | -0.708263               | 3.637111  | 0.959838  |
| 3                | 6                | 0              | 0.055296                | 4.300007  | 0.006646  |
| 4                | 6                | 0              | 0.783522                | 3.624758  | -0.962178 |
| 5                | 6                | 0              | 0.744016                | 2.238213  | -0.968577 |
| 6                | 6                | 0              | -0.009352               | 1.532252  | -0.020953 |
| 7                | 1                | 0              | -1.324481               | 1.719575  | 1.673937  |
| 8                | 1                | 0              | -1.261048               | 4.194566  | 1.704219  |
| 9                | 1                | 0              | 1.358515                | 4.169923  | -1.698683 |
| 10               | 1                | 0              | 1.291063                | 1.698577  | -1.733916 |
| 11               | 6                | 0              | -0.038594               | 0.052849  | -0.030803 |
| 12               | 6                | 0              | 1.097259                | -0.709341 | -0.055214 |
| 13               | 6                | 0              | -1.293209               | -0.668171 | 0.001910  |
| 14               | 1                | 0              | 0.989019                | -1.789217 | -0.074443 |
| 15               | 1                | 0              | -1.196933               | -1.760445 | 0.030154  |
| 16               | 7                | 0              | -2.445704               | -0.105942 | -0.034450 |
| 17               | 7                | 0              | 2.367145                | -0.259805 | -0.016803 |
| 18               | 1                | 0              | 2.523971                | 0.730263  | 0.136279  |
| 19               | 6                | 0              | 3.523548                | -1.063456 | -0.056199 |
| 20               | 6                | 0              | 4.714741                | -0.545853 | 0.445911  |
| 21               | 6                | 0              | 3.518674                | -2.352013 | -0.600778 |
| 22               | 6                | 0              | 5.888205                | -1.295419 | 0.424864  |
| 23               | 1                | 0              | 4.726426                | 0.455673  | 0.863304  |
| 24               | 6                | 0              | 4.680721                | -3.106010 | -0.608804 |
| 25               | 1                | 0              | 2.618525                | -2.768623 | -1.036241 |
| 26               | 6                | 0              | 5.873792                | -2.588794 | -0.096654 |
| 27               | 1                | 0              | 6.794712                | -0.860088 | 0.824204  |
| 28               | 1                | 0              | 4.681087                | -4.105329 | -1.028540 |
| 29               | 6                | 0              | -3.591419               | -0.923713 | 0.045827  |
| 30               | 6                | 0              | -4.722786               | -0.559336 | -0.684383 |
| 31               | 6                | 0              | -3.669654               | -2.062391 | 0.863651  |
| 32               | 6                | 0              | -5.888624               | -1.321493 | -0.649928 |
| 33               | 1                | 0              | -4.683449               | 0.332012  | -1.301426 |
| 34               | 6                | 0              | -4.827679               | -2.820680 | 0.914001  |
| 35               | 1                | 0              | -2.824620               | -2.341253 | 1.483866  |
| 36               | 6                | 0              | -5.943434               | -2.463344 | 0.150526  |
| 37               | 1                | 0              | -6.739558               | -1.011863 | -1.242723 |
| 38               | 1                | 0              | -4.888903               | -3.694075 | 1.553714  |
| 39               | 8                | 0              | 6.957776                | -3.404206 | -0.155265 |
| 40               | 8                | 0              | -7.030699               | -3.269829 | 0.261384  |
| 41               | 6                | 0              | 8.183143                | -2.896455 | 0.351417  |
| 42               | 1                | 0              | 8.101364                | -2.658236 | 1.416064  |
| 43               | 1                | 0              | 8.918345                | -3.687179 | 0.214756  |
| 44               | 1                | 0              | 8.500801                | -2.007017 | -0.200544 |
| 45               | 6                | 0              | -8.184617               | -2.918882 | -0.487482 |
| 46               | 1                | 0              | -7.974594               | -2.918912 | -1.561019 |
| 47               | 1                | 0              | -8.930907               | -3.679778 | -0.266897 |
| 48               | 1                | 0              | -8.566970               | -1.938505 | -0.188042 |
| 49               | 7                | 0              | 0.091457                | 5.767745  | 0.024032  |
| 50               | 8                | 0              | 0.748731                | 6.334765  | -0.827521 |
| 51               | 8                | 0              | -0.537023               | 6.345704  | 0.889759  |



## Structure 42c (C<sub>2</sub>H<sub>5</sub>OH)

Energy (Hartrees): -1353.95466899

No imaginary frequencies

Standard orientation:

| Center<br>Number | Atomic<br>Number | Atomic<br>Type | Coordinates (Angstroms) |           |           |
|------------------|------------------|----------------|-------------------------|-----------|-----------|
|                  |                  |                | X                       | Y         | Z         |
| 1                | 6                | 0              | -0.739940               | 2.256218  | 0.923453  |
| 2                | 6                | 0              | -0.704441               | 3.640038  | 0.949262  |
| 3                | 6                | 0              | 0.074217                | 4.299730  | 0.005610  |
| 4                | 6                | 0              | 0.806452                | 3.623234  | -0.960017 |
| 5                | 6                | 0              | 0.754907                | 2.237650  | -0.972429 |
| 6                | 6                | 0              | -0.008453               | 1.533978  | -0.030479 |
| 7                | 1                | 0              | -1.333692               | 1.724861  | 1.656447  |
| 8                | 1                | 0              | -1.258961               | 4.198754  | 1.691582  |
| 9                | 1                | 0              | 1.388666                | 4.166453  | -1.692598 |
| 10               | 1                | 0              | 1.299704                | 1.696571  | -1.738431 |
| 11               | 6                | 0              | -0.043115               | 0.055203  | -0.040911 |
| 12               | 6                | 0              | 1.090393                | -0.710200 | -0.061189 |
| 13               | 6                | 0              | -1.300270               | -0.661823 | -0.007460 |
| 14               | 1                | 0              | 0.979466                | -1.789875 | -0.078991 |
| 15               | 1                | 0              | -1.207700               | -1.754275 | 0.024365  |
| 16               | 7                | 0              | -2.450771               | -0.096430 | -0.048055 |
| 17               | 7                | 0              | 2.361916                | -0.264446 | -0.016169 |
| 18               | 1                | 0              | 2.520781                | 0.725237  | 0.136650  |
| 19               | 6                | 0              | 3.516077                | -1.071288 | -0.054992 |
| 20               | 6                | 0              | 4.707180                | -0.557836 | 0.451742  |
| 21               | 6                | 0              | 3.508493                | -2.357462 | -0.604317 |
| 22               | 6                | 0              | 5.878590                | -1.310243 | 0.431264  |
| 23               | 1                | 0              | 4.720511                | 0.442125  | 0.872883  |
| 24               | 6                | 0              | 4.668596                | -3.114734 | -0.611601 |
| 25               | 1                | 0              | 2.608604                | -2.769658 | -1.044532 |
| 26               | 6                | 0              | 5.859579                | -2.600659 | -0.094420 |
| 27               | 1                | 0              | 6.785891                | -0.879581 | 0.833923  |
| 28               | 1                | 0              | 4.669209                | -4.113069 | -1.034339 |
| 29               | 6                | 0              | -3.597484               | -0.912463 | 0.037052  |
| 30               | 6                | 0              | -4.725161               | -0.558198 | -0.703800 |
| 31               | 6                | 0              | -3.679041               | -2.037343 | 0.872489  |
| 32               | 6                | 0              | -5.891029               | -1.319551 | -0.662848 |
| 33               | 1                | 0              | -4.683036               | 0.323877  | -1.333748 |
| 34               | 6                | 0              | -4.837581               | -2.794740 | 0.929771  |
| 35               | 1                | 0              | -2.836621               | -2.305167 | 1.501193  |
| 36               | 6                | 0              | -5.947384               | -2.447242 | 0.155456  |
| 37               | 1                | 0              | -6.740096               | -1.019568 | -1.263275 |
| 38               | 1                | 0              | -4.903834               | -3.657816 | 1.583164  |
| 39               | 8                | 0              | 6.945976                | -3.422143 | -0.152642 |
| 40               | 8                | 0              | -7.039734               | -3.255505 | 0.274086  |
| 41               | 6                | 0              | 8.173671                | -2.921320 | 0.360477  |
| 42               | 1                | 0              | 8.086429                | -2.687752 | 1.425376  |
| 43               | 1                | 0              | 8.903787                | -3.716506 | 0.222469  |
| 44               | 1                | 0              | 8.494683                | -2.032146 | -0.189324 |
| 45               | 6                | 0              | -8.196746               | -2.912388 | -0.477265 |
| 46               | 1                | 0              | -7.987106               | -2.929383 | -1.550378 |
| 47               | 1                | 0              | -8.942622               | -3.669370 | -0.242083 |
| 48               | 1                | 0              | -8.573723               | -1.927234 | -0.188339 |
| 49               | 7                | 0              | 0.123893                | 5.762335  | 0.030787  |
| 50               | 8                | 0              | 0.885858                | 6.327693  | -0.730944 |
| 51               | 8                | 0              | -0.597182               | 6.351445  | 0.813619  |

**Structure 42d (vacuum)**

Energy (Hartrees): -1353.91301870  
 No imaginary frequencies

Standard orientation:

| Center<br>Number | Atomic<br>Number | Atomic<br>Type | Coordinates (Angstroms) |           |           |
|------------------|------------------|----------------|-------------------------|-----------|-----------|
|                  |                  |                | X                       | Y         | Z         |
| 1                | 6                | 0              | 1.475376                | 2.391116  | 0.750671  |
| 2                | 6                | 0              | 1.890792                | 3.710700  | 0.791056  |
| 3                | 6                | 0              | 1.229313                | 4.644119  | 0.003761  |
| 4                | 6                | 0              | 0.174444                | 4.294394  | -0.822622 |
| 5                | 6                | 0              | -0.225743               | 2.966464  | -0.855451 |
| 6                | 6                | 0              | 0.401797                | 1.997000  | -0.061840 |
| 7                | 1                | 0              | 1.984684                | 1.653505  | 1.354902  |
| 8                | 1                | 0              | 2.711905                | 4.026706  | 1.419982  |
| 9                | 1                | 0              | -0.301244               | 5.048237  | -1.435038 |
| 10               | 1                | 0              | -1.019640               | 2.671573  | -1.531317 |
| 11               | 6                | 0              | -0.079678               | 0.599414  | -0.068732 |
| 12               | 6                | 0              | -1.420243               | 0.369693  | -0.133036 |
| 13               | 6                | 0              | 0.855310                | -0.516695 | 0.002385  |
| 14               | 1                | 0              | 0.421414                | -1.502040 | 0.224131  |
| 15               | 1                | 0              | -1.502805               | -1.607681 | -0.670295 |
| 16               | 1                | 0              | -2.106806               | 1.207533  | -0.053372 |
| 17               | 7                | 0              | 2.112122                | -0.386965 | -0.171448 |
| 18               | 7                | 0              | -2.037302               | -0.833106 | -0.309034 |
| 19               | 6                | 0              | 2.948065                | -1.507961 | -0.013811 |
| 20               | 6                | 0              | 4.055950                | -1.612397 | -0.851202 |
| 21               | 6                | 0              | 2.754165                | -2.494072 | 0.965121  |
| 22               | 6                | 0              | 4.926619                | -2.693665 | -0.766193 |
| 23               | 1                | 0              | 4.220510                | -0.832902 | -1.585492 |
| 24               | 6                | 0              | 3.625172                | -3.564046 | 1.069541  |
| 25               | 1                | 0              | 1.939177                | -2.398474 | 1.673968  |
| 26               | 6                | 0              | 4.710576                | -3.678327 | 0.197935  |
| 27               | 1                | 0              | 5.768018                | -2.747267 | -1.443546 |
| 28               | 1                | 0              | 3.496302                | -4.321668 | 1.833013  |
| 29               | 6                | 0              | -3.416163               | -1.045251 | -0.117317 |
| 30               | 6                | 0              | -4.075787               | -2.023586 | -0.852943 |
| 31               | 6                | 0              | -4.141114               | -0.289971 | 0.810132  |
| 32               | 6                | 0              | -5.438696               | -2.249503 | -0.682055 |
| 33               | 1                | 0              | -3.525092               | -2.611671 | -1.579217 |
| 34               | 6                | 0              | -5.500202               | -0.493922 | 0.965416  |
| 35               | 1                | 0              | -3.635484               | 0.441272  | 1.429268  |
| 36               | 6                | 0              | -6.161229               | -1.474174 | 0.223020  |
| 37               | 1                | 0              | -5.919382               | -3.019891 | -1.269435 |
| 38               | 1                | 0              | -6.072648               | 0.084908  | 1.679497  |
| 39               | 8                | 0              | -7.492292               | -1.603419 | 0.457882  |
| 40               | 8                | 0              | 5.505395                | -4.765799 | 0.378497  |
| 41               | 6                | 0              | -8.194480               | -2.587646 | -0.271860 |
| 42               | 1                | 0              | -7.798946               | -3.587987 | -0.068341 |
| 43               | 1                | 0              | -9.227442               | -2.532422 | 0.063496  |
| 44               | 1                | 0              | -8.149941               | -2.388715 | -1.347449 |
| 45               | 6                | 0              | 6.632487                | -4.900934 | -0.460753 |
| 46               | 1                | 0              | 7.128098                | -5.819622 | -0.155032 |
| 47               | 1                | 0              | 6.336448                | -4.979901 | -1.511714 |
| 48               | 1                | 0              | 7.320560                | -4.058374 | -0.338376 |
| 49               | 7                | 0              | 1.671596                | 6.049000  | 0.036932  |
| 50               | 8                | 0              | 1.073334                | 6.844516  | -0.657193 |
| 51               | 8                | 0              | 2.606938                | 6.328187  | 0.756799  |

## Structure 42d (CHCl<sub>3</sub>)

Energy (Hartrees): -1353.95124508

No imaginary frequencies

Standard orientation:

| Center<br>Number | Atomic<br>Number | Atomic<br>Type | Coordinates (Angstroms) |           |           |
|------------------|------------------|----------------|-------------------------|-----------|-----------|
|                  |                  |                | X                       | Y         | Z         |
| 1                | 6                | 0              | 1.480555                | 2.392804  | 0.747142  |
| 2                | 6                | 0              | 1.894874                | 3.712209  | 0.779349  |
| 3                | 6                | 0              | 1.219406                | 4.644386  | -0.000537 |
| 4                | 6                | 0              | 0.148748                | 4.290703  | -0.808400 |
| 5                | 6                | 0              | -0.249627               | 2.963038  | -0.832726 |
| 6                | 6                | 0              | 0.394695                | 1.992797  | -0.049884 |
| 7                | 1                | 0              | 1.997043                | 1.662214  | 1.354810  |
| 8                | 1                | 0              | 2.724461                | 4.022113  | 1.400733  |
| 9                | 1                | 0              | -0.346060               | 5.036076  | -1.416769 |
| 10               | 1                | 0              | -1.059238               | 2.669478  | -1.490406 |
| 11               | 6                | 0              | -0.080407               | 0.594656  | -0.049733 |
| 12               | 6                | 0              | -1.427947               | 0.364523  | -0.103641 |
| 13               | 6                | 0              | 0.854508                | -0.517564 | 0.017781  |
| 14               | 1                | 0              | 0.424903                | -1.500734 | 0.247295  |
| 15               | 1                | 0              | -1.512303               | -1.624444 | -0.589140 |
| 16               | 1                | 0              | -2.109304               | 1.206450  | -0.023370 |
| 17               | 7                | 0              | 2.112081                | -0.389088 | -0.177632 |
| 18               | 7                | 0              | -2.044977               | -0.831118 | -0.258972 |
| 19               | 6                | 0              | 2.953213                | -1.508245 | -0.022755 |
| 20               | 6                | 0              | 4.071959                | -1.597894 | -0.849992 |
| 21               | 6                | 0              | 2.757580                | -2.506985 | 0.944260  |
| 22               | 6                | 0              | 4.953008                | -2.671978 | -0.766041 |
| 23               | 1                | 0              | 4.241517                | -0.813620 | -1.579193 |
| 24               | 6                | 0              | 3.635931                | -3.572535 | 1.044857  |
| 25               | 1                | 0              | 1.933216                | -2.430282 | 1.644818  |
| 26               | 6                | 0              | 4.733647                | -3.669263 | 0.184926  |
| 27               | 1                | 0              | 5.803481                | -2.710478 | -1.433739 |
| 28               | 1                | 0              | 3.499058                | -4.337804 | 1.800439  |
| 29               | 6                | 0              | -3.427938               | -1.039311 | -0.083400 |
| 30               | 6                | 0              | -4.057796               | -2.062249 | -0.786173 |
| 31               | 6                | 0              | -4.181247               | -0.247589 | 0.789562  |
| 32               | 6                | 0              | -5.422844               | -2.293260 | -0.641510 |
| 33               | 1                | 0              | -3.477224               | -2.681454 | -1.462240 |
| 34               | 6                | 0              | -5.543061               | -0.460521 | 0.920309  |
| 35               | 1                | 0              | -3.702289               | 0.522167  | 1.383619  |
| 36               | 6                | 0              | -6.175532               | -1.481706 | 0.207285  |
| 37               | 1                | 0              | -5.882155               | -3.096311 | -1.202546 |
| 38               | 1                | 0              | -6.136115               | 0.148824  | 1.592320  |
| 39               | 8                | 0              | -7.511627               | -1.614872 | 0.411821  |
| 40               | 8                | 0              | 5.534355                | -4.752666 | 0.360590  |
| 41               | 6                | 0              | -8.190848               | -2.629848 | -0.309071 |
| 42               | 1                | 0              | -7.797545               | -3.620489 | -0.062092 |
| 43               | 1                | 0              | -9.233472               | -2.570991 | -0.002902 |
| 44               | 1                | 0              | -8.119535               | -2.461206 | -1.387963 |
| 45               | 6                | 0              | 6.694615                | -4.855888 | -0.447953 |
| 46               | 1                | 0              | 7.195452                | -5.771305 | -0.138339 |
| 47               | 1                | 0              | 6.434639                | -4.926186 | -1.508385 |
| 48               | 1                | 0              | 7.363342                | -4.004973 | -0.287147 |
| 49               | 7                | 0              | 1.658755                | 6.042317  | 0.024670  |
| 50               | 8                | 0              | 1.048306                | 6.847811  | -0.651652 |
| 51               | 8                | 0              | 2.611986                | 6.330539  | 0.721967  |

## Structure 42d (DMSO)

Energy (Hartrees): -1353.94951946  
No imaginary frequencies

Standard orientation:

| Center<br>Number | Atomic<br>Number | Atomic<br>Type | Coordinates (Angstroms) |           |           |
|------------------|------------------|----------------|-------------------------|-----------|-----------|
|                  |                  |                | X                       | Y         | Z         |
| 1                | 6                | 0              | 1.525555                | 2.377156  | 0.775902  |
| 2                | 6                | 0              | 1.976060                | 3.685003  | 0.788279  |
| 3                | 6                | 0              | 1.322280                | 4.624417  | -0.002232 |
| 4                | 6                | 0              | 0.235418                | 4.288280  | -0.796866 |
| 5                | 6                | 0              | -0.199234               | 2.971925  | -0.801587 |
| 6                | 6                | 0              | 0.426575                | 1.993723  | -0.012760 |
| 7                | 1                | 0              | 2.021490                | 1.643203  | 1.397111  |
| 8                | 1                | 0              | 2.815465                | 3.977737  | 1.404980  |
| 9                | 1                | 0              | -0.247069               | 5.036193  | -1.411990 |
| 10               | 1                | 0              | -1.024859               | 2.695112  | -1.446668 |
| 11               | 6                | 0              | -0.074922               | 0.605655  | 0.002816  |
| 12               | 6                | 0              | -1.430916               | 0.404198  | -0.039630 |
| 13               | 6                | 0              | 0.841016                | -0.519950 | 0.059088  |
| 14               | 1                | 0              | 0.401984                | -1.498712 | 0.284808  |
| 15               | 1                | 0              | -1.549099               | -1.604410 | -0.408028 |
| 16               | 1                | 0              | -2.086448               | 1.267442  | 0.019726  |
| 17               | 7                | 0              | 2.100371                | -0.411020 | -0.152978 |
| 18               | 7                | 0              | -2.074212               | -0.775903 | -0.156791 |
| 19               | 6                | 0              | 2.921348                | -1.547990 | -0.015091 |
| 20               | 6                | 0              | 4.036910                | -1.649388 | -0.846149 |
| 21               | 6                | 0              | 2.710330                | -2.555203 | 0.940428  |
| 22               | 6                | 0              | 4.900921                | -2.739116 | -0.776615 |
| 23               | 1                | 0              | 4.221073                | -0.862864 | -1.569965 |
| 24               | 6                | 0              | 3.570388                | -3.637265 | 1.025634  |
| 25               | 1                | 0              | 1.886373                | -2.476042 | 1.641256  |
| 26               | 6                | 0              | 4.665711                | -3.744605 | 0.162508  |
| 27               | 1                | 0              | 5.747599                | -2.784367 | -1.448983 |
| 28               | 1                | 0              | 3.416879                | -4.408574 | 1.772126  |
| 29               | 6                | 0              | -3.466259               | -0.955343 | -0.032750 |
| 30               | 6                | 0              | -4.049289               | -2.079031 | -0.612564 |
| 31               | 6                | 0              | -4.275991               | -0.051136 | 0.662260  |
| 32               | 6                | 0              | -5.420237               | -2.302723 | -0.522695 |
| 33               | 1                | 0              | -3.425251               | -2.787828 | -1.147065 |
| 34               | 6                | 0              | -5.643041               | -0.261896 | 0.738932  |
| 35               | 1                | 0              | -3.845271               | 0.808891  | 1.160824  |
| 36               | 6                | 0              | -6.228559               | -1.384624 | 0.148057  |
| 37               | 1                | 0              | -5.837920               | -3.186865 | -0.985694 |
| 38               | 1                | 0              | -6.274283               | 0.436255  | 1.276426  |
| 39               | 8                | 0              | -7.574026               | -1.503458 | 0.284999  |
| 40               | 8                | 0              | 5.446051                | -4.843277 | 0.321176  |
| 41               | 6                | 0              | -8.194352               | -2.632032 | -0.313748 |
| 42               | 1                | 0              | -7.819433               | -3.564634 | 0.117948  |
| 43               | 1                | 0              | -9.258129               | -2.539604 | -0.103179 |
| 44               | 1                | 0              | -8.038228               | -2.638685 | -1.396540 |
| 45               | 6                | 0              | 6.610518                | -4.945631 | -0.485565 |
| 46               | 1                | 0              | 7.099812                | -5.871972 | -0.190427 |
| 47               | 1                | 0              | 6.354552                | -4.992697 | -1.547876 |
| 48               | 1                | 0              | 7.287406                | -4.104917 | -0.306939 |
| 49               | 7                | 0              | 1.801022                | 6.007953  | -0.002844 |
| 50               | 8                | 0              | 1.208235                | 6.821462  | -0.687096 |
| 51               | 8                | 0              | 2.769952                | 6.280719  | 0.681239  |

## Structure 42d (C<sub>2</sub>H<sub>5</sub>OH)

Energy (Hartrees): -1353.95162430

No imaginary frequencies

Standard orientation:

| Center<br>Number | Atomic<br>Number | Atomic<br>Type | Coordinates (Angstroms) |           |           |
|------------------|------------------|----------------|-------------------------|-----------|-----------|
|                  |                  |                | X                       | Y         | Z         |
| 1                | 6                | 0              | 1.521910                | 2.401167  | 0.803835  |
| 2                | 6                | 0              | 1.973639                | 3.707784  | 0.797758  |
| 3                | 6                | 0              | 1.326507                | 4.633242  | -0.015527 |
| 4                | 6                | 0              | 0.244627                | 4.285199  | -0.812987 |
| 5                | 6                | 0              | -0.191626               | 2.970009  | -0.796870 |
| 6                | 6                | 0              | 0.429099                | 2.005253  | 0.012586  |
| 7                | 1                | 0              | 2.011165                | 1.677653  | 1.442577  |
| 8                | 1                | 0              | 2.808425                | 4.009618  | 1.416491  |
| 9                | 1                | 0              | -0.231234               | 5.021595  | -1.447170 |
| 10               | 1                | 0              | -1.011854               | 2.681791  | -1.443922 |
| 11               | 6                | 0              | -0.067841               | 0.616685  | 0.045847  |
| 12               | 6                | 0              | -1.421885               | 0.407743  | 0.001520  |
| 13               | 6                | 0              | 0.854356                | -0.504230 | 0.108491  |
| 14               | 1                | 0              | 0.426193                | -1.479086 | 0.370342  |
| 15               | 1                | 0              | -1.526180               | -1.604525 | -0.353147 |
| 16               | 1                | 0              | -2.083328               | 1.267246  | 0.049083  |
| 17               | 7                | 0              | 2.106197                | -0.398205 | -0.143473 |
| 18               | 7                | 0              | -2.057358               | -0.778058 | -0.108276 |
| 19               | 6                | 0              | 2.926830                | -1.535363 | -0.001398 |
| 20               | 6                | 0              | 3.973918                | -1.703644 | -0.907222 |
| 21               | 6                | 0              | 2.775838                | -2.478255 | 1.026773  |
| 22               | 6                | 0              | 4.826541                | -2.801723 | -0.836375 |
| 23               | 1                | 0              | 4.111548                | -0.965646 | -1.690089 |
| 24               | 6                | 0              | 3.629539                | -3.565829 | 1.116069  |
| 25               | 1                | 0              | 2.004820                | -2.343024 | 1.777870  |
| 26               | 6                | 0              | 4.653515                | -3.740062 | 0.181228  |
| 27               | 1                | 0              | 5.616798                | -2.905372 | -1.568335 |
| 28               | 1                | 0              | 3.523323                | -4.289585 | 1.916696  |
| 29               | 6                | 0              | -3.450995               | -0.959736 | -0.002757 |
| 30               | 6                | 0              | -4.027562               | -2.074420 | -0.605873 |
| 31               | 6                | 0              | -4.266636               | -0.064490 | 0.696178  |
| 32               | 6                | 0              | -5.399679               | -2.297024 | -0.536354 |
| 33               | 1                | 0              | -3.397980               | -2.775461 | -1.144125 |
| 34               | 6                | 0              | -5.635112               | -0.273471 | 0.752568  |
| 35               | 1                | 0              | -3.838899               | 0.786632  | 1.212733  |
| 36               | 6                | 0              | -6.212023               | -1.385962 | 0.136890  |
| 37               | 1                | 0              | -5.814396               | -3.173133 | -1.017044 |
| 38               | 1                | 0              | -6.274035               | 0.416459  | 1.292193  |
| 39               | 8                | 0              | -7.564953               | -1.503352 | 0.254106  |
| 40               | 8                | 0              | 5.440059                | -4.839981 | 0.352157  |
| 41               | 6                | 0              | -8.184773               | -2.620451 | -0.370660 |
| 42               | 1                | 0              | -7.818802               | -3.559742 | 0.053176  |
| 43               | 1                | 0              | -9.250126               | -2.523398 | -0.170313 |
| 44               | 1                | 0              | -8.014145               | -2.608684 | -1.450859 |
| 45               | 6                | 0              | 6.477580                | -5.063229 | -0.594220 |
| 46               | 1                | 0              | 6.971581                | -5.982180 | -0.284101 |
| 47               | 1                | 0              | 6.067850                | -5.190340 | -1.600131 |
| 48               | 1                | 0              | 7.199403                | -4.241750 | -0.587757 |
| 49               | 7                | 0              | 1.807731                | 6.010429  | -0.039598 |
| 50               | 8                | 0              | 1.227266                | 6.816614  | -0.744520 |
| 51               | 8                | 0              | 2.771286                | 6.300045  | 0.646789  |

## Structure 43a (vacuum)

Energy (Hartrees): -1533.88114121

No imaginary frequencies

Standard orientation:

| Center<br>Number | Atomic<br>Number | Atomic<br>Type | Coordinates (Angstroms) |           |           |
|------------------|------------------|----------------|-------------------------|-----------|-----------|
|                  |                  |                | X                       | Y         | Z         |
| 1                | 6                | 0              | -1.919075               | 2.949419  | -0.864768 |
| 2                | 6                | 0              | -2.411655               | 4.245116  | -0.857294 |
| 3                | 6                | 0              | -1.805603               | 5.179333  | -0.031345 |
| 4                | 6                | 0              | -0.734878               | 4.856622  | 0.787836  |
| 5                | 6                | 0              | -0.264306               | 3.552815  | 0.779201  |
| 6                | 6                | 0              | -0.839038               | 2.580760  | -0.050644 |
| 7                | 1                | 0              | -2.361381               | 2.221340  | -1.534910 |
| 8                | 1                | 0              | -3.240760               | 4.542197  | -1.485338 |
| 9                | 1                | 0              | -0.303819               | 5.613319  | 1.429387  |
| 10               | 1                | 0              | 0.539558                | 3.276755  | 1.451660  |
| 11               | 6                | 0              | -0.326203               | 1.193590  | -0.067203 |
| 12               | 6                | 0              | 1.025119                | 0.976027  | -0.029939 |
| 13               | 6                | 0              | -1.281252               | 0.107466  | -0.101774 |
| 14               | 1                | 0              | 1.689765                | 1.831676  | -0.009745 |
| 15               | 1                | 0              | -2.338635               | 0.393764  | -0.070636 |
| 16               | 1                | 0              | 0.954062                | -1.024091 | -0.041295 |
| 17               | 7                | 0              | -0.949792               | -1.135501 | -0.148706 |
| 18               | 7                | 0              | 1.609741                | -0.239051 | -0.026036 |
| 19               | 6                | 0              | -1.960852               | -2.106456 | -0.065542 |
| 20               | 6                | 0              | -1.866052               | -3.236352 | -0.886733 |
| 21               | 6                | 0              | -3.021467               | -1.998184 | 0.842964  |
| 22               | 6                | 0              | -2.835273               | -4.223028 | -0.835580 |
| 23               | 1                | 0              | -1.032234               | -3.315093 | -1.573266 |
| 24               | 6                | 0              | -3.992499               | -2.985297 | 0.907146  |
| 25               | 1                | 0              | -3.064184               | -1.154539 | 1.521118  |
| 26               | 6                | 0              | -3.885388               | -4.078128 | 0.061280  |
| 27               | 1                | 0              | -2.792781               | -5.097672 | -1.470648 |
| 28               | 1                | 0              | -4.817322               | -2.926366 | 1.604451  |
| 29               | 6                | 0              | 2.976976                | -0.510051 | -0.019722 |
| 30               | 6                | 0              | 3.368564                | -1.845303 | 0.149291  |
| 31               | 6                | 0              | 3.952927                | 0.481205  | -0.180503 |
| 32               | 6                | 0              | 4.706801                | -2.188817 | 0.167350  |
| 33               | 1                | 0              | 2.610783                | -2.610042 | 0.275800  |
| 34               | 6                | 0              | 5.295249                | 0.140901  | -0.156473 |
| 35               | 1                | 0              | 3.682596                | 1.515627  | -0.341228 |
| 36               | 6                | 0              | 5.655385                | -1.186270 | 0.017748  |
| 37               | 1                | 0              | 5.026000                | -3.213726 | 0.299825  |
| 38               | 1                | 0              | 6.065166                | 0.890697  | -0.280291 |
| 39               | 7                | 0              | -4.915274               | -5.131854 | 0.126425  |
| 40               | 8                | 0              | -4.795382               | -6.078499 | -0.620977 |
| 41               | 8                | 0              | -5.817620               | -4.984014 | 0.921998  |
| 42               | 7                | 0              | 7.082380                | -1.541922 | 0.041055  |
| 43               | 8                | 0              | 7.885640                | -0.643684 | -0.092791 |
| 44               | 8                | 0              | 7.364922                | -2.711005 | 0.193587  |
| 45               | 7                | 0              | -2.321981               | 6.561530  | -0.017887 |
| 46               | 8                | 0              | -1.769630               | 7.357576  | 0.710142  |
| 47               | 8                | 0              | -3.265083               | 6.813568  | -0.735786 |

## Structure 43a (CHCl<sub>3</sub>)

Energy (Hartrees): -1533.92114983

No imaginary frequencies

Standard orientation:

| Center<br>Number | Atomic<br>Number | Atomic<br>Type | Coordinates (Angstroms) |           |           |
|------------------|------------------|----------------|-------------------------|-----------|-----------|
|                  |                  |                | X                       | Y         | Z         |
| 1                | 6                | 0              | -1.768089               | 3.033663  | -0.825071 |
| 2                | 6                | 0              | -2.177096               | 4.357094  | -0.824606 |
| 3                | 6                | 0              | -1.486138               | 5.264434  | -0.033485 |
| 4                | 6                | 0              | -0.409621               | 4.885560  | 0.757175  |
| 5                | 6                | 0              | -0.021826               | 3.555816  | 0.754117  |
| 6                | 6                | 0              | -0.684926               | 2.608818  | -0.040627 |
| 7                | 1                | 0              | -2.281975               | 2.326509  | -1.465619 |
| 8                | 1                | 0              | -3.006966               | 4.686363  | -1.435596 |
| 9                | 1                | 0              | 0.097187                | 5.615487  | 1.374406  |
| 10               | 1                | 0              | 0.790204                | 3.244151  | 1.400564  |
| 11               | 6                | 0              | -0.259906               | 1.192996  | -0.057716 |
| 12               | 6                | 0              | 1.078179                | 0.896950  | -0.012130 |
| 13               | 6                | 0              | -1.281628               | 0.170548  | -0.105880 |
| 14               | 1                | 0              | 1.793109                | 1.710836  | 0.023406  |
| 15               | 1                | 0              | -2.318811               | 0.519404  | -0.063731 |
| 16               | 1                | 0              | 0.908013                | -1.105523 | -0.043246 |
| 17               | 7                | 0              | -1.027083               | -1.090968 | -0.173618 |
| 18               | 7                | 0              | 1.594046                | -0.347893 | -0.019236 |
| 19               | 6                | 0              | -2.094093               | -1.995511 | -0.085043 |
| 20               | 6                | 0              | -2.091663               | -3.117355 | -0.925230 |
| 21               | 6                | 0              | -3.125420               | -1.833539 | 0.850991  |
| 22               | 6                | 0              | -3.119070               | -4.041654 | -0.861447 |
| 23               | 1                | 0              | -1.284174               | -3.242981 | -1.636466 |
| 24               | 6                | 0              | -4.155225               | -2.756767 | 0.926969  |
| 25               | 1                | 0              | -3.102370               | -0.996778 | 1.538962  |
| 26               | 6                | 0              | -4.137467               | -3.844572 | 0.064608  |
| 27               | 1                | 0              | -3.137068               | -4.904888 | -1.513460 |
| 28               | 1                | 0              | -4.952732               | -2.644744 | 1.649456  |
| 29               | 6                | 0              | 2.944558                | -0.686883 | -0.014715 |
| 30               | 6                | 0              | 3.268825                | -2.044555 | 0.126732  |
| 31               | 6                | 0              | 3.967559                | 0.260910  | -0.153884 |
| 32               | 6                | 0              | 4.588112                | -2.452182 | 0.140918  |
| 33               | 1                | 0              | 2.474541                | -2.775059 | 0.230691  |
| 34               | 6                | 0              | 5.290450                | -0.143370 | -0.131581 |
| 35               | 1                | 0              | 3.748036                | 1.309855  | -0.296798 |
| 36               | 6                | 0              | 5.586031                | -1.491944 | 0.016950  |
| 37               | 1                | 0              | 4.845391                | -3.497087 | 0.251742  |
| 38               | 1                | 0              | 6.088371                | 0.579425  | -0.238450 |
| 39               | 7                | 0              | -5.223667               | -4.827118 | 0.141760  |
| 40               | 8                | 0              | -5.160373               | -5.806911 | -0.573971 |
| 41               | 8                | 0              | -6.134038               | -4.611679 | 0.917332  |
| 42               | 7                | 0              | 6.986290                | -1.913753 | 0.039268  |
| 43               | 8                | 0              | 7.843664                | -1.053280 | -0.013256 |
| 44               | 8                | 0              | 7.223396                | -3.103929 | 0.111252  |
| 45               | 7                | 0              | -1.911846               | 6.669246  | -0.028465 |
| 46               | 8                | 0              | -1.290852               | 7.451325  | 0.663449  |
| 47               | 8                | 0              | -2.863573               | 6.979184  | -0.716816 |

## Structure 43a (DMSO)

Energy (Hartrees): -1533.91962498

No imaginary frequencies

Standard orientation:

| Center<br>Number | Atomic<br>Number | Atomic<br>Type | Coordinates (Angstroms) |           |           |
|------------------|------------------|----------------|-------------------------|-----------|-----------|
|                  |                  |                | X                       | Y         | Z         |
| 1                | 6                | 0              | -2.104377               | 2.879810  | -0.761351 |
| 2                | 6                | 0              | -2.627386               | 4.162049  | -0.784682 |
| 3                | 6                | 0              | -1.985205               | 5.155345  | -0.056876 |
| 4                | 6                | 0              | -0.843530               | 4.900128  | 0.691870  |
| 5                | 6                | 0              | -0.341292               | 3.610162  | 0.715162  |
| 6                | 6                | 0              | -0.954592               | 2.578662  | -0.013545 |
| 7                | 1                | 0              | -2.584120               | 2.110010  | -1.354168 |
| 8                | 1                | 0              | -3.508761               | 4.393284  | -1.368097 |
| 9                | 1                | 0              | -0.370431               | 5.691029  | 1.258482  |
| 10               | 1                | 0              | 0.525868                | 3.396229  | 1.328829  |
| 11               | 6                | 0              | -0.404403               | 1.207775  | 0.002383  |
| 12               | 6                | 0              | 0.959237                | 1.039908  | 0.030911  |
| 13               | 6                | 0              | -1.324070               | 0.093546  | -0.021067 |
| 14               | 1                | 0              | 1.596548                | 1.916249  | 0.022026  |
| 15               | 1                | 0              | -2.390357               | 0.338468  | -0.018558 |
| 16               | 1                | 0              | 0.965728                | -0.969768 | 0.043756  |
| 17               | 7                | 0              | -0.937531               | -1.136774 | -0.039862 |
| 18               | 7                | 0              | 1.583367                | -0.152642 | 0.045492  |
| 19               | 6                | 0              | -1.889783               | -2.160958 | 0.010996  |
| 20               | 6                | 0              | -1.610632               | -3.335028 | -0.703324 |
| 21               | 6                | 0              | -3.064785               | -2.078613 | 0.773609  |
| 22               | 6                | 0              | -2.502097               | -4.391752 | -0.698728 |
| 23               | 1                | 0              | -0.690031               | -3.396923 | -1.271466 |
| 24               | 6                | 0              | -3.961874               | -3.133544 | 0.788626  |
| 25               | 1                | 0              | -3.265104               | -1.197913 | 1.371899  |
| 26               | 6                | 0              | -3.669896               | -4.271705 | 0.046998  |
| 27               | 1                | 0              | -2.297657               | -5.294696 | -1.258468 |
| 28               | 1                | 0              | -4.869756               | -3.082222 | 1.375061  |
| 29               | 6                | 0              | 2.955543                | -0.379919 | 0.025852  |
| 30               | 6                | 0              | 3.377720                | -1.716901 | 0.088655  |
| 31               | 6                | 0              | 3.906045                | 0.647271  | -0.055718 |
| 32               | 6                | 0              | 4.721909                | -2.029487 | 0.074560  |
| 33               | 1                | 0              | 2.636786                | -2.505907 | 0.153101  |
| 34               | 6                | 0              | 5.254376                | 0.336683  | -0.067770 |
| 35               | 1                | 0              | 3.611979                | 1.686551  | -0.114348 |
| 36               | 6                | 0              | 5.647814                | -0.994254 | -0.001805 |
| 37               | 1                | 0              | 5.050966                | -3.058830 | 0.123751  |
| 38               | 1                | 0              | 5.994539                | 1.123194  | -0.132925 |
| 39               | 7                | 0              | -4.617446               | -5.388270 | 0.063817  |
| 40               | 8                | 0              | -4.346169               | -6.379954 | -0.586665 |
| 41               | 8                | 0              | -5.632049               | -5.271005 | 0.724935  |
| 42               | 7                | 0              | 7.072252                | -1.315084 | -0.013469 |
| 43               | 8                | 0              | 7.868799                | -0.395386 | -0.054186 |
| 44               | 8                | 0              | 7.396967                | -2.487884 | 0.020173  |
| 45               | 7                | 0              | -2.531359               | 6.514986  | -0.077016 |
| 46               | 8                | 0              | -1.952035               | 7.375148  | 0.558905  |
| 47               | 8                | 0              | -3.538451               | 6.719165  | -0.728180 |



## Structure 43a (C<sub>2</sub>H<sub>5</sub>OH)

Energy (Hartrees): -1533.91833091

No imaginary frequencies

Standard orientation:

| Center<br>Number | Atomic<br>Number | Atomic<br>Type | Coordinates (Angstroms) |           |           |
|------------------|------------------|----------------|-------------------------|-----------|-----------|
|                  |                  |                | X                       | Y         | Z         |
| 1                | 6                | 0              | -2.055145               | 2.900201  | -0.763820 |
| 2                | 6                | 0              | -2.564491               | 4.187083  | -0.795766 |
| 3                | 6                | 0              | -1.917624               | 5.174831  | -0.063755 |
| 4                | 6                | 0              | -0.786231               | 4.910714  | 0.698123  |
| 5                | 6                | 0              | -0.301079               | 3.614880  | 0.732753  |
| 6                | 6                | 0              | -0.918456               | 2.588519  | -0.000153 |
| 7                | 1                | 0              | -2.533601               | 2.134479  | -1.362857 |
| 8                | 1                | 0              | -3.435911               | 4.426473  | -1.391038 |
| 9                | 1                | 0              | -0.311513               | 5.697843  | 1.268991  |
| 10               | 1                | 0              | 0.554367                | 3.391285  | 1.359332  |
| 11               | 6                | 0              | -0.386360               | 1.211226  | 0.026621  |
| 12               | 6                | 0              | 0.974484                | 1.026700  | 0.065514  |
| 13               | 6                | 0              | -1.320939               | 0.109131  | -0.004965 |
| 14               | 1                | 0              | 1.623047                | 1.894620  | 0.055403  |
| 15               | 1                | 0              | -2.383936               | 0.368313  | -0.014389 |
| 16               | 1                | 0              | 0.955362                | -0.982489 | 0.087342  |
| 17               | 7                | 0              | -0.950859               | -1.126184 | -0.020293 |
| 18               | 7                | 0              | 1.583692                | -0.173974 | 0.089128  |
| 19               | 6                | 0              | -1.918656               | -2.136071 | 0.018032  |
| 20               | 6                | 0              | -1.654658               | -3.308458 | -0.704860 |
| 21               | 6                | 0              | -3.093539               | -2.041494 | 0.779426  |
| 22               | 6                | 0              | -2.561144               | -4.351488 | -0.710284 |
| 23               | 1                | 0              | -0.733298               | -3.380395 | -1.270635 |
| 24               | 6                | 0              | -4.005056               | -3.083565 | 0.787341  |
| 25               | 1                | 0              | -3.281692               | -1.161723 | 1.383172  |
| 26               | 6                | 0              | -3.727448               | -4.220001 | 0.036827  |
| 27               | 1                | 0              | -2.367611               | -5.253538 | -1.275508 |
| 28               | 1                | 0              | -4.913081               | -3.022648 | 1.372848  |
| 29               | 6                | 0              | 2.952091                | -0.418045 | 0.060848  |
| 30               | 6                | 0              | 3.359086                | -1.760109 | 0.122756  |
| 31               | 6                | 0              | 3.913462                | 0.598459  | -0.030777 |
| 32               | 6                | 0              | 4.698500                | -2.088735 | 0.092907  |
| 33               | 1                | 0              | 2.609803                | -2.540525 | 0.196088  |
| 34               | 6                | 0              | 5.257005                | 0.272555  | -0.062467 |
| 35               | 1                | 0              | 3.631605                | 1.641442  | -0.084055 |
| 36               | 6                | 0              | 5.635083                | -1.063620 | -0.001130 |
| 37               | 1                | 0              | 5.015378                | -3.122216 | 0.139321  |
| 38               | 1                | 0              | 6.005182                | 1.050589  | -0.137495 |
| 39               | 7                | 0              | -4.686369               | -5.321155 | 0.044629  |
| 40               | 8                | 0              | -4.457176               | -6.291278 | -0.654225 |
| 41               | 8                | 0              | -5.676081               | -5.224244 | 0.746828  |
| 42               | 7                | 0              | 7.050280                | -1.400020 | -0.041363 |
| 43               | 8                | 0              | 7.858842                | -0.497283 | -0.166754 |
| 44               | 8                | 0              | 7.370113                | -2.571964 | 0.051530  |
| 45               | 7                | 0              | -2.447412               | 6.536009  | -0.093964 |
| 46               | 8                | 0              | -1.818474               | 7.414345  | 0.466957  |
| 47               | 8                | 0              | -3.496318               | 6.735359  | -0.678400 |

### Structure 43b (vacuum)

Energy (Hartrees): -1533.87328099  
No imaginary frequencies

Standard orientation:

| Center<br>Number | Atomic<br>Number | Atomic<br>Type | Coordinates (Angstroms) |           |           |
|------------------|------------------|----------------|-------------------------|-----------|-----------|
|                  |                  |                | X                       | Y         | Z         |
| 1                | 6                | 0              | 0.408241                | 3.017060  | -0.891807 |
| 2                | 6                | 0              | 0.114216                | 4.372442  | -0.904049 |
| 3                | 6                | 0              | -0.824789               | 4.852934  | -0.004187 |
| 4                | 6                | 0              | -1.465927               | 4.031671  | 0.910238  |
| 5                | 6                | 0              | -1.155273               | 2.679760  | 0.913844  |
| 6                | 6                | 0              | -0.222681               | 2.150587  | 0.009923  |
| 7                | 1                | 0              | 1.124280                | 2.619731  | -1.602383 |
| 8                | 1                | 0              | 0.587842                | 5.052850  | -1.599042 |
| 9                | 1                | 0              | -2.176699               | 4.456320  | 1.606597  |
| 10               | 1                | 0              | -1.614982               | 2.027819  | 1.648648  |
| 11               | 6                | 0              | 0.109506                | 0.709470  | 0.012933  |
| 12               | 6                | 0              | -0.829971               | -0.269462 | 0.007782  |
| 13               | 6                | 0              | 1.518202                | 0.318133  | -0.013379 |
| 14               | 1                | 0              | 2.241960                | 1.131994  | 0.123876  |
| 15               | 1                | 0              | -0.485563               | -1.297018 | 0.018214  |
| 16               | 7                | 0              | 1.905376                | -0.886248 | -0.183852 |
| 17               | 7                | 0              | -2.175449               | -0.081278 | -0.075419 |
| 18               | 1                | 0              | -2.501255               | 0.858833  | -0.260409 |
| 19               | 6                | 0              | -3.151117               | -1.075904 | -0.034500 |
| 20               | 6                | 0              | -4.449928               | -0.744506 | -0.444188 |
| 21               | 6                | 0              | -2.875635               | -2.373127 | 0.414521  |
| 22               | 6                | 0              | -5.455876               | -1.691740 | -0.421500 |
| 23               | 1                | 0              | -4.662644               | 0.259925  | -0.792680 |
| 24               | 6                | 0              | -3.879716               | -3.326712 | 0.427152  |
| 25               | 1                | 0              | -1.891604               | -2.641757 | 0.773184  |
| 26               | 6                | 0              | -5.154227               | -2.976390 | 0.008809  |
| 27               | 1                | 0              | -6.462743               | -1.454160 | -0.737309 |
| 28               | 1                | 0              | -3.689278               | -4.334883 | 0.769984  |
| 29               | 6                | 0              | 3.271929                | -1.178315 | -0.087259 |
| 30               | 6                | 0              | 4.087054                | -0.645543 | 0.920095  |
| 31               | 6                | 0              | 3.817076                | -2.078397 | -1.012094 |
| 32               | 6                | 0              | 5.432552                | -0.974847 | 0.980451  |
| 33               | 1                | 0              | 3.656114                | 0.003430  | 1.673019  |
| 34               | 6                | 0              | 5.160973                | -2.403178 | -0.967591 |
| 35               | 1                | 0              | 3.166922                | -2.503153 | -1.766465 |
| 36               | 6                | 0              | 5.948639                | -1.841566 | 0.029349  |
| 37               | 1                | 0              | 6.080182                | -0.580248 | 1.751756  |
| 38               | 1                | 0              | 5.605569                | -3.084630 | -1.680303 |
| 39               | 7                | 0              | -6.217995               | -3.991453 | 0.029654  |
| 40               | 8                | 0              | -5.923771               | -5.103437 | 0.412905  |
| 41               | 8                | 0              | -7.322197               | -3.652012 | -0.338838 |
| 42               | 7                | 0              | 7.378685                | -2.192264 | 0.089823  |
| 43               | 8                | 0              | 8.040317                | -1.699837 | 0.978765  |
| 44               | 8                | 0              | 7.806598                | -2.949687 | -0.754545 |
| 45               | 7                | 0              | -1.150552               | 6.294317  | -0.016626 |
| 46               | 8                | 0              | -2.000949               | 6.680426  | 0.754952  |
| 47               | 8                | 0              | -0.547252               | 6.995699  | -0.798113 |

## Structure 43b (CHCl<sub>3</sub>)

Energy (Hartrees): -1533.91479474

No imaginary frequencies

Standard orientation:

| Center<br>Number | Atomic<br>Number | Atomic<br>Type | Coordinates (Angstroms) |           |           |
|------------------|------------------|----------------|-------------------------|-----------|-----------|
|                  |                  |                | X                       | Y         | Z         |
| 1                | 6                | 0              | 0.442097                | 3.014084  | -0.885179 |
| 2                | 6                | 0              | 0.165697                | 4.372410  | -0.902684 |
| 3                | 6                | 0              | -0.780313               | 4.865574  | -0.014831 |
| 4                | 6                | 0              | -1.445793               | 4.052102  | 0.891251  |
| 5                | 6                | 0              | -1.154030               | 2.696949  | 0.898340  |
| 6                | 6                | 0              | -0.214666               | 2.155977  | 0.007659  |
| 7                | 1                | 0              | 1.165269                | 2.610605  | -1.585194 |
| 8                | 1                | 0              | 0.663189                | 5.037555  | -1.595964 |
| 9                | 1                | 0              | -2.161336               | 4.475713  | 1.583358  |
| 10               | 1                | 0              | -1.637546               | 2.055533  | 1.626928  |
| 11               | 6                | 0              | 0.103779                | 0.711368  | 0.016228  |
| 12               | 6                | 0              | -0.841889               | -0.266931 | 0.031953  |
| 13               | 6                | 0              | 1.506783                | 0.314922  | -0.016910 |
| 14               | 1                | 0              | 2.233829                | 1.120961  | 0.137216  |
| 15               | 1                | 0              | -0.505262               | -1.296654 | 0.055843  |
| 16               | 7                | 0              | 1.895603                | -0.889180 | -0.215793 |
| 17               | 7                | 0              | -2.183216               | -0.078012 | -0.034963 |
| 18               | 1                | 0              | -2.520402               | 0.861609  | -0.212341 |
| 19               | 6                | 0              | -3.158661               | -1.069427 | -0.000039 |
| 20               | 6                | 0              | -4.467405               | -0.709929 | -0.357176 |
| 21               | 6                | 0              | -2.879827               | -2.387659 | 0.386446  |
| 22               | 6                | 0              | -5.478397               | -1.650004 | -0.351627 |
| 23               | 1                | 0              | -4.681611               | 0.313109  | -0.646385 |
| 24               | 6                | 0              | -3.890173               | -3.332810 | 0.385351  |
| 25               | 1                | 0              | -1.888284               | -2.682450 | 0.702485  |
| 26               | 6                | 0              | -5.174305               | -2.956897 | 0.013061  |
| 27               | 1                | 0              | -6.488427               | -1.381172 | -0.630969 |
| 28               | 1                | 0              | -3.687320               | -4.354322 | 0.678863  |
| 29               | 6                | 0              | 3.257718                | -1.186550 | -0.109696 |
| 30               | 6                | 0              | 4.066933                | -0.668697 | 0.912421  |
| 31               | 6                | 0              | 3.808466                | -2.083368 | -1.037243 |
| 32               | 6                | 0              | 5.407879                | -1.009141 | 0.985510  |
| 33               | 1                | 0              | 3.635689                | -0.019164 | 1.664763  |
| 34               | 6                | 0              | 5.147692                | -2.421496 | -0.979232 |
| 35               | 1                | 0              | 3.168542                | -2.497762 | -1.806844 |
| 36               | 6                | 0              | 5.929377                | -1.874497 | 0.032951  |
| 37               | 1                | 0              | 6.041018                | -0.620117 | 1.771885  |
| 38               | 1                | 0              | 5.585204                | -3.101714 | -1.697824 |
| 39               | 7                | 0              | -6.235930               | -3.962014 | 0.008538  |
| 40               | 8                | 0              | -5.950400               | -5.097757 | 0.335171  |
| 41               | 8                | 0              | -7.352273               | -3.612845 | -0.323925 |
| 42               | 7                | 0              | 7.348155                | -2.235129 | 0.106717  |
| 43               | 8                | 0              | 8.020073                | -1.738175 | 0.989416  |
| 44               | 8                | 0              | 7.784435                | -3.011617 | -0.720235 |
| 45               | 7                | 0              | -1.084007               | 6.304893  | -0.029912 |
| 46               | 8                | 0              | -1.942836               | 6.712791  | 0.725312  |
| 47               | 8                | 0              | -0.460567               | 7.009909  | -0.796646 |

## Structure 43b (DMSO)

Energy (Hartrees): -1533.91377862

No imaginary frequencies

Standard orientation:

| Center<br>Number | Atomic<br>Number | Atomic<br>Type | Coordinates (Angstroms) |           |           |
|------------------|------------------|----------------|-------------------------|-----------|-----------|
|                  |                  |                | X                       | Y         | Z         |
| 1                | 6                | 0              | -0.559556               | 3.016676  | -0.745860 |
| 2                | 6                | 0              | -0.326603               | 4.382502  | -0.726154 |
| 3                | 6                | 0              | 0.661904                | 4.872535  | 0.116644  |
| 4                | 6                | 0              | 1.412199                | 4.045247  | 0.941113  |
| 5                | 6                | 0              | 1.162541                | 2.682365  | 0.912393  |
| 6                | 6                | 0              | 0.180554                | 2.145550  | 0.066711  |
| 7                | 1                | 0              | -1.315790               | 2.620293  | -1.413961 |
| 8                | 1                | 0              | -0.893785               | 5.053170  | -1.357828 |
| 9                | 1                | 0              | 2.162917                | 4.459552  | 1.600721  |
| 10               | 1                | 0              | 1.719238                | 2.032664  | 1.578514  |
| 11               | 6                | 0              | -0.100300               | 0.694199  | 0.045540  |
| 12               | 6                | 0              | 0.869376                | -0.262195 | 0.007874  |
| 13               | 6                | 0              | -1.493602               | 0.267641  | 0.056000  |
| 14               | 1                | 0              | -2.233079               | 1.066030  | 0.181663  |
| 15               | 1                | 0              | 0.559200                | -1.300359 | 0.035387  |
| 16               | 7                | 0              | -1.860599               | -0.957616 | -0.032302 |
| 17               | 7                | 0              | 2.200417                | -0.044024 | -0.109806 |
| 18               | 1                | 0              | 2.517907                | 0.903529  | -0.289418 |
| 19               | 6                | 0              | 3.194771                | -1.015353 | -0.090940 |
| 20               | 6                | 0              | 4.488823                | -0.633750 | -0.479548 |
| 21               | 6                | 0              | 2.949576                | -2.336138 | 0.311815  |
| 22               | 6                | 0              | 5.516984                | -1.554702 | -0.485378 |
| 23               | 1                | 0              | 4.675514                | 0.390270  | -0.783612 |
| 24               | 6                | 0              | 3.976791                | -3.261962 | 0.298531  |
| 25               | 1                | 0              | 1.971369                | -2.647534 | 0.652602  |
| 26               | 6                | 0              | 5.246845                | -2.864434 | -0.101450 |
| 27               | 1                | 0              | 6.514249                | -1.265410 | -0.789001 |
| 28               | 1                | 0              | 3.795240                | -4.282650 | 0.608033  |
| 29               | 6                | 0              | -3.225751               | -1.254702 | -0.030138 |
| 30               | 6                | 0              | -4.166676               | -0.492992 | -0.741449 |
| 31               | 6                | 0              | -3.649541               | -2.397000 | 0.665618  |
| 32               | 6                | 0              | -5.506176               | -0.842764 | -0.726450 |
| 33               | 1                | 0              | -3.841902               | 0.361009  | -1.324369 |
| 34               | 6                | 0              | -4.985751               | -2.750715 | 0.692490  |
| 35               | 1                | 0              | -2.914293               | -2.992723 | 1.193298  |
| 36               | 6                | 0              | -5.897393               | -1.963687 | -0.003987 |
| 37               | 1                | 0              | -6.236894               | -0.262782 | -1.274558 |
| 38               | 1                | 0              | -5.319222               | -3.622538 | 1.239686  |
| 39               | 7                | 0              | 6.327631                | -3.845277 | -0.110809 |
| 40               | 8                | 0              | 6.067436                | -4.991453 | 0.206927  |
| 41               | 8                | 0              | 7.439558                | -3.471791 | -0.437444 |
| 42               | 7                | 0              | -7.312423               | -2.336527 | 0.013275  |
| 43               | 8                | 0              | -8.103635               | -1.618810 | -0.569825 |
| 44               | 8                | 0              | -7.632439               | -3.346224 | 0.612502  |
| 45               | 7                | 0              | 0.917593                | 6.318756  | 0.141944  |
| 46               | 8                | 0              | 1.778519                | 6.734519  | 0.892701  |
| 47               | 8                | 0              | 0.255174                | 7.029055  | -0.589051 |

## Structure 43b (C<sub>2</sub>H<sub>5</sub>OH)

Energy (Hartrees): -1533.91246890

No imaginary frequencies

Standard orientation:

| Center<br>Number | Atomic<br>Number | Atomic<br>Type | Coordinates (Angstroms) |           |           |
|------------------|------------------|----------------|-------------------------|-----------|-----------|
|                  |                  |                | X                       | Y         | Z         |
| 1                | 6                | 0              | -0.447350               | 2.965452  | -0.847797 |
| 2                | 6                | 0              | -0.186013               | 4.326161  | -0.846954 |
| 3                | 6                | 0              | 0.716556                | 4.824152  | 0.084031  |
| 4                | 6                | 0              | 1.356863                | 4.013088  | 1.010703  |
| 5                | 6                | 0              | 1.082405                | 2.654651  | 0.995623  |
| 6                | 6                | 0              | 0.184895                | 2.110698  | 0.065623  |
| 7                | 1                | 0              | -1.139634               | 2.559501  | -1.576997 |
| 8                | 1                | 0              | -0.663765               | 4.986574  | -1.558534 |
| 9                | 1                | 0              | 2.042304                | 4.435628  | 1.733400  |
| 10               | 1                | 0              | 1.550057                | 2.012469  | 1.734067  |
| 11               | 6                | 0              | -0.113925               | 0.661359  | 0.058965  |
| 12               | 6                | 0              | 0.848599                | -0.301183 | 0.049713  |
| 13               | 6                | 0              | -1.512390               | 0.253997  | 0.043248  |
| 14               | 1                | 0              | -2.243646               | 1.069907  | 0.023450  |
| 15               | 1                | 0              | 0.528799                | -1.335849 | 0.051631  |
| 16               | 7                | 0              | -1.897402               | -0.967426 | 0.099714  |
| 17               | 7                | 0              | 2.185330                | -0.084215 | -0.004145 |
| 18               | 1                | 0              | 2.509035                | 0.875704  | -0.073010 |
| 19               | 6                | 0              | 3.182409                | -1.050506 | -0.034159 |
| 20               | 6                | 0              | 4.506484                | -0.608589 | -0.192571 |
| 21               | 6                | 0              | 2.917929                | -2.422588 | 0.091647  |
| 22               | 6                | 0              | 5.547039                | -1.512682 | -0.233027 |
| 23               | 1                | 0              | 4.707957                | 0.452748  | -0.286726 |
| 24               | 6                | 0              | 3.958724                | -3.331103 | 0.045868  |
| 25               | 1                | 0              | 1.912131                | -2.794426 | 0.228977  |
| 26               | 6                | 0              | 5.260264                | -2.869763 | -0.117115 |
| 27               | 1                | 0              | 6.566928                | -1.173208 | -0.355548 |
| 28               | 1                | 0              | 3.761251                | -4.390810 | 0.139998  |
| 29               | 6                | 0              | -3.265771               | -1.242884 | 0.050235  |
| 30               | 6                | 0              | -4.126133               | -0.620775 | -0.868070 |
| 31               | 6                | 0              | -3.773869               | -2.219779 | 0.920258  |
| 32               | 6                | 0              | -5.472305               | -0.942589 | -0.894331 |
| 33               | 1                | 0              | -3.731321               | 0.098659  | -1.576051 |
| 34               | 6                | 0              | -5.118475               | -2.538065 | 0.912572  |
| 35               | 1                | 0              | -3.098712               | -2.710719 | 1.610986  |
| 36               | 6                | 0              | -5.949609               | -1.891472 | 0.002504  |
| 37               | 1                | 0              | -6.141886               | -0.470949 | -1.601645 |
| 38               | 1                | 0              | -5.519767               | -3.276286 | 1.594265  |
| 39               | 7                | 0              | 6.350811                | -3.829647 | -0.164766 |
| 40               | 8                | 0              | 6.085302                | -5.016407 | -0.084736 |
| 41               | 8                | 0              | 7.488860                | -3.409705 | -0.283604 |
| 42               | 7                | 0              | -7.368832               | -2.228292 | -0.018463 |
| 43               | 8                | 0              | -8.079338               | -1.696053 | -0.852166 |
| 44               | 8                | 0              | -7.787560               | -3.026428 | 0.800437  |
| 45               | 7                | 0              | 1.001706                | 6.262075  | 0.090052  |
| 46               | 8                | 0              | 1.791705                | 6.689743  | 0.909534  |
| 47               | 8                | 0              | 0.436159                | 6.964864  | -0.725316 |

### Structure 43c (vacuum)

Energy (Hartrees): -1533.87483041

No imaginary frequencies

Standard orientation:

| Center<br>Number | Atomic<br>Number | Atomic<br>Type | Coordinates (Angstroms) |           |           |
|------------------|------------------|----------------|-------------------------|-----------|-----------|
|                  |                  |                | X                       | Y         | Z         |
| 1                | 6                | 0              | -0.753310               | 2.427325  | 0.896754  |
| 2                | 6                | 0              | -0.694940               | 3.812052  | 0.930790  |
| 3                | 6                | 0              | 0.114788                | 4.464352  | 0.013217  |
| 4                | 6                | 0              | 0.857013                | 3.785448  | -0.939346 |
| 5                | 6                | 0              | 0.789691                | 2.399081  | -0.958672 |
| 6                | 6                | 0              | -0.004547               | 1.704739  | -0.038445 |
| 7                | 1                | 0              | -1.388035               | 1.898069  | 1.594924  |
| 8                | 1                | 0              | -1.261193               | 4.388001  | 1.650141  |
| 9                | 1                | 0              | 1.458669                | 4.339067  | -1.647421 |
| 10               | 1                | 0              | 1.339174                | 1.848226  | -1.714366 |
| 11               | 6                | 0              | -0.048366               | 0.223428  | -0.057573 |
| 12               | 6                | 0              | 1.073849                | -0.537822 | -0.031930 |
| 13               | 6                | 0              | -1.320363               | -0.482288 | -0.069843 |
| 14               | 1                | 0              | 0.978966                | -1.617582 | -0.056399 |
| 15               | 1                | 0              | -1.254582               | -1.579251 | -0.075252 |
| 16               | 7                | 0              | -2.448027               | 0.112091  | -0.098157 |
| 17               | 7                | 0              | 2.350092                | -0.069205 | 0.082416  |
| 18               | 1                | 0              | 2.460225                | 0.917047  | 0.281032  |
| 19               | 6                | 0              | 3.513646                | -0.833541 | 0.045290  |
| 20               | 6                | 0              | 4.699348                | -0.262879 | 0.529037  |
| 21               | 6                | 0              | 3.533722                | -2.133032 | -0.476173 |
| 22               | 6                | 0              | 5.881518                | -0.978116 | 0.507120  |
| 23               | 1                | 0              | 4.683880                | 0.743013  | 0.932986  |
| 24               | 6                | 0              | 4.714755                | -2.856594 | -0.486598 |
| 25               | 1                | 0              | 2.643510                | -2.575476 | -0.901914 |
| 26               | 6                | 0              | 5.871468                | -2.272473 | 0.005274  |
| 27               | 1                | 0              | 6.804815                | -0.555110 | 0.879672  |
| 28               | 1                | 0              | 4.752937                | -3.861167 | -0.886000 |
| 29               | 6                | 0              | -3.615810               | -0.660343 | -0.053813 |
| 30               | 6                | 0              | -4.667634               | -0.322063 | -0.914172 |
| 31               | 6                | 0              | -3.779003               | -1.712821 | 0.856685  |
| 32               | 6                | 0              | -5.843977               | -1.050592 | -0.902418 |
| 33               | 1                | 0              | -4.536309               | 0.510930  | -1.593047 |
| 34               | 6                | 0              | -4.959598               | -2.439053 | 0.885641  |
| 35               | 1                | 0              | -2.989152               | -1.937716 | 1.563476  |
| 36               | 6                | 0              | -5.969684               | -2.100462 | -0.001037 |
| 37               | 1                | 0              | -6.663860               | -0.817019 | -1.568134 |
| 38               | 1                | 0              | -5.110527               | -3.249732 | 1.585516  |
| 39               | 7                | 0              | 7.124976                | -3.041468 | -0.014680 |
| 40               | 8                | 0              | 7.079980                | -4.174653 | -0.443555 |
| 41               | 8                | 0              | 8.123640                | -2.493522 | 0.400257  |
| 42               | 7                | 0              | -7.225875               | -2.869898 | 0.025466  |
| 43               | 8                | 0              | -7.314062               | -3.773436 | 0.829660  |
| 44               | 8                | 0              | -8.093827               | -2.554621 | -0.760020 |
| 45               | 7                | 0              | 0.186546                | 5.940693  | 0.048527  |
| 46               | 8                | 0              | 0.900071                | 6.484114  | -0.766280 |
| 47               | 8                | 0              | -0.469288               | 6.511760  | 0.891320  |

## Structure 43c (CHCl<sub>3</sub>)

Energy (Hartrees): -1533.91741099

No imaginary frequencies

Standard orientation:

| Center<br>Number | Atomic<br>Number | Atomic<br>Type | Coordinates (Angstroms) |           |           |
|------------------|------------------|----------------|-------------------------|-----------|-----------|
|                  |                  |                | X                       | Y         | Z         |
| 1                | 6                | 0              | -0.748768               | 2.405553  | 0.921070  |
| 2                | 6                | 0              | -0.724841               | 3.790307  | 0.966146  |
| 3                | 6                | 0              | 0.040815                | 4.469075  | 0.027798  |
| 4                | 6                | 0              | 0.774764                | 3.815485  | -0.950322 |
| 5                | 6                | 0              | 0.740812                | 2.428524  | -0.979534 |
| 6                | 6                | 0              | -0.012633               | 1.708573  | -0.044593 |
| 7                | 1                | 0              | -1.341565               | 1.857067  | 1.642043  |
| 8                | 1                | 0              | -1.284847               | 4.337579  | 1.712501  |
| 9                | 1                | 0              | 1.346710                | 4.379615  | -1.674758 |
| 10               | 1                | 0              | 1.288678                | 1.899456  | -1.751643 |
| 11               | 6                | 0              | -0.033870               | 0.226868  | -0.081125 |
| 12               | 6                | 0              | 1.098270                | -0.527988 | -0.076572 |
| 13               | 6                | 0              | -1.291343               | -0.493591 | -0.097018 |
| 14               | 1                | 0              | 1.007609                | -1.607530 | -0.125833 |
| 15               | 1                | 0              | -1.210644               | -1.587340 | -0.088760 |
| 16               | 7                | 0              | -2.431828               | 0.086501  | -0.145553 |
| 17               | 7                | 0              | 2.366153                | -0.052600 | 0.038151  |
| 18               | 1                | 0              | 2.482799                | 0.932912  | 0.246597  |
| 19               | 6                | 0              | 3.531508                | -0.811168 | 0.011968  |
| 20               | 6                | 0              | 4.707033                | -0.225601 | 0.505737  |
| 21               | 6                | 0              | 3.565224                | -2.115684 | -0.499506 |
| 22               | 6                | 0              | 5.893925                | -0.930630 | 0.504944  |
| 23               | 1                | 0              | 4.675610                | 0.783596  | 0.900484  |
| 24               | 6                | 0              | 4.751603                | -2.828228 | -0.491496 |
| 25               | 1                | 0              | 2.682145                | -2.572744 | -0.925559 |
| 26               | 6                | 0              | 5.899368                | -2.230827 | 0.012225  |
| 27               | 1                | 0              | 6.803866                | -0.489512 | 0.889307  |
| 28               | 1                | 0              | 4.791696                | -3.835280 | -0.884985 |
| 29               | 6                | 0              | -3.587955               | -0.697130 | -0.087350 |
| 30               | 6                | 0              | -4.674649               | -0.335061 | -0.896923 |
| 31               | 6                | 0              | -3.715677               | -1.782374 | 0.792923  |
| 32               | 6                | 0              | -5.848465               | -1.065555 | -0.865503 |
| 33               | 1                | 0              | -4.575530               | 0.519809  | -1.554712 |
| 34               | 6                | 0              | -4.891393               | -2.512795 | 0.841278  |
| 35               | 1                | 0              | -2.898147               | -2.033495 | 1.457889  |
| 36               | 6                | 0              | -5.938003               | -2.146493 | 0.005513  |
| 37               | 1                | 0              | -6.688448               | -0.803713 | -1.495055 |
| 38               | 1                | 0              | -5.003931               | -3.346511 | 1.521516  |
| 39               | 7                | 0              | 7.152179                | -2.984913 | 0.012979  |
| 40               | 8                | 0              | 7.133219                | -4.127006 | -0.403605 |
| 41               | 8                | 0              | 8.151093                | -2.432228 | 0.431304  |
| 42               | 7                | 0              | -7.184241               | -2.915315 | 0.055169  |
| 43               | 8                | 0              | -7.266575               | -3.820860 | 0.862369  |
| 44               | 8                | 0              | -8.074742               | -2.612671 | -0.714804 |
| 45               | 7                | 0              | 0.071546                | 5.940371  | 0.070279  |
| 46               | 8                | 0              | 0.739313                | 6.519766  | -0.761977 |
| 47               | 8                | 0              | -0.570683               | 6.498029  | 0.936190  |

## Structure 43c (DMSO)

Energy (Hartrees): -1533.91774205

No imaginary frequencies

Standard orientation:

| Center<br>Number | Atomic<br>Number | Atomic<br>Type | Coordinates (Angstroms) |           |           |
|------------------|------------------|----------------|-------------------------|-----------|-----------|
|                  |                  |                | X                       | Y         | Z         |
| 1                | 6                | 0              | -0.623238               | 2.467692  | -0.977487 |
| 2                | 6                | 0              | -0.569594               | 3.851972  | -0.952537 |
| 3                | 6                | 0              | 0.112610                | 4.467931  | 0.089105  |
| 4                | 6                | 0              | 0.736488                | 3.751960  | 1.099575  |
| 5                | 6                | 0              | 0.672331                | 2.366072  | 1.058770  |
| 6                | 6                | 0              | -0.000870               | 1.710055  | 0.021857  |
| 7                | 1                | 0              | -1.145886               | 1.966816  | -1.783061 |
| 8                | 1                | 0              | -1.042019               | 4.442567  | -1.726081 |
| 9                | 1                | 0              | 1.250677                | 4.264076  | 1.901984  |
| 10               | 1                | 0              | 1.139341                | 1.789518  | 1.849992  |
| 11               | 6                | 0              | -0.054750               | 0.229208  | -0.017000 |
| 12               | 6                | 0              | 1.059525                | -0.554156 | -0.012421 |
| 13               | 6                | 0              | -1.322187               | -0.465174 | -0.060736 |
| 14               | 1                | 0              | 0.933662                | -1.629838 | -0.026955 |
| 15               | 1                | 0              | -1.257088               | -1.559066 | -0.076540 |
| 16               | 7                | 0              | -2.458042               | 0.131816  | -0.090510 |
| 17               | 7                | 0              | 2.338271                | -0.102882 | -0.013900 |
| 18               | 1                | 0              | 2.485261                | 0.901199  | -0.042620 |
| 19               | 6                | 0              | 3.494845                | -0.871827 | -0.038835 |
| 20               | 6                | 0              | 4.719366                | -0.186995 | -0.103534 |
| 21               | 6                | 0              | 3.485850                | -2.274305 | -0.000983 |
| 22               | 6                | 0              | 5.911585                | -0.880490 | -0.131890 |
| 23               | 1                | 0              | 4.721099                | 0.896713  | -0.135922 |
| 24               | 6                | 0              | 4.680548                | -2.971028 | -0.030831 |
| 25               | 1                | 0              | 2.562176                | -2.834054 | 0.051136  |
| 26               | 6                | 0              | 5.879150                | -2.271090 | -0.095095 |
| 27               | 1                | 0              | 6.854867                | -0.353375 | -0.183677 |
| 28               | 1                | 0              | 4.680292                | -4.052527 | -0.004007 |
| 29               | 6                | 0              | -3.616730               | -0.649493 | -0.042153 |
| 30               | 6                | 0              | -4.706105               | -0.276421 | -0.843843 |
| 31               | 6                | 0              | -3.742762               | -1.748675 | 0.821965  |
| 32               | 6                | 0              | -5.880200               | -1.007042 | -0.820608 |
| 33               | 1                | 0              | -4.611593               | 0.586751  | -1.491932 |
| 34               | 6                | 0              | -4.918071               | -2.479275 | 0.862124  |
| 35               | 1                | 0              | -2.922345               | -2.014712 | 1.477775  |
| 36               | 6                | 0              | -5.968034               | -2.101298 | 0.034467  |
| 37               | 1                | 0              | -6.719003               | -0.733010 | -1.446832 |
| 38               | 1                | 0              | -5.023011               | -3.324820 | 1.528849  |
| 39               | 7                | 0              | 7.135097                | -3.012180 | -0.129766 |
| 40               | 8                | 0              | 7.088132                | -4.228374 | -0.090114 |
| 41               | 8                | 0              | 8.173453                | -2.379691 | -0.198518 |
| 42               | 7                | 0              | -7.211176               | -2.872429 | 0.073600  |
| 43               | 8                | 0              | -7.297967               | -3.781921 | 0.877741  |
| 44               | 8                | 0              | -8.099686               | -2.570593 | -0.701180 |
| 45               | 7                | 0              | 0.176367                | 5.937161  | 0.120782  |
| 46               | 8                | 0              | 0.822259                | 6.462360  | 1.006082  |
| 47               | 8                | 0              | -0.419764               | 6.552924  | -0.740635 |



## Structure 43c (C<sub>2</sub>H<sub>5</sub>OH)

Energy (Hartrees): -1533.91672400

No imaginary frequencies

Standard orientation:

| Center<br>Number | Atomic<br>Number | Atomic<br>Type | Coordinates (Angstroms) |           |           |
|------------------|------------------|----------------|-------------------------|-----------|-----------|
|                  |                  |                | X                       | Y         | Z         |
| 1                | 6                | 0              | -0.729777               | 2.437764  | 0.940510  |
| 2                | 6                | 0              | -0.693667               | 3.821969  | 0.972226  |
| 3                | 6                | 0              | 0.078232                | 4.483235  | 0.025198  |
| 4                | 6                | 0              | 0.803391                | 3.813397  | -0.949285 |
| 5                | 6                | 0              | 0.751449                | 2.427214  | -0.968210 |
| 6                | 6                | 0              | -0.005722               | 1.724498  | -0.023339 |
| 7                | 1                | 0              | -1.317184               | 1.902131  | 1.676046  |
| 8                | 1                | 0              | -1.242759               | 4.378066  | 1.720441  |
| 9                | 1                | 0              | 1.381783                | 4.360526  | -1.681901 |
| 10               | 1                | 0              | 1.292215                | 1.886917  | -1.737548 |
| 11               | 6                | 0              | -0.042752               | 0.243559  | -0.041186 |
| 12               | 6                | 0              | 1.079897                | -0.527992 | -0.028933 |
| 13               | 6                | 0              | -1.303714               | -0.464515 | -0.056909 |
| 14               | 1                | 0              | 0.969591                | -1.606348 | -0.061159 |
| 15               | 1                | 0              | -1.231508               | -1.557239 | -0.016365 |
| 16               | 7                | 0              | -2.442297               | 0.120292  | -0.150610 |
| 17               | 7                | 0              | 2.352175                | -0.066402 | 0.069074  |
| 18               | 1                | 0              | 2.486497                | 0.924416  | 0.244729  |
| 19               | 6                | 0              | 3.508498                | -0.834169 | 0.031893  |
| 20               | 6                | 0              | 4.708373                | -0.230616 | 0.442045  |
| 21               | 6                | 0              | 3.513362                | -2.163880 | -0.414141 |
| 22               | 6                | 0              | 5.889451                | -0.943059 | 0.427876  |
| 23               | 1                | 0              | 4.700375                | 0.799242  | 0.780942  |
| 24               | 6                | 0              | 4.694288                | -2.882783 | -0.421455 |
| 25               | 1                | 0              | 2.610462                | -2.637375 | -0.775324 |
| 26               | 6                | 0              | 5.867235                | -2.267883 | 0.001259  |
| 27               | 1                | 0              | 6.815309                | -0.484323 | 0.748920  |
| 28               | 1                | 0              | 4.707013                | -3.909002 | -0.764414 |
| 29               | 6                | 0              | -3.595851               | -0.664375 | -0.090795 |
| 30               | 6                | 0              | -4.654708               | -0.360183 | -0.959994 |
| 31               | 6                | 0              | -3.748309               | -1.699682 | 0.845649  |
| 32               | 6                | 0              | -5.822220               | -1.099067 | -0.931528 |
| 33               | 1                | 0              | -4.539427               | 0.453618  | -1.665769 |
| 34               | 6                | 0              | -4.917555               | -2.438826 | 0.890488  |
| 35               | 1                | 0              | -2.953975               | -1.906106 | 1.553289  |
| 36               | 6                | 0              | -5.935499               | -2.131944 | -0.004748 |
| 37               | 1                | 0              | -6.636222               | -0.878984 | -1.609493 |
| 38               | 1                | 0              | -5.042593               | -3.235230 | 1.612217  |
| 39               | 7                | 0              | 7.107199                | -3.027369 | -0.008445 |
| 40               | 8                | 0              | 7.075681                | -4.187947 | -0.378519 |
| 41               | 8                | 0              | 8.129604                | -2.473136 | 0.355786  |
| 42               | 7                | 0              | -7.168819               | -2.909037 | 0.037857  |
| 43               | 8                | 0              | -7.268802               | -3.794377 | 0.868440  |
| 44               | 8                | 0              | -8.050233               | -2.643488 | -0.759601 |
| 45               | 7                | 0              | 0.129252                | 5.948655  | 0.057392  |
| 46               | 8                | 0              | 0.891930                | 6.515010  | -0.701375 |
| 47               | 8                | 0              | -0.591750               | 6.532782  | 0.842616  |

## Structure 43d (vacuum)

Energy (Hartrees): -1533.86921125

No imaginary frequencies

Standard orientation:

| Center<br>Number | Atomic<br>Number | Atomic<br>Type | Coordinates (Angstroms) |           |           |
|------------------|------------------|----------------|-------------------------|-----------|-----------|
|                  |                  |                | X                       | Y         | Z         |
| 1                | 6                | 0              | 1.354660                | 2.688999  | 0.749305  |
| 2                | 6                | 0              | 1.676782                | 4.032013  | 0.849591  |
| 3                | 6                | 0              | 0.985120                | 4.942800  | 0.063604  |
| 4                | 6                | 0              | -0.006756               | 4.554399  | -0.820549 |
| 5                | 6                | 0              | -0.313963               | 3.204192  | -0.912841 |
| 6                | 6                | 0              | 0.346023                | 2.256836  | -0.121685 |
| 7                | 1                | 0              | 1.884684                | 1.968069  | 1.356352  |
| 8                | 1                | 0              | 2.445349                | 4.383314  | 1.524622  |
| 9                | 1                | 0              | -0.507549               | 5.296702  | -1.427112 |
| 10               | 1                | 0              | -1.058673               | 2.878262  | -1.629535 |
| 11               | 6                | 0              | -0.046704               | 0.830589  | -0.185089 |
| 12               | 6                | 0              | -1.365873               | 0.516718  | -0.256463 |
| 13               | 6                | 0              | 0.957414                | -0.225363 | -0.143513 |
| 14               | 1                | 0              | 0.590037                | -1.245741 | 0.032349  |
| 15               | 1                | 0              | -1.311679               | -1.430019 | -0.907895 |
| 16               | 1                | 0              | -2.103486               | 1.306461  | -0.157284 |
| 17               | 7                | 0              | 2.206190                | -0.008346 | -0.286417 |
| 18               | 7                | 0              | -1.895223               | -0.728642 | -0.477790 |
| 19               | 6                | 0              | 3.095739                | -1.081811 | -0.142233 |
| 20               | 6                | 0              | 4.159837                | -1.177951 | -1.047115 |
| 21               | 6                | 0              | 2.982039                | -2.016134 | 0.895564  |
| 22               | 6                | 0              | 5.065772                | -2.219614 | -0.953646 |
| 23               | 1                | 0              | 4.251899                | -0.428394 | -1.822944 |
| 24               | 6                | 0              | 3.894055                | -3.054910 | 1.005700  |
| 25               | 1                | 0              | 2.198442                | -1.905765 | 1.635856  |
| 26               | 6                | 0              | 4.915034                | -3.144024 | 0.072574  |
| 27               | 1                | 0              | 5.886174                | -2.322917 | -1.650812 |
| 28               | 1                | 0              | 3.830470                | -3.784128 | 1.802134  |
| 29               | 6                | 0              | -3.229186               | -1.075963 | -0.274974 |
| 30               | 6                | 0              | -3.727561               | -2.227421 | -0.899778 |
| 31               | 6                | 0              | -4.069259               | -0.311670 | 0.543813  |
| 32               | 6                | 0              | -5.046565               | -2.600970 | -0.728053 |
| 33               | 1                | 0              | -3.076748               | -2.821825 | -1.531348 |
| 34               | 6                | 0              | -5.396535               | -0.675270 | 0.704130  |
| 35               | 1                | 0              | -3.686008               | 0.545559  | 1.081108  |
| 36               | 6                | 0              | -5.868087               | -1.811421 | 0.065999  |
| 37               | 1                | 0              | -5.450835               | -3.484332 | -1.203759 |
| 38               | 1                | 0              | -6.063069               | -0.099435 | 1.332283  |
| 39               | 7                | 0              | -7.274955               | -2.201602 | 0.246238  |
| 40               | 8                | 0              | -7.967244               | -1.493198 | 0.944949  |
| 41               | 8                | 0              | -7.652569               | -3.206738 | -0.316851 |
| 42               | 7                | 0              | 5.884372                | -4.248925 | 0.183809  |
| 43               | 8                | 0              | 6.768700                | -4.303827 | -0.643132 |
| 44               | 8                | 0              | 5.735205                | -5.036117 | 1.093822  |
| 45               | 7                | 0              | 1.323576                | 6.376470  | 0.167512  |
| 46               | 8                | 0              | 0.691556                | 7.151540  | -0.517158 |
| 47               | 8                | 0              | 2.210771                | 6.688010  | 0.931677  |

## Structure 43d (CHCl<sub>3</sub>)

Energy (Hartrees): -1533.91285956

No imaginary frequencies

Standard orientation:

| Center<br>Number | Atomic<br>Number | Atomic<br>Type | Coordinates (Angstroms) |           |           |
|------------------|------------------|----------------|-------------------------|-----------|-----------|
|                  |                  |                | X                       | Y         | Z         |
| 1                | 6                | 0              | 1.357369                | 2.671886  | 0.729402  |
| 2                | 6                | 0              | 1.681761                | 4.013164  | 0.840051  |
| 3                | 6                | 0              | 0.977619                | 4.933507  | 0.073621  |
| 4                | 6                | 0              | -0.031574               | 4.553812  | -0.797592 |
| 5                | 6                | 0              | -0.339026               | 3.205385  | -0.901072 |
| 6                | 6                | 0              | 0.337079                | 2.247132  | -0.134363 |
| 7                | 1                | 0              | 1.891981                | 1.947353  | 1.328797  |
| 8                | 1                | 0              | 2.460700                | 4.347109  | 1.512375  |
| 9                | 1                | 0              | -0.550002               | 5.295249  | -1.390704 |
| 10               | 1                | 0              | -1.101286               | 2.890286  | -1.604007 |
| 11               | 6                | 0              | -0.050337               | 0.821029  | -0.215234 |
| 12               | 6                | 0              | -1.375126               | 0.511010  | -0.289927 |
| 13               | 6                | 0              | 0.951754                | -0.231971 | -0.173821 |
| 14               | 1                | 0              | 0.586702                | -1.254257 | -0.018305 |
| 15               | 1                | 0              | -1.323867               | -1.446989 | -0.914018 |
| 16               | 1                | 0              | -2.107706               | 1.304339  | -0.181588 |
| 17               | 7                | 0              | 2.205278                | -0.010693 | -0.303881 |
| 18               | 7                | 0              | -1.908039               | -0.724926 | -0.512109 |
| 19               | 6                | 0              | 3.096132                | -1.079687 | -0.154371 |
| 20               | 6                | 0              | 4.193332                | -1.145968 | -1.024173 |
| 21               | 6                | 0              | 2.956566                | -2.039939 | 0.858800  |
| 22               | 6                | 0              | 5.107804                | -2.178226 | -0.921756 |
| 23               | 1                | 0              | 4.307071                | -0.382663 | -1.784333 |
| 24               | 6                | 0              | 3.874387                | -3.071217 | 0.977056  |
| 25               | 1                | 0              | 2.144642                | -1.959357 | 1.572088  |
| 26               | 6                | 0              | 4.931156                | -3.128415 | 0.078808  |
| 27               | 1                | 0              | 5.950181                | -2.248630 | -1.596839 |
| 28               | 1                | 0              | 3.780532                | -3.815405 | 1.756835  |
| 29               | 6                | 0              | -3.238268               | -1.068428 | -0.298523 |
| 30               | 6                | 0              | -3.722380               | -2.253353 | -0.873273 |
| 31               | 6                | 0              | -4.088157               | -0.275786 | 0.484904  |
| 32               | 6                | 0              | -5.037397               | -2.631142 | -0.689485 |
| 33               | 1                | 0              | -3.059923               | -2.868179 | -1.472195 |
| 34               | 6                | 0              | -5.410092               | -0.645845 | 0.660028  |
| 35               | 1                | 0              | -3.716355               | 0.610057  | 0.982066  |
| 36               | 6                | 0              | -5.869877               | -1.815245 | 0.069828  |
| 37               | 1                | 0              | -5.422070               | -3.540697 | -1.131191 |
| 38               | 1                | 0              | -6.075194               | -0.043736 | 1.264785  |
| 39               | 7                | 0              | -7.264863               | -2.208473 | 0.264557  |
| 40               | 8                | 0              | -7.974914               | -1.483966 | 0.934582  |
| 41               | 8                | 0              | -7.645954               | -3.240033 | -0.254169 |
| 42               | 7                | 0              | 5.902641                | -4.220391 | 0.197400  |
| 43               | 8                | 0              | 6.803933                | -4.274038 | -0.615838 |
| 44               | 8                | 0              | 5.757452                | -5.019620 | 1.101435  |
| 45               | 7                | 0              | 1.315726                | 6.358834  | 0.187478  |
| 46               | 8                | 0              | 0.656886                | 7.154380  | -0.451939 |
| 47               | 8                | 0              | 2.235477                | 6.670132  | 0.917010  |

## Structure 43d (DMSO)

Energy (Hartrees): -1533.91397261

No imaginary frequencies

Standard orientation:

| Center<br>Number | Atomic<br>Number | Atomic<br>Type | Coordinates (Angstroms) |           |           |
|------------------|------------------|----------------|-------------------------|-----------|-----------|
|                  |                  |                | X                       | Y         | Z         |
| 1                | 6                | 0              | 1.363253                | 2.666940  | 0.758503  |
| 2                | 6                | 0              | 1.692692                | 4.008110  | 0.850655  |
| 3                | 6                | 0              | 0.992499                | 4.920434  | 0.069959  |
| 4                | 6                | 0              | -0.019446               | 4.530808  | -0.794796 |
| 5                | 6                | 0              | -0.331817               | 3.182313  | -0.879791 |
| 6                | 6                | 0              | 0.341977                | 2.232236  | -0.100473 |
| 7                | 1                | 0              | 1.890337                | 1.950319  | 1.374622  |
| 8                | 1                | 0              | 2.470408                | 4.345571  | 1.522822  |
| 9                | 1                | 0              | -0.540100               | 5.262428  | -1.398076 |
| 10               | 1                | 0              | -1.099962               | 2.862152  | -1.574123 |
| 11               | 6                | 0              | -0.046565               | 0.805641  | -0.155486 |
| 12               | 6                | 0              | -1.376332               | 0.500012  | -0.204178 |
| 13               | 6                | 0              | 0.958106                | -0.241123 | -0.125570 |
| 14               | 1                | 0              | 0.607664                | -1.265062 | 0.042832  |
| 15               | 1                | 0              | -1.320204               | -1.505566 | -0.630944 |
| 16               | 1                | 0              | -2.096320               | 1.307192  | -0.129236 |
| 17               | 7                | 0              | 2.208580                | -0.013231 | -0.295713 |
| 18               | 7                | 0              | -1.919345               | -0.736323 | -0.354606 |
| 19               | 6                | 0              | 3.106023                | -1.077326 | -0.160811 |
| 20               | 6                | 0              | 4.185712                | -1.146561 | -1.053246 |
| 21               | 6                | 0              | 2.992134                | -2.032085 | 0.861442  |
| 22               | 6                | 0              | 5.107097                | -2.173530 | -0.962852 |
| 23               | 1                | 0              | 4.281820                | -0.391483 | -1.824306 |
| 24               | 6                | 0              | 3.916176                | -3.058411 | 0.967167  |
| 25               | 1                | 0              | 2.191760                | -1.953878 | 1.587822  |
| 26               | 6                | 0              | 4.955975                | -3.117641 | 0.048103  |
| 27               | 1                | 0              | 5.933676                | -2.242180 | -1.657455 |
| 28               | 1                | 0              | 3.836140                | -3.797082 | 1.753923  |
| 29               | 6                | 0              | -3.262588               | -1.057644 | -0.200738 |
| 30               | 6                | 0              | -3.679862               | -2.331774 | -0.618618 |
| 31               | 6                | 0              | -4.192407               | -0.171608 | 0.362804  |
| 32               | 6                | 0              | -5.000474               | -2.711841 | -0.494632 |
| 33               | 1                | 0              | -2.955761               | -3.016745 | -1.045312 |
| 34               | 6                | 0              | -5.519086               | -0.546737 | 0.477247  |
| 35               | 1                | 0              | -3.892171               | 0.798387  | 0.735317  |
| 36               | 6                | 0              | -5.910243               | -1.808691 | 0.047203  |
| 37               | 1                | 0              | -5.325040               | -3.691991 | -0.817709 |
| 38               | 1                | 0              | -6.241769               | 0.131603  | 0.911233  |
| 39               | 7                | 0              | -7.309011               | -2.202548 | 0.180534  |
| 40               | 8                | 0              | -8.090155               | -1.399469 | 0.657379  |
| 41               | 8                | 0              | -7.630813               | -3.316330 | -0.191629 |
| 42               | 7                | 0              | 5.934952                | -4.201151 | 0.154511  |
| 43               | 8                | 0              | 6.825930                | -4.252718 | -0.672512 |
| 44               | 8                | 0              | 5.811297                | -4.999922 | 1.063859  |
| 45               | 7                | 0              | 1.336581                | 6.343796  | 0.163200  |
| 46               | 8                | 0              | 0.678884                | 7.136205  | -0.483694 |
| 47               | 8                | 0              | 2.262390                | 6.662658  | 0.884315  |

## Structure 43d (C<sub>2</sub>H<sub>5</sub>OH)

Energy (Hartrees): -1533.91276409

No imaginary frequencies

Standard orientation:

| Center<br>Number | Atomic<br>Number | Atomic<br>Type | Coordinates (Angstroms) |           |           |
|------------------|------------------|----------------|-------------------------|-----------|-----------|
|                  |                  |                | X                       | Y         | Z         |
| 1                | 6                | 0              | 1.346609                | 2.674619  | 0.765210  |
| 2                | 6                | 0              | 1.667746                | 4.017178  | 0.857919  |
| 3                | 6                | 0              | 0.970382                | 4.922926  | 0.066344  |
| 4                | 6                | 0              | -0.028634               | 4.526612  | -0.810937 |
| 5                | 6                | 0              | -0.332813               | 3.176502  | -0.894901 |
| 6                | 6                | 0              | 0.336580                | 2.233300  | -0.103544 |
| 7                | 1                | 0              | 1.869475                | 1.962194  | 1.389898  |
| 8                | 1                | 0              | 2.434842                | 4.360934  | 1.539113  |
| 9                | 1                | 0              | -0.544836               | 5.253522  | -1.423925 |
| 10               | 1                | 0              | -1.089781               | 2.848820  | -1.598105 |
| 11               | 6                | 0              | -0.046249               | 0.805306  | -0.154116 |
| 12               | 6                | 0              | -1.374131               | 0.495079  | -0.202010 |
| 13               | 6                | 0              | 0.963193                | -0.237221 | -0.121832 |
| 14               | 1                | 0              | 0.618447                | -1.260871 | 0.059624  |
| 15               | 1                | 0              | -1.309213               | -1.510543 | -0.629657 |
| 16               | 1                | 0              | -2.097713               | 1.299496  | -0.131346 |
| 17               | 7                | 0              | 2.210945                | -0.006808 | -0.306895 |
| 18               | 7                | 0              | -1.911662               | -0.745409 | -0.349230 |
| 19               | 6                | 0              | 3.110984                | -1.068095 | -0.170041 |
| 20               | 6                | 0              | 4.170434                | -1.158829 | -1.084737 |
| 21               | 6                | 0              | 3.018888                | -1.998055 | 0.876874  |
| 22               | 6                | 0              | 5.093687                | -2.183073 | -0.990097 |
| 23               | 1                | 0              | 4.249366                | -0.422601 | -1.875692 |
| 24               | 6                | 0              | 3.944410                | -3.021762 | 0.987252  |
| 25               | 1                | 0              | 2.234719                | -1.901187 | 1.618661  |
| 26               | 6                | 0              | 4.964289                | -3.102400 | 0.047032  |
| 27               | 1                | 0              | 5.903845                | -2.268240 | -1.702107 |
| 28               | 1                | 0              | 3.881995                | -3.740526 | 1.793718  |
| 29               | 6                | 0              | -3.252586               | -1.071694 | -0.194337 |
| 30               | 6                | 0              | -3.668074               | -2.344669 | -0.618873 |
| 31               | 6                | 0              | -4.182514               | -0.190588 | 0.377722  |
| 32               | 6                | 0              | -4.987322               | -2.727196 | -0.496116 |
| 33               | 1                | 0              | -2.943980               | -3.026054 | -1.051429 |
| 34               | 6                | 0              | -5.508116               | -0.566968 | 0.490462  |
| 35               | 1                | 0              | -3.881761               | 0.776122  | 0.758445  |
| 36               | 6                | 0              | -5.897684               | -1.827041 | 0.051344  |
| 37               | 1                | 0              | -5.311260               | -3.705395 | -0.826030 |
| 38               | 1                | 0              | -6.231187               | 0.107349  | 0.930273  |
| 39               | 7                | 0              | -7.292004               | -2.219569 | 0.177371  |
| 40               | 8                | 0              | -8.083512               | -1.414001 | 0.635321  |
| 41               | 8                | 0              | -7.615221               | -3.338474 | -0.181577 |
| 42               | 7                | 0              | 5.942682                | -4.179851 | 0.159993  |
| 43               | 8                | 0              | 6.840771                | -4.235953 | -0.660066 |
| 44               | 8                | 0              | 5.819885                | -4.981000 | 1.068585  |
| 45               | 7                | 0              | 1.301384                | 6.344943  | 0.164131  |
| 46               | 8                | 0              | 0.654590                | 7.136579  | -0.495839 |
| 47               | 8                | 0              | 2.208882                | 6.676632  | 0.903485  |

#### 4. Computational data: cartesian coordinates for all optimized structures at B3LYP/6311++G(d,p) level:

##### Structure 32a (vacuum)

Energy (Hartrees): -632.352282811

No imaginary frequencies

Standard orientation:

| Center<br>Number | Atomic<br>Number | Atomic<br>Type | Coordinates (Angstroms) |           |           |
|------------------|------------------|----------------|-------------------------|-----------|-----------|
|                  |                  |                | X                       | Y         | Z         |
| 1                | 6                | 0              | 2.139830                | 1.197425  | 0.708252  |
| 2                | 6                | 0              | 0.758351                | 1.281206  | 0.629954  |
| 3                | 6                | 0              | -0.005400               | 0.292261  | -0.018023 |
| 4                | 6                | 0              | 0.690998                | -0.782156 | -0.581852 |
| 5                | 6                | 0              | 2.080579                | -0.892245 | -0.494834 |
| 6                | 6                | 0              | 2.813839                | 0.105417  | 0.149616  |
| 7                | 1                | 0              | 2.718792                | 1.962185  | 1.212295  |
| 8                | 1                | 0              | 0.257598                | 2.120961  | 1.099114  |
| 9                | 1                | 0              | 0.143988                | -1.545717 | -1.124961 |
| 10               | 1                | 0              | 2.571703                | -1.742198 | -0.949639 |
| 11               | 6                | 0              | -1.483185               | 0.393754  | -0.099456 |
| 12               | 6                | 0              | -2.276958               | -0.705614 | 0.178156  |
| 13               | 1                | 0              | -1.806857               | -1.632286 | 0.499676  |
| 14               | 6                | 0              | -2.102945               | 1.639277  | -0.477774 |
| 15               | 1                | 0              | -1.410190               | 2.472231  | -0.697115 |
| 16               | 1                | 0              | -4.042450               | 0.145796  | -0.179344 |
| 17               | 7                | 0              | -3.611930               | -0.739993 | 0.093167  |
| 18               | 6                | 0              | -4.428921               | -1.869391 | 0.491759  |
| 19               | 1                | 0              | -5.156319               | -2.108923 | -0.288085 |
| 20               | 1                | 0              | -3.794753               | -2.743589 | 0.650270  |
| 21               | 1                | 0              | -4.971979               | -1.663754 | 1.420337  |
| 22               | 8                | 0              | -3.321785               | 1.829900  | -0.584453 |
| 23               | 8                | 0              | 4.174274                | 0.109101  | 0.284105  |
| 24               | 6                | 0              | 4.912026                | -0.971841 | -0.266818 |
| 25               | 1                | 0              | 4.780207                | -1.034858 | -1.352734 |
| 26               | 1                | 0              | 5.957311                | -0.764210 | -0.043202 |
| 27               | 1                | 0              | 4.627264                | -1.926249 | 0.190117  |

## Structure 32a (CHCl<sub>3</sub>)

Energy (Hartrees): -632.370670406

No imaginary frequencies

Standard orientation:

| Center<br>Number | Atomic<br>Number | Atomic<br>Type | Coordinates (Angstroms) |           |           |
|------------------|------------------|----------------|-------------------------|-----------|-----------|
|                  |                  |                | X                       | Y         | Z         |
| 1                | 6                | 0              | 2.143094                | 1.207792  | 0.694675  |
| 2                | 6                | 0              | 0.759948                | 1.292835  | 0.618971  |
| 3                | 6                | 0              | -0.007567               | 0.294124  | -0.010502 |
| 4                | 6                | 0              | 0.686374                | -0.795167 | -0.552471 |
| 5                | 6                | 0              | 2.076311                | -0.905519 | -0.468346 |
| 6                | 6                | 0              | 2.814162                | 0.104569  | 0.153170  |
| 7                | 1                | 0              | 2.720391                | 1.984127  | 1.184335  |
| 8                | 1                | 0              | 0.263395                | 2.143789  | 1.072934  |
| 9                | 1                | 0              | 0.137661                | -1.573978 | -1.071967 |
| 10               | 1                | 0              | 2.566167                | -1.766329 | -0.904282 |
| 11               | 6                | 0              | -1.486874               | 0.401920  | -0.097282 |
| 12               | 6                | 0              | -2.284140               | -0.703602 | 0.184856  |
| 13               | 1                | 0              | -1.813080               | -1.631609 | 0.498801  |
| 14               | 6                | 0              | -2.091369               | 1.643047  | -0.479455 |
| 15               | 1                | 0              | -1.393836               | 2.466242  | -0.714214 |
| 16               | 1                | 0              | -4.059183               | 0.136527  | -0.159491 |
| 17               | 7                | 0              | -3.612574               | -0.737946 | 0.116397  |
| 18               | 6                | 0              | -4.429537               | -1.889251 | 0.459499  |
| 19               | 1                | 0              | -5.072822               | -2.163099 | -0.380930 |
| 20               | 1                | 0              | -3.787528               | -2.737389 | 0.700744  |
| 21               | 1                | 0              | -5.062354               | -1.670065 | 1.324492  |
| 22               | 8                | 0              | -3.315591               | 1.853480  | -0.581114 |
| 23               | 8                | 0              | 4.174802                | 0.105640  | 0.280292  |
| 24               | 6                | 0              | 4.911734                | -0.977697 | -0.285035 |
| 25               | 1                | 0              | 4.766214                | -1.035219 | -1.368712 |
| 26               | 1                | 0              | 5.959488                | -0.766296 | -0.073866 |
| 27               | 1                | 0              | 4.636998                | -1.932343 | 0.175467  |

## Structure 32a (DMSO)

Energy (Hartrees): -632.369929614

No imaginary frequencies

Standard orientation:

| Center<br>Number | Atomic<br>Number | Atomic<br>Type | Coordinates (Angstroms) |           |           |
|------------------|------------------|----------------|-------------------------|-----------|-----------|
|                  |                  |                | X                       | Y         | Z         |
| 1                | 6                | 0              | 2.152285                | 1.243271  | 0.629353  |
| 2                | 6                | 0              | 0.767584                | 1.326511  | 0.568687  |
| 3                | 6                | 0              | -0.009521               | 0.303735  | -0.009430 |
| 4                | 6                | 0              | 0.678430                | -0.809184 | -0.512241 |
| 5                | 6                | 0              | 2.069228                | -0.917843 | -0.440280 |
| 6                | 6                | 0              | 2.817429                | 0.117640  | 0.126657  |
| 7                | 1                | 0              | 2.733247                | 2.039778  | 1.081271  |
| 8                | 1                | 0              | 0.279891                | 2.196370  | 0.995314  |
| 9                | 1                | 0              | 0.124320                | -1.612130 | -0.987215 |
| 10               | 1                | 0              | 2.551332                | -1.798843 | -0.843617 |
| 11               | 6                | 0              | -1.489328               | 0.409303  | -0.083648 |
| 12               | 6                | 0              | -2.281188               | -0.708356 | 0.177684  |
| 13               | 1                | 0              | -1.805185               | -1.641686 | 0.466435  |
| 14               | 6                | 0              | -2.097421               | 1.654338  | -0.441892 |
| 15               | 1                | 0              | -1.400734               | 2.480920  | -0.667298 |
| 16               | 1                | 0              | -4.065588               | 0.125472  | -0.140940 |
| 17               | 7                | 0              | -3.607405               | -0.748402 | 0.114871  |
| 18               | 6                | 0              | -4.414554               | -1.917575 | 0.424010  |
| 19               | 1                | 0              | -5.043661               | -2.179908 | -0.430582 |
| 20               | 1                | 0              | -3.763495               | -2.760889 | 0.656157  |
| 21               | 1                | 0              | -5.060616               | -1.720333 | 1.283974  |
| 22               | 8                | 0              | -3.322514               | 1.868627  | -0.534200 |
| 23               | 8                | 0              | 4.178153                | 0.122997  | 0.232351  |
| 24               | 6                | 0              | 4.898575                | -1.020814 | -0.233284 |
| 25               | 1                | 0              | 4.748621                | -1.178481 | -1.305954 |
| 26               | 1                | 0              | 5.950114                | -0.807179 | -0.044905 |
| 27               | 1                | 0              | 4.609362                | -1.923422 | 0.314372  |



## Structure 32a (C<sub>2</sub>H<sub>5</sub>OH)

Energy (Hartrees): -632.372936422

No imaginary frequencies

Standard orientation:

| Center<br>Number | Atomic<br>Number | Atomic<br>Type | Coordinates (Angstroms) |           |           |
|------------------|------------------|----------------|-------------------------|-----------|-----------|
|                  |                  |                | X                       | Y         | Z         |
| 1                | 6                | 0              | 2.148270                | 1.232639  | 0.652032  |
| 2                | 6                | 0              | 0.763847                | 1.318094  | 0.588389  |
| 3                | 6                | 0              | -0.010431               | 0.304737  | -0.008216 |
| 4                | 6                | 0              | 0.676385                | -0.801750 | -0.525681 |
| 5                | 6                | 0              | 2.066833                | -0.912626 | -0.451642 |
| 6                | 6                | 0              | 2.810902                | 0.113922  | 0.133685  |
| 7                | 1                | 0              | 2.729629                | 2.021313  | 1.117332  |
| 8                | 1                | 0              | 0.274703                | 2.181582  | 1.026357  |
| 9                | 1                | 0              | 0.122413                | -1.596399 | -1.014718 |
| 10               | 1                | 0              | 2.550758                | -1.787112 | -0.866695 |
| 11               | 6                | 0              | -1.490632               | 0.413839  | -0.088023 |
| 12               | 6                | 0              | -2.283778               | -0.704110 | 0.182271  |
| 13               | 1                | 0              | -1.804274               | -1.631971 | 0.482304  |
| 14               | 6                | 0              | -2.089030               | 1.653303  | -0.454500 |
| 15               | 1                | 0              | -1.393369               | 2.476809  | -0.685552 |
| 16               | 1                | 0              | -4.073199               | 0.114739  | -0.151140 |
| 17               | 7                | 0              | -3.607202               | -0.750550 | 0.117157  |
| 18               | 6                | 0              | -4.410032               | -1.921946 | 0.433348  |
| 19               | 1                | 0              | -5.037746               | -2.189715 | -0.420323 |
| 20               | 1                | 0              | -3.756534               | -2.761730 | 0.670487  |
| 21               | 1                | 0              | -5.056863               | -1.720517 | 1.291562  |
| 22               | 8                | 0              | -3.320357               | 1.873679  | -0.549119 |
| 23               | 8                | 0              | 4.177019                | 0.115921  | 0.245392  |
| 24               | 6                | 0              | 4.903912                | -1.013249 | -0.250481 |
| 25               | 1                | 0              | 4.754955                | -1.138457 | -1.327189 |
| 26               | 1                | 0              | 5.953555                | -0.798738 | -0.052827 |
| 27               | 1                | 0              | 4.615626                | -1.929870 | 0.273035  |

### Structure 32b (vacuum)

Energy (Hartrees): -632.345481740

No imaginary frequencies

Standard orientation:

| Center<br>Number | Atomic<br>Number | Atomic<br>Type | Coordinates (Angstroms) |           |           |
|------------------|------------------|----------------|-------------------------|-----------|-----------|
|                  |                  |                | X                       | Y         | Z         |
| 1                | 6                | 0              | -1.881130               | -1.067195 | 1.002489  |
| 2                | 6                | 0              | -0.506087               | -1.205865 | 0.893027  |
| 3                | 6                | 0              | 0.239668                | -0.452679 | -0.032945 |
| 4                | 6                | 0              | -0.466346               | 0.444619  | -0.842732 |
| 5                | 6                | 0              | -1.850146               | 0.604907  | -0.737909 |
| 6                | 6                | 0              | -2.565534               | -0.156532 | 0.188784  |
| 7                | 1                | 0              | -2.447669               | -1.651105 | 1.718136  |
| 8                | 1                | 0              | 0.006267                | -1.905449 | 1.544549  |
| 9                | 1                | 0              | 0.067097                | 1.014867  | -1.596344 |
| 10               | 1                | 0              | -2.351525               | 1.305920  | -1.392105 |
| 11               | 6                | 0              | 1.708683                | -0.627934 | -0.154520 |
| 12               | 6                | 0              | 2.604257                | 0.400109  | -0.044771 |
| 13               | 1                | 0              | 3.656874                | 0.150526  | -0.148054 |
| 14               | 6                | 0              | 2.261187                | -1.963547 | -0.380396 |
| 15               | 1                | 0              | 1.495522                | -2.762638 | -0.464224 |
| 16               | 1                | 0              | 1.373230                | 1.952158  | 0.364932  |
| 17               | 7                | 0              | 2.334894                | 1.704817  | 0.175177  |
| 18               | 6                | 0              | 3.355352                | 2.684355  | 0.512521  |
| 19               | 1                | 0              | 3.515455                | 2.763495  | 1.594349  |
| 20               | 1                | 0              | 4.298232                | 2.398315  | 0.044480  |
| 21               | 1                | 0              | 3.070031                | 3.666150  | 0.129256  |
| 22               | 8                | 0              | 3.445756                | -2.247761 | -0.482247 |
| 23               | 8                | 0              | -3.916409               | -0.088008 | 0.373721  |
| 24               | 6                | 0              | -4.669313               | 0.799144  | -0.441653 |
| 25               | 1                | 0              | -4.360557               | 1.839839  | -0.292915 |
| 26               | 1                | 0              | -4.579718               | 0.540488  | -1.502374 |
| 27               | 1                | 0              | -5.705802               | 0.683569  | -0.129086 |

## Structure 32b (CHCl<sub>3</sub>)

Energy (Hartrees): -632.366413590

No imaginary frequencies

Standard orientation:

| Center<br>Number | Atomic<br>Number | Atomic<br>Type | Coordinates (Angstroms) |           |           |
|------------------|------------------|----------------|-------------------------|-----------|-----------|
|                  |                  |                | X                       | Y         | Z         |
| 1                | 6                | 0              | -1.893113               | -1.109851 | 0.959574  |
| 2                | 6                | 0              | -0.515847               | -1.244956 | 0.855822  |
| 3                | 6                | 0              | 0.237612                | -0.458567 | -0.036088 |
| 4                | 6                | 0              | -0.463072               | 0.469927  | -0.816835 |
| 5                | 6                | 0              | -1.847432               | 0.627731  | -0.716314 |
| 6                | 6                | 0              | -2.571148               | -0.167651 | 0.176069  |
| 7                | 1                | 0              | -2.461016               | -1.721932 | 1.651275  |
| 8                | 1                | 0              | -0.010805               | -1.969285 | 1.486142  |
| 9                | 1                | 0              | 0.073797                | 1.075414  | -1.540153 |
| 10               | 1                | 0              | -2.343211               | 1.355852  | -1.344893 |
| 11               | 6                | 0              | 1.709959                | -0.632029 | -0.150870 |
| 12               | 6                | 0              | 2.612351                | 0.401868  | -0.014207 |
| 13               | 1                | 0              | 3.665874                | 0.160226  | -0.122234 |
| 14               | 6                | 0              | 2.251399                | -1.952928 | -0.391758 |
| 15               | 1                | 0              | 1.485033                | -2.743796 | -0.512479 |
| 16               | 1                | 0              | 1.387369                | 1.957799  | 0.402336  |
| 17               | 7                | 0              | 2.350074                | 1.685422  | 0.249645  |
| 18               | 6                | 0              | 3.366919                | 2.703554  | 0.466564  |
| 19               | 1                | 0              | 3.402355                | 3.007327  | 1.517402  |
| 20               | 1                | 0              | 4.341487                | 2.305373  | 0.184212  |
| 21               | 1                | 0              | 3.158889                | 3.584543  | -0.145818 |
| 22               | 8                | 0              | 3.443225                | -2.262151 | -0.477793 |
| 23               | 8                | 0              | -3.922768               | -0.101725 | 0.352713  |
| 24               | 6                | 0              | -4.667472               | 0.841972  | -0.417465 |
| 25               | 1                | 0              | -4.346513               | 1.867907  | -0.209836 |
| 26               | 1                | 0              | -4.582671               | 0.637329  | -1.489525 |
| 27               | 1                | 0              | -5.705693               | 0.721880  | -0.110262 |

## Structure 32b (DMSO)

Energy (Hartrees): -632.366632581

No imaginary frequencies

Standard orientation:

| Center<br>Number | Atomic<br>Number | Atomic<br>Type | Coordinates (Angstroms) |           |           |
|------------------|------------------|----------------|-------------------------|-----------|-----------|
|                  |                  |                | X                       | Y         | Z         |
| 1                | 6                | 0              | -1.908293               | -1.160959 | 0.900108  |
| 2                | 6                | 0              | -0.529668               | -1.292072 | 0.802769  |
| 3                | 6                | 0              | 0.235140                | -0.455214 | -0.032527 |
| 4                | 6                | 0              | -0.456864               | 0.523343  | -0.759240 |
| 5                | 6                | 0              | -1.841756               | 0.677975  | -0.662763 |
| 6                | 6                | 0              | -2.578127               | -0.171101 | 0.168927  |
| 7                | 1                | 0              | -2.480674               | -1.815154 | 1.548547  |
| 8                | 1                | 0              | -0.033548               | -2.054819 | 1.393696  |
| 9                | 1                | 0              | 0.085594                | 1.175619  | -1.436131 |
| 10               | 1                | 0              | -2.328267               | 1.448231  | -1.246641 |
| 11               | 6                | 0              | 1.706413                | -0.632121 | -0.145675 |
| 12               | 6                | 0              | 2.617301                | 0.398830  | -0.004822 |
| 13               | 1                | 0              | 3.669284                | 0.150817  | -0.111788 |
| 14               | 6                | 0              | 2.237638                | -1.953431 | -0.392864 |
| 15               | 1                | 0              | 1.463085                | -2.734349 | -0.527746 |
| 16               | 1                | 0              | 1.407927                | 1.972716  | 0.397116  |
| 17               | 7                | 0              | 2.368097                | 1.679416  | 0.264483  |
| 18               | 6                | 0              | 3.394043                | 2.695253  | 0.449461  |
| 19               | 1                | 0              | 3.373131                | 3.082028  | 1.472206  |
| 20               | 1                | 0              | 4.373554                | 2.257395  | 0.258076  |
| 21               | 1                | 0              | 3.236625                | 3.526984  | -0.242221 |
| 22               | 8                | 0              | 3.427011                | -2.279429 | -0.474631 |
| 23               | 8                | 0              | -3.930783               | -0.114073 | 0.330666  |
| 24               | 6                | 0              | -4.661028               | 0.874282  | -0.401480 |
| 25               | 1                | 0              | -4.351309               | 1.886251  | -0.122607 |
| 26               | 1                | 0              | -4.543854               | 0.736835  | -1.480773 |
| 27               | 1                | 0              | -5.706850               | 0.730851  | -0.132771 |

## Structure 32b (C<sub>2</sub>H<sub>5</sub>OH)

Energy (Hartrees): -632.370471028

No imaginary frequencies

Standard orientation:

| Center<br>Number | Atomic<br>Number | Atomic<br>Type | Coordinates (Angstroms) |           |           |
|------------------|------------------|----------------|-------------------------|-----------|-----------|
|                  |                  |                | X                       | Y         | Z         |
| 1                | 6                | 0              | -1.891591               | -1.116050 | 0.955577  |
| 2                | 6                | 0              | -0.513525               | -1.249897 | 0.852192  |
| 3                | 6                | 0              | 0.238460                | -0.459015 | -0.036303 |
| 4                | 6                | 0              | -0.461072               | 0.474601  | -0.812164 |
| 5                | 6                | 0              | -1.845383               | 0.631183  | -0.711793 |
| 6                | 6                | 0              | -2.567691               | -0.170091 | 0.175768  |
| 7                | 1                | 0              | -2.457769               | -1.732495 | 1.645350  |
| 8                | 1                | 0              | -0.008626               | -1.977252 | 1.479362  |
| 9                | 1                | 0              | 0.074851                | 1.088303  | -1.529156 |
| 10               | 1                | 0              | -2.340994               | 1.364585  | -1.334283 |
| 11               | 6                | 0              | 1.711599                | -0.634354 | -0.151806 |
| 12               | 6                | 0              | 2.617581                | 0.405060  | -0.005462 |
| 13               | 1                | 0              | 3.672849                | 0.170779  | -0.109167 |
| 14               | 6                | 0              | 2.241160                | -1.945610 | -0.394903 |
| 15               | 1                | 0              | 1.476196                | -2.733210 | -0.521903 |
| 16               | 1                | 0              | 1.386114                | 1.958180  | 0.391969  |
| 17               | 7                | 0              | 2.351873                | 1.677407  | 0.269398  |
| 18               | 6                | 0              | 3.362144                | 2.710162  | 0.454299  |
| 19               | 1                | 0              | 3.317860                | 3.109050  | 1.471296  |
| 20               | 1                | 0              | 4.350669                | 2.284321  | 0.284077  |
| 21               | 1                | 0              | 3.202009                | 3.530019  | -0.250648 |
| 22               | 8                | 0              | 3.440738                | -2.271179 | -0.481419 |
| 23               | 8                | 0              | -3.923337               | -0.104251 | 0.351080  |
| 24               | 6                | 0              | -4.666876               | 0.847163  | -0.418984 |
| 25               | 1                | 0              | -4.340182               | 1.869360  | -0.206503 |
| 26               | 1                | 0              | -4.578972               | 0.642881  | -1.490152 |
| 27               | 1                | 0              | -5.705164               | 0.728174  | -0.111844 |

### Structure 32c (vacuum)

Energy (Hartrees): -632.346504613

No imaginary frequencies

Standard orientation:

| Center<br>Number | Atomic<br>Number | Atomic<br>Type | Coordinates (Angstroms) |           |           |
|------------------|------------------|----------------|-------------------------|-----------|-----------|
|                  |                  |                | X                       | Y         | Z         |
| 1                | 6                | 0              | 1.796401                | 1.012927  | 0.954594  |
| 2                | 6                | 0              | 0.431442                | 1.209621  | 0.828848  |
| 3                | 6                | 0              | -0.340539               | 0.428780  | -0.050746 |
| 4                | 6                | 0              | 0.325877                | -0.538369 | -0.809902 |
| 5                | 6                | 0              | 1.702735                | -0.748472 | -0.694023 |
| 6                | 6                | 0              | 2.444274                | 0.029394  | 0.196458  |
| 7                | 1                | 0              | 2.387401                | 1.617176  | 1.632525  |
| 8                | 1                | 0              | -0.048918               | 1.986798  | 1.409104  |
| 9                | 1                | 0              | -0.227612               | -1.125221 | -1.535774 |
| 10               | 1                | 0              | 2.176106                | -1.501368 | -1.310199 |
| 11               | 6                | 0              | -1.802778               | 0.641751  | -0.178571 |
| 12               | 6                | 0              | -2.721844               | -0.367631 | -0.089255 |
| 13               | 1                | 0              | -3.773692               | -0.114496 | -0.200648 |
| 14               | 6                | 0              | -2.357129               | 1.976840  | -0.369150 |
| 15               | 1                | 0              | -3.466309               | 1.989321  | -0.471017 |
| 16               | 1                | 0              | -1.533477               | -1.944610 | 0.336995  |
| 17               | 7                | 0              | -2.485579               | -1.684946 | 0.116888  |
| 18               | 6                | 0              | -3.532704               | -2.623014 | 0.489847  |
| 19               | 1                | 0              | -3.741751               | -2.614711 | 1.566617  |
| 20               | 1                | 0              | -4.452036               | -2.372895 | -0.042818 |
| 21               | 1                | 0              | -3.240462               | -3.633553 | 0.199449  |
| 22               | 8                | 0              | -1.733318               | 3.022349  | -0.414293 |
| 23               | 8                | 0              | 3.790450                | -0.086234 | 0.393724  |
| 24               | 6                | 0              | 4.508473                | -1.043255 | -0.371611 |
| 25               | 1                | 0              | 4.154489                | -2.061402 | -0.174524 |
| 26               | 1                | 0              | 4.435476                | -0.833749 | -1.444444 |
| 27               | 1                | 0              | 5.547536                | -0.957018 | -0.057867 |

## Structure 32c (CHCl<sub>3</sub>)

Energy (Hartrees): -632.368716106

No imaginary frequencies

Standard orientation:

| Center<br>Number | Atomic<br>Number | Atomic<br>Type | Coordinates (Angstroms) |           |           |
|------------------|------------------|----------------|-------------------------|-----------|-----------|
|                  |                  |                | X                       | Y         | Z         |
| 1                | 6                | 0              | 1.777901                | 0.882805  | 1.088714  |
| 2                | 6                | 0              | 0.412244                | 1.089786  | 0.964576  |
| 3                | 6                | 0              | -0.341302               | 0.431748  | -0.023663 |
| 4                | 6                | 0              | 0.341066                | -0.432972 | -0.885985 |
| 5                | 6                | 0              | 1.716455                | -0.655175 | -0.773481 |
| 6                | 6                | 0              | 2.441773                | 0.005872  | 0.220385  |
| 7                | 1                | 0              | 2.350721                | 1.395164  | 1.853521  |
| 8                | 1                | 0              | -0.081729               | 1.774256  | 1.644482  |
| 9                | 1                | 0              | -0.200959               | -0.936512 | -1.680050 |
| 10               | 1                | 0              | 2.202901                | -1.327075 | -1.468270 |
| 11               | 6                | 0              | -1.805849               | 0.660965  | -0.150372 |
| 12               | 6                | 0              | -2.735943               | -0.351238 | -0.042421 |
| 13               | 1                | 0              | -3.787378               | -0.097941 | -0.154223 |
| 14               | 6                | 0              | -2.343709               | 1.979305  | -0.374603 |
| 15               | 1                | 0              | -3.451658               | 2.008939  | -0.444754 |
| 16               | 1                | 0              | -1.544883               | -1.940066 | 0.346326  |
| 17               | 7                | 0              | -2.501602               | -1.647615 | 0.193554  |
| 18               | 6                | 0              | -3.539873               | -2.648016 | 0.388204  |
| 19               | 1                | 0              | -3.595748               | -2.962537 | 1.435101  |
| 20               | 1                | 0              | -4.503604               | -2.229494 | 0.097493  |
| 21               | 1                | 0              | -3.341632               | -3.526396 | -0.230936 |
| 22               | 8                | 0              | -1.708439               | 3.027602  | -0.490738 |
| 23               | 8                | 0              | 3.784307                | -0.133641 | 0.422416  |
| 24               | 6                | 0              | 4.521618                | -0.990447 | -0.449287 |
| 25               | 1                | 0              | 4.167451                | -2.024587 | -0.387214 |
| 26               | 1                | 0              | 4.470023                | -0.643344 | -1.486180 |
| 27               | 1                | 0              | 5.554473                | -0.944585 | -0.106012 |

## Structure 32c (DMSO)

Energy (Hartrees): -632.370008220

No imaginary frequencies

Standard orientation:

| Center<br>Number | Atomic<br>Number | Atomic<br>Type | Coordinates (Angstroms) |           |           |
|------------------|------------------|----------------|-------------------------|-----------|-----------|
|                  |                  |                | X                       | Y         | Z         |
| 1                | 6                | 0              | 1.777463                | 0.869895  | 1.104889  |
| 2                | 6                | 0              | 0.410399                | 1.074274  | 0.983280  |
| 3                | 6                | 0              | -0.340497               | 0.434925  | -0.019316 |
| 4                | 6                | 0              | 0.345820                | -0.412833 | -0.895667 |
| 5                | 6                | 0              | 1.721990                | -0.632981 | -0.786353 |
| 6                | 6                | 0              | 2.445936                | 0.011879  | 0.220072  |
| 7                | 1                | 0              | 2.344704                | 1.366099  | 1.884716  |
| 8                | 1                | 0              | -0.086797               | 1.738278  | 1.681451  |
| 9                | 1                | 0              | -0.194851               | -0.911185 | -1.693889 |
| 10               | 1                | 0              | 2.209229                | -1.295583 | -1.489472 |
| 11               | 6                | 0              | -1.805942               | 0.662590  | -0.140217 |
| 12               | 6                | 0              | -2.736302               | -0.354238 | -0.029089 |
| 13               | 1                | 0              | -3.788386               | -0.100661 | -0.132281 |
| 14               | 6                | 0              | -2.346215               | 1.975393  | -0.368329 |
| 15               | 1                | 0              | -3.454660               | 2.001866  | -0.420677 |
| 16               | 1                | 0              | -1.542640               | -1.949891 | 0.329874  |
| 17               | 7                | 0              | -2.500318               | -1.646347 | 0.202602  |
| 18               | 6                | 0              | -3.537082               | -2.654137 | 0.369679  |
| 19               | 1                | 0              | -3.538813               | -3.043148 | 1.391997  |
| 20               | 1                | 0              | -4.509608               | -2.208312 | 0.161495  |
| 21               | 1                | 0              | -3.375128               | -3.485693 | -0.320877 |
| 22               | 8                | 0              | -1.715608               | 3.027056  | -0.510599 |
| 23               | 8                | 0              | 3.787049                | -0.128248 | 0.418645  |
| 24               | 6                | 0              | 4.515327                | -0.997411 | -0.453146 |
| 25               | 1                | 0              | 4.145183                | -2.025372 | -0.390679 |
| 26               | 1                | 0              | 4.468778                | -0.650763 | -1.490068 |
| 27               | 1                | 0              | 5.548311                | -0.965809 | -0.108980 |



## Structure 32c (C<sub>2</sub>H<sub>5</sub>OH)

Energy (Hartrees):

No imaginary frequencies

Standard orientation:

| Center<br>Number | Atomic<br>Number | Atomic<br>Type | Coordinates (Angstroms) |           |           |
|------------------|------------------|----------------|-------------------------|-----------|-----------|
|                  |                  |                | X                       | Y         | Z         |
| 1                | 6                | 0              | 1.759488                | 0.771182  | 1.174103  |
| 2                | 6                | 0              | 0.394414                | 0.986550  | 1.047416  |
| 3                | 6                | 0              | -0.340309               | 0.420594  | -0.008948 |
| 4                | 6                | 0              | 0.354126                | -0.370492 | -0.930294 |
| 5                | 6                | 0              | 1.727777                | -0.601409 | -0.815909 |
| 6                | 6                | 0              | 2.436150                | -0.024452 | 0.240375  |
| 7                | 1                | 0              | 2.317568                | 1.214126  | 1.991745  |
| 8                | 1                | 0              | -0.112540               | 1.603937  | 1.781159  |
| 9                | 1                | 0              | -0.177390               | -0.811895 | -1.767234 |
| 10               | 1                | 0              | 2.225070                | -1.216728 | -1.553914 |
| 11               | 6                | 0              | -1.801976               | 0.674182  | -0.142901 |
| 12               | 6                | 0              | -2.752862               | -0.328169 | -0.035488 |
| 13               | 1                | 0              | -3.800236               | -0.059319 | -0.146259 |
| 14               | 6                | 0              | -2.310919               | 1.988076  | -0.373340 |
| 15               | 1                | 0              | -3.413459               | 2.051180  | -0.439986 |
| 16               | 1                | 0              | -1.578230               | -1.934916 | 0.319744  |
| 17               | 7                | 0              | -2.533776               | -1.617334 | 0.207275  |
| 18               | 6                | 0              | -3.580331               | -2.622436 | 0.331406  |
| 19               | 1                | 0              | -3.509667               | -3.125607 | 1.298909  |
| 20               | 1                | 0              | -4.555003               | -2.141376 | 0.253515  |
| 21               | 1                | 0              | -3.492229               | -3.372254 | -0.459781 |
| 22               | 8                | 0              | -1.645085               | 3.031435  | -0.505120 |
| 23               | 8                | 0              | 3.780626                | -0.175530 | 0.444402  |
| 24               | 6                | 0              | 4.533888                | -0.947066 | -0.498331 |
| 25               | 1                | 0              | 4.192511                | -1.986178 | -0.521510 |
| 26               | 1                | 0              | 4.473854                | -0.513017 | -1.500714 |
| 27               | 1                | 0              | 5.565169                | -0.913219 | -0.149388 |

### Structure 32d (vacuum)

Energy (Hartrees): -632.338543040

No imaginary frequencies

Standard orientation:

| Center<br>Number | Atomic<br>Number | Atomic<br>Type | Coordinates (Angstroms) |           |           |
|------------------|------------------|----------------|-------------------------|-----------|-----------|
|                  |                  |                | X                       | Y         | Z         |
| 1                | 6                | 0              | 2.034593                | 1.094496  | 0.744057  |
| 2                | 6                | 0              | 0.661377                | 1.241448  | 0.645023  |
| 3                | 6                | 0              | -0.129060               | 0.288767  | -0.025185 |
| 4                | 6                | 0              | 0.531775                | -0.794983 | -0.611463 |
| 5                | 6                | 0              | 1.915659                | -0.960899 | -0.513810 |
| 6                | 6                | 0              | 2.674567                | -0.011263 | 0.170204  |
| 7                | 1                | 0              | 2.637369                | 1.829400  | 1.264309  |
| 8                | 1                | 0              | 0.190072                | 2.108110  | 1.088902  |
| 9                | 1                | 0              | -0.036246               | -1.522285 | -1.182127 |
| 10               | 1                | 0              | 2.380050                | -1.814151 | -0.989767 |
| 11               | 6                | 0              | -1.606420               | 0.415074  | -0.098486 |
| 12               | 6                | 0              | -2.381337               | -0.703793 | 0.087846  |
| 13               | 1                | 0              | -1.884491               | -1.617853 | 0.404341  |
| 14               | 6                | 0              | -2.232538               | 1.707445  | -0.340407 |
| 15               | 1                | 0              | -3.345855               | 1.706523  | -0.305274 |
| 16               | 1                | 0              | -4.257875               | -0.067910 | -0.393157 |
| 17               | 7                | 0              | -3.715981               | -0.869232 | -0.107757 |
| 18               | 6                | 0              | -4.454593               | -1.966310 | 0.498891  |
| 19               | 1                | 0              | -5.357222               | -2.164687 | -0.081209 |
| 20               | 1                | 0              | -3.838095               | -2.867526 | 0.485019  |
| 21               | 1                | 0              | -4.741594               | -1.760260 | 1.537321  |
| 22               | 8                | 0              | -1.662718               | 2.765549  | -0.545678 |
| 23               | 8                | 0              | 4.031792                | -0.063679 | 0.324720  |
| 24               | 6                | 0              | 4.736196                | -1.155325 | -0.247322 |
| 25               | 1                | 0              | 4.619206                | -1.181282 | -1.336491 |
| 26               | 1                | 0              | 5.785095                | -0.995254 | -0.002249 |
| 27               | 1                | 0              | 4.407555                | -2.111120 | 0.176248  |

## Structure 32d (CHCl<sub>3</sub>)

Energy (Hartrees): -632.361282855

No imaginary frequencies

Standard orientation:

| Center<br>Number | Atomic<br>Number | Atomic<br>Type | Coordinates (Angstroms) |           |           |
|------------------|------------------|----------------|-------------------------|-----------|-----------|
|                  |                  |                | X                       | Y         | Z         |
| 1                | 6                | 0              | 2.037744                | 1.069697  | 0.789574  |
| 2                | 6                | 0              | 0.662506                | 1.218460  | 0.697064  |
| 3                | 6                | 0              | -0.131671               | 0.288024  | -0.000230 |
| 4                | 6                | 0              | 0.528243                | -0.785119 | -0.609685 |
| 5                | 6                | 0              | 1.912910                | -0.954401 | -0.519174 |
| 6                | 6                | 0              | 2.676132                | -0.020546 | 0.183074  |
| 7                | 1                | 0              | 2.637828                | 1.791980  | 1.331788  |
| 8                | 1                | 0              | 0.193353                | 2.068853  | 1.175828  |
| 9                | 1                | 0              | -0.042278               | -1.504774 | -1.187696 |
| 10               | 1                | 0              | 2.376597                | -1.798180 | -1.012794 |
| 11               | 6                | 0              | -1.609278               | 0.431635  | -0.079843 |
| 12               | 6                | 0              | -2.400831               | -0.685796 | 0.128546  |
| 13               | 1                | 0              | -1.910972               | -1.597696 | 0.461285  |
| 14               | 6                | 0              | -2.215649               | 1.709531  | -0.361335 |
| 15               | 1                | 0              | -3.324166               | 1.725255  | -0.328720 |
| 16               | 1                | 0              | -4.269799               | -0.045011 | -0.366098 |
| 17               | 7                | 0              | -3.724049               | -0.832724 | -0.045663 |
| 18               | 6                | 0              | -4.471515               | -1.984372 | 0.438955  |
| 19               | 1                | 0              | -5.281574               | -2.214016 | -0.255522 |
| 20               | 1                | 0              | -3.807475               | -2.847959 | 0.497723  |
| 21               | 1                | 0              | -4.899189               | -1.803559 | 1.431202  |
| 22               | 8                | 0              | -1.631412               | 2.763708  | -0.613707 |
| 23               | 8                | 0              | 4.033783                | -0.078853 | 0.327705  |
| 24               | 6                | 0              | 4.738049                | -1.150182 | -0.298247 |
| 25               | 1                | 0              | 4.601031                | -1.136210 | -1.384493 |
| 26               | 1                | 0              | 5.790587                | -0.989039 | -0.067492 |
| 27               | 1                | 0              | 4.425598                | -2.121001 | 0.100440  |

## Structure 32d (DMSO)

Energy (Hartrees): -632.362888714

No imaginary frequencies

Standard orientation:

| Center<br>Number | Atomic<br>Number | Atomic<br>Type | Coordinates (Angstroms) |           |           |
|------------------|------------------|----------------|-------------------------|-----------|-----------|
|                  |                  |                | X                       | Y         | Z         |
| 1                | 6                | 0              | 2.042547                | 1.077627  | 0.782547  |
| 2                | 6                | 0              | 0.666273                | 1.229286  | 0.694346  |
| 3                | 6                | 0              | -0.134399               | 0.298691  | 0.004070  |
| 4                | 6                | 0              | 0.521886                | -0.781792 | -0.598391 |
| 5                | 6                | 0              | 1.906530                | -0.955019 | -0.511458 |
| 6                | 6                | 0              | 2.677160                | -0.018236 | 0.180464  |
| 7                | 1                | 0              | 2.644041                | 1.801359  | 1.321797  |
| 8                | 1                | 0              | 0.201231                | 2.080841  | 1.175505  |
| 9                | 1                | 0              | -0.052378               | -1.509006 | -1.163101 |
| 10               | 1                | 0              | 2.363682                | -1.807109 | -0.996932 |
| 11               | 6                | 0              | -1.612267               | 0.445241  | -0.071167 |
| 12               | 6                | 0              | -2.399647               | -0.680520 | 0.140070  |
| 13               | 1                | 0              | -1.899859               | -1.591319 | 0.459565  |
| 14               | 6                | 0              | -2.220526               | 1.716779  | -0.359942 |
| 15               | 1                | 0              | -3.328102               | 1.727917  | -0.330868 |
| 16               | 1                | 0              | -4.278470               | -0.047586 | -0.322112 |
| 17               | 7                | 0              | -3.719036               | -0.829983 | -0.009410 |
| 18               | 6                | 0              | -4.448735               | -2.019161 | 0.407436  |
| 19               | 1                | 0              | -5.185517               | -2.284879 | -0.353118 |
| 20               | 1                | 0              | -3.749895               | -2.847485 | 0.527741  |
| 21               | 1                | 0              | -4.967784               | -1.855219 | 1.357353  |
| 22               | 8                | 0              | -1.639255               | 2.774143  | -0.622803 |
| 23               | 8                | 0              | 4.033459                | -0.080549 | 0.319015  |
| 24               | 6                | 0              | 4.727491                | -1.164448 | -0.303673 |
| 25               | 1                | 0              | 4.581964                | -1.159146 | -1.388492 |
| 26               | 1                | 0              | 5.782656                | -1.008975 | -0.081872 |
| 27               | 1                | 0              | 4.410163                | -2.128958 | 0.104896  |

## Structure 32d (C<sub>2</sub>H<sub>5</sub>OH)

Energy (Hartrees): -632.366841950

No imaginary frequencies

Standard orientation:

| Center<br>Number | Atomic<br>Number | Atomic<br>Type | Coordinates (Angstroms) |           |           |
|------------------|------------------|----------------|-------------------------|-----------|-----------|
|                  |                  |                | X                       | Y         | Z         |
| 1                | 6                | 0              | 2.036178                | 1.053064  | 0.824648  |
| 2                | 6                | 0              | 0.660117                | 1.207626  | 0.736068  |
| 3                | 6                | 0              | -0.134743               | 0.304610  | 0.005065  |
| 4                | 6                | 0              | 0.522616                | -0.751542 | -0.636991 |
| 5                | 6                | 0              | 1.906437                | -0.928030 | -0.550023 |
| 6                | 6                | 0              | 2.670350                | -0.018703 | 0.182683  |
| 7                | 1                | 0              | 2.635634                | 1.753345  | 1.396317  |
| 8                | 1                | 0              | 0.192257                | 2.035690  | 1.255215  |
| 9                | 1                | 0              | -0.050192               | -1.454988 | -1.232526 |
| 10               | 1                | 0              | 2.367536                | -1.760136 | -1.065419 |
| 11               | 6                | 0              | -1.613909               | 0.451133  | -0.071192 |
| 12               | 6                | 0              | -2.400816               | -0.677433 | 0.150518  |
| 13               | 1                | 0              | -1.897428               | -1.582049 | 0.481452  |
| 14               | 6                | 0              | -2.220134               | 1.710251  | -0.370908 |
| 15               | 1                | 0              | -3.324738               | 1.731344  | -0.344925 |
| 16               | 1                | 0              | -4.277679               | -0.054969 | -0.324429 |
| 17               | 7                | 0              | -3.715909               | -0.831168 | 0.000533  |
| 18               | 6                | 0              | -4.442283               | -2.025406 | 0.411897  |
| 19               | 1                | 0              | -5.155046               | -2.309784 | -0.364593 |
| 20               | 1                | 0              | -3.737081               | -2.843003 | 0.562084  |
| 21               | 1                | 0              | -4.988340               | -1.853369 | 1.344602  |
| 22               | 8                | 0              | -1.632410               | 2.771394  | -0.647162 |
| 23               | 8                | 0              | 4.031080                | -0.088256 | 0.327607  |
| 24               | 6                | 0              | 4.729275                | -1.163554 | -0.309648 |
| 25               | 1                | 0              | 4.595058                | -1.133992 | -1.395046 |
| 26               | 1                | 0              | 5.781801                | -1.014549 | -0.071569 |
| 27               | 1                | 0              | 4.401701                | -2.132553 | 0.078834  |

### Structure 32e (vacuum)

Energy (Hartrees): -632.334758056

No imaginary frequencies

Standard orientation:

| Center<br>Number | Atomic<br>Number | Atomic<br>Type | Coordinates (Angstroms) |           |           |
|------------------|------------------|----------------|-------------------------|-----------|-----------|
|                  |                  |                | X                       | Y         | Z         |
| 1                | 6                | 0              | -1.990257               | 1.173519  | -0.664625 |
| 2                | 6                | 0              | -0.606639               | 1.198979  | -0.626013 |
| 3                | 6                | 0              | 0.128645                | 0.138541  | -0.064637 |
| 4                | 6                | 0              | -0.594528               | -0.927860 | 0.475881  |
| 5                | 6                | 0              | -1.991302               | -0.971331 | 0.441036  |
| 6                | 6                | 0              | -2.695751               | 0.086034  | -0.133835 |
| 7                | 1                | 0              | -2.551183               | 1.991263  | -1.101380 |
| 8                | 1                | 0              | -0.083431               | 2.054334  | -1.032259 |
| 9                | 1                | 0              | -0.063975               | -1.741290 | 0.960007  |
| 10               | 1                | 0              | -2.505210               | -1.816950 | 0.878399  |
| 11               | 6                | 0              | 1.619073                | 0.140787  | -0.054971 |
| 12               | 6                | 0              | 2.251539                | -1.011672 | -0.458686 |
| 13               | 1                | 0              | 1.607845                | -1.783230 | -0.872035 |
| 14               | 6                | 0              | 2.323891                | 1.359376  | 0.334555  |
| 15               | 1                | 0              | 3.424113                | 1.330986  | 0.252806  |
| 16               | 1                | 0              | 3.726834                | -2.303641 | -0.875180 |
| 17               | 7                | 0              | 3.548075                | -1.419041 | -0.431275 |
| 18               | 6                | 0              | 4.695116                | -0.770141 | 0.177795  |
| 19               | 1                | 0              | 5.501016                | -1.500812 | 0.260084  |
| 20               | 1                | 0              | 5.058703                | 0.077915  | -0.411315 |
| 21               | 1                | 0              | 4.445506                | -0.415709 | 1.181566  |
| 22               | 8                | 0              | 1.792092                | 2.395903  | 0.701007  |
| 23               | 8                | 0              | -4.058267               | 0.158959  | -0.218902 |
| 24               | 6                | 0              | -4.828105               | -0.900574 | 0.328417  |
| 25               | 1                | 0              | -4.612687               | -1.852821 | -0.169519 |
| 26               | 1                | 0              | -4.655188               | -1.006663 | 1.405215  |
| 27               | 1                | 0              | -5.869560               | -0.632930 | 0.156198  |

### Structure 32e (CHCl<sub>3</sub>)

Energy (Hartrees): -632.358014972

No imaginary frequencies

Standard orientation:

| Center<br>Number | Atomic<br>Number | Atomic<br>Type | Coordinates (Angstroms) |           |           |
|------------------|------------------|----------------|-------------------------|-----------|-----------|
|                  |                  |                | X                       | Y         | Z         |
| 1                | 6                | 0              | -1.991942               | 1.162301  | -0.698839 |
| 2                | 6                | 0              | -0.606571               | 1.187890  | -0.659781 |
| 3                | 6                | 0              | 0.130606                | 0.145695  | -0.066711 |
| 4                | 6                | 0              | -0.594694               | -0.907781 | 0.499344  |
| 5                | 6                | 0              | -1.991880               | -0.953021 | 0.464037  |
| 6                | 6                | 0              | -2.697996               | 0.088680  | -0.138737 |
| 7                | 1                | 0              | -2.548374               | 1.968919  | -1.163156 |
| 8                | 1                | 0              | -0.085104               | 2.028087  | -1.101082 |
| 9                | 1                | 0              | -0.065279               | -1.713862 | 0.996867  |
| 10               | 1                | 0              | -2.506413               | -1.788881 | 0.919344  |
| 11               | 6                | 0              | 1.622930                | 0.149360  | -0.056523 |
| 12               | 6                | 0              | 2.255708                | -1.013711 | -0.463434 |
| 13               | 1                | 0              | 1.610027                | -1.781798 | -0.879704 |
| 14               | 6                | 0              | 2.328029                | 1.348921  | 0.340750  |
| 15               | 1                | 0              | 3.423923                | 1.325512  | 0.243579  |
| 16               | 1                | 0              | 3.710402                | -2.320141 | -0.854600 |
| 17               | 7                | 0              | 3.538305                | -1.419515 | -0.434725 |
| 18               | 6                | 0              | 4.693723                | -0.771423 | 0.163625  |
| 19               | 1                | 0              | 5.497460                | -1.505156 | 0.229239  |
| 20               | 1                | 0              | 5.047223                | 0.075154  | -0.432467 |
| 21               | 1                | 0              | 4.457508                | -0.419763 | 1.171751  |
| 22               | 8                | 0              | 1.802544                | 2.388588  | 0.744222  |
| 23               | 8                | 0              | -4.059824               | 0.155140  | -0.226953 |
| 24               | 6                | 0              | -4.831608               | -0.902591 | 0.339876  |
| 25               | 1                | 0              | -4.610739               | -1.861154 | -0.141315 |
| 26               | 1                | 0              | -4.664910               | -0.983856 | 1.418893  |
| 27               | 1                | 0              | -5.873455               | -0.642208 | 0.155929  |

## Structure 32e (DMSO)

Energy (Hartrees): -632.359726987

No imaginary frequencies

Standard orientation:

| Center<br>Number | Atomic<br>Number | Atomic<br>Type | Coordinates (Angstroms) |           |           |
|------------------|------------------|----------------|-------------------------|-----------|-----------|
|                  |                  |                | X                       | Y         | Z         |
| 1                | 6                | 0              | -1.990869               | 1.140920  | -0.744321 |
| 2                | 6                | 0              | -0.604579               | 1.166350  | -0.703280 |
| 3                | 6                | 0              | 0.131875                | 0.142354  | -0.078563 |
| 4                | 6                | 0              | -0.595296               | -0.897555 | 0.510618  |
| 5                | 6                | 0              | -1.992915               | -0.942482 | 0.475738  |
| 6                | 6                | 0              | -2.699477               | 0.084012  | -0.153971 |
| 7                | 1                | 0              | -2.543843               | 1.933706  | -1.236330 |
| 8                | 1                | 0              | -0.082062               | 1.990735  | -1.173377 |
| 9                | 1                | 0              | -0.067086               | -1.695172 | 1.022894  |
| 10               | 1                | 0              | -2.507194               | -1.768126 | 0.949540  |
| 11               | 6                | 0              | 1.624488                | 0.152145  | -0.058625 |
| 12               | 6                | 0              | 2.262851                | -1.010728 | -0.469021 |
| 13               | 1                | 0              | 1.621235                | -1.779899 | -0.889526 |
| 14               | 6                | 0              | 2.319349                | 1.345792  | 0.362572  |
| 15               | 1                | 0              | 3.415106                | 1.329154  | 0.269321  |
| 16               | 1                | 0              | 3.716447                | -2.314839 | -0.851056 |
| 17               | 7                | 0              | 3.542335                | -1.409863 | -0.438847 |
| 18               | 6                | 0              | 4.696180                | -0.758278 | 0.159379  |
| 19               | 1                | 0              | 5.503850                | -1.488104 | 0.213196  |
| 20               | 1                | 0              | 5.038526                | 0.095447  | -0.432661 |
| 21               | 1                | 0              | 4.462078                | -0.415541 | 1.171221  |
| 22               | 8                | 0              | 1.787857                | 2.376738  | 0.788917  |
| 23               | 8                | 0              | -4.059514               | 0.147136  | -0.243058 |
| 24               | 6                | 0              | -4.826926               | -0.887065 | 0.378221  |
| 25               | 1                | 0              | -4.603529               | -1.866867 | -0.055374 |
| 26               | 1                | 0              | -4.654288               | -0.915040 | 1.458684  |
| 27               | 1                | 0              | -5.870418               | -0.640188 | 0.186057  |



## Structure 32e (C<sub>2</sub>H<sub>5</sub>OH)

Energy (Hartrees): -632.363914761

No imaginary frequencies

Standard orientation:

| Center<br>Number | Atomic<br>Number | Atomic<br>Type | Coordinates (Angstroms) |           |           |
|------------------|------------------|----------------|-------------------------|-----------|-----------|
|                  |                  |                | X                       | Y         | Z         |
| 1                | 6                | 0              | -1.985736               | 1.116021  | -0.786961 |
| 2                | 6                | 0              | -0.599397               | 1.142841  | -0.741366 |
| 3                | 6                | 0              | 0.132215                | 0.141785  | -0.076753 |
| 4                | 6                | 0              | -0.595205               | -0.878551 | 0.544709  |
| 5                | 6                | 0              | -1.992121               | -0.925214 | 0.504756  |
| 6                | 6                | 0              | -2.693105               | 0.079213  | -0.163584 |
| 7                | 1                | 0              | -2.537949               | 1.891130  | -1.307390 |
| 8                | 1                | 0              | -0.074566               | 1.948684  | -1.241551 |
| 9                | 1                | 0              | -0.067829               | -1.657742 | 1.085564  |
| 10               | 1                | 0              | -2.509628               | -1.734535 | 1.002456  |
| 11               | 6                | 0              | 1.626035                | 0.153087  | -0.047728 |
| 12               | 6                | 0              | 2.266652                | -1.008965 | -0.467315 |
| 13               | 1                | 0              | 1.623220                | -1.773832 | -0.892554 |
| 14               | 6                | 0              | 2.313750                | 1.333721  | 0.389158  |
| 15               | 1                | 0              | 3.408974                | 1.323532  | 0.324380  |
| 16               | 1                | 0              | 3.716764                | -2.310366 | -0.857968 |
| 17               | 7                | 0              | 3.543360                | -1.405759 | -0.443757 |
| 18               | 6                | 0              | 4.702293                | -0.744419 | 0.135826  |
| 19               | 1                | 0              | 5.520646                | -1.463488 | 0.161289  |
| 20               | 1                | 0              | 5.017564                | 0.119724  | -0.455834 |
| 21               | 1                | 0              | 4.488265                | -0.418467 | 1.157427  |
| 22               | 8                | 0              | 1.769875                | 2.370088  | 0.813281  |
| 23               | 8                | 0              | -4.057968               | 0.137811  | -0.262862 |
| 24               | 6                | 0              | -4.832182               | -0.874136 | 0.389999  |
| 25               | 1                | 0              | -4.609640               | -1.866267 | -0.014021 |
| 26               | 1                | 0              | -4.660323               | -0.866305 | 1.470439  |
| 27               | 1                | 0              | -5.873466               | -0.627246 | 0.186261  |

### Structure 32f (vacuum)

Energy (Hartrees): -632.337409049

No imaginary frequencies

Standard orientation:

| Center<br>Number | Atomic<br>Number | Atomic<br>Type | Coordinates (Angstroms) |           |           |
|------------------|------------------|----------------|-------------------------|-----------|-----------|
|                  |                  |                | X                       | Y         | Z         |
| 1                | 6                | 0              | -2.076347               | 1.337995  | -0.407203 |
| 2                | 6                | 0              | -0.690845               | 1.325436  | -0.403493 |
| 3                | 6                | 0              | 0.037085                | 0.175942  | -0.038407 |
| 4                | 6                | 0              | -0.702594               | -0.955142 | 0.324916  |
| 5                | 6                | 0              | -2.099223               | -0.965873 | 0.308636  |
| 6                | 6                | 0              | -2.794112               | 0.188562  | -0.055154 |
| 7                | 1                | 0              | -2.626913               | 2.225733  | -0.695084 |
| 8                | 1                | 0              | -0.159901               | 2.218643  | -0.713513 |
| 9                | 1                | 0              | -0.181061               | -1.847776 | 0.653469  |
| 10               | 1                | 0              | -2.623525               | -1.866318 | 0.599924  |
| 11               | 6                | 0              | 1.524234                | 0.170091  | -0.044034 |
| 12               | 6                | 0              | 2.160961                | -0.909496 | -0.617644 |
| 13               | 1                | 0              | 1.541335                | -1.587494 | -1.200410 |
| 14               | 6                | 0              | 2.196031                | 1.360651  | 0.464633  |
| 15               | 1                | 0              | 1.538279                | 2.021476  | 1.064192  |
| 16               | 1                | 0              | 3.673368                | -2.114394 | -1.121272 |
| 17               | 7                | 0              | 3.449077                | -1.310021 | -0.559498 |
| 18               | 6                | 0              | 4.458860                | -0.908006 | 0.410949  |
| 19               | 1                | 0              | 5.288500                | -1.612913 | 0.347606  |
| 20               | 1                | 0              | 4.805937                | 0.109143  | 0.229481  |
| 21               | 1                | 0              | 4.039238                | -0.943679 | 1.421465  |
| 22               | 8                | 0              | 3.352240                | 1.705341  | 0.249182  |
| 23               | 8                | 0              | -4.155350               | 0.298343  | -0.095619 |
| 24               | 6                | 0              | -4.937415               | -0.837559 | 0.243517  |
| 25               | 1                | 0              | -4.739161               | -1.676970 | -0.432324 |
| 26               | 1                | 0              | -4.758886               | -1.153070 | 1.277497  |
| 27               | 1                | 0              | -5.975672               | -0.527320 | 0.136661  |

## Structure 32f (CHCl<sub>3</sub>)

Energy (Hartrees): -632.357393150

No imaginary frequencies

Standard orientation:

| Center<br>Number | Atomic<br>Number | Atomic<br>Type | Coordinates (Angstroms) |           |           |
|------------------|------------------|----------------|-------------------------|-----------|-----------|
|                  |                  |                | X                       | Y         | Z         |
| 1                | 6                | 0              | -2.077571               | 1.353534  | -0.367137 |
| 2                | 6                | 0              | -0.690711               | 1.342695  | -0.375026 |
| 3                | 6                | 0              | 0.042034                | 0.181962  | -0.054561 |
| 4                | 6                | 0              | -0.696072               | -0.964227 | 0.269749  |
| 5                | 6                | 0              | -2.092906               | -0.976067 | 0.263635  |
| 6                | 6                | 0              | -2.792614               | 0.191233  | -0.050562 |
| 7                | 1                | 0              | -2.626885               | 2.253915  | -0.618606 |
| 8                | 1                | 0              | -0.164701               | 2.248581  | -0.656179 |
| 9                | 1                | 0              | -0.173556               | -1.870858 | 0.555984  |
| 10               | 1                | 0              | -2.614307               | -1.888021 | 0.523056  |
| 11               | 6                | 0              | 1.529736                | 0.177633  | -0.062220 |
| 12               | 6                | 0              | 2.172249                | -0.907213 | -0.638521 |
| 13               | 1                | 0              | 1.570666                | -1.571507 | -1.254238 |
| 14               | 6                | 0              | 2.199251                | 1.360028  | 0.439409  |
| 15               | 1                | 0              | 1.552738                | 2.019834  | 1.049815  |
| 16               | 1                | 0              | 3.690203                | -2.118093 | -1.095943 |
| 17               | 7                | 0              | 3.444704                | -1.318115 | -0.531845 |
| 18               | 6                | 0              | 4.422433                | -0.924822 | 0.471386  |
| 19               | 1                | 0              | 5.203393                | -1.685117 | 0.495123  |
| 20               | 1                | 0              | 4.856331                | 0.052761  | 0.257180  |
| 21               | 1                | 0              | 3.945155                | -0.872054 | 1.454481  |
| 22               | 8                | 0              | 3.357759                | 1.716435  | 0.208762  |
| 23               | 8                | 0              | -4.153955               | 0.299306  | -0.073913 |
| 24               | 6                | 0              | -4.935211               | -0.848320 | 0.256803  |
| 25               | 1                | 0              | -4.758589               | -1.669229 | -0.445958 |
| 26               | 1                | 0              | -4.732757               | -1.187166 | 1.277921  |
| 27               | 1                | 0              | -5.974764               | -0.530788 | 0.183762  |

## Structure 32f (DMSO)

Energy (Hartrees): -632.357452572

No imaginary frequencies

Standard orientation:

| Center<br>Number | Atomic<br>Number | Atomic<br>Type | Coordinates (Angstroms) |           |           |
|------------------|------------------|----------------|-------------------------|-----------|-----------|
|                  |                  |                | X                       | Y         | Z         |
| 1                | 6                | 0              | -2.076855               | 1.364421  | -0.340129 |
| 2                | 6                | 0              | -0.689121               | 1.353648  | -0.348855 |
| 3                | 6                | 0              | 0.044484                | 0.188495  | -0.045460 |
| 4                | 6                | 0              | -0.695019               | -0.961771 | 0.264590  |
| 5                | 6                | 0              | -2.091885               | -0.973600 | 0.257750  |
| 6                | 6                | 0              | -2.793353               | 0.197438  | -0.041925 |
| 7                | 1                | 0              | -2.622549               | 2.270266  | -0.580684 |
| 8                | 1                | 0              | -0.165308               | 2.264403  | -0.618594 |
| 9                | 1                | 0              | -0.174183               | -1.874095 | 0.535331  |
| 10               | 1                | 0              | -2.612213               | -1.889758 | 0.504229  |
| 11               | 6                | 0              | 1.532103                | 0.180631  | -0.061504 |
| 12               | 6                | 0              | 2.164494                | -0.922192 | -0.621673 |
| 13               | 1                | 0              | 1.555047                | -1.595436 | -1.219226 |
| 14               | 6                | 0              | 2.205252                | 1.368450  | 0.416962  |
| 15               | 1                | 0              | 1.563545                | 2.032366  | 1.028356  |
| 16               | 1                | 0              | 3.660731                | -2.165070 | -1.050873 |
| 17               | 7                | 0              | 3.431165                | -1.340390 | -0.514454 |
| 18               | 6                | 0              | 4.420347                | -0.929594 | 0.469463  |
| 19               | 1                | 0              | 5.207133                | -1.683507 | 0.487269  |
| 20               | 1                | 0              | 4.841488                | 0.049403  | 0.236940  |
| 21               | 1                | 0              | 3.958291                | -0.869675 | 1.459800  |
| 22               | 8                | 0              | 3.360056                | 1.730702  | 0.170112  |
| 23               | 8                | 0              | -4.153244               | 0.301498  | -0.068580 |
| 24               | 6                | 0              | -4.928305               | -0.861651 | 0.232110  |
| 25               | 1                | 0              | -4.730167               | -1.669326 | -0.479410 |
| 26               | 1                | 0              | -4.737186               | -1.215147 | 1.250130  |
| 27               | 1                | 0              | -5.970131               | -0.554938 | 0.147677  |

## Structure 32f (C<sub>2</sub>H<sub>5</sub>OH)

Energy (Hartrees): -632.361084755

No imaginary frequencies

Standard orientation:

| Center<br>Number | Atomic<br>Number | Atomic<br>Type | Coordinates (Angstroms) |           |           |
|------------------|------------------|----------------|-------------------------|-----------|-----------|
|                  |                  |                | X                       | Y         | Z         |
| 1                | 6                | 0              | -2.081131               | 1.362591  | -0.353821 |
| 2                | 6                | 0              | -0.693385               | 1.358942  | -0.366932 |
| 3                | 6                | 0              | 0.044774                | 0.197530  | -0.063154 |
| 4                | 6                | 0              | -0.686218               | -0.958050 | 0.245823  |
| 5                | 6                | 0              | -2.082863               | -0.976590 | 0.244889  |
| 6                | 6                | 0              | -2.787710               | 0.192334  | -0.049667 |
| 7                | 1                | 0              | -2.633965               | 2.264704  | -0.592669 |
| 8                | 1                | 0              | -0.173613               | 2.271554  | -0.638111 |
| 9                | 1                | 0              | -0.158877               | -1.867706 | 0.513395  |
| 10               | 1                | 0              | -2.599044               | -1.894822 | 0.492287  |
| 11               | 6                | 0              | 1.532711                | 0.195753  | -0.071865 |
| 12               | 6                | 0              | 2.172527                | -0.892365 | -0.660351 |
| 13               | 1                | 0              | 1.576763                | -1.533747 | -1.304977 |
| 14               | 6                | 0              | 2.201273                | 1.365823  | 0.429249  |
| 15               | 1                | 0              | 1.557983                | 2.038208  | 1.025207  |
| 16               | 1                | 0              | 3.676735                | -2.119837 | -1.100184 |
| 17               | 7                | 0              | 3.429308                | -1.323274 | -0.529352 |
| 18               | 6                | 0              | 4.390317                | -0.960397 | 0.501684  |
| 19               | 1                | 0              | 5.113778                | -1.771612 | 0.583941  |
| 20               | 1                | 0              | 4.908308                | -0.028087 | 0.271943  |
| 21               | 1                | 0              | 3.877300                | -0.838312 | 1.459137  |
| 22               | 8                | 0              | 3.374298                | 1.715921  | 0.211674  |
| 23               | 8                | 0              | -4.153702               | 0.291975  | -0.065559 |
| 24               | 6                | 0              | -4.925773               | -0.865902 | 0.271410  |
| 25               | 1                | 0              | -4.749500               | -1.680933 | -0.436918 |
| 26               | 1                | 0              | -4.705239               | -1.203939 | 1.288220  |
| 27               | 1                | 0              | -5.967679               | -0.553732 | 0.211687  |

## Structure 32g (vacuum)

Energy (Hartrees): -632.341942983

No imaginary frequencies

Standard orientation:

| Center<br>Number | Atomic<br>Number | Atomic<br>Type | Coordinates (Angstroms) |           |           |
|------------------|------------------|----------------|-------------------------|-----------|-----------|
|                  |                  |                | X                       | Y         | Z         |
| 1                | 6                | 0              | 2.071978                | -0.897109 | -0.470031 |
| 2                | 6                | 0              | 0.681993                | -0.791039 | -0.544085 |
| 3                | 6                | 0              | -0.005776               | 0.306004  | -0.014440 |
| 4                | 6                | 0              | 0.762051                | 1.308386  | 0.605109  |
| 5                | 6                | 0              | 2.144198                | 1.226303  | 0.672820  |
| 6                | 6                | 0              | 2.812227                | 0.119653  | 0.136602  |
| 7                | 1                | 0              | 2.558152                | -1.762936 | -0.899350 |
| 8                | 1                | 0              | 0.130633                | -1.577014 | -1.049241 |
| 9                | 1                | 0              | 0.262749                | 2.157189  | 1.059219  |
| 10               | 1                | 0              | 2.727785                | 2.001831  | 1.154499  |
| 11               | 6                | 0              | -1.482803               | 0.408098  | -0.105542 |
| 12               | 6                | 0              | -2.087774               | 1.580385  | -0.464878 |
| 13               | 1                | 0              | -1.509740               | 2.464208  | -0.717832 |
| 14               | 6                | 0              | -2.310025               | -0.746691 | 0.196136  |
| 15               | 1                | 0              | -1.794543               | -1.662087 | 0.513839  |
| 16               | 7                | 0              | -3.594789               | -0.715898 | 0.121889  |
| 17               | 6                | 0              | -4.357245               | -1.900902 | 0.463729  |
| 18               | 1                | 0              | -5.041830               | -1.674683 | 1.286941  |
| 19               | 1                | 0              | -4.969486               | -2.204747 | -0.390909 |
| 20               | 1                | 0              | -3.718551               | -2.744749 | 0.758692  |
| 21               | 8                | 0              | -3.397705               | 1.758652  | -0.556044 |
| 22               | 1                | 0              | -3.822999               | 0.872943  | -0.322756 |
| 23               | 8                | 0              | 4.172739                | 0.124643  | 0.259900  |
| 24               | 6                | 0              | 4.904924                | -0.975632 | -0.260801 |
| 25               | 1                | 0              | 4.621601                | -1.913523 | 0.229575  |
| 26               | 1                | 0              | 4.765020                | -1.073714 | -1.342940 |
| 27               | 1                | 0              | 5.951972                | -0.762520 | -0.051505 |

## Structure 32g (CHCl<sub>3</sub>)

Energy (Hartrees): -632.356845918

No imaginary frequencies

Standard orientation:

| Center<br>Number | Atomic<br>Number | Atomic<br>Type | Coordinates (Angstroms) |           |           |
|------------------|------------------|----------------|-------------------------|-----------|-----------|
|                  |                  |                | X                       | Y         | Z         |
| 1                | 6                | 0              | 2.072694                | -0.911622 | -0.440179 |
| 2                | 6                | 0              | 0.681929                | -0.808563 | -0.509776 |
| 3                | 6                | 0              | -0.004291               | 0.307102  | -0.014030 |
| 4                | 6                | 0              | 0.766083                | 1.328936  | 0.571171  |
| 5                | 6                | 0              | 2.149667                | 1.248926  | 0.633636  |
| 6                | 6                | 0              | 2.816164                | 0.126081  | 0.127460  |
| 7                | 1                | 0              | 2.558412                | -1.791561 | -0.841061 |
| 8                | 1                | 0              | 0.129441                | -1.614337 | -0.981472 |
| 9                | 1                | 0              | 0.271384                | 2.194002  | 0.999309  |
| 10               | 1                | 0              | 2.731125                | 2.042706  | 1.089042  |
| 11               | 6                | 0              | -1.482455               | 0.408266  | -0.104584 |
| 12               | 6                | 0              | -2.088890               | 1.583856  | -0.446905 |
| 13               | 1                | 0              | -1.520085               | 2.475515  | -0.692798 |
| 14               | 6                | 0              | -2.309362               | -0.752722 | 0.186827  |
| 15               | 1                | 0              | -1.799098               | -1.673064 | 0.491928  |
| 16               | 7                | 0              | -3.594493               | -0.713510 | 0.116376  |
| 17               | 6                | 0              | -4.366740               | -1.897813 | 0.444721  |
| 18               | 1                | 0              | -5.041256               | -1.677372 | 1.278202  |
| 19               | 1                | 0              | -4.990893               | -2.177804 | -0.409667 |
| 20               | 1                | 0              | -3.734446               | -2.752463 | 0.717595  |
| 21               | 8                | 0              | -3.405865               | 1.751809  | -0.529161 |
| 22               | 1                | 0              | -3.819417               | 0.851866  | -0.300914 |
| 23               | 8                | 0              | 4.176905                | 0.135302  | 0.237024  |
| 24               | 6                | 0              | 4.908427                | -0.993375 | -0.241356 |
| 25               | 1                | 0              | 4.633960                | -1.904671 | 0.300055  |
| 26               | 1                | 0              | 4.756927                | -1.141935 | -1.315386 |
| 27               | 1                | 0              | 5.957705                | -0.767659 | -0.054277 |

## Structure 32g (DMSO)

Energy (Hartrees): -632.355061608

No imaginary frequencies

Standard orientation:

| Center<br>Number | Atomic<br>Number | Atomic<br>Type | Coordinates (Angstroms) |           |           |
|------------------|------------------|----------------|-------------------------|-----------|-----------|
|                  |                  |                | X                       | Y         | Z         |
| 1                | 6                | 0              | 2.068839                | -0.920051 | -0.416610 |
| 2                | 6                | 0              | 0.677648                | -0.816454 | -0.479753 |
| 3                | 6                | 0              | -0.004154               | 0.314780  | -0.012386 |
| 4                | 6                | 0              | 0.772367                | 1.352849  | 0.535818  |
| 5                | 6                | 0              | 2.156576                | 1.271445  | 0.591794  |
| 6                | 6                | 0              | 2.819273                | 0.132149  | 0.115945  |
| 7                | 1                | 0              | 2.548930                | -1.813636 | -0.793433 |
| 8                | 1                | 0              | 0.121962                | -1.637102 | -0.920662 |
| 9                | 1                | 0              | 0.283964                | 2.233118  | 0.939417  |
| 10               | 1                | 0              | 2.739605                | 2.078909  | 1.020737  |
| 11               | 6                | 0              | -1.482593               | 0.413239  | -0.095599 |
| 12               | 6                | 0              | -2.094917               | 1.590685  | -0.422565 |
| 13               | 1                | 0              | -1.531059               | 2.488888  | -0.656108 |
| 14               | 6                | 0              | -2.304749               | -0.755611 | 0.180794  |
| 15               | 1                | 0              | -1.793907               | -1.679641 | 0.470580  |
| 16               | 7                | 0              | -3.590413               | -0.717326 | 0.111157  |
| 17               | 6                | 0              | -4.359365               | -1.909661 | 0.422464  |
| 18               | 1                | 0              | -5.037251               | -1.702020 | 1.256489  |
| 19               | 1                | 0              | -4.979694               | -2.181418 | -0.437452 |
| 20               | 1                | 0              | -3.722679               | -2.763295 | 0.685864  |
| 21               | 8                | 0              | -3.413298               | 1.749789  | -0.501770 |
| 22               | 1                | 0              | -3.815772               | 0.839379  | -0.284115 |
| 23               | 8                | 0              | 4.178747                | 0.139308  | 0.218099  |
| 24               | 6                | 0              | 4.898924                | -1.015842 | -0.221414 |
| 25               | 1                | 0              | 4.614055                | -1.903724 | 0.351724  |
| 26               | 1                | 0              | 4.743151                | -1.200649 | -1.288740 |
| 27               | 1                | 0              | 5.950894                | -0.795475 | -0.043957 |



## Structure 32g (C<sub>2</sub>H<sub>5</sub>OH)

Energy (Hartrees): -632.356713333

No imaginary frequencies

Standard orientation:

| Center<br>Number | Atomic<br>Number | Atomic<br>Type | Coordinates (Angstroms) |           |           |
|------------------|------------------|----------------|-------------------------|-----------|-----------|
|                  |                  |                | X                       | Y         | Z         |
| 1                | 6                | 0              | 2.067219                | -0.915055 | -0.428484 |
| 2                | 6                | 0              | 0.676245                | -0.810651 | -0.492739 |
| 3                | 6                | 0              | -0.005269               | 0.315688  | -0.013366 |
| 4                | 6                | 0              | 0.768980                | 1.347503  | 0.548566  |
| 5                | 6                | 0              | 2.153168                | 1.265280  | 0.606123  |
| 6                | 6                | 0              | 2.813720                | 0.131355  | 0.117881  |
| 7                | 1                | 0              | 2.549303                | -1.803551 | -0.814677 |
| 8                | 1                | 0              | 0.120746                | -1.625566 | -0.944580 |
| 9                | 1                | 0              | 0.279301                | 2.222473  | 0.962079  |
| 10               | 1                | 0              | 2.736647                | 2.067049  | 1.045486  |
| 11               | 6                | 0              | -1.483888               | 0.415521  | -0.098108 |
| 12               | 6                | 0              | -2.091066               | 1.591389  | -0.429960 |
| 13               | 1                | 0              | -1.529744               | 2.489113  | -0.669151 |
| 14               | 6                | 0              | -2.305635               | -0.753779 | 0.183544  |
| 15               | 1                | 0              | -1.791135               | -1.673949 | 0.479057  |
| 16               | 7                | 0              | -3.590671               | -0.720008 | 0.112765  |
| 17               | 6                | 0              | -4.351824               | -1.916376 | 0.430227  |
| 18               | 1                | 0              | -5.028135               | -1.710187 | 1.265842  |
| 19               | 1                | 0              | -4.974065               | -2.193264 | -0.426551 |
| 20               | 1                | 0              | -3.710515               | -2.766394 | 0.693603  |
| 21               | 8                | 0              | -3.415771               | 1.752594  | -0.509009 |
| 22               | 1                | 0              | -3.824710               | 0.846633  | -0.287861 |
| 23               | 8                | 0              | 4.178838                | 0.137409  | 0.223064  |
| 24               | 6                | 0              | 4.904608                | -1.012926 | -0.225268 |
| 25               | 1                | 0              | 4.617633                | -1.905175 | 0.339227  |
| 26               | 1                | 0              | 4.752676                | -1.184914 | -1.294922 |
| 27               | 1                | 0              | 5.954617                | -0.789928 | -0.039834 |

### Structure 32h (vacuum)

Energy (Hartrees): -632.317223084

No imaginary frequencies

Standard orientation:

| Center<br>Number | Atomic<br>Number | Atomic<br>Type | Coordinates (Angstroms) |           |           |
|------------------|------------------|----------------|-------------------------|-----------|-----------|
|                  |                  |                | X                       | Y         | Z         |
| 1                | 6                | 0              | 1.836062                | -1.220466 | -0.748686 |
| 2                | 6                | 0              | 0.476027                | -0.956281 | -0.724492 |
| 3                | 6                | 0              | -0.041675               | 0.181597  | -0.078799 |
| 4                | 6                | 0              | 0.871754                | 1.030482  | 0.552953  |
| 5                | 6                | 0              | 2.246652                | 0.784999  | 0.529499  |
| 6                | 6                | 0              | 2.735155                | -0.347318 | -0.124197 |
| 7                | 1                | 0              | 2.228047                | -2.094892 | -1.254388 |
| 8                | 1                | 0              | -0.199964               | -1.634504 | -1.233753 |
| 9                | 1                | 0              | 0.506380                | 1.893319  | 1.099054  |
| 10               | 1                | 0              | 2.913434                | 1.469126  | 1.037217  |
| 11               | 6                | 0              | -1.505543               | 0.453493  | -0.075588 |
| 12               | 6                | 0              | -1.925301               | 1.701931  | -0.372449 |
| 13               | 1                | 0              | -1.198327               | 2.461060  | -0.648176 |
| 14               | 6                | 0              | -2.393408               | -0.667299 | 0.274724  |
| 15               | 1                | 0              | -1.874816               | -1.524162 | 0.735539  |
| 16               | 7                | 0              | -3.651560               | -0.695075 | 0.088422  |
| 17               | 6                | 0              | -4.367691               | -1.875057 | 0.526765  |
| 18               | 1                | 0              | -4.908531               | -2.305901 | -0.322013 |
| 19               | 1                | 0              | -3.720148               | -2.649792 | 0.968060  |
| 20               | 1                | 0              | -5.122250               | -1.584932 | 1.265209  |
| 21               | 8                | 0              | -3.217997               | 2.104228  | -0.349578 |
| 22               | 1                | 0              | -3.266010               | 3.031069  | -0.601780 |
| 23               | 8                | 0              | 4.054568                | -0.692267 | -0.202699 |
| 24               | 6                | 0              | 5.014122                | 0.153278  | 0.415335  |
| 25               | 1                | 0              | 4.850929                | 0.220707  | 1.496635  |
| 26               | 1                | 0              | 5.982661                | -0.306727 | 0.225758  |
| 27               | 1                | 0              | 5.000022                | 1.159321  | -0.018476 |

### Structure 32h (CHCl<sub>3</sub>)

Energy (Hartrees): -632.337988449

No imaginary frequencies

Standard orientation:

| Center<br>Number | Atomic<br>Number | Atomic<br>Type | Coordinates (Angstroms) |           |           |
|------------------|------------------|----------------|-------------------------|-----------|-----------|
|                  |                  |                | X                       | Y         | Z         |
| 1                | 6                | 0              | 1.819394                | -1.267477 | -0.672115 |
| 2                | 6                | 0              | 0.460026                | -0.992189 | -0.653673 |
| 3                | 6                | 0              | -0.045587               | 0.183770  | -0.068302 |
| 4                | 6                | 0              | 0.880833                | 1.061075  | 0.507555  |
| 5                | 6                | 0              | 2.253681                | 0.805726  | 0.485963  |
| 6                | 6                | 0              | 2.730321                | -0.366765 | -0.105352 |
| 7                | 1                | 0              | 2.196642                | -2.174197 | -1.131448 |
| 8                | 1                | 0              | -0.221337               | -1.695391 | -1.120281 |
| 9                | 1                | 0              | 0.530320                | 1.958677  | 1.005340  |
| 10               | 1                | 0              | 2.929326                | 1.513443  | 0.947792  |
| 11               | 6                | 0              | -1.508767               | 0.465713  | -0.068685 |
| 12               | 6                | 0              | -1.919453               | 1.722452  | -0.352518 |
| 13               | 1                | 0              | -1.193880               | 2.484706  | -0.620035 |
| 14               | 6                | 0              | -2.399985               | -0.653910 | 0.275445  |
| 15               | 1                | 0              | -1.893705               | -1.494533 | 0.773258  |
| 16               | 7                | 0              | -3.652436               | -0.708195 | 0.042422  |
| 17               | 6                | 0              | -4.362546               | -1.893928 | 0.485288  |
| 18               | 1                | 0              | -4.870831               | -2.353092 | -0.369197 |
| 19               | 1                | 0              | -3.714335               | -2.645990 | 0.959786  |
| 20               | 1                | 0              | -5.143767               | -1.604602 | 1.196451  |
| 21               | 8                | 0              | -3.206635               | 2.135225  | -0.320585 |
| 22               | 1                | 0              | -3.242143               | 3.073086  | -0.548251 |
| 23               | 8                | 0              | 4.046185                | -0.723918 | -0.170896 |
| 24               | 6                | 0              | 5.024909                | 0.175007  | 0.351022  |
| 25               | 1                | 0              | 4.883826                | 0.340930  | 1.423801  |
| 26               | 1                | 0              | 5.988103                | -0.306892 | 0.186790  |
| 27               | 1                | 0              | 5.005461                | 1.133913  | -0.176879 |

## Structure 32h (DMSO)

Energy (Hartrees): -632.336251463

No imaginary frequencies

Standard orientation:

| Center<br>Number | Atomic<br>Number | Atomic<br>Type | Coordinates (Angstroms) |           |           |
|------------------|------------------|----------------|-------------------------|-----------|-----------|
|                  |                  |                | X                       | Y         | Z         |
| 1                | 6                | 0              | 1.814455                | -1.286721 | -0.644751 |
| 2                | 6                | 0              | 0.454782                | -1.009118 | -0.627526 |
| 3                | 6                | 0              | -0.046661               | 0.182398  | -0.070730 |
| 4                | 6                | 0              | 0.884211                | 1.073841  | 0.477307  |
| 5                | 6                | 0              | 2.256250                | 0.815717  | 0.456923  |
| 6                | 6                | 0              | 2.730249                | -0.373140 | -0.105483 |
| 7                | 1                | 0              | 2.184237                | -2.207170 | -1.082699 |
| 8                | 1                | 0              | -0.228185               | -1.725706 | -1.070959 |
| 9                | 1                | 0              | 0.538808                | 1.987399  | 0.948948  |
| 10               | 1                | 0              | 2.934055                | 1.535619  | 0.896020  |
| 11               | 6                | 0              | -1.509420               | 0.467613  | -0.071215 |
| 12               | 6                | 0              | -1.914942               | 1.729556  | -0.342379 |
| 13               | 1                | 0              | -1.186659               | 2.492516  | -0.599090 |
| 14               | 6                | 0              | -2.401883               | -0.651192 | 0.271154  |
| 15               | 1                | 0              | -1.901012               | -1.486631 | 0.781252  |
| 16               | 7                | 0              | -3.652578               | -0.712579 | 0.025200  |
| 17               | 6                | 0              | -4.361168               | -1.898523 | 0.476003  |
| 18               | 1                | 0              | -4.859976               | -2.370876 | -0.377073 |
| 19               | 1                | 0              | -3.711788               | -2.640063 | 0.963746  |
| 20               | 1                | 0              | -5.149708               | -1.606142 | 1.178135  |
| 21               | 8                | 0              | -3.199722               | 2.148751  | -0.303420 |
| 22               | 1                | 0              | -3.222396               | 3.094238  | -0.503511 |
| 23               | 8                | 0              | 4.044241                | -0.730200 | -0.166273 |
| 24               | 6                | 0              | 5.020243                | 0.179301  | 0.350400  |
| 25               | 1                | 0              | 4.870451                | 0.359792  | 1.419234  |
| 26               | 1                | 0              | 5.985416                | -0.302499 | 0.198887  |
| 27               | 1                | 0              | 5.001950                | 1.130767  | -0.189972 |

## Structure 32h (C<sub>2</sub>H<sub>5</sub>OH)

Energy (Hartrees): -632.343172379

No imaginary frequencies

Standard orientation:

| Center<br>Number | Atomic<br>Number | Atomic<br>Type | Coordinates (Angstroms) |           |           |
|------------------|------------------|----------------|-------------------------|-----------|-----------|
|                  |                  |                | X                       | Y         | Z         |
| 1                | 6                | 0              | 1.820114                | -1.267635 | -0.679254 |
| 2                | 6                | 0              | 0.459752                | -0.993247 | -0.662069 |
| 3                | 6                | 0              | -0.046409               | 0.178688  | -0.069778 |
| 4                | 6                | 0              | 0.877928                | 1.053324  | 0.514400  |
| 5                | 6                | 0              | 2.250932                | 0.798615  | 0.494667  |
| 6                | 6                | 0              | 2.727790                | -0.369445 | -0.104390 |
| 7                | 1                | 0              | 2.196991                | -2.171514 | -1.145304 |
| 8                | 1                | 0              | -0.219288               | -1.694891 | -1.134649 |
| 9                | 1                | 0              | 0.526593                | 1.950032  | 1.013393  |
| 10               | 1                | 0              | 2.925463                | 1.504505  | 0.960864  |
| 11               | 6                | 0              | -1.509801               | 0.463541  | -0.073172 |
| 12               | 6                | 0              | -1.912459               | 1.725310  | -0.350776 |
| 13               | 1                | 0              | -1.186262               | 2.491435  | -0.602188 |
| 14               | 6                | 0              | -2.401569               | -0.656833 | 0.260452  |
| 15               | 1                | 0              | -1.891813               | -1.515370 | 0.719556  |
| 16               | 7                | 0              | -3.662856               | -0.696803 | 0.063078  |
| 17               | 6                | 0              | -4.362630               | -1.896760 | 0.491863  |
| 18               | 1                | 0              | -4.890404               | -2.335238 | -0.361560 |
| 19               | 1                | 0              | -3.701439               | -2.658022 | 0.929644  |
| 20               | 1                | 0              | -5.126742               | -1.629198 | 1.229468  |
| 21               | 8                | 0              | -3.199825               | 2.143216  | -0.332749 |
| 22               | 1                | 0              | -3.226848               | 3.089016  | -0.530493 |
| 23               | 8                | 0              | 4.048474                | -0.724086 | -0.169972 |
| 24               | 6                | 0              | 5.025702                | 0.182056  | 0.354619  |
| 25               | 1                | 0              | 4.881032                | 0.343443  | 1.426810  |
| 26               | 1                | 0              | 5.990667                | -0.295324 | 0.188274  |
| 27               | 1                | 0              | 4.996748                | 1.140025  | -0.172963 |

## Structure 32i (vacuum)

Energy (Hartrees): -632.323211947

No imaginary frequencies

Standard orientation:

| Center<br>Number | Atomic<br>Number | Atomic<br>Type | Coordinates (Angstroms) |           |           |
|------------------|------------------|----------------|-------------------------|-----------|-----------|
|                  |                  |                | X                       | Y         | Z         |
| 1                | 6                | 0              | 1.855249                | -1.007992 | -0.426390 |
| 2                | 6                | 0              | 0.469404                | -0.846413 | -0.468557 |
| 3                | 6                | 0              | -0.159944               | 0.297511  | 0.034860  |
| 4                | 6                | 0              | 0.663340                | 1.293490  | 0.592681  |
| 5                | 6                | 0              | 2.039504                | 1.147182  | 0.642855  |
| 6                | 6                | 0              | 2.649139                | -0.005636 | 0.132927  |
| 7                | 1                | 0              | 2.294014                | -1.907874 | -0.836101 |
| 8                | 1                | 0              | -0.126241               | -1.630184 | -0.923750 |
| 9                | 1                | 0              | 0.214822                | 2.192601  | 0.994060  |
| 10               | 1                | 0              | 2.666901                | 1.915827  | 1.078356  |
| 11               | 6                | 0              | -1.635754               | 0.424530  | -0.016042 |
| 12               | 6                | 0              | -2.299995               | 1.571245  | -0.258539 |
| 13               | 1                | 0              | -3.384548               | 1.571136  | -0.265416 |
| 14               | 6                | 0              | -2.447485               | -0.786496 | 0.229968  |
| 15               | 1                | 0              | -1.912596               | -1.606678 | 0.733061  |
| 16               | 7                | 0              | -3.674877               | -0.904097 | -0.083382 |
| 17               | 6                | 0              | -4.358385               | -2.127588 | 0.285341  |
| 18               | 1                | 0              | -4.799512               | -2.581643 | -0.607654 |
| 19               | 1                | 0              | -3.705037               | -2.866418 | 0.774965  |
| 20               | 1                | 0              | -5.186970               | -1.892836 | 0.961868  |
| 21               | 8                | 0              | -1.683858               | 2.755836  | -0.520643 |
| 22               | 1                | 0              | -2.346962               | 3.432453  | -0.684805 |
| 23               | 8                | 0              | 4.010792                | -0.054642 | 0.229181  |
| 24               | 6                | 0              | 4.684914                | -1.200651 | -0.270602 |
| 25               | 1                | 0              | 4.516696                | -1.327343 | -1.345761 |
| 26               | 1                | 0              | 5.744404                | -1.025343 | -0.090488 |
| 27               | 1                | 0              | 4.373776                | -2.109660 | 0.256029  |

### Structure 32i (CHCl<sub>3</sub>)

Energy (Hartrees): -632.342068112

No imaginary frequencies

Standard orientation:

| Center<br>Number | Atomic<br>Number | Atomic<br>Type | Coordinates (Angstroms) |           |           |
|------------------|------------------|----------------|-------------------------|-----------|-----------|
|                  |                  |                | X                       | Y         | Z         |
| 1                | 6                | 0              | 1.842613                | -1.015437 | -0.403631 |
| 2                | 6                | 0              | 0.456674                | -0.849648 | -0.435331 |
| 3                | 6                | 0              | -0.165456               | 0.306479  | 0.053428  |
| 4                | 6                | 0              | 0.666927                | 1.307395  | 0.590256  |
| 5                | 6                | 0              | 2.044343                | 1.157663  | 0.628531  |
| 6                | 6                | 0              | 2.646257                | -0.004915 | 0.128850  |
| 7                | 1                | 0              | 2.275368                | -1.924300 | -0.800066 |
| 8                | 1                | 0              | -0.144948               | -1.641396 | -0.868998 |
| 9                | 1                | 0              | 0.228160                | 2.213056  | 0.988846  |
| 10               | 1                | 0              | 2.674363                | 1.934040  | 1.047904  |
| 11               | 6                | 0              | -1.642545               | 0.438248  | 0.005337  |
| 12               | 6                | 0              | -2.303002               | 1.587777  | -0.246874 |
| 13               | 1                | 0              | -3.387156               | 1.608822  | -0.238988 |
| 14               | 6                | 0              | -2.451622               | -0.769434 | 0.266345  |
| 15               | 1                | 0              | -1.947701               | -1.547812 | 0.856930  |
| 16               | 7                | 0              | -3.649203               | -0.936357 | -0.136673 |
| 17               | 6                | 0              | -4.336810               | -2.150493 | 0.265363  |
| 18               | 1                | 0              | -4.697331               | -2.676821 | -0.624486 |
| 19               | 1                | 0              | -3.709156               | -2.834733 | 0.854879  |
| 20               | 1                | 0              | -5.220882               | -1.891021 | 0.857927  |
| 21               | 8                | 0              | -1.683825               | 2.759765  | -0.533554 |
| 22               | 1                | 0              | -2.347207               | 3.442738  | -0.694100 |
| 23               | 8                | 0              | 4.007483                | -0.056151 | 0.207335  |
| 24               | 6                | 0              | 4.678752                | -1.215958 | -0.285434 |
| 25               | 1                | 0              | 4.497399                | -1.357711 | -1.355682 |
| 26               | 1                | 0              | 5.740419                | -1.034932 | -0.121470 |
| 27               | 1                | 0              | 4.377055                | -2.114407 | 0.262721  |

## Structure 32i (DMSO)

Energy (Hartrees): -632.339679055

No imaginary frequencies

Standard orientation:

| Center<br>Number | Atomic<br>Number | Atomic<br>Type | Coordinates (Angstroms) |           |           |
|------------------|------------------|----------------|-------------------------|-----------|-----------|
|                  |                  |                | X                       | Y         | Z         |
| 1                | 6                | 0              | 1.839413                | -1.022440 | -0.380813 |
| 2                | 6                | 0              | 0.453276                | -0.856937 | -0.406467 |
| 3                | 6                | 0              | -0.166036               | 0.313839  | 0.052408  |
| 4                | 6                | 0              | 0.671172                | 1.329530  | 0.554071  |
| 5                | 6                | 0              | 2.049193                | 1.180661  | 0.585013  |
| 6                | 6                | 0              | 2.648659                | 0.003468  | 0.114740  |
| 7                | 1                | 0              | 2.267528                | -1.944258 | -0.751784 |
| 8                | 1                | 0              | -0.150304               | -1.663569 | -0.808680 |
| 9                | 1                | 0              | 0.237567                | 2.246071  | 0.932593  |
| 10               | 1                | 0              | 2.679754                | 1.969897  | 0.979214  |
| 11               | 6                | 0              | -1.643337               | 0.442643  | 0.015276  |
| 12               | 6                | 0              | -2.313102               | 1.590886  | -0.221888 |
| 13               | 1                | 0              | -3.397081               | 1.610295  | -0.190568 |
| 14               | 6                | 0              | -2.446122               | -0.769170 | 0.279270  |
| 15               | 1                | 0              | -1.954906               | -1.529420 | 0.901832  |
| 16               | 7                | 0              | -3.627787               | -0.957664 | -0.161086 |
| 17               | 6                | 0              | -4.318816               | -2.169671 | 0.247632  |
| 18               | 1                | 0              | -4.646926               | -2.718369 | -0.641290 |
| 19               | 1                | 0              | -3.703571               | -2.833520 | 0.871291  |
| 20               | 1                | 0              | -5.222660               | -1.903166 | 0.806438  |
| 21               | 8                | 0              | -1.704928               | 2.765600  | -0.519644 |
| 22               | 1                | 0              | -2.376082               | 3.453010  | -0.625233 |
| 23               | 8                | 0              | 4.007752                | -0.046603 | 0.182425  |
| 24               | 6                | 0              | 4.669427                | -1.234920 | -0.262403 |
| 25               | 1                | 0              | 4.478372                | -1.424049 | -1.323146 |
| 26               | 1                | 0              | 5.733342                | -1.054236 | -0.114483 |
| 27               | 1                | 0              | 4.364522                | -2.104350 | 0.328133  |



## Structure 32i (C<sub>2</sub>H<sub>5</sub>OH)

Energy (Hartrees): -632.345320089

No imaginary frequencies

Standard orientation:

| Center<br>Number | Atomic<br>Number | Atomic<br>Type | Coordinates (Angstroms) |           |           |
|------------------|------------------|----------------|-------------------------|-----------|-----------|
|                  |                  |                | X                       | Y         | Z         |
| 1                | 6                | 0              | 1.835976                | -1.009319 | -0.410877 |
| 2                | 6                | 0              | 0.450177                | -0.840992 | -0.440186 |
| 3                | 6                | 0              | -0.169647               | 0.316599  | 0.049913  |
| 4                | 6                | 0              | 0.664578                | 1.315719  | 0.587254  |
| 5                | 6                | 0              | 2.042578                | 1.164390  | 0.621393  |
| 6                | 6                | 0              | 2.640540                | 0.000675  | 0.120406  |
| 7                | 1                | 0              | 2.266477                | -1.919848 | -0.806065 |
| 8                | 1                | 0              | -0.153370               | -1.633913 | -0.869386 |
| 9                | 1                | 0              | 0.229680                | 2.218924  | 0.996155  |
| 10               | 1                | 0              | 2.672968                | 1.939698  | 1.043064  |
| 11               | 6                | 0              | -1.647654               | 0.446497  | 0.010679  |
| 12               | 6                | 0              | -2.310693               | 1.596762  | -0.235100 |
| 13               | 1                | 0              | -3.393892               | 1.629637  | -0.207105 |
| 14               | 6                | 0              | -2.447934               | -0.763834 | 0.280795  |
| 15               | 1                | 0              | -1.953825               | -1.517369 | 0.909308  |
| 16               | 7                | 0              | -3.629085               | -0.962900 | -0.158201 |
| 17               | 6                | 0              | -4.307976               | -2.177267 | 0.265987  |
| 18               | 1                | 0              | -4.637214               | -2.737765 | -0.614893 |
| 19               | 1                | 0              | -3.684129               | -2.830409 | 0.891963  |
| 20               | 1                | 0              | -5.210649               | -1.914193 | 0.827958  |
| 21               | 8                | 0              | -1.692914               | 2.765574  | -0.539295 |
| 22               | 1                | 0              | -2.354272               | 3.460655  | -0.653536 |
| 23               | 8                | 0              | 4.005115                | -0.054078 | 0.197949  |
| 24               | 6                | 0              | 4.672971                | -1.231101 | -0.271604 |
| 25               | 1                | 0              | 4.496939                | -1.386281 | -1.340129 |
| 26               | 1                | 0              | 5.734137                | -1.054507 | -0.100632 |
| 27               | 1                | 0              | 4.355649                | -2.115070 | 0.289502  |

## Structure 32j (vacuum)

Energy (Hartrees): -632.323707519

No imaginary frequencies

Standard orientation:

| Center<br>Number | Atomic<br>Number | Atomic<br>Type | Coordinates (Angstroms) |           |           |
|------------------|------------------|----------------|-------------------------|-----------|-----------|
|                  |                  |                | X                       | Y         | Z         |
| 1                | 6                | 0              | 1.675666                | -0.845418 | -0.580212 |
| 2                | 6                | 0              | 0.294049                | -0.668667 | -0.651668 |
| 3                | 6                | 0              | -0.342251               | 0.396781  | -0.008242 |
| 4                | 6                | 0              | 0.459001                | 1.284313  | 0.730464  |
| 5                | 6                | 0              | 1.831492                | 1.115423  | 0.818285  |
| 6                | 6                | 0              | 2.452355                | 0.048654  | 0.159393  |
| 7                | 1                | 0              | 2.125476                | -1.682401 | -1.097273 |
| 8                | 1                | 0              | -0.295608               | -1.382334 | -1.210002 |
| 9                | 1                | 0              | -0.001142               | 2.116943  | 1.247036  |
| 10               | 1                | 0              | 2.443651                | 1.798588  | 1.394897  |
| 11               | 6                | 0              | -1.811553               | 0.584917  | -0.098549 |
| 12               | 6                | 0              | -2.397524               | 1.785620  | -0.295896 |
| 13               | 1                | 0              | -3.479805               | 1.870064  | -0.339753 |
| 14               | 6                | 0              | -2.750369               | -0.537427 | 0.031783  |
| 15               | 1                | 0              | -3.814699               | -0.254768 | -0.045544 |
| 16               | 7                | 0              | -2.416823               | -1.748761 | 0.223647  |
| 17               | 6                | 0              | -3.473093               | -2.732729 | 0.345224  |
| 18               | 1                | 0              | -3.342899               | -3.505284 | -0.419656 |
| 19               | 1                | 0              | -3.391882               | -3.233159 | 1.315445  |
| 20               | 1                | 0              | -4.485772               | -2.309005 | 0.250000  |
| 21               | 8                | 0              | -1.705859               | 2.945853  | -0.454069 |
| 22               | 1                | 0              | -2.315477               | 3.665988  | -0.638456 |
| 23               | 8                | 0              | 3.809063                | -0.034185 | 0.301636  |
| 24               | 6                | 0              | 4.492960                | -1.102320 | -0.337281 |
| 25               | 1                | 0              | 5.545399                | -0.973442 | -0.088937 |
| 26               | 1                | 0              | 4.150077                | -2.075226 | 0.031696  |
| 27               | 1                | 0              | 4.370405                | -1.062861 | -1.425335 |

## Structure 32j (CHCl<sub>3</sub>)

Energy (Hartrees): -632.344157269

No imaginary frequencies

Standard orientation:

| Center<br>Number | Atomic<br>Number | Atomic<br>Type | Coordinates (Angstroms) |           |           |
|------------------|------------------|----------------|-------------------------|-----------|-----------|
|                  |                  |                | X                       | Y         | Z         |
| 1                | 6                | 0              | 1.696462                | -0.753940 | -0.693469 |
| 2                | 6                | 0              | 0.315917                | -0.568535 | -0.781472 |
| 3                | 6                | 0              | -0.347426               | 0.388915  | -0.008510 |
| 4                | 6                | 0              | 0.424182                | 1.161089  | 0.875636  |
| 5                | 6                | 0              | 1.796390                | 0.984773  | 0.980265  |
| 6                | 6                | 0              | 2.444553                | 0.024928  | 0.193498  |
| 7                | 1                | 0              | 2.168779                | -1.503958 | -1.314114 |
| 8                | 1                | 0              | -0.248316               | -1.185983 | -1.469436 |
| 9                | 1                | 0              | -0.058125               | 1.907496  | 1.495809  |
| 10               | 1                | 0              | 2.382825                | 1.581106  | 1.670203  |
| 11               | 6                | 0              | -1.817343               | 0.587671  | -0.115803 |
| 12               | 6                | 0              | -2.379002               | 1.798801  | -0.326857 |
| 13               | 1                | 0              | -3.457824               | 1.912440  | -0.383694 |
| 14               | 6                | 0              | -2.760281               | -0.525709 | 0.016877  |
| 15               | 1                | 0              | -3.820391               | -0.246641 | -0.087615 |
| 16               | 7                | 0              | -2.428990               | -1.735465 | 0.243797  |
| 17               | 6                | 0              | -3.493690               | -2.714841 | 0.362208  |
| 18               | 1                | 0              | -3.357965               | -3.498584 | -0.391018 |
| 19               | 1                | 0              | -3.430911               | -3.205115 | 1.339487  |
| 20               | 1                | 0              | -4.501121               | -2.287095 | 0.246311  |
| 21               | 8                | 0              | -1.657270               | 2.933180  | -0.488680 |
| 22               | 1                | 0              | -2.250644               | 3.675365  | -0.660033 |
| 23               | 8                | 0              | 3.795343                | -0.076693 | 0.363696  |
| 24               | 6                | 0              | 4.509332                | -1.047466 | -0.401414 |
| 25               | 1                | 0              | 5.550699                | -0.960997 | -0.093173 |
| 26               | 1                | 0              | 4.153970                | -2.061135 | -0.190570 |
| 27               | 1                | 0              | 4.432812                | -0.844643 | -1.474620 |

## Structure 32j (DMSO)

Energy (Hartrees): -632.343360336

No imaginary frequencies

Standard orientation:

| Center<br>Number | Atomic<br>Number | Atomic<br>Type | Coordinates (Angstroms) |           |           |
|------------------|------------------|----------------|-------------------------|-----------|-----------|
|                  |                  |                | X                       | Y         | Z         |
| 1                | 6                | 0              | 1.717276                | -0.648904 | -0.783373 |
| 2                | 6                | 0              | 0.338231                | -0.454701 | -0.884506 |
| 3                | 6                | 0              | -0.352038               | 0.387659  | -0.008042 |
| 4                | 6                | 0              | 0.388629                | 1.036156  | 0.993256  |
| 5                | 6                | 0              | 1.759495                | 0.850335  | 1.111670  |
| 6                | 6                | 0              | 2.436266                | 0.005520  | 0.222029  |
| 7                | 1                | 0              | 2.211646                | -1.305488 | -1.487079 |
| 8                | 1                | 0              | -0.201630               | -0.970305 | -1.670574 |
| 9                | 1                | 0              | -0.116020               | 1.689976  | 1.695821  |
| 10               | 1                | 0              | 2.320900                | 1.351542  | 1.892322  |
| 11               | 6                | 0              | -1.822261               | 0.590169  | -0.126300 |
| 12               | 6                | 0              | -2.378188               | 1.804143  | -0.332496 |
| 13               | 1                | 0              | -3.456202               | 1.923893  | -0.393823 |
| 14               | 6                | 0              | -2.759893               | -0.525892 | -0.000192 |
| 15               | 1                | 0              | -3.820159               | -0.256739 | -0.112865 |
| 16               | 7                | 0              | -2.416803               | -1.733153 | 0.233953  |
| 17               | 6                | 0              | -3.475230               | -2.722628 | 0.350374  |
| 18               | 1                | 0              | -3.328546               | -3.509271 | -0.397945 |
| 19               | 1                | 0              | -3.415267               | -3.207182 | 1.330924  |
| 20               | 1                | 0              | -4.483717               | -2.302492 | 0.225549  |
| 21               | 8                | 0              | -1.647277               | 2.932506  | -0.485239 |
| 22               | 1                | 0              | -2.240614               | 3.681000  | -0.633552 |
| 23               | 8                | 0              | 3.779884                | -0.115711 | 0.413831  |
| 24               | 6                | 0              | 4.516686                | -0.976294 | -0.459818 |
| 25               | 1                | 0              | 5.549802                | -0.932642 | -0.117380 |
| 26               | 1                | 0              | 4.158530                | -2.008340 | -0.396984 |
| 27               | 1                | 0              | 4.464203                | -0.629619 | -1.496435 |

## Structure 32j (C<sub>2</sub>H<sub>5</sub>OH)

Energy (Hartrees): -632.348815618

No imaginary frequencies

Standard orientation:

| Center<br>Number | Atomic<br>Number | Atomic<br>Type | Coordinates (Angstroms) |           |           |
|------------------|------------------|----------------|-------------------------|-----------|-----------|
|                  |                  |                | X                       | Y         | Z         |
| 1                | 6                | 0              | 1.720552                | -0.644155 | -0.794559 |
| 2                | 6                | 0              | 0.342990                | -0.441766 | -0.899227 |
| 3                | 6                | 0              | -0.349482               | 0.376241  | -0.001880 |
| 4                | 6                | 0              | 0.385389                | 0.990939  | 1.024276  |
| 5                | 6                | 0              | 1.755107                | 0.797174  | 1.145828  |
| 6                | 6                | 0              | 2.432411                | -0.021418 | 0.234098  |
| 7                | 1                | 0              | 2.218336                | -1.281113 | -1.513685 |
| 8                | 1                | 0              | -0.193654               | -0.930587 | -1.704621 |
| 9                | 1                | 0              | -0.122928               | 1.625321  | 1.742249  |
| 10               | 1                | 0              | 2.313944                | 1.273738  | 1.943773  |
| 11               | 6                | 0              | -1.816982               | 0.595920  | -0.129304 |
| 12               | 6                | 0              | -2.348384               | 1.820075  | -0.339841 |
| 13               | 1                | 0              | -3.421737               | 1.966593  | -0.415209 |
| 14               | 6                | 0              | -2.771920               | -0.504634 | -0.011963 |
| 15               | 1                | 0              | -3.825509               | -0.218567 | -0.143810 |
| 16               | 7                | 0              | -2.454087               | -1.716540 | 0.236563  |
| 17               | 6                | 0              | -3.536100               | -2.682601 | 0.336329  |
| 18               | 1                | 0              | -3.398430               | -3.470162 | -0.412573 |
| 19               | 1                | 0              | -3.500701               | -3.172282 | 1.315216  |
| 20               | 1                | 0              | -4.533346               | -2.240228 | 0.200130  |
| 21               | 8                | 0              | -1.591883               | 2.934581  | -0.479017 |
| 22               | 1                | 0              | -2.161188               | 3.697990  | -0.643602 |
| 23               | 8                | 0              | 3.780677                | -0.151066 | 0.430182  |
| 24               | 6                | 0              | 4.531448                | -0.957920 | -0.484355 |
| 25               | 1                | 0              | 5.563772                | -0.910347 | -0.139985 |
| 26               | 1                | 0              | 4.190783                | -1.997301 | -0.466992 |
| 27               | 1                | 0              | 4.468746                | -0.562512 | -1.502557 |

## Structure 32k (vacuum)

Energy (Hartrees): -632.323282313

No imaginary frequencies

Standard orientation:

| Center<br>Number | Atomic<br>Number | Atomic<br>Type | Coordinates (Angstroms) |           |           |
|------------------|------------------|----------------|-------------------------|-----------|-----------|
|                  |                  |                | X                       | Y         | Z         |
| 1                | 6                | 0              | -1.850883               | 0.708436  | -0.609836 |
| 2                | 6                | 0              | -0.463004               | 0.597247  | -0.677458 |
| 3                | 6                | 0              | 0.223451                | -0.423069 | -0.011806 |
| 4                | 6                | 0              | -0.536326               | -1.323486 | 0.753145  |
| 5                | 6                | 0              | -1.918724               | -1.228148 | 0.828056  |
| 6                | 6                | 0              | -2.587975               | -0.210211 | 0.142384  |
| 7                | 1                | 0              | -2.339680               | 1.512160  | -1.144043 |
| 8                | 1                | 0              | 0.093291                | 1.322707  | -1.255453 |
| 9                | 1                | 0              | -0.032112               | -2.098421 | 1.320278  |
| 10               | 1                | 0              | -2.497241               | -1.921880 | 1.426384  |
| 11               | 6                | 0              | 1.698357                | -0.572474 | -0.121343 |
| 12               | 6                | 0              | 2.211529                | -1.796422 | -0.365774 |
| 13               | 1                | 0              | 1.566749                | -2.652779 | -0.535003 |
| 14               | 6                | 0              | 2.610145                | 0.567168  | 0.038519  |
| 15               | 1                | 0              | 3.676246                | 0.331726  | -0.076580 |
| 16               | 7                | 0              | 2.219786                | 1.752083  | 0.294590  |
| 17               | 6                | 0              | 3.232802                | 2.778982  | 0.433859  |
| 18               | 1                | 0              | 3.042782                | 3.577454  | -0.290972 |
| 19               | 1                | 0              | 3.151772                | 3.231654  | 1.427383  |
| 20               | 1                | 0              | 4.260850                | 2.410201  | 0.294365  |
| 21               | 8                | 0              | 3.555342                | -2.044058 | -0.410024 |
| 22               | 1                | 0              | 3.709045                | -2.948227 | -0.696594 |
| 23               | 8                | 0              | -3.948194               | -0.191217 | 0.276248  |
| 24               | 6                | 0              | -4.679972               | 0.833007  | -0.381680 |
| 25               | 1                | 0              | -4.385911               | 1.826965  | -0.027055 |
| 26               | 1                | 0              | -4.551998               | 0.782293  | -1.468656 |
| 27               | 1                | 0              | -5.725884               | 0.657578  | -0.134368 |

### Structure 32k (CHCl<sub>3</sub>)

Energy (Hartrees): -632.342926527

No imaginary frequencies

Standard orientation:

| Center<br>Number | Atomic<br>Number | Atomic<br>Type | Coordinates (Angstroms) |           |           |
|------------------|------------------|----------------|-------------------------|-----------|-----------|
|                  |                  |                | X                       | Y         | Z         |
| 1                | 6                | 0              | -1.865191               | 0.661876  | -0.670396 |
| 2                | 6                | 0              | -0.477701               | 0.544923  | -0.750809 |
| 3                | 6                | 0              | 0.223213                | -0.421975 | -0.021248 |
| 4                | 6                | 0              | -0.523276               | -1.269163 | 0.814685  |
| 5                | 6                | 0              | -1.905809               | -1.169045 | 0.903192  |
| 6                | 6                | 0              | -2.588634               | -0.201165 | 0.158848  |
| 7                | 1                | 0              | -2.365098               | 1.422937  | -1.254971 |
| 8                | 1                | 0              | 0.063822                | 1.221595  | -1.400286 |
| 9                | 1                | 0              | -0.010591               | -2.009244 | 1.419759  |
| 10               | 1                | 0              | -2.470250               | -1.825080 | 1.556285  |
| 11               | 6                | 0              | 1.699998                | -0.569606 | -0.136706 |
| 12               | 6                | 0              | 2.213977                | -1.798229 | -0.368948 |
| 13               | 1                | 0              | 1.572969                | -2.660442 | -0.521556 |
| 14               | 6                | 0              | 2.606862                | 0.571654  | 0.014826  |
| 15               | 1                | 0              | 3.668638                | 0.352027  | -0.151304 |
| 16               | 7                | 0              | 2.225784                | 1.748887  | 0.326984  |
| 17               | 6                | 0              | 3.246108                | 2.773917  | 0.451161  |
| 18               | 1                | 0              | 3.015588                | 3.602586  | -0.226959 |
| 19               | 1                | 0              | 3.224710                | 3.184605  | 1.466284  |
| 20               | 1                | 0              | 4.263096                | 2.413700  | 0.236413  |
| 21               | 8                | 0              | 3.551132                | -2.043644 | -0.425793 |
| 22               | 1                | 0              | 3.698854                | -2.965724 | -0.669725 |
| 23               | 8                | 0              | -3.945430               | -0.172930 | 0.310183  |
| 24               | 6                | 0              | -4.692278               | 0.809717  | -0.407136 |
| 25               | 1                | 0              | -4.404292               | 1.823630  | -0.111180 |
| 26               | 1                | 0              | -4.571616               | 0.692109  | -1.488810 |
| 27               | 1                | 0              | -5.735541               | 0.640252  | -0.142776 |

## Structure 32k (DMSO)

Energy (Hartrees): -632.341402284

No imaginary frequencies

Standard orientation:

| Center<br>Number | Atomic<br>Number | Atomic<br>Type | Coordinates (Angstroms) |           |           |
|------------------|------------------|----------------|-------------------------|-----------|-----------|
|                  |                  |                | X                       | Y         | Z         |
| 1                | 6                | 0              | -1.870299               | 0.644994  | -0.689192 |
| 2                | 6                | 0              | -0.483092               | 0.524532  | -0.775639 |
| 3                | 6                | 0              | 0.223657                | -0.420242 | -0.022135 |
| 4                | 6                | 0              | -0.516457               | -1.244175 | 0.842113  |
| 5                | 6                | 0              | -1.898812               | -1.140420 | 0.937303  |
| 6                | 6                | 0              | -2.588661               | -0.193366 | 0.171102  |
| 7                | 1                | 0              | -2.374161               | 1.386282  | -1.295436 |
| 8                | 1                | 0              | 0.051946                | 1.177530  | -1.455132 |
| 9                | 1                | 0              | -0.000330               | -1.972388 | 1.458673  |
| 10               | 1                | 0              | -2.455725               | -1.782069 | 1.611007  |
| 11               | 6                | 0              | 1.700099                | -0.569071 | -0.144652 |
| 12               | 6                | 0              | 2.211408                | -1.801055 | -0.368645 |
| 13               | 1                | 0              | 1.567385                | -2.664118 | -0.503942 |
| 14               | 6                | 0              | 2.604755                | 0.573666  | -0.001058 |
| 15               | 1                | 0              | 3.663181                | 0.364848  | -0.196109 |
| 16               | 7                | 0              | 2.227545                | 1.745253  | 0.340899  |
| 17               | 6                | 0              | 3.249708                | 2.771803  | 0.456508  |
| 18               | 1                | 0              | 3.002301                | 3.610296  | -0.203548 |
| 19               | 1                | 0              | 3.253600                | 3.166533  | 1.478279  |
| 20               | 1                | 0              | 4.260141                | 2.415221  | 0.210647  |
| 21               | 8                | 0              | 3.545600                | -2.046848 | -0.434444 |
| 22               | 1                | 0              | 3.688672                | -2.974471 | -0.663517 |
| 23               | 8                | 0              | -3.941854               | -0.158887 | 0.330581  |
| 24               | 6                | 0              | -4.693158               | 0.791223  | -0.430825 |
| 25               | 1                | 0              | -4.404960               | 1.817670  | -0.183946 |
| 26               | 1                | 0              | -4.574255               | 0.622544  | -1.505488 |
| 27               | 1                | 0              | -5.735466               | 0.633893  | -0.156163 |



## Structure 32k (C<sub>2</sub>H<sub>5</sub>OH)

Energy (Hartrees): -632.346693103

No imaginary frequencies

Standard orientation:

| Center<br>Number | Atomic<br>Number | Atomic<br>Type | Coordinates (Angstroms) |           |           |
|------------------|------------------|----------------|-------------------------|-----------|-----------|
|                  |                  |                | X                       | Y         | Z         |
| 1                | 6                | 0              | -1.871590               | 0.635572  | -0.700946 |
| 2                | 6                | 0              | -0.484514               | 0.514129  | -0.785472 |
| 3                | 6                | 0              | 0.222701                | -0.417159 | -0.015821 |
| 4                | 6                | 0              | -0.515931               | -1.226455 | 0.862937  |
| 5                | 6                | 0              | -1.898738               | -1.121881 | 0.956433  |
| 6                | 6                | 0              | -2.586420               | -0.189078 | 0.173238  |
| 7                | 1                | 0              | -2.376773               | 1.365778  | -1.319450 |
| 8                | 1                | 0              | 0.049486                | 1.154460  | -1.477744 |
| 9                | 1                | 0              | 0.000869                | -1.943373 | 1.492124  |
| 10               | 1                | 0              | -2.456929               | -1.751266 | 1.640926  |
| 11               | 6                | 0              | 1.698890                | -0.568876 | -0.141039 |
| 12               | 6                | 0              | 2.205745                | -1.801714 | -0.370724 |
| 13               | 1                | 0              | 1.562567                | -2.664786 | -0.506977 |
| 14               | 6                | 0              | 2.605738                | 0.572163  | -0.003793 |
| 15               | 1                | 0              | 3.659768                | 0.365317  | -0.223183 |
| 16               | 7                | 0              | 2.236821                | 1.741323  | 0.356528  |
| 17               | 6                | 0              | 3.263576                | 2.766104  | 0.449863  |
| 18               | 1                | 0              | 2.999862                | 3.607603  | -0.199754 |
| 19               | 1                | 0              | 3.296444                | 3.157515  | 1.472222  |
| 20               | 1                | 0              | 4.266725                | 2.410354  | 0.175307  |
| 21               | 8                | 0              | 3.539930                | -2.053438 | -0.443184 |
| 22               | 1                | 0              | 3.682499                | -2.980231 | -0.675194 |
| 23               | 8                | 0              | -3.945812               | -0.154220 | 0.331038  |
| 24               | 6                | 0              | -4.699940               | 0.787303  | -0.441001 |
| 25               | 1                | 0              | -4.412261               | 1.815415  | -0.202107 |
| 26               | 1                | 0              | -4.578607               | 0.605722  | -1.512948 |
| 27               | 1                | 0              | -5.741441               | 0.628850  | -0.163811 |

### Structure 32l (vacuum)

Energy (Hartrees): -632.322700994

No imaginary frequencies

Standard orientation:

| Center<br>Number | Atomic<br>Number | Atomic<br>Type | Coordinates (Angstroms) |           |           |
|------------------|------------------|----------------|-------------------------|-----------|-----------|
|                  |                  |                | X                       | Y         | Z         |
| 1                | 6                | 0              | -1.848420               | 0.693238  | -0.632573 |
| 2                | 6                | 0              | -0.461504               | 0.575495  | -0.706893 |
| 3                | 6                | 0              | 0.226377                | -0.426410 | -0.016452 |
| 4                | 6                | 0              | -0.529062               | -1.303853 | 0.777930  |
| 5                | 6                | 0              | -1.910573               | -1.202426 | 0.859602  |
| 6                | 6                | 0              | -2.582139               | -0.201779 | 0.151056  |
| 7                | 1                | 0              | -2.339223               | 1.482057  | -1.186763 |
| 8                | 1                | 0              | 0.091233                | 1.281653  | -1.312417 |
| 9                | 1                | 0              | -0.022772               | -2.067912 | 1.357723  |
| 10               | 1                | 0              | -2.486772               | -1.879619 | 1.478665  |
| 11               | 6                | 0              | 1.702346                | -0.583149 | -0.130389 |
| 12               | 6                | 0              | 2.200520                | -1.818236 | -0.379492 |
| 13               | 1                | 0              | 1.542759                | -2.661391 | -0.549802 |
| 14               | 6                | 0              | 2.597828                | 0.562418  | 0.031475  |
| 15               | 1                | 0              | 3.677921                | 0.366230  | -0.107208 |
| 16               | 7                | 0              | 2.218659                | 1.744441  | 0.309789  |
| 17               | 6                | 0              | 3.227108                | 2.774310  | 0.442666  |
| 18               | 1                | 0              | 3.021248                | 3.579417  | -0.269955 |
| 19               | 1                | 0              | 3.162552                | 3.215009  | 1.442468  |
| 20               | 1                | 0              | 4.255126                | 2.412118  | 0.280313  |
| 21               | 8                | 0              | 3.497083                | -2.209065 | -0.462727 |
| 22               | 1                | 0              | 4.091706                | -1.472649 | -0.279256 |
| 23               | 8                | 0              | -3.940784               | -0.175331 | 0.293874  |
| 24               | 6                | 0              | -4.675949               | 0.826719  | -0.394022 |
| 25               | 1                | 0              | -4.380541               | 1.831782  | -0.073457 |
| 26               | 1                | 0              | -4.552846               | 0.740124  | -1.479216 |
| 27               | 1                | 0              | -5.720578               | 0.659304  | -0.136254 |

## Structure 32l (CHCl<sub>3</sub>)

Energy (Hartrees): -632.341472716

No imaginary frequencies

Standard orientation:

| Center<br>Number | Atomic<br>Number | Atomic<br>Type | Coordinates (Angstroms) |           |           |
|------------------|------------------|----------------|-------------------------|-----------|-----------|
|                  |                  |                | X                       | Y         | Z         |
| 1                | 6                | 0              | -1.861153               | 0.641717  | -0.694007 |
| 2                | 6                | 0              | -0.474524               | 0.519731  | -0.779441 |
| 3                | 6                | 0              | 0.228908                | -0.423483 | -0.022732 |
| 4                | 6                | 0              | -0.511930               | -1.241959 | 0.845233  |
| 5                | 6                | 0              | -1.893747               | -1.136380 | 0.939715  |
| 6                | 6                | 0              | -2.580045               | -0.192470 | 0.168371  |
| 7                | 1                | 0              | -2.364009               | 1.382981  | -1.301058 |
| 8                | 1                | 0              | 0.063280                | 1.172932  | -1.456035 |
| 9                | 1                | 0              | 0.004021                | -1.965476 | 1.467351  |
| 10               | 1                | 0              | -2.454995               | -1.771142 | 1.616089  |
| 11               | 6                | 0              | 1.706329                | -0.579469 | -0.144762 |
| 12               | 6                | 0              | 2.198747                | -1.819141 | -0.383952 |
| 13               | 1                | 0              | 1.536949                | -2.662594 | -0.541415 |
| 14               | 6                | 0              | 2.601124                | 0.568441  | 0.005127  |
| 15               | 1                | 0              | 3.669781                | 0.390828  | -0.197043 |
| 16               | 7                | 0              | 2.220053                | 1.737008  | 0.344833  |
| 17               | 6                | 0              | 3.227017                | 2.775482  | 0.453252  |
| 18               | 1                | 0              | 2.964362                | 3.608156  | -0.207727 |
| 19               | 1                | 0              | 3.228167                | 3.173040  | 1.473569  |
| 20               | 1                | 0              | 4.243185                | 2.434396  | 0.204310  |
| 21               | 8                | 0              | 3.491861                | -2.214091 | -0.470587 |
| 22               | 1                | 0              | 4.099866                | -1.486655 | -0.279858 |
| 23               | 8                | 0              | -3.935550               | -0.157741 | 0.326918  |
| 24               | 6                | 0              | -4.687460               | 0.795549  | -0.424187 |
| 25               | 1                | 0              | -4.399478               | 1.820698  | -0.169917 |
| 26               | 1                | 0              | -4.572585               | 0.634810  | -1.500920 |
| 27               | 1                | 0              | -5.728998               | 0.635524  | -0.147528 |

## Structure 321 (DMSO)

Energy (Hartrees): -632.340323618

No imaginary frequencies

Standard orientation:

| Center<br>Number | Atomic<br>Number | Atomic<br>Type | Coordinates (Angstroms) |           |           |
|------------------|------------------|----------------|-------------------------|-----------|-----------|
|                  |                  |                | X                       | Y         | Z         |
| 1                | 6                | 0              | -1.865053               | 0.624877  | -0.708483 |
| 2                | 6                | 0              | -0.478647               | 0.500030  | -0.798338 |
| 3                | 6                | 0              | 0.229218                | -0.429866 | -0.028082 |
| 4                | 6                | 0              | -0.507752               | -1.235892 | 0.854798  |
| 5                | 6                | 0              | -1.889601               | -1.127671 | 0.953720  |
| 6                | 6                | 0              | -2.580948               | -0.194056 | 0.172511  |
| 7                | 1                | 0              | -2.370266               | 1.354522  | -1.327613 |
| 8                | 1                | 0              | 0.054728                | 1.138676  | -1.492836 |
| 9                | 1                | 0              | 0.010019                | -1.953428 | 1.482448  |
| 10               | 1                | 0              | -2.444792               | -1.754939 | 1.642199  |
| 11               | 6                | 0              | 1.707168                | -0.579331 | -0.150822 |
| 12               | 6                | 0              | 2.208438                | -1.818197 | -0.376880 |
| 13               | 1                | 0              | 1.551859                | -2.669252 | -0.515797 |
| 14               | 6                | 0              | 2.594748                | 0.574333  | -0.006077 |
| 15               | 1                | 0              | 3.660662                | 0.408839  | -0.222525 |
| 16               | 7                | 0              | 2.209597                | 1.737093  | 0.353073  |
| 17               | 6                | 0              | 3.215979                | 2.779105  | 0.461208  |
| 18               | 1                | 0              | 2.944076                | 3.617637  | -0.188810 |
| 19               | 1                | 0              | 3.228023                | 3.165703  | 1.485822  |
| 20               | 1                | 0              | 4.228275                | 2.441231  | 0.197284  |
| 21               | 8                | 0              | 3.502990                | -2.201622 | -0.467448 |
| 22               | 1                | 0              | 4.105827                | -1.460002 | -0.311113 |
| 23               | 8                | 0              | -3.932939               | -0.152223 | 0.338439  |
| 24               | 6                | 0              | -4.684652               | 0.791648  | -0.430331 |
| 25               | 1                | 0              | -4.382853               | 1.819224  | -0.205624 |
| 26               | 1                | 0              | -4.581863               | 0.602671  | -1.503267 |
| 27               | 1                | 0              | -5.724676               | 0.650362  | -0.138947 |

## Structure 321 (C<sub>2</sub>H<sub>5</sub>OH)

Energy (Hartrees): -632.344937003

No imaginary frequencies

Standard orientation:

| Center<br>Number | Atomic<br>Number | Atomic<br>Type | Coordinates (Angstroms) |           |           |
|------------------|------------------|----------------|-------------------------|-----------|-----------|
|                  |                  |                | X                       | Y         | Z         |
| 1                | 6                | 0              | -1.865981               | 0.608209  | -0.727419 |
| 2                | 6                | 0              | -0.479528               | 0.482093  | -0.813940 |
| 3                | 6                | 0              | 0.229817                | -0.419627 | -0.012473 |
| 4                | 6                | 0              | -0.503909               | -1.193768 | 0.900443  |
| 5                | 6                | 0              | -1.886215               | -1.083540 | 0.997389  |
| 6                | 6                | 0              | -2.576932               | -0.181229 | 0.181886  |
| 7                | 1                | 0              | -2.373800               | 1.313723  | -1.371855 |
| 8                | 1                | 0              | 0.051855                | 1.094583  | -1.533175 |
| 9                | 1                | 0              | 0.015708                | -1.888552 | 1.551887  |
| 10               | 1                | 0              | -2.441475               | -1.685878 | 1.708049  |
| 11               | 6                | 0              | 1.707433                | -0.578911 | -0.140850 |
| 12               | 6                | 0              | 2.189950                | -1.822423 | -0.379155 |
| 13               | 1                | 0              | 1.519673                | -2.663851 | -0.511188 |
| 14               | 6                | 0              | 2.602957                | 0.568539  | 0.001049  |
| 15               | 1                | 0              | 3.667452                | 0.391284  | -0.208870 |
| 16               | 7                | 0              | 2.223348                | 1.736255  | 0.352709  |
| 17               | 6                | 0              | 3.238161                | 2.771959  | 0.448726  |
| 18               | 1                | 0              | 2.970172                | 3.606527  | -0.207828 |
| 19               | 1                | 0              | 3.257998                | 3.168912  | 1.469097  |
| 20               | 1                | 0              | 4.247279                | 2.425732  | 0.183953  |
| 21               | 8                | 0              | 3.479297                | -2.227091 | -0.493098 |
| 22               | 1                | 0              | 4.104459                | -1.501017 | -0.356936 |
| 23               | 8                | 0              | -3.935496               | -0.139475 | 0.343841  |
| 24               | 6                | 0              | -4.692583               | 0.771378  | -0.461403 |
| 25               | 1                | 0              | -4.402254               | 1.807711  | -0.265116 |
| 26               | 1                | 0              | -4.577186               | 0.547592  | -1.526005 |
| 27               | 1                | 0              | -5.732747               | 0.625897  | -0.172437 |

### Structure 33a (vacuum)

Energy (Hartrees): -722.362481898

No imaginary frequencies

Standard orientation:

| Center<br>Number | Atomic<br>Number | Atomic<br>Type | Coordinates (Angstroms) |           |           |
|------------------|------------------|----------------|-------------------------|-----------|-----------|
|                  |                  |                | X                       | Y         | Z         |
| 1                | 6                | 0              | 1.950915                | 1.109030  | 0.459639  |
| 2                | 6                | 0              | 0.572013                | 1.254369  | 0.423425  |
| 3                | 6                | 0              | -0.262916               | 0.231381  | -0.068780 |
| 4                | 6                | 0              | 0.352682                | -0.950795 | -0.525642 |
| 5                | 6                | 0              | 1.728474                | -1.118087 | -0.478775 |
| 6                | 6                | 0              | 2.517571                | -0.081552 | 0.012594  |
| 7                | 1                | 0              | 2.589513                | 1.892167  | 0.844644  |
| 8                | 1                | 0              | 0.133795                | 2.165847  | 0.811055  |
| 9                | 1                | 0              | -0.253607               | -1.739821 | -0.955028 |
| 10               | 1                | 0              | 2.199236                | -2.024217 | -0.834804 |
| 11               | 6                | 0              | -1.726793               | 0.399462  | -0.104534 |
| 12               | 6                | 0              | -2.561714               | -0.675035 | 0.176060  |
| 13               | 1                | 0              | -2.125350               | -1.628947 | 0.462111  |
| 14               | 6                | 0              | -2.306792               | 1.679862  | -0.438247 |
| 15               | 1                | 0              | -1.593656               | 2.488046  | -0.678362 |
| 16               | 1                | 0              | -4.292273               | 0.266041  | -0.096025 |
| 17               | 7                | 0              | -3.892495               | -0.642783 | 0.150353  |
| 18               | 6                | 0              | -4.751358               | -1.750257 | 0.529307  |
| 19               | 1                | 0              | -5.466743               | -1.968035 | -0.267544 |
| 20               | 1                | 0              | -4.146277               | -2.640932 | 0.705540  |
| 21               | 1                | 0              | -5.307293               | -1.520550 | 1.443074  |
| 22               | 8                | 0              | -3.518298               | 1.915173  | -0.496856 |
| 23               | 7                | 0              | 3.977863                | -0.246448 | 0.056444  |
| 24               | 8                | 0              | 4.646411                | 0.686655  | 0.489238  |
| 25               | 8                | 0              | 4.445960                | -1.308736 | -0.341446 |

### Structure 33a (CHCl<sub>3</sub>)

Energy (Hartrees): -722.383730141

No imaginary frequencies

Standard orientation:

| Center<br>Number | Atomic<br>Number | Atomic<br>Type | Coordinates (Angstroms) |           |           |
|------------------|------------------|----------------|-------------------------|-----------|-----------|
|                  |                  |                | X                       | Y         | Z         |
| 1                | 6                | 0              | 1.958718                | 1.127412  | 0.416376  |
| 2                | 6                | 0              | 0.581975                | 1.277312  | 0.389649  |
| 3                | 6                | 0              | -0.266704               | 0.237812  | -0.050658 |
| 4                | 6                | 0              | 0.341933                | -0.969761 | -0.457136 |
| 5                | 6                | 0              | 1.715232                | -1.140233 | -0.420470 |
| 6                | 6                | 0              | 2.519040                | -0.085127 | 0.012954  |
| 7                | 1                | 0              | 2.595802                | 1.929113  | 0.764193  |
| 8                | 1                | 0              | 0.157135                | 2.207426  | 0.745882  |
| 9                | 1                | 0              | -0.268345               | -1.779466 | -0.837912 |
| 10               | 1                | 0              | 2.167608                | -2.067724 | -0.743998 |
| 11               | 6                | 0              | -1.727116               | 0.412540  | -0.086898 |
| 12               | 6                | 0              | -2.567714               | -0.677167 | 0.164391  |
| 13               | 1                | 0              | -2.134214               | -1.638754 | 0.424122  |
| 14               | 6                | 0              | -2.294183               | 1.697211  | -0.394569 |
| 15               | 1                | 0              | -1.578888               | 2.504362  | -0.623676 |
| 16               | 1                | 0              | -4.307296               | 0.257536  | -0.084420 |
| 17               | 7                | 0              | -3.890080               | -0.646335 | 0.142515  |
| 18               | 6                | 0              | -4.750321               | -1.776170 | 0.456057  |
| 19               | 1                | 0              | -5.407240               | -1.995016 | -0.389400 |
| 20               | 1                | 0              | -4.140508               | -2.654773 | 0.668458  |
| 21               | 1                | 0              | -5.367886               | -1.552052 | 1.329772  |
| 22               | 8                | 0              | -3.509384               | 1.948544  | -0.450766 |
| 23               | 7                | 0              | 3.965989                | -0.252782 | 0.042720  |
| 24               | 8                | 0              | 4.658692                | 0.698905  | 0.405560  |
| 25               | 8                | 0              | 4.436606                | -1.339925 | -0.295776 |

### Structure 33a (DMSO)

Energy (Hartrees): -722.384317921

No imaginary frequencies

Standard orientation:

| Center<br>Number | Atomic<br>Number | Atomic<br>Type | Coordinates (Angstroms) |           |           |
|------------------|------------------|----------------|-------------------------|-----------|-----------|
|                  |                  |                | X                       | Y         | Z         |
| 1                | 6                | 0              | 1.959062                | 1.129894  | 0.407316  |
| 2                | 6                | 0              | 0.583180                | 1.281244  | 0.382539  |
| 3                | 6                | 0              | -0.269058               | 0.237723  | -0.044713 |
| 4                | 6                | 0              | 0.337604                | -0.976157 | -0.439157 |
| 5                | 6                | 0              | 1.710531                | -1.146073 | -0.406953 |
| 6                | 6                | 0              | 2.518595                | -0.087233 | 0.013093  |
| 7                | 1                | 0              | 2.595037                | 1.936014  | 0.746851  |
| 8                | 1                | 0              | 0.162091                | 2.216417  | 0.729483  |
| 9                | 1                | 0              | -0.273235               | -1.792471 | -0.804483 |
| 10               | 1                | 0              | 2.157182                | -2.079009 | -0.722731 |
| 11               | 6                | 0              | -1.727582               | 0.415828  | -0.080861 |
| 12               | 6                | 0              | -2.569768               | -0.677655 | 0.163489  |
| 13               | 1                | 0              | -2.136595               | -1.641020 | 0.415936  |
| 14               | 6                | 0              | -2.287468               | 1.703066  | -0.386715 |
| 15               | 1                | 0              | -1.565954               | 2.505839  | -0.611060 |
| 16               | 1                | 0              | -4.314996               | 0.252081  | -0.080815 |
| 17               | 7                | 0              | -3.889856               | -0.647966 | 0.142637  |
| 18               | 6                | 0              | -4.748116               | -1.784397 | 0.441813  |
| 19               | 1                | 0              | -5.384490               | -2.009555 | -0.417546 |
| 20               | 1                | 0              | -4.135048               | -2.655762 | 0.671771  |
| 21               | 1                | 0              | -5.386213               | -1.557623 | 1.299560  |
| 22               | 8                | 0              | -3.501242               | 1.963712  | -0.449165 |
| 23               | 7                | 0              | 3.961849                | -0.254126 | 0.039085  |
| 24               | 8                | 0              | 4.657936                | 0.697458  | 0.403598  |
| 25               | 8                | 0              | 4.435354                | -1.340884 | -0.304199 |



### Structure 33a (C<sub>2</sub>H<sub>5</sub>OH)

Energy (Hartrees): -722.385520289

No imaginary frequencies

Standard orientation:

| Center<br>Number | Atomic<br>Number | Atomic<br>Type | Coordinates (Angstroms) |           |           |
|------------------|------------------|----------------|-------------------------|-----------|-----------|
|                  |                  |                | X                       | Y         | Z         |
| 1                | 6                | 0              | 1.958948                | 1.131846  | 0.407702  |
| 2                | 6                | 0              | 0.584290                | 1.284235  | 0.382806  |
| 3                | 6                | 0              | -0.268481               | 0.242220  | -0.048051 |
| 4                | 6                | 0              | 0.336202                | -0.971641 | -0.446599 |
| 5                | 6                | 0              | 1.707814                | -1.144039 | -0.413434 |
| 6                | 6                | 0              | 2.516967                | -0.086453 | 0.011040  |
| 7                | 1                | 0              | 2.593946                | 1.936433  | 0.752580  |
| 8                | 1                | 0              | 0.164048                | 2.217873  | 0.734753  |
| 9                | 1                | 0              | -0.275252               | -1.785046 | -0.817169 |
| 10               | 1                | 0              | 2.152523                | -2.076513 | -0.733400 |
| 11               | 6                | 0              | -1.726547               | 0.420933  | -0.082590 |
| 12               | 6                | 0              | -2.568510               | -0.676823 | 0.159971  |
| 13               | 1                | 0              | -2.131580               | -1.638136 | 0.413404  |
| 14               | 6                | 0              | -2.282710               | 1.706081  | -0.378579 |
| 15               | 1                | 0              | -1.566249               | 2.511705  | -0.601241 |
| 16               | 1                | 0              | -4.318964               | 0.243126  | -0.087306 |
| 17               | 7                | 0              | -3.886482               | -0.652600 | 0.138441  |
| 18               | 6                | 0              | -4.740505               | -1.793205 | 0.437796  |
| 19               | 1                | 0              | -5.376639               | -2.018146 | -0.421608 |
| 20               | 1                | 0              | -4.124997               | -2.662985 | 0.666545  |
| 21               | 1                | 0              | -5.378442               | -1.568044 | 1.295934  |
| 22               | 8                | 0              | -3.502195               | 1.968234  | -0.434384 |
| 23               | 7                | 0              | 3.952907                | -0.256280 | 0.040500  |
| 24               | 8                | 0              | 4.659703                | 0.701348  | 0.373236  |
| 25               | 8                | 0              | 4.428969                | -1.354211 | -0.268284 |

### Structure 33b (vacuum)

Energy (Hartrees): -722.353863520

No imaginary frequencies

Standard orientation:

| Center<br>Number | Atomic<br>Number | Atomic<br>Type | Coordinates (Angstroms) |           |           |
|------------------|------------------|----------------|-------------------------|-----------|-----------|
|                  |                  |                | X                       | Y         | Z         |
| 1                | 6                | 0              | -1.756731               | -1.075428 | 0.668351  |
| 2                | 6                | 0              | -0.384447               | -1.278085 | 0.624134  |
| 3                | 6                | 0              | 0.461751                | -0.417840 | -0.102189 |
| 4                | 6                | 0              | -0.132389               | 0.656433  | -0.794380 |
| 5                | 6                | 0              | -1.502017               | 0.878034  | -0.751532 |
| 6                | 6                | 0              | -2.301011               | 0.008032  | -0.015490 |
| 7                | 1                | 0              | -2.405704               | -1.730965 | 1.232831  |
| 8                | 1                | 0              | 0.043196                | -2.103581 | 1.180319  |
| 9                | 1                | 0              | 0.482792                | 1.300678  | -1.412296 |
| 10               | 1                | 0              | -1.959860               | 1.696332  | -1.290367 |
| 11               | 6                | 0              | 1.915680                | -0.656351 | -0.148258 |
| 12               | 6                | 0              | 2.866894                | 0.319528  | 0.022591  |
| 13               | 1                | 0              | 3.901947                | -0.006874 | -0.036801 |
| 14               | 6                | 0              | 2.420188                | -2.016393 | -0.366243 |
| 15               | 1                | 0              | 1.631498                | -2.780680 | -0.517986 |
| 16               | 1                | 0              | 1.745925                | 1.959674  | 0.418475  |
| 17               | 7                | 0              | 2.689294                | 1.627041  | 0.274245  |
| 18               | 6                | 0              | 3.772426                | 2.540864  | 0.609807  |
| 19               | 1                | 0              | 3.839289                | 2.711416  | 1.689386  |
| 20               | 1                | 0              | 4.716577                | 2.118568  | 0.265787  |
| 21               | 1                | 0              | 3.623482                | 3.500679  | 0.110676  |
| 22               | 8                | 0              | 3.594978                | -2.343046 | -0.407487 |
| 23               | 7                | 0              | -3.754601               | 0.238782  | 0.038282  |
| 24               | 8                | 0              | -4.436232               | -0.558207 | 0.673065  |
| 25               | 8                | 0              | -4.199251               | 1.216407  | -0.554134 |

### Structure 33b (CHCl<sub>3</sub>)

Energy (Hartrees): -722.377614472

No imaginary frequencies

Standard orientation:

| Center<br>Number | Atomic<br>Number | Atomic<br>Type | Coordinates (Angstroms) |           |           |
|------------------|------------------|----------------|-------------------------|-----------|-----------|
|                  |                  |                | X                       | Y         | Z         |
| 1                | 6                | 0              | -1.771599               | -1.094510 | 0.631627  |
| 2                | 6                | 0              | -0.401024               | -1.298793 | 0.593714  |
| 3                | 6                | 0              | 0.457747                | -0.410627 | -0.087069 |
| 4                | 6                | 0              | -0.125755               | 0.699982  | -0.732358 |
| 5                | 6                | 0              | -1.493229               | 0.923583  | -0.695492 |
| 6                | 6                | 0              | -2.307028               | 0.021266  | -0.011103 |
| 7                | 1                | 0              | -2.420176               | -1.777278 | 1.163380  |
| 8                | 1                | 0              | 0.015513                | -2.149410 | 1.119576  |
| 9                | 1                | 0              | 0.493978                | 1.376484  | -1.308980 |
| 10               | 1                | 0              | -1.931973               | 1.770907  | -1.204528 |
| 11               | 6                | 0              | 1.907928                | -0.662949 | -0.136616 |
| 12               | 6                | 0              | 2.881145                | 0.308097  | 0.038005  |
| 13               | 1                | 0              | 3.912515                | -0.023552 | -0.042351 |
| 14               | 6                | 0              | 2.381803                | -2.017081 | -0.367564 |
| 15               | 1                | 0              | 1.582499                | -2.762525 | -0.539533 |
| 16               | 1                | 0              | 1.793009                | 1.962717  | 0.457166  |
| 17               | 7                | 0              | 2.727808                | 1.595609  | 0.331658  |
| 18               | 6                | 0              | 3.826402                | 2.531113  | 0.534842  |
| 19               | 1                | 0              | 3.758670                | 2.983884  | 1.527079  |
| 20               | 1                | 0              | 4.773090                | 1.997777  | 0.454139  |
| 21               | 1                | 0              | 3.800618                | 3.323692  | -0.217988 |
| 22               | 8                | 0              | 3.556249                | -2.382828 | -0.409812 |
| 23               | 7                | 0              | -3.749666               | 0.249138  | 0.029810  |
| 24               | 8                | 0              | -4.455247               | -0.577912 | 0.605915  |
| 25               | 8                | 0              | -4.196386               | 1.258688  | -0.514372 |

## Structure 33b (DMSO)

Energy (Hartrees): -722.379276549

No imaginary frequencies

Standard orientation:

| Center<br>Number | Atomic<br>Number | Atomic<br>Type | Coordinates (Angstroms) |           |           |
|------------------|------------------|----------------|-------------------------|-----------|-----------|
|                  |                  |                | X                       | Y         | Z         |
| 1                | 6                | 0              | -1.778835               | -1.104389 | 0.609691  |
| 2                | 6                | 0              | -0.408895               | -1.308891 | 0.574727  |
| 3                | 6                | 0              | 0.455951                | -0.405359 | -0.080037 |
| 4                | 6                | 0              | -0.123481               | 0.721937  | -0.700990 |
| 5                | 6                | 0              | -1.490504               | 0.944623  | -0.667713 |
| 6                | 6                | 0              | -2.310869               | 0.026852  | -0.010377 |
| 7                | 1                | 0              | -2.427761               | -1.800466 | 1.123401  |
| 8                | 1                | 0              | 0.002198                | -2.172190 | 1.083882  |
| 9                | 1                | 0              | 0.497848                | 1.417939  | -1.251626 |
| 10               | 1                | 0              | -1.921211               | 1.806562  | -1.158643 |
| 11               | 6                | 0              | 1.903928                | -0.663392 | -0.129410 |
| 12               | 6                | 0              | 2.887689                | 0.303630  | 0.040259  |
| 13               | 1                | 0              | 3.916038                | -0.034113 | -0.051251 |
| 14               | 6                | 0              | 2.364618                | -2.018770 | -0.365189 |
| 15               | 1                | 0              | 1.556879                | -2.753044 | -0.544238 |
| 16               | 1                | 0              | 1.820176                | 1.967841  | 0.475902  |
| 17               | 7                | 0              | 2.748738                | 1.587002  | 0.340048  |
| 18               | 6                | 0              | 3.856125                | 2.518858  | 0.510040  |
| 19               | 1                | 0              | 3.794523                | 2.996286  | 1.490634  |
| 20               | 1                | 0              | 4.798565                | 1.977512  | 0.434146  |
| 21               | 1                | 0              | 3.824301                | 3.292991  | -0.261335 |
| 22               | 8                | 0              | 3.535484                | -2.401827 | -0.408298 |
| 23               | 7                | 0              | -3.750038               | 0.254400  | 0.027290  |
| 24               | 8                | 0              | -4.462141               | -0.581367 | 0.587519  |
| 25               | 8                | 0              | -4.196695               | 1.273228  | -0.504002 |

## Structure 33b (C<sub>2</sub>H<sub>5</sub>OH)

Energy (Hartrees): -722.381015333

No imaginary frequencies

Standard orientation:

| Center<br>Number | Atomic<br>Number | Atomic<br>Type | Coordinates (Angstroms) |           |           |
|------------------|------------------|----------------|-------------------------|-----------|-----------|
|                  |                  |                | X                       | Y         | Z         |
| 1                | 6                | 0              | -1.771971               | -1.094563 | 0.628903  |
| 2                | 6                | 0              | -0.402908               | -1.299044 | 0.588638  |
| 3                | 6                | 0              | 0.456026                | -0.406100 | -0.087217 |
| 4                | 6                | 0              | -0.125632               | 0.710510  | -0.724649 |
| 5                | 6                | 0              | -1.492257               | 0.932350  | -0.689583 |
| 6                | 6                | 0              | -2.307532               | 0.025179  | -0.010192 |
| 7                | 1                | 0              | -2.416733               | -1.781472 | 1.159856  |
| 8                | 1                | 0              | 0.012579                | -2.153073 | 1.109806  |
| 9                | 1                | 0              | 0.493226                | 1.396354  | -1.290718 |
| 10               | 1                | 0              | -1.925877               | 1.784415  | -1.195065 |
| 11               | 6                | 0              | 1.904982                | -0.663502 | -0.139228 |
| 12               | 6                | 0              | 2.887659                | 0.308154  | 0.036030  |
| 13               | 1                | 0              | 3.918373                | -0.021977 | -0.053849 |
| 14               | 6                | 0              | 2.362095                | -2.011312 | -0.370180 |
| 15               | 1                | 0              | 1.561179                | -2.750477 | -0.544757 |
| 16               | 1                | 0              | 1.806547                | 1.961410  | 0.469053  |
| 17               | 7                | 0              | 2.739053                | 1.586237  | 0.341401  |
| 18               | 6                | 0              | 3.841191                | 2.522278  | 0.531741  |
| 19               | 1                | 0              | 3.766518                | 2.988512  | 1.516671  |
| 20               | 1                | 0              | 4.786856                | 1.986461  | 0.459615  |
| 21               | 1                | 0              | 3.812011                | 3.303907  | -0.231814 |
| 22               | 8                | 0              | 3.540798                | -2.397190 | -0.413325 |
| 23               | 7                | 0              | -3.741698               | 0.250033  | 0.029712  |
| 24               | 8                | 0              | -4.452933               | -0.562386 | 0.626495  |
| 25               | 8                | 0              | -4.201126               | 1.245620  | -0.535942 |

### Structure 33c (vacuum)

Energy (Hartrees): -722.355147894

No imaginary frequencies

Standard orientation:

| Center<br>Number | Atomic<br>Number | Atomic<br>Type | Coordinates (Angstroms) |           |           |
|------------------|------------------|----------------|-------------------------|-----------|-----------|
|                  |                  |                | X                       | Y         | Z         |
| 1                | 6                | 0              | 1.664440                | 0.977080  | 0.688247  |
| 2                | 6                | 0              | 0.302141                | 1.236620  | 0.630765  |
| 3                | 6                | 0              | -0.562062               | 0.408990  | -0.107961 |
| 4                | 6                | 0              | -0.004621               | -0.672764 | -0.814854 |
| 5                | 6                | 0              | 1.356794                | -0.943972 | -0.766213 |
| 6                | 6                | 0              | 2.175421                | -0.116788 | -0.004929 |
| 7                | 1                | 0              | 2.332507                | 1.605919  | 1.260564  |
| 8                | 1                | 0              | -0.099889               | 2.092695  | 1.154103  |
| 9                | 1                | 0              | -0.637580               | -1.286323 | -1.445945 |
| 10               | 1                | 0              | 1.790314                | -1.768613 | -1.315099 |
| 11               | 6                | 0              | -2.013451               | 0.683177  | -0.156733 |
| 12               | 6                | 0              | -2.978379               | -0.280506 | -0.008309 |
| 13               | 1                | 0              | -4.016782               | 0.037202  | -0.068264 |
| 14               | 6                | 0              | -2.515836               | 2.044233  | -0.329367 |
| 15               | 1                | 0              | -3.625432               | 2.104286  | -0.390241 |
| 16               | 1                | 0              | -1.881085               | -1.935500 | 0.384492  |
| 17               | 7                | 0              | -2.819508               | -1.599828 | 0.217532  |
| 18               | 6                | 0              | -3.914770               | -2.485315 | 0.587722  |
| 19               | 1                | 0              | -4.058117               | -2.534113 | 1.672913  |
| 20               | 1                | 0              | -4.838835               | -2.129953 | 0.129774  |
| 21               | 1                | 0              | -3.717371               | -3.491554 | 0.214575  |
| 22               | 8                | 0              | -1.847917               | 3.058432  | -0.406389 |
| 23               | 7                | 0              | 3.620478                | -0.402927 | 0.060858  |
| 24               | 8                | 0              | 4.036269                | -1.382527 | -0.549080 |
| 25               | 8                | 0              | 4.322575                | 0.351683  | 0.723495  |

### Structure 33c (CHCl<sub>3</sub>)

Energy (Hartrees): -722.379549702

No imaginary frequencies

Standard orientation:

| Center<br>Number | Atomic<br>Number | Atomic<br>Type | Coordinates (Angstroms) |           |           |
|------------------|------------------|----------------|-------------------------|-----------|-----------|
|                  |                  |                | X                       | Y         | Z         |
| 1                | 6                | 0              | 1.680869                | 0.970570  | 0.694013  |
| 2                | 6                | 0              | 0.320006                | 1.232106  | 0.646383  |
| 3                | 6                | 0              | -0.556707               | 0.406091  | -0.082908 |
| 4                | 6                | 0              | -0.008869               | -0.687569 | -0.781322 |
| 5                | 6                | 0              | 1.350431                | -0.962665 | -0.743732 |
| 6                | 6                | 0              | 2.183477                | -0.129301 | -0.000436 |
| 7                | 1                | 0              | 2.347878                | 1.603675  | 1.262944  |
| 8                | 1                | 0              | -0.072663               | 2.084709  | 1.183232  |
| 9                | 1                | 0              | -0.647648               | -1.313694 | -1.393225 |
| 10               | 1                | 0              | 1.764873                | -1.797556 | -1.291862 |
| 11               | 6                | 0              | -2.003627               | 0.697874  | -0.127535 |
| 12               | 6                | 0              | -2.992879               | -0.257174 | 0.035488  |
| 13               | 1                | 0              | -4.024443               | 0.078524  | -0.035809 |
| 14               | 6                | 0              | -2.489283               | 2.046197  | -0.328693 |
| 15               | 1                | 0              | -3.595614               | 2.122219  | -0.358422 |
| 16               | 1                | 0              | -1.928201               | -1.936140 | 0.418921  |
| 17               | 7                | 0              | -2.858573               | -1.554518 | 0.307363  |
| 18               | 6                | 0              | -3.969724               | -2.478459 | 0.491976  |
| 19               | 1                | 0              | -3.897557               | -2.967634 | 1.466389  |
| 20               | 1                | 0              | -4.909068               | -1.927937 | 0.444503  |
| 21               | 1                | 0              | -3.969374               | -3.244914 | -0.288118 |
| 22               | 8                | 0              | -1.813337               | 3.061439  | -0.474999 |
| 23               | 7                | 0              | 3.618451                | -0.413520 | 0.047928  |
| 24               | 8                | 0              | 4.037928                | -1.400889 | -0.554583 |
| 25               | 8                | 0              | 4.341722                | 0.345575  | 0.690209  |

### Structure 33c (DMSO)

Energy (Hartrees): -722.381820441

No imaginary frequencies

Standard orientation:

| Center<br>Number | Atomic<br>Number | Atomic<br>Type | Coordinates (Angstroms) |           |           |
|------------------|------------------|----------------|-------------------------|-----------|-----------|
|                  |                  |                | X                       | Y         | Z         |
| 1                | 6                | 0              | 1.685919                | 0.967012  | 0.696956  |
| 2                | 6                | 0              | 0.325441                | 1.227940  | 0.652218  |
| 3                | 6                | 0              | -0.554888               | 0.402335  | -0.074876 |
| 4                | 6                | 0              | -0.009353               | -0.695435 | -0.769427 |
| 5                | 6                | 0              | 1.349541                | -0.970895 | -0.734029 |
| 6                | 6                | 0              | 2.187128                | -0.134653 | 0.002378  |
| 7                | 1                | 0              | 2.351492                | 1.600453  | 1.267343  |
| 8                | 1                | 0              | -0.065612               | 2.077123  | 1.195653  |
| 9                | 1                | 0              | -0.649179               | -1.328953 | -1.372226 |
| 10               | 1                | 0              | 1.757137                | -1.811290 | -1.278931 |
| 11               | 6                | 0              | -1.999104               | 0.701216  | -0.117055 |
| 12               | 6                | 0              | -2.998017               | -0.250613 | 0.043924  |
| 13               | 1                | 0              | -4.026455               | 0.093976  | -0.027819 |
| 14               | 6                | 0              | -2.478383               | 2.047647  | -0.325686 |
| 15               | 1                | 0              | -3.584151               | 2.126716  | -0.343455 |
| 16               | 1                | 0              | -1.948692               | -1.941264 | 0.419250  |
| 17               | 7                | 0              | -2.874162               | -1.544871 | 0.312291  |
| 18               | 6                | 0              | -3.992709               | -2.464645 | 0.474247  |
| 19               | 1                | 0              | -3.925847               | -2.968829 | 1.441064  |
| 20               | 1                | 0              | -4.928263               | -1.907985 | 0.427051  |
| 21               | 1                | 0              | -3.985287               | -3.218795 | -0.317388 |
| 22               | 8                | 0              | -1.801637               | 3.062136  | -0.497167 |
| 23               | 7                | 0              | 3.619669                | -0.416278 | 0.044324  |
| 24               | 8                | 0              | 4.038116                | -1.413141 | -0.546302 |
| 25               | 8                | 0              | 4.350127                | 0.354437  | 0.668627  |



### Structure 33c (C<sub>2</sub>H<sub>5</sub>OH)

Energy (Hartrees): -722.383786909

No imaginary frequencies

Standard orientation:

| Center<br>Number | Atomic<br>Number | Atomic<br>Type | Coordinates (Angstroms) |           |           |
|------------------|------------------|----------------|-------------------------|-----------|-----------|
|                  |                  |                | X                       | Y         | Z         |
| 1                | 6                | 0              | 1.676948                | 0.948427  | 0.728220  |
| 2                | 6                | 0              | 0.316849                | 1.209221  | 0.683197  |
| 3                | 6                | 0              | -0.555999               | 0.406471  | -0.076893 |
| 4                | 6                | 0              | -0.007250               | -0.668322 | -0.803251 |
| 5                | 6                | 0              | 1.351076                | -0.944248 | -0.768387 |
| 6                | 6                | 0              | 2.182034                | -0.130716 | 0.001207  |
| 7                | 1                | 0              | 2.337295                | 1.563144  | 1.324447  |
| 8                | 1                | 0              | -0.078414               | 2.037108  | 1.256714  |
| 9                | 1                | 0              | -0.644625               | -1.281080 | -1.429705 |
| 10               | 1                | 0              | 1.762772                | -1.764803 | -1.339769 |
| 11               | 6                | 0              | -2.002168               | 0.702623  | -0.119352 |
| 12               | 6                | 0              | -2.997290               | -0.256187 | 0.045015  |
| 13               | 1                | 0              | -4.028380               | 0.080479  | -0.023336 |
| 14               | 6                | 0              | -2.484471               | 2.038229  | -0.328806 |
| 15               | 1                | 0              | -3.586746               | 2.125034  | -0.342785 |
| 16               | 1                | 0              | -1.928456               | -1.934116 | 0.410016  |
| 17               | 7                | 0              | -2.859247               | -1.546246 | 0.314255  |
| 18               | 6                | 0              | -3.969546               | -2.475986 | 0.486460  |
| 19               | 1                | 0              | -3.886035               | -2.982604 | 1.450504  |
| 20               | 1                | 0              | -4.909629               | -1.926331 | 0.452973  |
| 21               | 1                | 0              | -3.965497               | -3.227424 | -0.307563 |
| 22               | 8                | 0              | -1.802501               | 3.057952  | -0.507382 |
| 23               | 7                | 0              | 3.609861                | -0.412038 | 0.044931  |
| 24               | 8                | 0              | 4.038153                | -1.394488 | -0.564125 |
| 25               | 8                | 0              | 4.340889                | 0.341724  | 0.690225  |

### Structure 33d (vacuum)

Energy (Hartrees): -722.348730156

No imaginary frequencies

Standard orientation:

| Center<br>Number | Atomic<br>Number | Atomic<br>Type | Coordinates (Angstroms) |           |           |
|------------------|------------------|----------------|-------------------------|-----------|-----------|
|                  |                  |                | X                       | Y         | Z         |
| 1                | 6                | 0              | 1.849751                | 1.012687  | 0.520733  |
| 2                | 6                | 0              | 0.478784                | 1.216823  | 0.466350  |
| 3                | 6                | 0              | -0.379602               | 0.244056  | -0.080386 |
| 4                | 6                | 0              | 0.199544                | -0.928467 | -0.601198 |
| 5                | 6                | 0              | 1.568497                | -1.149258 | -0.546141 |
| 6                | 6                | 0              | 2.381364                | -0.173318 | 0.020895  |
| 7                | 1                | 0              | 2.509803                | 1.754597  | 0.948602  |
| 8                | 1                | 0              | 0.066074                | 2.139265  | 0.848057  |
| 9                | 1                | 0              | -0.426980               | -1.668228 | -1.085803 |
| 10               | 1                | 0              | 2.012926                | -2.048916 | -0.948927 |
| 11               | 6                | 0              | -1.846415               | 0.436307  | -0.102235 |
| 12               | 6                | 0              | -2.663172               | -0.652956 | 0.111566  |
| 13               | 1                | 0              | -2.195349               | -1.591663 | 0.396781  |
| 14               | 6                | 0              | -2.427488               | 1.756854  | -0.312668 |
| 15               | 1                | 0              | -3.538205               | 1.796544  | -0.254702 |
| 16               | 1                | 0              | -4.529833               | 0.073834  | -0.255861 |
| 17               | 7                | 0              | -4.005852               | -0.747427 | 0.005645  |
| 18               | 6                | 0              | -4.766940               | -1.860515 | 0.555560  |
| 19               | 1                | 0              | -5.659095               | -2.029938 | -0.049174 |
| 20               | 1                | 0              | -4.157057               | -2.764935 | 0.524441  |
| 21               | 1                | 0              | -5.071638               | -1.682175 | 1.592783  |
| 22               | 8                | 0              | -1.823543               | 2.792902  | -0.524766 |
| 23               | 7                | 0              | 3.835298                | -0.395552 | 0.080584  |
| 24               | 8                | 0              | 4.271896                | -1.450239 | -0.370067 |
| 25               | 8                | 0              | 4.528808                | 0.483485  | 0.580500  |

### Structure 33d (CHCl<sub>3</sub>)

Energy (Hartrees): -722.374236952

No imaginary frequencies

Standard orientation:

| Center<br>Number | Atomic<br>Number | Atomic<br>Type | Coordinates (Angstroms) |           |           |
|------------------|------------------|----------------|-------------------------|-----------|-----------|
|                  |                  |                | X                       | Y         | Z         |
| 1                | 6                | 0              | 1.867076                | 1.036486  | 0.465751  |
| 2                | 6                | 0              | 0.497809                | 1.242050  | 0.426424  |
| 3                | 6                | 0              | -0.381224               | 0.246504  | -0.051920 |
| 4                | 6                | 0              | 0.188122                | -0.959880 | -0.513151 |
| 5                | 6                | 0              | 1.554716                | -1.183322 | -0.470800 |
| 6                | 6                | 0              | 2.387979                | -0.179119 | 0.020484  |
| 7                | 1                | 0              | 2.529588                | 1.802791  | 0.844402  |
| 8                | 1                | 0              | 0.099696                | 2.183220  | 0.776193  |
| 9                | 1                | 0              | -0.445932               | -1.727975 | -0.939011 |
| 10               | 1                | 0              | 1.977657                | -2.110760 | -0.832138 |
| 11               | 6                | 0              | -1.841492               | 0.450536  | -0.067648 |
| 12               | 6                | 0              | -2.672319               | -0.648587 | 0.136665  |
| 13               | 1                | 0              | -2.214040               | -1.586742 | 0.436927  |
| 14               | 6                | 0              | -2.422946               | 1.761398  | -0.260669 |
| 15               | 1                | 0              | -3.525648               | 1.805407  | -0.161970 |
| 16               | 1                | 0              | -4.517146               | 0.082441  | -0.294664 |
| 17               | 7                | 0              | -3.997582               | -0.727418 | 0.016446  |
| 18               | 6                | 0              | -4.788233               | -1.873095 | 0.448517  |
| 19               | 1                | 0              | -5.547124               | -2.100753 | -0.302185 |
| 20               | 1                | 0              | -4.137131               | -2.739608 | 0.566463  |
| 21               | 1                | 0              | -5.284367               | -1.672507 | 1.403054  |
| 22               | 8                | 0              | -1.825698               | 2.807044  | -0.505917 |
| 23               | 7                | 0              | 3.828847                | -0.400794 | 0.059250  |
| 24               | 8                | 0              | 4.262746                | -1.494646 | -0.305084 |
| 25               | 8                | 0              | 4.551536                | 0.513120  | 0.457393  |

## Structure 33d (DMSO)

Energy (Hartrees): -722.377051276

No imaginary frequencies

Standard orientation:

| Center<br>Number | Atomic<br>Number | Atomic<br>Type | Coordinates (Angstroms) |           |           |
|------------------|------------------|----------------|-------------------------|-----------|-----------|
|                  |                  |                | X                       | Y         | Z         |
| 1                | 6                | 0              | 1.869960                | 1.042619  | 0.448000  |
| 2                | 6                | 0              | 0.501635                | 1.249712  | 0.411201  |
| 3                | 6                | 0              | -0.384417               | 0.248534  | -0.047318 |
| 4                | 6                | 0              | 0.182711                | -0.969125 | -0.486971 |
| 5                | 6                | 0              | 1.548506                | -1.192655 | -0.448569 |
| 6                | 6                | 0              | 2.388820                | -0.181288 | 0.019598  |
| 7                | 1                | 0              | 2.532719                | 1.814246  | 0.815551  |
| 8                | 1                | 0              | 0.107316                | 2.195496  | 0.752510  |
| 9                | 1                | 0              | -0.452959               | -1.748077 | -0.889767 |
| 10               | 1                | 0              | 1.963889                | -2.129098 | -0.795212 |
| 11               | 6                | 0              | -1.840694               | 0.458297  | -0.060825 |
| 12               | 6                | 0              | -2.674315               | -0.646964 | 0.138515  |
| 13               | 1                | 0              | -2.213242               | -1.589170 | 0.419345  |
| 14               | 6                | 0              | -2.421936               | 1.767540  | -0.248808 |
| 15               | 1                | 0              | -3.523274               | 1.810048  | -0.149610 |
| 16               | 1                | 0              | -4.522296               | 0.095149  | -0.249842 |
| 17               | 7                | 0              | -3.995273               | -0.718731 | 0.040895  |
| 18               | 6                | 0              | -4.780703               | -1.890052 | 0.410128  |
| 19               | 1                | 0              | -5.464309               | -2.147007 | -0.401584 |
| 20               | 1                | 0              | -4.112072               | -2.730308 | 0.595815  |
| 21               | 1                | 0              | -5.364185               | -1.692487 | 1.313669  |
| 22               | 8                | 0              | -1.826212               | 2.816441  | -0.499170 |
| 23               | 7                | 0              | 3.825258                | -0.402627 | 0.054141  |
| 24               | 8                | 0              | 4.260158                | -1.503768 | -0.294115 |
| 25               | 8                | 0              | 4.553694                | 0.518702  | 0.432556  |

## Structure 33d (C<sub>2</sub>H<sub>5</sub>OH)

Energy (Hartrees): -722.378724649

No imaginary frequencies

Standard orientation:

| Center<br>Number | Atomic<br>Number | Atomic<br>Type | Coordinates (Angstroms) |           |           |
|------------------|------------------|----------------|-------------------------|-----------|-----------|
|                  |                  |                | X                       | Y         | Z         |
| 1                | 6                | 0              | 1.868393                | 1.037448  | 0.469786  |
| 2                | 6                | 0              | 0.500944                | 1.245211  | 0.434526  |
| 3                | 6                | 0              | -0.383025               | 0.253187  | -0.046518 |
| 4                | 6                | 0              | 0.182094                | -0.956650 | -0.508475 |
| 5                | 6                | 0              | 1.546796                | -1.182498 | -0.471699 |
| 6                | 6                | 0              | 2.386109                | -0.179424 | 0.018026  |
| 7                | 1                | 0              | 2.529521                | 1.800352  | 0.857820  |
| 8                | 1                | 0              | 0.106893                | 2.181001  | 0.803303  |
| 9                | 1                | 0              | -0.455061               | -1.725705 | -0.927707 |
| 10               | 1                | 0              | 1.961621                | -2.112125 | -0.836846 |
| 11               | 6                | 0              | -1.839634               | 0.461865  | -0.058648 |
| 12               | 6                | 0              | -2.672789               | -0.646015 | 0.147759  |
| 13               | 1                | 0              | -2.209824               | -1.582293 | 0.444875  |
| 14               | 6                | 0              | -2.419591               | 1.762562  | -0.252728 |
| 15               | 1                | 0              | -3.517423               | 1.815352  | -0.146498 |
| 16               | 1                | 0              | -4.516660               | 0.086569  | -0.269309 |
| 17               | 7                | 0              | -3.990231               | -0.721968 | 0.038335  |
| 18               | 6                | 0              | -4.777677               | -1.889392 | 0.419338  |
| 19               | 1                | 0              | -5.460649               | -2.152637 | -0.390614 |
| 20               | 1                | 0              | -4.110952               | -2.728840 | 0.614490  |
| 21               | 1                | 0              | -5.361604               | -1.680330 | 1.319853  |
| 22               | 8                | 0              | -1.818937               | 2.812742  | -0.519060 |
| 23               | 7                | 0              | 3.816005                | -0.404129 | 0.054358  |
| 24               | 8                | 0              | 4.252957                | -1.508011 | -0.287407 |
| 25               | 8                | 0              | 4.553979                | 0.513216  | 0.428165  |

### Structure 33e (vacuum)

Energy (Hartrees): -722.344809443

No imaginary frequencies

Standard orientation:

| Center<br>Number | Atomic<br>Number | Atomic<br>Type | Coordinates (Angstroms) |           |           |
|------------------|------------------|----------------|-------------------------|-----------|-----------|
|                  |                  |                | X                       | Y         | Z         |
| 1                | 6                | 0              | -1.797120               | 1.050064  | -0.487705 |
| 2                | 6                | 0              | -0.412689               | 1.138150  | -0.477839 |
| 3                | 6                | 0              | 0.379036                | 0.075654  | -0.005189 |
| 4                | 6                | 0              | -0.275749               | -1.067201 | 0.487394  |
| 5                | 6                | 0              | -1.660406               | -1.172610 | 0.479047  |
| 6                | 6                | 0              | -2.407352               | -0.108500 | -0.013546 |
| 7                | 1                | 0              | -2.408018               | 1.860779  | -0.860068 |
| 8                | 1                | 0              | 0.061760                | 2.039224  | -0.838580 |
| 9                | 1                | 0              | 0.306462                | -1.877230 | 0.911426  |
| 10               | 1                | 0              | -2.163716               | -2.049959 | 0.861173  |
| 11               | 6                | 0              | 1.863903                | 0.145712  | -0.029643 |
| 12               | 6                | 0              | 2.535508                | -0.986717 | -0.436787 |
| 13               | 1                | 0              | 1.914170                | -1.795845 | -0.809751 |
| 14               | 6                | 0              | 2.523109                | 1.400640  | 0.332077  |
| 15               | 1                | 0              | 3.622129                | 1.411717  | 0.248287  |
| 16               | 1                | 0              | 4.042259                | -2.214360 | -0.902208 |
| 17               | 7                | 0              | 3.845197                | -1.325453 | -0.473613 |
| 18               | 6                | 0              | 4.997465                | -0.600999 | 0.037633  |
| 19               | 1                | 0              | 5.848959                | -1.281813 | 0.054946  |
| 20               | 1                | 0              | 5.256781                | 0.258974  | -0.587158 |
| 21               | 1                | 0              | 4.811933                | -0.253606 | 1.057083  |
| 22               | 8                | 0              | 1.952601                | 2.417366  | 0.690853  |
| 23               | 7                | 0              | -3.877065               | -0.207419 | -0.024777 |
| 24               | 8                | 0              | -4.511467               | 0.747287  | -0.459706 |
| 25               | 8                | 0              | -4.384119               | -1.241270 | 0.398969  |

### Structure 33e (CHCl<sub>3</sub>)

Energy (Hartrees): -722.370307612

No imaginary frequencies

Standard orientation:

| Center<br>Number | Atomic<br>Number | Atomic<br>Type | Coordinates (Angstroms) |           |           |
|------------------|------------------|----------------|-------------------------|-----------|-----------|
|                  |                  |                | X                       | Y         | Z         |
| 1                | 6                | 0              | -1.809607               | 1.077335  | -0.427492 |
| 2                | 6                | 0              | -0.427178               | 1.168543  | -0.436852 |
| 3                | 6                | 0              | 0.381556                | 0.084753  | -0.036693 |
| 4                | 6                | 0              | -0.265736               | -1.090028 | 0.397384  |
| 5                | 6                | 0              | -1.648046               | -1.199328 | 0.406909  |
| 6                | 6                | 0              | -2.411220               | -0.109490 | -0.006771 |
| 7                | 1                | 0              | -2.420922               | 1.908825  | -0.750570 |
| 8                | 1                | 0              | 0.034563                | 2.086978  | -0.769232 |
| 9                | 1                | 0              | 0.321483                | -1.925663 | 0.759101  |
| 10               | 1                | 0              | -2.131724               | -2.104411 | 0.747859  |
| 11               | 6                | 0              | 1.859965                | 0.161620  | -0.079792 |
| 12               | 6                | 0              | 2.540322                | -0.986720 | -0.471194 |
| 13               | 1                | 0              | 1.932438                | -1.789673 | -0.877659 |
| 14               | 6                | 0              | 2.536399                | 1.407296  | 0.230338  |
| 15               | 1                | 0              | 3.622106                | 1.419296  | 0.054289  |
| 16               | 1                | 0              | 4.053110                | -2.213894 | -0.865061 |
| 17               | 7                | 0              | 3.835227                | -1.323084 | -0.442907 |
| 18               | 6                | 0              | 4.958064                | -0.633410 | 0.177477  |
| 19               | 1                | 0              | 5.757707                | -1.358900 | 0.328087  |
| 20               | 1                | 0              | 5.340238                | 0.177876  | -0.447764 |
| 21               | 1                | 0              | 4.663269                | -0.227921 | 1.147956  |
| 22               | 8                | 0              | 1.999563                | 2.437861  | 0.634123  |
| 23               | 7                | 0              | -3.868292               | -0.210484 | 0.005285  |
| 24               | 8                | 0              | -4.524889               | 0.770620  | -0.342189 |
| 25               | 8                | 0              | -4.378166               | -1.273601 | 0.360124  |

### Structure 33e (DMSO)

Energy (Hartrees): -722.372936410

No imaginary frequencies

Standard orientation:

| Center<br>Number | Atomic<br>Number | Atomic<br>Type | Coordinates (Angstroms) |           |           |
|------------------|------------------|----------------|-------------------------|-----------|-----------|
|                  |                  |                | X                       | Y         | Z         |
| 1                | 6                | 0              | -1.809993               | 1.082800  | -0.411421 |
| 2                | 6                | 0              | -0.428202               | 1.172593  | -0.420450 |
| 3                | 6                | 0              | 0.382859                | 0.081970  | -0.038524 |
| 4                | 6                | 0              | -0.266932               | -1.100702 | 0.374823  |
| 5                | 6                | 0              | -1.648714               | -1.207237 | 0.386426  |
| 6                | 6                | 0              | -2.413962               | -0.109954 | -0.007447 |
| 7                | 1                | 0              | -2.417962               | 1.921100  | -0.723306 |
| 8                | 1                | 0              | 0.033076                | 2.094929  | -0.742028 |
| 9                | 1                | 0              | 0.317775                | -1.946239 | 0.716579  |
| 10               | 1                | 0              | -2.128866               | -2.119566 | 0.713027  |
| 11               | 6                | 0              | 1.858080                | 0.161451  | -0.080858 |
| 12               | 6                | 0              | 2.542607                | -0.994135 | -0.461584 |
| 13               | 1                | 0              | 1.938726                | -1.802032 | -0.863438 |
| 14               | 6                | 0              | 2.536398                | 1.406577  | 0.214893  |
| 15               | 1                | 0              | 3.619797                | 1.413957  | 0.028636  |
| 16               | 1                | 0              | 4.051503                | -2.224097 | -0.834212 |
| 17               | 7                | 0              | 3.832830                | -1.325413 | -0.426284 |
| 18               | 6                | 0              | 4.957927                | -0.627189 | 0.180946  |
| 19               | 1                | 0              | 5.753018                | -1.354214 | 0.345315  |
| 20               | 1                | 0              | 5.341657                | 0.168376  | -0.463187 |
| 21               | 1                | 0              | 4.663867                | -0.198778 | 1.141604  |
| 22               | 8                | 0              | 2.008086                | 2.443329  | 0.622449  |
| 23               | 7                | 0              | -3.867210               | -0.207971 | 0.007987  |
| 24               | 8                | 0              | -4.525796               | 0.774708  | -0.340030 |
| 25               | 8                | 0              | -4.381332               | -1.270136 | 0.366115  |



### Structure 33e (C<sub>2</sub>H<sub>5</sub>OH)

Energy (Hartrees): -722.374861905

No imaginary frequencies

Standard orientation:

| Center<br>Number | Atomic<br>Number | Atomic<br>Type | Coordinates (Angstroms) |           |           |
|------------------|------------------|----------------|-------------------------|-----------|-----------|
|                  |                  |                | X                       | Y         | Z         |
| 1                | 6                | 0              | -1.809226               | 1.071357  | -0.450451 |
| 2                | 6                | 0              | -0.428141               | 1.162244  | -0.461551 |
| 3                | 6                | 0              | 0.382199                | 0.084212  | -0.045631 |
| 4                | 6                | 0              | -0.263185               | -1.089760 | 0.396182  |
| 5                | 6                | 0              | -1.644237               | -1.199083 | 0.409490  |
| 6                | 6                | 0              | -2.409918               | -0.111623 | -0.012028 |
| 7                | 1                | 0              | -2.417686               | 1.898934  | -0.788899 |
| 8                | 1                | 0              | 0.030861                | 2.073368  | -0.818367 |
| 9                | 1                | 0              | 0.325247                | -1.923889 | 0.759306  |
| 10               | 1                | 0              | -2.122671               | -2.103481 | 0.759873  |
| 11               | 6                | 0              | 1.858401                | 0.165630  | -0.082304 |
| 12               | 6                | 0              | 2.543991                | -0.988207 | -0.474238 |
| 13               | 1                | 0              | 1.939360                | -1.789086 | -0.889011 |
| 14               | 6                | 0              | 2.530172                | 1.399154  | 0.237549  |
| 15               | 1                | 0              | 3.613188                | 1.420836  | 0.063094  |
| 16               | 1                | 0              | 4.052244                | -2.214961 | -0.852870 |
| 17               | 7                | 0              | 3.831556                | -1.320579 | -0.436075 |
| 18               | 6                | 0              | 4.955537                | -0.621069 | 0.173296  |
| 19               | 1                | 0              | 5.756387                | -1.344150 | 0.325756  |
| 20               | 1                | 0              | 5.330121                | 0.183158  | -0.465037 |
| 21               | 1                | 0              | 4.663664                | -0.206093 | 1.140413  |
| 22               | 8                | 0              | 1.990344                | 2.431415  | 0.662578  |
| 23               | 7                | 0              | -3.857911               | -0.209029 | 0.010150  |
| 24               | 8                | 0              | -4.523179               | 0.770900  | -0.336467 |
| 25               | 8                | 0              | -4.377139               | -1.267878 | 0.374555  |

### Structure 33f (vacuum)

Energy (Hartrees): -722.346877316

No imaginary frequencies

Standard orientation:

| Center<br>Number | Atomic<br>Number | Atomic<br>Type | Coordinates (Angstroms) |           |           |
|------------------|------------------|----------------|-------------------------|-----------|-----------|
|                  |                  |                | X                       | Y         | Z         |
| 1                | 6                | 0              | -1.883033               | 1.174826  | -0.256749 |
| 2                | 6                | 0              | -0.497378               | 1.234744  | -0.273616 |
| 3                | 6                | 0              | 0.291871                | 0.096633  | -0.009978 |
| 4                | 6                | 0              | -0.377891               | -1.109354 | 0.277056  |
| 5                | 6                | 0              | -1.762938               | -1.190203 | 0.277512  |
| 6                | 6                | 0              | -2.503599               | -0.041918 | 0.013843  |
| 7                | 1                | 0              | -2.486839               | 2.046654  | -0.468104 |
| 8                | 1                | 0              | -0.020399               | 2.173180  | -0.528193 |
| 9                | 1                | 0              | 0.197224                | -1.990661 | 0.535494  |
| 10               | 1                | 0              | -2.274780               | -2.116495 | 0.499770  |
| 11               | 6                | 0              | 1.768220                | 0.167684  | -0.037419 |
| 12               | 6                | 0              | 2.454994                | -0.903943 | -0.578944 |
| 13               | 1                | 0              | 1.868224                | -1.630825 | -1.135728 |
| 14               | 6                | 0              | 2.393453                | 1.413594  | 0.401719  |
| 15               | 1                | 0              | 1.729064                | 2.065735  | 1.001899  |
| 16               | 1                | 0              | 4.022492                | -2.029545 | -1.078129 |
| 17               | 7                | 0              | 3.756420                | -1.232060 | -0.523426 |
| 18               | 6                | 0              | 4.771283                | -0.727169 | 0.394836  |
| 19               | 1                | 0              | 5.615980                | -1.415963 | 0.372911  |
| 20               | 1                | 0              | 5.089746                | 0.279766  | 0.126862  |
| 21               | 1                | 0              | 4.366181                | -0.694582 | 1.409931  |
| 22               | 8                | 0              | 3.524109                | 1.795800  | 0.134836  |
| 23               | 7                | 0              | -3.973361               | -0.115468 | 0.023750  |
| 24               | 8                | 0              | -4.598931               | 0.914804  | -0.202660 |
| 25               | 8                | 0              | -4.489954               | -1.203595 | 0.256758  |

### Structure 33f (CHCl<sub>3</sub>)

Energy (Hartrees): -722.369711796

No imaginary frequencies

Standard orientation:

| Center<br>Number | Atomic<br>Number | Atomic<br>Type | Coordinates (Angstroms) |           |           |
|------------------|------------------|----------------|-------------------------|-----------|-----------|
|                  |                  |                | X                       | Y         | Z         |
| 1                | 6                | 0              | -1.882529               | 1.185464  | -0.215329 |
| 2                | 6                | 0              | -0.499188               | 1.247417  | -0.241679 |
| 3                | 6                | 0              | 0.296752                | 0.100604  | -0.023967 |
| 4                | 6                | 0              | -0.372195               | -1.118901 | 0.219296  |
| 5                | 6                | 0              | -1.755084               | -1.201011 | 0.228224  |
| 6                | 6                | 0              | -2.502878               | -0.042794 | 0.016137  |
| 7                | 1                | 0              | -2.479844               | 2.069141  | -0.393770 |
| 8                | 1                | 0              | -0.028412               | 2.195637  | -0.469102 |
| 9                | 1                | 0              | 0.201994                | -2.012290 | 0.432890  |
| 10               | 1                | 0              | -2.254330               | -2.141104 | 0.419289  |
| 11               | 6                | 0              | 1.768274                | 0.174602  | -0.054824 |
| 12               | 6                | 0              | 2.463621                | -0.916701 | -0.571656 |
| 13               | 1                | 0              | 1.894623                | -1.644489 | -1.144281 |
| 14               | 6                | 0              | 2.391704                | 1.425406  | 0.342642  |
| 15               | 1                | 0              | 1.740185                | 2.093588  | 0.935820  |
| 16               | 1                | 0              | 4.033975                | -2.055985 | -1.001019 |
| 17               | 7                | 0              | 3.749952                | -1.248341 | -0.464679 |
| 18               | 6                | 0              | 4.741602                | -0.728752 | 0.467781  |
| 19               | 1                | 0              | 5.545743                | -1.460984 | 0.539753  |
| 20               | 1                | 0              | 5.136907                | 0.234268  | 0.143901  |
| 21               | 1                | 0              | 4.288238                | -0.597441 | 1.453308  |
| 22               | 8                | 0              | 3.523999                | 1.808267  | 0.050921  |
| 23               | 7                | 0              | -3.959679               | -0.116793 | 0.035272  |
| 24               | 8                | 0              | -4.599915               | 0.922961  | -0.122594 |
| 25               | 8                | 0              | -4.488018               | -1.215780 | 0.207837  |

## Structure 33f (DMSO)

Energy (Hartrees): -722.371131491

No imaginary frequencies

Standard orientation:

| Center<br>Number | Atomic<br>Number | Atomic<br>Type | Coordinates (Angstroms) |           |           |
|------------------|------------------|----------------|-------------------------|-----------|-----------|
|                  |                  |                | X                       | Y         | Z         |
| 1                | 6                | 0              | -1.881374               | 1.192025  | -0.184065 |
| 2                | 6                | 0              | -0.499053               | 1.256256  | -0.215482 |
| 3                | 6                | 0              | 0.300830                | 0.104045  | -0.033539 |
| 4                | 6                | 0              | -0.367945               | -1.123446 | 0.177500  |
| 5                | 6                | 0              | -1.749828               | -1.206278 | 0.190747  |
| 6                | 6                | 0              | -2.501857               | -0.042880 | 0.016314  |
| 7                | 1                | 0              | -2.477086               | 2.081835  | -0.335207 |
| 8                | 1                | 0              | -0.033068               | 2.212102  | -0.419250 |
| 9                | 1                | 0              | 0.205250                | -2.024027 | 0.361149  |
| 10               | 1                | 0              | -2.243238               | -2.154239 | 0.357115  |
| 11               | 6                | 0              | 1.769347                | 0.178290  | -0.067457 |
| 12               | 6                | 0              | 2.465983                | -0.924744 | -0.568303 |
| 13               | 1                | 0              | 1.904297                | -1.655109 | -1.144221 |
| 14               | 6                | 0              | 2.395953                | 1.431454  | 0.311489  |
| 15               | 1                | 0              | 1.752409                | 2.103843  | 0.908126  |
| 16               | 1                | 0              | 4.033945                | -2.080084 | -0.948177 |
| 17               | 7                | 0              | 3.745087                | -1.258302 | -0.434200 |
| 18               | 6                | 0              | 4.718534                | -0.730515 | 0.511337  |
| 19               | 1                | 0              | 5.512492                | -1.469246 | 0.617387  |
| 20               | 1                | 0              | 5.132608                | 0.221203  | 0.176587  |
| 21               | 1                | 0              | 4.241055                | -0.572253 | 1.481611  |
| 22               | 8                | 0              | 3.524906                | 1.815301  | 0.002410  |
| 23               | 7                | 0              | -3.954069               | -0.117558 | 0.042206  |
| 24               | 8                | 0              | -4.599159               | 0.924578  | -0.099672 |
| 25               | 8                | 0              | -4.484413               | -1.219660 | 0.204461  |

### Structure 33f (C<sub>2</sub>H<sub>5</sub>OH)

Energy (Hartrees): -722.372927941

No imaginary frequencies

Standard orientation:

| Center<br>Number | Atomic<br>Number | Atomic<br>Type | Coordinates (Angstroms) |           |           |
|------------------|------------------|----------------|-------------------------|-----------|-----------|
|                  |                  |                | X                       | Y         | Z         |
| 1                | 6                | 0              | -1.886202               | 1.198069  | -0.176783 |
| 2                | 6                | 0              | -0.505391               | 1.268220  | -0.212790 |
| 3                | 6                | 0              | 0.299797                | 0.117736  | -0.040010 |
| 4                | 6                | 0              | -0.362463               | -1.114805 | 0.164996  |
| 5                | 6                | 0              | -1.742831               | -1.204426 | 0.181629  |
| 6                | 6                | 0              | -2.500694               | -0.042157 | 0.017183  |
| 7                | 1                | 0              | -2.484910               | 2.086865  | -0.322141 |
| 8                | 1                | 0              | -0.045268               | 2.227215  | -0.414140 |
| 9                | 1                | 0              | 0.215117                | -2.013755 | 0.343017  |
| 10               | 1                | 0              | -2.230635               | -2.155780 | 0.344982  |
| 11               | 6                | 0              | 1.767219                | 0.193231  | -0.076944 |
| 12               | 6                | 0              | 2.463877                | -0.913736 | -0.580898 |
| 13               | 1                | 0              | 1.907145                | -1.628330 | -1.180928 |
| 14               | 6                | 0              | 2.398930                | 1.438506  | 0.290848  |
| 15               | 1                | 0              | 1.759951                | 2.134962  | 0.859895  |
| 16               | 1                | 0              | 4.028499                | -2.074045 | -0.949998 |
| 17               | 7                | 0              | 3.733585                | -1.260807 | -0.424804 |
| 18               | 6                | 0              | 4.697604                | -0.751896 | 0.542152  |
| 19               | 1                | 0              | 5.424933                | -1.541633 | 0.730385  |
| 20               | 1                | 0              | 5.208478                | 0.139341  | 0.176112  |
| 21               | 1                | 0              | 4.187671                | -0.502041 | 1.474240  |
| 22               | 8                | 0              | 3.546150                | 1.799638  | -0.003920 |
| 23               | 7                | 0              | -3.945399               | -0.123618 | 0.047438  |
| 24               | 8                | 0              | -4.602468               | 0.916359  | -0.067325 |
| 25               | 8                | 0              | -4.477102               | -1.230281 | 0.186725  |

### Structure 33g (vacuum)

Energy (Hartrees): -722.350994599

No imaginary frequencies

Standard orientation:

| Center<br>Number | Atomic<br>Number | Atomic<br>Type | Coordinates (Angstroms) |           |           |
|------------------|------------------|----------------|-------------------------|-----------|-----------|
|                  |                  |                | X                       | Y         | Z         |
| 1                | 6                | 0              | 1.724135                | -1.119031 | -0.456383 |
| 2                | 6                | 0              | 0.346781                | -0.954369 | -0.487454 |
| 3                | 6                | 0              | -0.259592               | 0.238221  | -0.049874 |
| 4                | 6                | 0              | 0.577120                | 1.264118  | 0.428855  |
| 5                | 6                | 0              | 1.956555                | 1.120326  | 0.451503  |
| 6                | 6                | 0              | 2.517137                | -0.075148 | 0.010671  |
| 7                | 1                | 0              | 2.191108                | -2.031469 | -0.800922 |
| 8                | 1                | 0              | -0.264360               | -1.755043 | -0.886373 |
| 9                | 1                | 0              | 0.138775                | 2.176574  | 0.814684  |
| 10               | 1                | 0              | 2.599489                | 1.906655  | 0.822428  |
| 11               | 6                | 0              | -1.725148               | 0.404769  | -0.094777 |
| 12               | 6                | 0              | -2.285310               | 1.611289  | -0.429280 |
| 13               | 1                | 0              | -1.674737               | 2.471421  | -0.687726 |
| 14               | 6                | 0              | -2.602038               | -0.715584 | 0.206081  |
| 15               | 1                | 0              | -2.133992               | -1.660286 | 0.507767  |
| 16               | 7                | 0              | -3.882340               | -0.611172 | 0.155810  |
| 17               | 6                | 0              | -4.710921               | -1.750875 | 0.500374  |
| 18               | 1                | 0              | -5.365100               | -1.489203 | 1.337123  |
| 19               | 1                | 0              | -5.354534               | -2.004657 | -0.346873 |
| 20               | 1                | 0              | -4.120341               | -2.634554 | 0.775402  |
| 21               | 8                | 0              | -3.580709               | 1.840354  | -0.499791 |
| 22               | 1                | 0              | -4.041081               | 0.966071  | -0.264390 |
| 23               | 7                | 0              | 3.979772                | -0.239674 | 0.042088  |
| 24               | 8                | 0              | 4.651411                | 0.699915  | 0.454206  |
| 25               | 8                | 0              | 4.443102                | -1.306754 | -0.346252 |

## Structure 33g (CHCl<sub>3</sub>)

Energy (Hartrees): -722.368275643

No imaginary frequencies

Standard orientation:

| Center<br>Number | Atomic<br>Number | Atomic<br>Type | Coordinates (Angstroms) |           |           |
|------------------|------------------|----------------|-------------------------|-----------|-----------|
|                  |                  |                | X                       | Y         | Z         |
| 1                | 6                | 0              | 1.720038                | -1.142613 | -0.395796 |
| 2                | 6                | 0              | 0.344268                | -0.977837 | -0.421108 |
| 3                | 6                | 0              | -0.258064               | 0.238006  | -0.038975 |
| 4                | 6                | 0              | 0.586755                | 1.285779  | 0.381965  |
| 5                | 6                | 0              | 1.964154                | 1.140685  | 0.399707  |
| 6                | 6                | 0              | 2.521984                | -0.077518 | 0.011244  |
| 7                | 1                | 0              | 2.172423                | -2.076103 | -0.701358 |
| 8                | 1                | 0              | -0.267929               | -1.799901 | -0.770296 |
| 9                | 1                | 0              | 0.158189                | 2.219465  | 0.724866  |
| 10               | 1                | 0              | 2.602609                | 1.949131  | 0.728784  |
| 11               | 6                | 0              | -1.721429               | 0.404572  | -0.081200 |
| 12               | 6                | 0              | -2.281386               | 1.621387  | -0.382182 |
| 13               | 1                | 0              | -1.676888               | 2.492797  | -0.615426 |
| 14               | 6                | 0              | -2.603226               | -0.723437 | 0.186393  |
| 15               | 1                | 0              | -2.148989               | -1.679890 | 0.463187  |
| 16               | 7                | 0              | -3.882671               | -0.603766 | 0.132747  |
| 17               | 6                | 0              | -4.729026               | -1.742407 | 0.439750  |
| 18               | 1                | 0              | -5.392080               | -1.490996 | 1.273097  |
| 19               | 1                | 0              | -5.363758               | -1.968378 | -0.422422 |
| 20               | 1                | 0              | -4.150943               | -2.636970 | 0.701972  |
| 21               | 8                | 0              | -3.580835               | 1.839549  | -0.448109 |
| 22               | 1                | 0              | -4.031937               | 0.942109  | -0.234333 |
| 23               | 7                | 0              | 3.973096                | -0.241488 | 0.033598  |
| 24               | 8                | 0              | 4.663434                | 0.716946  | 0.378690  |
| 25               | 8                | 0              | 4.442642                | -1.330768 | -0.294492 |

## Structure 33g (DMSO)

Energy (Hartrees): -722.367582613

No imaginary frequencies

Standard orientation:

| Center<br>Number | Atomic<br>Number | Atomic<br>Type | Coordinates (Angstroms) |           |           |
|------------------|------------------|----------------|-------------------------|-----------|-----------|
|                  |                  |                | X                       | Y         | Z         |
| 1                | 6                | 0              | 1.719259                | -1.146277 | -0.387203 |
| 2                | 6                | 0              | 0.343615                | -0.982262 | -0.410382 |
| 3                | 6                | 0              | -0.257523               | 0.237790  | -0.038009 |
| 4                | 6                | 0              | 0.588302                | 1.290322  | 0.370627  |
| 5                | 6                | 0              | 1.965144                | 1.144139  | 0.388944  |
| 6                | 6                | 0              | 2.522966                | -0.077996 | 0.010282  |
| 7                | 1                | 0              | 2.167008                | -2.084052 | -0.686310 |
| 8                | 1                | 0              | -0.268235               | -1.809255 | -0.748121 |
| 9                | 1                | 0              | 0.162232                | 2.229247  | 0.701866  |
| 10               | 1                | 0              | 2.601424                | 1.957342  | 0.710240  |
| 11               | 6                | 0              | -1.720109               | 0.403856  | -0.078312 |
| 12               | 6                | 0              | -2.281040               | 1.621285  | -0.378686 |
| 13               | 1                | 0              | -1.677458               | 2.493995  | -0.609351 |
| 14               | 6                | 0              | -2.602207               | -0.724535 | 0.186683  |
| 15               | 1                | 0              | -2.152114               | -1.682786 | 0.460563  |
| 16               | 7                | 0              | -3.881930               | -0.599286 | 0.132701  |
| 17               | 6                | 0              | -4.733186               | -1.736567 | 0.435273  |
| 18               | 1                | 0              | -5.399670               | -1.483727 | 1.265524  |
| 19               | 1                | 0              | -5.364270               | -1.960556 | -0.430228 |
| 20               | 1                | 0              | -4.156930               | -2.631102 | 0.699258  |
| 21               | 8                | 0              | -3.581377               | 1.832911  | -0.446261 |
| 22               | 1                | 0              | -4.024088               | 0.925383  | -0.231430 |
| 23               | 7                | 0              | 3.971367                | -0.241475 | 0.033465  |
| 24               | 8                | 0              | 4.663418                | 0.714283  | 0.389370  |
| 25               | 8                | 0              | 4.444798                | -1.328154 | -0.304419 |



## Structure 33g (C<sub>2</sub>H<sub>5</sub>OH)

Energy (Hartrees): -722.367546364

No imaginary frequencies

Standard orientation:

| Center<br>Number | Atomic<br>Number | Atomic<br>Type | Coordinates (Angstroms) |           |           |
|------------------|------------------|----------------|-------------------------|-----------|-----------|
|                  |                  |                | X                       | Y         | Z         |
| 1                | 6                | 0              | 1.717044                | -1.145530 | -0.391165 |
| 2                | 6                | 0              | 0.342590                | -0.979496 | -0.415442 |
| 3                | 6                | 0              | -0.257490               | 0.240864  | -0.040210 |
| 4                | 6                | 0              | 0.589432                | 1.292774  | 0.369736  |
| 5                | 6                | 0              | 1.965219                | 1.146183  | 0.387362  |
| 6                | 6                | 0              | 2.521939                | -0.077523 | 0.008304  |
| 7                | 1                | 0              | 2.163170                | -2.083419 | -0.692498 |
| 8                | 1                | 0              | -0.269702               | -1.804544 | -0.757035 |
| 9                | 1                | 0              | 0.164498                | 2.230740  | 0.704912  |
| 10               | 1                | 0              | 2.600549                | 1.958772  | 0.712028  |
| 11               | 6                | 0              | -1.719367               | 0.407015  | -0.077078 |
| 12               | 6                | 0              | -2.278187               | 1.626786  | -0.365278 |
| 13               | 1                | 0              | -1.678575               | 2.503171  | -0.590407 |
| 14               | 6                | 0              | -2.600731               | -0.725053 | 0.180971  |
| 15               | 1                | 0              | -2.147873               | -1.682680 | 0.452239  |
| 16               | 7                | 0              | -3.880138               | -0.603558 | 0.125967  |
| 17               | 6                | 0              | -4.725352               | -1.746914 | 0.424380  |
| 18               | 1                | 0              | -5.393246               | -1.500820 | 1.255462  |
| 19               | 1                | 0              | -5.355572               | -1.970316 | -0.441818 |
| 20               | 1                | 0              | -4.145459               | -2.639956 | 0.685060  |
| 21               | 8                | 0              | -3.582623               | 1.839502  | -0.427767 |
| 22               | 1                | 0              | -4.030476               | 0.932782  | -0.221861 |
| 23               | 7                | 0              | 3.963358                | -0.243026 | 0.034111  |
| 24               | 8                | 0              | 4.665744                | 0.722687  | 0.345712  |
| 25               | 8                | 0              | 4.439325                | -1.343723 | -0.257456 |

### Structure 33h (vacuum)

Energy (Hartrees): -722.325993773

No imaginary frequencies

Standard orientation:

| Center<br>Number | Atomic<br>Number | Atomic<br>Type | Coordinates (Angstroms) |           |           |
|------------------|------------------|----------------|-------------------------|-----------|-----------|
|                  |                  |                | X                       | Y         | Z         |
| 1                | 6                | 0              | 1.658862                | -1.093692 | -0.486935 |
| 2                | 6                | 0              | 0.283663                | -0.907242 | -0.495645 |
| 3                | 6                | 0              | -0.297425               | 0.282112  | -0.018374 |
| 4                | 6                | 0              | 0.559041                | 1.276347  | 0.489104  |
| 5                | 6                | 0              | 1.936721                | 1.110270  | 0.493827  |
| 6                | 6                | 0              | 2.472577                | -0.077147 | 0.004393  |
| 7                | 1                | 0              | 2.107654                | -2.002441 | -0.863855 |
| 8                | 1                | 0              | -0.349185               | -1.685948 | -0.903959 |
| 9                | 1                | 0              | 0.138016                | 2.179331  | 0.914600  |
| 10               | 1                | 0              | 2.596194                | 1.871756  | 0.886899  |
| 11               | 6                | 0              | -1.768665               | 0.460033  | -0.053011 |
| 12               | 6                | 0              | -2.258779               | 1.673978  | -0.393942 |
| 13               | 1                | 0              | -1.576503               | 2.474401  | -0.666533 |
| 14               | 6                | 0              | -2.600741               | -0.706076 | 0.296175  |
| 15               | 1                | 0              | -2.069507               | -1.492632 | 0.856348  |
| 16               | 7                | 0              | -3.831517               | -0.830653 | 0.006934  |
| 17               | 6                | 0              | -4.513407               | -2.024422 | 0.463068  |
| 18               | 1                | 0              | -4.952533               | -2.538205 | -0.397647 |
| 19               | 1                | 0              | -3.863260               | -2.726926 | 1.007738  |
| 20               | 1                | 0              | -5.344461               | -1.734947 | 1.113860  |
| 21               | 8                | 0              | -3.569812               | 1.980333  | -0.430146 |
| 22               | 1                | 0              | -3.681197               | 2.894150  | -0.710515 |
| 23               | 7                | 0              | 3.933953                | -0.264333 | 0.013784  |
| 24               | 8                | 0              | 4.624024                | 0.652108  | 0.447002  |
| 25               | 8                | 0              | 4.376620                | -1.324767 | -0.413596 |

### Structure 33h (CHCl<sub>3</sub>)

Energy (Hartrees): -722.348848591

No imaginary frequencies

Standard orientation:

| Center<br>Number | Atomic<br>Number | Atomic<br>Type | Coordinates (Angstroms) |           |           |
|------------------|------------------|----------------|-------------------------|-----------|-----------|
|                  |                  |                | X                       | Y         | Z         |
| 1                | 6                | 0              | 1.653782                | -1.107123 | -0.459973 |
| 2                | 6                | 0              | 0.279977                | -0.919276 | -0.467306 |
| 3                | 6                | 0              | -0.299399               | 0.281823  | -0.013070 |
| 4                | 6                | 0              | 0.561969                | 1.288096  | 0.467235  |
| 5                | 6                | 0              | 1.937798                | 1.120918  | 0.469916  |
| 6                | 6                | 0              | 2.472716                | -0.079560 | 0.004514  |
| 7                | 1                | 0              | 2.090660                | -2.027631 | -0.822269 |
| 8                | 1                | 0              | -0.350669               | -1.708383 | -0.857837 |
| 9                | 1                | 0              | 0.148354                | 2.204260  | 0.870682  |
| 10               | 1                | 0              | 2.590842                | 1.896751  | 0.845327  |
| 11               | 6                | 0              | -1.769864               | 0.461583  | -0.048547 |
| 12               | 6                | 0              | -2.252834               | 1.689581  | -0.361584 |
| 13               | 1                | 0              | -1.571406               | 2.499880  | -0.601590 |
| 14               | 6                | 0              | -2.602789               | -0.711230 | 0.269499  |
| 15               | 1                | 0              | -2.068892               | -1.522045 | 0.786154  |
| 16               | 7                | 0              | -3.843645               | -0.824987 | 0.006089  |
| 17               | 6                | 0              | -4.508526               | -2.041551 | 0.434852  |
| 18               | 1                | 0              | -4.976569               | -2.521591 | -0.430770 |
| 19               | 1                | 0              | -3.837112               | -2.762887 | 0.923575  |
| 20               | 1                | 0              | -5.317435               | -1.786355 | 1.127542  |
| 21               | 8                | 0              | -3.558468               | 1.999147  | -0.410942 |
| 22               | 1                | 0              | -3.657637               | 2.928582  | -0.657860 |
| 23               | 7                | 0              | 3.923289                | -0.266630 | 0.011105  |
| 24               | 8                | 0              | 4.629563                | 0.667364  | 0.388142  |
| 25               | 8                | 0              | 4.373326                | -1.348865 | -0.361766 |

## Structure 33h (DMSO)

Energy (Hartrees): -722.347957109

No imaginary frequencies

Standard orientation:

| Center<br>Number | Atomic<br>Number | Atomic<br>Type | Coordinates (Angstroms) |           |           |
|------------------|------------------|----------------|-------------------------|-----------|-----------|
|                  |                  |                | X                       | Y         | Z         |
| 1                | 6                | 0              | 1.647962                | -1.104776 | -0.464337 |
| 2                | 6                | 0              | 0.274699                | -0.914369 | -0.474597 |
| 3                | 6                | 0              | -0.302904               | 0.288654  | -0.022824 |
| 4                | 6                | 0              | 0.558495                | 1.295113  | 0.457250  |
| 5                | 6                | 0              | 1.933613                | 1.124312  | 0.464332  |
| 6                | 6                | 0              | 2.467955                | -0.078632 | 0.002757  |
| 7                | 1                | 0              | 2.080261                | -2.027964 | -0.825101 |
| 8                | 1                | 0              | -0.355670               | -1.704953 | -0.862710 |
| 9                | 1                | 0              | 0.147672                | 2.214843  | 0.854972  |
| 10               | 1                | 0              | 2.584142                | 1.901803  | 0.840665  |
| 11               | 6                | 0              | -1.774055               | 0.468065  | -0.055823 |
| 12               | 6                | 0              | -2.254179               | 1.700468  | -0.357840 |
| 13               | 1                | 0              | -1.570777               | 2.510819  | -0.590892 |
| 14               | 6                | 0              | -2.598257               | -0.709879 | 0.264774  |
| 15               | 1                | 0              | -2.056502               | -1.512353 | 0.784305  |
| 16               | 7                | 0              | -3.838615               | -0.843292 | 0.002442  |
| 17               | 6                | 0              | -4.480908               | -2.070021 | 0.443691  |
| 18               | 1                | 0              | -4.942916               | -2.566492 | -0.416167 |
| 19               | 1                | 0              | -3.793662               | -2.773455 | 0.935036  |
| 20               | 1                | 0              | -5.291818               | -1.825058 | 1.138155  |
| 21               | 8                | 0              | -3.558970               | 2.017154  | -0.401709 |
| 22               | 1                | 0              | -3.647187               | 2.953669  | -0.628920 |
| 23               | 7                | 0              | 3.916069                | -0.268910 | 0.015143  |
| 24               | 8                | 0              | 4.624413                | 0.658527  | 0.409010  |
| 25               | 8                | 0              | 4.368277                | -1.348063 | -0.369395 |

### Structure 33h (C<sub>2</sub>H<sub>5</sub>OH)

Energy (Hartrees): -722.353363094

No imaginary frequencies

Standard orientation:

| Center<br>Number | Atomic<br>Number | Atomic<br>Type | Coordinates (Angstroms) |           |           |
|------------------|------------------|----------------|-------------------------|-----------|-----------|
|                  |                  |                | X                       | Y         | Z         |
| 1                | 6                | 0              | 1.653852                | -1.104138 | -0.474472 |
| 2                | 6                | 0              | 0.281111                | -0.917118 | -0.484668 |
| 3                | 6                | 0              | -0.300401               | 0.279994  | -0.020268 |
| 4                | 6                | 0              | 0.557988                | 1.283831  | 0.472509  |
| 5                | 6                | 0              | 1.932666                | 1.117324  | 0.479817  |
| 6                | 6                | 0              | 2.470979                | -0.079925 | 0.005327  |
| 7                | 1                | 0              | 2.088556                | -2.021316 | -0.847715 |
| 8                | 1                | 0              | -0.346461               | -1.703687 | -0.885256 |
| 9                | 1                | 0              | 0.143803                | 2.197164  | 0.881329  |
| 10               | 1                | 0              | 2.579458                | 1.891930  | 0.868329  |
| 11               | 6                | 0              | -1.770042               | 0.460155  | -0.056129 |
| 12               | 6                | 0              | -2.246356               | 1.695529  | -0.357953 |
| 13               | 1                | 0              | -1.565531               | 2.509840  | -0.582914 |
| 14               | 6                | 0              | -2.600630               | -0.715949 | 0.248812  |
| 15               | 1                | 0              | -2.056409               | -1.545162 | 0.720314  |
| 16               | 7                | 0              | -3.853315               | -0.818689 | 0.028724  |
| 17               | 6                | 0              | -4.499231               | -2.051875 | 0.447067  |
| 18               | 1                | 0              | -5.003266               | -2.506955 | -0.411759 |
| 19               | 1                | 0              | -3.805634               | -2.784822 | 0.882301  |
| 20               | 1                | 0              | -5.277582               | -1.822380 | 1.182435  |
| 21               | 8                | 0              | -3.550348               | 2.009043  | -0.417189 |
| 22               | 1                | 0              | -3.647845               | 2.943842  | -0.646857 |
| 23               | 7                | 0              | 3.912905                | -0.265370 | 0.015738  |
| 24               | 8                | 0              | 4.627013                | 0.667389  | 0.391231  |
| 25               | 8                | 0              | 4.372606                | -1.348558 | -0.353004 |

### Structure 33i (vacuum)

Energy (Hartrees): -722.332217672

No imaginary frequencies

Standard orientation:

| Center<br>Number | Atomic<br>Number | Atomic<br>Type | Coordinates (Angstroms) |           |           |
|------------------|------------------|----------------|-------------------------|-----------|-----------|
|                  |                  |                | X                       | Y         | Z         |
| 1                | 6                | 0              | 1.516820                | -1.184125 | -0.462288 |
| 2                | 6                | 0              | 0.146578                | -0.963400 | -0.465848 |
| 3                | 6                | 0              | -0.403755               | 0.244461  | 0.002097  |
| 4                | 6                | 0              | 0.478163                | 1.232145  | 0.478357  |
| 5                | 6                | 0              | 1.849621                | 1.024753  | 0.489431  |
| 6                | 6                | 0              | 2.355193                | -0.183790 | 0.018499  |
| 7                | 1                | 0              | 1.941248                | -2.107823 | -0.830768 |
| 8                | 1                | 0              | -0.504526               | -1.734315 | -0.859816 |
| 9                | 1                | 0              | 0.084127                | 2.168336  | 0.847591  |
| 10               | 1                | 0              | 2.529398                | 1.779073  | 0.860972  |
| 11               | 6                | 0              | -1.869138               | 0.437648  | -0.007844 |
| 12               | 6                | 0              | -2.483858               | 1.616349  | -0.240795 |
| 13               | 1                | 0              | -3.567915               | 1.657407  | -0.234065 |
| 14               | 6                | 0              | -2.735358               | -0.734694 | 0.252592  |
| 15               | 1                | 0              | -2.236435               | -1.585887 | 0.739514  |
| 16               | 7                | 0              | -3.973898               | -0.774939 | -0.028096 |
| 17               | 6                | 0              | -4.724638               | -1.956697 | 0.347370  |
| 18               | 1                | 0              | -5.212654               | -2.372044 | -0.539515 |
| 19               | 1                | 0              | -4.108720               | -2.738776 | 0.816376  |
| 20               | 1                | 0              | -5.521090               | -1.673792 | 1.043073  |
| 21               | 8                | 0              | -1.825615               | 2.767399  | -0.516206 |
| 22               | 1                | 0              | -2.457980               | 3.473893  | -0.679646 |
| 23               | 7                | 0              | 3.811508                | -0.407990 | 0.027577  |
| 24               | 8                | 0              | 4.525704                | 0.493876  | 0.451926  |
| 25               | 8                | 0              | 4.226599                | -1.483959 | -0.389408 |

### Structure 33i (CHCl<sub>3</sub>)

Energy (Hartrees): -722.352849739

No imaginary frequencies

Standard orientation:

| Center<br>Number | Atomic<br>Number | Atomic<br>Type | Coordinates (Angstroms) |           |           |
|------------------|------------------|----------------|-------------------------|-----------|-----------|
|                  |                  |                | X                       | Y         | Z         |
| 1                | 6                | 0              | 1.502824                | -1.193691 | -0.436556 |
| 2                | 6                | 0              | 0.134805                | -0.967434 | -0.433760 |
| 3                | 6                | 0              | -0.407872               | 0.252746  | 0.015664  |
| 4                | 6                | 0              | 0.483391                | 1.245037  | 0.469940  |
| 5                | 6                | 0              | 1.853038                | 1.033556  | 0.473169  |
| 6                | 6                | 0              | 2.351390                | -0.186240 | 0.017225  |
| 7                | 1                | 0              | 1.911327                | -2.129129 | -0.793486 |
| 8                | 1                | 0              | -0.520381               | -1.744661 | -0.807429 |
| 9                | 1                | 0              | 0.099423                | 2.187271  | 0.834541  |
| 10               | 1                | 0              | 2.530578                | 1.796611  | 0.830833  |
| 11               | 6                | 0              | -1.871362               | 0.450665  | 0.010455  |
| 12               | 6                | 0              | -2.480961               | 1.637038  | -0.217471 |
| 13               | 1                | 0              | -3.563528               | 1.699935  | -0.196117 |
| 14               | 6                | 0              | -2.735062               | -0.721510 | 0.270774  |
| 15               | 1                | 0              | -2.254365               | -1.544850 | 0.816424  |
| 16               | 7                | 0              | -3.956934               | -0.797693 | -0.077643 |
| 17               | 6                | 0              | -4.705535               | -1.977575 | 0.316854  |
| 18               | 1                | 0              | -5.145530               | -2.441589 | -0.571594 |
| 19               | 1                | 0              | -4.098731               | -2.725625 | 0.847238  |
| 20               | 1                | 0              | -5.538443               | -1.680467 | 0.963008  |
| 21               | 8                | 0              | -1.819864               | 2.775897  | -0.504592 |
| 22               | 1                | 0              | -2.451006               | 3.493456  | -0.649437 |
| 23               | 7                | 0              | 3.796894                | -0.413825 | 0.016786  |
| 24               | 8                | 0              | 4.531221                | 0.502799  | 0.381894  |
| 25               | 8                | 0              | 4.214018                | -1.511933 | -0.348020 |

### Structure 33i (DMSO)

Energy (Hartrees): -722.350819965

No imaginary frequencies

Standard orientation:

| Center<br>Number | Atomic<br>Number | Atomic<br>Type | Coordinates (Angstroms) |           |           |
|------------------|------------------|----------------|-------------------------|-----------|-----------|
|                  |                  |                | X                       | Y         | Z         |
| 1                | 6                | 0              | 1.497817                | -1.201719 | -0.412027 |
| 2                | 6                | 0              | 0.130201                | -0.974060 | -0.406044 |
| 3                | 6                | 0              | -0.408185               | 0.256692  | 0.020128  |
| 4                | 6                | 0              | 0.486871                | 1.256495  | 0.450954  |
| 5                | 6                | 0              | 1.856029                | 1.043428  | 0.450780  |
| 6                | 6                | 0              | 2.350747                | -0.186155 | 0.016128  |
| 7                | 1                | 0              | 1.899280                | -2.146423 | -0.752007 |
| 8                | 1                | 0              | -0.527093               | -1.760552 | -0.756058 |
| 9                | 1                | 0              | 0.108383                | 2.205547  | 0.803033  |
| 10               | 1                | 0              | 2.533282                | 1.814342  | 0.791734  |
| 11               | 6                | 0              | -1.870868               | 0.455331  | 0.019283  |
| 12               | 6                | 0              | -2.485458               | 1.641701  | -0.198279 |
| 13               | 1                | 0              | -3.567402               | 1.706292  | -0.155952 |
| 14               | 6                | 0              | -2.732655               | -0.717235 | 0.284611  |
| 15               | 1                | 0              | -2.267933               | -1.518971 | 0.873151  |
| 16               | 7                | 0              | -3.939440               | -0.814792 | -0.110491 |
| 17               | 6                | 0              | -4.696106               | -1.987154 | 0.296241  |
| 18               | 1                | 0              | -5.087163               | -2.492215 | -0.592915 |
| 19               | 1                | 0              | -4.107954               | -2.704005 | 0.886110  |
| 20               | 1                | 0              | -5.562287               | -1.672304 | 0.888106  |
| 21               | 8                | 0              | -1.831886               | 2.781741  | -0.497431 |
| 22               | 1                | 0              | -2.470244               | 3.501464  | -0.600645 |
| 23               | 7                | 0              | 3.794265                | -0.414918 | 0.011453  |
| 24               | 8                | 0              | 4.533676                | 0.508603  | 0.353266  |
| 25               | 8                | 0              | 4.210084                | -1.521487 | -0.333578 |



### Structure 33i (C<sub>2</sub>H<sub>5</sub>OH)

Energy (Hartrees): -722.355131766

No imaginary frequencies

Standard orientation:

| Center<br>Number | Atomic<br>Number | Atomic<br>Type | Coordinates (Angstroms) |           |           |
|------------------|------------------|----------------|-------------------------|-----------|-----------|
|                  |                  |                | X                       | Y         | Z         |
| 1                | 6                | 0              | 1.492022                | -1.203566 | -0.407197 |
| 2                | 6                | 0              | 0.126030                | -0.973005 | -0.400549 |
| 3                | 6                | 0              | -0.410496               | 0.260716  | 0.022489  |
| 4                | 6                | 0              | 0.487371                | 1.260145  | 0.451352  |
| 5                | 6                | 0              | 1.855279                | 1.044909  | 0.450899  |
| 6                | 6                | 0              | 2.347734                | -0.187331 | 0.017600  |
| 7                | 1                | 0              | 1.890558                | -2.149798 | -0.746586 |
| 8                | 1                | 0              | -0.533023               | -1.758485 | -0.749645 |
| 9                | 1                | 0              | 0.110374                | 2.209147  | 0.805192  |
| 10               | 1                | 0              | 2.533540                | 1.814789  | 0.792479  |
| 11               | 6                | 0              | -1.871616               | 0.460411  | 0.020331  |
| 12               | 6                | 0              | -2.483586               | 1.649936  | -0.196574 |
| 13               | 1                | 0              | -3.564794               | 1.720963  | -0.156946 |
| 14               | 6                | 0              | -2.731854               | -0.712122 | 0.283801  |
| 15               | 1                | 0              | -2.269798               | -1.505829 | 0.885151  |
| 16               | 7                | 0              | -3.934433               | -0.822524 | -0.122565 |
| 17               | 6                | 0              | -4.680687               | -1.999288 | 0.294189  |
| 18               | 1                | 0              | -5.058656               | -2.521749 | -0.590333 |
| 19               | 1                | 0              | -4.089019               | -2.700855 | 0.898235  |
| 20               | 1                | 0              | -5.555598               | -1.688432 | 0.874828  |
| 21               | 8                | 0              | -1.827874               | 2.787446  | -0.491833 |
| 22               | 1                | 0              | -2.457949               | 3.514220  | -0.593545 |
| 23               | 7                | 0              | 3.783993                | -0.416899 | 0.009444  |
| 24               | 8                | 0              | 4.532511                | 0.506418  | 0.337351  |
| 25               | 8                | 0              | 4.203647                | -1.526718 | -0.326146 |

### Structure 33j (vacuum)

Energy (Hartrees): -722.333091536

No imaginary frequencies

Standard orientation:

| Center<br>Number | Atomic<br>Number | Atomic<br>Type | Coordinates (Angstroms) |           |           |
|------------------|------------------|----------------|-------------------------|-----------|-----------|
|                  |                  |                | X                       | Y         | Z         |
| 1                | 6                | 0              | 1.330515                | -0.987919 | -0.710854 |
| 2                | 6                | 0              | -0.034931               | -0.738470 | -0.729268 |
| 3                | 6                | 0              | -0.576030               | 0.365843  | -0.051838 |
| 4                | 6                | 0              | 0.292391                | 1.208184  | 0.660371  |
| 5                | 6                | 0              | 1.658874                | 0.965609  | 0.695382  |
| 6                | 6                | 0              | 2.161969                | -0.131203 | 0.003600  |
| 7                | 1                | 0              | 1.755671                | -1.832162 | -1.235609 |
| 8                | 1                | 0              | -0.690645               | -1.409429 | -1.264800 |
| 9                | 1                | 0              | -0.105713               | 2.059755  | 1.195560  |
| 10               | 1                | 0              | 2.332169                | 1.606719  | 1.247169  |
| 11               | 6                | 0              | -2.034348               | 0.637568  | -0.087482 |
| 12               | 6                | 0              | -2.548293               | 1.871108  | -0.282992 |
| 13               | 1                | 0              | -3.624464               | 2.018941  | -0.303501 |
| 14               | 6                | 0              | -3.023868               | -0.434450 | 0.090212  |
| 15               | 1                | 0              | -4.074402               | -0.099906 | 0.051323  |
| 16               | 7                | 0              | -2.734470               | -1.655008 | 0.287079  |
| 17               | 6                | 0              | -3.822432               | -2.595600 | 0.465064  |
| 18               | 1                | 0              | -3.751625               | -3.381236 | -0.293622 |
| 19               | 1                | 0              | -3.718357               | -3.086156 | 1.437675  |
| 20               | 1                | 0              | -4.820082               | -2.133436 | 0.405243  |
| 21               | 8                | 0              | -1.791439               | 2.978699  | -0.475977 |
| 22               | 1                | 0              | -2.354421               | 3.738778  | -0.650590 |
| 23               | 7                | 0              | 3.613119                | -0.394186 | 0.031611  |
| 24               | 8                | 0              | 4.321189                | 0.374862  | 0.672635  |
| 25               | 8                | 0              | 4.030030                | -1.366253 | -0.588264 |

### Structure 33j (CHCl<sub>3</sub>)

Energy (Hartrees): -722.354951784

No imaginary frequencies

Standard orientation:

| Center<br>Number | Atomic<br>Number | Atomic<br>Type | Coordinates (Angstroms) |           |           |
|------------------|------------------|----------------|-------------------------|-----------|-----------|
|                  |                  |                | X                       | Y         | Z         |
| 1                | 6                | 0              | 1.339324                | -0.950107 | -0.767233 |
| 2                | 6                | 0              | -0.025080               | -0.700446 | -0.788434 |
| 3                | 6                | 0              | -0.578282               | 0.363195  | -0.055684 |
| 4                | 6                | 0              | 0.280059                | 1.166089  | 0.713631  |
| 5                | 6                | 0              | 1.646265                | 0.925706  | 0.751250  |
| 6                | 6                | 0              | 2.161302                | -0.131800 | 0.005100  |
| 7                | 1                | 0              | 1.764512                | -1.763086 | -1.339356 |
| 8                | 1                | 0              | -0.667888               | -1.334746 | -1.382676 |
| 9                | 1                | 0              | -0.126455               | 1.982378  | 1.296242  |
| 10               | 1                | 0              | 2.303576                | 1.541405  | 1.349528  |
| 11               | 6                | 0              | -2.036046               | 0.634700  | -0.096812 |
| 12               | 6                | 0              | -2.542571               | 1.873746  | -0.294517 |
| 13               | 1                | 0              | -3.616494               | 2.033727  | -0.323216 |
| 14               | 6                | 0              | -3.023582               | -0.435636 | 0.075783  |
| 15               | 1                | 0              | -4.071881               | -0.111322 | -0.007493 |
| 16               | 7                | 0              | -2.733589               | -1.650948 | 0.320809  |
| 17               | 6                | 0              | -3.829731               | -2.588717 | 0.481902  |
| 18               | 1                | 0              | -3.739466               | -3.387598 | -0.261801 |
| 19               | 1                | 0              | -3.758550               | -3.064855 | 1.465244  |
| 20               | 1                | 0              | -4.822678               | -2.125671 | 0.382985  |
| 21               | 8                | 0              | -1.776172               | 2.967127  | -0.486473 |
| 22               | 1                | 0              | -2.336021               | 3.739138  | -0.642218 |
| 23               | 7                | 0              | 3.604013                | -0.390920 | 0.034019  |
| 24               | 8                | 0              | 4.315763                | 0.351415  | 0.707821  |
| 25               | 8                | 0              | 4.038961                | -1.338125 | -0.617716 |

## Structure 33j (DMSO)

Energy (Hartrees): -722.354100105

No imaginary frequencies

Standard orientation:

| Center<br>Number | Atomic<br>Number | Atomic<br>Type | Coordinates (Angstroms) |           |           |
|------------------|------------------|----------------|-------------------------|-----------|-----------|
|                  |                  |                | X                       | Y         | Z         |
| 1                | 6                | 0              | 1.352104                | -0.877944 | -0.848156 |
| 2                | 6                | 0              | -0.013041               | -0.631888 | -0.871164 |
| 3                | 6                | 0              | -0.582264               | 0.367459  | -0.064252 |
| 4                | 6                | 0              | 0.258539                | 1.112654  | 0.778005  |
| 5                | 6                | 0              | 1.625384                | 0.874473  | 0.819162  |
| 6                | 6                | 0              | 2.156973                | -0.120749 | 0.001861  |
| 7                | 1                | 0              | 1.787758                | -1.641666 | -1.477541 |
| 8                | 1                | 0              | -0.643224               | -1.215302 | -1.529309 |
| 9                | 1                | 0              | -0.161512               | 1.878040  | 1.417974  |
| 10               | 1                | 0              | 2.267496                | 1.445206  | 1.475724  |
| 11               | 6                | 0              | -2.042555               | 0.629177  | -0.100640 |
| 12               | 6                | 0              | -2.556739               | 1.865132  | -0.295301 |
| 13               | 1                | 0              | -3.631330               | 2.021189  | -0.316937 |
| 14               | 6                | 0              | -3.016212               | -0.450466 | 0.077827  |
| 15               | 1                | 0              | -4.067526               | -0.142233 | -0.009835 |
| 16               | 7                | 0              | -2.707005               | -1.660599 | 0.334405  |
| 17               | 6                | 0              | -3.792037               | -2.613488 | 0.497717  |
| 18               | 1                | 0              | -3.686616               | -3.417785 | -0.238442 |
| 19               | 1                | 0              | -3.721243               | -3.079643 | 1.486191  |
| 20               | 1                | 0              | -4.789492               | -2.164377 | 0.388233  |
| 21               | 8                | 0              | -1.793305               | 2.958214  | -0.497794 |
| 22               | 1                | 0              | -2.361365               | 3.729447  | -0.631552 |
| 23               | 7                | 0              | 3.598758                | -0.379696 | 0.038273  |
| 24               | 8                | 0              | 4.292093                | 0.284437  | 0.807803  |
| 25               | 8                | 0              | 4.054196                | -1.249772 | -0.702959 |

### Structure 33j (C<sub>2</sub>H<sub>5</sub>OH)

Energy (Hartrees): -722.357970198

No imaginary frequencies

Standard orientation:

| Center<br>Number | Atomic<br>Number | Atomic<br>Type | Coordinates (Angstroms) |           |           |
|------------------|------------------|----------------|-------------------------|-----------|-----------|
|                  |                  |                | X                       | Y         | Z         |
| 1                | 6                | 0              | 1.360092                | -0.843264 | -0.887536 |
| 2                | 6                | 0              | -0.004885               | -0.599273 | -0.910301 |
| 3                | 6                | 0              | -0.581668               | 0.365997  | -0.068066 |
| 4                | 6                | 0              | 0.250828                | 1.080641  | 0.808537  |
| 5                | 6                | 0              | 1.616966                | 0.842602  | 0.852693  |
| 6                | 6                | 0              | 2.156168                | -0.119362 | 0.000192  |
| 7                | 1                | 0              | 1.801508                | -1.580672 | -1.543769 |
| 8                | 1                | 0              | -0.629228               | -1.156355 | -1.596661 |
| 9                | 1                | 0              | -0.177085               | 1.821053  | 1.472808  |
| 10               | 1                | 0              | 2.252010                | 1.388659  | 1.536518  |
| 11               | 6                | 0              | -2.042263               | 0.626201  | -0.103546 |
| 12               | 6                | 0              | -2.551679               | 1.864846  | -0.295252 |
| 13               | 1                | 0              | -3.624526               | 2.030281  | -0.319977 |
| 14               | 6                | 0              | -3.014633               | -0.452758 | 0.073903  |
| 15               | 1                | 0              | -4.065385               | -0.143457 | -0.016216 |
| 16               | 7                | 0              | -2.708338               | -1.663152 | 0.336350  |
| 17               | 6                | 0              | -3.800430               | -2.608865 | 0.500457  |
| 18               | 1                | 0              | -3.702968               | -3.413858 | -0.235852 |
| 19               | 1                | 0              | -3.732515               | -3.076606 | 1.488171  |
| 20               | 1                | 0              | -4.794912               | -2.153291 | 0.392529  |
| 21               | 8                | 0              | -1.782517               | 2.954682  | -0.491677 |
| 22               | 1                | 0              | -2.340156               | 3.731365  | -0.635288 |
| 23               | 7                | 0              | 3.592230                | -0.378551 | 0.040873  |
| 24               | 8                | 0              | 4.276989                | 0.226660  | 0.866454  |
| 25               | 8                | 0              | 4.067408                | -1.193317 | -0.750941 |

### Structure 33k (vacuum)

Energy (Hartrees): -722.332623865

No imaginary frequencies

Standard orientation:

| Center<br>Number | Atomic<br>Number | Atomic<br>Type | Coordinates (Angstroms) |           |           |
|------------------|------------------|----------------|-------------------------|-----------|-----------|
|                  |                  |                | X                       | Y         | Z         |
| 1                | 6                | 0              | -1.503756               | 0.910120  | -0.694725 |
| 2                | 6                | 0              | -0.129332               | 0.722995  | -0.711072 |
| 3                | 6                | 0              | 0.458949                | -0.374184 | -0.059390 |
| 4                | 6                | 0              | -0.377527               | -1.263893 | 0.634771  |
| 5                | 6                | 0              | -1.755884               | -1.091463 | 0.657841  |
| 6                | 6                | 0              | -2.303163               | -0.003674 | -0.012639 |
| 7                | 1                | 0              | -1.963447               | 1.747421  | -1.201311 |
| 8                | 1                | 0              | 0.498645                | 1.432896  | -1.229566 |
| 9                | 1                | 0              | 0.058850                | -2.087001 | 1.188164  |
| 10               | 1                | 0              | -2.402456               | -1.771637 | 1.194819  |
| 11               | 6                | 0              | 1.923524                | -0.606393 | -0.115284 |
| 12               | 6                | 0              | 2.370476                | -1.857347 | -0.359626 |
| 13               | 1                | 0              | 1.682990                | -2.673818 | -0.555800 |
| 14               | 6                | 0              | 2.889956                | 0.482168  | 0.085300  |
| 15               | 1                | 0              | 3.944583                | 0.192199  | -0.001978 |
| 16               | 7                | 0              | 2.548181                | 1.678441  | 0.352157  |
| 17               | 6                | 0              | 3.600293                | 2.657099  | 0.542614  |
| 18               | 1                | 0              | 3.466418                | 3.475581  | -0.171728 |
| 19               | 1                | 0              | 3.505428                | 3.093784  | 1.541629  |
| 20               | 1                | 0              | 4.614170                | 2.245279  | 0.427599  |
| 21               | 8                | 0              | 3.693669                | -2.171746 | -0.386299 |
| 22               | 1                | 0              | 3.811271                | -3.083132 | -0.668981 |
| 23               | 7                | 0              | -3.764330               | 0.191561  | 0.007996  |
| 24               | 8                | 0              | -4.442378               | -0.631018 | 0.614397  |
| 25               | 8                | 0              | -4.219368               | 1.163493  | -0.584432 |

## Structure 33k (CHCl<sub>3</sub>)

Energy (Hartrees): -722.353952278

No imaginary frequencies

Standard orientation:

| Center<br>Number | Atomic<br>Number | Atomic<br>Type | Coordinates (Angstroms) |           |           |
|------------------|------------------|----------------|-------------------------|-----------|-----------|
|                  |                  |                | X                       | Y         | Z         |
| 1                | 6                | 0              | -1.508693               | 0.908102  | -0.706901 |
| 2                | 6                | 0              | -0.135705               | 0.718733  | -0.726482 |
| 3                | 6                | 0              | 0.456407                | -0.373340 | -0.066071 |
| 4                | 6                | 0              | -0.379251               | -1.259815 | 0.636224  |
| 5                | 6                | 0              | -1.756167               | -1.086646 | 0.662532  |
| 6                | 6                | 0              | -2.307272               | -0.000691 | -0.012809 |
| 7                | 1                | 0              | -1.961704               | 1.742424  | -1.224565 |
| 8                | 1                | 0              | 0.485521                | 1.419135  | -1.266899 |
| 9                | 1                | 0              | 0.056668                | -2.083053 | 1.189299  |
| 10               | 1                | 0              | -2.392932               | -1.769359 | 1.208204  |
| 11               | 6                | 0              | 1.919552                | -0.602783 | -0.124554 |
| 12               | 6                | 0              | 2.366696                | -1.861248 | -0.348529 |
| 13               | 1                | 0              | 1.682165                | -2.685090 | -0.522309 |
| 14               | 6                | 0              | 2.885914                | 0.486898  | 0.053327  |
| 15               | 1                | 0              | 3.935089                | 0.212738  | -0.107728 |
| 16               | 7                | 0              | 2.561201                | 1.672443  | 0.390639  |
| 17               | 6                | 0              | 3.627517                | 2.644515  | 0.548596  |
| 18               | 1                | 0              | 3.449282                | 3.491640  | -0.122076 |
| 19               | 1                | 0              | 3.603882                | 3.041564  | 1.568781  |
| 20               | 1                | 0              | 4.629019                | 2.236788  | 0.348641  |
| 21               | 8                | 0              | 3.682734                | -2.172299 | -0.384534 |
| 22               | 1                | 0              | 3.793963                | -3.098284 | -0.636069 |
| 23               | 7                | 0              | -3.758432               | 0.195079  | 0.011895  |
| 24               | 8                | 0              | -4.447499               | -0.627169 | 0.613408  |
| 25               | 8                | 0              | -4.224524               | 1.171528  | -0.572000 |

## Structure 33k (DMSO)

Energy (Hartrees): -722.352798771

No imaginary frequencies

Standard orientation:

| Center<br>Number | Atomic<br>Number | Atomic<br>Type | Coordinates (Angstroms) |           |           |
|------------------|------------------|----------------|-------------------------|-----------|-----------|
|                  |                  |                | X                       | Y         | Z         |
| 1                | 6                | 0              | -1.509870               | 0.897268  | -0.722268 |
| 2                | 6                | 0              | -0.137198               | 0.707468  | -0.743833 |
| 3                | 6                | 0              | 0.457449                | -0.378593 | -0.074791 |
| 4                | 6                | 0              | -0.376176               | -1.263407 | 0.632244  |
| 5                | 6                | 0              | -1.752740               | -1.088793 | 0.661713  |
| 6                | 6                | 0              | -2.306317               | -0.005160 | -0.016521 |
| 7                | 1                | 0              | -1.961450               | 1.727186  | -1.248127 |
| 8                | 1                | 0              | 0.480606                | 1.400755  | -1.297958 |
| 9                | 1                | 0              | 0.059732                | -2.088711 | 1.182222  |
| 10               | 1                | 0              | -2.384937               | -1.771469 | 1.212677  |
| 11               | 6                | 0              | 1.921316                | -0.600886 | -0.130321 |
| 12               | 6                | 0              | 2.373849                | -1.860154 | -0.343447 |
| 13               | 1                | 0              | 1.691917                | -2.688199 | -0.506348 |
| 14               | 6                | 0              | 2.879566                | 0.495528  | 0.042845  |
| 15               | 1                | 0              | 3.927868                | 0.238227  | -0.145840 |
| 16               | 7                | 0              | 2.552250                | 1.672623  | 0.410069  |
| 17               | 6                | 0              | 3.615091                | 2.652027  | 0.558348  |
| 18               | 1                | 0              | 3.415694                | 3.507225  | -0.096223 |
| 19               | 1                | 0              | 3.613220                | 3.033941  | 1.584747  |
| 20               | 1                | 0              | 4.613504                | 2.254229  | 0.328477  |
| 21               | 8                | 0              | 3.689719                | -2.164555 | -0.379549 |
| 22               | 1                | 0              | 3.800234                | -3.096130 | -0.614004 |
| 23               | 7                | 0              | -3.755016               | 0.194855  | 0.016482  |
| 24               | 8                | 0              | -4.442929               | -0.612103 | 0.642035  |
| 25               | 8                | 0              | -4.225145               | 1.161509  | -0.583647 |



## Structure 33k (C<sub>2</sub>H<sub>5</sub>OH)

Energy (Hartrees): -722.356677823

No imaginary frequencies

Standard orientation:

| Center<br>Number | Atomic<br>Number | Atomic<br>Type | Coordinates (Angstroms) |           |           |
|------------------|------------------|----------------|-------------------------|-----------|-----------|
|                  |                  |                | X                       | Y         | Z         |
| 1                | 6                | 0              | -1.511621               | 0.904284  | -0.717313 |
| 2                | 6                | 0              | -0.140003               | 0.713641  | -0.737483 |
| 3                | 6                | 0              | 0.453886                | -0.375135 | -0.070825 |
| 4                | 6                | 0              | -0.381491               | -1.261680 | 0.633547  |
| 5                | 6                | 0              | -1.757030               | -1.086973 | 0.662292  |
| 6                | 6                | 0              | -2.309830               | -0.000583 | -0.014427 |
| 7                | 1                | 0              | -1.961468               | 1.735251  | -1.243185 |
| 8                | 1                | 0              | 0.478315                | 1.407223  | -1.290517 |
| 9                | 1                | 0              | 0.053536                | -2.087548 | 1.183316  |
| 10               | 1                | 0              | -2.389443               | -1.770606 | 1.211912  |
| 11               | 6                | 0              | 1.916016                | -0.600051 | -0.128368 |
| 12               | 6                | 0              | 2.365293                | -1.861377 | -0.343024 |
| 13               | 1                | 0              | 1.685065                | -2.690667 | -0.505476 |
| 14               | 6                | 0              | 2.879975                | 0.492043  | 0.037450  |
| 15               | 1                | 0              | 3.923427                | 0.230705  | -0.171532 |
| 16               | 7                | 0              | 2.566485                | 1.668454  | 0.420219  |
| 17               | 6                | 0              | 3.641835                | 2.637413  | 0.551994  |
| 18               | 1                | 0              | 3.437138                | 3.498668  | -0.092681 |
| 19               | 1                | 0              | 3.666650                | 3.013665  | 1.580020  |
| 20               | 1                | 0              | 4.631334                | 2.232584  | 0.298075  |
| 21               | 8                | 0              | 3.679569                | -2.168784 | -0.383336 |
| 22               | 1                | 0              | 3.794109                | -3.099586 | -0.617841 |
| 23               | 7                | 0              | -3.751813               | 0.197650  | 0.015275  |
| 24               | 8                | 0              | -4.448708               | -0.614162 | 0.627478  |
| 25               | 8                | 0              | -4.226304               | 1.170207  | -0.574593 |

### Structure 331 (vacuum)

Energy (Hartrees): -722.331642165

No imaginary frequencies

Standard orientation:

| Center<br>Number | Atomic<br>Number | Atomic<br>Type | Coordinates (Angstroms) |           |           |
|------------------|------------------|----------------|-------------------------|-----------|-----------|
|                  |                  |                | X                       | Y         | Z         |
| 1                | 6                | 0              | -1.500989               | 0.896139  | -0.715849 |
| 2                | 6                | 0              | -0.127089               | 0.705871  | -0.735002 |
| 3                | 6                | 0              | 0.461994                | -0.379863 | -0.066212 |
| 4                | 6                | 0              | -0.371798               | -1.257879 | 0.644569  |
| 5                | 6                | 0              | -1.749940               | -1.082273 | 0.670934  |
| 6                | 6                | 0              | -2.298182               | -0.004287 | -0.013986 |
| 7                | 1                | 0              | -1.961858               | 1.724630  | -1.235668 |
| 8                | 1                | 0              | 0.498007                | 1.405088  | -1.271812 |
| 9                | 1                | 0              | 0.065509                | -2.075804 | 1.204783  |
| 10               | 1                | 0              | -2.395187               | -1.753556 | 1.220549  |
| 11               | 6                | 0              | 1.928281                | -0.615563 | -0.122500 |
| 12               | 6                | 0              | 2.363373                | -1.875625 | -0.370833 |
| 13               | 1                | 0              | 1.665477                | -2.679658 | -0.569186 |
| 14               | 6                | 0              | 2.876196                | 0.482088  | 0.080032  |
| 15               | 1                | 0              | 3.947681                | 0.233163  | -0.029682 |
| 16               | 7                | 0              | 2.542207                | 1.673655  | 0.369964  |
| 17               | 6                | 0              | 3.588149                | 2.657991  | 0.553419  |
| 18               | 1                | 0              | 3.436016                | 3.483180  | -0.149047 |
| 19               | 1                | 0              | 3.508533                | 3.081781  | 1.559011  |
| 20               | 1                | 0              | 4.603774                | 2.255410  | 0.415087  |
| 21               | 8                | 0              | 3.633110                | -2.331004 | -0.434430 |
| 22               | 1                | 0              | 4.267292                | -1.633525 | -0.230068 |
| 23               | 7                | 0              | -3.759321               | 0.195776  | 0.011991  |
| 24               | 8                | 0              | -4.435310               | -0.611773 | 0.639796  |
| 25               | 8                | 0              | -4.214726               | 1.156987  | -0.597251 |

### Structure 331 (CHCl<sub>3</sub>)

Energy (Hartrees): -722.352281898

No imaginary frequencies

Standard orientation:

| Center<br>Number | Atomic<br>Number | Atomic<br>Type | Coordinates (Angstroms) |           |           |
|------------------|------------------|----------------|-------------------------|-----------|-----------|
|                  |                  |                | X                       | Y         | Z         |
| 1                | 6                | 0              | -1.504365               | 0.902811  | -0.715673 |
| 2                | 6                | 0              | -0.131877               | 0.710825  | -0.739063 |
| 3                | 6                | 0              | 0.460382                | -0.378238 | -0.074596 |
| 4                | 6                | 0              | -0.373428               | -1.260487 | 0.634084  |
| 5                | 6                | 0              | -1.750216               | -1.084980 | 0.664116  |
| 6                | 6                | 0              | -2.301630               | -0.001371 | -0.014112 |
| 7                | 1                | 0              | -1.957949               | 1.735014  | -1.236181 |
| 8                | 1                | 0              | 0.487973                | 1.407823  | -1.285852 |
| 9                | 1                | 0              | 0.062866                | -2.083446 | 1.187238  |
| 10               | 1                | 0              | -2.386045               | -1.764926 | 1.214273  |
| 11               | 6                | 0              | 1.924885                | -0.611440 | -0.136586 |
| 12               | 6                | 0              | 2.357349                | -1.878285 | -0.361432 |
| 13               | 1                | 0              | 1.659041                | -2.686105 | -0.545509 |
| 14               | 6                | 0              | 2.877358                | 0.488203  | 0.036228  |
| 15               | 1                | 0              | 3.932704                | 0.262094  | -0.181917 |
| 16               | 7                | 0              | 2.553890                | 1.659454  | 0.417949  |
| 17               | 6                | 0              | 3.606797                | 2.647807  | 0.554697  |
| 18               | 1                | 0              | 3.382717                | 3.507769  | -0.084783 |
| 19               | 1                | 0              | 3.620593                | 3.017567  | 1.585025  |
| 20               | 1                | 0              | 4.606227                | 2.265918  | 0.299251  |
| 21               | 8                | 0              | 3.625015                | -2.332258 | -0.414573 |
| 22               | 1                | 0              | 4.267026                | -1.641665 | -0.195474 |
| 23               | 7                | 0              | -3.752687               | 0.197971  | 0.016101  |
| 24               | 8                | 0              | -4.440559               | -0.618599 | 0.626102  |
| 25               | 8                | 0              | -4.218843               | 1.171972  | -0.571578 |

### Structure 331 (DMSO)

Energy (Hartrees): -722.351528484

No imaginary frequencies

Standard orientation:

| Center<br>Number | Atomic<br>Number | Atomic<br>Type | Coordinates (Angstroms) |           |           |
|------------------|------------------|----------------|-------------------------|-----------|-----------|
|                  |                  |                | X                       | Y         | Z         |
| 1                | 6                | 0              | -1.504764               | 0.879197  | -0.746548 |
| 2                | 6                | 0              | -0.132271               | 0.687499  | -0.768390 |
| 3                | 6                | 0              | 0.462680                | -0.382336 | -0.075056 |
| 4                | 6                | 0              | -0.367875               | -1.249010 | 0.656091  |
| 5                | 6                | 0              | -1.744439               | -1.071906 | 0.687128  |
| 6                | 6                | 0              | -2.298958               | -0.004989 | -0.015693 |
| 7                | 1                | 0              | -1.957718               | 1.695860  | -1.291594 |
| 8                | 1                | 0              | 0.484320                | 1.366137  | -1.341980 |
| 9                | 1                | 0              | 0.069932                | -2.062495 | 1.221997  |
| 10               | 1                | 0              | -2.375261               | -1.740534 | 1.256559  |
| 11               | 6                | 0              | 1.928046                | -0.610557 | -0.132458 |
| 12               | 6                | 0              | 2.361446                | -1.876918 | -0.358983 |
| 13               | 1                | 0              | 1.661407                | -2.686514 | -0.528803 |
| 14               | 6                | 0              | 2.874710                | 0.491841  | 0.049498  |
| 15               | 1                | 0              | 3.935576                | 0.268822  | -0.137309 |
| 16               | 7                | 0              | 2.539595                | 1.665628  | 0.417340  |
| 17               | 6                | 0              | 3.590695                | 2.656450  | 0.568371  |
| 18               | 1                | 0              | 3.384133                | 3.507370  | -0.089329 |
| 19               | 1                | 0              | 3.579108                | 3.040263  | 1.593779  |
| 20               | 1                | 0              | 4.594409                | 2.269226  | 0.343685  |
| 21               | 8                | 0              | 3.628484                | -2.325939 | -0.432428 |
| 22               | 1                | 0              | 4.271563                | -1.623624 | -0.251747 |
| 23               | 7                | 0              | -3.748232               | 0.196306  | 0.016598  |
| 24               | 8                | 0              | -4.433277               | -0.589482 | 0.671159  |
| 25               | 8                | 0              | -4.220535               | 1.142462  | -0.613306 |

**Structure 331 (C<sub>2</sub>H<sub>5</sub>OH)**

Energy (Hartrees): -722.354742381

No imaginary frequencies

Standard orientation:

| Center<br>Number | Atomic<br>Number | Atomic<br>Type | Coordinates (Angstroms) |           |           |
|------------------|------------------|----------------|-------------------------|-----------|-----------|
|                  |                  |                | X                       | Y         | Z         |
| 1                | 6                | 0              | -1.505895               | 0.893516  | -0.732242 |
| 2                | 6                | 0              | -0.134545               | 0.700529  | -0.755046 |
| 3                | 6                | 0              | 0.459680                | -0.379384 | -0.075312 |
| 4                | 6                | 0              | -0.373460               | -1.255377 | 0.643540  |
| 5                | 6                | 0              | -1.749058               | -1.079024 | 0.674372  |
| 6                | 6                | 0              | -2.302282               | -0.001274 | -0.014783 |
| 7                | 1                | 0              | -1.956704               | 1.717811  | -1.267684 |
| 8                | 1                | 0              | 0.482496                | 1.385730  | -1.320122 |
| 9                | 1                | 0              | 0.062715                | -2.074949 | 1.201764  |
| 10               | 1                | 0              | -2.380278               | -1.755019 | 1.234683  |
| 11               | 6                | 0              | 1.923515                | -0.609148 | -0.135248 |
| 12               | 6                | 0              | 2.353424                | -1.878213 | -0.356115 |
| 13               | 1                | 0              | 1.652583                | -2.686825 | -0.527307 |
| 14               | 6                | 0              | 2.875482                | 0.491317  | 0.032344  |
| 15               | 1                | 0              | 3.925959                | 0.267855  | -0.200588 |
| 16               | 7                | 0              | 2.553953                | 1.658183  | 0.434709  |
| 17               | 6                | 0              | 3.613116                | 2.644988  | 0.558854  |
| 18               | 1                | 0              | 3.381091                | 3.508083  | -0.073815 |
| 19               | 1                | 0              | 3.647063                | 3.011352  | 1.590017  |
| 20               | 1                | 0              | 4.605701                | 2.261553  | 0.284254  |
| 21               | 8                | 0              | 3.620630                | -2.331374 | -0.421559 |
| 22               | 1                | 0              | 4.269985                | -1.640118 | -0.224976 |
| 23               | 7                | 0              | -3.744800               | 0.199175  | 0.017304  |
| 24               | 8                | 0              | -4.440850               | -0.607129 | 0.637211  |
| 25               | 8                | 0              | -4.219098               | 1.167931  | -0.578465 |
